# Supplementary material for: High-Throughput/High Content Imaging Screen Identifies Novel Small Molecule Inhibitors and Immunoproteasomes as Therapeutic Targets for Chordoma
Source: MDPI journal article supplement (doi:10.3390/pharmaceutics15041274), 2023-04-18
Supplement: s1 [file s1]

Supplementary Table S1: List of Z' factor for library plates

| Sl. No. | Plate ID | Vendor          | Replicate A | Replicate B |
|---------|----------|-----------------|-------------|-------------|
| 1       | 2089     | Biomol 4        | 0.698       | 0.485       |
| 2       | 2090     | Biomol 4        | 0.517       | 0.517       |
| 3       | 3651     | Selleck Chem    | 0.459       | 0.450       |
| 4       | 3652     | Selleck Chem    | 0.882       | 0.526       |
| 5       | 3653     | Selleck Chem    | 0.417       | 0.641       |
| 6       | 3654     | Selleck Chem    | 0.525       | 0.343       |
| 7       | 3655     | Selleck Chem    | 0.467       | 0.552       |
| 8       | 3656     | Selleck Chem    | 0.645       | 0.539       |
| 9       | 3657     | Selleck Chem    | 0.387       | 0.578       |
| 10      | 3720     | Cayman Chemical | 0.593       | 0.415       |
| 11      | 3721     | Cayman Chemical | 0.492       | 0.431       |
| 12      | 3722     | Medchem Express | 0.516       | 0.438       |
| 13      | 3723     | Medchem Express | 0.636       | 0.639       |
| 14      | 3724     | Medchem Express | 0.656       | 0.642       |
| 15      | 3725     | Medchem Express | 0.561       | 0.699       |
| 16      | 3726     | Medchem Express | 0.778       | 0.682       |
| 17      | 3727     | Medchem Express | 0.682       | 0.565       |
| 18      | 3728     | Medchem Express | 0.684       | 0.676       |
| 19      | 3729     | Medchem Express | 0.648       | 0.668       |
| 20      | 3730     | Medchem Express | 0.620       | 0.615       |

Supplementary Table S2: List of library and cherry-picked compounds from each plate

| Sl. No. | Plate ID | Vendor          | Cherry pick | No. of compounds |
|---------|----------|-----------------|-------------|------------------|
| 1       | 2089     | Biomol 4        | 0           | 640              |
| 2       | 2090     | Biomol 4        | 0           |                  |
| 3       | 3651     | Selleck Chem    | 0           | 1902             |
| 4       | 3652     | Selleck Chem    | 0           |                  |
| 5       | 3653     | Selleck Chem    | 0           |                  |
| 6       | 3654     | Selleck Chem    | 0           |                  |
| 5       | 3655     | Selleck Chem    | 0           |                  |
| 6       | 3656     | Selleck Chem    | 0           |                  |
| 7       | 3657     | Selleck Chem    | 0           |                  |
| 8       | 3720     | Cayman Chemical | 3           | 1600             |
| 9       | 3721     | Cayman Chemical | 3           |                  |
| 10      | 3722     | Medchem Express | 0           |                  |
| 11      | 3723     | Medchem Express | 4           |                  |
| 12      | 3724     | Medchem Express | 2           |                  |
| 13      | 3725     | Medchem Express | 2           |                  |
| 14      | 3726     | Medchem Express | 7           |                  |
| 15      | 3727     | Medchem Express | 7           |                  |
| 16      | 3728     | Medchem Express | 9           |                  |
| 17      | 3729     | Medchem Express | 2           |                  |
| 18      | 3730     | Medchem Express | 11          |                  |
|         |          | Total           | 50          | 4142             |

Supplementary Table S3: List of IC<sub>50</sub> values for cherry picked compounds

| <b>Compound name</b> | <b>IC<sub>50</sub> (μM)</b> |
|----------------------|-----------------------------|
| Ascomycin            | 0.749                       |
| ONX 0914             | ND                          |
| Ingenol-3-angelate   | 0.2787                      |
| NVP-BEP800           | 0.366                       |
| Radicicol            | 0.0000722                   |
| MI-773               | 0.8217                      |
| HY-10299             | 0.5974                      |
| MLN 8237             | 0.02419                     |
| MG-132               | 0.03263                     |
| KPT-330              | ND                          |
| Palbociclib          | 0.1067                      |
| AZD8055              | ND                          |
| Volasertib           | 1.192                       |
| Erlotinib            | 1.171                       |
| Cilengitide          | 1.166                       |
| OTSSP167             | 1.176                       |
| Flavopiridol         | 1.230                       |
| BAY 61-3606          | 1.229                       |
| Ruboxistaurin        | 1.214                       |
| Ispinesib            | 0.9359                      |
| Obatoclax            | 2.68                        |
| BI 2536              | 0.573                       |
| NVP-TAE 226          | 0.9528                      |
| SGI-1776             | 0.9178                      |
| LY2090314            | 0.7019                      |
| Quisinostat          | 0.8575                      |
| MEK162               | 1.212                       |
| PKC412               | 2.270                       |
| Amsacrine            | 0.6594                      |
| BNC105               | 0.9265                      |
| Tipifarnib           | 0.9954                      |
| Epoxomicin           | 0.5021                      |
| OSI-027              | 0.9978                      |
| RG7388               | 1.165                       |
| Duvelisib            | 0.6935                      |
| LEE011               | 2.222                       |
| PKI-587              | 1.211                       |
| CBL0137 HCl          | 1.193                       |
| AZD-7762             | 0.9865                      |
| MK 2206              | 4.17e-010                   |
| Nutlin (3a)          | 1.516                       |
| ARRY-520             | 1.086                       |

|             |       |
|-------------|-------|
| Zotarolimus | 1.051 |
| PF-431396   | 1.060 |
| TAK-285     | 1.103 |
| CH5132799   | 1.210 |
| AZD-5438    | 373.4 |
| LY2835219   | 1.461 |
| Icotinib    | 1.129 |
| Tozasertib  | 1.189 |

Supplementary Table S4: List of the top hits and their SMILES

| Compound name                    | SMILES                                                                                       |
|----------------------------------|----------------------------------------------------------------------------------------------|
| MLN 8237                         | <chem>COc1cccc(c1C1=NCc2c(c3c1cc(Cl)cc3)nc(nc2)Nc1ccc(c(c1)OC)C(=O)O)F</chem>                |
| MG-132                           | <chem>O=C[C@@H](NC(=O)[C@@H](NC(=O)[C@@H](NC(=O)OCc1cccc1)CC(C)C)CC(C)C</chem>               |
| Palbociclib                      | <chem>CC(=O)c1c(C)c2cnc(nc2n(c1=O)C1CCCC1)Nc1ccc(cn1)N1CCNCC1</chem>                         |
| BAY 61-3606<br>(dihydrochloride) | <chem>O=C(N)C1=CC=CN=C1NC2=NC(C3=CC=C(C(OC)=C3)OC)=CC4=NC=CN24.[H]Cl.[H]Cl</chem>            |
| BNC105                           | <chem>COC1=CC(C(C2=C(C)OC3=C(O)C(OC)=CC=C23)=O)=CC(OC)=C1OC</chem>                           |
| Tipifarnib                       | <chem>O=C1N(C2=C(C(C3=CC=CC(Cl)=C3)=C1)C=C(C=C2)[C@@](N)(C4=CN=CN4C)C5=CC=C(C=C5)Cl)C</chem> |
| OSI-027                          | <chem>O=C([C@H]1CC[C@H](C2=NC(C(N3)=CC4=C3C(OC)=CC=C4)=C5C(N)=NC=NN52)CC1)O</chem>           |
| ARRY-520                         | <chem>O=C1N(C2=C(C(C3=CC=CC(Cl)=C3)=C1)C=C(C=C2)[C@@](N)(C4=CN=CN4C)C5=CC=C(C=C5)Cl)C</chem> |
| Icotinib<br>(Hydrochloride)      | <chem>C#CC1=CC(NC2=C(C=C(OCCOCCOCCO3)C3=C4)C4=NC=N2)=CC=C1.[H]Cl</chem>                      |
| Bortezomib                       | <chem>B([C@H](CC(C)C)NC(=O)[C@H](CC1=CC=CC=C1)NC(=O)C2=NC=CN=C2)(O)O</chem>                  |

Supplementary Table S5: Structures of the top hits

| Compound name                    | Structures                                                                                                                                                                                                                                                                                                                                                                                 |
|----------------------------------|--------------------------------------------------------------------------------------------------------------------------------------------------------------------------------------------------------------------------------------------------------------------------------------------------------------------------------------------------------------------------------------------|
| MLN 8237                         | 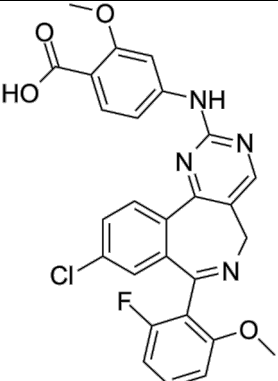 <p>The structure of MLN 8237 is a complex molecule featuring a central benzimidazole core. It is substituted with a 4-methoxyphenyl group, a 4-chlorophenyl group, and a 2-fluorophenyl group. A carboxylic acid group is attached to the benzimidazole ring.</p>                                        |
| MG-132                           |  <p>The structure of MG-132 is a cyclic peptide derivative. It consists of a six-membered ring with two amide bonds and two methyl groups. It is substituted with a benzyl group and a carboxylic acid group.</p>                                                                                         |
| Palbociclib                      |  <p>The structure of Palbociclib is a complex molecule featuring a central pyrimidine ring. It is substituted with a 4-piperidinophenyl group, a cyclopentyl group, and a carboxylic acid group.</p>                                                                                                    |
| BAY 61-3606<br>(dihydrochloride) |  <p>The structure of BAY 61-3606 dihydrochloride is a complex molecule featuring a central pyrimidine ring. It is substituted with a 4-methoxyphenyl group, a carboxylic acid group, and a carboxylic acid group. The structure is shown as a dihydrochloride salt, with two Cl-H groups indicated.</p> |

|            |                                                                                                                                                                                                                                                                                                                                                                                    |
|------------|------------------------------------------------------------------------------------------------------------------------------------------------------------------------------------------------------------------------------------------------------------------------------------------------------------------------------------------------------------------------------------|
| BNC105     | 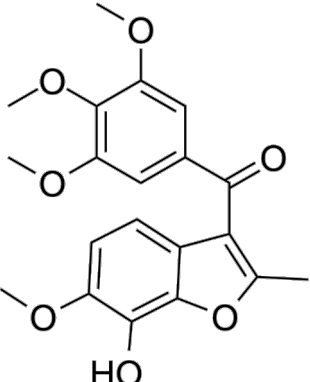 <p>Chemical structure of BNC105, a benzodioxole derivative. It features a benzodioxole core with a methoxy group at position 2, a hydroxyl group at position 3, and a 3,4,5-trimethoxybenzoyl group at position 4.</p>                                                                           |
| Tipifarnib |  <p>Chemical structure of Tipifarnib, a farnesyl transferase inhibitor. It consists of a quinoline ring system with a carbonyl group at position 1, a 4-chlorophenyl group at position 2, a 4-chlorophenyl group at position 3, and a 4-amino-1-methyl-1H-imidazol-2-yl group at position 4.</p>  |
| OSI-027    |  <p>Chemical structure of OSI-027, a triazole derivative. It features a 1,2,4-triazole ring system with an amino group at position 3, a 4-methoxyphenyl group at position 4, and a cyclohexyl group at position 5. The cyclohexyl group is further substituted with a carboxylic acid group.</p> |
| ARRY-520   |  <p>Chemical structure of ARRY-520, a thiazole derivative. It features a thiazole ring system with a 2,4-difluorophenyl group at position 2, a 4-aminophenyl group at position 3, and a 4-phenyl-1-methyl-1H-imidazol-2-yl group at position 4.</p>                                             |

|                          |                                                                                   |
|--------------------------|-----------------------------------------------------------------------------------|
| Icotinib (Hydrochloride) | 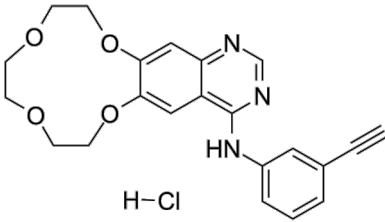 |
| Bortezomib               |  |



Supplementary Table S6: List of compounds screened in primary screening

| Vendor | Vendor Reagent ID | SMILES                                                                                                                                                                                                                                                                                                                                   | Molecular Formula | Molecular Weight | Compound Name(s)        |
|--------|-------------------|------------------------------------------------------------------------------------------------------------------------------------------------------------------------------------------------------------------------------------------------------------------------------------------------------------------------------------------|-------------------|------------------|-------------------------|
| BIOMOL | DL-552            | <chem>N1(CCCOCC1)C(=N)NC(=N)N.Cl</chem>                                                                                                                                                                                                                                                                                                  | C6H14ClN5O        | 207.661          | Moroxydine HCl          |
| BIOMOL | AC-554            | <chem>N(CCN(C)C1)(c2c(cccc2)Cc3c4ccccc3)C14</chem><br><chem>[C@@H]1([C@@H]([C@H](C)C)NC(=O)[C@@H]2C[C@@H](CCC)CN2C)</chem><br><chem>[C@H](O)[C@H](O)[C@H](O)[C@H](O)[C@H](SC)O1</chem>                                                                                                                                                   | C18H20N2          | 264.365          | Mianserin hcl           |
| BIOMOL | A-190             | <chem>c([nH]cn1)(C(=O)N(C)C(=O)N2C)c12</chem>                                                                                                                                                                                                                                                                                            | C18H33ClN2O5S     | 424.983          | Clindamycin HCl         |
| BIOMOL | AC-615            | <chem>[C@@]1([H])([C@H](O)[C@H](O)[C@H](O)C(=O)CCCCCCCCCCCCC</chem><br><chem>C)[C@@H](SC)O1)C(C(C)C)NC(=O)[C@@]2([H])N(C)C[C@]([H])(CCC)C</chem>                                                                                                                                                                                         | C34H63ClN2O6S     | 663.392          | Clindamycin PO4         |
| BIOMOL | A-192             | <chem>c1(nc(C)[nH]2)c2C(=O)N(C)C(=O)N1Cc3ccccc3</chem>                                                                                                                                                                                                                                                                                   | C12H12N4O3        | 260.249          | Furafylline             |
| BIOMOL | AC-626            | <chem>[C@@H]1([C@H](O)[C@H](C)ClC=Cl)C(=O)N[C@@H](CC)C(=O)N(C)CC</chem><br><chem>(=O)N(C)[C@@H](CC(C)C)C(=O)N[C@@H](C(C)C)C(=O)N(C)[C@@H](C</chem><br><chem>C(C)C)C(=O)N[C@@H](C)C(=O)N[C@@H](C)C(=O)N(C)[C@@H](CC(C)C)</chem><br><chem>C(=O)N(C)[C@@H](CC(C)C)C(=</chem>                                                                | C62H111N11O12     | 1202.611         | Cyclosporin a           |
| BIOMOL | DL-561            | <chem>[C@@H]1(CC[C@@H](C(C)C)CC1)C(=O)N[C@@H](C(=O)O)Cc2ccccc2</chem>                                                                                                                                                                                                                                                                    | C19H27NO3         | 317.423          | nateglinide             |
| BIOMOL | A-239             | <chem>[C@@H]1([C@@H](O)[C@H](O)[C@H](O)[C@H](O)[C@H](O)O[C@H]2</chem><br><chem>O[C@H](C)[C@@H](NC(=N)C(=O)O)C[C@@H]2N</chem>                                                                                                                                                                                                             | C14H25N3O9        | 379.363          | Kasugamycin             |
| BIOMOL | AC-729            | <chem>c1(C(O)CNC(C)C)ccc(O)c(O)c1</chem><br><chem>[C@@H]1([C@H](O)[C@H](O)[C@@H](O)[C@@H](SC)O1)[C@@H]([C@</chem><br><chem>H](O)C)NC(=O)[C@H]2N(C)C[C@H](CCC)C2</chem>                                                                                                                                                                   | C11H17NO3         | 211.258          | Isoproterenol HCl (rac) |
| BIOMOL | A-240             | <chem>[N+](C)(C)(C)CCOC(=O)C</chem>                                                                                                                                                                                                                                                                                                      | C18H34N2O6S       | 406.537          | Lincomycin              |
| BIOMOL | AC-734            | <chem>c(c(C(=O)O)C)ccc1O)(nc(c2n3)c(O)cc(O)c2C=O)c13</chem>                                                                                                                                                                                                                                                                              | C7H16NO2          | 146.207          | Acetylcholine Cl        |
| BIOMOL | A245              | <chem>[C@@H]1(OC(=O)C(CO)c2ccccc2)C[C@@]3([H])N(C)[C@]([H])(CC3)C1</chem>                                                                                                                                                                                                                                                                | C15H10N2O6        | 314.25           | Lomofungin              |
| BIOMOL | AC-735            | <chem>c(COC1=O)(c(C)c(O)C)c(ClC=C(Cl/C)CCC(=O)O)c2O)c12</chem>                                                                                                                                                                                                                                                                           | C17H20O6          | 320.337          | Mycophenolic acid       |
| BIOMOL | A-249             | <chem>C(CCCCCCCC[N+])(C)(C)C[N+](C)(C)C</chem>                                                                                                                                                                                                                                                                                           | C16H38N2          | 258.486          | Decamethonium 2Br       |
| BIOMOL | AC-737            | <chem>c(c(C)c(O)[C@@H]1OC(C)C)[C@H](OC)[C@@H](OC(=O)N)[C@@H]1O)</chem><br><chem>cc2)(OC(=O)C(NC(=O)O)c3ccc(O)c(ClC=C(Cl/C)c3)=C4O)c24</chem>                                                                                                                                                                                             | C31H36N2O11       | 612.624          | Novobiocin Na           |
| BIOMOL | A-256             | <chem>C1(C)(NC)C(C)C[C@@]2([H])C[C@]1([H])CC2</chem>                                                                                                                                                                                                                                                                                     | C11H21N           | 167.291          | Mecamylamine HCl        |
| BIOMOL | AC-741            | <chem>N(CCCC1)(C(=O)C(=O)[C@]2(O)O[C@@H](CC[C@H]2C)C[C@H](OC)C</chem><br><chem>(\C)=ClC=ClC=Cl[C@@H](C)C[C@H](C)C(=O)[C@H](OC)[C@H](O))C</chem><br><chem>(\C)=Cl[C@@H](C)C(=O)C[C@H]([C@H](C)C[C@@H]3CC[C@@H](O)</chem><br><chem>[C@H](OC)C3)OC4=O)[C@@H]14</chem>                                                                       | C51H79NO13        | 914.172          | Rapamycin               |
| BIOMOL | A-275             | <chem>c1(O)C(=O)N(C)C)cccc([N+](C)(C)C)c1</chem>                                                                                                                                                                                                                                                                                         | C12H19N2O2        | 223.291          | Neostigmine Br          |
| BIOMOL | AC-743            | <chem>c1(nsn2)c2ccc(Cl)c1NC3=NCCN3</chem>                                                                                                                                                                                                                                                                                                | C9H8ClN5S         | 253.711          | Tizanidine HCl          |
| BIOMOL | AR-103            | <chem>[C@@H]1(C[C@@H]1N)c2ccccc2</chem>                                                                                                                                                                                                                                                                                                  | C9H11N            | 133.19           | Tranylcypromine         |
| BIOMOL | DL-549            | <chem>[C@@H](O)([C@@H](O)CNC)[C@H](O)[C@H](O)CO</chem>                                                                                                                                                                                                                                                                                   | C7H17NO5          | 195.214          | Meglumine               |
| BIOMOL | EI-217            | <chem>c(cccc1)(C(O)=C(C(=O)Nc2ncccc2)N(C)S3(=O)=O)c13</chem>                                                                                                                                                                                                                                                                             | C15H13N3O4S       | 331.346          | Piroxicam               |
| BIOMOL | EI-219            | <chem>c1(cccc2)c2cccc1OC[C@@H](O)CNC(C)C</chem>                                                                                                                                                                                                                                                                                          | C16H21NO2         | 259.343          | Propranolol HCl s(-)    |
| BIOMOL | AR-107            | <chem>c1(ccccc1)CC(C)N(C)CC#C</chem>                                                                                                                                                                                                                                                                                                     | C13H17N           | 187.281          | Deprenyl HCl r (-)      |
| BIOMOL | EI-240            | <chem>c1(c(O)C(O)CNCCOC2c2ccccc2O)C)ccc3)c3[nH]c4c1cccc4</chem><br><chem>[C@@]12(C(=O)[C@H](C)[C@@H](OC(=O)C)[C@@H](C)[C@@H](C)O</chem><br><chem>C(=O)[C@H](C)[C@@H](O)[C@@H]3O[C@@H](C)[C@H](OC(=O)C)[C</chem><br><chem>@@H](OC)C3)[C@H](C)[C@@H](O)[C@@H]4O[C@H](C)C[C@H](N(C)C)</chem><br><chem>[C@H]4O)C(=O)C)[C@@H](C)C1)OC2</chem> | C41H67NO15        | 813.968          | Troleandomycin          |
| BIOMOL | EI-249            | <chem>c1(c2ccc(F)cc2)c(COC)c(Cl(C)C)nc(Cl(C)C)c1ClC=Cl[C@@H](O)C[C@@H](</chem><br><chem>O)CC(O)=O</chem>                                                                                                                                                                                                                                 | C26H34FNO5        | 459.55           | Cerivastatin            |
| BIOMOL | DL-223            | <chem>[C@@](C)(NN)(C(=O)O)Cc1ccc(O)c(O)c1</chem>                                                                                                                                                                                                                                                                                         | C10H14N2O4        | 226.229          | Carbidopa               |
| BIOMOL | EI-265            | <chem>c(cc(c1c2O)C(=O)c(c3C1=O)cccc3O)([C@@H](C(=O)OC)[C@@](O)(CC)</chem><br><chem>C[C@@H]4O[C@@H]5O[C@@H](C)[C@@H](O)[C@@H]6O[C@@H](C)[</chem><br><chem>C@@H](O)[C@H]7CCC(=O)[C@H](C)O7)[C@@H](O)C6)[C@@H](N(C)C)</chem><br><chem>C5)c24</chem>                                                                                         | C42H53NO15        | 811.868          | Aclarubicin             |
| BIOMOL | AW8655            | <chem>c1(Oc2ccccc2)cc([N+])([O-])=O)ccc1NS(=O)(=O)C</chem>                                                                                                                                                                                                                                                                               | C13H12N2O5S       | 308.31           | Nimesulide              |
| BIOMOL | EI-287            | <chem>n1(cnc2C(=O)O)CC2c2CN(C)C(=O)c3c1ccc(F)c3</chem>                                                                                                                                                                                                                                                                                   | C15H14FN3O3       | 303.288          | Flumazenil              |
| BIOMOL | B-100             | <chem>c1(C(=O)c2ccccc2)cccc(C(C)C(=O)O)c1</chem>                                                                                                                                                                                                                                                                                         | C16H14O3          | 254.281          | Ketoprofen              |
| BIOMOL | EI-288            | <chem>C1(\C=ClC(Cl)=ClC=ClC(\C)=ClC(=O)Nc2ccc(O)cc2)=C(C)CCCC1(C)C</chem>                                                                                                                                                                                                                                                                | C26H33NO2         | 391.546          | Fenretinide             |
| BIOMOL | GR-103            | <chem>c(cccc1)(C(O)=C(C(=O)Nc2sc(C)cn2)N(C)S3(=O)=O)c13</chem>                                                                                                                                                                                                                                                                           | C14H13N3O4S2      | 351.401          | Meloxicam               |
| BIOMOL | EI-292            | <chem>c1(Nc2ccc(F)c(Cl)c2)ncnc3c1cc(OCCCN4CCOCC4)c(OC)c3</chem>                                                                                                                                                                                                                                                                          | C22H24ClFN4O3     | 446.902          | Gefitinib               |
| BIOMOL | DL-269            | <chem>c1(cccc2)c2cccc1CN(C)ClC=ClC#CC(C)(C)C</chem>                                                                                                                                                                                                                                                                                      | C21H25N           | 291.43           | Terbinafine HCl         |
| BIOMOL | EI-318            | <chem>c1(C(=O)C(C)C)c(C(C)C)nn2c1ccccc2</chem>                                                                                                                                                                                                                                                                                           | C14H18N2O         | 230.306          | Ibudilast               |
| BIOMOL | DL-270            | <chem>c1(ccccc1)CCCC([O-])=O.[Na+]</chem>                                                                                                                                                                                                                                                                                                | C10H11NaO2        | 186.183          | Sodium phenylbutyrate   |
| BIOMOL | EI-320            |                                                                                                                                                                                                                                                                                                                                          |                   |                  |                         |

|        |        |                                                                                                                                                                                                         |               |          |                            |
|--------|--------|---------------------------------------------------------------------------------------------------------------------------------------------------------------------------------------------------------|---------------|----------|----------------------------|
| BIOMOL | A-280  | [C@]([H])([C@@H](NC)[C@@H](O)[C@@H](NC)[C@@H]1O)(O[C@@]([C@]2([H]O3)(O)C(=O)C[C@@H](C)O2)[C@@]13[H][C@@]1(CC2)([C@@H](C[C@@]([H])(C3=C4)[C@@]([H])([C@@]5([H])OC4)[C@]1([H])N6C(=O)C5)N2C3)c7c6cccc7    | C14H24N2O7    | 332.35   | Spectinomycin              |
| BIOMOL | AC-745 | N(Cc1cccc1)(CC(COCC(C)C)N2CCCC2)c3cccc3                                                                                                                                                                 | C21H22N2O2    | 334.412  | Strychnine HCl             |
| BIOMOL | AC-104 | c([C@@H]1[N+](C)(C)CC2(c2cc(OC)c3O)c3O c(ccc4C[C@H]5c(c6CCN5C)cc(c(OC)c6)Oc7cc(ccc7O)C1)cc4                                                                                                             | C24H34N2O     | 366.54   | Bepridil                   |
| BIOMOL | AC-746 | c1(C(=O)c2cc(l)c(OCN(CC)CC)c(l)c2)c(CCCC)cc3c1cccc3                                                                                                                                                     | C37H41N2O6    | 609.731  | Tubocurarine Cl (+)        |
| BIOMOL | AC-105 | c(c1ccc2)(c2CCc3c4cccc3)[C@@]4([H])CN([C@]15[H])CC[C@@](O)(C(C)(C)C)C5                                                                                                                                  | C25H29I2NO3   | 645.312  | Amiodarone                 |
| BIOMOL | AC-747 | C1(C(C(=O)OC)=C(C)NC(C)=C1C(=O)OCCN(C)Cc2cccc2)c3cccc([N+](O-))=O)c3                                                                                                                                    | C25H31NO      | 361.52   | Butaclamol (+)             |
| BIOMOL | AC-108 | c(c1CCN2C)([C@@]2([H])Cc3c4c(O)c(O)c3)c4ccc1                                                                                                                                                            | C26H29N3O6    | 479.525  | Nicardipine                |
| BIOMOL | AC-748 | N1(C2CCN(CCCC(c3ccc(F)cc3)c4ccc(F)cc4)CC2)C(=O)Nc5c1cccc5                                                                                                                                               | C17H17NO2     | 267.322  | Apomorphine r (-)          |
| BIOMOL | AC-109 | N1(CCCN(C)C)c2c(cccc2)Sc3c1cc(Cl)cc3                                                                                                                                                                    | C28H29F2N3O   | 461.546  | Pimozide                   |
| BIOMOL | AC-749 | N1(CCCN(C)C)c2c(cccc2)Sc3c1cc(Cl)cc3                                                                                                                                                                    | C17H19ClN2S   | 318.864  | Chlorpromazine HCl         |
| BIOMOL | AC-110 | C(C(=O)N(C)C)(CCN1CCC(O)(c2ccc(Cl)cc2)CC1)(c3cccc3)c4cccc4                                                                                                                                              | C29H33ClN2O2  | 477.038  | Loperamide                 |
| BIOMOL | AC-751 | N1(C2CCN(CCCN3C(=O)Nc4c3cccc4)CC2)C(=O)Nc5c1ccc(Cl)c5                                                                                                                                                   | C22H24ClN5O2  | 425.911  | Domperidone                |
| BIOMOL | AC-116 | C12(CCN(CCCC(c3ccc(F)cc3)c4ccc(F)cc4)CC1)C(=O)Nc2c5cccc5                                                                                                                                                | C29H31F2N3O   | 475.573  | Fluspirilene               |
| BIOMOL | AC-753 | c1(cc(C(F)(F)F)cc2)c2Sc3c(cccc3)N1CCCN4CCN(CCO)CC4                                                                                                                                                      | C22H26F3N3OS  | 437.522  | Fluphenazine 2HCl          |
| BIOMOL | AC-117 | c1(ccc(C)cc1)S(=O)(=O)NC(=O)NCCCC                                                                                                                                                                       | C12H18N2O3S   | 270.348  | Tolbutamide                |
| BIOMOL | AC-755 | c(c1[nH]c2)(c2C[C@]3([H])[C@]4([H])C[C@@H](CSC)CN3CCC)c4ccc1                                                                                                                                            | C19H26N2S     | 314.488  | Pergolide mesylate         |
| BIOMOL | AC-118 | C(=N(C#N)(N(C)C(C)C)C)Nc1ccncc1                                                                                                                                                                         | C13H19N5      | 245.323  | Pinacidil                  |
| BIOMOL | AC-757 | c1(C(=O)NC[C@@H]2CCCN2CC)c(O)c(Cl)cc(Cl)c1OC                                                                                                                                                            | C15H20Cl2N2O3 | 347.237  | Raclopride l-tartrate s(-) |
| BIOMOL | AC-120 | c1(S(=O)(=O)NC(=O)NC2CCCC2)ccc(CCN(C(=O)c3ncc(Cl)nc3)cc1                                                                                                                                                | C21H27N5O4S   | 445.535  | Glipizide                  |
| BIOMOL | AC-758 | c1(C2CCN(CCC3=C(C)N=C4N(CCCC4)C3=O)CC2)nc5c1ccc(F)c5                                                                                                                                                    | C23H27FN4O2   | 410.484  | Risperidone                |
| BIOMOL | DL-271 | n1c(ccnc1Nc2c(C)ccc(NC(=O)c3ccc(CN4CCN(C)CC4)cc3)c2)c5ccncc5                                                                                                                                            | C29H31N7O     | 493.603  | Imatinib                   |
| BIOMOL | FR-111 | [C@H](Cc1c[nH]c(S)n1)(C([O-])=O)[N+](C)C(C)c([C@@]([H])(O)[C@@H]1O[C@@H](C)[C@@H](O)[C@@H](N)C1)C[C@@](O)(C(=O)C)C2(c(O)c(c3c4O)C(=O)c(c5C3=O)cccc5)c24                                                 | C9H15N3O2S    | 229.299  | Ergothioneine              |
| BIOMOL | DL-548 | c1(CN[C@@H]2CC[C@H](O)CC2)cc(Br)cc(Br)c1N                                                                                                                                                               | C26H27NO9     | 497.494  | Idarubicin                 |
| BIOMOL | FR-112 | c12c(ccc(n1))C=C1c3cccc([C@@H](CCc4cccc4C(C)C)O)SCC5(CC(O)=O)CC5)c3)ccc(Cl)c2                                                                                                                           | C13H18Br2N2O  | 378.103  | Ambroxol                   |
| BIOMOL | DL-273 | C(O)C(C(=O)C(CCCCCCCCCO)=C(C)C1=O)=C1OC                                                                                                                                                                 | C35H36ClNO3S  | 586.183  | Montelukast                |
| BIOMOL | FR114  | c1(ccccc1)C[C@@H](C)N(C)CC#C                                                                                                                                                                            | C19H30O5      | 338.439  | Idebenone                  |
| BIOMOL | EI-240 | C1(=O)C[C@H](O)C[C@@H](CC[C@H]2[C@@H](C)C=CC([C@@]23[H])=CCC[C@@H]3OC([C@@H](C)CC)=O)O1                                                                                                                 | C13H17N       | 187.281  | Selegiline                 |
| BIOMOL | G-233  | n1nc(Cc2ccncc2)c(cccc3)c3c1Nc4ccc(Cl)cc4                                                                                                                                                                | C23H34O5      | 390.513  | Mevastatin                 |
| BIOMOL | DL-275 | [C@]1([H])([C@@H](CC[C@H]2OC(=O)C[C@H](O)C2)[C@@H](C)C=C3)[C@]1([H])(C)C[C@@H]1OC(=O)C(C)CC                                                                                                             | C20H15ClN4    | 346.813  | Vatalanib                  |
| BIOMOL | G-244  | C3=C[C@H](C)C[C@@H]1OC(=O)C(C)CC                                                                                                                                                                        | C25H38O5      | 418.566  | Simvastatin                |
| BIOMOL | CT-100 | [C@@]12(OC1)C[C@@H](OC(=O)C=C1C=C1C=C1C(=O)O)[C@@H](OC)[C@@]2([H])[C@@]3(C)O[C@@H]3C1C=C(Cl)/C)C                                                                                                        | C26H34O7      | 458.544  | Fumagillone                |
| BIOMOL | G-430  | c(c(S([O-])(=O)=O)cc(S([O-])(=O)=O)c1)(c(NC(=O)c2ccc(C)c(NC(=O)c3cccc(NC(=O)Nc4cccc(C(=O)Nc5c(C)ccc(C(=O)Nc6ccc(S([O-])(=O)=O)c7c6c(S([O-])(=O)=O)cc(S([O-])(=O)=O)c7)c5)c4)c3)c2)ccc8S([O-])(=O)=O)c18 | C51H34N6O23S6 | 1291.232 | Suramin sodium             |
| BIOMOL | DL-239 | C1(CC)(O)c(c2C1)cccc2)C3=NCCN3                                                                                                                                                                          | C13H16N2O     | 216.279  | Efaroxan                   |
| BIOMOL | DL-282 | c1(C[C@@H](C(=O)N[C@@H](CO)C(=O)N[C@@H](C(=O)N[C@@H](CO)C(C)C)C(=O)N[C@@H](CC(C)C)C(=O)N[C@@H](CCCC(=N)N)C(=O)N2CC[C@H]2C(=O)NNC(=O)N)Cc3ccc(C)cc3)NC(=O)[C@@H](NC(=O)[C@@H]4NC(=O)CC4)Cc5nc[nH]c5)[nH] | C59H84N18O14  | 1269.41  | Goserelin acetate          |
| BIOMOL | PG-007 | [C@@]1([H])([C@@H](C1C=C/C/CCCC(=O)O)C(=O)C[C@@H](O)[C@]1([H])C=C[C@@H](O)CCCCC                                                                                                                         | C20H32O5      | 352.465  | Dinoprostone               |
| BIOMOL | DL-283 | c1(O)cccc1O                                                                                                                                                                                             | C7H8O2        | 124.137  | Guaiacol                   |
| BIOMOL | DL-276 | C(=N)(N(C)C)NC(=N)N                                                                                                                                                                                     | C4H11N5       | 129.164  | Metformin                  |
| BIOMOL | GR-100 | C1(\C=C1C1(C)=C1C=C1C(\C)=C1C(=O)O)=C(C)CCCC1(C)C                                                                                                                                                       | C20H28O2      | 300.435  | Retinoic acid              |
| BIOMOL | DL-277 | c(c(Cl)c(Cl)cc1)(CN(C2=N3)CC(=O)N2)c13                                                                                                                                                                  | C10H7Cl2N3O   | 256.088  | Anagrelide                 |
| BIOMOL | GR-210 | c(c(C)c(C)c(O)c1C(O)C(C)(COc2ccc(CC3SC(=O)NC3=O)cc2)CC4)c14                                                                                                                                             | C24H27NO5S    | 441.54   | Troglitazone               |
| BIOMOL | AC-121 | N(CC1=NCCN1)(c2ccc(C)cc2)c3cccc(O)c3                                                                                                                                                                    | C17H19N3O     | 281.352  | PhentolamineHCl            |
| BIOMOL | AC-760 | c1(C(=O)NC[C@@H]2CCCN2CC)cc(S(=O)(=O)N)ccc1OC                                                                                                                                                           | C15H23N3O4S   | 341.426  | Sulpiride s (-)            |
| BIOMOL | AC-122 | c1(cc(OC)cc2)c2nccc1[C@@H](O)[C@]3([H])C[C@@]([H])(CCN34)[C@@H](C=C)C4                                                                                                                                  | C20H24N2O2    | 324.417  | Quinine                    |
| BIOMOL | AC-763 | C(OCCN(C)C)(c1cccc1)c2cccc2                                                                                                                                                                             | C17H21NO      | 255.355  | Diphenhydramine HCl        |

|        |        |                                                                                                                                                                                                                                                                                       |              |          |                                   |
|--------|--------|---------------------------------------------------------------------------------------------------------------------------------------------------------------------------------------------------------------------------------------------------------------------------------------|--------------|----------|-----------------------------------|
| BIOMOL | AC-123 | c1(Nc2cccc(C(F)(F)F)c2)cccc1C(=O)O                                                                                                                                                                                                                                                    | C14H10F3NO2  | 281.23   | Flufenamic acid                   |
| BIOMOL | AC-765 | N1(CC(C)N(C)C)C)c2c(cccc2)Sc3c1cccc3                                                                                                                                                                                                                                                  | C17H20N2S    | 284.419  | Promethazine HCl                  |
| BIOMOL | AC-124 | c1(OCC(O)CNCCC)cccc1C(=O)CCc2cccc2                                                                                                                                                                                                                                                    | C21H27NO3    | 341.444  | Propafenone                       |
| BIOMOL | AC-766 | c1(CN(C)C)ccc(CSCCN(C)NC)=C/[N+](O-)=O]o1                                                                                                                                                                                                                                             | C13H22N4O3S  | 314.404  | Ranitidine HCl                    |
| BIOMOL | AC-125 | C1(C(=O)NC(=O)N1)(c2cccc2)c3cccc3<br>[C@](CCN1CC2CC2)([C@@H]3c(c4C5)[nH]c(c46)cccc6)([C@]5O)[C@H]1<br>C7)c(c7ccc8O)c8O3                                                                                                                                                               | C15H12N2O2   | 252.268  | Phenytoin                         |
| BIOMOL | AC-770 | c1(ccc(N)cc1)C(=O)NCCN(CC)CC                                                                                                                                                                                                                                                          | C26H26N2O3   | 414.496  | Naltindole HCl                    |
| BIOMOL | AC-127 | C1(COc2c(cccc2)O)1C3=NCCN3                                                                                                                                                                                                                                                            | C13H21N3O    | 235.325  | Procainamide                      |
| BIOMOL | AC-806 | C1(COc2c(cccc2)O)1C3=NCCN3                                                                                                                                                                                                                                                            | C11H12N2O2   | 204.225  | Idazoxan                          |
| BIOMOL | AC-128 | c1(c(C)cccc1C)NC(=O)CN(CC)CC                                                                                                                                                                                                                                                          | C14H22N2O    | 234.337  | Lidocaine                         |
| BIOMOL | AC-807 | C12(CCN(CCCO(=O)c3ccc(F)cc3)CC1)C(=O)NCN2c4cccc4                                                                                                                                                                                                                                      | C23H26FN3O2  | 395.47   | Spiperone                         |
| BIOMOL | AC-130 | c1(C(=O)NCC2NCNCC2)cc(OC(C(F)(F)F)ccc1OC(C(F)(F)F                                                                                                                                                                                                                                     | C17H20F6N2O3 | 414.343  | Flecainide                        |
| BIOMOL | AC-808 | c1([C@@H](O)CN)ccc(O)c(O)c1                                                                                                                                                                                                                                                           | C8H11NO3     | 169.178  | Epinephrine-(+)-tartrate          |
| BIOMOL | AC-131 | c1(nc(C)cc(N)nc1N)C(=O)NC(=N)Nc2cccc2                                                                                                                                                                                                                                                 | C12H12ClN7O  | 305.723  | (-)                               |
| BIOMOL | AC-809 | c1(c(C)cccc1C)NC(SCCC2)=N2                                                                                                                                                                                                                                                            | C12H16N2S    | 220.334  | Phenamil                          |
| BIOMOL | AC-136 | c1(ccccc1OCC2=NCCN2)C3CC3                                                                                                                                                                                                                                                             | C13H16N2O    | 220.334  | Xylazine HCl                      |
| BIOMOL | AC-810 | c1(ccc(O)c(O)c1)[C@@H](O)CN.[C@H](O)(C(=O)O)[C@@H](O)(C(=O)O                                                                                                                                                                                                                          | C12H17NO9    | 319.265  | Cirazoline HCl                    |
| BIOMOL | DL-278 | c1(NS(=O)=O)=O)C)ccc(CCN(C)CCOc2ccc(NS(=O)(=O)C)cc2)cc1                                                                                                                                                                                                                               | C19H27N3O5S2 | 441.565  | Norepinephrine-(+)-tartrate I (-) |
| BIOMOL | GR-211 | c1(ccc(Cl)cc1)C(=O)NCCc2ccc(OC(C)(C)C(=O)O)cc2                                                                                                                                                                                                                                        | C19H20ClNO4  | 361.819  | Dofetilide                        |
| BIOMOL | DL-279 | c(c(Nc1cccc(C#C)c1)ncn2)(cc(OCOCOC)c(OCOCOC)c3)c23                                                                                                                                                                                                                                    | C22H23N3O4   | 393.436  | Bezafibrate                       |
| BIOMOL | GR243  | c1(C(=O)c2ccc(OCN3CCCCC3)cc2)c4c(cc(O)c4)sc1c5ccc(O)cc5                                                                                                                                                                                                                               | C28H27NO4S   | 473.583  | Erlotinib                         |
| BIOMOL | AC-227 | [C@H]1[C@H](O)c2cccc2)CCC[C@H](CC(=O)c3cccc3)N1C                                                                                                                                                                                                                                      | C22H27NO2    | 337.455  | Raloxifene HCl                    |
| BIOMOL | GR-301 | C([C@@](O)(CC)C(=O)O)C1(C(=N2C3=O)c4c(cc(c5n4)cccc5)C2)=C13                                                                                                                                                                                                                           | C20H16N2O4   | 348.352  | Lobeline                          |
| BIOMOL | NS-520 | c(cc(OC)cc1)(c(CNCC(=O)C)c[nH]2)c12                                                                                                                                                                                                                                                   | C13H16N2O2   | 232.278  | Camptothecin                      |
| BIOMOL | GR-305 | c(c(O)c(c1c2c(O)c(C)C(O)[C@@H]3O[C@H](C)[C@H](O)[C@H](O)[C@@H]4O[C@H](C)[C@@H](O)[C@H](O)(C4)C3)c1)C(=O)[C@@H](O)[C@@H]5O[C@H](C)[C@@H](O)[C@H](O)[C@@H]6O[C@H](C)[C@@H](O)[C@H](O)[C@@H]7O[C@H](C)[C@@H](O)<br>[C@H]1(C)C=C/C(C)C(=O)O)[C@@H](O)C[C@H](O)[C@@H]1(C)C=C[C@@H](O)CCCCC | C52H76O24    | 1085.145 | Melatonin                         |
| BIOMOL | PG-008 | c(C(=O)[C@@]1(C)O)C=O[C@H](OC)[C@@H](C)[C@@H](OC(C)=O)C<br>@H](C)[C@H](O)[C@H](C)[C@@H](O)[C@@H](C)C=C(C)C(=O)C<br>N2)(c3O)1)c(O)c(1C=N1N4CCN(C)CC4)c2c5O)c5c(O)c3C                                                                                                                   | C20H34O5     | 354.481  | Plicamycin                        |
| BIOMOL | GR-306 | c1(ccnc2c2cccc1S(=O)(=O)N3CCNCCC3                                                                                                                                                                                                                                                     | C43H58N4O12  | 822.94   | Dinoprost                         |
| BIOMOL | EI-233 | [C@H]1(c2cc(OC)c(O)c(OC)c2)[C@]3([H])[C@]([H])(CO C3=O)[C@H](O)[C@H]4[C@H](O)[C@@H](O)[C@H]5[C@H]6[C@H](CO[C@H](C)O5)O4)c6c1cc(c7c6)OCO7                                                                                                                                              | C14H17N3O2S  | 291.369  | Rifampicin                        |
| BIOMOL | GR-307 | c(C(O)CCC1)(c(N)c(c2n3)cccc2)c13                                                                                                                                                                                                                                                      | C29H32O13    | 588.557  | Fasudil                           |
| BIOMOL | C-106  | [C@@](O)(C)[C@]1([H])[C@@]([H])(N1)C2([C@H](CO(C)=O)N)C(=C34)C(=O)C)N=C(C)C3=O)N24                                                                                                                                                                                                    | C13H14N2O    | 214.263  | Etoposide                         |
| BIOMOL | GR-311 | N1(CC#CCN2CCCC2)CCCC1=O                                                                                                                                                                                                                                                               | C15H18N4O5   | 334.327  | Hydroxytacrine maleate            |
| BIOMOL | C-109  | n1([C@@H]2O[C@H](CO)[C@@H](NC(=O)[C@@H](N)Cc3ccc(OC)cc3)[C@H]2O)cnc4c1ncnc4N(C)C                                                                                                                                                                                                      | C12H18N2O    | 206.284  | Mitomycin c                       |
| BIOMOL | GR-312 | c(cccc1)(nc(c2c3N)CCCC2)c13                                                                                                                                                                                                                                                           | C22H29N7O5   | 471.51   | Oxotremorine sesquifumarate       |
| BIOMOL | C-110  | c1(ncccc1NC(C)C)N2CCN(C(=O)c3[nH]c(c4c3)ccc(NS(=O)(=O)C)c4)CC2                                                                                                                                                                                                                        | C13H14N2     | 198.264  | Puromycin 2HCl                    |
| BIOMOL | GR-314 | c1(OCC[N+](CC)(CC)CC)c(OC[CN+](CC)(CC)CC)cccc1OCC[N+](CC)(CC)CC                                                                                                                                                                                                                       | C22H28N6O3S  | 456.561  | Tacrine HCl                       |
| BIOMOL | C-112  | 13                                                                                                                                                                                                                                                                                    | C30H60N3O3   | 510.816  | Delavirdine mesylate              |
| BIOMOL | GR-316 | 13                                                                                                                                                                                                                                                                                    | C20H16N2O5   | 364.351  | Gallamine triethiodide            |
| BIOMOL | AC-138 | c1(CC2=NCCN2)c(C)cc(C(C)(C)C)c(O)c1C<br>C1(N2CCN(CCOCCO)CC2)=Nc3c(cccc3)Sc4c1cccc4.C5(N6CCN(CCOCCO)CC6)=Nc7c(cccc7)Sc8c5cccc8.C(/(C(=O)O)C=Cl(C)=O)O                                                                                                                                  | C16H24N2O    | 260.375  | 10-hydroxycamptothecin            |
| BIOMOL | DL-557 | C1(CCN(C)C)C(O)c2ccc(O)cc2)CC1)Cc3cccc3                                                                                                                                                                                                                                               | C46H54N6O8S2 | 883.086  | Oxymetazoline HCl                 |
| BIOMOL | AC-142 | c1(OCC(O)CN(C)C)cccc1CC=C                                                                                                                                                                                                                                                             | C21H27NO2    | 325.445  | Quetiapine fumarate               |
| BIOMOL | AC-812 | c1(cccc2)c2cccc1OCC(O)CN3CCN(c4cccc4OC)CC3                                                                                                                                                                                                                                            | C15H23NO2    | 249.349  | Ifenprodil                        |
| BIOMOL | AC-144 | N1(CCCN(C)C)c2c(cccc2)CCc3c1cccc3                                                                                                                                                                                                                                                     | C24H28N2O3   | 392.491  | Alprenolol HCl                    |
| BIOMOL | AC-813 | N1(CCCN(C)C)c2c(cccc2)CCc3c1cccc3                                                                                                                                                                                                                                                     | C19H24N2     | 280.407  | Naftopidil 2HCl                   |
| BIOMOL | AC-146 | c(cc(OC)c(OC)c1)(c(N)nc(N2CCN(C(=O)c3cccc3)CC2)n4)c14                                                                                                                                                                                                                                 | C19H21N5O4   | 383.401  | Imipramine HCl                    |
| BIOMOL | AC-814 | C1(N2CCNCC2)=Nc3c(cccc3)Oc4c1cc(Cl)cc4                                                                                                                                                                                                                                                | C17H16ClN3O  | 313.781  | Prazosin HCl                      |
| BIOMOL | AC-152 | c1(c(Cl)cccc1Cl)NC2=NCCN2                                                                                                                                                                                                                                                             | C9H9Cl2N3    | 230.094  | Amoxapine                         |
| BIOMOL | AC-152 | c1(c(Cl)cccc1Cl)NC2=NCCN2                                                                                                                                                                                                                                                             | C9H9Cl2N3    | 230.094  | Clonidine HCl                     |

|        |        |                                                                                                                                        |                |         |                                |
|--------|--------|----------------------------------------------------------------------------------------------------------------------------------------|----------------|---------|--------------------------------|
| BIOMOL | AC-834 | <chem>c(c1n(C)c2)(c2C[C@]3([H])[C@]4([H])C[C@H](NS(=O)(=O)N(C)C)CN3C)c4ccc1</chem>                                                     | C18H26N4O2S    | 362.49  | Mesulergine HCl                |
| BIOMOL | AC-153 | <chem>c1(\C=N\N(C)=N)N)c(Cl)cccc1Cl</chem>                                                                                             | C8H8Cl2N4      | 231.082 | Guanabenz acetate              |
| BIOMOL | DL-558 | <chem>c1(cccc(Cl)c1)C(=O)C(C)NC(C)(C)C</chem>                                                                                          | C13H18ClNO     | 239.741 | Amfebutamone                   |
| BIOMOL | AC-154 | <chem>C(NC(OCC1)=N1)(C2CC2)C3CC3</chem>                                                                                                | C10H16N2O      | 180.247 | Rilmenidine hemifumarate       |
| BIOMOL | AC-840 | <chem>c1(C(=O)NCCN(CC)CC)cc(Cl)c(N)cc1OC</chem>                                                                                        | C14H22ClN3O2   | 299.796 | Metoclopramide HCl             |
| BIOMOL | AC-160 | <chem>C12(CCN(C3COc4c(cccc4)O3)CC1)C(=O)NCCN2c5cccc5</chem>                                                                            | C22H25N3O3     | 379.452 | Spiroaxtrine                   |
| BIOMOL | AC-858 | <chem>[C@]1([C@]2(O)[C@]([H])(C3)N(CC4CC4)CC1)([C@]5([H])c(c6C2)oc(c67)cccc7)c(c38)c(c(O)cc8)O5</chem>                                 | C26H25NO4      | 415.481 | Naltriben mesylate             |
| BIOMOL | AC-161 | <chem>c1([nH]c(c23)cccc2)c3CCN4[C@]1([H])C[C@]([H])([C@]5([H])C4)[C@]([H])(C(=O)O)C)[C@]([H])(O)CC5</chem>                             | C21H26N2O3     | 354.443 | Yohimbine HCl                  |
| BIOMOL | DL-124 | <chem>C(C(C1)(C)(\C=C\Cl(C)=ClC=Cl(C)\C=ClCO(C)=O)C)=C(C)CC1</chem>                                                                    | C22H32O2       | 328.488 | Vitamin a (acetate)            |
| BIOMOL | AC-164 | <chem>[C@](O)(O)[C@]([C](N(C)=O)[C@H]1CN(C)[C@]([H])(C2C1)Cc3c(c4[nH]c3)c2ccc4)C5=O)[C@]6([H])N(CCC6)C(=O)[C@]7C8cccc8)N57</chem>      | C33H37N5O5     | 583.677 | Dihydroergotamine mesylate     |
| BIOMOL | AC-891 | <chem>[C@]([CCCC1)(c2c(ccc(O)c2)C3)(CCN4C=ClC)[C@]1([H])[C@]([H])34</chem>                                                             | C19H25NO       | 283.408 | Levallorphan tartrate          |
| BIOMOL | C-115  | <chem>[C@]([C]=C[C@H](O)C1)[C@H]1O2)(CCN(C)C3)c(c3ccc4OC)c24</chem>                                                                    | C17H21NO3      | 287.354 | Galanthamine HBr               |
| BIOMOL | GR-318 | <chem>c12c(c(O)c3c([C@]([H])(O)[C@H]4C[C@H](N)[C@H](O)[C@H](C)O4)C[C@](O)(O)(C(C)=O)C3)c1O)C(=O)c5c(c(O)C)ccc5)C2=O</chem>             | C27H29NO10     | 527.52  | Daunorubicin HCl               |
| BIOMOL | CA-200 | <chem>c1(nc(Cl)c(N)nc1N)C(=O)NC(=N)N</chem>                                                                                            | C6H8ClN7O      | 229.627 | Amiloride                      |
| BIOMOL | GR-319 | <chem>c(c(O)c1c(C(=O)c2c(cccc2OC)C1=O)c3O)(C[C@]([O])(C(=O)CO)C[C@]([H])4O[C@]([H])5O[C@]([H])(C)[C@]([H])(O)[C@]([H])(N)C5)c34</chem> | C27H29NO11     | 543.519 | Doxorubicin HCl                |
| BIOMOL | CA-202 | <chem>C1(c2cccc2Cl)C(=O)OC(=O)C(=O)NC(COCCN)=C1C(=O)OCC</chem>                                                                         | C20H25ClN2O5   | 408.876 | Amlodipine                     |
| BIOMOL | GR336  | <chem>c(c1c(C(C)(C)CCC1)cc2)(C(=O)C(=O)c3c4ccc3)c24</chem>                                                                             | C19H18O3       | 294.344 | Tanshinone iia                 |
| BIOMOL | CA-205 | <chem>[C@]([H])1(c2ccc(O)C)cc2)Sc3c(cccc3N(CCN(C)C)C(=O)[C@]([H])1OC(=O)C</chem>                                                       | C22H26N2O4S    | 414.518 | Diltiazem                      |
| BIOMOL | DL-284 | <chem>c1(Nc2ccc(OCc3cccc(F)c3)c(Cl)c2)ncnc4c1cc(c5ccc(CNCCS(C(=O)=O)O)O5)cc4</chem>                                                    | C29H26ClFN4O4S | 581.058 | Lapatinib                      |
| BIOMOL | CA-210 | <chem>C1(C(C(=O)OC)=C(C)NC(C)=C1C(=O)OC)c2cccc2[N+][([O-])=O</chem>                                                                    | C17H18N2O6     | 346.335 | Nifedipine                     |
| BIOMOL | DL-285 | <chem>c1(C(=O)OC)cccc1O</chem>                                                                                                         | C8H8O3         | 152.147 | Methyl salicylate              |
| BIOMOL | CA-211 | <chem>C1(C(C(=O)OC(C)C)=C(C)NC(C)=C1C(=O)OCCOC)c2cccc([N+][([O-])=O)c2</chem>                                                          | C21H26N2O7     | 418.44  | Nimodipine                     |
| BIOMOL | GR-240 | <chem>C1(S(C(=O)NC1=O)Cc2ccc(OCc3ncc(CC)cc3)cc2</chem>                                                                                 | C19H20N2O3S    | 356.439 | Pioglitazone                   |
| BIOMOL | CA-212 | <chem>C1(c2cccc([N+][([O-])=O)c2)C(C(=O)OC)=C(C)NC(C)=C1C(=O)OCC</chem>                                                                | C18H20N2O6     | 360.361 | Nitrendipine                   |
| BIOMOL | DL-287 | <chem>5</chem>                                                                                                                         | C27H23N5O4     | 481.503 | Pranlukast                     |
| BIOMOL | CA-215 | <chem>C(C#N)(C(C)C)(CCCN(C)CCc1ccc(OC)c(O)c1)c2ccc(OC)c(O)c2</chem>                                                                    | C27H38N2O4     | 454.602 | Verapamil                      |
| BIOMOL | DL-288 | <chem>c1(O(C(=O)N(C)C)CC)cccc([C@]([H])(N(C)C)C)c1</chem>                                                                              | C14H22N2O2     | 250.337 | Rivastigmine                   |
| BIOMOL | CA-216 | <chem>C1(CCN(CCCOC(=O)C2=C(C)NC(C)=C(C(=O)OC)C2c3cccc([N+][([O-])=O)c3)CC1)(c4cccc4)c5cccc5</chem>                                     | C36H39N3O6     | 609.711 | Niguldipine HCl                |
| BIOMOL | DL-289 | <chem>C(c1ccc(S(=O)(=O)C)cc1)(COC2=O)=C2c3cccc3</chem>                                                                                 | C17H14O4S      | 314.356 | Rofecoxib                      |
| BIOMOL | CA-225 | <chem>C(c1ccc(F)cc1)(c2ccc(F)cc2)N3CCN(ClC=C1c4cccc4)CC3</chem>                                                                        | C26H26F2N2     | 404.495 | Flunarizine-2HCl               |
| BIOMOL | DL-236 | <chem>[C@](O)(O)[C@]([C](N(C)=O)[C@H]1CN(C)[C@]([H])(C2=C1)[H])Cc3c(c4[nH]c3)c2ccc4)C5=O)[C@]6([H])N(CCC6)C(=O)[C@]7C8cccc8)N57</chem> | C33H35N5O5     | 581.662 | Ergotamine D-tartrate          |
| BIOMOL | AC-165 | <chem>[C@]1([OC])[C[C@]([H])(CO(C=O)c2cnc(Br)c2)CN3C)[C@]3([H])Cc4c(c5n(C)c4)c1ccc5</chem>                                             | C24H26BrN3O3   | 484.386 | Nicergoline                    |
| BIOMOL | AC-893 | <chem>[C@]([CCN1CC2CCC2)([C@]([H])3[C@]([H])(O)CC4)([C@]4(O)[C@]([H])1C5)c(c5ccc6O)c6O3</chem>                                         | C21H27NO4      | 357.443 | Nalbuphine HCl                 |
| BIOMOL | DL-564 | <chem>[C@H]1(CS[C@H](CO)O1)N2C=C(F)C(N)=NC2=O</chem>                                                                                   | C8H10FN3O3S    | 247.247 | Emtricitabine                  |
| BIOMOL | AC-911 | <chem>[N+](C)(C)(C)CCOC(=O)N</chem>                                                                                                    | C6H15N2O2      | 147.195 | Carbamylcholine Cl             |
| BIOMOL | AC-169 | <chem>c1(OCC(O)CNC(C)C)ccc(CCOCC2CC2)cc1</chem>                                                                                        | C18H29NO3      | 307.428 | Betaxolol HCl                  |
| BIOMOL | AC-912 | <chem>C(C(C)OC(=O)N)[N+](C)(C)C</chem>                                                                                                 | C7H17N2O2      | 161.222 | Carbamyl-beta-methylcholine Cl |
| BIOMOL | AC-171 | <chem>c1(OCC(O)CNC(C)C)ccc(NC(=O)C)cc1</chem>                                                                                          | C14H22N2O3     | 266.336 | Practolol                      |
| BIOMOL | AC-915 | <chem>C(COC(=O)CCC)[N+](C)(C)C</chem>                                                                                                  | C9H20NO2       | 174.261 | Butyrylcholine Cl              |
| BIOMOL | AC-172 | <chem>c1(N2CCOCC2)nsnc1OC[C@]([H])(O)CNC(C)(C)C</chem>                                                                                 | C13H24N4O3S    | 316.42  | Timolol maleate (s)            |
| BIOMOL | AC-925 | <chem>c1(N=C(N)/N)sc(CSCCC(=N)NS(=O)(=O)N)n1</chem>                                                                                    | C8H15N7O2S3    | 337.445 | Famotidine                     |
| BIOMOL | AC-173 | <chem>N1(CCOCC1)C(=O)NCCNCC(O)COc2ccc(O)cc2</chem>                                                                                     | C16H25N3O5     | 339.387 | Xamoterol hemifumarate         |
| BIOMOL | AC-928 | <chem>C(O)(c1cccc1)(c2cccc2)C3CCN(CCCC(O)c4ccc(C(C)(C)C)cc4)CC3</chem>                                                                 | C32H41NO2      | 471.673 | Terfenadine                    |
| BIOMOL | AC-174 | <chem>C(C)(C)(C)NCC(O)c1cc(Cl)c(N)c(Cl)c1</chem>                                                                                       | C12H18Cl2N2O   | 277.19  | Clenbuterol                    |
| BIOMOL | AC-986 | <chem>c1(ccncc1)C(=O)NN</chem>                                                                                                         | C6H7N3O        | 137.139 | Isoniazid                      |
| BIOMOL | AC-175 | <chem>c1(C=CC(=O)N2)c2c(O)ccc1[C@]([H])(O)[C@H](CC)NC(C)C</chem>                                                                       | C16H22N2O3     | 290.357 | Procaterol hcl                 |

|        |        |                                                                                                                                                                                                            |               |         |                      |
|--------|--------|------------------------------------------------------------------------------------------------------------------------------------------------------------------------------------------------------------|---------------|---------|----------------------|
| BIOMOL | AC-993 | c(ccs1)(CN(Cc2ccccc2Cl)CC3)c13                                                                                                                                                                             | C14H14ClNS    | 263.786 | Ticlopidine HCl      |
| BIOMOL | AC-176 | c1(C(O)CNC(C)(C)C)ccc(O)c(CO)c1                                                                                                                                                                            | C13H21NO3     | 239.311 | Salbutamol sulfate   |
| BIOMOL | DL-246 | c1(CC(C)CN2[C@@H](C)O[C@@H](C)C2)ccc(C(C)(C)CC)cc1                                                                                                                                                         | C21H35NO      | 317.509 | Amorolfine           |
| BIOMOL | AC-181 | c(c(OCC(C)CNC(C)C)ccc1)(cc[nH]2)c12                                                                                                                                                                        | C14H20N2O2    | 248.321 | Pindolol             |
| BIOMOL | DL-247 | [C@@](C)(OCC[C@H]1CCCN1C)(c2ccccc2)c3ccc(Cl)cc3                                                                                                                                                            | C21H26ClNO    | 343.89  | Clemastine fumarate  |
| BIOMOL | CA-234 | C1(CN)(CCCCC1)CC(O)=O                                                                                                                                                                                      | C9H17NO2      | 171.237 | Gabapentin           |
| BIOMOL | DL-291 | c(ccc(F)c1)(\C(=Cl)c2ccc(S(=O)(=O)C)cc2)\C(C)=C3CC(=O)O)c13                                                                                                                                                | C20H17FO3S    | 356.411 | Sulindac             |
| BIOMOL | CA-236 | C1(C(C(=O)O)C)=C(C)NC(C)=C1C(=O)OCCc2ccccc(Cl)c2Cl                                                                                                                                                         | C18H19Cl2NO4  | 384.254 | Felodipine           |
| BIOMOL | DL-292 | C(C(=O)O)(CCC)CCC<br>C1(c2ccccc([N+])([O-]))=O)c2(C(=O)O)CCO=C(C)C(C)C(C)=C1C(=O)OCCc2ccccc3                                                                                                               | C8H16O2       | 144.211 | Valproic acid        |
| BIOMOL | CA-237 | ]=O)c2(C(=O)O)CCO=C(C)C(C)C(C)=C1C(=O)OCCc2ccccc3                                                                                                                                                          | C27H28N2O7    | 492.52  | Cilnidipine          |
| BIOMOL | DL-547 | [C@@]([H])(\C(=Cl)C=C(Cl)C[C@@H](O)C[C@@H]1O)/C1=C(C)\CCC2)(CC[C@H]3[C@@H](C)C=C(Cl)[C@@H](O)C4CC4)[C@]23C                                                                                                 | C27H40O3      | 412.605 | Calcipotriene        |
| BIOMOL | CA-305 | c1(cccccc1)CN(CCC)C(C)COc2ccccc2<br>c1(cc(NC(=O)O)C2CCCC2)cc3c3n(C)cc1Cc4ccc(C(=O)NS(=O)(=O)c5ccccc5C)cc4OC                                                                                                | C18H22ClNO    | 303.826 | Phenoxybenzamine HCl |
| BIOMOL | DL-294 |                                                                                                                                                                                                            | C31H33N3O6S   | 575.675 | Zafirlukast          |
| BIOMOL | CA-310 | c1(cc(C(F)(F)F)cc2)c2Sc3c(cccc3)N1CCCN4CCN(C)CC4                                                                                                                                                           | C21H24F3N3S   | 407.496 | Trifluoperazine      |
| BIOMOL | DL-295 | c1(sc(c2c1)cccc2)C(C)N(O)C(=O)N                                                                                                                                                                            | C11H12N2O2S   | 236.29  | Zileuton             |
| BIOMOL | DL-218 | c(n(CC(=O)O)cn1)(C(=O)N(CCCC)C(=O)N2CCCC)c12                                                                                                                                                               | C16H24N4O3    | 320.387 | Denbufylline         |
| BIOMOL | PR-118 | c1(C(=N)N)ccc(OCCCCCOc2ccc(C(=N)N)cc2)cc1                                                                                                                                                                  | C19H24N4O2    | 340.419 | Pentamidine          |
| BIOMOL | DL-131 | O(CCCCCCCCCCCCCCCC)P([O-])(=O)OCC[N+](C)(C)C                                                                                                                                                               | C21H46NO4P    | 407.568 | Miltefosine          |
| BIOMOL | DL-297 | C(=O)([C@H](Cc1ccccc1)NC(=O)c2cncn2)N[C@H](CC(C)C)B(O)O<br>[C@H]1(C)C=C/C(CCC(=O)O)C(C)C[C@@H](O)C[C@@H](O)C[C@@H]1C<br>C[C@@H](O)CCc2ccccc2                                                               | C19H25BN4O4   | 384.237 | Bortezomib           |
| BIOMOL | DL-281 |                                                                                                                                                                                                            | C26H40O5      | 432.593 | Latanoprost          |
| BIOMOL | DL-161 | C(C)(C)(C)NCC(O)c1cc(O)C(=O)N(C)C)cc(O)C(=O)N(C)C)c1<br>[C@@]1(CO)([C@H](O)C[C@H](O)[C@@H]2O[C@@H](C)[C@H](O)C[C@@H](O)[C@H]2O)C3[C@@H](O)C[C@H]4([H])([C@@]1([C@H](O)C[C@@H]5C6=CC(=O)O)C6)[H]            | C18H29N3O5    | 367.44  | Bambuterol           |
| BIOMOL | CM-109 |                                                                                                                                                                                                            | C29H44O12     | 584.652 | Ouabain              |
| BIOMOL | DL-186 | c1(c2ccc(Cl)cc2)nc(c3ccccc3)sc1CC(=O)O                                                                                                                                                                     | C17H12ClNO2S  | 329.801 | Fentiazac            |
| BIOMOL | CM-112 | c1(C(=O)NN2[C@H](C)CC[C@@H]2C)ccc(C)(S(=O)(=O)N)c1                                                                                                                                                         | C14H20ClN3O3S | 345.845 | Clopidamide          |
| BIOMOL | J120   | C1(CC)NC(=O)N(C)C1=O)c2ccccc2                                                                                                                                                                              | C12H14N2O2    | 218.252 | Mephénytoin          |
| BIOMOL | AC-183 | c1(C(O)CNC(C)C)ccc(N)c(C#N)c1                                                                                                                                                                              | C12H17N3O     | 219.283 | Cimaterol            |
| BIOMOL | DL-248 | O                                                                                                                                                                                                          | C23H32N6O4S   | 488.603 | Vardenafil           |
| BIOMOL | AC-185 | c1(CCNC(C)CCc2ccc(O)cc2)ccc(O)c(O)c1                                                                                                                                                                       | C18H23NO3     | 301.38  | Dobutamine HCl       |
| BIOMOL | DL-249 | N1(C(=O)O)[C@@H](CNC(=O)C)C1)c2ccc(N3CCOCC3)c(F)c2                                                                                                                                                         | C16H20FN3O4   | 337.346 | Linezolid            |
| BIOMOL | AC-189 | c(cccc1)(cc(C)O)CNC(C)C)cc2c12<br>[C@]1(O)C(=O)C(CO2)[C@@]2([H])C[C@H](O)[C@@](C)([C@@]13[H])C(=O)[C@H](O)C(=C4C)C(C)C[C@@](O)(C[C@@H]4O)C(=O)[C@H](O)C[C@@H](NC(=O)O)C(C)C)c5ccccc5[C@@H]3O)C(=O)c6ccccc6 | C15H19NO      | 229.317 | Pronethalol HCl      |
| BIOMOL | DL-250 |                                                                                                                                                                                                            | C43H53NO14    | 807.879 | Docetaxil            |
| BIOMOL | AC-192 | c1(ccc(NS(=O)(=O)C)cc1)C(O)CNC(C)C                                                                                                                                                                         | C12H20N2O3S   | 272.364 | Sotalol HCl          |
| BIOMOL | DL-251 | c(cc(C(C(=O)O)cc1)(c1O)C2)C=C/C(CCN(C)C)c(cccc3)c23                                                                                                                                                        | C21H23NO3     | 337.412 | Olopatadine          |
| BIOMOL | AR-111 | [C@@](CCCNC)(CC1)(c2c3ccccc2)c(cccc4)c4[C@@]13[H]<br>C1(c2ccccc([N+])([O-]))=O)c2(C(=O)O)C(=O)C(C)NC(C)=C1C(=O)OCCN3CCN(C(c4ccccc4)c5ccc5)CC3                                                              | C20H23N       | 277.403 | Maprotiline HCl      |
| BIOMOL | DL-258 |                                                                                                                                                                                                            | C35H38N4O6    | 610.699 | Manidipine           |
| BIOMOL | AC-194 | C(CNC)(O)c1ccccc1OC)c2ccccc2                                                                                                                                                                               | C17H21NO2     | 271.354 | Nisoxetine HCl       |
| BIOMOL | DL-252 | c1(cc(O)c(O)c([N+])([O-])=O)c1C(=O)c2ccc(C)cc2<br>C1(\C=C(Cl)C(\C)=ClC=Cl(C)C(\C)=ClC=C(Cl)C)/C)C=C(Cl)C=C(Cl)C2=C(C)C(=O)CCC2(C)C(=O)C(C)C(=O)CCC1(C)C                                                    | C14H11NO5     | 273.241 | Tolcapone            |
| BIOMOL | DL-553 | [C@](CC)([C@](O)(C#C)CC1)(C=CC(=C(CCC2=O)C3=C2)[C@@]4([H])C3)[C@@]14[H]                                                                                                                                    | C40H52O2      | 564.84  | Canthaxanthin        |
| BIOMOL | DL-253 |                                                                                                                                                                                                            | C21H24O2      | 308.414 | Gestrinone           |
| BIOMOL | AC-214 | [C@H]1(Cc2cncn2C)CO(C(=O)[C@H]1CC<br>c1(C(=O)OCC(O)C(=O)O2)=C2C)c(C(C)C)O)nc(CCC)n1Cc3ccc(c4ccccc4c5nn[nH]5)cc3                                                                                            | C11H16N2O2    | 208.257 | Pilocarpine HCl      |
| BIOMOL | DL-254 |                                                                                                                                                                                                            | C29H30N6O6    | 558.585 | Olmesartan           |
| BIOMOL | AC-218 | [C@@]([H])(CC1)(C[C@H](OC(=O)C(CO)c2ccccc2)C3)[N+](C)(C)C)[C@@]13[H]                                                                                                                                       | C20H30NO3     | 332.457 | Ipratropium Br       |
| BIOMOL | DL-255 | C1(C(C(=O)O)C)=C(C)NC(C)=C1C(=O)OCC(C)C)c2ccccc2[N+])([O-])=O                                                                                                                                              | C20H24N2O6    | 388.414 | Nisoldipine          |
| BIOMOL | AC-220 | N1(C(=O)CN2CCN(C)CC2)c3c(ccccc3)C(=O)Nc4c1cccc4<br>C1(C(C(=O)O)CC)=C(C)NC(C)=C1C(=O)OCC)c2ccccc2)C=C(Cl)C(=O)O)C(C)C                                                                                       | C19H21N5O2    | 351.402 | Pirenzepine 2HCl     |
| BIOMOL | DL-256 |                                                                                                                                                                                                            | C26H33NO6     | 455.543 | Lacidipine           |
| BIOMOL | CN-244 | [N+](N-1)(=Cl)C(O)N=N(C(=O)OCC)N2CCOCC2                                                                                                                                                                    | C9H14N4O4     | 242.232 | Molsidomine          |

|        |        |                                                                                                                                                                                                                                                                                                                 |               |         |                        |
|--------|--------|-----------------------------------------------------------------------------------------------------------------------------------------------------------------------------------------------------------------------------------------------------------------------------------------------------------------|---------------|---------|------------------------|
| BIOMOL | KC-115 | c(ccc(Cl)c1)(N=C(C)NS2(=O)=O)c12                                                                                                                                                                                                                                                                                | C8H7ClN2O2S   | 230.671 | Diazoxide              |
| BIOMOL | CR110  | c1(ccccc2)c2n(CCN3CCOCC3)c(C)c1C(=O)c4ccc(OC)cc4                                                                                                                                                                                                                                                                | C23H26N2O3    | 378.464 | Pravastatin            |
| BIOMOL | KC-120 | c1(C(=O)NCCc2ccc(S(=O)(=O)NC(=O)NC3CCCC3)cc2)cc(Cl)ccc1OC                                                                                                                                                                                                                                                       | C23H28ClN3O5S | 494.004 | Glyburide              |
| BIOMOL | CT110  | c1(NC(=O))C=Cc2ccc(OC)c(OC)c2cccc1C(=O)O                                                                                                                                                                                                                                                                        | C18H17NO5     | 327.331 | Tranilast              |
| BIOMOL | KC-125 | C1(=NC(=N)N(O)C(N)=C1)N2CCCC2                                                                                                                                                                                                                                                                                   | C9H15N5O      | 209.248 | Minoxidil              |
| BIOMOL | CT115  | c(c(O)ccc1O)(C(=O)C)[C@H](O)C1C=C(Cl)/C)=CC2=O)c12                                                                                                                                                                                                                                                              | C16H16O5      | 288.295 | Shikonin               |
| BIOMOL | KC-135 | S(=O)(=O)(NC(=O)NN1CCCCC1)c2ccc(C)cc2<br>N(C(=O)[C@](C(C)C)(NC(=O)[C@H]1CN(C)C(C2=C1)Cc3c(c4[nH]c3Br)c2<br>ccc4)O5)[C@@H](CC(C)C)C(=O)N6[C@@]7([H])CCC6)[C@@]57O                                                                                                                                                | C14H21N3O3S   | 311.4   | Tolazamide             |
| BIOMOL | D-102  | c1(ncccc1)C(=O)NCCO[N+](=[O-])=O                                                                                                                                                                                                                                                                                | C32H40BrN5O5  | 654.595 | Bromocriptine mesylate |
| BIOMOL | KC-152 | c1(ncccc1)C(=O)NCCO[N+](=[O-])=O                                                                                                                                                                                                                                                                                | C8H9N3O4      | 211.175 | Nicorandil             |
| BIOMOL | D-107  | C1(N2CCN(C)CC2)=Nc3c(ccc(Cl)c3)Nc4c1cccc4                                                                                                                                                                                                                                                                       | C18H19ClN4    | 326.823 | Clozapine              |
| BIOMOL | DL-298 | c(cc(C(=O)c1ccc(C(=O)O)cc1)c(C)c2)(C(C)(C)CCC(C)C)c23                                                                                                                                                                                                                                                           | C24H28O2      | 348.478 | Bexarotene             |
| BIOMOL | D-108  | C1(N2CCN(C)CC2)=Nc3c(cccc3)Sc4c1cc(Cl)cc4                                                                                                                                                                                                                                                                       | C18H18ClN3S   | 343.874 | Clothiapine            |
| BIOMOL | DL-221 | c1(ccc(OC)cc1)C(=O)C(Cl)Br=C(Cl)=O                                                                                                                                                                                                                                                                              | C11H9BrO4     | 285.091 | Brometric acid         |
| BIOMOL | D-109  | [C@@]1([H])([H])(CCC)CCC1)(Cc(c2C3)c[nH]n2)[C@]13[H]                                                                                                                                                                                                                                                            | C13H21N3      | 219.326 | Quinpirole HCl (-)     |
| BIOMOL | DL-299 | n1(c2ccc(S(=O)(=O)N)cc2)nc(C(F)F)cc1c3ccc(C)cc3                                                                                                                                                                                                                                                                 | C17H14F3N3O2S | 381.372 | Celecoxib              |
| BIOMOL | D-111  | c1(C(=O)NC[C@@H]2CCCN2CC)c(O)ccc(Br)c1OC                                                                                                                                                                                                                                                                        | C16H23BrN2O3  | 371.269 | Remoxipride            |
| BIOMOL | DL-172 | N1(CCCC1=O)[C@@H](CC)C(=O)N<br>[C@](C)([C@@H]([C@H](C)CCCC(O)(C)C)CC1)(CC2)[C@]1([H])C(Cl)C2=<br>ClC=C(Cl)C[C@@H](O)CC3)/C3=C                                                                                                                                                                                   | C8H14N2O2     | 170.209 | Levetiracetam          |
| BIOMOL | DM100  | C(n1ncnc1)(c2ccc(C#N)cc2)c3ccc(C#N)cc3                                                                                                                                                                                                                                                                          | C27H44O2      | 400.637 | Calcifediol            |
| BIOMOL | DL-300 | C(n1ncnc1)(c2ccc(C#N)cc2)c3ccc(C#N)cc3                                                                                                                                                                                                                                                                          | C17H11N5      | 285.303 | Letrozole              |
| BIOMOL | AC-221 | N1(C(=O)CN2CCN(C)CC2)c3c(cccc3)NC(=O)c4c1c(C)sc4                                                                                                                                                                                                                                                                | C19H22N4O2S   | 370.469 | Telenzepine 2HCl       |
| BIOMOL | DL-257 | C1(N2CCN(C)CC2)=Nc3c(cccc3)Nc4c1cc(C)sc4                                                                                                                                                                                                                                                                        | C17H20N4S     | 312.432 | Olanzapine             |
| BIOMOL | AC-222 | C(CO)(C(=O)N(CC)Cc1cncnc1)c2cccc2<br>[C@]1([H])([C@@H](CC[C@H]2O(C(=O)C[C@H](O)C2)[C@@H](C)C=C3)<br>C3=C[C@H](C)C[C@@H]1O(C(=O)[C@@H](C)CC<br>[C@]1([H])([C@H](C)[C@@H]([N+](=O)C)CCCC2)[C@@H]3O(C(=O)C)[C@]3(C)CC[C@<br>@]4([H])([C@@]1([H])CC[C@]5([H])([C@]4(C)C[C@H]([N+](=O)C)CCCC6<br>)[C@@H](O(C(=O)C)C5 | C17H20N2O2    | 284.353 | Tropicamide            |
| BIOMOL | G-226  | C3=C[C@H](C)C[C@@H]1O(C(=O)[C@@H](C)CC<br>[C@]1([H])([C@H](C)[C@@H]([N+](=O)C)CCCC2)[C@@H]3O(C(=O)C)[C@]3(C)CC[C@<br>@]4([H])([C@@]1([H])CC[C@]5([H])([C@]4(C)C[C@H]([N+](=O)C)CCCC6<br>)[C@@H](O(C(=O)C)C5                                                                                                     | C24H36O5      | 404.54  | Lovastatin             |
| BIOMOL | AC-232 | c1(nnc(N)nc1N)c2cccc(Cl)c2Cl                                                                                                                                                                                                                                                                                    | C35H60N2O4    | 572.862 | Pancuronium Br         |
| BIOMOL | NA-137 | c1(nnc(N)nc1N)c2cccc(Cl)c2Cl<br>[C@@](O)([C@@H]1C(=O)O[C@H]2C[C@H](O[C@@]3(CC[C@H](C)[C@<br>@]([H])([C@@H](C)CC)O3)C2)ClC=C(Cl)/C)[C@H]4O[C@@H]5O[C@@<br>H](C)[C@H](O)[C@@H]6O[C@@H](C)[C@H](O)[C@@H](O)C6)[C@@<br>H](O)C5)\Cl=C(Cl)C[C@@H]4C)CO7[                                                              | C9H7Cl2N5     | 256.091 | Lamotrigine            |
| BIOMOL | AC-238 | c1(ccc(O)cc1)C(O)CNC(C)CCc2ccc(O)cc2                                                                                                                                                                                                                                                                            | C48H74O14     | 875.093 | Ivermectin             |
| BIOMOL | DL-260 | c1(ccc(O)cc1)C(O)CNC(C)CCc2ccc(O)cc2                                                                                                                                                                                                                                                                            | C18H23NO3     | 301.38  | Ractopamine            |
| BIOMOL | AC-241 | [C@]1(C)(CCN2C)[C@@]2([H])N(C)c3c1cc(OC(=O)NC)cc3                                                                                                                                                                                                                                                               | C15H21N3O2    | 275.346 | Physostigmine sulfate  |
| BIOMOL | DL-261 | c1(cc(S(=O)(=O)N2CCN(C)CC2)ccc1OCC)C(NC(=O)c3c4c(CCC)nn3C)=N4                                                                                                                                                                                                                                                   | C22H30N6O4S   | 474.576 | Sildenafil             |
| BIOMOL | DL-554 | c1(ccncnc1)C(=O)NCCCC(=O)Nc2ccccc2                                                                                                                                                                                                                                                                              | C16H18N4O2    | 298.34  | Nialamide              |
| BIOMOL | DL-262 | [C@H]1(CC[C@H]([C@@H](c2ccc(Cl)cc2)CC1)C3=C(O)C(=O)c4c(cccc4)C3=O                                                                                                                                                                                                                                               | C22H19ClO3    | 366.837 | Atovaquone             |
| BIOMOL | AC-250 | c1(ccc(Cl)cc1)C2(O)CCN(CCCC(=O)c3ccc(F)cc3)CC2                                                                                                                                                                                                                                                                  | C21H23ClFNO2  | 375.864 | Haloperidol HCl        |
| BIOMOL | DL-208 | c(cccc1Cl)(c(COC(Cn2cnc2)c3ccc(Cl)cc3Cl)cs4)c14                                                                                                                                                                                                                                                                 | C20H15Cl3N2O5 | 437.77  | Sertaconazole          |
| BIOMOL | AC-259 | c(OCO1)(cc(CN2CCN(c3nccn3)CC2)cc4)c14<br>N(C)C([O-])=O=C(C[N+](=O)C)CCCC1CS2)(C(=O)[C@H]3NC(=O)C(=N/OC)\c4nc(N)<br>sc4)[C@H]23                                                                                                                                                                                  | C16H18N4O2    | 298.34  | Piribedil HCl          |
| BIOMOL | DL-191 | N(CCN(C)C)(Cc1ccc(OC)cc1)c2ncccc2                                                                                                                                                                                                                                                                               | C19H24N6O5S2  | 480.561 | Cefepime               |
| BIOMOL | AC-277 | N(CCN(C)C)(Cc1ccc(OC)cc1)c2ncccc2                                                                                                                                                                                                                                                                               | C17H23N3O     | 285.384 | Mepyramine maleate     |
| BIOMOL | DL-178 | c(NC(=O)CC1)(cc(OC)CCCN2CCN(c3cccc(Cl)c3Cl)CC2)cc4)c14                                                                                                                                                                                                                                                          | C23H27Cl2N3O2 | 448.385 | Aripiprazole           |
| BIOMOL | AC-279 | C(=Cl)CN1CCCC1)/(c2ncccc2)\c3ccc(C)cc3                                                                                                                                                                                                                                                                          | C19H22N2      | 278.391 | Trans-triprolidine HCl |
| BIOMOL | DL-264 | c1(c(C(=O)O)ccc2)c2nc(OC)n1Cc3ccc(c4ccccc4c5nn[nH]5)cc3<br>[C@@]1([H])([H])(C1C2)=ClC=C(Cl)C[C@@H](O)C[C@@H]3O)/C3=C)[C@@]<br>(C)([C@@H]([C@H](C)CCCC(C)C)O)CC1)CC2                                                                                                                                             | C24H20N6O3    | 440.454 | Candesartan            |
| BIOMOL | DM200  | [C@H]1([C@H](C[C@H](O)O[C@H]1O(C)O)O(C)[C@]2(O3)C[C@@]([H])(<br>OC(=O)[C@]([H])(C)=C(C)[C@H]4O)[C@](O)(\ClCO5)=ClC=C(Cl)[C@H](C)<br>[C@H]([C@H](C(=Cl)C6)C)O[C@@H]([O][C@H]7C)C[C@H]([C@@H]7C)OC<br>)[C@@]45[H])C[C@]36[H])=C                                                                                   | C27H44O3      | 416.636 | Calcitriol             |
| BIOMOL | DL-301 | [C@]1(Cn2cnc2)(O[C@H](COc3ccc(N4CCN(C(=O)C)CC4)cc3)O1)c5ccc<br>(Cl)cc5Cl                                                                                                                                                                                                                                        | C47H71O14R    | 860.058 | Abamectin              |
| BIOMOL | EI-107 | [C@](C)([C@@H]([C@H](C)CCCC(C)C)CC1)(CC2)[C@]1([H])C(Cl)C2=C/C<br>=C(Cl)C[C@@H](O)C[C@@H]3O)/C3=C                                                                                                                                                                                                               | C26H28Cl2N4O4 | 531.431 | Ketoconazole           |
| BIOMOL | DL-222 | C(c1cccc1)(c2cccc2)N3CCN(CCCN4C(=O)Nc5c4cccc5)CC3                                                                                                                                                                                                                                                               | C27H44O2      | 400.637 | Alfacalcidol           |
| BIOMOL | EI-114 | C(c1cccc1)(c2cccc2)N3CCN(CCCN4C(=O)Nc5c4cccc5)CC3                                                                                                                                                                                                                                                               | C27H30N4O     | 426.553 | Oxatamide              |

|        |        |                                                                                                                                                                                                                        |                             |          |                                         |
|--------|--------|------------------------------------------------------------------------------------------------------------------------------------------------------------------------------------------------------------------------|-----------------------------|----------|-----------------------------------------|
| BIOMOL | DL-151 | <chem>C1(=CC(=S)SS1)c2ccc(OC)cc2</chem>                                                                                                                                                                                | <chem>C10H8OS3</chem>       | 240.365  | Anethole-trithione<br>(anetholtrithion) |
| BIOMOL | EI-121 | <chem>c(c(OCC(O)CO)c1cccc2c1C(=O)C=C(C([O-])=O)O2)ccc3(C(=O)C=C(C([O-])=O)O4)c34.[Na+].[Na+]</chem>                                                                                                                    | <chem>C23H14Na2O11</chem>   | 512.33   | Disodium cromoglycate                   |
| BIOMOL | DL-144 | <chem>c1(C(C)(C)C#N)cc(Cn2ncnc2)cc(C(C)(C)C#N)c1</chem>                                                                                                                                                                | <chem>C17H19N5</chem>       | 293.366  | Anastrozole                             |
| BIOMOL | EI-125 | <chem>c1(CNC(=O)CCCC(C=O)C(C)C)ccc(O)c(O)C1</chem>                                                                                                                                                                     | <chem>C18H27NO3</chem>      | 305.412  | Capsaicin                               |
| BIOMOL | DL-162 | <chem>c1(C(F)(F)F)cc(NC(=O)C(O)(C)CS(=O)(=O)c2ccc(F)cc2)ccc1C#N</chem>                                                                                                                                                 | <chem>C18H14F4N2O4S</chem>  | 430.373  | Bicalutamide                            |
| BIOMOL | EI-126 | <chem>C(C(=O)C=C(C([C@@]12C)CC[C@@]3([H])(C@]1F)[C@@H](O)C[C@@]([C@]34[H])(C)[C@@]([O])(C(CO)=O)[C@H](C)C4)=C2</chem>                                                                                                  | <chem>C22H29FO5</chem>      | 392.461  | Dexamethasone                           |
| BIOMOL | DL-180 | <chem>C(Cl)(Cl)(P(=O)(O)O)P(=O)(O)O</chem>                                                                                                                                                                             | <chem>CH4Cl2O6P2</chem>     | 244.892  | Clodronate disodium                     |
| BIOMOL | EI-127 | <chem>c(c(N1CCCCC1)nc(N(CCO)CCO)n2)(nc(N(CCO)CCO)nc3N4CCCCC4)c23</chem>                                                                                                                                                | <chem>C24H40N8O4</chem>     | 504.626  | Dipyridamole                            |
| BIOMOL | DL-102 | <chem>[C@H]([C@H](C)Cl)(NC(=O)[C@@H]1C[C@@H](CCC)CN1C)[C@@H]2[C@H](O)[C@H](O)[C@H](O)[C@H](SC)O2</chem>                                                                                                                | <chem>C18H33ClN2O5S</chem>  | 424.983  | Clindamycin palmitate                   |
| BIOMOL | EI-128 | <chem>c1(C(=O)C(=C)CC)ccc(OCC(=O)O)c(Cl)c1Cl</chem>                                                                                                                                                                    | <chem>C13H12Cl2O4</chem>    | 303.138  | Ethacrynic acid                         |
| BIOMOL | DL-164 | <chem>c1(cc(C)C)c(C(C#N)c2ccc(Cl)cc2)c(Cl)c1)N3N=CC(=O)NC3=O</chem>                                                                                                                                                    | <chem>C17H9Cl3N4O2</chem>   | 407.638  | Diclazuril                              |
| BIOMOL | EI-131 | <chem>c(ccc(O)C)c1(n(C(=O)c2ccc(Cl)cc2)c(C)C3CC(=O)O)c13</chem>                                                                                                                                                        | <chem>C19H16ClNO4</chem>    | 357.788  | Indomethacin                            |
| BIOMOL | DL-302 | <chem>n1([C@H]2CC[C@@H](CO)O2)cnc3c1N=CNC3=O</chem>                                                                                                                                                                    | <chem>C10H12N4O3</chem>     | 236.227  | Didanosine                              |
| BIOMOL | EI-133 | <chem>c(cc([C@H](C)C(=O)O)cc1)(ccc(O)C)c12</chem>                                                                                                                                                                      | <chem>C14H14O3</chem>       | 230.259  | Naproxen                                |
| BIOMOL | DL-199 | <chem>[C@]([H])([H])(C[C@@]([H])(O)C(=O)c1c[nH]c21cccc2)C3)(C4)N(CC5=O)[C@]3([H])C[C@@]45[H]</chem>                                                                                                                    | <chem>C19H20N2O3</chem>     | 324.374  | Dolasetron                              |
| BIOMOL | AC-280 | <chem>c1(CSCC1N=C1\NC)/NC#N)nc[nH]c1C</chem>                                                                                                                                                                           | <chem>C10H16N6S</chem>      | 252.339  | Cimetidine                              |
| BIOMOL | DL-101 | <chem>c1(ccccc2c2cccc1CN(C)Cc3ccc(C(C)(C)C)cc3</chem>                                                                                                                                                                  | <chem>C23H27N</chem>        | 317.467  | Butenafine                              |
| BIOMOL | AC-282 | <chem>c1(CSCCNC1\NC)=N.C#N)csc(NC(=N)N)n1</chem>                                                                                                                                                                       | <chem>C10H16N8S2</chem>     | 312.418  | Tiotidine                               |
| BIOMOL | DL-200 | <chem>c(sc(S(=O)(=O)N)c1)(S(=O)(=O)[C@@H](C)C[C@@H]2NCC)c12</chem>                                                                                                                                                     | <chem>C10H16N2O4S3</chem>   | 324.44   | Dorzolamide                             |
| BIOMOL | DL-555 | <chem>c1c2c(ccc1)c(CS(=O)(=O)N)no2</chem>                                                                                                                                                                              | <chem>C8H8N2O3S</chem>      | 212.226  | Zonisamide                              |
| BIOMOL | DL-212 | <chem>[C@]1(OCc(c12)cc(C#N)cc2)(CCCN(C)C)c3ccc(F)cc3</chem>                                                                                                                                                            | <chem>C20H21FN2O</chem>     | 324.392  | Escitalopram                            |
| BIOMOL | DL-556 | <chem>C(O)(Cn1cnc1)(P(=O)(O)O)P(=O)(O)O</chem>                                                                                                                                                                         | <chem>C5H10N2O7P2</chem>    | 272.09   | Zoledronic acid                         |
| BIOMOL | DL-209 | <chem>n1(Cc2ccc(C(=O)O)cc2)c(CCCC)nc1C=C(C(=O)O)/Cc3sc3</chem>                                                                                                                                                         | <chem>C23H24N2O4S</chem>    | 424.513  | Eprosartan                              |
| BIOMOL | AC-322 | <chem>[C@](CCN1CC2CC2)([C@@H]3C(=O)CC4)([C@]4O)[C@H]1C5)c(c5ccc6O)c6O3</chem>                                                                                                                                          | <chem>C20H23NO4</chem>      | 341.401  | Naltrexone HCl                          |
| BIOMOL | DL-119 | <chem>c1(CC([O-])=O)cccc1.[Na+]</chem>                                                                                                                                                                                 | <chem>C8H7NaO2</chem>       | 158.13   | Sodium phenylacetate                    |
| BIOMOL | DL-560 | <chem>[nH]1c(cc2)c(cc2[C@@H]3NC(=C)OC3)(CCN(C)C)c1.O</chem>                                                                                                                                                            | <chem>C17H25N3O2</chem>     | 303.399  | zolmitriptan                            |
| BIOMOL | DL-551 | <chem>c1(ccc(Cl)C(=O)O)cc1)Cn2cnc2</chem>                                                                                                                                                                              | <chem>C13H12N2O2</chem>     | 228.247  | Ozagrel                                 |
| BIOMOL | AC-408 | <chem>[C@]1(C)[C@]([H])([H])(C[C@@]2(C)C1)[C@]3(N)C2)C3</chem>                                                                                                                                                         | <chem>C12H21N</chem>        | 179.302  | Memantine HCl                           |
| BIOMOL | DL-217 | <chem>c1(C=C(C#N))C(=O)N(CC)CC)cc(O)c(O)c1n[([O-])=O)c1</chem>                                                                                                                                                         | <chem>C14H15N3O5</chem>     | 305.286  | Entacapone                              |
| BIOMOL | AC-439 | <chem>N1(CCCC1=O)C(=O)c2ccc(OC)cc2</chem>                                                                                                                                                                              | <chem>C12H13NO3</chem>      | 219.237  | Aniracetam                              |
| BIOMOL | AP-302 | <chem>[C@@H](c1nc[nH]c1)(O)[C@H]2O[C@@H](CO)[C@@H](O)[C@H](O)[C@@H]2O[C@@H]3O[C@H](CO)[C@@H](O)[C@@H](OC(=O)N)[C@@H]3O)[C@H](C(=O)N)[C@H](C)[C@@H](O)[C@H](C)C(=O)N[C@H]([C@H](O)C)C(=O)NCCc4sc(c5ncc(C(=O)N)CC</chem> | <chem>C55H84N17O21S3</chem> | 1415.552 | Bleomycin sulfate                       |
| BIOMOL | AC-501 | <chem>C(F)(F)F)Oc1ccc2c(sc(N)n2)c1</chem>                                                                                                                                                                              | <chem>C8H5F3N2OS</chem>     | 234.198  | Riluzole HCl                            |
| BIOMOL | AR-100 | <chem>c(c(OCC(CNC(C)(C)C)OC(=O)c1cccc1)ccc2)(cc(C)[nH]3)c23</chem>                                                                                                                                                     | <chem>C23H28N2O3</chem>     | 380.48   | Bopindolol malonate                     |
| BIOMOL | AC-508 | <chem>c1(C(C)C)cccc(C(C)C)c1O</chem>                                                                                                                                                                                   | <chem>C12H18O</chem>        | 178.271  | Propofol                                |
| BIOMOL | AR-102 | <chem>c1(c(Cl)cccc1Cl)CC(=O)NC(=N)N.Cl</chem>                                                                                                                                                                          | <chem>C9H10Cl3N3O</chem>    | 282.554  | Guanfacine HCl                          |
| BIOMOL | EI-160 | <chem>c1(ccc(Cl)cc1)OC(C)(C)C(=O)OCC</chem>                                                                                                                                                                            | <chem>C12H15ClO3</chem>     | 242.699  | Clofibrate                              |
| BIOMOL | DL-192 | <chem>N1(C(=O)[C@H](C)N[C@H](C)O(=O)CCc2ccccc2)CCC[C@H]1C(=O)O</chem>                                                                                                                                                  | <chem>C18H24N2O5</chem>     | 348.394  | Enalaprilat                             |
| BIOMOL | EI-164 | <chem>c1(ccc(CC(C)C)cc1)C(C)C(=O)O</chem>                                                                                                                                                                              | <chem>C13H18O2</chem>       | 206.281  | Ibuprofen                               |
| BIOMOL | DL-108 | <chem>c1(c2ccc(F)cc2)c(\C=C[C@@H](O)C[C@@H](O)CC(O)=O)n(C(C)C)c3c1cccc3</chem>                                                                                                                                         | <chem>C24H26FNO4</chem>     | 411.466  | Fluvastatin Na                          |
| BIOMOL | EI-165 | <chem>c1(CNNC(=O)C(N)CO)ccc(O)c(O)c1O</chem>                                                                                                                                                                           | <chem>C10H15N3O5</chem>     | 257.243  | Benserazide HCl                         |
| BIOMOL | DL-155 | <chem>[C@@H]1(C2CCCCC2)C[C@@H](C(=O)O)N(C(=O)CP(=O)(CCCCc3cccc3)OC(C(C)C)OC(=O)CC)C1</chem>                                                                                                                            | <chem>C30H46NO7P</chem>     | 563.663  | Fosinopril                              |
| BIOMOL | EI-166 | <chem>c(cccc1)(CN(C(=N)N)CC2)c12</chem>                                                                                                                                                                                | <chem>C10H13N3</chem>       | 175.23   | Debrisoquin sulfate                     |
| BIOMOL | DL-215 | <chem>[C@H]1(O[C@H](CO)[C@@H](O)C1(F)F)N2C=CC(N)=NC2=O</chem>                                                                                                                                                          | <chem>C9H11F2N3O4</chem>    | 263.198  | Gemcitabine HCl                         |
| BIOMOL | EI-167 | <chem>C1(N2CCN(C)CC2)Cc3c(ccc3)Sc4c1cc(SC)cc4</chem>                                                                                                                                                                   | <chem>C8H24N2S2</chem>      | 356.548  | Methiothepin maleate                    |
| BIOMOL | DL-243 | <chem>[C@]12(O3)[C@]([C@@H]4OC1=O)([C@@]([C@@H](O)C(=O)O5)([C@]35[H])(C@H](C(C)C)C4)C[C@@]6([H])(C@]2([C@H](C)C(=O)O6)</chem>                                                                                          | <chem>C20H24O9</chem>       | 408.399  | Ginkgolide a                            |
| BIOMOL | EI-168 | <chem>c1(Oc2cccc2)c(S(=O)(=O)N)cc(C(=O)O)cc1NCCCC</chem>                                                                                                                                                               | <chem>C17H20N2O5S</chem>    | 364.416  | Bumetanide                              |
| BIOMOL | DL-166 | <chem>c1(cccc2c2n(C)nc1C(=O)N[C@H]3C[C@]4([H])N(C)[C@@]([H])(CCC4)C3</chem>                                                                                                                                            | <chem>C18H24N4O</chem>      | 312.409  | Granisetron                             |

|        |         |                                                                                                                                                                   |                 |         |                                |
|--------|---------|-------------------------------------------------------------------------------------------------------------------------------------------------------------------|-----------------|---------|--------------------------------|
| BIOMOL | EI-180  | [C@@H]1O[C@@H]2[C@H](N)[C@@H](O)[C@H](O)[C@@H](CN)O2[C@@H](N)C[C@@H](N)[C@H](O)[C@H]1O[C@@H]3O[C@H](CO)[C@@H](O)[C@@H]4[C@H](N)[C@@H](O)[C@H](O)[C@H](CN)O4[C@H]3 | C23H46N6O13     | 614.644 | Neomycin sulfate               |
| BIOMOL | DL-105  | C1(=O)O[Pt]OC1.N.N                                                                                                                                                | C2H8N2O3Pt      | 303.175 | Nedaplatin                     |
| BIOMOL | EI-206  | [C@H]1(OC(=O)C)[C@H](OC(=O)C)[C@@H](COC(=O)C)O[C@@H](S[Au])=P(CC)(CC)CC[C@H]1OC(=O)C                                                                              | C20H34AuO9PS    | 678.484 | Auranofin                      |
| BIOMOL | DL-303  | C1(=O)O[Pt]OC1=O.[C@]2([H])(N)CCCC[C@@]2([H])N                                                                                                                    | C8H14N2O4Pt     | 397.286 | Oxaliplatin                    |
| BIOMOL | EI-213  | N1(C(=O)[C@H](C)CS)CC[C@H]1C(=O)O                                                                                                                                 | C9H15NO3S       | 217.285 | Captopril                      |
| BIOMOL | DL-174  | c1(\C=C\C)ccc(OC)cc1                                                                                                                                              | C10H12O         | 148.202 | Anethole, trans-               |
| BIOMOL | EI-216  | C(CCCCC#CCCC#CCO)(C(=O)C(C)=C(C)C1=O)=C1C                                                                                                                         | C21H26O3        | 326.429 | Docenone                       |
| BIOMOL | DL-546  | [C@@H](C(C)(C)C)(NC(OC)=O)C(=O)NN(Cc1ccc(c2ccccc2)cc1)C[C@H](O)[C@H](Cc3ccccc3)NC(=O)[C@H](C(C)(C)C)NC(OC)=O                                                      | C38H52N6O7      | 704.855 | Atazanavir                     |
| BIOMOL | DL-545  | c(COC1=O)c(C(C)c(OC)c(C(C)=C(/)CCC(=O)OCCN2CCOCC2)c3O)c13                                                                                                         | C23H31NO7       | 433.495 | Mycophenolate mofetil          |
| BIOMOL | DL-363  | [C@]1(C(=O)CC)(OC(=O)CC)[C@@H](C)C[C@]2([H])[C@]1(C)C[C@H](O)[C@@]3(F)[C@@]2([H])CCC(=C4)[C@]3(C)C=CC4=O                                                          | C25H32ClFO5     | 466.97  | Clobetasol propionate          |
| BIOMOL | DL-544  | c1(ccc(c2cc(Cl)ccc2c3ccc(C)nc3)cc1)S(C)(=O)=O                                                                                                                     | C18H15ClN2O2S   | 358.842 | Etoricoxib                     |
| BIOMOL | DL-364  | c1(cc(C)c(NC(=O)c2cc(l)cc(l)c2O)cc1C)(C#N)c3ccc(Cl)cc3                                                                                                            | C22H14Cl2I2N2O2 | 663.074 | Clozantel                      |
| BIOMOL | DL-103  | c1(nc(Cl)nc2N)c2ncn1[C@H]3[C@@H](F)[C@H](O)[C@@H](CO)O3                                                                                                           | C10H11ClFN5O3   | 303.677 | Clofarabine                    |
| BIOMOL | DL-365  | [C@]([H])([C@]1(C)C=CC(=O)CC1)CC2([C@@H](O)C[C@@]3(C)[C@@]4([H])CC[C@@H]3C(=O)CO)[C@@]24[H]                                                                       | C21H30O4        | 346.461 | Corticosterone                 |
| BIOMOL | DL-219  | [C@@]1([H])(C[C@@H](C(=O)N(CCCN(C)C)C(=O)NCC)CN2CC=C)[C@@]2([H])Cc3c(c4[nH]c3)c1ccc4                                                                              | C26H37N5O2      | 451.604 | Cabergoline                    |
| BIOMOL | DL-366  | c1(ccccc1C)N(CC)C(=O)C=C1C                                                                                                                                        | C13H17NO        | 203.28  | Crotamiton                     |
| BIOMOL | DL-207  | c1(C(=O)OCCCN2CCCN(CCCOC(=O)c3cc(OC)c(OC)c(OC)c3)CC2)cc(OC)c(OC)c(OC)c1                                                                                           | C31H44N2O10     | 604.688 | Dilazep                        |
| BIOMOL | DL-367  | P1(=O)(OCCCN1)N(CCC)CCCl                                                                                                                                          | C7H15Cl2N2O2P   | 261.086 | Cyclophosphamide monohydrate   |
| BIOMOL | DL-213  | C(O)(P(=O)(O)O)(P(=O)(O)O)CCN(C)CCCC                                                                                                                              | C9H23NO7P2      | 319.229 | Ibandronate                    |
| BIOMOL | DL-368  | C1=C2[C@](C)([C@@H]3[C@@H](C3)C2=O)[C@]4([H])[C@]([H])([C@]([C@]5(C)CC4)([H])CC[C@@]5(C)C(=O)OC(=O)C=C1)C1                                                        | C24H29ClO4      | 416.938 | Cyproterone acetate            |
| BIOMOL | DL-202  | N(C(C(=O)O)=C(SCCN=C)C1)(C(=O)[C@]2([H])[C@]([H])(O)C)[C@]12[H]                                                                                                   | C12H17N3O4S     | 299.346 | Imipenem                       |
| BIOMOL | DL-369  | [C@H](O[C@H](CO)[C@H]1O)(N2C(=NC(=N)C=C2)O3)[C@H]13                                                                                                               | C9H11N3O4       | 225.201 | Cyclocytidine HCl              |
| BIOMOL | DL-156  | C1(CCCCC1)NC(=O)N(N=O)CCCl                                                                                                                                        | C9H16ClN3O2     | 233.695 | Lomustine                      |
| BIOMOL | DL-370  | [C@@H]1([C@@H](O)[C@H](O)[C@@H](CO)O1)N2C=CC(N)=NC2=O                                                                                                             | C9H13N3O5       | 243.217 | Cytarabine                     |
| BIOMOL | DL-543  | [C@]1([H])([C@]2([H])C[C@@H](O)[C@@H]1C=C[C@@H](O)C)CC#C(C)C(C(=O)C)CC(C(=O)O)C2                                                                                  | C22H32O4        | 360.487 | Iloprost                       |
| BIOMOL | DL-371  | c1(N=NN(C)C)[nH]cnc1C(=O)N                                                                                                                                        | C6H10N6O        | 182.183 | Dacarbazine                    |
| BIOMOL | DL-244  | C(c1ccc(F)cc1)(c2ccc(F)cc2)N3CCN(Cc4ccc(OC)c(OC)c4OC)CC3                                                                                                          | C27H30F2N2O3    | 468.536 | Lomerizine HCl                 |
| BIOMOL | DL--372 | [C@]([H])([C@]1(C)C=Cc(c2C1)onc2)CC3(CC[C@@]4(C)[C@@]5([H])C[C@@]4(O)C#C)[C@@]35[H]                                                                               | C22H27NO2       | 337.455 | Danazol                        |
| BIOMOL | DL-439  | c(cc(C(=O)c1ccccc1)cc2)(nc(NC(=O)OC)[nH]3)c23                                                                                                                     | C16H13N3O3      | 295.293 | Mebendazol                     |
| BIOMOL | DL-514  | [C@@]([H])([C@@H](N(C)C)C(=O)C(C(=O)N)C1=O)[C[C@@]([H])(C2=C3O)[C@@]([O])(C)c(c4C2=O)cccc4O)[C@@]13O                                                              | C22H24N2O8      | 444.435 | Tetracycline                   |
| BIOMOL | DL-440  | c1(C(=O)N)cccc1                                                                                                                                                   | C6H6N2O         | 122.125 | Medroxyprogesterone 17-acetate |
| BIOMOL | DL-169  | c(nc(OC)cc1)(nc(S(=O)Cc2ncc(C)c(OC)c2C)[nH]3)c13                                                                                                                  | C16H18N4O3S     | 346.404 | Tenatoprazole                  |
| BIOMOL | DL-441  | c1(Nc2cccc(C)c2C)cccc1C(=O)O                                                                                                                                      | C15H15NO2       | 241.285 | Mefenamic acid                 |
| BIOMOL | DL-190  | c(c(C(=O)N)nc1)(N=NN(C)C2=O)n12                                                                                                                                   | C6H6N6O2        | 194.151 | Temozolomide                   |
| BIOMOL | DL-442  | c1(ccc(C[C@H](N)C(=O)O)cc1)N(CCC)CCCl                                                                                                                             | C13H18Cl2N2O2   | 305.2   | Melphalan                      |
| BIOMOL | DL-206  | [C@]1([H])([C@H](C)CC2=C3CCC(=O)C2)[C@]3([H])CC[C@@]4(C)[C@@]1([H])CC[C@@]4(O)C#C                                                                                 | C21H28O2        | 312.446 | Tibolone                       |
| BIOMOL | DL-443  | [C@@](N)(C)(Cc1ccc(O)c(O)c1)C(=O)O                                                                                                                                | C10H13NO4       | 211.215 | Methyldopa                     |
| BIOMOL | DL-515  | C(OC1ccsc1Cl)(Cn2cnc2)c3ccc(Cl)cc3Cl                                                                                                                              | C16H13Cl3N2OS   | 387.711 | Tioconazole                    |
| BIOMOL | DL-444  | [C@]1([H])(C[C@H](C)CC2=C3CCC(=O)C2)[C@]3([H])CC[C@@]4(C)[C@@]1([H])CC[C@@]4(O)C#C                                                                                | C22H30O5        | 374.471 | Methylprednisolone             |
| BIOMOL | DL-516  | S(=O)(=O)(CC)CCn1c(C)nc1[N+][O-]=O                                                                                                                                | C8H13N3O4S      | 247.272 | Tinidazole                     |
| BIOMOL | DL-445  | c1(OCC(O)CNC(C)C)ccc(COC)cc1                                                                                                                                      | C15H25NO3       | 267.364 | Metoprolol tartrate            |
| BIOMOL | DL-517  | [C@H]1O[C@@H]2[C@H](O)[C@@H](N)[C@H](O)[C@@H](CO)O2[C@@H](N)C[C@H](N)[C@@H](O)[C@@H]3[C@H](N)C[C@H](O)[C@@H](CN)O3[C@H]1O                                         | C18H37N5O9      | 467.514 | Tobramycin (free base)         |
| BIOMOL | DL-446  | C1(=S)NC=CN1C                                                                                                                                                     | C4H6N2S         | 114.169 | Methimazole                    |



|        |        |                                                                                                                                                                                                                                                                   |                |          |                        |
|--------|--------|-------------------------------------------------------------------------------------------------------------------------------------------------------------------------------------------------------------------------------------------------------------------|----------------|----------|------------------------|
| BIOMOL | DL-188 | c1(nc(N2CCC(N)C2)c(F)c3C(=O)C(C(=O)O)=CN1c4ccc(F)cc4F                                                                                                                                                                                                             | C19H15F3N4O3   | 404.343  | Tosufloxacin           |
| BIOMOL | DL-447 | n1(CCO)c(C)ncc1[N+][([O-])=O<br>C([C@@](O)(CC)C(=O)O)C1)(C=C(N2C3=O)c4c(cc(c5n4)c(CN(C)C)c(O)cc5)C2)=C13                                                                                                                                                          | C6H9N3O3       | 171.154  | Metronidazole          |
| BIOMOL | DL-518 |                                                                                                                                                                                                                                                                   | C23H23N3O5     | 421.446  | Topotecan              |
| BIOMOL | DL-448 | c1(ccc(Cl)cc1Cl)C(OCc2ccc(Cl)cc2Cl)Cn3cncc3                                                                                                                                                                                                                       | C18H14Cl4N2O   | 416.129  | Miconazole             |
| BIOMOL | DL-519 | C/(c1cccc1)\(c2ccc(OC CN(C)C)cc2)=C(/CCCl)\c3ccccc3                                                                                                                                                                                                               | C26H28ClNO     | 405.96   | Toremifene             |
| BIOMOL | DL-138 | c1(c(Cl)cccc1Cl)OC(C)C2=NCCN2                                                                                                                                                                                                                                     | C11H12Cl2N2O   | 259.132  | Lofexidine             |
| BIOMOL | DL-373 | [C@@]([H])([C@@]1([H])[C@@](C)(C(=O)CC1)CC2)(CC=C3[C@]4(C)COC[C@H](O)C3)[C@]24[H]<br>N(C(C(=O)O)=C[S](C@H)1CN[C@H](C(=O)N(C)C)C1)[C@@H]2C)(C(=O)[C@]3([H])[C@H](O)C)[C@]23[H]                                                                                     | C19H28O2       | 288.424  | Dehydroepiandrosterone |
| BIOMOL | DL-167 | C(=C\C(CNCN1)/C1)/c2c(cccn2)CC3)c(ccc(Cl)c4)c34                                                                                                                                                                                                                   | C17H25N3O5S    | 383.463  | Meropenem              |
| BIOMOL | DL-154 |                                                                                                                                                                                                                                                                   | C19H19ClN2     | 310.821  | Desloratadine          |
| BIOMOL | DL-205 | C1(NCCN(CCO)CCCc2ccc([N+][([O-])=O)cc2)=CC(=O)N(C)C(=O)N1C                                                                                                                                                                                                        | C19H27N5O5     | 405.448  | Nifekalant HCl         |
| BIOMOL | DL-374 | [C@]1(CCN2C)(CCCC3)[C@]23([H])[C@H]2Cc4c1cc(O)C)cc4<br>c1(C[C@H]2C(=O)N[C@H](CCCN)C(=O)N[C@H]([C@H](O)C)C(=O)N[C@H](C(=O)N[C@H](CO)[C@H](O)C)CSSC[C@H](NC(=O)[C@H](N)Cc3ccccc3)C(=O)N[C@H]([Co4ccccc4])C(=O)N2)c[nH]c5c1cccc5                                     | C18H25NO       | 271.397  | Dextromethorphan HBr   |
| BIOMOL | DL-309 |                                                                                                                                                                                                                                                                   | C49H66N10O10S2 | 1019.239 | Octreotide             |
| BIOMOL | DL-375 | c1(Nc2c(Cl)cccc2Cl)ccccc1CC(O)=O                                                                                                                                                                                                                                  | C14H11Cl2NO2   | 296.149  | Diclofenac, Na         |
| BIOMOL | DL-194 | [C@@H]1(O(C(C)CC)C)C=C(C(=O)OCC)C[C@H](N)[C@H]1NC(=O)C                                                                                                                                                                                                            | C16H28N2O4     | 312.405  | Osetamivir             |
| BIOMOL | DL-376 | [C@@H]1(CC[C@@H](CO)O1)N2C=CC(N)=NC2=O                                                                                                                                                                                                                            | C9H13N3O3      | 211.218  | 2',3'- dideoxycytidine |
| BIOMOL | DL-196 | C(O)(CCN)(P(=O)(O)O)P(=O)(O)O                                                                                                                                                                                                                                     | C3H11NO7P2     | 235.069  | Pamidronic acid        |
| BIOMOL | DL-377 | C/(CC)\(c1ccc(O)cc1)=C(C(C)/c2ccc(O)cc2                                                                                                                                                                                                                           | C18H20O2       | 268.35   | Diethylstilbestrol     |
| BIOMOL | DL-197 | c(nc(N)s1)(CC[C@H](NCCC)C2)c12                                                                                                                                                                                                                                    | C10H17N3S      | 211.327  | Pramipexole            |
| BIOMOL | DL-378 | c1(ccc(F)cc1F)c2ccc(O)c(C(=O)O)c2<br>c1(cccc2c2[nH]cc1C[C@H](C(=O)N[C@H](CC(C)C)C(=O)N[C@H](CCCN(C=N)N)C(=O)N3CCC[C@H]3C(=O)NCC(=O)N)NC(=O)[C@@H](NC(=O)[C@H](CO)NC(=O)[C@@H](NC(=O)[C@H](NC(=O)[C@H]4CCCC(=O)N4)Cc5nc[nH]c5)Cc6c[nH]c7c6                         | C13H8F2O3      | 250.198  | Diflunisal             |
| BIOMOL | DL-310 |                                                                                                                                                                                                                                                                   | C64H82N18O13   | 1311.449 | Triptorelin            |
| BIOMOL | DL-379 | N(CC)(CC)C(=S)SSC(=S)N(CC)CC<br>c(c1o2)(C(=O)[C@@]2(C)O\C=C[C@H](O(C)[C@H](C)[C@H](C(=O)O)C)[C@H](C)[C@@H](O)[C@H](C)[C@H](O)[C@H](O)C=C\C(C(=O)C(=O)N3)c(c([O-])cc3c4O)c4C(O)c1C                                                                                 | C10H20N2S4     | 296.539  | Disulfiram             |
| BIOMOL | NP-526 |                                                                                                                                                                                                                                                                   | C37H46NO12     | 696.761  | Rifamycin sv           |
| BIOMOL | DL-204 | c(nc(N1CCN(C(=O)C2COc3c(cccc3)O2)CC1)nc4N)(cc(OC)c(O)C)c5)c45                                                                                                                                                                                                     | C23H25N5O5     | 451.475  | Doxazosin mesylate     |
| BIOMOL | DL-198 | C(O)(P(=O)(O)O)(P(=O)(O)O)Cc1cnccc1                                                                                                                                                                                                                               | C7H11NO7P2     | 283.112  | Risedronic acid        |
| BIOMOL | DL-380 | [C@H]1(O[C@H](C)[C@@H](O)[C@H]1O)N2C=C(F)C(=O)NC2=O<br>[C@]([H])([H])([C@H](N(C)C)C(O)=C(C(=O)N)C1=O)(C[C@@]([H])([H])(C2=C3O)Cc(c4C2=O)c(N(C)C)ccc4O)[C@@]13O                                                                                                    | C9H11FN2O5     | 246.192  | Doxifluridine          |
| BIOMOL | DL-449 |                                                                                                                                                                                                                                                                   | C23H27N3O7     | 457.476  | Minocycline HCl        |
| BIOMOL | DL-520 | c1(Nc2cccc(Cl)c2C)ccccc1C(=O)O                                                                                                                                                                                                                                    | C14H12ClNO2    | 261.704  | Tofenamic acid         |
| BIOMOL | DL-450 | c(C(=O)c(c1C2=O)c(O)ccc1O)(c(NCCNCCO)ccc3NCCNCCO)c23                                                                                                                                                                                                              | C22H28N4O6     | 444.481  | Mitoxantrone 2HCl      |
| BIOMOL | DL-521 | c1(ccc(CC(O)=O)n1C)C(=O)c2ccc(C)cc2<br>[C@@]1([C@H](OC(=O)c2ccccc2)[C@@]3(O)C(C)C)C(=C(C)[C@@H](OC(=O)[C@H](O)[C@@H](NC(=O)c4ccccc4)c5ccccc5)C3)[C@H](OC(=O)C)c6=O)[C@@]6(C)[C@@H](O)[C@H](O)[C@H]([C@@]([C@]17O)C(C)=O)([H])O                                    | C15H15NO3      | 257.285  | Tolmetin Na            |
| BIOMOL | T-104  |                                                                                                                                                                                                                                                                   | C47H51NO14     | 853.906  | Taxol                  |
| BIOMOL | DL-522 | N1(C(=O)N)(C(=O)N)(C)C1=O)c2ccc(OC3ccc(SC(F)(F)F)cc3)c(C)c2                                                                                                                                                                                                       | C18H14F3N3O4S  | 425.382  | Toltrazuril            |
| BIOMOL | DL-452 | C(C#N)(CCCC)(Cn1ncnc1)c2ccc(Cl)cc2                                                                                                                                                                                                                                | C15H17ClN4     | 288.775  | Myclobutanil           |
| BIOMOL | DL-523 | [C@]1(O)(CCCC[C@H]1CN(C)C)c2cccc(OC)c2                                                                                                                                                                                                                            | C16H25NO2      | 263.375  | Tramadol HCl           |
| BIOMOL | DL-453 | c(N1C=C(C(=O)O)C2=O)(c2cc(F)c3N4CCCC(O)CC4)c3CCC1C<br>[C@](F)([C@]1(C)C(=CC(=O)C=C1)CC2)([C@H](O)C[C@@]3(C)[C@@]4([H])C[C@H](O)[C@]3(O)C(=O)CO)[C@@]24[H]                                                                                                         | C19H21FN2O4    | 360.379  | Nadifloxacin           |
| BIOMOL | DL-524 |                                                                                                                                                                                                                                                                   | C21H27FO6      | 394.434  | Triamcinolone          |
| BIOMOL | DL-454 | c(cc(CCC(=O)C)cc1)(ccc(OC)c2)c12                                                                                                                                                                                                                                  | C15H16O2       | 228.286  | Nabumetone             |
| BIOMOL | DL-525 | c1(cc(OC)c(O)C)c(OC)c1Cc2cnc(N)nc2N                                                                                                                                                                                                                               | C14H18N4O3     | 290.318  | Trimethoprim           |
| BIOMOL | DL-455 | c1(cccc2)c2cccc1CC3=NCCN3                                                                                                                                                                                                                                         | C14H14N2       | 210.274  | Naphazoline HCl        |
| BIOMOL | DL-158 | 3                                                                                                                                                                                                                                                                 | C17H20N2O2     | 284.353  | Tropisetron HCl        |
| BIOMOL | DL-456 | N1(CCOc2ccccc2)C(=O)N(CCCN3CCN(c4cccc(Cl)c4)CC3)N=C1CC<br>[C@@H]1(O[C@H]2O[C@@H](C)[C@H](O)[C@@](O)(C)C2)[C@@H](C)O[C@@H](O[C@@H]3[C@H](C)[C@H](O)CC(=O)O)[C@@H](CC)[C@H](CO)[C@H]4O[C@@H](C)[C@H](O)[C@H](OC)[C@@H]4OC)C=C(\C)/C=C/C(=O)[C@@H](C)[C@H]3C(=O)[C@] | C25H32ClN5O2   | 470.007  | Nefazodone             |
| BIOMOL | DL-526 |                                                                                                                                                                                                                                                                   | C45H75NO17     | 902.074  | Tylosin tartrate       |
| BIOMOL | DL-457 | c1(Nc2cccc(C(F)(F)F)c2)ncccc1C(=O)O                                                                                                                                                                                                                               | C13H9F3N2O2    | 282.218  | Niflumic acid          |
| BIOMOL | DL-527 | c(N=C(N)NC1=O)(n(COCCOC(=O)[C@H](N(C)C)C)cn2)c12                                                                                                                                                                                                                  | C13H20N6O4     | 324.336  | Valaciclovir           |

|        |        |                                                                                                                                                                                                                                                                                                                                                                                                                                                                                                                                                                                                                                                                                                                                                                                                                                                                                                                                                                                                                                                                                                                                                                                                                                                                                                                                                                                                                                                                                                                                                                                                                                                                                                                                                                                                                                                                                                                                                                                                                                                                                                                                                                                                                                                                                                                                                                                                                                                                                                                                                                                                                                                                                                                                                                                                                                                                                                                                                                                                                                                                                                                                                                                                                                                                                                                                                                                                                                                                                                                                                                                                                                                                                                                                                                                                                                                                                                                                                                                                                                                                                                                                                                                                                                                                                                                                                                                                                                                                                                                                                                                                                                                                                                                                                                                                                                                                                                                                                                                                                                                                                                                                                                                                                                                                                                                                                                                                                                                                                                                                                                                                                                                                                                                                                                                                                                                                                                                                                                                                                                                                                                                                                                                                                                                                                                                                                                                                                                                                                                                                                                                                                                                                                                                                                                                                                                                                                                                                                                                                                                                                                                                                                                                                                                                                                                                                                                                                                                                                                                                                                                                                                                                                                                                                                                                                                                                                                                                                                                                                                                                                                                                                                                                                                                                                                                                                                                                                                                                                                                                                                                                                                                                                                                                                                                                                                                                                                                                                    |                |         |                         |
|--------|--------|------------------------------------------------------------------------------------------------------------------------------------------------------------------------------------------------------------------------------------------------------------------------------------------------------------------------------------------------------------------------------------------------------------------------------------------------------------------------------------------------------------------------------------------------------------------------------------------------------------------------------------------------------------------------------------------------------------------------------------------------------------------------------------------------------------------------------------------------------------------------------------------------------------------------------------------------------------------------------------------------------------------------------------------------------------------------------------------------------------------------------------------------------------------------------------------------------------------------------------------------------------------------------------------------------------------------------------------------------------------------------------------------------------------------------------------------------------------------------------------------------------------------------------------------------------------------------------------------------------------------------------------------------------------------------------------------------------------------------------------------------------------------------------------------------------------------------------------------------------------------------------------------------------------------------------------------------------------------------------------------------------------------------------------------------------------------------------------------------------------------------------------------------------------------------------------------------------------------------------------------------------------------------------------------------------------------------------------------------------------------------------------------------------------------------------------------------------------------------------------------------------------------------------------------------------------------------------------------------------------------------------------------------------------------------------------------------------------------------------------------------------------------------------------------------------------------------------------------------------------------------------------------------------------------------------------------------------------------------------------------------------------------------------------------------------------------------------------------------------------------------------------------------------------------------------------------------------------------------------------------------------------------------------------------------------------------------------------------------------------------------------------------------------------------------------------------------------------------------------------------------------------------------------------------------------------------------------------------------------------------------------------------------------------------------------------------------------------------------------------------------------------------------------------------------------------------------------------------------------------------------------------------------------------------------------------------------------------------------------------------------------------------------------------------------------------------------------------------------------------------------------------------------------------------------------------------------------------------------------------------------------------------------------------------------------------------------------------------------------------------------------------------------------------------------------------------------------------------------------------------------------------------------------------------------------------------------------------------------------------------------------------------------------------------------------------------------------------------------------------------------------------------------------------------------------------------------------------------------------------------------------------------------------------------------------------------------------------------------------------------------------------------------------------------------------------------------------------------------------------------------------------------------------------------------------------------------------------------------------------------------------------------------------------------------------------------------------------------------------------------------------------------------------------------------------------------------------------------------------------------------------------------------------------------------------------------------------------------------------------------------------------------------------------------------------------------------------------------------------------------------------------------------------------------------------------------------------------------------------------------------------------------------------------------------------------------------------------------------------------------------------------------------------------------------------------------------------------------------------------------------------------------------------------------------------------------------------------------------------------------------------------------------------------------------------------------------------------------------------------------------------------------------------------------------------------------------------------------------------------------------------------------------------------------------------------------------------------------------------------------------------------------------------------------------------------------------------------------------------------------------------------------------------------------------------------------------------------------------------------------------------------------------------------------------------------------------------------------------------------------------------------------------------------------------------------------------------------------------------------------------------------------------------------------------------------------------------------------------------------------------------------------------------------------------------------------------------------------------------------------------------------------------------------------------------------------------------------------------------------------------------------------------------------------------------------------------------------------------------------------------------------------------------------------------------------------------------------------------------------------------------------------------------------------------------------------------------------------------------------------------------------------------------------------------------------------------------------------------------------------------------------------------------------------------------------------------------------------------------------------------------------------------------------------------------------------------------------------------------------------------------------------------------------------------------------------------------------------------------------------------------------------------------------------------------------------------------------------------------------------------------------------------------------------------------------------------------------------------------------------------------------------------------------------------------------------------------------------------------------------------------------------------------------------------------------------------------------------------------------------------------------------------------------------------------|----------------|---------|-------------------------|
| BIOMOL | DL-458 | [C@]([H])([C@@]1([H])[C@]2([H])([C@]2([H])C(=CC(=O)CC2)CC1)CC3)(CC[C@]4(O)C#C)[C@]34C                                                                                                                                                                                                                                                                                                                                                                                                                                                                                                                                                                                                                                                                                                                                                                                                                                                                                                                                                                                                                                                                                                                                                                                                                                                                                                                                                                                                                                                                                                                                                                                                                                                                                                                                                                                                                                                                                                                                                                                                                                                                                                                                                                                                                                                                                                                                                                                                                                                                                                                                                                                                                                                                                                                                                                                                                                                                                                                                                                                                                                                                                                                                                                                                                                                                                                                                                                                                                                                                                                                                                                                                                                                                                                                                                                                                                                                                                                                                                                                                                                                                                                                                                                                                                                                                                                                                                                                                                                                                                                                                                                                                                                                                                                                                                                                                                                                                                                                                                                                                                                                                                                                                                                                                                                                                                                                                                                                                                                                                                                                                                                                                                                                                                                                                                                                                                                                                                                                                                                                                                                                                                                                                                                                                                                                                                                                                                                                                                                                                                                                                                                                                                                                                                                                                                                                                                                                                                                                                                                                                                                                                                                                                                                                                                                                                                                                                                                                                                                                                                                                                                                                                                                                                                                                                                                                                                                                                                                                                                                                                                                                                                                                                                                                                                                                                                                                                                                                                                                                                                                                                                                                                                                                                                                                                                                                                                                              | C20H26O2       | 298.419 | Norethindrone           |
| BIOMOL | DL-528 | [C@](C)([C@@H](O)C(=O)C)[C@@H]([N+](C)CCCC1)C2)(CC[C@]3([H])[C@@]4([H])CC[C@]5([H])[C@]3(C)C[C@H](N6CCCC6)[C@@H](O)C(=O)C)C5)[C@@]24[H]                                                                                                                                                                                                                                                                                                                                                                                                                                                                                                                                                                                                                                                                                                                                                                                                                                                                                                                                                                                                                                                                                                                                                                                                                                                                                                                                                                                                                                                                                                                                                                                                                                                                                                                                                                                                                                                                                                                                                                                                                                                                                                                                                                                                                                                                                                                                                                                                                                                                                                                                                                                                                                                                                                                                                                                                                                                                                                                                                                                                                                                                                                                                                                                                                                                                                                                                                                                                                                                                                                                                                                                                                                                                                                                                                                                                                                                                                                                                                                                                                                                                                                                                                                                                                                                                                                                                                                                                                                                                                                                                                                                                                                                                                                                                                                                                                                                                                                                                                                                                                                                                                                                                                                                                                                                                                                                                                                                                                                                                                                                                                                                                                                                                                                                                                                                                                                                                                                                                                                                                                                                                                                                                                                                                                                                                                                                                                                                                                                                                                                                                                                                                                                                                                                                                                                                                                                                                                                                                                                                                                                                                                                                                                                                                                                                                                                                                                                                                                                                                                                                                                                                                                                                                                                                                                                                                                                                                                                                                                                                                                                                                                                                                                                                                                                                                                                                                                                                                                                                                                                                                                                                                                                                                                                                                                                                            | C34H57N2O4     | 557.827 | Vecuronium Br           |
| BIOMOL | DL-187 | C1CCC[N+](C(=C=C)[C@H]2C[C@]([H])([C@@]3(C)[C@H]2O)C(=O)C)[C@@]4([H])[C@@]([H])([C@]5(C)[C@]([H])(C[C@H](O)[C@@H](N6CCOC6)C5)CC4)CC3                                                                                                                                                                                                                                                                                                                                                                                                                                                                                                                                                                                                                                                                                                                                                                                                                                                                                                                                                                                                                                                                                                                                                                                                                                                                                                                                                                                                                                                                                                                                                                                                                                                                                                                                                                                                                                                                                                                                                                                                                                                                                                                                                                                                                                                                                                                                                                                                                                                                                                                                                                                                                                                                                                                                                                                                                                                                                                                                                                                                                                                                                                                                                                                                                                                                                                                                                                                                                                                                                                                                                                                                                                                                                                                                                                                                                                                                                                                                                                                                                                                                                                                                                                                                                                                                                                                                                                                                                                                                                                                                                                                                                                                                                                                                                                                                                                                                                                                                                                                                                                                                                                                                                                                                                                                                                                                                                                                                                                                                                                                                                                                                                                                                                                                                                                                                                                                                                                                                                                                                                                                                                                                                                                                                                                                                                                                                                                                                                                                                                                                                                                                                                                                                                                                                                                                                                                                                                                                                                                                                                                                                                                                                                                                                                                                                                                                                                                                                                                                                                                                                                                                                                                                                                                                                                                                                                                                                                                                                                                                                                                                                                                                                                                                                                                                                                                                                                                                                                                                                                                                                                                                                                                                                                                                                                                                               | C32H53N2O4     | 529.774 | Rocuronium bromide      |
| BIOMOL | DL-181 | c(n(CC1OCCO1)cnc2)(C(=O)N(C)C(=O)N3C)c23                                                                                                                                                                                                                                                                                                                                                                                                                                                                                                                                                                                                                                                                                                                                                                                                                                                                                                                                                                                                                                                                                                                                                                                                                                                                                                                                                                                                                                                                                                                                                                                                                                                                                                                                                                                                                                                                                                                                                                                                                                                                                                                                                                                                                                                                                                                                                                                                                                                                                                                                                                                                                                                                                                                                                                                                                                                                                                                                                                                                                                                                                                                                                                                                                                                                                                                                                                                                                                                                                                                                                                                                                                                                                                                                                                                                                                                                                                                                                                                                                                                                                                                                                                                                                                                                                                                                                                                                                                                                                                                                                                                                                                                                                                                                                                                                                                                                                                                                                                                                                                                                                                                                                                                                                                                                                                                                                                                                                                                                                                                                                                                                                                                                                                                                                                                                                                                                                                                                                                                                                                                                                                                                                                                                                                                                                                                                                                                                                                                                                                                                                                                                                                                                                                                                                                                                                                                                                                                                                                                                                                                                                                                                                                                                                                                                                                                                                                                                                                                                                                                                                                                                                                                                                                                                                                                                                                                                                                                                                                                                                                                                                                                                                                                                                                                                                                                                                                                                                                                                                                                                                                                                                                                                                                                                                                                                                                                                                           | C11H14N4O4     | 266.253 | Doxofylline             |
| BIOMOL | DL-148 | c(cc(S(=O)CCC)cc1)(nc(NC(=O)O)C)[nH]2)c12                                                                                                                                                                                                                                                                                                                                                                                                                                                                                                                                                                                                                                                                                                                                                                                                                                                                                                                                                                                                                                                                                                                                                                                                                                                                                                                                                                                                                                                                                                                                                                                                                                                                                                                                                                                                                                                                                                                                                                                                                                                                                                                                                                                                                                                                                                                                                                                                                                                                                                                                                                                                                                                                                                                                                                                                                                                                                                                                                                                                                                                                                                                                                                                                                                                                                                                                                                                                                                                                                                                                                                                                                                                                                                                                                                                                                                                                                                                                                                                                                                                                                                                                                                                                                                                                                                                                                                                                                                                                                                                                                                                                                                                                                                                                                                                                                                                                                                                                                                                                                                                                                                                                                                                                                                                                                                                                                                                                                                                                                                                                                                                                                                                                                                                                                                                                                                                                                                                                                                                                                                                                                                                                                                                                                                                                                                                                                                                                                                                                                                                                                                                                                                                                                                                                                                                                                                                                                                                                                                                                                                                                                                                                                                                                                                                                                                                                                                                                                                                                                                                                                                                                                                                                                                                                                                                                                                                                                                                                                                                                                                                                                                                                                                                                                                                                                                                                                                                                                                                                                                                                                                                                                                                                                                                                                                                                                                                                                          | C12H15N3O3S    | 281.331 | Ricobendazole           |
| BIOMOL | DL-381 | [C@]([H])([C@H](N(C)C)C(O)=C(C(=O)N)C1=O)[[C@@H](O)[C@@]([H])(C2=C3O)[C@@H](C)c(c4C2=O)cccc4O)[C@@]13O                                                                                                                                                                                                                                                                                                                                                                                                                                                                                                                                                                                                                                                                                                                                                                                                                                                                                                                                                                                                                                                                                                                                                                                                                                                                                                                                                                                                                                                                                                                                                                                                                                                                                                                                                                                                                                                                                                                                                                                                                                                                                                                                                                                                                                                                                                                                                                                                                                                                                                                                                                                                                                                                                                                                                                                                                                                                                                                                                                                                                                                                                                                                                                                                                                                                                                                                                                                                                                                                                                                                                                                                                                                                                                                                                                                                                                                                                                                                                                                                                                                                                                                                                                                                                                                                                                                                                                                                                                                                                                                                                                                                                                                                                                                                                                                                                                                                                                                                                                                                                                                                                                                                                                                                                                                                                                                                                                                                                                                                                                                                                                                                                                                                                                                                                                                                                                                                                                                                                                                                                                                                                                                                                                                                                                                                                                                                                                                                                                                                                                                                                                                                                                                                                                                                                                                                                                                                                                                                                                                                                                                                                                                                                                                                                                                                                                                                                                                                                                                                                                                                                                                                                                                                                                                                                                                                                                                                                                                                                                                                                                                                                                                                                                                                                                                                                                                                                                                                                                                                                                                                                                                                                                                                                                                                                                                                                             | C22H24N2O8     | 444.435 | Doxycycline HCl         |
| BIOMOL | DL-176 | C1[C@]2([H])N([C@@H](C(O)=O)C(C)(C)S2(=O)=O)C1=O                                                                                                                                                                                                                                                                                                                                                                                                                                                                                                                                                                                                                                                                                                                                                                                                                                                                                                                                                                                                                                                                                                                                                                                                                                                                                                                                                                                                                                                                                                                                                                                                                                                                                                                                                                                                                                                                                                                                                                                                                                                                                                                                                                                                                                                                                                                                                                                                                                                                                                                                                                                                                                                                                                                                                                                                                                                                                                                                                                                                                                                                                                                                                                                                                                                                                                                                                                                                                                                                                                                                                                                                                                                                                                                                                                                                                                                                                                                                                                                                                                                                                                                                                                                                                                                                                                                                                                                                                                                                                                                                                                                                                                                                                                                                                                                                                                                                                                                                                                                                                                                                                                                                                                                                                                                                                                                                                                                                                                                                                                                                                                                                                                                                                                                                                                                                                                                                                                                                                                                                                                                                                                                                                                                                                                                                                                                                                                                                                                                                                                                                                                                                                                                                                                                                                                                                                                                                                                                                                                                                                                                                                                                                                                                                                                                                                                                                                                                                                                                                                                                                                                                                                                                                                                                                                                                                                                                                                                                                                                                                                                                                                                                                                                                                                                                                                                                                                                                                                                                                                                                                                                                                                                                                                                                                                                                                                                                                                   | C8H11NO5S      | 233.242 | Sulbactam               |
| BIOMOL | PI-152 | N1(C(=O)[C@H](C)N[C@H](C(=O)O)CC)CCc2cccc2)CCC[C@H]1C(=O)O                                                                                                                                                                                                                                                                                                                                                                                                                                                                                                                                                                                                                                                                                                                                                                                                                                                                                                                                                                                                                                                                                                                                                                                                                                                                                                                                                                                                                                                                                                                                                                                                                                                                                                                                                                                                                                                                                                                                                                                                                                                                                                                                                                                                                                                                                                                                                                                                                                                                                                                                                                                                                                                                                                                                                                                                                                                                                                                                                                                                                                                                                                                                                                                                                                                                                                                                                                                                                                                                                                                                                                                                                                                                                                                                                                                                                                                                                                                                                                                                                                                                                                                                                                                                                                                                                                                                                                                                                                                                                                                                                                                                                                                                                                                                                                                                                                                                                                                                                                                                                                                                                                                                                                                                                                                                                                                                                                                                                                                                                                                                                                                                                                                                                                                                                                                                                                                                                                                                                                                                                                                                                                                                                                                                                                                                                                                                                                                                                                                                                                                                                                                                                                                                                                                                                                                                                                                                                                                                                                                                                                                                                                                                                                                                                                                                                                                                                                                                                                                                                                                                                                                                                                                                                                                                                                                                                                                                                                                                                                                                                                                                                                                                                                                                                                                                                                                                                                                                                                                                                                                                                                                                                                                                                                                                                                                                                                                                         | C20H28N2O5     | 376.447 | Enalapril               |
| BIOMOL | DL-143 | O                                                                                                                                                                                                                                                                                                                                                                                                                                                                                                                                                                                                                                                                                                                                                                                                                                                                                                                                                                                                                                                                                                                                                                                                                                                                                                                                                                                                                                                                                                                                                                                                                                                                                                                                                                                                                                                                                                                                                                                                                                                                                                                                                                                                                                                                                                                                                                                                                                                                                                                                                                                                                                                                                                                                                                                                                                                                                                                                                                                                                                                                                                                                                                                                                                                                                                                                                                                                                                                                                                                                                                                                                                                                                                                                                                                                                                                                                                                                                                                                                                                                                                                                                                                                                                                                                                                                                                                                                                                                                                                                                                                                                                                                                                                                                                                                                                                                                                                                                                                                                                                                                                                                                                                                                                                                                                                                                                                                                                                                                                                                                                                                                                                                                                                                                                                                                                                                                                                                                                                                                                                                                                                                                                                                                                                                                                                                                                                                                                                                                                                                                                                                                                                                                                                                                                                                                                                                                                                                                                                                                                                                                                                                                                                                                                                                                                                                                                                                                                                                                                                                                                                                                                                                                                                                                                                                                                                                                                                                                                                                                                                                                                                                                                                                                                                                                                                                                                                                                                                                                                                                                                                                                                                                                                                                                                                                                                                                                                                                  | C14H18Cl2N2O6S | 413.274 | Thiamphenicol glycinate |
| BIOMOL | DL-383 | c(nc(N1CCNCC1)c(F)c2)(N(CC)C=C(C(=O)O)C3=O)c23                                                                                                                                                                                                                                                                                                                                                                                                                                                                                                                                                                                                                                                                                                                                                                                                                                                                                                                                                                                                                                                                                                                                                                                                                                                                                                                                                                                                                                                                                                                                                                                                                                                                                                                                                                                                                                                                                                                                                                                                                                                                                                                                                                                                                                                                                                                                                                                                                                                                                                                                                                                                                                                                                                                                                                                                                                                                                                                                                                                                                                                                                                                                                                                                                                                                                                                                                                                                                                                                                                                                                                                                                                                                                                                                                                                                                                                                                                                                                                                                                                                                                                                                                                                                                                                                                                                                                                                                                                                                                                                                                                                                                                                                                                                                                                                                                                                                                                                                                                                                                                                                                                                                                                                                                                                                                                                                                                                                                                                                                                                                                                                                                                                                                                                                                                                                                                                                                                                                                                                                                                                                                                                                                                                                                                                                                                                                                                                                                                                                                                                                                                                                                                                                                                                                                                                                                                                                                                                                                                                                                                                                                                                                                                                                                                                                                                                                                                                                                                                                                                                                                                                                                                                                                                                                                                                                                                                                                                                                                                                                                                                                                                                                                                                                                                                                                                                                                                                                                                                                                                                                                                                                                                                                                                                                                                                                                                                                                     | C15H17FN4O3    | 320.319 | Enoxacin                |
| BIOMOL | DL-175 | c1(ccccc1Cl)C(O)CNC(C)(C)C                                                                                                                                                                                                                                                                                                                                                                                                                                                                                                                                                                                                                                                                                                                                                                                                                                                                                                                                                                                                                                                                                                                                                                                                                                                                                                                                                                                                                                                                                                                                                                                                                                                                                                                                                                                                                                                                                                                                                                                                                                                                                                                                                                                                                                                                                                                                                                                                                                                                                                                                                                                                                                                                                                                                                                                                                                                                                                                                                                                                                                                                                                                                                                                                                                                                                                                                                                                                                                                                                                                                                                                                                                                                                                                                                                                                                                                                                                                                                                                                                                                                                                                                                                                                                                                                                                                                                                                                                                                                                                                                                                                                                                                                                                                                                                                                                                                                                                                                                                                                                                                                                                                                                                                                                                                                                                                                                                                                                                                                                                                                                                                                                                                                                                                                                                                                                                                                                                                                                                                                                                                                                                                                                                                                                                                                                                                                                                                                                                                                                                                                                                                                                                                                                                                                                                                                                                                                                                                                                                                                                                                                                                                                                                                                                                                                                                                                                                                                                                                                                                                                                                                                                                                                                                                                                                                                                                                                                                                                                                                                                                                                                                                                                                                                                                                                                                                                                                                                                                                                                                                                                                                                                                                                                                                                                                                                                                                                                                         | C12H18ClNO     | 227.73  | Tulobuterol             |
| BIOMOL | DL-384 | c1(cc(N2CCN(CC)CC2)c(F)c3)c3C(=O)C(C(=O)O)=CN1C4CC4                                                                                                                                                                                                                                                                                                                                                                                                                                                                                                                                                                                                                                                                                                                                                                                                                                                                                                                                                                                                                                                                                                                                                                                                                                                                                                                                                                                                                                                                                                                                                                                                                                                                                                                                                                                                                                                                                                                                                                                                                                                                                                                                                                                                                                                                                                                                                                                                                                                                                                                                                                                                                                                                                                                                                                                                                                                                                                                                                                                                                                                                                                                                                                                                                                                                                                                                                                                                                                                                                                                                                                                                                                                                                                                                                                                                                                                                                                                                                                                                                                                                                                                                                                                                                                                                                                                                                                                                                                                                                                                                                                                                                                                                                                                                                                                                                                                                                                                                                                                                                                                                                                                                                                                                                                                                                                                                                                                                                                                                                                                                                                                                                                                                                                                                                                                                                                                                                                                                                                                                                                                                                                                                                                                                                                                                                                                                                                                                                                                                                                                                                                                                                                                                                                                                                                                                                                                                                                                                                                                                                                                                                                                                                                                                                                                                                                                                                                                                                                                                                                                                                                                                                                                                                                                                                                                                                                                                                                                                                                                                                                                                                                                                                                                                                                                                                                                                                                                                                                                                                                                                                                                                                                                                                                                                                                                                                                                                                | C19H22FN3O3    | 359.395 | Enrofloxacin            |
| BIOMOL | NP-461 | [C@]([CC1])([C@@H]2[C@]([O])(C(=O)O)C[C@H]3O)C(=O)C)(c4c(cc(O)C)c([C@]5(C)O)C(=O)C[C@]([H])(CN6Cc7c5[nH]c(c78)cccc8)C=C(C)CC6)c4)N2C)[C@@]1(N1CC=C9)[[C@]39CC)[H]                                                                                                                                                                                                                                                                                                                                                                                                                                                                                                                                                                                                                                                                                                                                                                                                                                                                                                                                                                                                                                                                                                                                                                                                                                                                                                                                                                                                                                                                                                                                                                                                                                                                                                                                                                                                                                                                                                                                                                                                                                                                                                                                                                                                                                                                                                                                                                                                                                                                                                                                                                                                                                                                                                                                                                                                                                                                                                                                                                                                                                                                                                                                                                                                                                                                                                                                                                                                                                                                                                                                                                                                                                                                                                                                                                                                                                                                                                                                                                                                                                                                                                                                                                                                                                                                                                                                                                                                                                                                                                                                                                                                                                                                                                                                                                                                                                                                                                                                                                                                                                                                                                                                                                                                                                                                                                                                                                                                                                                                                                                                                                                                                                                                                                                                                                                                                                                                                                                                                                                                                                                                                                                                                                                                                                                                                                                                                                                                                                                                                                                                                                                                                                                                                                                                                                                                                                                                                                                                                                                                                                                                                                                                                                                                                                                                                                                                                                                                                                                                                                                                                                                                                                                                                                                                                                                                                                                                                                                                                                                                                                                                                                                                                                                                                                                                                                                                                                                                                                                                                                                                                                                                                                                                                                                                                                  | C45H54N4O8     | 778.932 | Vinorelbine             |
| BIOMOL | DL-385 | [C@]1([H])(CC[C@]2(O)C#C)[C@]2(C)CC[C@]3([H])[C@@]1([H])CC(C(=C)[C@]3(C)CCC4=O                                                                                                                                                                                                                                                                                                                                                                                                                                                                                                                                                                                                                                                                                                                                                                                                                                                                                                                                                                                                                                                                                                                                                                                                                                                                                                                                                                                                                                                                                                                                                                                                                                                                                                                                                                                                                                                                                                                                                                                                                                                                                                                                                                                                                                                                                                                                                                                                                                                                                                                                                                                                                                                                                                                                                                                                                                                                                                                                                                                                                                                                                                                                                                                                                                                                                                                                                                                                                                                                                                                                                                                                                                                                                                                                                                                                                                                                                                                                                                                                                                                                                                                                                                                                                                                                                                                                                                                                                                                                                                                                                                                                                                                                                                                                                                                                                                                                                                                                                                                                                                                                                                                                                                                                                                                                                                                                                                                                                                                                                                                                                                                                                                                                                                                                                                                                                                                                                                                                                                                                                                                                                                                                                                                                                                                                                                                                                                                                                                                                                                                                                                                                                                                                                                                                                                                                                                                                                                                                                                                                                                                                                                                                                                                                                                                                                                                                                                                                                                                                                                                                                                                                                                                                                                                                                                                                                                                                                                                                                                                                                                                                                                                                                                                                                                                                                                                                                                                                                                                                                                                                                                                                                                                                                                                                                                                                                                                     | C21H28O2       | 312.446 | Ethisterone             |
| BIOMOL | DL-220 | [C@]([CC1)(c2c(cc(O)C)[[C@@]3(C(=O)O)C(C)[C@]4([H])CN(C[C@]([O])(C)C4)CCc5c3[nH]c(c56)cccc6)c2)N7C)([C@]7([H])[C@@]([O])(C(=O)N)[C@@H]8O)[C@@]([H])(N1CC=C9)[C@]89CC                                                                                                                                                                                                                                                                                                                                                                                                                                                                                                                                                                                                                                                                                                                                                                                                                                                                                                                                                                                                                                                                                                                                                                                                                                                                                                                                                                                                                                                                                                                                                                                                                                                                                                                                                                                                                                                                                                                                                                                                                                                                                                                                                                                                                                                                                                                                                                                                                                                                                                                                                                                                                                                                                                                                                                                                                                                                                                                                                                                                                                                                                                                                                                                                                                                                                                                                                                                                                                                                                                                                                                                                                                                                                                                                                                                                                                                                                                                                                                                                                                                                                                                                                                                                                                                                                                                                                                                                                                                                                                                                                                                                                                                                                                                                                                                                                                                                                                                                                                                                                                                                                                                                                                                                                                                                                                                                                                                                                                                                                                                                                                                                                                                                                                                                                                                                                                                                                                                                                                                                                                                                                                                                                                                                                                                                                                                                                                                                                                                                                                                                                                                                                                                                                                                                                                                                                                                                                                                                                                                                                                                                                                                                                                                                                                                                                                                                                                                                                                                                                                                                                                                                                                                                                                                                                                                                                                                                                                                                                                                                                                                                                                                                                                                                                                                                                                                                                                                                                                                                                                                                                                                                                                                                                                                                                               | C43H55N5O7     | 753.926 | Vindesine               |
| BIOMOL | DL-386 | c(cc(O)cc1)(nc(S(=O)Cc2ncc(C)C(O)C)c2C)[nH]3)c13                                                                                                                                                                                                                                                                                                                                                                                                                                                                                                                                                                                                                                                                                                                                                                                                                                                                                                                                                                                                                                                                                                                                                                                                                                                                                                                                                                                                                                                                                                                                                                                                                                                                                                                                                                                                                                                                                                                                                                                                                                                                                                                                                                                                                                                                                                                                                                                                                                                                                                                                                                                                                                                                                                                                                                                                                                                                                                                                                                                                                                                                                                                                                                                                                                                                                                                                                                                                                                                                                                                                                                                                                                                                                                                                                                                                                                                                                                                                                                                                                                                                                                                                                                                                                                                                                                                                                                                                                                                                                                                                                                                                                                                                                                                                                                                                                                                                                                                                                                                                                                                                                                                                                                                                                                                                                                                                                                                                                                                                                                                                                                                                                                                                                                                                                                                                                                                                                                                                                                                                                                                                                                                                                                                                                                                                                                                                                                                                                                                                                                                                                                                                                                                                                                                                                                                                                                                                                                                                                                                                                                                                                                                                                                                                                                                                                                                                                                                                                                                                                                                                                                                                                                                                                                                                                                                                                                                                                                                                                                                                                                                                                                                                                                                                                                                                                                                                                                                                                                                                                                                                                                                                                                                                                                                                                                                                                                                                                   | C17H19N3O3S    | 345.416 | Esomeprazole potassium  |
| BIOMOL | DL-210 | c1(C(O)CNCCCCCO)CCCC2cccc2)ccc(O)c(CO)c1                                                                                                                                                                                                                                                                                                                                                                                                                                                                                                                                                                                                                                                                                                                                                                                                                                                                                                                                                                                                                                                                                                                                                                                                                                                                                                                                                                                                                                                                                                                                                                                                                                                                                                                                                                                                                                                                                                                                                                                                                                                                                                                                                                                                                                                                                                                                                                                                                                                                                                                                                                                                                                                                                                                                                                                                                                                                                                                                                                                                                                                                                                                                                                                                                                                                                                                                                                                                                                                                                                                                                                                                                                                                                                                                                                                                                                                                                                                                                                                                                                                                                                                                                                                                                                                                                                                                                                                                                                                                                                                                                                                                                                                                                                                                                                                                                                                                                                                                                                                                                                                                                                                                                                                                                                                                                                                                                                                                                                                                                                                                                                                                                                                                                                                                                                                                                                                                                                                                                                                                                                                                                                                                                                                                                                                                                                                                                                                                                                                                                                                                                                                                                                                                                                                                                                                                                                                                                                                                                                                                                                                                                                                                                                                                                                                                                                                                                                                                                                                                                                                                                                                                                                                                                                                                                                                                                                                                                                                                                                                                                                                                                                                                                                                                                                                                                                                                                                                                                                                                                                                                                                                                                                                                                                                                                                                                                                                                                           | C25H37NO4      | 415.566 | Salmeterol              |
| BIOMOL | BL-093 | [C@]1([H])(CC[C@H]2O)[C@]2(C)CC[C@]3([H])[C@@]1([H])CCc4c3ccc(O)c4                                                                                                                                                                                                                                                                                                                                                                                                                                                                                                                                                                                                                                                                                                                                                                                                                                                                                                                                                                                                                                                                                                                                                                                                                                                                                                                                                                                                                                                                                                                                                                                                                                                                                                                                                                                                                                                                                                                                                                                                                                                                                                                                                                                                                                                                                                                                                                                                                                                                                                                                                                                                                                                                                                                                                                                                                                                                                                                                                                                                                                                                                                                                                                                                                                                                                                                                                                                                                                                                                                                                                                                                                                                                                                                                                                                                                                                                                                                                                                                                                                                                                                                                                                                                                                                                                                                                                                                                                                                                                                                                                                                                                                                                                                                                                                                                                                                                                                                                                                                                                                                                                                                                                                                                                                                                                                                                                                                                                                                                                                                                                                                                                                                                                                                                                                                                                                                                                                                                                                                                                                                                                                                                                                                                                                                                                                                                                                                                                                                                                                                                                                                                                                                                                                                                                                                                                                                                                                                                                                                                                                                                                                                                                                                                                                                                                                                                                                                                                                                                                                                                                                                                                                                                                                                                                                                                                                                                                                                                                                                                                                                                                                                                                                                                                                                                                                                                                                                                                                                                                                                                                                                                                                                                                                                                                                                                                                                                 | C18H24O2       | 272.382 | Estradiol               |
| BIOMOL | T-117  | c1([nH]c(c23)cccc2)c3CCN(C[C@]([CC](O)C4)[C@]4(C)[C@]1(C(=O)O)C)c5c(O)c6cc([C@@]7([C@@]8([H])N6C=O)[C@]([N9CC7]([H])[C@]([C=CC9)CC)[C@@H](O)C(C)=O)[C@]8(O)C(O)C(=O)c5)[H]                                                                                                                                                                                                                                                                                                                                                                                                                                                                                                                                                                                                                                                                                                                                                                                                                                                                                                                                                                                                                                                                                                                                                                                                                                                                                                                                                                                                                                                                                                                                                                                                                                                                                                                                                                                                                                                                                                                                                                                                                                                                                                                                                                                                                                                                                                                                                                                                                                                                                                                                                                                                                                                                                                                                                                                                                                                                                                                                                                                                                                                                                                                                                                                                                                                                                                                                                                                                                                                                                                                                                                                                                                                                                                                                                                                                                                                                                                                                                                                                                                                                                                                                                                                                                                                                                                                                                                                                                                                                                                                                                                                                                                                                                                                                                                                                                                                                                                                                                                                                                                                                                                                                                                                                                                                                                                                                                                                                                                                                                                                                                                                                                                                                                                                                                                                                                                                                                                                                                                                                                                                                                                                                                                                                                                                                                                                                                                                                                                                                                                                                                                                                                                                                                                                                                                                                                                                                                                                                                                                                                                                                                                                                                                                                                                                                                                                                                                                                                                                                                                                                                                                                                                                                                                                                                                                                                                                                                                                                                                                                                                                                                                                                                                                                                                                                                                                                                                                                                                                                                                                                                                                                                                                                                                                                                         | C46H56N4O10    | 824.958 | Vincristine sulfate     |
| BIOMOL | DL-388 | [C@]1([H])(C[C@H](O)[C@@H]2O)[C@]2(C)CC[C@]3([H])[C@@]1([H])CCc4c3ccc(O)c4                                                                                                                                                                                                                                                                                                                                                                                                                                                                                                                                                                                                                                                                                                                                                                                                                                                                                                                                                                                                                                                                                                                                                                                                                                                                                                                                                                                                                                                                                                                                                                                                                                                                                                                                                                                                                                                                                                                                                                                                                                                                                                                                                                                                                                                                                                                                                                                                                                                                                                                                                                                                                                                                                                                                                                                                                                                                                                                                                                                                                                                                                                                                                                                                                                                                                                                                                                                                                                                                                                                                                                                                                                                                                                                                                                                                                                                                                                                                                                                                                                                                                                                                                                                                                                                                                                                                                                                                                                                                                                                                                                                                                                                                                                                                                                                                                                                                                                                                                                                                                                                                                                                                                                                                                                                                                                                                                                                                                                                                                                                                                                                                                                                                                                                                                                                                                                                                                                                                                                                                                                                                                                                                                                                                                                                                                                                                                                                                                                                                                                                                                                                                                                                                                                                                                                                                                                                                                                                                                                                                                                                                                                                                                                                                                                                                                                                                                                                                                                                                                                                                                                                                                                                                                                                                                                                                                                                                                                                                                                                                                                                                                                                                                                                                                                                                                                                                                                                                                                                                                                                                                                                                                                                                                                                                                                                                                                                         | C18H24O3       | 288.381 | Estriol                 |
| BIOMOL | DL-312 | c(ccc(O)C)c1)(n(C(=O)c2ccc(Cl)cc2)c(C)c3CC(=O)O)CC(=O)O)c13                                                                                                                                                                                                                                                                                                                                                                                                                                                                                                                                                                                                                                                                                                                                                                                                                                                                                                                                                                                                                                                                                                                                                                                                                                                                                                                                                                                                                                                                                                                                                                                                                                                                                                                                                                                                                                                                                                                                                                                                                                                                                                                                                                                                                                                                                                                                                                                                                                                                                                                                                                                                                                                                                                                                                                                                                                                                                                                                                                                                                                                                                                                                                                                                                                                                                                                                                                                                                                                                                                                                                                                                                                                                                                                                                                                                                                                                                                                                                                                                                                                                                                                                                                                                                                                                                                                                                                                                                                                                                                                                                                                                                                                                                                                                                                                                                                                                                                                                                                                                                                                                                                                                                                                                                                                                                                                                                                                                                                                                                                                                                                                                                                                                                                                                                                                                                                                                                                                                                                                                                                                                                                                                                                                                                                                                                                                                                                                                                                                                                                                                                                                                                                                                                                                                                                                                                                                                                                                                                                                                                                                                                                                                                                                                                                                                                                                                                                                                                                                                                                                                                                                                                                                                                                                                                                                                                                                                                                                                                                                                                                                                                                                                                                                                                                                                                                                                                                                                                                                                                                                                                                                                                                                                                                                                                                                                                                                                        | C21H18ClNO6    | 415.824 | Acemetacin              |
| BIOMOL | BL-090 | [C@]1([H])(CCC2=O)[C@]2(C)CC[C@]3([H])[C@@]1([H])CCc4c3ccc(O)c4                                                                                                                                                                                                                                                                                                                                                                                                                                                                                                                                                                                                                                                                                                                                                                                                                                                                                                                                                                                                                                                                                                                                                                                                                                                                                                                                                                                                                                                                                                                                                                                                                                                                                                                                                                                                                                                                                                                                                                                                                                                                                                                                                                                                                                                                                                                                                                                                                                                                                                                                                                                                                                                                                                                                                                                                                                                                                                                                                                                                                                                                                                                                                                                                                                                                                                                                                                                                                                                                                                                                                                                                                                                                                                                                                                                                                                                                                                                                                                                                                                                                                                                                                                                                                                                                                                                                                                                                                                                                                                                                                                                                                                                                                                                                                                                                                                                                                                                                                                                                                                                                                                                                                                                                                                                                                                                                                                                                                                                                                                                                                                                                                                                                                                                                                                                                                                                                                                                                                                                                                                                                                                                                                                                                                                                                                                                                                                                                                                                                                                                                                                                                                                                                                                                                                                                                                                                                                                                                                                                                                                                                                                                                                                                                                                                                                                                                                                                                                                                                                                                                                                                                                                                                                                                                                                                                                                                                                                                                                                                                                                                                                                                                                                                                                                                                                                                                                                                                                                                                                                                                                                                                                                                                                                                                                                                                                                                                    | C18H22O2       | 270.366 | Estrone                 |
| BIOMOL | DL-459 | c(cc(N1CCNCC1)c(F)c2)(N(CC)C=C(C(=O)O)C3=O)c23                                                                                                                                                                                                                                                                                                                                                                                                                                                                                                                                                                                                                                                                                                                                                                                                                                                                                                                                                                                                                                                                                                                                                                                                                                                                                                                                                                                                                                                                                                                                                                                                                                                                                                                                                                                                                                                                                                                                                                                                                                                                                                                                                                                                                                                                                                                                                                                                                                                                                                                                                                                                                                                                                                                                                                                                                                                                                                                                                                                                                                                                                                                                                                                                                                                                                                                                                                                                                                                                                                                                                                                                                                                                                                                                                                                                                                                                                                                                                                                                                                                                                                                                                                                                                                                                                                                                                                                                                                                                                                                                                                                                                                                                                                                                                                                                                                                                                                                                                                                                                                                                                                                                                                                                                                                                                                                                                                                                                                                                                                                                                                                                                                                                                                                                                                                                                                                                                                                                                                                                                                                                                                                                                                                                                                                                                                                                                                                                                                                                                                                                                                                                                                                                                                                                                                                                                                                                                                                                                                                                                                                                                                                                                                                                                                                                                                                                                                                                                                                                                                                                                                                                                                                                                                                                                                                                                                                                                                                                                                                                                                                                                                                                                                                                                                                                                                                                                                                                                                                                                                                                                                                                                                                                                                                                                                                                                                                                                     | C16H18FN3O3    | 319.331 | Norfloracin             |
| BIOMOL | DL-529 | C1(O)(CCCCC1)C(CN(C)C)c2ccc(O)cc2                                                                                                                                                                                                                                                                                                                                                                                                                                                                                                                                                                                                                                                                                                                                                                                                                                                                                                                                                                                                                                                                                                                                                                                                                                                                                                                                                                                                                                                                                                                                                                                                                                                                                                                                                                                                                                                                                                                                                                                                                                                                                                                                                                                                                                                                                                                                                                                                                                                                                                                                                                                                                                                                                                                                                                                                                                                                                                                                                                                                                                                                                                                                                                                                                                                                                                                                                                                                                                                                                                                                                                                                                                                                                                                                                                                                                                                                                                                                                                                                                                                                                                                                                                                                                                                                                                                                                                                                                                                                                                                                                                                                                                                                                                                                                                                                                                                                                                                                                                                                                                                                                                                                                                                                                                                                                                                                                                                                                                                                                                                                                                                                                                                                                                                                                                                                                                                                                                                                                                                                                                                                                                                                                                                                                                                                                                                                                                                                                                                                                                                                                                                                                                                                                                                                                                                                                                                                                                                                                                                                                                                                                                                                                                                                                                                                                                                                                                                                                                                                                                                                                                                                                                                                                                                                                                                                                                                                                                                                                                                                                                                                                                                                                                                                                                                                                                                                                                                                                                                                                                                                                                                                                                                                                                                                                                                                                                                                                                  | C17H27NO2      | 277.402 | Venlafaxine HCl         |
| BIOMOL | DL-460 | [C@H]1(O)[C@H](C)[C@@H](O)[C@H](N)[C@@H]1O)O)C2)C=C)C1C=C)C1C=C)C1C=C)C1C=C)C1C=C)C1C=C)C1C=C)C1C=C)C1C=C)C1C=C)C1C=C)C1C=C)C1C=C)C1C=C)C1C=C)C1C=C)C1C=C)C1C=C)C1C=C)C1C=C)C1C=C)C1C=C)C1C=C)C1C=C)C1C=C)C1C=C)C1C=C)C1C=C)C1C=C)C1C=C)C1C=C)C1C=C)C1C=C)C1C=C)C1C=C)C1C=C)C1C=C)C1C=C)C1C=C)C1C=C)C1C=C)C1C=C)C1C=C)C1C=C)C1C=C)C1C=C)C1C=C)C1C=C)C1C=C)C1C=C)C1C=C)C1C=C)C1C=C)C1C=C)C1C=C)C1C=C)C1C=C)C1C=C)C1C=C)C1C=C)C1C=C)C1C=C)C1C=C)C1C=C)C1C=C)C1C=C)C1C=C)C1C=C)C1C=C)C1C=C)C1C=C)C1C=C)C1C=C)C1C=C)C1C=C)C1C=C)C1C=C)C1C=C)C1C=C)C1C=C)C1C=C)C1C=C)C1C=C)C1C=C)C1C=C)C1C=C)C1C=C)C1C=C)C1C=C)C1C=C)C1C=C)C1C=C)C1C=C)C1C=C)C1C=C)C1C=C)C1C=C)C1C=C)C1C=C)C1C=C)C1C=C)C1C=C)C1C=C)C1C=C)C1C=C)C1C=C)C1C=C)C1C=C)C1C=C)C1C=C)C1C=C)C1C=C)C1C=C)C1C=C)C1C=C)C1C=C)C1C=C)C1C=C)C1C=C)C1C=C)C1C=C)C1C=C)C1C=C)C1C=C)C1C=C)C1C=C)C1C=C)C1C=C)C1C=C)C1C=C)C1C=C)C1C=C)C1C=C)C1C=C)C1C=C)C1C=C)C1C=C)C1C=C)C1C=C)C1C=C)C1C=C)C1C=C)C1C=C)C1C=C)C1C=C)C1C=C)C1C=C)C1C=C)C1C=C)C1C=C)C1C=C)C1C=C)C1C=C)C1C=C)C1C=C)C1C=C)C1C=C)C1C=C)C1C=C)C1C=C)C1C=C)C1C=C)C1C=C)C1C=C)C1C=C)C1C=C)C1C=C)C1C=C)C1C=C)C1C=C)C1C=C)C1C=C)C1C=C)C1C=C)C1C=C)C1C=C)C1C=C)C1C=C)C1C=C)C1C=C)C1C=C)C1C=C)C1C=C)C1C=C)C1C=C)C1C=C)C1C=C)C1C=C)C1C=C)C1C=C)C1C=C)C1C=C)C1C=C)C1C=C)C1C=C)C1C=C)C1C=C)C1C=C)C1C=C)C1C=C)C1C=C)C1C=C)C1C=C)C1C=C)C1C=C)C1C=C)C1C=C)C1C=C)C1C=C)C1C=C)C1C=C)C1C=C)C1C=C)C1C=C)C1C=C)C1C=C)C1C=C)C1C=C)C1C=C)C1C=C)C1C=C)C1C=C)C1C=C)C1C=C)C1C=C)C1C=C)C1C=C)C1C=C)C1C=C)C1C=C)C1C=C)C1C=C)C1C=C)C1C=C)C1C=C)C1C=C)C1C=C)C1C=C)C1C=C)C1C=C)C1C=C)C1C=C)C1C=C)C1C=C)C1C=C)C1C=C)C1C=C)C1C=C)C1C=C)C1C=C)C1C=C)C1C=C)C1C=C)C1C=C)C1C=C)C1C=C)C1C=C)C1C=C)C1C=C)C1C=C)C1C=C)C1C=C)C1C=C)C1C=C)C1C=C)C1C=C)C1C=C)C1C=C)C1C=C)C1C=C)C1C=C)C1C=C)C1C=C)C1C=C)C1C=C)C1C=C)C1C=C)C1C=C)C1C=C)C1C=C)C1C=C)C1C=C)C1C=C)C1C=C)C1C=C)C1C=C)C1C=C)C1C=C)C1C=C)C1C=C)C1C=C)C1C=C)C1C=C)C1C=C)C1C=C)C1C=C)C1C=C)C1C=C)C1C=C)C1C=C)C1C=C)C1C=C)C1C=C)C1C=C)C1C=C)C1C=C)C1C=C)C1C=C)C1C=C)C1C=C)C1C=C)C1C=C)C1C=C)C1C=C)C1C=C)C1C=C)C1C=C)C1C=C)C1C=C)C1C=C)C1C=C)C1C=C)C1C=C)C1C=C)C1C=C)C1C=C)C1C=C)C1C=C)C1C=C)C1C=C)C1C=C)C1C=C)C1C=C)C1C=C)C1C=C)C1C=C)C1C=C)C1C=C)C1C=C)C1C=C)C1C=C)C1C=C)C1C=C)C1C=C)C1C=C)C1C=C)C1C=C)C1C=C)C1C=C)C1C=C)C1C=C)C1C=C)C1C=C)C1C=C)C1C=C)C1C=C)C1C=C)C1C=C)C1C=C)C1C=C)C1C=C)C1C=C)C1C=C)C1C=C)C1C=C)C1C=C)C1C=C)C1C=C)C1C=C)C1C=C)C1C=C)C1C=C)C1C=C)C1C=C)C1C=C)C1C=C)C1C=C)C1C=C)C1C=C)C1C=C)C1C=C)C1C=C)C1C=C)C1C=C)C1C=C)C1C=C)C1C=C)C1C=C)C1C=C)C1C=C)C1C=C)C1C=C)C1C=C)C1C=C)C1C=C)C1C=C)C1C=C)C1C=C)C1C=C)C1C=C)C1C=C)C1C=C)C1C=C)C1C=C)C1C=C)C1C=C)C1C=C)C1C=C)C1C=C)C1C=C)C1C=C)C1C=C)C1C=C)C1C=C)C1C=C)C1C=C)C1C=C)C1C=C)C1C=C)C1C=C)C1C=C)C1C=C)C1C=C)C1C=C)C1C=C)C1C=C)C1C=C)C1C=C)C1C=C)C1C=C)C1C=C)C1C=C)C1C=C)C1C=C)C1C=C)C1C=C)C1C=C)C1C=C)C1C=C)C1C=C)C1C=C)C1C=C)C1C=C)C1C=C)C1C=C)C1C=C)C1C=C)C1C=C)C1C=C)C1C=C)C1C=C)C1C=C)C1C=C)C1C=C)C1C=C)C1C=C)C1C=C)C1C=C)C1C=C)C1C=C)C1C=C)C1C=C)C1C=C)C1C=C)C1C=C)C1C=C)C1C=C)C1C=C)C1C=C)C1C=C)C1C=C)C1C=C)C1C=C)C1C=C)C1C=C)C1C=C)C1C=C)C1C=C)C1C=C)C1C=C)C1C=C)C1C=C)C1C=C)C1C=C)C1C=C)C1C=C)C1C=C)C1C=C)C1C=C)C1C=C)C1C=C)C1C=C)C1C=C)C1C=C)C1C=C)C1C=C)C1C=C)C1C=C)C1C=C)C1C=C)C1C=C)C1C=C)C1C=C)C1C=C)C1C=C)C1C=C)C1C=C)C1C=C)C1C=C)C1C=C)C1C=C)C1C=C)C1C=C)C1C=C)C1C=C)C1C=C)C1C=C)C1C=C)C1C=C)C1C=C)C1C=C)C1C=C)C1C=C)C1C=C)C1C=C)C1C=C)C1C=C)C1C=C)C1C=C)C1C=C)C1C=C)C1C=C)C1C=C)C1C=C)C1C=C)C1C=C)C1C=C)C1C=C)C1C=C)C1C=C)C1C=C)C1C=C)C1C=C)C1C=C)C1C=C)C1C=C)C1C=C)C1C=C)C1C=C)C1C=C)C1C=C)C1C=C)C1C=C)C1C=C)C1C=C)C1C=C)C1C=C)C1C=C)C1C=C)C1C=C)C1C=C)C1C=C)C1C=C)C1C=C)C1C=C)C1C=C)C1C=C)C1C=C)C1C=C)C1C=C)C1C=C)C1C=C)C1C=C)C1C=C)C1C=C)C1C=C)C1C=C)C1C=C)C1C=C)C1C=C)C1C=C)C1C=C)C1C=C)C1C=C)C1C=C)C1C=C)C1C=C)C1C=C)C1C=C)C1C=C)C1C=C)C1C=C)C1C=C)C1C=C)C1C=C)C1C=C)C1C=C)C1C=C)C1C=C)C1C=C)C1C=C)C1C=C)C1C=C)C1C=C)C1C=C)C1C=C)C1C=C)C1C=C)C1C=C)C1C=C)C1C=C)C1C=C)C1C=C)C1C=C)C1C=C)C1C=C)C1C=C)C1C=C)C1C=C)C1C=C)C1C=C)C1C=C)C1C=C)C1C=C)C1C=C)C1C=C)C1C=C)C1C=C)C1C=C)C1C=C)C1C=C)C1C=C)C1C=C)C1C=C)C1C=C)C1C=C)C1C=C)C1C=C)C1C=C)C1C=C)C1C=C)C1C=C)C1C=C)C1C=C)C1C=C)C1C=C)C1C=C)C1C=C)C1C=C)C1C=C)C1C=C)C1C=C)C1C=C)C1C=C)C1C=C)C1C=C)C1C=C)C1C=C)C1C=C)C1C=C)C1C=C)C1C=C)C1C=C)C1C=C)C1C=C)C1C=C)C1C=C)C1C=C)C1C=C)C1C=C)C1C=C)C1C=C)C1C=C)C1C=C)C1C=C)C1C=C)C1C=C)C1C=C)C1C=C)C1C=C)C1C=C)C1C=C)C1C=C)C1C=C)C1C=C)C1C=C)C1C=C)C1C=C)C1C=C)C1C=C)C1C=C)C1C=C)C1C=C)C1C=C)C1C=C)C1C=C)C1C=C)C1C=C)C1C=C)C1C=C)C1C=C)C1C=C)C1C=C)C1C=C)C1C=C)C1C=C)C1C=C)C1C=C)C1C=C)C1C=C)C1C=C)C1C=C)C1C=C)C1C=C)C1C=C)C1C=C)C1C=C)C1C=C)C1C=C)C1C=C)C1C=C)C1C=C)C1C=C)C1C=C)C1C=C)C1C=C)C1C=C)C1C=C)C1C=C)C1C=C)C1C=C)C1C=C)C1C=C)C1C=C)C1C=C)C1C=C)C1C=C)C1C=C)C1C=C)C1C=C)C1C=C)C1C=C)C1C=C)C1C=C)C1C=C)C1C=C)C1C=C)C1C=C)C1C=C)C1C=C)C1C=C)C1C=C)C1C=C)C1C=C)C1C=C)C1C=C)C1C=C)C1C=C)C1C=C)C1C=C)C1C=C)C1C=C)C1C=C)C1C=C)C1C=C)C1C=C)C1C=C)C1C=C)C1C=C)C1C=C)C1C=C)C1C=C)C1C=C)C1C=C)C1C=C)C1C=C)C1C=C)C1C=C)C1C=C)C1C=C)C1C=C)C1C=C)C1C=C)C1C=C)C1C=C)C1C=C)C1C=C)C1C=C)C1C=C)C1C=C)C1C=C)C1C=C)C1C=C)C1C=C)C1C=C)C1C=C)C1C=C)C1C=C)C1C=C)C1C=C)C1C=C)C1C=C)C1C=C)C1C=C)C1C=C)C1C=C)C1C=C)C1C=C)C1C=C)C1C=C)C1C=C)C1C=C)C1C=C)C1C=C)C1C=C)C1C=C)C1C=C)C1C=C)C1C=C)C1C=C)C1C=C)C1C=C)C1C=C)C1C=C)C1C=C)C1C=C)C1C=C)C1C=C)C1C=C)C1C=C)C1C=C)C1C=C)C1C=C)C1C=C)C1C=C)C1C=C)C1C=C)C1C=C)C1C=C)C1C=C)C1C=C)C1C=C)C1C=C)C1C=C)C1C=C)C1C=C)C1C=C)C1C=C)C1C=C)C1C=C)C1C=C)C1C=C)C1C=C)C1C=C)C1C=C)C1C=C)C1C=C)C1C=C)C1C=C)C1C=C)C1C=C)C1C=C)C1C=C)C1C=C)C1C=C)C1C=C)C1C=C)C1C=C)C1C=C)C1C=C)C1C=C)C1C=C)C1C=C)C1C=C)C1C=C)C1C=C)C1C=C)C1C=C)C1C=C)C1C=C)C1C=C)C1C=C)C1C=C)C1C=C)C1C=C)C1C=C)C1C=C)C1C=C)C1C=C)C1C=C)C1C=C)C1C=C)C1C=C)C1C=C)C1C=C)C1C=C)C1C=C)C1C=C)C1C=C)C1C=C)C1C=C)C1C=C)C1C=C)C1C=C)C1C=C)C1C=C)C1C=C)C1C=C)C1C=C)C1C=C)C1C=C)C1C=C)C1C=C)C1C=C)C1C=C)C1C=C)C1C=C)C1C=C)C1C=C)C1C=C)C1C=C)C1C=C)C1C=C)C1C=C)C1C=C)C1C=C)C1C=C)C1C=C)C1C=C)C1C=C)C1C=C)C1C=C)C1C=C)C1C=C)C1C=C)C1C=C)C1C=C)C1C=C)C1C=C)C1C=C)C1C=C)C1C=C)C1C=C)C1C=C)C1C=C)C1C=C)C1C=C)C1C=C)C1C=C)C1C=C)C1C=C)C1C=C)C1C=C)C1C=C)C1C=C)C1C=C)C1C=C)C1C=C)C1C=C)C1C=C)C1C=C)C1C=C)C1C=C)C1C=C)C1C=C)C1C=C)C1C=C)C1C=C)C1C=C)C1C=C)C1C=C)C1C=C)C1C=C)C1C=C)C1C=C)C1C=C)C1C=C)C1C=C)C1C=C)C1C=C)C1C=C)C1C=C)C1C=C)C1C=C)C1C=C)C1C=C)C1C=C)C1C=C)C1C=C)C1C=C)C1C=C)C1C=C)C1C=C)C1C=C)C1C=C)C1C=C)C1C=C)C1C=C)C1C=C)C1C=C)C1C=C)C1C=C)C1C=C)C1C=C)C1C=C)C1C=C)C1C=C)C1C=C)C1C=C)C1C=C)C1C=C)C1C=C)C1C=C)C1C=C)C1C=C)C1C=C)C1C=C)C1C=C)C1C=C)C1C=C)C1C=C)C1C=C)C1C=C)C1C=C)C1C=C)C1C=C)C1C=C)C1C=C)C1C=C)C1C=C)C1C=C)C1C=C)C1C=C)C1C=C)C1C=C)C1C=C)C1C=C)C1C=C)C1C=C)C1C=C)C1C=C)C1C=C)C1C=C)C1C=C)C1C=C)C1C=C)C1C=C)C1C=C)C1C=C)C1C=C)C1C=C)C1C=C)C1C=C)C1C=C)C1C=C)C1C=C)C1C=C)C1C=C)C1C=C)C1C=C)C1C=C)C1C=C)C1C=C)C1C=C)C1C=C)C1C=C)C1C=C)C1C=C)C1C=C)C1C=C)C1C=C)C1C=C)C1C=C)C1C=C)C1C=C)C1C=C)C1C=C)C1C=C)C1C=C)C1C=C)C1C=C)C1C=C)C1C=C)C1C=C)C1C=C)C1C=C)C1C=C)C1C=C)C1C=C)C1C=C)C1C=C)C1C=C)C1C=C)C1C=C)C1C=C)C1C=C)C1C=C)C1C=C)C1C=C)C1C=C)C1C=C)C1C=C)C1C=C)C1C=C)C1C=C)C1C=C)C1C=C)C1C=C)C1C=C)C1C=C)C1C=C)C1C=C)C1C=C)C1C=C)C1C=C)C1C=C)C1C=C)C1C=C)C1C=C)C1C=C)C1C=C)C1C=C)C1C=C)C1C=C)C1C=C)C1C=C)C1C=C)C1C=C)C1C=C)C1C=C)C1C=C)C1C=C)C1C=C)C1C=C)C1C=C)C1C=C)C1C=C)C1C=C)C1C=C)C1C=C)C1C=C)C1C=C)C1C=C)C1C=C)C1C=C)C1C=C)C1C=C)C1C=C)C1C=C)C1C=C)C1C=C)C1C=C)C1C=C)C1C=C)C1C=C)C1C=C)C1C=C)C1C=C)C1C=C)C1C=C)C1C=C)C1C=C)C1C=C)C1C=C)C1C=C)C1C=C)C1C=C)C1C=C)C1C=C)C1C=C)C1C=C)C1C=C)C1C=C)C1C=C)C1C=C)C1C=C)C1C=C)C1C=C)C1C=C)C1C=C)C1C=C)C1C=C)C1C=C)C1C=C)C1C=C)C1C=C)C1C=C)C1C=C)C1C=C)C1C=C)C1C=C)C1C=C)C1C=C)C1C=C)C1C=C)C1C=C)C1C=C)C1C=C)C1C=C)C1C=C)C1C=C)C1C=C)C1C=C)C1C=C)C1C=C)C1C=C)C1C=C)C1C=C)C1C=C)C1C=C)C1C=C)C1C=C)C1C=C)C1C=C)C1C=C)C1C=C)C1C=C)C1C=C)C1C=C)C1C=C)C1C=C)C1C=C)C1C=C)C1C=C)C1C=C)C1C=C)C1C=C)C1C=C)C1C=C)C1C=C)C1C=C)C1C=C)C1C=C)C1C=C)C1C=C)C1C=C)C1C=C)C1C=C)C1C=C)C1C=C)C1C=C)C1C=C)C1C=C)C1C=C)C1C=C)C1C=C)C1C=C)C1C=C)C1C=C)C1C=C)C1C=C)C1C=C)C1C=C)C1C=C)C1C=C)C1C=C)C1C=C)C1C=C)C1C=C)C1C=C)C1C=C)C1C=C)C1C=C)C1C=C)C1C=C)C1C=C)C1C=C)C1C=C)C1C=C)C1C=C)C1C=C)C1C=C)C1C=C)C1C=C)C1C=C)C1C=C)C1C=C)C1C=C)C1C=C)C1C=C)C1C=C)C1C=C)C1C=C)C1C=C)C1C=C)C1C=C)C1C=C)C1C=C)C1C=C)C1C=C)C1C=C)C1C=C)C1C=C)C1C=C)C1C=C)C1C=C)C1C=C)C1C=C)C1C=C)C1C=C)C1C=C)C1C=C)C1C=C)C1C=C)C1C=C)C1C=C)C1C=C)C1C=C)C1C=C)C1C=C)C1C=C)C1C=C)C1C=C)C1C=C)C1C=C)C1C=C)C1C=C)C1C=C)C1C=C)C1C=C)C1C=C)C1C=C)C1C=C)C1C=C)C1C=C)C1C=C)C1C=C)C1C=C)C1C=C)C1C=C)C1C=C)C1C=C)C1C=C)C1C=C)C1C=C)C1C=C)C1C=C)C1C=C)C1C=C)C1C=C)C1C=C)C1C=C)C1C=C)C1C=C)C1C=C)C1C=C)C1C=C)C1C=C)C1C=C)C1C=C)C1C=C)C1C=C)C1C=C)C1C=C)C1C=C)C1C=C)C1C=C)C1C=C)C1C=C)C1C=C)C1C=C)C1C=C)C1C=C)C1C=C)C1C=C)C1C=C)C1C=C)C1C=C)C1C=C)C1C=C)C1C=C)C1C=C)C1C=C)C1C=C)C1C=C)C1C=C)C1C=C)C1C=C)C1C=C)C1C=C)C1C=C)C1C=C)C1C=C)C1C=C)C1C=C)C1C=C)C1C=C)C1C=C)C1C=C)C1C=C)C1C=C)C1C=C)C1C=C)C1C=C)C1C=C)C1C=C)C1C=C)C1C=C)C1C=C)C1C=C)C1C=C)C1C=C)C1C=C)C1C=C)C1C=C)C1C=C)C1C=C)C1C=C)C1C=C)C1C=C)C1C=C)C1C=C)C1C=C)C1C=C)C1C=C)C1C=C)C1C=C)C1C=C)C1C=C)C1C=C)C1C=C) |                |         |                         |

|        |         |                                                                                                                                     |                |         |                              |
|--------|---------|-------------------------------------------------------------------------------------------------------------------------------------|----------------|---------|------------------------------|
| BIOMOL | NO-102  | [C@](CCN1CC=C)([C@H]2[C@H](N1C=CC3)[C@H](O4)[C@H](CCN5CC=C)([C@]3O)[C@H]5C6)c(c4c(O)cc7)c67)CC8)[C@]8(O)[C@H]1C9)c(c9ccc%10O)c%10O2 | C38H42N4O6     | 650.763 | Naloxonazine 2HCl            |
| BIOMOL | DL-313  | c1(C(=O)O)cccc1OC(=O)C                                                                                                              | C9H8O4         | 180.157 | Acetylsalicylic acid         |
| BIOMOL | DL-390  | C(O)(C)P([O-])(=O)OP([O-])(=O)O                                                                                                     | C2H6O7P2       | 204.012 | Etidronate 2Na               |
| BIOMOL | DL-314  | c1(C(=O)O)nc(c(C)[n+])([O-])c1                                                                                                      | C6H6N2O3       | 154.123 | Acipimox                     |
| BIOMOL | DL-170  | c1(\C=C1C1C(=C1C=C1C1C(=C1C(=O)OCC)c(C)cc(OC)c(C)c1C                                                                                | C23H30O3       | 354.482 | Etretinate                   |
| BIOMOL | DL-315  | c1(Nc2c(C1)cccc2Cl)cccc1CC(=O)OCC(=O)O                                                                                              | C16H13Cl2NO4   | 354.185 | Aceclofenac                  |
| BIOMOL | DL-563  | c(cc(S(=O)(=O)N)c(C)C1)(S(=O)(=O)NC(C1Cl)Cl)N2)c12                                                                                  | C8H8Cl3N3O4S2  | 380.656 | Trichloromethiazide          |
| BIOMOL | DL-316  | c(N=C(N)NC1=O)(n(COCCO)cn2)c12                                                                                                      | C8H11N5O3      | 225.205 | Acycloguanosine              |
| BIOMOL | DL-392  | c1(nc(N)nc2)c2nen1CCC(COC(=O)C)COC(=O)C                                                                                             | C14H19N5O4     | 321.332 | Famciclovir                  |
| BIOMOL | DL-317  | [C@H]1(O[C@H](CO)[C@@H](N=[N+]=[N-])C1N2C=C(C)C(=O)NC2=O                                                                            | C10H13N5O4     | 267.241 | 3'-azido-3'-deoxythymidine   |
| BIOMOL | DL-393  | c(cc(Sc1ccccc1)cc2)(nc(NC(=O)O)C)[nH]3)c23                                                                                          | C15H13N3O2S    | 299.348 | Fenbendazole                 |
| BIOMOL | DL-318  | n1c(O)c2c(N=NC2)nc1                                                                                                                 | C5H4N4O        | 136.111 | Allopurinol                  |
| BIOMOL | DL-394  | c1(ccc(C(=O)CCC(=O)O)cc1)c2ccccc2                                                                                                   | C16H14O3       | 254.281 | Fenbufen                     |
| BIOMOL | PR-123  | C(O)(CCCN)(P([O-])(=O)OP(=O)(O)O                                                                                                    | C4H12NO7P2     | 248.088 | Alendronate                  |
| BIOMOL | DL-395  | c12c(C(c3ccc(O)cc3)CNCC1)cc(O)c(O)c2Cl                                                                                              | C16H16ClNO3    | 305.756 | Fenoldopam mesylate          |
| BIOMOL | DL-320  | c1(N(C)C)nc(N(C)C)nc(N(C)C)n1                                                                                                       | C9H18N6        | 210.279 | Altretamine                  |
| BIOMOL | DL-396  | c1(Oc2ccccc2)cccc(C(C)C(=O)O)c1                                                                                                     | C15H14O3       | 242.27  | Fenoprofen                   |
| BIOMOL | DL321   | c(ccc(SCCC)c1)([nH]c(NC(=O)O)C)n2)c12                                                                                               | C12H15N3O2S    | 265.331 | Albendazole                  |
| BIOMOL | DL-397  | c1(ccc(OC(C)(C)C(=O)O)C(C)cc1)C(=O)c2ccc(Cl)cc2                                                                                     | C20H21ClO4     | 360.831 | Fenofibrate                  |
| BIOMOL | DL-565  | C(C(=O)O)CC(=O)O . c(cc(CS(=O)(=O)NC)cc1)(c(CCN(C)C)c[nH]2)c12                                                                      | C18H27N3O6S    | 413.488 | Sumatriptan Succinate        |
| BIOMOL | DL-398  | [C@]1([H])(CC[C@H]2C(=O)NC(C)(C)C)[C@]2(C)CC[C@H]3([H])[C@                                                                          | C23H36N2O2     | 372.544 | Finasteride                  |
| BIOMOL | DL-468  | c(ccc(OC(F)F)c1)([nH]c(S(=O)Cc2nccc(OC)c2OC)n3)c13                                                                                  | C16H15F2N3O4S  | 383.37  | Pantoprazole                 |
| BIOMOL | AC-1053 | c1(ccnc2C)c2[nH]c3c1ccc(OC)c3                                                                                                       | C13H12N2O      | 212.247 | Harmine                      |
| BIOMOL | NS-710  | [C@H]1(c2ccc(F)cc2)CCN[C@H]1COc3ccc4c(OCO4)c3                                                                                       | C19H20FNO3     | 329.365 | Paroxetine HCl               |
| BIOMOL | NS-102  | c1(SCCCN(C)C)cccc1NC(=O)C=C1c2ccccc2                                                                                                | C20H24N2OS     | 340.482 | Cinanserin                   |
| BIOMOL | DL-470  | c(N1C=C(C(=O)O)C2=O)(c2cc(F)c3C4(N)CC4)c3O[C@H]1C                                                                                   | C16H15FN2O4    | 318.3   | Pazufloxacin                 |
| BIOMOL | NS-107  | c(cccc1)(N(CCN(C)C)C(=O)c(c2N3C)ccccc2)c13                                                                                          | C18H21N3O      | 295.379 | Dibenzepine HCl              |
| BIOMOL | DL-471  | C(N(C)C)c1c(c(F)c(N2CCN(C)CC2)c1)C3=O=C3C(=O)O                                                                                      | C17H20FN3O3    | 333.357 | Pefloxacin mesylate          |
| BIOMOL | NS-108  | [C@](O)(O[C@@H](C(C)C)NC(=O)[C@H]1CN(C)[C@@H]([H])([H])C1)Cc3c(c4[nH]c3)c2ccc4)C5=O)([C@@H]6([H])N(CCC6)C(=O)[C@H]7Cc8cccc8)N57     | C35H41N5O5     | 611.731 | Dihydroergocristine mesylate |
| BIOMOL | DL-472  | c(N=C(N)NC1=O)(n(CCC(CO)CO)cn2)c12                                                                                                  | C10H15N5O3     | 253.258 | Penciclovir                  |
| BIOMOL | NS-109  | C1(N2CCN(C)CC2)=Nc3c(ccc(F)c3)Cc4c1cccc4                                                                                            | C19H20FN3      | 309.381 | Fluperlapine                 |
| BIOMOL | DL-473  | c(n(C)cn1)(C(=O)N(CCCCC(=O)C)C(=O)N2C)c12                                                                                           | C13H18N4O3     | 278.307 | Pentoxifylline               |
| BIOMOL | NS-140  | C(CNC)(O)c1ccc(C(F)(F)F)cc1c2ccccc2                                                                                                 | C17H18F3NO     | 309.326 | Fluoxetine HCl               |
| BIOMOL | DL-474  | N([C@@H](C([O-]))=O)(C(C)(C)S1)(C(=O)[C@H]2NC(=O)COc3ccccc3)[C@H]12                                                                 | C16H17N2O5S    | 349.382 | Pencillin v potassium        |
| BIOMOL | NS-145  | c1(C(=O)C)(Cn2ccnc2)CC3)c3n(C)c4c1cccc4                                                                                             | C18H19N3O      | 293.363 | Ondansetron                  |
| BIOMOL | DL-475  | N1(c2ccccc2)C(=O)C(CCCC)C(=O)N1c3ccccc3                                                                                             | C19H20N2O2     | 308.374 | Phenylbutazone               |
| BIOMOL | NS-515  | c(cccc1)(NC(=O)N(CCN2CCC(C(=O)c3ccc(F)cc3)CC2)C4=O)c14                                                                              | C22H22FN3O3    | 395.427 | Ketanserin tartrate          |
| BIOMOL | DL-476  | [C@H]([C@H](NC(=O)[C@H](NC(=O)N1CCN(CC)C(=O)C1=O)c2ccccc2)C3=O)(SC(C)(C)[C@@H]4C(O)=O)N34                                           | C23H27N5O7S    | 517.555 | Piperacillin                 |
| BIOMOL | DL-562  | C(O)(C(=O)O[C@H]1C[C@@H]([H])([N+](C)(C)[C@@H]2([H])C1)[C@H]([C@H]23)O3)(c4scccc4)c5ccccc5.[Br-]                                    | C19H22BrNO4S2  | 472.416 | Tiotropium Br                |
| BIOMOL | DL-477  | [C@]12([H])(C=C[C@H](O)[C@@H]1CC[C@@H]3[C@@H]([O])CC(=O)O3)[C@@H](O)C[C@H](O)C[C@H]2O[C@@H](C)C(=O)O                                | C23H34O6       | 406.512 | Pravastatin lactone          |
| BIOMOL | NS-531  | c1(cc(S(=O)(=O)C)cc2)c2Sc3c(cccc3)N1CCC4CCCCN4C                                                                                     | C21H26N2OS2    | 386.574 | Mesoridazine besylate        |
| BIOMOL | GR-341  | S(P(=O)(O)O)CCNCCCN                                                                                                                 | C5H15N2O3PS    | 214.223 | Amifostine                   |
| BIOMOL | DL-399  | C1(=O)NC(=O)NC=C1F                                                                                                                  | C4H3FN2O2      | 130.077 | 5-fluorouracil               |
| BIOMOL | DL-324  | C1(CC)(CCC(=O)NC1=O)c2ccc(N)cc2                                                                                                     | C13H16N2O2     | 232.278 | DL-aminoglutethimide         |
| BIOMOL | DL-400  | c1(ccc(C(C)C(=O)O)cc1F)c2ccccc2                                                                                                     | C15H13FO2      | 244.261 | Flurbiprofen                 |
| BIOMOL | DL-325  | c1(C(=O)O)cccc(N)cc1O                                                                                                               | C7H7NO3        | 153.135 | 4-aminosalicylic acid        |
| BIOMOL | DL-401  | c(c(F)c(N1CCN(C)CC1)c(F)c2)(N(CCF)C=C(C(=O)O)C3=O)c23                                                                               | C17H18F3N3O3   | 369.338 | Fleroxacin                   |
| BIOMOL | DL-326  | c1(C(=O)O)cc(N)ccc1O                                                                                                                | C7H7NO3        | 153.135 | 5-aminosalicylic acid        |
| BIOMOL | DL-402  | c1(ccc([C@@H](O)[C@H](CF)NC(=O)C)Cl)cc1S(C(=O)=O                                                                                    | C12H14Cl2FNO4S | 358.213 | Florfenicol                  |

|        |        |                                                                                                                                                                                           |               |         |                        |
|--------|--------|-------------------------------------------------------------------------------------------------------------------------------------------------------------------------------------------|---------------|---------|------------------------|
| BIOMOL | DL-327 | <chem>N[C@@H](C(=O)O)C(C)(C)S1(C=O)[C@H]2NC(=O)[C@H](N)c3ccccc3</chem>                                                                                                                    | C16H19N3O4S   | 349.405 | Ampicillin trihydrate  |
| BIOMOL | DL-403 | <chem>[C@H]1(C[C@H](O)[C@@H](CO)O1)N2C=C(F)C(=O)NC2=O</chem>                                                                                                                              | C9H11FN2O5    | 246.192 | Floxuridine            |
| BIOMOL | DL-328 | <chem>C1(O C(C)O C(=O)O CC)=C(C(=O)Nc2ncccc2)N(C)S(=O)(=O)c3c1cccc3</chem>                                                                                                                | C20H21N3O7S   | 447.462 | Ampiroxicam            |
| BIOMOL | DL-404 | <chem>[C@]1(C(=O)CO)(O C(C)(C)O2)[C@H]2C[C@]3([H])[C@]1(C)C[C@H](O)[C@@]4(F)[C@@]3([H])C[C@H](F)C(=C5)[C@]4(C)C=CC5=O</chem>                                                              | C24H30F2O6    | 452.488 | Fluocinolone acetone   |
| BIOMOL | DL-329 | <chem>[C@H]([H])(C[C@H](N)[C@H](O)[C@H]1[C@@H](N)C[C@H](N)[C@H](O)[C@H]1O)O2)O[C@H](O[C@H]3[C@H](O)[C@H](O)[C@H](N)[C@H](CO)O3)[C@H](NC)[C@H]4O)[C@]24[H]</chem>                          | C21H41N5O11   | 539.577 | Apramycin              |
| BIOMOL | DL-405 | <chem>c(cc(C(=O)c1ccc(F)cc1)cc2)(nc(NC(=O)OC)[nH]3)c23</chem>                                                                                                                             | C16H12FN3O3   | 313.283 | Flubendazole           |
| BIOMOL | NP-016 | <chem>[C@H]1([C@]1([H])CC[C@H]2C([C@@]2([H])CC3)O[C@]3(C)O4)[C@]4([H])O C(=O)[C@H]1C</chem>                                                                                               | C15H22O5      | 282.332 | Artemisinin            |
| BIOMOL | DL-406 | <chem>c1(C(F)(F)F)cc(NC(=O)C(C)C)ccc1[N+](=[O-])=O</chem>                                                                                                                                 | C11H11F3N2O3  | 276.212 | Flutamide              |
| BIOMOL | AC-166 | <chem>c1(OCC(O)CNC(C)C)ccc(C(C(=O)N)cc1</chem>                                                                                                                                            | C14H22N2O3    | 266.336 | Atenolol               |
| BIOMOL | DL-407 | <chem>c1(ccc(F)cc1F)C(O)(Cn2nccn2)Cn3nccn3</chem>                                                                                                                                         | C13H12F2N6O   | 306.271 | Fluconazole            |
| BIOMOL | DL-332 | <chem>c1(cc(OC)c(O)C)c2CC[N+](C)(CCC(=O)O)CCCCCO C(=O)CC[N+](3(C)CC4c(cc(O)C)c(O)C)c4)C3Cc5ccc(O)C)c(O)c5)C1Cc6ccc(O)C)c(O)c6</chem>                                                      | C53H72N2O12   | 929.145 | Atracurium besylate    |
| BIOMOL | DL-408 | <chem>[C@]([H])([C@]1(C)C=C(O)C(=O)CC1)CC2(C)[C@]3(C)[C@]4([H])CCC3=O)[C@@]24[H]</chem>                                                                                                   | C19H26O3      | 302.408 | Formestane             |
| BIOMOL | DL-478 | <chem>c(cc(C(C)C(=O)O)cc1)(Cc(c2O3)cccn2)c13</chem>                                                                                                                                       | C15H13NO3     | 255.269 | Pranoprofen            |
| BIOMOL | NS-835 | <chem>N1(CCC2CCCCN2C)c3c(cccc3)Sc4c1cc(SC)cc4</chem>                                                                                                                                      | C21H26N2S2    | 370.575 | Thioridazine HCl       |
| BIOMOL | DL-479 | <chem>[C@@]1([C@]2(C)C[C@H](O)[C@]3([H])[C@]1(CCC(=C4)[C@]3(C)C=CC4=O)[H])(CC[C@]2(C)CO)=O)[H]</chem>                                                                                     | C21H28O5      | 360.444 | Prednisolone           |
| BIOMOL | PD-125 | <chem>c(C=CC(=O)N1)(cc(OCCCC(=O)N(C)C2CCCCC2)cc3)c13</chem>                                                                                                                               | C20H26N2O3    | 342.432 | Cilostamide            |
| BIOMOL | DL-480 | <chem>[C@]([H])([C@]1(C)C=CC(=O)CC1)CC2(C)[C@]3(C)[C@]4([H])CC[C@@H]3C(=O)C)[C@@]24[H]</chem>                                                                                             | C21H30O2      | 314.462 | Progesterone           |
| BIOMOL | PD-130 | <chem>c1(cnn2CC)c2ncc(C(=O)OCC)c1Nn=C(C)/C)C</chem>                                                                                                                                       | C14H19N5O2    | 289.333 | Etazolate              |
| BIOMOL | DL-481 | <chem>c1(ccc(CNNC)cc1)C(=O)NC(C)C</chem>                                                                                                                                                  | C12H19N3O     | 221.299 | Procarbazine HCl       |
| BIOMOL | PD-140 | <chem>c1(nc[nH]2)c2C(=O)N(C)C(=O)N1CC(C)C</chem>                                                                                                                                          | C10H14N4O2    | 222.244 | Isobutylmethylxanthine |
| BIOMOL | DL-482 | <chem>c1(CCC)nc(C(=S)N)c1</chem>                                                                                                                                                          | C9H12N2S      | 180.27  | Prothionamide          |
| BIOMOL | PD-141 | <chem>c1(nc(N)nc(N)n1)c2cc(Cl)ccc2Cl</chem>                                                                                                                                               | C9H7Cl2N5     | 256.091 | Irsogladine maleate    |
| BIOMOL | DL-483 | <chem>[C@@]1([C@]2(C)CC(=O)[C@]3([H])[C@]1(CCC(=C4)[C@]3(C)C=CC4=O)[H])(CC[C@]2(C)CO)=O)[H]</chem>                                                                                        | C21H26O5      | 358.428 | Prednisone             |
| BIOMOL | PD-152 | <chem>C1(=C(C)NC(=O)C(C#N)=C1)c2ccncc2</chem>                                                                                                                                             | C12H9N3O      | 211.219 | Milrinone              |
| BIOMOL | DL-484 | <chem>[C@]([H])([C@]1(C)C[C@H](O)CC1)=CC2(C)[CC[C@@]3(C)[C@@]4([H])CC[C@H]3C(C)=O)[C@@]24[H]</chem>                                                                                       | C21H32O2      | 316.478 | Pregnenolone           |
| BIOMOL | PD-175 | <chem>c1(OC2CCCC2)cc(C3CC(=O)NC3)ccc1OC</chem>                                                                                                                                            | C16H21NO3     | 275.343 | Rolipram               |
| BIOMOL | DL-485 | <chem>c1(NC(C)CCCN)cc(OC)cc2c1nccc2</chem>                                                                                                                                                | C15H21N3O     | 259.347 | Primaquine phosphate   |
| BIOMOL | PD-179 | <chem>c1(ccc(\N=C(/NC)\NC#N)cc1)C2=NNC(=O)CC2C</chem>                                                                                                                                     | C14H16N6O     | 284.316 | Siguzodan              |
| BIOMOL | DL-486 | <chem>C1(CN(C(=O)C2CCCCC2)CC3=O)N3CCc4c1cccc4</chem>                                                                                                                                      | C19H24N2O2    | 312.406 | Praziquantel           |
| BIOMOL | PD180  | <chem>C1(=C(C)N=C(N)c2c(C)cc(C)cc2C)N(C)C3=O)N3CCc4c1cc(OC)c(O)c4</chem>                                                                                                                  | C24H27N3O3    | 405.489 | Trequinsin             |
| BIOMOL | DL-487 | <chem>c1(c(O)c(C(=O)O)cc(cc2)c1cc2)Cc3c(O)c(C(=O)O)cc4c3cccc4.C5(=NCCC N5C)C=Cc6scoc6</chem>                                                                                              | C34H30N2O6S   | 594.677 | Pyrantel pamoate       |
| BIOMOL | PD-185 | <chem>[C@@]([H])([C@@]1(CC)CCC2(N2CC3)c(c3c(c45)cccc4)n5C(C(=O)OCC)=C1</chem>                                                                                                             | C22H26N2O2    | 350.454 | Vinpocetine            |
| BIOMOL | DL-333 | <chem>N1(CCN(CCCC(=O)c2ccc(F)cc2)CC1)c3ncccc3</chem>                                                                                                                                      | C19H22FN3O    | 327.396 | Azaperone              |
| BIOMOL | DL-409 | <chem>N1(C=C(F)C(=O)NC1=O)C2OCCC2</chem>                                                                                                                                                  | C8H9FN2O3     | 200.167 | Ftorafur               |
| BIOMOL | T-116  | <chem>C1[C@@]([H])([C]C[C@](CC)(O)C2)CN2CCc(c(c3[nH]4)cccc3)c4[C@@]1(C)OC(=O)c5cc6c(N(C)[C@@]([C@@]67[C@](N8CC7)([H])[C@@]9(CC)C=C8)([H])[C@@](O)(C(OC)=O)[C@@H]9OC(C)=O)cc5OC</chem>     | C46H58N4O9    | 810.974 | Vinblastine sulfate    |
| BIOMOL | DL-410 | <chem>c1(C(=O)O)cc(S(=O)(=O)N)c(C)cc1NCc2cccc2</chem>                                                                                                                                     | C12H11ClN2O5S | 330.744 | Furosemide             |
| BIOMOL | DL-335 | <chem>[C@H]1O[C@@H]2O[C@H](C)[C@H](N(C)C)[C@H]2O)[C@@](O)(C)C[C@@H](C)CN(C)[C@H](C)[C@H](O)[C@@](O)(C)[C@H](CC)OC(=O)[C@H](C)[C@H](O)[C@H]3O[C@H](C)[C@H](O)[C@](C)(OC)C3)[C@@H]1C</chem> | C38H72N2O12   | 748.984 | Azithromycin           |
| BIOMOL | DL-411 | <chem>c(N=C(N)NC1=O)(n(COC(CO)CO)cn2)c12</chem>                                                                                                                                           | C9H13N5O4     | 255.231 | Ganciclovir            |
| BIOMOL | DL-336 | <chem>[C@@H]1(NC(=O)C(=N/O C(C)(C)C(=O)O))c2nc(N)sc2C(=O)N(S(=O)(=O)O)[C@H]1C</chem>                                                                                                      | C13H17N5O8S2  | 435.433 | Aztreonam              |
| BIOMOL | DL-412 | <chem>c1(c(OC)c(N2CCNC(C)C2)c(F)c3c3C(=O)C(C(=O)O)=CN1C4CC4</chem>                                                                                                                        | C19H22FN3O4   | 375.394 | Gatifloxacin           |
| BIOMOL | DL-337 | <chem>[C@@]1(OC(=O)CC(C(=O)CO C(=O)CC)[C@@H](C)C[C@]2([H])[C@]1(C)C[C@H](O)C3(F)[C@@]2([H])CCC(=C4)[C@]3(C)C=CC4=O</chem>                                                                 | C28H37FO7     | 504.588 | Betamethasone          |

|        |             |                                                                                                                    |               |         |                           |
|--------|-------------|--------------------------------------------------------------------------------------------------------------------|---------------|---------|---------------------------|
| BIOMOL | DL-413      | [C@H]1(O[C@H]2O[C@@](O)(C)[C@H](NC)[C@H]2O)[C@H](N)C[C@H](N)[C@H](O)[C@H]3[C@H](N)CC[C@@H]([C@@H](C)NC)O3)[C@@H]1O | C21H43N5O7    | 477.595 | Gentamycin sulfate        |
| BIOMOL | DL-338      | C(c1ccccc1)(n2cnc2)c3ccc(c4ccccc4)cc3                                                                              | C22H18N2      | 310.392 | Bifonazole                |
| BIOMOL | DL-414      | c1(OCCCC(C)(C)C(=O)O)cc(C)ccc1C                                                                                    | C15H22O3      | 250.333 | Gemfibrozil               |
| BIOMOL | DL-339      | C(c1ccccc1)(c2ccc(O C(=O)O)cc2)c3ccc(O C(=O)O)cc3                                                                  | C22H19NO4     | 361.391 | Bisacodyl                 |
| BIOMOL | DL-415      | C(CCC1)(CN(NC(=O)NS(=O)(=O)c2ccc(C)cc2)C3)C13                                                                      | C15H21N3O3S   | 323.411 | Gliclazide                |
| BIOMOL | DL-340      | c1(CN(C)C2CCCC2)cc(Br)cc(Br)c1N<br>N1(C(=O)NCCc2ccc(S(=O)(=O)NC(=O)N[C@@H]3CC[C@H](C)CC3)cc2)CC(C)=C(C)C1=O        | C14H20Br2N2   | 376.13  | Bromhexine HCl            |
| BIOMOL | DL-416      | C12(CCCC1)CC(=O)N(CCCCN3CCN(c4nccn4)CC3)C(=O)C2                                                                    | C24H34N4O5S   | 490.616 | Glimepiride               |
| BIOMOL | DL-341      | c1(OCC(O)CO)ccccc1OC                                                                                               | C10H14O4      | 198.216 | Guaifenesin               |
| BIOMOL | DL-342      | [C@@]12(CCC(=O)O)1CC[C@]3([H])[C@]2(C)CC[C@]4([H])[C@@]3([H])C=CC(=C5)[C@]4(C)CCC5=O                               | C22H28O3      | 340.456 | Canrenone                 |
| BIOMOL | DL-418      | [C@@H](CC)(c1ccc(O)cc1)[C@@H](CC)c2ccc(O)cc2                                                                       | C18H22O2      | 270.366 | Hexestrol                 |
| BIOMOL | DL-488      | c1(NC(C)CCCN(C)CC)c2c(cc(Cl)cc2)nc3c1cc(OC)cc3                                                                     | C23H30ClN3O   | 399.957 | Quinacrine 2HCl dihydrate |
| BIOMOL | PD-190      | c1(ccccc1OCCC)C2=NC(=O)c3c(n[nH]3)N2<br>N1(C(=O)[C@H](C)N[C@H](C(=O)OCC)CCc2ccccc2)Cc(c3C[C@H]1C(=O)O)ccccc3       | C13H13N5O2    | 271.275 | Zaprinast                 |
| BIOMOL | DL-489      | c1(ccc(OC(F)F)c(OC)c1)C2=NNC(=O)C=C2                                                                               | C25H30N2O5    | 438.516 | Quinapril HCl             |
| BIOMOL | PD-195      | C(CSC(=O)C)(C(=O)NCC(=O)O)Cc1ccccc1Cc2ccccc2                                                                       | C12H10F2N2O3  | 268.216 | Zardaverine               |
| BIOMOL | DL-159      | [C@@]1([H])(CCCCCCC(=O)O)C(=O)C[C@H](O)[C@]1([H])C=C[C@@H](O)CCCCC                                                 | C21H23NO4S    | 385.477 | Racecadotril              |
| BIOMOL | PG-006 PGE1 | c1(OCC(O)CN2CCN(CC(=O)Nc3c(C)cccc3C)CC2)ccccc1OC                                                                   | C20H34O5      | 354.481 | Alprostadil               |
| BIOMOL | DL-490      | [C@H]1(C=C(Cl)C(O)(C)CCC)[C@H](O)CC(=O)[C@@H]1CCCCCCC(=O)OC                                                        | C24H33N3O4    | 427.537 | Ranolazine 2HCl           |
| BIOMOL | PG-051      | N1(C(=O)[C@H](C)N[C@H](C(=O)OCC)CCc2ccccc2)[C@H](C(=O)O)C[C@@]3([H])[C@]1([H])CCC3                                 | C22H38O5      | 382.534 | Misoprostol               |
| BIOMOL | DL-491      | c1(NCC(C)C2)c2ccc1S(=O)(=O)N[C@@H](CCCCN(=N)N)C(=O)N3CC[C@@H](C)C[C@H]3C(=O)O                                      | C23H32N2O5    | 416.511 | Ramipril                  |
| BIOMOL | PI-146      | c1(cccc2)c2NC(=O)C=C1CC(C(=O)O)NC(=O)c3ccc(Cl)cc3                                                                  | C23H36N6O5S   | 508.634 | Argatroban                |
| BIOMOL | DL-147      | [C@@H]1(C(=O)N(C)C(=O)O)=C/CCCCSC[C@H](N)C(=O)O)CC1(C)C                                                            | C19H15ClN2O4  | 370.786 | Rebamipide                |
| BIOMOL | PI-153      | [C@@H]1([C@H](O)[C@H](O)[C@@H](CO)O1)n2cnc(C(=O)N)n2                                                               | C16H26N2O5S   | 358.453 | Cilastatin                |
| BIOMOL | DL-492      | [C@@]([C@]1([H])[C@@]([H])(C)[C@@]([H])(OC(=O)CCC(O)=O)O2)([C@]3([H])[C@]([H])(C)CC1)(O4)[C@]2(O)[C@@]4(C)CC3)[H]  | C8H12N4O5     | 244.205 | Ribavirin                 |
| BIOMOL | PR-117      | [C@@H](N[C@@H]1[C@H]2CCCC1)C[C@H](O)[C@H](CSc3ccccc3)NC(=O)c4cccc(O)c4C(C(=O)NC(C)(C)C)C2.S(=O)(=O)O)C             | C19H28O8      | 384.421 | Artesunate                |
| BIOMOL | DL-566      | c1(C(=O)NCCc2cnc2)cc(C(=O)NCCc3cnc2)ccc1OC                                                                         | C33H49N3O7S2  | 663.888 | Nelfinavir Mesylate       |
| BIOMOL | RA-104      | [C@@]1([C@@]([H])(C)[C@@]2([H])C1)C[C@@]3([H])C2(C3)C(N)C                                                          | C21H20N4O3    | 376.409 | Picotamide                |
| BIOMOL | DL-494      | [C@@H](O1)[C@H](O)[C@@H](O)[C@H](O)[C@H]2O)[C@@H]12                                                                | C12H21N       | 179.302 | Rimantadine HCl           |
| BIOMOL | S104        | c1(cccc2)c2ccc1OCC(O)CNC(C)C                                                                                       | C6H10O5       | 162.141 | Conduritol b epoxide      |
| BIOMOL | ST-405      | C(=C1C(=CC(=O)CC1)CC2)([C@@H](c3ccc(N(C)C)cc3)C[C@@]4(C)[C@@]5([H])CC[C@@]4(O)C#CC)[C@@]25[H]                      | C16H21NO2     | 259.343 | Propranolol               |
| BIOMOL | S-510       | c(ccccc1)[n+][O-]c(\C=MNC(=O)OC)[n+][2O-]c12                                                                       | C29H35NO2     | 429.594 | Mifepristone              |
| BIOMOL | DL-343      | [C@@]1([C@]2(C)C[C@H](O)[C@]([C@@]13[H])([H])[C@]4(C)C(=CC(=O)CC4)CC3)(CC[C@@]2(C)CO(=O)O)[H]                      | C11H10N4O4    | 262.222 | Carbadox                  |
| BIOMOL | DL-419      | C12(CCC1)C(=O)O[Pt]OC2=O                                                                                           | C21H30O5      | 362.46  | Hydrocortisone            |
| BIOMOL | DL-344      | [C@](C)([C@](C(=O)CO C(=O)C)(O)CC1)(C[C@H](O)[C@@]2([H])[C@]3(CCC(=C4)[C@]2(C)CCC4=O)[H])[C@@]13[H]                | C6H6O4Pt      | 337.187 | Carboplatin               |
| BIOMOL | DL-420      | N1(C(=O)N)c2c(cccc2)C=Cc3c1ccccc3                                                                                  | C23H32O6      | 404.497 | Hydrocortisone 21-acetate |
| BIOMOL | DL-345      | [C@]1([H])(CCC(=C2)[C@]3(C)CCC2=O)[C@]3([H])CC[C@@]4(C)[C@@]1([H])CC[C@]4(O)C(=O)C                                 | C15H12N2O     | 236.269 | Carbamazepine             |
| BIOMOL | DL-421      | C1([C@@H](NC([C@H](NC(=O)N2CCN(CC)C(=O)C2=O)c3ccc(O)cc3)=O)[C@]4([H])N1C(C(=O)O)=C(CSc5nnnn5)CS4)=O                | C21H30O3      | 330.461 | 17- hydroxyprogesterone   |
| BIOMOL | DL-346      | [C@@H]1(C[C@H](O)[C@@H](CO)O1)N2C=C(I)C(=O)NC2=O                                                                   | C25H27N9O8S2  | 645.667 | Cefoperazone acid         |
| BIOMOL | DL-422      | N1([C@]2([H])SCC(COC(=O)C)=C1C(=O)O)C(=O)[C@H]2NC(=O)C(=N/O)C)c3ccc(N)n3                                           | C9H11N2O5     | 354.099 | Idoxuridine               |
| BIOMOL | DL-347      | N1(CCC)CCCO P1(=O)NCCCl                                                                                            | C16H17N5O7S2  | 455.465 | Cefotaxime acid           |
| BIOMOL | DL-423      | N(C(C([O-])=O)=C(C[n+])1ccccc1)CS2)(C(=O)[C@H]3NC(=O)C(=N/O)C(C)C(=O)O)c4nc(N)sc4)[C@H]23                          | C7H15Cl2N2O2P | 261.086 | Ifosfamide                |
| BIOMOL | DL-348      | c1(n(CC(C)C)n2)c2c(N)nc3c1ccccc3                                                                                   | C22H22N6O7S2  | 546.576 | Ceftazidime               |
| BIOMOL | DL-424      |                                                                                                                    | C14H16N4      | 240.304 | Imiquimod                 |

|        |        |                                                                                                                                                                                                                       |               |         |                                       |
|--------|--------|-----------------------------------------------------------------------------------------------------------------------------------------------------------------------------------------------------------------------|---------------|---------|---------------------------------------|
| BIOMOL | DL-349 | <chem>c1(ccc([N+](O-)=O)cc1)[C@@H](O)[C@@H](CO)NC(=O)C(Cl)Cl</chem>                                                                                                                                                   | C11H12Cl2N2O5 | 323.129 | Chloramphenicol                       |
| BIOMOL | DL-425 | <chem>c1(cccc2)c2CC(C)N1NC(=O)c3ccc(Cl)c(S(=O)(=O)N)c3</chem><br><chem>[C@]([C@@]([C@]12[H](C)CC[C@]2[H])([H])[C@@]1([H])C=C(C)C(=C4)[C@]3(C)CCC4O(C(=O)C)(C(=O)C)(O(C(=O)C)CC2</chem>                                | C16H16ClN3O3S | 365.835 | Indapamide                            |
| BIOMOL | DL-350 | <chem>c1(C(=O)NCc2ccc(OCCN(C)C)cc2)ccc(OC)c(C)C1</chem>                                                                                                                                                               | C25H33ClO5    | 448.98  | Chlormadinone acetate                 |
| BIOMOL | DL-426 | <chem>c1(ccc(CCC(C(=O)O)cc1)N(CCC)CCC</chem>                                                                                                                                                                          | C20H26N2O4    | 358.431 | Itopride HCl                          |
| BIOMOL | DL-351 | <chem>C1(Cn2ncnc2)(OCC(COc3ccc(N4CCN(c5ccc(N6C=NN(C(C)CC)C6=O)cc5)C4)cc3)O1)c7ccc(Cl)cc7Cl</chem>                                                                                                                     | C14H19Cl2NO2  | 304.212 | Chlorambucil                          |
| BIOMOL | DL-427 | <chem>C(CCN(C)C)(c1cccc1)c2ccc(Cl)cc2</chem>                                                                                                                                                                          | C35H38Cl2N8O4 | 705.633 | Itraconazole                          |
| BIOMOL | DL-352 | <chem>c1(C(=O)c2ccccc2)cccc([C@H](C)C(=O)O)c1</chem>                                                                                                                                                                  | C16H19ClN2    | 274.788 | Chlorpheniramine maleate              |
| BIOMOL | EI-288 | <chem>c1(CN2CCCC2)cccc(OCCNC(=O)COC(=O)C)c1</chem>                                                                                                                                                                    | C16H14O3      | 254.281 | Ketoprofen (s)                        |
| BIOMOL | DL-496 | <chem>[C@]1(C(=O)C)(OC(=O)C)CC[C@]2([H])[C@]1(C)CC[C@]23([H])[C@@]2([H])C=C(C)C(=C4)[C@]3(C)CCC4=O</chem>                                                                                                             | C19H28N2O4    | 348.437 | Roxatidine acetate HCl                |
| BIOMOL | S-515  | <chem>[C@@H]1(O)[C@@H]2O[C@@H](C)[C@H](O)[C@](C)(OC)C2[C@@H](C)C(=O)O[C@H](CC)[C@](O)(C)[C@H](O)[C@@H](C)C(=N)OCCCCO</chem><br><chem>)([C@H](C)C[C@](O)(C)[C@H](O)[C@@H]3O[C@H](C)C[C@H](N(C)C)[C@H]3O)[C@H]1C</chem> | C24H32O4      | 384.508 | Megestrol acetate                     |
| BIOMOL | DL-497 | <chem>[C@]1(C(=O)C)(OC(=O)C)C(=C)C[C@]2([H])[C@]1(C)CC[C@]23([H])[C@@]2([H])C=C(C)C(=C4)[C@]3(C)CCC4=O</chem>                                                                                                         | C41H76N2O15   | 837.047 | Roxithromycin                         |
| BIOMOL | S-520  | <chem>c(N1C=C(C(=O)O)C2=O)(c2cc(F)c3N4CCN(C)CC4)c3SCC1</chem>                                                                                                                                                         | C25H32O4      | 396.519 | Melengestrol acetate                  |
| BIOMOL | DL-498 | <chem>C/(c1ccccc1)(c2ccc(OCCN(C)C)cc2)=C/(CC)c3ccccc3</chem>                                                                                                                                                          | C17H18FN3O3S  | 363.407 | Rufloxacin                            |
| BIOMOL | S-650  | <chem>c1(cc(N2CCNCC2)c(F)c3c3C(=O)C(C(=O)O)=CN1c4ccc(F)cc4</chem>                                                                                                                                                     | C26H29NO      | 371.515 | Tamoxifen citrate                     |
| BIOMOL | DL-499 | <chem>N(CCC(C)C)(C[C@H](O)[C@H](N(C(=O)O)[C@H]1COCC1)Cc2ccccc2</chem><br><chem>)S(=O)(=O)c3ccc(N)cc3</chem>                                                                                                           | C20H17F2N3O3  | 385.364 | Sarafloxacin HCl                      |
| BIOMOL | DL-532 | <chem>[C@@]([H])(O1)[C@]([H])([N+])([C@@]23[H])(C)CCCC)C[C@@H](OC(=O)[C@H](CO)c4ccccc4)C2)[C@@]13[H]</chem>                                                                                                           | C25H35N3O6S   | 505.627 | Amprenavir                            |
| BIOMOL | DL-500 | <chem>C1(CN2CCO[C@H](O)[C@H](C)c3cc(C(F)(F)F)cc(C(F)(F)F)c3)[C@@H]2c4ccc(F)cc4)=NC(=O)NN1</chem>                                                                                                                      | C21H30NO4     | 360.467 | Scopolamine n-butylbromide            |
| BIOMOL | DL-533 | <chem>[C@@]([H])(O1)[C@]([H])(N([C@@]23[H])(C)C[C@H](OC(=O)[C@H](CO)c4ccccc4)C2)[C@@]13[H]</chem>                                                                                                                     | C23H21F7N4O3  | 534.427 | Aprepitant                            |
| BIOMOL | DL-501 | <chem>c1(Oc2ccccc2OC)c(OCCO)nc(c3ncccn3)nc1NS(=O)(=O)c4ccc(C(C)(C)C)c4</chem>                                                                                                                                         | C17H21NO4     | 303.353 | Scopolamine HBr                       |
| BIOMOL | DL-534 | <chem>n1(CC(O)C)c(C)nc1[N+](O-)=O</chem>                                                                                                                                                                              | C27H29N5O6S   | 551.614 | Bosentan                              |
| BIOMOL | DL-502 | <chem>[C@@]1(C#CC2CC2)(c3c(ccc(Cl)c3)NC(=O)O1)C(F)(F)F</chem>                                                                                                                                                         | C7H11N3O3     | 185.181 | Secnidazole                           |
| BIOMOL | DL-535 | <chem>C1(CCC1)(C(N(C)C)CC(C)C)c2ccc(Cl)cc2</chem>                                                                                                                                                                     | C14H9ClF3NO2  | 315.675 | Efavirenz                             |
| BIOMOL | DL-503 | <chem>[C@]1([H])([C@H](O)C[C@]2([H])[C@]3(C)CC[C@H](O)C2)[C@]3([H])C[C@H](O)[C@@]4(C)[C@@]1([H])CC[C@H]4[C@H](C)CCC(=O)NC</chem><br><chem>CS(=O)(=O)O</chem>                                                          | C17H26ClN     | 279.848 | Sibutramine HCl                       |
| BIOMOL | DL-536 | <chem>c(c(F)c(N1C[C@H](C)N[C@H](C)C1)c(F)c2N(N(C3CC3)C=C(C(=O)O)C4=O)c24</chem>                                                                                                                                       | C26H45NO7S    | 515.703 | Taurocholic acid, sodium salt hydrate |
| BIOMOL | DL-149 | <chem>N1(CCCC)C[C@H](O)[C@@H](O)[C@H](O)[C@H]1CO</chem>                                                                                                                                                               | C19H22F2N4O3  | 392.4   | Sparfloxacin                          |
| BIOMOL | SL-230 | <chem>[C@@]12(CCC(=O)O1)CC[C@]3([H])[C@]2(C)CC[C@]4([H])[C@@]3([H])[C@H](S(C(=O)C)CC(=C5)[C@]4(C)CCC5=O</chem>                                                                                                        | C10H21NO4     | 219.278 | Miglustat                             |
| BIOMOL | DL-504 | <chem>[C@@]([H])([C@@]1([H])[C@]([C@H](O)CC1)CC2)([C@H](CCCCCCCCS(=O)O)CCCC(F)(F)C(F)(F)Cc3c4ccc(O)c3)[C@]24[H]</chem>                                                                                                | C24H32O4S     | 416.573 | Spironolactone                        |
| BIOMOL | DL-104 | <chem>c(ccc(Cl)c1)(c(NC(C)CCN(CC)CC)ccn2)c12</chem>                                                                                                                                                                   | C32H47F5O3S   | 606.771 | Fulvestrant                           |
| BIOMOL | DL-353 | <chem>[C@H]1(N=C(N2C1)SCC2)c3ccccc3</chem>                                                                                                                                                                            | C18H26ClN3    | 319.872 | Chloroquine phosphate                 |
| BIOMOL | DL-429 | <chem>N1(C(=O)C)c(c2C1=O)cccc2)C3CCC(=O)N3C=O</chem>                                                                                                                                                                  | C11H12N2S     | 204.291 | Levamisole HCl                        |
| BIOMOL | T-115  | <chem>[C@](CC)([C@](O)(C#C)CC1)(CC[C@]2([H])[C@@]3([H])CCC(=C4)[C@@]2([H])CCC4=O)[C@@]13[H]</chem>                                                                                                                    | C13H10N2O4    | 258.229 | Thalidomide                           |
| BIOMOL | DL-430 | <chem>c1(cc(N2CCNCC2)c(F)c3c3C(=O)C(C(=O)O)=CN1C4CC4</chem>                                                                                                                                                           | C21H28O2      | 312.446 | Levonorgestrel                        |
| BIOMOL | DL-355 | <chem>c1(O)cc(C[C@H](N)C(=O)O)ccc1O</chem>                                                                                                                                                                            | C17H18FN3O3   | 331.342 | Ciprofloxacin                         |
| BIOMOL | DL-431 | <chem>C1(CCCN(C)C)(c2ccc(F)cc2)OCc3c1ccc(C#N)c3</chem>                                                                                                                                                                | C9H11NO4      | 197.188 | Levodopa                              |
| BIOMOL | AR-116 | <chem>c(N1C=C(C(=O)O)C2=O)(c2cc(F)c3N4CCN(C)CC4)c3OC[C@H]1C</chem>                                                                                                                                                    | C20H21FN2O    | 324.392 | Citalopram                            |
| BIOMOL | DL-432 | <chem>[C@@H]1(O)[C@@H]2O[C@H](C)C[C@H](N(C)C)[C@H]2O)[C@@H](C)[C@H](O)[C@@H]3O[C@@H](C)[C@H](O)[C@](C)(OC)C3[C@@H](C)C(=O)O[C@H](CC)[C@](O)(C)[C@H](O)[C@@H](C)C(=O)[C@H](C)C[C@@]1(C)OC</chem>                       | C18H20FN3O4   | 361.368 | Levofloxacin HCl                      |
| BIOMOL | DL-357 | <chem>c1(cnoc1C)C(=O)Nc2ccc(C(F)(F)F)cc2</chem>                                                                                                                                                                       | C38H69NO13    | 747.953 | Clarithromycin                        |
| BIOMOL | DL-433 | <chem>C(C(=O)C(C)C)(Oc1ccc(Cl)cc1)n2ncnc2</chem>                                                                                                                                                                      | C12H9F3N2O2   | 270.207 | Leflunomide                           |
| BIOMOL | DL-358 | <chem>N1(C(=O)[C@H](CCCC)N[C@H](C(=O)O)CCc2ccccc2)CCC[C@H]1C(=O)O</chem>                                                                                                                                              | C15H17ClN2O2  | 292.761 | Climbazole                            |
| BIOMOL | DL-434 |                                                                                                                                                                                                                       | C21H31N3O5    | 405.488 | Lisinopril                            |

|         |                 |                                                                                                                                                                                               |               |         |                                                                               |
|---------|-----------------|-----------------------------------------------------------------------------------------------------------------------------------------------------------------------------------------------|---------------|---------|-------------------------------------------------------------------------------|
| BIOMOL  | DL-359          | c1(c(Cl)c(N2CCC(N)C2)c(F)c3)c3C(=O)C(C(=O)O)=CN1C4CC4                                                                                                                                         | C17H17ClFN3O3 | 365.787 | Clinafloxacin HCl                                                             |
| BIOMOL  | DL-435          | c(c(F)c(N1CCNC(C)C1)c(F)c2)(N(CC)C=C(C(=O)O)C3=O)c23                                                                                                                                          | C17H19F2N3O3  | 351.348 | Lomefloxacin HCl                                                              |
| BIOMOL  | DL-360          | C(=C(/C/))c1cccc1)/(c2cccc2)/c3ccc(OCCN(CC)CC)cc3                                                                                                                                             | C26H28ClNO    | 405.96  | Clomiphene citrate                                                            |
| BIOMOL  | DL-436          | C(=C(\CCN(C(=O)O)CC)C1)/C1)/(c2c(cccn2)CC3)/c(ccc(Cl)c4)c34                                                                                                                                   | C22H23ClN2O2  | 382.883 | Loratadine                                                                    |
| BIOMOL  | DL-361          | c1(O)c(Cl)c(C)nc(C)c1Cl                                                                                                                                                                       | C7H7Cl2NO     | 192.043 | Clopidol                                                                      |
| BIOMOL  | DL-437          | C(CCC(=O)O)(N(C(=O)c1ccc(Cl)c(Cl)c1)C(=O)N(CCCCC)CCCC                                                                                                                                         | C22H32Cl2N2O4 | 459.406 | Lorglumide                                                                    |
| BIOMOL  | AC-1290         | N1(CCc2c(ccs2)C1)[C@H](C(=O)O)C3cccc3Cl                                                                                                                                                       | C16H16ClNO2S  | 321.822 | Clopidogrel sulfate                                                           |
| BIOMOL  | DL-438          | c1(c2nnnn2[K])cccc1c3ccc(Cn4c(CO)c(Cl)nc4CCCC)cc3                                                                                                                                             | C22H22ClKN6O  | 461.001 | Losartan potassium                                                            |
| BIOMOL  | DL-505          | [C@]([H])([C@]1(C)[C@]([H])(Cc2C1)[nH]nc2)CC3)(CC[C@]4(C)[C@<br>@]5([H])CC[C@]4(O)C)[C@]35[H]                                                                                                 | C21H32N2O     | 328.492 | Stanozolol                                                                    |
| BIOMOL  | DL-538          | c(c1n(C)c2)(c2[C@]3([H])C4=C[C@]@H(C(=O)N[C@H](CO)CC)CN3C)c4<br>ccc1                                                                                                                          | C21H27N3O2    | 353.458 | Methysergide                                                                  |
| BIOMOL  | DL-506          | [C@]@H]1(O)[C@]@H]2O[C@]@H](CO)[C@H](O)[C@]@H](O)[C@]@H]2N<br>C)[C@]@](O)(C=O)[C@H](C)O[C@H]1O[C@]@H]3[C@]@H](O)[C@H](O)<br>[C@]@H](NC(=N)N)[C@H](O)[C@H]3NC(=N)N                             | C21H39N7O12   | 581.574 | Streptomycin sulfate                                                          |
| BIOMOL  | DL-107          | c1(OCC(O)CNC(C)C)ccc(CCC(=O)O)Ccc1                                                                                                                                                            | C16H25NO4     | 295.374 | Esmolol                                                                       |
| BIOMOL  | DL-507          | c1(NS(=O)(=O)c2ccc(N)cc2)ncnc(O)c1OC                                                                                                                                                          | C12H14N4O4S   | 310.329 | Sulfadoxine                                                                   |
| BIOMOL  | DL-123          | [C@H](O)(C(=O)NCCC(=O)O)C(C)C(CO                                                                                                                                                              | C9H17NO5      | 219.235 | Pantothenic acid                                                              |
| BIOMOL  | DL-508          | c1(ccc(N)cc1)S(=O)(=O)Nc2ncccn2                                                                                                                                                               | C10H10N4O2S   | 250.277 | Sulfadiazine                                                                  |
| BIOMOL  | DL-146          | c1(C(=O)CCc2ccc(O)cc2)c(O)cc(O)cc1O[C@H]3[C@H](O)[C@]@H](O)[C<br>@H](O)[C@]@H](CO)O3                                                                                                          | C21H24O10     | 436.409 | Phloridzin                                                                    |
| BIOMOL  | DL-509          | c1(nc(OC)nc(OC)c1)NS(=O)(=O)c2ccc(N)cc2                                                                                                                                                       | C12H14N4O4S   | 310.329 | Sulfadimethoxine                                                              |
| BIOMOL  | DL-225          | c1(ccccc1)[C@]@H](O)[C@]@H](N)C                                                                                                                                                               | C9H13NO       | 151.206 | Phenylpropanolamine                                                           |
| BIOMOL  | DL-510          | c1(ccc(N=Nc2ccc(O)c(C(=O)O)c2)cc1)S(=O)(=O)Nc3ncccc3                                                                                                                                          | C18H14N4O5S   | 398.393 | Sulfasalazine                                                                 |
| BIOMOL  | DL-234          | [N+](C)(C)(C)CCOC(=O)CCC(=O)OCC[N+](C)(C)C                                                                                                                                                    | C14H30N2O4    | 290.399 | Succinylcholine                                                               |
| BIOMOL  | DL-160          | c1(S(=O)(=O)N)cc(C[C@]@H](C)NCCOC2cccc2OCC)ccc1OC                                                                                                                                             | C20H28N2O5S   | 408.512 | Tamsulosin HCl                                                                |
| BIOMOL  | DL-195          | c1(ccccc(C(F)(F)F)c1)C2(O)CCN(CCC(=O)c3ccc(F)cc3)CC2                                                                                                                                          | C22H23F4NO2   | 409.417 | Trifluoperidol 2HCl                                                           |
| BIOMOL  | DL-511          | c1(cc(c2nc(c3n2C)cccc3)cc4C)c4nc(CCC)n1Cc5ccc(c6ccccc6C(=O)O)cc5                                                                                                                              | C33H30N4O2    | 514.617 | Telmisartan                                                                   |
| BIOMOL  | DL-540          | c1(cc(l)c(O)c(l)c1)Oc2c(l)c1)cc(C[C@H](N)C(=O)O)cc2l                                                                                                                                          | C15H11I4NO4   | 776.87  | L-thyroxine [(3-[4-(4-hydroxy-3,5-diiodophenoxy)-3,5-diiodophenyl]-l-alanine] |
| BIOMOL  | DL-512          | c(scc1)(C(O)=C(C(=O)Nc2ncccc2N(C)S3(=O)=O)c13                                                                                                                                                 | C13H11N3O4S2  | 337.374 | Tenoxicam                                                                     |
| BIOMOL  | DL-136          | C(=C(\CCN(C)C1)/C1)/(c2c(cccc2)C=C3)/c(cccc4)c34                                                                                                                                              | C21H21N       | 287.398 | Cyproheptadine                                                                |
| BIOMOL  | DL-513          | c(cc(OC)c(C)O)c1)(c(N)nc(N2CCN(C(=O)C3OCCCC)CC2)n4)c14                                                                                                                                        | C19H25N5O4    | 387.433 | Terazosin HCl                                                                 |
| BIOMOL  | DL-559          | c(cccc1)(n(Cc2cccc2)nc3OCCCN(C)C)c13                                                                                                                                                          | C19H23N3O     | 309.405 | Benzylamine                                                                   |
| Selleck | Chemicals S1011 | c1(F)ccc(Nc2c3c(cc(O)[C@]@H]4COCC4)c(NC(=O)C=CCN(C)C)c3)ncn2)cc<br>1Cl                                                                                                                        | C24H25ClFN5O3 | 485.938 | Afatinib (BIBW2992)                                                           |
| Selleck | Chemicals S1888 | C1=C[C@]@]2(C)C(C(C[C@]3([H])([C@]@]2([H])([C@H](O)C[C@]@]4(C)[C<br>@]@]3([H])C[C@]5([H])([C@]4(C(=O)CO)C(=O)C)N=C(C)O5)=CC1=O                                                                | C25H31NO6     | 441.517 | Deflazacort                                                                   |
| Selleck | Chemicals S1198 | N1(C2CCN(C(Oc3ccc(c4c3)nc5c(CN(C5=C6)C(=O)C7=C6[C@]@](CC)(O)C<br>(=O)O)C7)c4CC)=O)CC2)CCCCC1                                                                                                  | C33H38N4O6    | 586.678 | Irinotecan                                                                    |
| Selleck | Chemicals S1941 | c1cc(C[C@]@H](C(=O)OCC)N[C@]@H](C)C(=O)N2CCC[C@H]2C(=O)O)<br>ccc1.C(=O)(C=CC(=O)=O)O                                                                                                          | C24H32N2O9    | 492.519 | Enalapril Maleate                                                             |
| Selleck | Chemicals S1274 | N1(C(Nc2cccc(Nc3ncc(l)c(NCCCNC(=O)c4sccc4)n3)c2)=O)CCCC1                                                                                                                                      | C23H26ClN7O2S | 591.468 | BX-795                                                                        |
| Selleck | Chemicals S2013 | N1c(c2CCC1=O)ccc(Nc3ncc(C(F)(F)F)c(NCc4cccc(S(C(=O)=O)c4)n3)c2<br>C1([C@]@H]2[C@H]3C(C)(C)C(C34[C@]@]([H])(O)C(=O)[C@H]4O)O5)[<br>C@]@]5(C(=O)O2)[C@]6(O)[C@]@]([H])(O)C(=O)[C@]@H]6C)[C@H]1O | C22H20F3N5O3S | 491.486 | PF-573228                                                                     |
| Selleck | Chemicals S1343 |                                                                                                                                                                                               | C20H24O10     | 424.399 | Ginkgolide B                                                                  |
| Selleck | Chemicals S2054 | c1(ccccc1)C(c2c(C)cccc2)OCCN(C)C.Oc(=O)CC(O)(C(=O)O)CC(=O)O                                                                                                                                   | C24H31NO8     | 461.505 | Orphenadrine Citrate                                                          |
| Selleck | Chemicals S1389 | c1cc2c(nc(S(Cc3ncc(C)c(OC)c3C)=O)[nH]2)cc1OC                                                                                                                                                  | C17H19N3O3S   | 345.416 | Omeprazole                                                                    |
| Selleck | Chemicals S2096 | c1(CS(=O)(=O)N2CCCC2)cc3c([nH]cc3CCN(C)C)cc1.C(O)(=O)C(O)CC(=O)O                                                                                                                              | C21H31N3O7S   | 469.552 | Almotriptan Malate                                                            |
| Selleck | Chemicals S1544 | c1ccc2c(c(C(=O)c3c(l)ccc([N+])([O-])=O)c3)cn2CC4CCCCN4C)c1                                                                                                                                    | C22H22I3O3    | 503.333 | AM1241                                                                        |
| Selleck | Chemicals S2153 | c(ncn1[C@H]2[C@]@H](O)[C@H](O)[C@]@H](C(=O)NCC)O2)(c(N)nc(NC<br>Cc3ccc(CCC(=O)O)cc3)n4)c14.Cl                                                                                                 | C23H30ClN7O6  | 535.981 | CGS 21680 HCl                                                                 |
| Selleck | Chemicals S1638 | c1cc(C(C)C(=O)O)ccc1CC(C)C                                                                                                                                                                    | C13H18O2      | 206.281 | Ibuprofen                                                                     |

|           |       |                                                                                |                |          |                                     |
|-----------|-------|--------------------------------------------------------------------------------|----------------|----------|-------------------------------------|
| Selleck   |       | <chem>C1CCN(C2CCN(C(=O)O)c3cc4c(nc5c(CN6C5=CC7=C(COC(=O)[C@]7(O)C</chem>       |                |          |                                     |
| Chemicals | S2217 | <chem>C)C6=O)c4CC(cc3)CC2)CC1.Cl.O.O.O</chem>                                  | C33H45ClN4O9   | 677.185  | Irinotecan HCl Trihydrate           |
| Selleck   |       | <chem>C1C[C@@]2(C)C(C[C@]3([H])[C@@]2([H])[C@H](O)C[C@@]4(C)[C@</chem>         |                |          |                                     |
| Chemicals | S1696 | <chem>@]3([H])C[C@]4(O)C(CO)=O)=CC1=O</chem>                                   | C21H30O5       | 362.46   | Hydrocortisone                      |
| Selleck   |       |                                                                                |                |          |                                     |
| Chemicals | S2293 | <chem>OC(=O)CC(C[N+](C)(C)C)O.[Cl-]</chem>                                     | C7H16ClNO3     | 197.66   | DL-Carnitine HCl                    |
| Selleck   |       | <chem>OC(=O)C=CC(=O)O.c1cc2c(Sc3c(cccc3)C(N4CCN(CCOCCO)CC4)=N2)cc</chem>       |                |          |                                     |
| Chemicals | S1763 | <chem>1.c5cc6c(Sc7c(cccc7)C(N8CCN(CCOCCO)CC8)=N6)cc5</chem>                    | C46H54N6O8S2   | 883.086  | Quetiapine Fumarate                 |
| Selleck   |       | <chem>c1(O)cc2c(C(=O)C(O)[C@H]3[C@@H](O)[C@H](O)[C@@H](O)[C@H](C</chem>        |                |          |                                     |
| Chemicals | S2327 | <chem>O3)=C(c4cc(O)c(O)c(O)c4)O2)c(O)c1</chem>                                 | C21H20O12      | 464.376  | Myricitrin                          |
| Selleck   |       | <chem>c(C(=O)C=C(c1[nH]nnn1)O2)(ccc(NC(=O)c3ccc(OCCCCc4ccccc4)cc3)c5)c</chem>  |                |          |                                     |
| Chemicals | S1829 | <chem>25</chem>                                                                | C27H23N5O4     | 481.503  | Pranlukast                          |
| Selleck   |       |                                                                                |                |          |                                     |
| Chemicals | S2363 | <chem>c1(O)c(O)c(O)c2c(C(=O)C=C(c3ccc(O)C)cc3)O2)c(O)c1OC</chem>               | C20H20O7       | 372.369  | Tangeretin                          |
| Selleck   |       |                                                                                |                |          |                                     |
| Chemicals | S2393 | <chem>OC[C@@H](O)[C@@H](O)[C@H](O)[C@@H](O)CO</chem>                           | C6H14O6        | 182.172  | Sorbitol                            |
| Selleck   |       |                                                                                |                |          |                                     |
| Chemicals | S2872 | <chem>c1c(l)ccc2c1C(=Cc3cc(Br)c(O)c(Br)c3)C(=O)N2</chem>                       | C15H8Br2INO2   | 520.942  | GW5074                              |
| Selleck   |       |                                                                                |                |          |                                     |
| Chemicals | S2450 | <chem>C1Oc2c(ccc(O)c2)C[C@H]1c3ccc(O)cc3</chem>                                | C15H14O3       | 242.27   | Equol                               |
| Selleck   |       |                                                                                |                |          |                                     |
| Chemicals | S2886 | <chem>c1(cc(NC(=O)CN(C)C)cc2)c2NC(=O)c3c1cccc3</chem>                          | C17H17N3O2     | 295.336  | PJ34                                |
| Selleck   |       | <chem>O1C(=O)C(O)=C(O)[C@@]1([H])[C@@H](O)COC(=O)CCCCCCCCCCC</chem>            |                |          |                                     |
| Chemicals | S2532 | <chem>CCC</chem>                                                               | C22H38O7       | 414.533  | L-Ascorbyl 6-palmitate              |
| Selleck   |       | <chem>c1(nc(C(C)C)sc1)CN(C)C(=O)N[C@@H](CCN2CCOCC2)C(=O)N[C@@H](</chem>        |                |          |                                     |
| Chemicals | S2900 | <chem>Cc3cccc3)C[C@H](Cc4ccccc4)NC(=O)OCc5scnc5</chem>                         | C40H53N7O5S2   | 776.023  | Cobicistat (GS-9350)                |
| Selleck   |       |                                                                                |                |          | Brompheniramine                     |
| Chemicals | S2585 | <chem>c1(ccc(Br)cc1)C(c2ncccc2)CCN(C)C.OC(=O)C=CC(=O)O</chem>                  | C20H23BrN2O4   | 435.312  | hydrogen maleate                    |
| Selleck   |       |                                                                                |                |          |                                     |
| Chemicals | S2910 | <chem>C1(C)(C)CC(O)CC(C)(C)N1[O]</chem>                                        | C9H18NO2       | 172.245  | Tempol                              |
| Selleck   |       |                                                                                |                |          |                                     |
| Chemicals | S2691 | <chem>c1cc(N2CCN(CCN3C(=O)CC4(CCCC4)CC3=O)CC2)c(O)C)cc1.Cl.Cl</chem>           | C22H33Cl2N3O3  | 458.422  | BMV 7378                            |
| Selleck   |       |                                                                                |                |          |                                     |
| Chemicals | S2919 | <chem>C(O)(=O)CNC(C1=C(O)c(c2N(Cc3cccc3)C1=O)cccc2)=O</chem>                   | C19H16N2O5     | 352.341  | IOX2                                |
| Selleck   |       |                                                                                |                |          |                                     |
| Chemicals | S2804 | <chem>C(NC(c1cccc1)C)(=O)c2cccc2N=Cc3c(c4ccc3O)cccc4</chem>                    | C26H22N2O2     | 394.465  | Sirtinol                            |
| Selleck   |       |                                                                                |                |          |                                     |
| Chemicals | S2930 | <chem>c1cc(C#CS(=O)(=O)N)ccc1</chem>                                           | C8H7NO2S       | 181.212  | Pifithrin-?                         |
| Selleck   |       |                                                                                |                |          |                                     |
| Chemicals | S2819 | <chem>n1(c2ccc(Cl)cc2Cl)c(c3ccc(l)cc3)c(C)c(C(NN4CCCC4)=O)n1</chem>            | C22H21Cl2IN4O  | 555.239  | AM251                               |
| Selleck   |       | <chem>c1([C@@H]2N(CC(NC(=O)N3P(O)(=O)O)=N3)CCO[C@@H]2O[C@H](C</chem>           |                |          |                                     |
| Chemicals | S3038 | <chem>c4cc(C(F)(F)F)cc(C(F)(F)F)c4ccc(F)cc1.CNC[C@H](O)[C@@H](O)[C@</chem>     |                |          |                                     |
| Selleck   |       | <chem>H](O)[C@H](O)CO.CNC[C@H](O)[C@@H](O)[C@H](O)[C@H](O)CO</chem>            | C37H56F7N6O16P | 1004.834 | Fosaprepitant<br>dimethylamine salt |
| Chemicals | S2842 | <chem>c(ccc(C#C[C@@])(CO)C(O)n1)(C(=O)C(C(=O)NC)=C(N)N2CC)c12</chem>           | C18H22N4O4     | 358.392  | SAR131675                           |
| Selleck   |       | <chem>c(C=C1CCN(Cc2cc(C)cnc2)CC1)c3c(cc(Cl)cc3)CC4)(ncccc)c45.C(O)(=O)C</chem> |                |          |                                     |
| Chemicals | S3052 | <chem>=CC(O)=O</chem>                                                          | C30H30ClN3O4   | 532.03   | Rupatadine Fumarate                 |
| Selleck   |       |                                                                                |                |          |                                     |
| Chemicals | S2855 | <chem>C(NCCCCNC(=S)Nc1cccc(N=C=S)c1)(=S)Nc2cccc(N=C=S)c2</chem>                | C20H20N6S4     | 472.673  | MRS 2578                            |
| Selleck   |       |                                                                                |                |          |                                     |
| Chemicals | S3067 | <chem>C(Nc1ccc(Cl)cc1)(=N)NC(=N)NCCCCCNC(=N)NC(Nc2ccc(Cl)cc2)=N.Cl.Cl</chem>   | C22H32Cl4N10   | 578.368  | Chlorhexidine HCl                   |
| Selleck   |       |                                                                                |                |          |                                     |
| Chemicals | S2863 | <chem>c1cc2c(nc(N)n2S(=O)(c3ccc(C)cc3)=O)cc1</chem>                            | C14H13N3O2S    | 287.337  | ML130 (Nodinitib-1)                 |
| Selleck   |       | <chem>[C@H]1(c2ccc(N(C)C)cc2)C[C@@]3(C)[C@@]([H])(CC[C@@]3(O)C(=O)C</chem>     |                |          |                                     |
| Chemicals | S3081 | <chem>)C(C)=O)[C@@]4([H])C1=C5C(=CC(=O)CC5)CC4</chem>                          | C30H37NO4      | 475.619  | Ulipristal                          |
| Selleck   |       |                                                                                |                |          |                                     |
| Chemicals | S1014 | <chem>n1c(c2c(Nc3cc(O)C(Cl)cc3Cl)c(C#N)c1)cc(OCCCN4CCN(C)CC4)c(O)C2</chem>     | C26H29Cl2N5O3  | 530.446  | Bosutinib (SKI-606)                 |
| Selleck   |       |                                                                                |                |          |                                     |
| Chemicals | S1890 | <chem>s1cc(CSCCNC(NC)=C[N+](O-)=O)nc1CN(C)C</chem>                             | C12H21N5O2S2   | 331.457  | Nizatidine                          |
| Selleck   |       | <chem>S([O-])</chem>                                                           |                |          |                                     |
| Chemicals | S1214 | <chem>)](O)(=O)=O.[C@@H](NC(=O)c1c(C)c(N)nc([C@H](CC(=O)N)NC[C@@H</chem>       |                |          |                                     |
| Selleck   |       | <chem>](N)C(=O)N)n1)(C(=O)N[C@@H](C)[C@H](O)[C@@H](C)C(=O)N[C@@</chem>         |                |          |                                     |
| Chemicals | S1958 | <chem>H](C(=O)NCCC2sc(C3sc(C(=O)NCCC[S+](C)C)n3n2)[C@H](O)C)C(O)[C</chem>      |                |          |                                     |
| Selleck   |       | <chem>@H]4O[C@H](CO)[C@H](O)[C@@H](O)[C@@]4([H])O[C@H]5O[C@H](</chem>          |                |          |                                     |
| Chemicals | S1214 | <chem>CO)[C@@H](O)[C@H](OC(=O)N)[C@@H]5O)c6c[nH]cn6</chem>                     | C55H85N17O25S4 | 1512.622 | Bleomycin Sulfate                   |
| Selleck   |       |                                                                                |                |          |                                     |
| Chemicals | S1958 | <chem>C1(=O)N2[C@]([H])(S(=O)(=O)C(C)(C)[C@]2(C(=O)O)[H])C1</chem>             | C8H11NO5S      | 233.242  | Sulbactam                           |



|                      |       |                                                                                                                                                                                                                                                                                                                                      |                |          |                     |
|----------------------|-------|--------------------------------------------------------------------------------------------------------------------------------------------------------------------------------------------------------------------------------------------------------------------------------------------------------------------------------------|----------------|----------|---------------------|
| Selleck<br>Chemicals | S1284 | <chem>N1(CC(=O)O)c2c(cccc2)CC[C@H](N[C@@H](CCc3ccccc3)C(=O)OCC)C1=O.Cl</chem>                                                                                                                                                                                                                                                        | C24H29ClN2O5   | 460.95   | Benazepril HCl      |
| Selleck<br>Chemicals | S2017 | <chem>c1(cccc([N+])([O-])=O)c1[C@@H]2C(C(=O)OC)=C(C)NC(C)=C2C(=O)O[C@H]3CN(Cc4ccc4)CC3.Cl</chem>                                                                                                                                                                                                                                     | C28H32ClN3O6   | 542.023  | Benidipine HCl      |
| Selleck<br>Chemicals | S1351 | <chem>[C@](O)(C1=CC=C[C@H](C)[C@H](O[C@]2([H])O[C@@H](C)[C@H](O[C@]3([H])O[C@@H](C)[C@H](O)[C@@H](OC)C3)[C@@H](OC)C2)C(C)=CC[C@]([H])(C[C@@H]4OC5=O)O[C@@]6(CC[C@H](C)[C@@]([H])([C@H](CC(C)O6)C4)([C@]5([H])C=C(C)[C@H]7O)[C@]7([H])OC1NC(=N)NCCC[C@]([H])(NS(=O)=O)(=O)c1c2c(CC(C)CN2)ccc1)C(=O)N3[C@H](C(O)=O)C[C@H](C)CC3</chem> | C48H74O14      | 875.093  | Ivermectin          |
| Selleck<br>Chemicals | S2069 | <chem>C1(=C2CCN(C)CC2)c3c(cccc3)CCc4c1ccs4.C(O)(=O)C(O)CC(O)=O</chem>                                                                                                                                                                                                                                                                | C23H27NO5S     | 429.529  | Pizotifen Malate    |
| Selleck<br>Chemicals | S2099 | <chem>c1ccc(C[C@@H](C(=O)OCC)N[C@H]2CS[C@H](c3cccs3)CN(CC(=O)O)C2=O)ccc1.Cl</chem>                                                                                                                                                                                                                                                   | C23H29ClN2O5S2 | 513.07   | Temocapril HCl      |
| Selleck<br>Chemicals | S1578 | <chem>c1(Cn2c(OCC)nc3c2c(C(=O)O)ccc3)ccc(c4c(c5[nH]nn5)cccc4)cc1</chem>                                                                                                                                                                                                                                                              | C24H20N6O3     | 440.454  | Candesartan         |
| Selleck<br>Chemicals | S2160 | <chem>c1cccc([C@H](N2[C@@H](CCc3ccc(C(F)(F)F)cc3)c4c(cc(OC)c(O)c4)CC2)C(=O)NC)c1.Cl</chem>                                                                                                                                                                                                                                           | C29H32ClF3N2O3 | 549.024  | Almorexant HCl      |
| Selleck<br>Chemicals | S1640 | <chem>c1(SCCC)cc2c(nc(NC(=O)OC)[nH]2)cc1</chem>                                                                                                                                                                                                                                                                                      | C12H15N3O2S    | 265.331  | Albendazole         |
| Selleck<br>Chemicals | S2228 | <chem>c1(C(=O)N[C@@H](C(C)(C)C)N2CCC[C@H]2C(=O)N[C@@H]3[C@@H](OCC)OC(=O)C3=O)ccc(N)c(Cl)c1</chem>                                                                                                                                                                                                                                    | C24H33ClN4O6   | 508.995  | VX-765              |
| Selleck<br>Chemicals | S1703 | <chem>C(CCC)(CCC)C(=O)[O-].[Na+].C(O)(=O)C(CCC)CCC</chem>                                                                                                                                                                                                                                                                            | C16H31NaO4     | 310.405  | Divalproex Sodium   |
| Selleck<br>Chemicals | S2303 | <chem>c1(C=O)c2c(cc(C)c(c3c(C)cc4c(c(C=O)c(O)c(O)c4(C)C)c3O)c2O)c(C(C)C)c(O)c1O</chem>                                                                                                                                                                                                                                               | C30H30O8       | 518.554  | Gossypol            |
| Selleck<br>Chemicals | S1771 | <chem>c1cc2c(C(=CCN(C)C)c3c(ccc(C)C3)S2)cc1</chem>                                                                                                                                                                                                                                                                                   | C18H18ClNS     | 315.86   | Chlorprothixene     |
| Selleck<br>Chemicals | S2329 | <chem>c1c(O)c2c(O[C@H](c3ccc(O)cc3)CC2=O)cc1O[C@H]4[C@@H](O[C@H]5[C@@H](O)[C@H](O)[C@@H](O)[C@H](C)O5)[C@@H](O)[C@H](O)[C@@H](O)[C@H](CO)O4</chem>                                                                                                                                                                                   | C27H32O14      | 580.535  | Naringin            |
| Selleck<br>Chemicals | S1832 | <chem>c1(O)c2c(C(Cc3cc(OC)c(OC)cc3)[N+](C)(CCC(=O)O)CCCCCO C(=O)CC[N+](4(C)CCc(c5C4c6cc(OC)c(OC)cc6)cc(OC)c(OC)c5)CC2)cc1O.C.c7c(S(=O)(=O)[O-])cccc7.c8c(S(=O)(=O)[O-])cccc8</chem>                                                                                                                                                  | C65H82N2O18S2  | 1243.479 | Atracurium Besylate |
| Selleck<br>Chemicals | S2369 | <chem>c1c(O)c2c(Oc(c3ccc(OCCO)c(OCCO)c3)=C(O)[C@H]4[C@H](O)[C@@H](O)[C@H](O)[C@H](CO[C@@H]5O[C@@H](C)[C@H](O)[C@@H](O)[C@H]5O)O4)C2=O)cc1OCCO</chem>                                                                                                                                                                                 | C33H42O19      | 742.675  | Troloxerutin        |
| Selleck<br>Chemicals | S2397 | <chem>c1cc2c(c[n+]3c(c4c(cc(OC)c(OC)c4)CC3)c2c(OC)c1OC.[Cl-]</chem>                                                                                                                                                                                                                                                                  | C21H22ClNO4    | 387.857  | Palmitine chloride  |
| Selleck<br>Chemicals | S2874 | <chem>c1(ccc(NC(=N)N)cc1)C(=O)Oc2ccc(CC(=O)OCC(=O)N(C)C)cc2.S(=O)(=O)(O)C</chem>                                                                                                                                                                                                                                                     | C21H26N4O8S    | 494.518  | Camostat Mesilate   |
| Selleck<br>Chemicals | S2454 | <chem>c1c(C)c(NC(=O)C2CCCCN2CCCC)c(C)cc1.Cl</chem>                                                                                                                                                                                                                                                                                   | C18H29ClN2O    | 324.889  | Bupivacaine HCl     |
| Selleck<br>Chemicals | S2890 | <chem>c1ccc(CNc2nc(Nc3cc4c(NC(=O)C4)cc3)ncc2C(F)(F)F)c(N(S(C(=O)O)O)C)n1</chem>                                                                                                                                                                                                                                                      | C21H20F3N7O3S  | 507.489  | PF-562271           |
| Selleck<br>Chemicals | S2538 | <chem>CC(Nc1ccccc1)=O</chem>                                                                                                                                                                                                                                                                                                         | C8H9NO         | 135.163  | Acetanilide         |
| Selleck<br>Chemicals | S2901 | <chem>c1(F)ccc(CN2C(=O)SN(c3ccc(C)cc3)C2=O)cc1</chem>                                                                                                                                                                                                                                                                                | C16H13FN2O2S   | 316.35   | CCG 50014           |
| Selleck<br>Chemicals | S2590 | <chem>c1(CC)cnc(CCOc2ccc(CC3SC(=O)NC3=O)cc2)cc1</chem>                                                                                                                                                                                                                                                                               | C19H20N2O3S    | 356.439  | Pioglitazone        |
| Selleck<br>Chemicals | S2911 | <chem>c1(OC)cc2c(n(CCCN(C)C)cc2C3=C(c4c[nH]c5c4cccc5)C(=O)NC3=O)cc1</chem>                                                                                                                                                                                                                                                           | C26H26N4O3     | 442.51   | Go 6983             |
| Selleck<br>Chemicals | S2693 | <chem>c1cc(CN(C)C)ccc1S(=O)(=O)n2cc(C=CC(=O)NO)cc2</chem>                                                                                                                                                                                                                                                                            | C16H19N3O4S    | 349.405  | Resminostat         |
| Selleck<br>Chemicals | S2921 | <chem>c1(cnn(C)c1c2ccc(C)cc2)c3nn(C)c4c3c(N5CC[C@H](N6CCCC6)C5)ncn4</chem>                                                                                                                                                                                                                                                           | C26H32N8       | 456.586  | PF-4981517          |
| Selleck<br>Chemicals | S2806 | <chem>c1(N2CCN(C)CC2)cc(Nc3nn4c(c(c5ccc(S(=O)(C)=O)cc5)ccc4)n3)ccc1</chem>                                                                                                                                                                                                                                                           | C24H26N6O2S    | 462.567  | CEP-33779           |
| Selleck<br>Chemicals | S3002 | <chem>c1cc(N2CCOCC2=O)ccc1N3CC(CNC(=O)c4ccc(Cl)s4)OC3=O</chem>                                                                                                                                                                                                                                                                       | C19H18ClN3O5S  | 435.881  | Rivaroxaban         |
| Selleck<br>Chemicals | S2821 | <chem>[C@@]([H])(C(=O)O)(Cc1c[nH]c2c1cccc2)N3C(=O)c(c4C3=O)cccc4</chem>                                                                                                                                                                                                                                                              | C19H14N2O4     | 334.325  | RG108               |
| Selleck<br>Chemicals | S3042 | <chem>c(n(C1CCCC1)cn2)(nc(Oc3cccc4c3cccc4)nc5Nc6ccc(N7CCOCC7)cc6)c25</chem>                                                                                                                                                                                                                                                          | C31H32N6O2     | 520.625  | Purmorphamine       |
| Selleck<br>Chemicals | S2843 | <chem>c1(O)c(F)cc(Nc2ncc3c(N(CCC(C)C)C(C)C(=O)N3C)n2)cc1F</chem>                                                                                                                                                                                                                                                                     | C19H23F2N5O2   | 391.415  | BI-D1870            |

|           |       |                                                                                                                                                |                             |         |                               |
|-----------|-------|------------------------------------------------------------------------------------------------------------------------------------------------|-----------------------------|---------|-------------------------------|
| Selleck   |       | <chem>C(N)(NC(C)=C(C(OC(C)C)=O)C1c2cccc([N+])([O-])=O)c2)=C1C(O C3CN(C(c4cccc4)c5cccc5)C3)=O</chem>                                            | <chem>C33H34N4O6</chem>     | 582.646 | Azelinidipine                 |
| Chemicals | S3053 |                                                                                                                                                |                             |         |                               |
| Selleck   |       | <chem>c(ccc(C)C1)(sc(S(Nc2ccc(OC)c(N3CCNCC3)c2)(=O)=O)c4C)c14</chem>                                                                           | <chem>C20H22ClN3O3S2</chem> | 451.99  | SB271046                      |
| Chemicals | S2856 |                                                                                                                                                |                             |         |                               |
| Selleck   |       | <chem>C(=O)c1ccc(O)c(OC)c1</chem>                                                                                                              | <chem>C8H8O3</chem>         | 152.147 | Vanillin                      |
| Chemicals | S3071 |                                                                                                                                                |                             |         |                               |
| Selleck   |       | <chem>c1c(O)c(C(=O)Nc2cc(C(F)(F)F)cc(C(F)(F)F)c2)cc(Cl)c1</chem>                                                                               | <chem>C15H8ClF6NO2</chem>   | 383.673 | IMD 0354                      |
| Chemicals | S2864 |                                                                                                                                                |                             |         |                               |
| Selleck   |       | <chem>N1c(c2C=CC1=O)c(O)ccc2[C@@H](O)CNC3Cc(c4C3)cc(Cc(C)CC)c4.C(=CC(O)=O)C(O)=O</chem>                                                        | <chem>C28H32N2O7</chem>     | 508.563 | Indacaterol Maleate           |
| Chemicals | S3083 |                                                                                                                                                |                             |         | Dovitinib (TKI-258, CHIR-258) |
| Selleck   |       | <chem>c1c2c(C(N)=C(c3nc4c(cc(N5CCN(C)CC5)cc4)[nH]3)C(=O)N2)c(F)cc1</chem>                                                                      | <chem>C21H21FN6O</chem>     | 392.429 |                               |
| Chemicals | S1018 |                                                                                                                                                |                             |         |                               |
| Selleck   |       | <chem>c1(CN(C(CCCC)=O)[C@]([H])([H])(C(O)=O)C(C)C)ccc(c2c(c3n[nH]nn3)cccc2)c1</chem>                                                           | <chem>C24H29N5O3</chem>     | 435.519 | Valsartan                     |
| Chemicals | S1894 |                                                                                                                                                |                             |         |                               |
| Selleck   |       | <chem>c1(NS(c2cccc2OC)(=O)=O)cc3c(NC(=O)N(C)C3)cc1</chem>                                                                                      | <chem>C16H17N3O4S</chem>    | 347.389 | PFI-1 (PF-6405761)            |
| Chemicals | S1216 |                                                                                                                                                |                             |         |                               |
| Selleck   |       | <chem>c1(ccccc1C(=O)O)Nc2c(C)c(Cl)ccc2</chem>                                                                                                  | <chem>C14H12ClNO2</chem>    | 261.704 | Tolfenamic Acid               |
| Chemicals | S1959 |                                                                                                                                                |                             |         |                               |
| Selleck   |       | <chem>c1c(C2C(C(=O)O)CCOC)=C(C)NC(C)=C2C(=O)OCC=Cc3cccc3)cc([N+])([O-])=O)c1</chem>                                                            | <chem>C27H28N2O7</chem>     | 492.52  | Cilnidipine                   |
| Chemicals | S1293 |                                                                                                                                                |                             |         |                               |
| Selleck   |       | <chem>OC(=O)C=CC(=O)O.c1cc(C[C@H](C)NC[C@@H](O)c2cc(NC=O)c(O)cc2)ccc1OC.c3cc(C[C@H](C)NC[C@@H](O)c4cc(NC=O)c(O)cc4)ccc3OC</chem>               | <chem>C42H52N4O12</chem>    | 804.882 | Formoterol Hemifumarate       |
| Chemicals | S2020 |                                                                                                                                                |                             |         |                               |
| Selleck   |       | <chem>c1(N2CCN(C(C=O)CC2)ccc(O[C@H]3CO[C@@](c4c(Cl)cc(Cl)cc4)(Cn5cncc5)O3)cc1</chem>                                                           | <chem>C26H28Cl2N4O4</chem>  | 531.431 | Ketoconazole                  |
| Chemicals | S1353 |                                                                                                                                                |                             |         |                               |
| Selleck   |       | <chem>c1(OC)cc2c(CN(C[C@@H](N[C@@H](CCc3cccc3)C(OCC)=O)C)=O)[C@@H](C(=O)O)C2)cc1OC.Cl</chem>                                                   | <chem>C27H35ClN2O7</chem>   | 535.029 | Moexipril HCl                 |
| Chemicals | S2079 |                                                                                                                                                |                             |         |                               |
| Selleck   |       | <chem>c1(CS(=O)(=O)NC)cc2c([nH]cc2CCN(C)C)cc1.Oc(=O)CCC(=O)O</chem>                                                                            | <chem>C18H27N3O6S</chem>    | 413.488 | Sumatriptan Succinate         |
| Chemicals | S1432 |                                                                                                                                                |                             |         |                               |
| Selleck   |       | <chem>c1cc2c(C[C@@H]2NCC#C)cc1.O=S(O)(C)=O</chem>                                                                                              | <chem>C13H17NO3S</chem>     | 267.344 | Rasagiline Mesylate           |
| Chemicals | S2102 |                                                                                                                                                |                             |         |                               |
| Selleck   |       | <chem>n1(c(C(=O)O)CC2=C(C)OC(=O)O2)c(C(C)C(O)nc1CCC)Cc3ccc(c4c(c5nn[nH]n5)cccc4)cc3</chem>                                                     | <chem>C29H30N6O6</chem>     | 558.585 | Olmesartan Medoxomil          |
| Chemicals | S1604 |                                                                                                                                                |                             |         |                               |
| Selleck   |       | <chem>[nH]1c2c(cc(C(F)(F)F)cc2)nc1CN3CCN(c4c(CC)cncn4)CC3</chem>                                                                               | <chem>C19H21F3N6</chem>     | 390.405 | PF-4708671                    |
| Chemicals | S2163 |                                                                                                                                                |                             |         |                               |
| Selleck   |       | <chem>c1c2c([nH]cc2CCN(C)C)ccc1C[C@H]3COc(=O)N3</chem>                                                                                         | <chem>C16H21N3O2</chem>     | 287.357 | Zolmitriptan                  |
| Chemicals | S1649 |                                                                                                                                                |                             |         |                               |
| Selleck   |       | <chem>c1(O)c2c([n-]c(S(=O)Cc3c(C)c(O)C)c(C)n3)n2)cc1.[Na+]</chem>                                                                              | <chem>C17H18N3NaO3S</chem>  | 367.398 | Esomeprazole Sodium           |
| Chemicals | S2233 |                                                                                                                                                |                             |         |                               |
| Selleck   |       | <chem>C1CC(NC(=O)NS(=O)(=O)c2ccc(CCNC(=O)c3cc(Cl)ccc3OC)cc2)CCC1</chem>                                                                        | <chem>C23H28ClN3O5S</chem>  | 494.004 | Glyburide                     |
| Chemicals | S1716 |                                                                                                                                                |                             |         |                               |
| Selleck   |       | <chem>c(c(CN(C)C)c[nH]1)(cccc2)c12</chem>                                                                                                      | <chem>C11H14N2</chem>       | 174.242 | Gramine                       |
| Chemicals | S2304 |                                                                                                                                                |                             |         |                               |
| Selleck   |       | <chem>c1cc(C(=C(CCl)c2cccc2)c3cccc3)ccc1OCCN(C)C.Oc(=O)CC(O)(C(O)=O)CC(O)=O</chem>                                                             | <chem>C32H36ClNO8</chem>    | 598.083 | Toremifene Citrate            |
| Chemicals | S1776 |                                                                                                                                                |                             |         |                               |
| Selleck   |       | <chem>c1c(O)c2c(O[C@H](c3cc(O)cc(O)C3)CC2=O)cc1O[C@H]4[C@@H](O)[C@@H]5[C@@H](O)[C@H](O)[C@@H](O)[C@H](O)5][C@@H](O)[C@H](O)[C@@H](CO)O4</chem> | <chem>C28H34O15</chem>      | 610.561 | Neohesperidin                 |
| Chemicals | S2332 |                                                                                                                                                |                             |         |                               |
| Selleck   |       | <chem>c1(C)[nH]cnc1CSCCN(C)C(=NC#N</chem>                                                                                                      | <chem>C10H16N6S</chem>      | 252.339 | Cimetidine                    |
| Chemicals | S1845 |                                                                                                                                                |                             |         |                               |
| Selleck   |       | <chem>c1cc(CCC(=O)C)cc(OC)c1O</chem>                                                                                                           | <chem>C11H14O3</chem>       | 194.227 | Vanillylacetone               |
| Chemicals | S2371 |                                                                                                                                                |                             |         |                               |
| Selleck   |       | <chem>[C@H]1(O)[C@@H](O)[C@@H](O)[C@H](O)[C@H]2[C@]3([H])[C@]([H])(CC=C3CO)C(C(OC)=O)=CO2)O[C@@H]1CO</chem>                                    | <chem>C17H24O10</chem>      | 388.366 | Geniposide                    |
| Chemicals | S2411 |                                                                                                                                                |                             |         |                               |
| Selleck   |       | <chem>c1(C(=O)NC2CCN(CCCOC)CC2)cc(Cl)c(N)c3c1OCC3</chem>                                                                                       | <chem>C18H26ClN3O3</chem>   | 367.87  | Prucalopride                  |
| Chemicals | S2875 |                                                                                                                                                |                             |         |                               |
| Selleck   |       | <chem>c1cc([N+])(=O)[O-])cc(C2C(C(OC)=O)=C(C)NC(C)=C2C(OCC)=O)c1</chem>                                                                        | <chem>C18H20N2O6</chem>     | 360.361 | Nitrendipine                  |
| Chemicals | S2491 |                                                                                                                                                |                             |         |                               |
| Selleck   |       | <chem>c1(C(Nc2ccc(Cl)c(O)C2)=O)ncccc1</chem>                                                                                                   | <chem>C13H11ClN2O2</chem>   | 262.692 | VU 0361737                    |
| Chemicals | S2892 |                                                                                                                                                |                             |         |                               |
| Selleck   |       | <chem>c1cc(O)c([C@H](CCN(C(C)C)C(C)C)c2cccc2)cc1C.O=C([C@H](O)[C@@H](O)C(=O)O)O</chem>                                                         | <chem>C26H37NO7</chem>      | 475.574 | Tolterodine tartrate          |
| Chemicals | S2550 |                                                                                                                                                |                             |         | S-Ruxolitinib                 |
| Selleck   |       | <chem>n1cnc(c2cnn([C@@H](CC#N)C3CCCC3)c2)c4c1[nH]cc4</chem>                                                                                    | <chem>C17H18N6</chem>       | 306.365 | (INCB018424)                  |
| Chemicals | S2902 |                                                                                                                                                |                             |         |                               |
| Selleck   |       | <chem>c1cc2c(C(=O)O)nn2Cc3ccc(Cl)cc3Cl)cc1</chem>                                                                                              | <chem>C15H10Cl2N2O2</chem>  | 321.158 | Londamine                     |
| Chemicals | S2610 |                                                                                                                                                |                             |         |                               |
| Selleck   |       | <chem>c1(CNc2cccc2)ccc(CNc3cccc3)cc1</chem>                                                                                                    | <chem>C18H18N4</chem>       | 290.362 | WZ811                         |
| Chemicals | S2912 |                                                                                                                                                |                             |         |                               |

|           |       |                                                                                                                                                                                                                                                |                 |          |                        |  |  |
|-----------|-------|------------------------------------------------------------------------------------------------------------------------------------------------------------------------------------------------------------------------------------------------|-----------------|----------|------------------------|--|--|
| Selleck   |       |                                                                                                                                                                                                                                                |                 |          |                        |  |  |
| Chemicals | S2694 | c1cc2c([nH]c3c2C(C)(C)CN(C(=O)c4cc(F)c(F)cc4)C=C3C(OC(C)C)=O)cc1                                                                                                                                                                               | C25H24F2N2O3    | 438.466  | XL335                  |  |  |
| Selleck   |       |                                                                                                                                                                                                                                                |                 |          |                        |  |  |
| Chemicals | S2922 | c1c(Nc2c3c(cc4c(OCOCOCOCOC4)c3)ncn2)cccc1C#C                                                                                                                                                                                                   | C22H21N3O4      | 391.42   | Icotinib               |  |  |
| Selleck   |       |                                                                                                                                                                                                                                                |                 |          |                        |  |  |
| Chemicals | S2809 | c1(C)nc(C#Cc2ccccc2)ccc1                                                                                                                                                                                                                       | C14H11N         | 193.244  | MPEP                   |  |  |
| Selleck   |       | [C@H]1(NC([C@H](N)c2ccc(O)cc2)=O)[C@@]3([H])N([C@H](C(O)=O)C(C)(C)S3)C1=O                                                                                                                                                                      | C16H19N3O5S     | 365.404  | Amoxicillin            |  |  |
| Selleck   |       |                                                                                                                                                                                                                                                |                 |          |                        |  |  |
| Chemicals | S2822 | c1(F)cc2c(n(CC(=O)O)c(C)c2Cc3nc4c(cccc4)cc3)cc1                                                                                                                                                                                                | C21H17FN2O2     | 348.37   | OC000459               |  |  |
| Selleck   |       |                                                                                                                                                                                                                                                |                 |          |                        |  |  |
| Chemicals | S3043 | c1cc(C(COC2=O)=C2c3ccccc3)ccc1S(=O)(=O)C                                                                                                                                                                                                       | C17H14O4S       | 314.356  | Rofecoxib              |  |  |
| Selleck   |       |                                                                                                                                                                                                                                                |                 |          |                        |  |  |
| Chemicals | S2845 | c1cc2c(NC(=O)C2=Cc3c(C)cc(C)[nH]3)cc1                                                                                                                                                                                                          | C15H14N2O       | 238.284  | Semaxanib (SU5416)     |  |  |
| Selleck   |       |                                                                                                                                                                                                                                                |                 |          |                        |  |  |
| Chemicals | S3054 | c1(CCCN(CC)CCCc2ccccc2)ccccc1.C(C(O)=O)C(O)(C(O)=O)CC(O)=O                                                                                                                                                                                     | C26H35NO7       | 473.559  | Alverine Citrate       |  |  |
| Selleck   |       |                                                                                                                                                                                                                                                |                 |          |                        |  |  |
| Chemicals | S2857 | c(cccc1)(C[C@@H](N[C@]23C)c4c2ccccc4)c13                                                                                                                                                                                                       | C16H15N         | 221.297  | MK-801 (Dizocilpine)   |  |  |
| Selleck   |       | [C@@H]1(O)C[C@]2([H])N(C(=O)[C@]([H])([C@H](O)C)NC(=O)[C@@H](NC(=O)CCCCCCC[C@H](C)C[C@H](C)CC)[C@H](O)[C@H](NCN)NC(=O)[C@@]3([H])N(CC[C@H]3O)C(=O)[C@@]([H])([C@H](O)CCN)NC(=O)[C@]([H])([C@H]([C@H](c4ccc(O)cc4)O)O)NC2=O)C1.C(C(O)=O.CC(O)=O | C56H96N10O19    | 1213.417 | Caspofungin Acetate    |  |  |
| Chemicals | S3073 |                                                                                                                                                                                                                                                |                 |          |                        |  |  |
| Selleck   |       |                                                                                                                                                                                                                                                |                 |          |                        |  |  |
| Chemicals | S2865 | c1cc2c(nc(Cl)c(N3CCN(C)CC3)n2)cc1                                                                                                                                                                                                              | C13H15ClN4      | 262.738  | VUF 10166              |  |  |
| Selleck   |       |                                                                                                                                                                                                                                                |                 |          |                        |  |  |
| Chemicals | S3100 | N1C=CC(=O)NC1=S                                                                                                                                                                                                                                | C4H4N2OS        | 128.152  | 2-Thiouracil           |  |  |
| Selleck   |       | N1(C(N2CC(=O)NCC2)=O)C(c3ccc(OC)cc3OC(C)C)=NC(c4ccc(Cl)cc4)C1c5ccc(Cl)cc5                                                                                                                                                                      | C30H30Cl2N4O4   | 581.49   | Nutlin-3               |  |  |
| Chemicals | S1061 |                                                                                                                                                                                                                                                |                 |          |                        |  |  |
| Selleck   |       |                                                                                                                                                                                                                                                |                 |          |                        |  |  |
| Chemicals | S1897 | [K+].[I-]                                                                                                                                                                                                                                      | IK              | 166.003  | Potassium Iodide       |  |  |
| Selleck   |       | c1c(OC)c2c(C(=O)c3c(c(O)c4c(C[C@@](O)(C(=O)CO)C[C@H]4O[C@]5([H])O[C@@H](C)[C@H](O)[C@@H](N)C5)c3O)C2=O)cc1.Cl                                                                                                                                  | C27H30ClNO11    | 579.98   | Epirubicin HCl         |  |  |
| Chemicals | S1223 |                                                                                                                                                                                                                                                |                 |          |                        |  |  |
| Selleck   |       |                                                                                                                                                                                                                                                |                 |          |                        |  |  |
| Chemicals | S1960 | c1cc2c(OC3c(cc(C(C)C(=O)O)cc3)C2)nc1                                                                                                                                                                                                           | C15H13NO3       | 255.269  | Pranoprofen            |  |  |
| Selleck   |       |                                                                                                                                                                                                                                                |                 |          |                        |  |  |
| Chemicals | S1305 | N(C(=S)c1c(nc[nH]1)N2)=C2                                                                                                                                                                                                                      | C5H4N4S         | 152.177  | Mercaptopurine (6-MP)  |  |  |
| Selleck   |       |                                                                                                                                                                                                                                                |                 |          |                        |  |  |
| Chemicals | S2025 | N1(C)C(=O)C=C(NCCCN2CCN(c3c(OC)ccccc3)CC2)N(C)C1=O.Cl                                                                                                                                                                                          | C20H30ClN5O3    | 423.937  | Urapidil HCl           |  |  |
| Selleck   |       |                                                                                                                                                                                                                                                |                 |          |                        |  |  |
| Chemicals | S1357 | c1c(C)c(NC(=O)CN(CC)CC)c(C)cc1                                                                                                                                                                                                                 | C14H22N2O       | 234.337  | Lidocaine              |  |  |
| Selleck   |       |                                                                                                                                                                                                                                                |                 |          |                        |  |  |
| Chemicals | S2080 | CCCC(=O)OCOC(=O)C(C(c1c(Cl)c(Cl)ccc1)C(C(=O)OC)=C(C)N2)=C2C                                                                                                                                                                                    | C21H23Cl2NO6    | 456.316  | Clevidipine Butyrate   |  |  |
| Selleck   |       |                                                                                                                                                                                                                                                |                 |          |                        |  |  |
| Chemicals | S1436 | c(cccc1)(N(C)S(=O)(=O)c2c(ccc(Cl)c2)C3NCCCCC([O-])=O)c13.[Na+]                                                                                                                                                                                 | C21H24ClN2NaO4S | 458.934  | Tianeptine sodium      |  |  |
| Selleck   |       |                                                                                                                                                                                                                                                |                 |          |                        |  |  |
| Chemicals | S2104 | c1c(S(=O)(N)=O)cc(C(NC[C@@H]2CCCC2CC)=O)c(OC)c1                                                                                                                                                                                                | C15H23N3O4S     | 341.426  | Levosulpiride          |  |  |
| Selleck   |       |                                                                                                                                                                                                                                                |                 |          |                        |  |  |
| Chemicals | S1608 | c1[n+](C)cccc1OC(=O)N(C)C.[Br-]                                                                                                                                                                                                                | C9H13BrN2O2     | 261.116  | Pyridostigmine Bromide |  |  |
| Selleck   |       |                                                                                                                                                                                                                                                |                 |          |                        |  |  |
| Chemicals | S2168 | c1(O)cc2c(OC[C@@]3([H])[C@]2([H])OCCN3CCC)cc1                                                                                                                                                                                                  | C14H19NO3       | 249.306  | PD128907 HCl           |  |  |
| Selleck   |       |                                                                                                                                                                                                                                                |                 |          |                        |  |  |
| Chemicals | S1654 | N1(c2ccccc2)C(=O)C(CCCC)C(=O)N1c3ccccc3                                                                                                                                                                                                        | C19H20N2O2      | 308.374  | Phenylbutazone         |  |  |
| Selleck   |       | c1ccccc1[C@H](c2cc(CO)ccc2OC(=O)C(C)C)CCN(C(C)C)C(C)C.C(C(=O)O)=CC(=O)O                                                                                                                                                                        | C30H41NO7       | 527.649  | Fesoterodine Fumarate  |  |  |
| Chemicals | S2240 |                                                                                                                                                                                                                                                |                 |          |                        |  |  |
| Selleck   |       | C1[C@@]2([H])C(CC[C@@]3([H])[C@@]2([H])CC[C@@]4(CC)[C@@]3([H])CC[C@@]4(C#C)O)=CC1=O                                                                                                                                                            | C21H28O2        | 312.446  | Levonorgestrel         |  |  |
| Chemicals | S1727 |                                                                                                                                                                                                                                                |                 |          |                        |  |  |
| Selleck   |       | C1[C@@]2(C)[C@@]([H])(CC[C@]3(C)[C@@]2([H])C[C@H](O)[C@@]4([H])[C@@]3(C)CC[C@H]4[C@@](CCC=C(C)C)(CO[C@H]5[C@@H](O)[C@@H](O)[C@H](O)[C@@H](CO[C@H]6[C@@H](O)[C@H]7C[C@H](O)[C@H](O)[C@H](O)[C@@H](CO)O7                                         | C47H80O17       | 917.128  | Gynostemma Extract     |  |  |
| Chemicals | S2306 |                                                                                                                                                                                                                                                |                 |          |                        |  |  |
| Selleck   |       |                                                                                                                                                                                                                                                |                 |          |                        |  |  |
| Chemicals | S1782 | [C@H]1(O)[C@H](O)[C@H](N2C=NC(N)=NC2=O)O[C@@H]1CO                                                                                                                                                                                              | C8H12N4O5       | 244.205  | Azaciditine            |  |  |
| Selleck   |       |                                                                                                                                                                                                                                                |                 |          |                        |  |  |
| Chemicals | S2333 | c1(OC)c(OC)c2c(C(=O)C=C(c3ccc(OC)c(OC)c3)O2)c(OC)c1OC                                                                                                                                                                                          | C21H22O8        | 402.395  | Nobiletin              |  |  |
| Selleck   |       |                                                                                                                                                                                                                                                |                 |          |                        |  |  |
| Chemicals | S1854 | c1cc(C(n2ccnc2)c3ccc(c4ccccc4)cc3)ccc1                                                                                                                                                                                                         | C22H18N2        | 310.392  | Bifonazole             |  |  |

|           |       |                                                                                                                                                                             |                  |          |                                                       |
|-----------|-------|-----------------------------------------------------------------------------------------------------------------------------------------------------------------------------|------------------|----------|-------------------------------------------------------|
| Selleck   |       |                                                                                                                                                                             |                  |          |                                                       |
| Chemicals | S2372 | <chem>c1cc2c(Oc3c(cccc3)C2=O)cc1</chem>                                                                                                                                     | C13H8O2          | 196.201  | Xanthone                                              |
| Selleck   |       |                                                                                                                                                                             |                  |          |                                                       |
| Chemicals | S2425 | <chem>c1(OC)c(O)ccc(C(=O)C)c1</chem>                                                                                                                                        | C9H10O3          | 166.174  | Apocynin                                              |
| Selleck   |       |                                                                                                                                                                             |                  |          |                                                       |
| Chemicals | S2876 | <chem>[C@]1(C)(N[C@]2([H])c3c1cccc3)c4c(cccc4)C2.C(C(=O)O)=CC(=O)O</chem>                                                                                                   | C20H19NO4        | 337.369  | (-)-MK 801 Maleate                                    |
| Selleck   |       |                                                                                                                                                                             |                  |          |                                                       |
| Chemicals | S2516 | <chem>c1c(C)c(NC2=NCCCS2)c(C)cc1.Cl</chem>                                                                                                                                  | C12H17ClN2S      | 256.795  | Xylazine HCl                                          |
| Selleck   |       |                                                                                                                                                                             |                  |          |                                                       |
| Chemicals | S2894 | <chem>c1c(S(=O)(=O)c2cc(c3nc2)cccc3N4CCNCC4)cccc1</chem>                                                                                                                    | C19H19N3O2S      | 353.438  | SB742457                                              |
| Selleck   |       |                                                                                                                                                                             |                  |          |                                                       |
| Chemicals | S2551 | <chem>C1(=O)N2[C@]([H])(S(=O)(=O)C(C)(C)[C@]2(C(=O)[O-])[H])C1.[Na+]</chem>                                                                                                 | C8H10NNaO5S      | 255.223  | Sulbactam sodium                                      |
| Selleck   |       |                                                                                                                                                                             |                  |          |                                                       |
| Chemicals | S2903 | <chem>c1c(Cl)c(Nc2c(CC(=O)O)cc(C)cc2)c(F)cc1</chem>                                                                                                                         | C15H13ClFNO2     | 293.721  | Lumiracoxib                                           |
| Selleck   |       |                                                                                                                                                                             |                  |          |                                                       |
| Chemicals | S2625 | <chem>c1(OC)cc(Nc2nc(Nc3nc4c(O C(C)(C)C(=O)N4COP(=O)(O)O)cc3)c(F)cn2)c c(OC)c1OC</chem>                                                                                     | C23H26FN6O9P     | 580.46   | Fostamatinib (R788)                                   |
| Selleck   |       |                                                                                                                                                                             |                  |          |                                                       |
| Chemicals | S2913 | <chem>c1(ccc(C)cc1)S(=O)(=O)C=CC#N</chem>                                                                                                                                   | C10H9NO2S        | 207.249  | BAY 11-7082                                           |
| Selleck   |       |                                                                                                                                                                             |                  |          |                                                       |
| Chemicals | S2698 | <chem>c1c(c2nc(N)nc(C(C)C)c2)c3c(cccc3)c(F)c1</chem>                                                                                                                        | C17H16FN3        | 281.327  | RS-127445                                             |
| Selleck   |       |                                                                                                                                                                             |                  |          |                                                       |
| Chemicals | S2923 | <chem>c1(nccc2)c2cccc1NC(=S)NC(C(Cl)(Cl)Cl)NC(=O)C=Cc3cccc3</chem>                                                                                                          | C21H17Cl3N4OS    | 479.81   | Salubrial                                             |
| Selleck   |       |                                                                                                                                                                             |                  |          |                                                       |
| Chemicals | S2812 | <chem>c1(O)c(c2cc(C)c1c3c(C)cc(c4c3O)c(C(C)C)c(O)c(O)c4C=O)c(C=O)c(O)c(O)c2C(C)C.C(O)(=O)C</chem>                                                                           | C32H34O10        | 578.606  | AT101                                                 |
| Selleck   |       |                                                                                                                                                                             |                  |          |                                                       |
| Chemicals | S3033 | <chem>C1CC[C@H](C#N)N1C(=O)CNC2(CC(O)(CC3C2)CC4C3)C4</chem>                                                                                                                 | C17H25N3O2       | 303.399  | Vildagliptin (LAF-237)                                |
| Selleck   |       |                                                                                                                                                                             |                  |          |                                                       |
| Chemicals | S2824 | <chem>c1(NC(N)=O)sc(c2ccc(F)cc2)cc1C(N)=O</chem>                                                                                                                            | C12H10FN3O2S     | 279.29   | TPCA-1                                                |
| Selleck   |       |                                                                                                                                                                             |                  |          |                                                       |
| Chemicals | S3045 | <chem>N1(CC(N2CCCC2)=O)CCN(C(=O)C=Cc3cc(OC)c(O C)c(OC)c3)CC1.C(=O)(O)C=CC(=O)O</chem>                                                                                       | C26H35N3O9       | 533.571  | Cinepazide maleate                                    |
| Selleck   |       |                                                                                                                                                                             |                  |          |                                                       |
| Chemicals | S2847 | <chem>n1(C)c(C(N[C@@H](Cc2cccc(Cl)c2)C(NCC#N)=O)=O)cc(C(C)C)C)n1</chem>                                                                                                     | C20H24ClN5O2     | 401.89   | Cathepsin Inhibitor 1                                 |
| Selleck   |       |                                                                                                                                                                             |                  |          |                                                       |
| Chemicals | S3057 | <chem>c1(OCC)n(Cc2ccc(c3cccc3C4=NC(=O)ON4)cc2)c5c(cccc5C(OC)C6=C(C)OC(=O)O6)=O)n1</chem>                                                                                    | C30H24N4O8       | 568.534  | Azilsartan Medoxomil                                  |
| Selleck   |       |                                                                                                                                                                             |                  |          |                                                       |
| Chemicals | S2858 | <chem>c1(O)ccc(CCNc2c(c3nc(c4csc5c4cccc5)n2)ncn3C(C)C)cc1</chem>                                                                                                            | C24H23N5OS       | 429.537  | StemRegenin 1 (SR1)                                   |
| Selleck   |       |                                                                                                                                                                             |                  |          |                                                       |
| Chemicals | S3075 | <chem>c1ccc(C)c(C)c1[C@H](C)c2cnc[nH]2</chem>                                                                                                                               | C13H16N2         | 200.28   | Dexmedetomidine                                       |
| Selleck   |       |                                                                                                                                                                             |                  |          |                                                       |
| Chemicals | S2866 | <chem>N(c1ccc(F)cc1)C(=O)Nc2ccc(S(=O)(=O)N)cc2</chem>                                                                                                                       | C13H12FN3O3S     | 309.316  | U-104                                                 |
| Selleck   |       |                                                                                                                                                                             |                  |          |                                                       |
| Chemicals | S3104 | <chem>c1cccc(OC)c1OCC2SCCN2C(CC(=O)OCC)=O</chem>                                                                                                                            | C16H21NO5S       | 339.407  | Moguisteine                                           |
| Selleck   |       |                                                                                                                                                                             |                  |          |                                                       |
| Chemicals | S1121 | <chem>c1c(C(C)(C)C)c(S(=O)(=O)c2ccc(NC(=O)C3cc(C4c(C)C)cccc4)c(O)c(O)c3O)cc2)ccc1</chem>                                                                                    | C33H35NO6S       | 573.699  | TW-37                                                 |
| Selleck   |       |                                                                                                                                                                             |                  |          |                                                       |
| Chemicals | S1905 | <chem>N1C(C)=C(C(OC)=O)C(c2ccccc2Cl)C(C(=O)OCC)=C1COCCN</chem>                                                                                                              | C20H25ClN2O5     | 408.876  | Amlodipine                                            |
| Selleck   |       |                                                                                                                                                                             |                  |          |                                                       |
| Chemicals | S1228 | <chem>c1cc2c(C(=O)C3c(c(O)c4c(C[C@@](O)(C(=O)C)C[C@H]4O[C@H]5C[C@H](N)[C@H](O)[C@H](C)O5)c3O)C2=O)cc1.Cl</chem>                                                             | C26H28ClNO9      | 533.955  | Idarubicin HCl                                        |
| Selleck   |       |                                                                                                                                                                             |                  |          |                                                       |
| Chemicals | S1972 | <chem>c1(OCCN(C)C)ccc(C(c2ccccc2)=C(c3ccccc3)CC)cc1.C(O)(=O)CC(O)(C(O)=O)CC(O)=O</chem>                                                                                     | C32H37NO8        | 563.638  | Tamoxifen Citrate                                     |
| Selleck   |       |                                                                                                                                                                             |                  |          |                                                       |
| Chemicals | S1319 | <chem>C1C=C(C)CC[C@H]2[C@H](OC(=O)C2=C)C=C(C)C1</chem>                                                                                                                      | C15H20O2         | 232.318  | Costunolide                                           |
| Selleck   |       |                                                                                                                                                                             |                  |          |                                                       |
| Chemicals | S2037 | <chem>C1CC(O C(=O)O C(C)O C(c2c3c(nc(OCC)n3Cc4ccc(c5cccc5c6[nH]nnn6)cc4)ccc2)=O)CCC1</chem>                                                                                 | C33H34N6O6       | 610.66   | Candesartan Cilexetil<br>Losartan Potassium (DuP 753) |
| Selleck   |       |                                                                                                                                                                             |                  |          |                                                       |
| Chemicals | S1359 | <chem>c1c(c2cccc2c3nn[nH]3)ccc(Cn4c(CCCC)nc(Cl)c4CO)c1.[K]</chem>                                                                                                           | C22H23ClKN6O     | 462.009  |                                                       |
| Selleck   |       |                                                                                                                                                                             |                  |          |                                                       |
| Chemicals | S2081 | <chem>c1ccc(CC[C@H](C(OC)C)=O)N[C@H]2C(=O)N3N(CCC[C@H]3C(=O)O)CCC2)cc1.O</chem>                                                                                             | C22H33N3O6       | 435.514  | Cilazapril Monohydrate                                |
| Selleck   |       |                                                                                                                                                                             |                  |          |                                                       |
| Chemicals | S1468 | <chem>C1C(=CC=C2CC[C@]3(C)[C@@]2([H])C[C@H]3[C@H](C)CCCC(C)C)C(=C)[C@H]1(O)C[C@H]1O</chem>                                                                                  | C27H44O2         | 400.637  | Alfacalcidol                                          |
| Selleck   |       |                                                                                                                                                                             |                  |          |                                                       |
| Chemicals | S2108 | <chem>c1(Nc2ccc(C(F)(F)F)c2)ncccc1C(O)=O.N(C)C[C@H]([C@H]([C@@H]([C@@H](CO)O)O)O)O</chem>                                                                                   | C21H28F3N3O7     | 491.458  | Flunixin Meglumine                                    |
| Selleck   |       |                                                                                                                                                                             |                  |          |                                                       |
| Chemicals | S1609 | <chem>N1C(=S)N(C)C=C1</chem>                                                                                                                                                | C4H6N2S          | 114.169  | Methimazole                                           |
| Selleck   |       |                                                                                                                                                                             |                  |          |                                                       |
| Chemicals | S2169 | <chem>[Ca+2].n1c(C(C)C)c(C=C[C@H](C[C@@H](O)CC(=O)[O-])O)c(c2ccc(F)cc2)nc1N(C)S(=O)(=O)C.n3c(C(C)C)c(C=C[C@H](C[C@@H](O)CC(=O)[O-])O)c(c4ccc(F)cc4)nc3N(C)S(=O)(=O)C</chem> | C44H54CaF2N6O12S | 1001.137 | Rosuvastatin Calcium                                  |

|                      |       |                                                                                                                                                                                                                                                                                    |                  |          |                                 |
|----------------------|-------|------------------------------------------------------------------------------------------------------------------------------------------------------------------------------------------------------------------------------------------------------------------------------------|------------------|----------|---------------------------------|
| Selleck<br>Chemicals | S1657 | <chem>c1cc(Cc1C@H)(N[C@@H](C)C(=O)N2CCC[C@H]2C(O)=O)C(=O)O)ccc1.O.O</chem>                                                                                                                                                                                                         | C18H28N2O7       | 384.424  | Enalaprilat Dihydrate           |
| Selleck<br>Chemicals | S2250 | <chem>c1(O)cc(C(=O)O)[C@@H]2Cc3c(cc(O)cc3O)O[C@@H]2c4cc(O)c(O)c(O)c4)cc(O)c1O</chem>                                                                                                                                                                                               | C22H18O11        | 458.372  | (-)-Epigallocatechin Gallate    |
| Selleck<br>Chemicals | S1740 | <chem>c1ccc(OC(C(O)CO)c(OC)c1</chem>                                                                                                                                                                                                                                               | C10H14O4         | 198.216  | Guaifenesin                     |
| Selleck<br>Chemicals | S2313 | <chem>c1c2c([nH]cc2CO)ccc1</chem>                                                                                                                                                                                                                                                  | C9H9NO           | 147.174  | Indole-3-carbinol               |
| Selleck<br>Chemicals | S1801 | <chem>N(C)(C)Cc1cc(CSCCNC(NC)=C[N+](O-)=O)cc1.Cl</chem>                                                                                                                                                                                                                            | C13H23ClN4O3S    | 350.865  | Ranitidine                      |
| Selleck<br>Chemicals | S2336 | <chem>C(C(=O)NC(=O)N1)=C1C(=O)O[C@@H](O)([C@@H](O)C(=O)O)C(=O)O.O.c1cc(OC(C(O)CNC(C)C)ccc1C</chem>                                                                                                                                                                                 | C5H4N2O4         | 156.096  | Orotic acid (6-Carboxyuracil)   |
| Selleck<br>Chemicals | S1856 | <chem>CO.C.c2cc(OC(C(O)CNC(C)C)ccc2CCOC[C@@]1(C(=O)O)(C)C[C@]2([H])([C@@](C)(CC[C@]3(C)C2=CC(=O)[C@@]4([H])(C@@]3(C)CC[C@]5([H])(C@@]4(C)CC[C@H](O)[C@@]6([H])(C@@]@H)(O)[C@]7([H])O[C@H](C(=O)=O)[C@@H](O)[C@H](O)[C@H]7O)[C@@]@H)(O)[C@H](O)[C@@H](C(=O)O)O6)C5(C)C)CC1.N</chem> | C34H56N2O12      | 684.815  | Metoprolol Tartrate             |
| Selleck<br>Chemicals | S2376 | <chem>C42H65NO16</chem>                                                                                                                                                                                                                                                            |                  | 839.963  | Ammonium Glycyrhizinate         |
| Selleck<br>Chemicals | S2439 | <chem>c1(N=C(N)NC2=O)c2ncn1[C@H]3[C@H](O)[C@H](O)[C@H](CO)O3</chem>                                                                                                                                                                                                                | C10H13N5O5       | 283.241  | Guanosine                       |
| Selleck<br>Chemicals | S2882 | <chem>c1(C1N2CCC(N3CCCC3)CC2)=O)ccc(Nc4nccc(c5sc6c(cccc6)c5)n4)cc1</chem>                                                                                                                                                                                                          | C28H29N5OS       | 483.628  | IKK-16 (IKK Inhibitor VII)      |
| Selleck<br>Chemicals | S2519 | <chem>c1(cccc2)c2c(CC(NCC3)=N3)ccc1.Cl</chem>                                                                                                                                                                                                                                      | C14H15ClN2       | 246.735  | Naphazoline HCl                 |
| Selleck<br>Chemicals | S2895 | <chem>c1(C(C)(C)C)cc(C=C(C#N)C#N)cc(C(C)(C)C)c1O</chem>                                                                                                                                                                                                                            | C18H22N2O        | 282.38   | Tyrphostin 9                    |
| Selleck<br>Chemicals | S2553 | <chem>NCC(=O)CCC(=O)O.O.Cl</chem>                                                                                                                                                                                                                                                  | C5H10ClNO3       | 167.591  | 5-Aminolevulinic acid HCl       |
| Selleck<br>Chemicals | S2904 | <chem>c1c2c(c3C=NNC2=O)c([nH]c3c4cn(C)nc4)cc1NC(=O)[C@H](N)C5CCCCC5</chem>                                                                                                                                                                                                         | C22H25N7O2       | 419.48   | PF-477736                       |
| Selleck<br>Chemicals | S2637 | <chem>c1ccc(COc2cc3c([C@H](CC(O)=O)CO3)cc2)cc1c4c(C)cc(OC(CS(=O)O)(C)=O)cc4C.O.c5ccc(COc6cc7c([C@H](CC(O)=O)CO7)cc6)cc5c8c(C)cc(OC(CS(=O)O)(C)=O)cc8C</chem>                                                                                                                       | C58H66O15S2      | 1067.266 | TAK-875                         |
| Selleck<br>Chemicals | S2914 | <chem>n1c(Nc2c(C)cc(C)cc2C)ccnc1Nc3ccc(C#N)cc3</chem>                                                                                                                                                                                                                              | C20H19N5         | 329.398  | Dapivirine (TMC120)             |
| Selleck<br>Chemicals | S2721 | <chem>C1(C)=C(C(O(C(C)C)=O)C)c2cc([N+](O-))=O)ccc2C(C(=O)O)C=C(C#N)N1</chem>                                                                                                                                                                                                       | C19H19N3O6       | 385.371  | Nilvadipine                     |
| Selleck<br>Chemicals | S2925 | <chem>c1(C(F)(F)F)cc(CN(c2nn(C)nn2)[C@]3([H])c4c(c(C)cc(C)c4)N(C[C@]5([H])CC[C@]6([H])(C(=O)O)CC5)CCC3)cc(C(F)(F)F)c1</chem>                                                                                                                                                       | C31H36F6N6O2     | 638.647  | Evacetrapib (LY2484595)         |
| Selleck<br>Chemicals | S2813 | <chem>C(C1CC1)(c2ccc(OC(Cc3[nH]cn3)cc2)=O.O)(C(=O)C=CC(O)=O</chem>                                                                                                                                                                                                                 | C20H22N2O6       | 386.398  | Ciproxifan                      |
| Selleck<br>Chemicals | S3034 | <chem>c1(C(Cc2c(C)cc(c3c2)OCO3)=O)sccc1S([N-]c4onc(C)c4Cl)(=O)=O.[Na+]</chem>                                                                                                                                                                                                      | C18H14ClN2NaO6S2 | 476.886  | Sitaxentan sodium               |
| Selleck<br>Chemicals | S2825 | <chem>c1ccc2c(cccc2CNc3ccc(OC)cc3)c1.Cl</chem>                                                                                                                                                                                                                                     | C19H20ClNO       | 313.821  | ML133 HCl                       |
| Selleck<br>Chemicals | S3046 | <chem>c1(OC)n(Cc2ccc(c3ccccc3C4=NC(=O)ON4)cc2)c5c(cccc5C(O)=O)n1</chem>                                                                                                                                                                                                            | C25H20N4O5       | 456.45   | Azilsartan                      |
| Selleck<br>Chemicals | S2849 | <chem>N1(S(c2cccc(O)c2)(=O)=O)CCC[C@@H]1CCN3CCC(C)CC3.Cl</chem>                                                                                                                                                                                                                    | C18H29ClN2O3S    | 388.952  | SB269970 HCl                    |
| Selleck<br>Chemicals | S3060 | <chem>c1(C(C)c2c([nH]cn2)cccc(C)c1C.Cl</chem>                                                                                                                                                                                                                                      | C13H17ClN2       | 236.74   | Medetomidine HCl                |
| Selleck<br>Chemicals | S2859 | <chem>c1c(F)c(NC(=O)C2(CC2)C(=O)Nc3ccc(F)cc3)ccc1Oc4ccnc(NC(=O)N5CCC(N6CCN(C)CC6)CC5)c4</chem>                                                                                                                                                                                     | C33H37F2N7O4     | 633.688  | Golvatinib (E7050)              |
| Selleck<br>Chemicals | S3076 | <chem>P(=O)([O-])([O-])C([O-])=O.[Na+].[Na+].[Na+]</chem>                                                                                                                                                                                                                          | ClNa3O5P         | 191.951  | Foscarnet Sodium                |
| Selleck<br>Chemicals | S2867 | <chem>n1c(c2c(Nc3ccc(O)c(Br)c3)nc1)cc(OC)c(OC)c2</chem>                                                                                                                                                                                                                            | C16H14BrN3O3     | 376.205  | WHI-P154                        |
| Selleck<br>Chemicals | S3105 | <chem>c1(cc(F)c2N3CCC(O)CC3)c(N4C=C(C(O)=O)C1=O)c2CCC4C</chem>                                                                                                                                                                                                                     | C19H21FN2O4      | 360.379  | Nadifloxacin                    |
| Selleck<br>Chemicals | S1138 | <chem>c([nH]c(C)c1)(ccc(Oc2c3n(cc(O[C@H](O(C(=O)[C@H](C)N)C)c3C)ncn2)c4F)c14</chem>                                                                                                                                                                                                | C22H24FN5O4      | 441.455  | Brivanib Alaninate (BMS-582664) |
| Selleck<br>Chemicals | S1913 | <chem>c1cc(C(C(N(Cc2ccnc2)CC)=O)CO)ccc1</chem>                                                                                                                                                                                                                                     | C17H20N2O2       | 284.353  | Tropicamide                     |
| Selleck<br>Chemicals | S1235 | <chem>c1c(C(c2ccc(C#N)cc2)n3cncn3)ccc(C#N)c1</chem>                                                                                                                                                                                                                                | C17H11N5         | 285.303  | Letrozole                       |
| Selleck<br>Chemicals | S1973 | <chem>C(N1C(O[C@H]2[C@H]1O[C@H](CO)[C@@H]2O)=NC3=N=C3.Cl</chem>                                                                                                                                                                                                                    | C9H12ClN3O4      | 261.662  | Cyclocytidine HCl               |

|           |       |                                                                                                                                                                            |                |         |                                          |
|-----------|-------|----------------------------------------------------------------------------------------------------------------------------------------------------------------------------|----------------|---------|------------------------------------------|
| Selleck   |       | <chem>C1=C[C@@]2(C)C(C)[C@]3([H])[C@@]2(F)[C@H](O)C[C@@]4(C)[C@@]3([H])[C@H](C)[C@@]4(O)C(CO)=O)=CC1=O</chem>                                                              | C22H29FO5      | 392.461 | Dexamethasone (DHAP)                     |
| Chemicals | S1322 |                                                                                                                                                                            |                |         |                                          |
| Selleck   |       |                                                                                                                                                                            |                |         |                                          |
| Chemicals | S2041 | <chem>c1cc(C(=O)CCN2CCCCC2)ccc1OCCCC.Cl</chem>                                                                                                                             | C18H28ClNO2    | 325.873 | Dyclonine HCl                            |
| Selleck   |       |                                                                                                                                                                            |                |         |                                          |
| Chemicals | S1362 | <chem>c1(C=CS(=O)(=O)Cc2cc(NCC(=O)[O-])c(OC)cc2)c(OC)cc(OC)cc1O.[Na+]</chem>                                                                                               | C21H24NNaO8S   | 473.472 | Rigosertib (ON-01910)                    |
| Selleck   |       |                                                                                                                                                                            |                |         |                                          |
| Chemicals | S2082 | <chem>C(=O)(OCCN(CC)CC)C(c1cccc1)c2cccc2.Cl</chem>                                                                                                                         | C20H26ClNO2    | 347.879 | Adiphenine HCl                           |
| Selleck   |       |                                                                                                                                                                            |                |         |                                          |
| Chemicals | S1469 | <chem>C1C(=CC=C2CC[C@]3(C)[C@@]2([H])CC[C@]3([H])[C@H](C)CCC(C(O)(C)C)C(=C)CC[C@H]1O</chem>                                                                                | C27H44O2       | 400.637 | Calcifediol                              |
| Selleck   |       |                                                                                                                                                                            |                |         |                                          |
| Chemicals | S2109 | <chem>CCO[C](C@H)(CCc1cccc1)N[C@@H](C)C(=O)N2[C@@H](C(O)=O)CN(C)C2=O=O</chem>                                                                                              | C20H27N3O6     | 405.445 | Imidapril HCl                            |
| Selleck   |       |                                                                                                                                                                            |                |         |                                          |
| Chemicals | S1611 | <chem>C1(CSc2n(C)mn2)=C(C(O)=O)N3[C@@]([H])([C@H](NC([C@H](NC(=O)N4CCN(CC)C(=O)C4=O)c5ccc(O)cc5)=O)C3=O)SC1</chem>                                                         | C25H27N9O8S2   | 645.667 | Cefoperazone                             |
| Selleck   |       |                                                                                                                                                                            |                |         |                                          |
| Chemicals | S2173 | <chem>c1cc(c2nc(N)nc(O[C@@H](C(F)(F)F)c3c(n4ccc(C)n4)cc(Cl)cc3)c2)ccc1C[C@H](N)C(=O)OCC.c5cc(C(=O)NCC(=O)O)ccc5</chem>                                                     | C36H35ClF3N7O6 | 754.155 | Telotristat Etiprate (LX 1606 Hippurate) |
| Selleck   |       |                                                                                                                                                                            |                |         |                                          |
| Chemicals | S1675 | <chem>C1(=O)[C@@H](CCCCC(=O)O)[C@@H](CCC(=O)C(F)(F)CCCC)[C@H](O)C1</chem>                                                                                                  | C20H32F2O5     | 390.462 | Lubiprostone                             |
| Selleck   |       |                                                                                                                                                                            |                |         |                                          |
| Chemicals | S2258 | <chem>c1(O)cc2c(C=CC(=O)O2)cc1O[C@H]3[C@@H](O)[C@H](O)[C@H](O)[C@@H](CO)O3</chem>                                                                                          | C15H16O9       | 340.282 | Esculin                                  |
| Selleck   |       |                                                                                                                                                                            |                |         |                                          |
| Chemicals | S1748 | <chem>C(C)(NC(C)=C(C(=O)OC)C1c2c([N+])([O-])=O)cccc2)=C1C(=O)OCC(C)C</chem>                                                                                                | C20H24N2O6     | 388.414 | Nisoldipine                              |
| Selleck   |       |                                                                                                                                                                            |                |         |                                          |
| Chemicals | S2316 | <chem>c(nc[nH]1)(ncnc2NCc3ccc3)c12</chem>                                                                                                                                  | C10H9N5O       | 215.211 | Kinetin                                  |
| Selleck   |       |                                                                                                                                                                            |                |         |                                          |
| Chemicals | S1805 | <chem>CC(=O)OCC([N+](C)(C)C.[Cl-])C(c1ccc(O)c(O)c1)(Oc2c(c(O)cc(O)c2)C3=O)=C3O[C@H]4[C@@H](O)[C@@H](O)[C@H](O)[C@@H](CO[C@H]5[C@@H](O)[C@H](O)[C@@H](O)[C@H](CO5)O4</chem> | C7H16ClNO2     | 181.66  | Acetylcholine Chloride                   |
| Selleck   |       |                                                                                                                                                                            |                |         |                                          |
| Chemicals | S2350 | <chem>c1(cccc2c2S[C@@H](c3ccc(OC)cc3)[C@@H](OC(=O)C)C(=O)N1CCN(C)C.Cl</chem>                                                                                               | C27H30O16      | 610.518 | Rutin                                    |
| Selleck   |       |                                                                                                                                                                            |                |         |                                          |
| Chemicals | S1865 |                                                                                                                                                                            | C22H27ClN2O4S  | 450.979 | Diltiazem HCl                            |
| Selleck   |       |                                                                                                                                                                            |                |         |                                          |
| Chemicals | S2383 | <chem>[C@@H]1(O)[C@H](CO)O[C@@H](Oc2ccc(CO)cc2)[C@H](O)[C@H]1O</chem>                                                                                                      | C13H18O7       | 286.278 | Gastrodin                                |
| Selleck   |       |                                                                                                                                                                            |                |         |                                          |
| Chemicals | S2442 | <chem>O1[C@H](n2cnc3c2N=CNC3=O)[C@H](O)[C@H](O)[C@H]1CO</chem>                                                                                                             | C10H12N4O5     | 268.226 | Inosine                                  |
| Selleck   |       |                                                                                                                                                                            |                |         |                                          |
| Chemicals | S2883 | <chem>C(O)(=O)CNC(c1ccc(N)cc1)=O</chem>                                                                                                                                    | C9H10N2O3      | 194.187 | 4-Aminhippuric Acid                      |
| Selleck   |       |                                                                                                                                                                            |                |         |                                          |
| Chemicals | S2521 | <chem>c1(O)cc([C@H](CNC)O)ccc1O.C(O)(=O)[C@@H]([C@H](C(O)=O)O)O</chem>                                                                                                     | C13H19NO9      | 333.291 | Epinephrine Bitartrate                   |
| Selleck   |       |                                                                                                                                                                            |                |         |                                          |
| Chemicals | S2896 | <chem>c1(O)cc(Nc2c(c3ncn2)ccc(OCc4ccccc4)c3)c(F)cc1C.Cl</chem>                                                                                                             | C22H19ClFN3O2  | 411.857 | ZM 323881 HCl                            |
| Selleck   |       |                                                                                                                                                                            |                |         |                                          |
| Chemicals | S2573 | <chem>c1cc(C(=O)OCCN(C)C)ccc1NCCCC.Cl</chem>                                                                                                                               | C15H25ClN2O2   | 300.824 | Tetracaine HCl                           |
| Selleck   |       |                                                                                                                                                                            |                |         |                                          |
| Chemicals | S2905 | <chem>c1(Cl)cc2c([nH]c(C(=O)N3CCN(C)CC3)c2)cc1</chem>                                                                                                                      | C14H16ClN3O    | 277.749 | JNJ-7777120                              |
| Selleck   |       |                                                                                                                                                                            |                |         |                                          |
| Chemicals | S2662 | <chem>c1ccc(CNC(=O)N2CCC(=O)N3[C@]2([H])CN(Cc4c5c(cccc5)ccc4)C(=O)[C@H]3Cc6ccc(O)cc6)cc1</chem>                                                                            | C33H32N4O4     | 548.632 | ICG-001                                  |
| Selleck   |       |                                                                                                                                                                            |                |         |                                          |
| Chemicals | S2915 | <chem>c1(C(=O)Nc2ccccc2)c(Cl)ccc([N+])([O-])=O)c1</chem>                                                                                                                   | C13H9ClN2O3    | 276.675 | GW9662                                   |
| Selleck   |       |                                                                                                                                                                            |                |         |                                          |
| Chemicals | S2769 | <chem>N1c(c2C(N)=C(c3[nH]c4c(ccc(N5CCN(C)CC5)c4)n3)C1=O)cccc2F.CC(O)C(=O)O.CC(O)C(=O)O</chem>                                                                              | C27H33FN6O7    | 572.585 | Dolactac Acid                            |
| Selleck   |       |                                                                                                                                                                            |                |         |                                          |
| Chemicals | S2927 | <chem>c(C(=O)C(=O)N1Cc2ccc(Cl)c(Cl)c2)(cccc3)c13</chem>                                                                                                                    | C15H9Cl2NO2    | 306.143 | Apoptosis Activator 2                    |
| Selleck   |       |                                                                                                                                                                            |                |         |                                          |
| Chemicals | S2816 | <chem>C(=S)(N)C(C#N)=Cc1cc(C(C)(C)C)c(O)c(C(C)(C)C)c1</chem>                                                                                                               | C18H24N2OS     | 316.461 | Tyrphostin AG 879                        |
| Selleck   |       |                                                                                                                                                                            |                |         |                                          |
| Chemicals | S3035 | <chem>c1c(OC)C2c(C(=O)Cc3c(c(O)c4c(C[C@@]([C](=O)C)(O)C[C@H]4O[C@]5([H])O[C@@H](C)[C@@H](O)[C@@H](N(C)C5)c3O)C2=O)cc1.Cl</chem>                                            | C27H30ClNO10   | 563.981 | Daunorubicin HCl                         |
| Selleck   |       |                                                                                                                                                                            |                |         |                                          |
| Chemicals | S2828 | <chem>N1(c2snc(c3ccccc3)n2)CCN(C(Nc4ccccc4)=O)CC1</chem>                                                                                                                   | C19H19N5OS     | 365.452 | JNJ-1661010                              |
| Selleck   |       |                                                                                                                                                                            |                |         |                                          |
| Chemicals | S3047 | <chem>C([N+](CC)(CC)C)CO C(=O)c1ccc(NC(=O)c2ccccc2OCCCCCCCC)cc1.[Br-]</chem>                                                                                               | C29H43BrN2O4   | 563.567 | Otilonium Bromide                        |
| Selleck   |       |                                                                                                                                                                            |                |         |                                          |
| Chemicals | S2851 | <chem>CCS(N1CC(n2ncc(c3ncnc(c34)[nH]cc4)c2)(CC#N)C1)=O=O</chem>                                                                                                            | C16H17N7O2S    | 371.417 | INC028050)                               |
| Selleck   |       |                                                                                                                                                                            |                |         |                                          |
| Chemicals | S3063 | <chem>c1c(Cl)c(Nc2Cc(C(=O)O)cccc2)c(Cl)cc1.N(CC)CC</chem>                                                                                                                  | C18H22Cl2N2O2  | 369.285 | Diclofenac Diethylamine                  |
| Selleck   |       |                                                                                                                                                                            |                |         |                                          |
| Chemicals | S2860 | <chem>C(N)CCCCNCC1(CC(CC2C1)CC3C2)C3.Br.Br</chem>                                                                                                                          | C16H32Br2N2    | 412.247 | IEM 1754 dihydrobroMide                  |

|           |       |                                                                               |                |         |                        |
|-----------|-------|-------------------------------------------------------------------------------|----------------|---------|------------------------|
| Selleck   |       | <chem>C1=C[C@@]2(C)C(CC[C@]3([H])[C@@]2(C)[C@H](O)C[C@@]4(C)[C@</chem>        |                |         | Beclomethasone         |
| Chemicals | S3078 | <chem>@]3([H])C[C@H](C)[C@@]4(OC(CC)=O)C(=O)CO C(CC)=O)=CC1=O</chem>          | C28H37ClO7     | 521.042 | dipropionate           |
| Selleck   |       |                                                                               |                |         |                        |
| Chemicals | S2868 | <chem>C(#N)c1cccc1CN2C(=O)N(C)C(=O)C=C2N3C[C@H](N)CCC3</chem>                 | C18H21N5O2     | 339.392 | Alogliptin             |
| Selleck   |       |                                                                               |                |         |                        |
| Chemicals | S3106 | <chem>S1C[C@H](C(O)=O)N(C)[C@H]2CCC(=O)N2=O)C1</chem>                         | C9H12N2O4S     | 244.268 | Pidotimod              |
| Selleck   |       | <chem>c1c(C(O)[C@@H]2C([C@@]3(C)C(=O)[C@H](O)C(C([C@@]24O)(C)C)=C</chem>      |                |         |                        |
| Chemicals | S1148 | <chem>(C)[C@H](OC(=O)[C@H](O)[C@H](NC(=O)OC(C)(C)C)c5cccc5)C4)[C</chem>       | C43H53NO14     | 807.879 | Docetaxel              |
| Selleck   |       | <chem>@]6(OC(=O)C)[C@H](OC6)C[C@H]3O)=O)cccc1</chem>                          |                |         |                        |
| Chemicals | S1921 | <chem>c1cc2c(C(=O)C(c3cccc3)C2=O)cc1</chem>                                   | C15H10O2       | 222.239 | Phenindione            |
| Selleck   |       |                                                                               |                |         |                        |
| Chemicals | S1252 | <chem>N(C(=O)c1c(n([C@@H]2C(=C)[C@H](CO)[C@H](O)C2)cn1)N3)=C3N.O</chem>       | C12H17N5O4     | 295.294 | Entecavir Hydrate      |
| Selleck   |       |                                                                               |                |         |                        |
| Chemicals | S1983 | <chem>c([nH]cn1)(ncnc2N)c12.Cl</chem>                                         | C5H6ClN5       | 171.588 | Adenine HCl            |
| Selleck   |       |                                                                               |                |         |                        |
| Chemicals | S1328 | <chem>c1cc(CC)c2c(c3c([C@](CC)(CC(O)=O)OCC3)[nH]2)c1</chem>                   | C17H21NO3      | 287.354 | Etodolac               |
| Selleck   |       |                                                                               |                |         |                        |
| Chemicals | S2046 | <chem>c1(CC)cnc(CCOc2ccc(CC3SC(=O)NC3=O)cc2)cc1.Cl</chem>                     | C19H21ClN2O3S  | 392.9   | Pioglitazone HCl       |
| Selleck   |       | <chem>C1(=O)N2[C@@]([H])([C@H](O)C(S[C@H]3C[C@H](CNS(=O)(=O)N)N</chem>        |                |         |                        |
| Chemicals | S1374 | <chem>C3)=C2C(O)=O)[C@]1([H])[C@H](O)C.O</chem>                               | C15H26N4O7S2   | 438.52  | Doripenem Hydrate      |
| Selleck   |       |                                                                               |                |         |                        |
| Chemicals | S2085 | <chem>c1(OC)cc(C(=O)OCC(N(C)C)(CC)c2ccccc2)cc(OC)c1OC</chem>                  | C22H29NO5      | 387.469 | Trimebutine            |
| Selleck   |       | <chem>[C@H]1(N(C([C@H]2CC[C@H](C)CC2)=O)c3cc(C#CC(C)(C)C)sc3C(=O)O</chem>     |                |         | VX-222 (VCH-222,       |
| Chemicals | S1480 | <chem>)CC[C@H](O)CC1</chem>                                                   | C25H35NO4S     | 445.615 | Lomibuvir)             |
| Selleck   |       |                                                                               |                |         |                        |
| Chemicals | S2123 | <chem>OC[C@H](O)[C@H](O)[C@H](O)[C@H](O)C=O</chem>                            | C6H12O6        | 180.156 | Dextrose               |
| Selleck   |       |                                                                               |                |         |                        |
| Chemicals | S1619 | <chem>c1c(C)c(NC(=O)C(C)NCCC)ccc1</chem>                                      | C13H20N2O      | 220.311 | Prilocaine             |
| Selleck   |       | <chem>c1(OC)c(OC)cc(Nc2ncc(F)c(Nc3ccc4c(NC(=O)C(C)(C)O4)n3)n2)cc1OC.c5</chem> |                |         |                        |
| Chemicals | S2194 | <chem>cc(S(=O)(=O)O)ccc5</chem>                                               | C28H29FN6O8S   | 628.629 | R406                   |
| Selleck   |       |                                                                               |                |         |                        |
| Chemicals | S1681 | <chem>c1c(N)ccc(O)c1C(=O)O</chem>                                             | C7H7NO3        | 153.135 | Mesalamine             |
| Selleck   |       | <chem>C1[C@](O)(C(O)=O)C[C@H](OC(=O)C=Cc2ccc(O)c(O)c2)[C@H](O)[C</chem>       |                |         |                        |
| Chemicals | S2280 | <chem>@H]1O</chem>                                                            | C16H18O9       | 354.309 | Chlorogenic Acid       |
| Selleck   |       | <chem>[Ca+2].c1cc2c(nc(C3CC3)c(C=C[C@H](C[C@H](O)CC(=O)[O-</chem>             |                |         |                        |
| Chemicals | S1759 | <chem>)O)c2c4ccc(F)cc4)cc1.c5cc6c(nc(C7CC7)c(C=C[C@H](C[C@H](O)CC(</chem>     | C50H46CaF2N2O8 | 880.984 | Pitavastatin Calcium   |
| Selleck   |       | <chem>=O)[O-])O)c6c8ccc(F)cc8)cc5</chem>                                      |                |         | L-(+)-Rhamnose         |
| Chemicals | S2317 | <chem>[C@H]1(O)[C@@H](C)OC(O)[C@H](O)[C@@H]1O.O</chem>                        | C6H14O6        | 182.172 | Monohydrate            |
| Selleck   |       |                                                                               |                |         |                        |
| Chemicals | S1808 | <chem>c1ccc([N+](=O)[O-])c(C2C(C(OC)=O)=C(C)NC(C)=C2C(=O)OC)c1</chem>         | C17H18N2O6     | 346.335 | Nifedipine             |
| Selleck   |       |                                                                               |                |         |                        |
| Chemicals | S2354 | <chem>C1CC2[C@](C)(CCCC2(C)C)[C@H](CCC(O)(C=C)C)[C@@]1(O)C</chem>             | C20H36O2       | 308.499 | Sclareol               |
| Selleck   |       |                                                                               |                |         |                        |
| Chemicals | S1880 | <chem>C(N1CCCC1)c2cccc(OCNC(=O)COC(=O)C)c2.Cl</chem>                          | C19H29ClN2O4   | 384.898 | Roxatidine Acetate HCl |
| Selleck   |       | <chem>C1[C@@H](O)C[C@]2(C3[C@H]4[C@]5O)[C@@](O)([C@H](O)C)[C</chem>           |                |         |                        |
| Chemicals | S2387 | <chem>@]6([H])[C@H](OC)C5)[C@]2([H])C6)[C@]([H])(C4)[C@](OC(=O)c7c</chem>     | C32H45BrN2O8   | 665.612 | Lappaconite HBr        |
| Selleck   |       | <chem>cccc7NC(C=O)(CN3CC)C1.Br</chem>                                         |                |         |                        |
| Chemicals | S2443 | <chem>c1(S(NC(NCCCC)=O)(=O)=O)ccc(C)cc1</chem>                                | C12H18N2O3S    | 270.348 | Tolbutamide            |
| Selleck   |       |                                                                               |                |         |                        |
| Chemicals | S2884 | <chem>O1C(C)=CC(=O)NS1(=O)=O.[K]</chem>                                       | C4H5KNO4S      | 202.25  | Acesulfame Potassium   |
| Selleck   |       |                                                                               |                |         |                        |
| Chemicals | S2524 | <chem>N1C([O-])=NC(=O)C1(c2cccc2)c3ccccc3.[Na+]</chem>                        | C15H11N2NaO2   | 274.25  | Phenytoin sodium       |
| Selleck   |       |                                                                               |                |         |                        |
| Chemicals | S2897 | <chem>c(c(Nc1ccc(Cl)cc1F)ncn2)(cc(OC)c(OC)c3)c23</chem>                       | C16H13ClFN3O2  | 333.745 | ZM 306416              |
| Selleck   |       |                                                                               |                |         |                        |
| Chemicals | S2577 | <chem>c1cc(NC(=O)C)ccc1OCC</chem>                                             | C10H13NO2      | 179.216 | Phenacetin             |
| Selleck   |       |                                                                               |                |         |                        |
| Chemicals | S2906 | <chem>c1c(c2onc(C)c2NC(=O)OC(C)c3ccccc3C)ccc(CSCCC(=O)OC)c1</chem>            | C24H25ClN2O5S  | 488.984 | Ki16198                |
| Selleck   |       | <chem>c1ccc(CNc2nc(Nc3cc4c(NC(=O)C4)cc3)nc2C(F)(F)F)c(N(S(=O)(C)=O)C)</chem>  |                |         |                        |
| Chemicals | S2672 | <chem>n1.c5cc(S(=O)(=O)O)ccc5</chem>                                          | C27H26F3N7O6S2 | 665.664 | PF-00562271            |
| Selleck   |       |                                                                               |                |         |                        |
| Chemicals | S2916 | <chem>c1cc(C(=O)Nc2cccc(NC(=O)CCC)c2)c(Br)cc1</chem>                          | C17H17BrN2O2   | 361.233 | ML161                  |
| Selleck   |       | <chem>c(ncc(c1cnn(C)c1)c2)(C=Cc3c(cc(NS(=O)(=O)N)C)C[C@H]4COCCO4)c</chem>     |                |         |                        |
| Chemicals | S2774 | <chem>c3)C5=O)c25</chem>                                                      | C24H25N5O5S    | 495.551 | MK-2461                |

|           |       |                                                                              |                |          |                          |
|-----------|-------|------------------------------------------------------------------------------|----------------|----------|--------------------------|
| Selleck   |       |                                                                              |                |          |                          |
| Chemicals | S2928 | <chem>C(Nc1nccc(c2sc(Cc)nc2c3cccc(C)c3)c1)(=O)c4cccc4</chem>                 | C24H21N3OS     | 399.508  | TAK-715                  |
| Selleck   |       |                                                                              |                |          |                          |
| Chemicals | S2817 | <chem>N1(c2cccc(C(F)(F)F)c2)c(c3C=CC1=O)c4c(ccc(c5ccc(N)nc5)c4)nc3</chem>    | C24H15F3N4O    | 432.397  | Torin 2                  |
| Selleck   |       | <chem>C1[C@@H](O)C(=O)[C@H](CC)C[C@@]2([H])C(C=[C@H](C)[C@H]2C</chem>        |                |          |                          |
| Chemicals | S3036 | <chem>C[C@H](O)C[C@@H](O)CC([O-])=O=[C@H]1O.[Na+]</chem>                     | C23H35NaO7     | 446.51   | Pravastatin sodium       |
| Selleck   |       | <chem>[C@H]1(O)[C@H](SC)O[C@H]([C@H](NC([C@H]2C[C@@H](CCC)C</chem>           |                |          |                          |
| Chemicals | S2830 | <chem>N2C)=O)C(C)C[C@H](O)[C@H]1O</chem>                                     | C18H33ClN2O5S  | 424.983  | Clindamycin              |
| Selleck   |       | <chem>[C@H]1(c2cccc2)c(c3CCN1C(O[C@]4([H])C(CCN5C4)CC5)=O)cccc3.C(O</chem>   |                |          |                          |
| Chemicals | S3048 | <chem>)(=O)CCC(O)=O</chem>                                                   | C27H32N2O6     | 480.553  | Solifenacin succinate    |
| Selleck   |       |                                                                              |                |          |                          |
| Chemicals | S2852 | <chem>[nH]1c(c2c(C3CCN(C)CC3)c1)ccc(O)c2</chem>                              | C14H18N2O      | 230.306  | BRL-54443                |
| Selleck   |       |                                                                              |                |          |                          |
| Chemicals | S3064 | <chem>[C@@H]1(O)CC[C@@H](NCc2cc(Br)cc(Br)c2N)CC1.Cl</chem>                   | C13H19Br2ClN2O | 414.564  | Ambroxol HCl             |
| Selleck   |       |                                                                              |                |          |                          |
| Chemicals | S2861 | <chem>c1(C#Cc2c(C)n(c3ccc(OC(F)(F)F)cc3)c(C)n2)cc(Cl)nc1</chem>              | C19H13ClF3N3O  | 391.774  | CTEP (RO4956371)         |
| Selleck   |       |                                                                              |                |          |                          |
| Chemicals | S3079 | <chem>C1(=C(O)C(=O)c2c(ccc2)C1=O)[C@H]3CC[C@H](c4ccc(Cl)cc4)CC3</chem>       | C22H19ClO3     | 366.837  | Atovaquone               |
| Selleck   |       |                                                                              |                |          |                          |
| Chemicals | S2870 | <chem>c1(O)cccc(c2cnc(c3n2)nc(N)nc3N)c1</chem>                               | C12H10N6O      | 254.247  | TG100713                 |
| Selleck   |       |                                                                              |                |          |                          |
| Chemicals | S3113 | <chem>c1nc(C)c(O)c(CO)c1CO.Cl</chem>                                         | C8H12ClNO3     | 205.639  | Pyridoxine HCl           |
| Selleck   |       |                                                                              |                |          |                          |
| Chemicals | S1195 | <chem>c1cc2c(ccc(C3(O)CCn4c3cnc4)c2)cc1C(=O)NC</chem>                        | C18H17N3O2     | 307.346  | TAK-700 (Orteronel)      |
| Selleck   |       | <chem>C1=C[C@@]2(C)C(C)C[C@]3([H])[C@@]2(F)[C@H](O)C[C@@]4(C)[C@</chem>      |                |          |                          |
| Chemicals | S1933 | <chem>@]3([H])C[C@@H](O)[C@@]4(O)C(=O)CO)=CC1=O</chem>                       | C21H27FO6      | 394.434  | Triamcinolone            |
| Selleck   |       |                                                                              |                |          |                          |
| Chemicals | S1256 | <chem>c1c(F)c(Cn2cc(C(N)=O)nn2)c(F)cc1</chem>                                | C10H8F2N4O     | 238.194  | Rufinamide               |
| Selleck   |       | <chem>c1c(C2C(C(=O)OCC)=C(C)NC(C)=C2C(=O)OCC)c(C=CC(O)C(C)C(=O))</chem>      |                |          |                          |
| Chemicals | S1994 | <chem>ccc1</chem>                                                            | C26H33NO6      | 455.543  | Lacidipine               |
| Selleck   |       |                                                                              |                |          |                          |
| Chemicals | S1334 | <chem>c1(F)ccc(CNc2ccc(NC(OCC)=O)c(N)n2)cc1.O(C=O)C=CC(=O)O</chem>           | C19H21FN4O6    | 420.392  | Flupirtine maleate       |
| Selleck   |       |                                                                              |                |          |                          |
| Chemicals | S2051 | <chem>C(O)=(O)[C@H]1CCCN1C(=O)[C@H](C)CS</chem>                              | C9H15NO3S      | 217.285  | Captopril                |
| Selleck   |       | <chem>c1(Cl)cc(C(=O)NCC2CN(Cc3ccc(F)cc3)CCO2)c(OCC)cc1N.OC(=O)CC(O)(</chem>  |                |          |                          |
| Chemicals | S1385 | <chem>C(O)=O)CC(=O)O</chem>                                                  | C27H33ClFN3O10 | 614.016  | Mosapride Citrate        |
| Selleck   |       |                                                                              |                |          |                          |
| Chemicals | S2092 | <chem>c1(Cc2c[nH]cn2)c(C)c(C)ccc1.Cl</chem>                                  | C12H15ClN2     | 222.714  | Detomidine HCl           |
| Selleck   |       |                                                                              |                |          |                          |
| Chemicals | S1534 | <chem>c1(Cl)cc2c([nH]c(C(NCCc3ccc(N4CCCCC4)cc3)=O)c2CC)cc1</chem>            | C24H28ClN3O    | 409.952  | Org 27569                |
| Selleck   |       |                                                                              |                |          |                          |
| Chemicals | S2124 | <chem>OC[C@@H](O)[C@H](O)[C@@H](O)C=O</chem>                                 | C5H10O5        | 150.13   | Xylose                   |
| Selleck   |       |                                                                              |                |          |                          |
| Chemicals | S1630 | <chem>N(C(=O)C(=C1)C(NN1)=N2)=C2</chem>                                      | C5H4N4O        | 136.111  | Allopurinol              |
|           |       | <chem>C(=O)(O)C=CC(=O)O.O.c1(OC)ccc(C[C@H](C(C)C)[C@H](N)[C@@H](O)</chem>    |                |          |                          |
| Selleck   |       | <chem>C[C@@H](C(C)C)C(=O)NCC(C)(C)C(=O)N)cc1OCCCCO.c2(OC)ccc(C[C</chem>      |                |          |                          |
| Chemicals | S2199 | <chem>@H](C(C)C)[C@H](N)[C@@H](O)C[C@@H](C(C)C)C(=O)NCC(C)(C)C(</chem>       | C64H110N6O16   | 1219.589 | Aliskiren Hemifumarate   |
| Selleck   |       | <chem>=O)N)cc2OCCCC</chem>                                                   |                |          |                          |
| Chemicals | S1683 | <chem>[Br-].C1(CC(O)C(=O)C(CO)c2ccccc2)C3([N+])(C(C)C)(C)C3CC1</chem>        | C20H30BrNO3    | 412.361  | Ipratropium Bromide      |
|           |       | <chem>N1(C)[C@H](CC(C)C)C(=O)N(C)[C@H](C(C)C)C(=O)N(C)[C@H]([C@@H]</chem>    |                |          |                          |
| Selleck   |       | <chem>([C@H](C)CC=CC)O)C(=O)N[C@@H](CC)C(=O)N(C)CC(=O)N(C)[C@@</chem>        |                |          |                          |
| Chemicals | S2286 | <chem>H](CC(C)C)C(=O)N[C@@H](C(C)C)C(=O)N(C)[C@@H](CC(C)C)C(=O)N[</chem>     | C62H111N11O12  | 1202.611 | Cyclosporin A            |
| Selleck   |       | <chem>C@@H](C)C(=O)N[C@H](C)C(=O)N(C)[C@@H](CC(C)C)C1=O</chem>               |                |          |                          |
| Chemicals | S1761 | <chem>c1(C(=O)c2cccs2)ccc(C(C)C(=O)O)cc1</chem>                              | C14H12O3S      | 260.308  | Suprofen                 |
| Selleck   |       |                                                                              |                |          |                          |
| Chemicals | S2321 | <chem>c1c(CC=C)cc(c2c(O)ccc(CC=C)c2)c(O)c1</chem>                            | C18H18O2       | 266.334  | Magnolol                 |
| Selleck   |       | <chem>[Ca+2].O(c1ccccc1)c2cc(C(C(=O)O)[O-</chem>                             |                |          |                          |
| Chemicals | S1823 | <chem>])Cccc2.O(c3ccccc3)c4cc(C(C(=O)[O-])C)ccc4</chem>                      | C30H26CaO6     | 522.602  | Fenoprofen Calcium       |
| Selleck   |       | <chem>c1(OC)c(O)ccc(C2C(CO)O)c3c(ccc(C4OC5c(c(O)cc(O)c5)C(=O)C4O)c3)O</chem> |                |          |                          |
| Chemicals | S2358 | <chem>2)c1</chem>                                                            | C25H22O10      | 482.436  | Silymarin                |
| Selleck   |       |                                                                              |                |          |                          |
| Chemicals | S1885 | <chem>C(C(=O)OCC)(C(c1c(Cl)c(Cl)ccc1)C(C(=O)O)C)=C(C)N2)=C2C</chem>          | C18H19Cl2NO4   | 384.254  | Felodipine               |
|           |       | <chem>c1(O[C@H]2[C@@H](O[C@]3([H])O[C@@H](C)[C@H](O)[C@@H](O)[C</chem>       |                |          |                          |
| Selleck   |       | <chem>@H]3O)[C@@H](O)[C@H](O)[C@@H](CO)O2)cc(O)c(C(=O)CCc4ccc(O</chem>       |                |          |                          |
| Chemicals | S2389 | <chem>)cc4)c(O)c1</chem>                                                     | C27H34O14      | 582.55   | Naringin Dihydrochalcone |



|           |       |                                                                                                                        |               |         |                      |
|-----------|-------|------------------------------------------------------------------------------------------------------------------------|---------------|---------|----------------------|
| Selleck   |       | <chem>C1[C@@H](O)[C@@]2(C)[C@@]([H])([C@H](O)[C@H](OC(=O)C)[C@]3(C)[C@@]2(O)C(=O)C[C@](C)(C=CO3)C(C)(C)C1</chem>       | C22H34O7      | 410.501 | Forskolin            |
| Chemicals | S2449 |                                                                                                                        |               |         |                      |
| Selleck   |       | <chem>c(sc(C(N)=O)c1)(cnc2Sc3ccc(C)cc3)c12</chem>                                                                      | C15H12N2OS2   | 300.399 | A-205804             |
| Chemicals | S2885 |                                                                                                                        |               |         |                      |
| Selleck   |       | <chem>c1cc2c(C(=O)c3c(c(O)c(O)cc3)C2=O)cc1</chem>                                                                      | C14H8O4       | 240.211 | Alizarin             |
| Chemicals | S2526 |                                                                                                                        |               |         |                      |
| Selleck   |       | <chem>c1cc(C(N)=O)cc(c2cc(Nc3ccc(OC(F)(F)F)cc3)ncn2)c1</chem>                                                          | C18H13F3N4O2  | 374.317 | GNF-2                |
| Chemicals | S2899 |                                                                                                                        |               |         |                      |
| Selleck   |       | <chem>c1cc(C[C@@H](C(=O)OCC)N[C@H](C)C(=O)N2Cc3c(cccc3)C[C@H]2C(=O)O)ccc1.Cl</chem>                                    | C25H31ClN2O5  | 474.977 | Quinapril HCl        |
| Chemicals | S2581 |                                                                                                                        |               |         |                      |
| Selleck   |       | <chem>N1(C=C(C)C=CC1=O)c2ccccc2</chem>                                                                                 | C12H11NO      | 185.222 | Pirfenidone          |
| Chemicals | S2907 |                                                                                                                        |               |         |                      |
| Selleck   |       | <chem>c1c(O)c2c(OC(c3ccccc3Cl)=CC2=O)c([C@@]4([H])CCN(C)C[C@H]4O)c1O.Cl</chem>                                         | C21H21Cl2NO5  | 438.301 | Flavopiridol HCl     |
| Chemicals | S2679 |                                                                                                                        |               |         |                      |
| Selleck   |       | <chem>c1(c2ncn1CC(=O)Nc3ccc(C(C)C)cc3)C(=O)N(C)C(=O)N2C</chem>                                                         | C18H21N5O3    | 355.391 | HC-030031            |
| Chemicals | S2918 |                                                                                                                        |               |         |                      |
| Selleck   |       | <chem>c1c(C(O)=O)cc(C=Cc2ccc(OCc3c(C(C)C)onc3c4c(Cl)cccc4Cl)cc2Cl)cc1</chem>                                           | C28H22Cl3NO4  | 542.838 | GW4064               |
| Chemicals | S2782 |                                                                                                                        |               |         |                      |
| Selleck   |       | <chem>C1CC2=C(S(C(=N)N2CC(=O)c3ccc(C)cc3)CC1.Br</chem>                                                                 | C16H19BrN2OS  | 367.304 | Pifithrin-? (PFT?)   |
| Chemicals | S2929 |                                                                                                                        |               |         |                      |
| Selleck   |       | <chem>c1(NC(=O)C)ccc(C(Nc2ccccc2N)=O)cc1</chem>                                                                        | C15H15N3O2    | 269.298 | Cl994 (Tacedinaline) |
| Chemicals | S2818 |                                                                                                                        |               |         |                      |
| Selleck   |       | <chem>N1(CCCC(O)=O)CCC(O[C@@H](c2ccc(Cl)cc2)c3ncccc3)CC1.c4ccc(S(=O)(=O)O)c4</chem>                                    | C27H31ClN2O6S | 547.063 | Bepotastine Besilate |
| Chemicals | S3037 |                                                                                                                        |               |         |                      |
| Selleck   |       | <chem>C1[C@@]2(C)[C@@]([H])(CC[C@]3([H])[C@@]2([H])CC[C@]4(C)[C@@]3([H])CCC4=O)C[C@H]1O</chem>                         | C19H30O2      | 290.44  | Epiandrosterone      |
| Chemicals | S2832 |                                                                                                                        |               |         |                      |
| Selleck   |       | <chem>c1(S(Nc2c(OC3ccccc3OC)c(OCOC)nc(c4ncccc4)n2)(=O)=O)ccc(C(C)(C)C)cc1.O</chem>                                     | C27H31N5O7S   | 569.629 | Bosentan Hydrate     |
| Chemicals | S3051 |                                                                                                                        |               |         |                      |
| Selleck   |       | <chem>C(=O)(N1CCOCC1)Cc2c(c3n(C(=O)c4ccc(Cl)cc4)c2C)cc(OC)cc3</chem>                                                   | C23H23ClN2O4  | 426.893 | BML-190              |
| Chemicals | S2854 |                                                                                                                        |               |         |                      |
| Selleck   |       | <chem>c(c1c(OCc2)(c2C3)[C@@](CCN4CC(=O)C[C@@]5([H])O1)[C@@](O)(CCC5=O)[C@@H]34.Cl</chem>                               | C19H22ClNO4   | 363.835 | Naloxone HCl         |
| Chemicals | S3066 |                                                                                                                        |               |         |                      |
| Selleck   |       | <chem>c1(C(Nc2ccc(Cl)c2)=O)ncccc1</chem>                                                                               | C12H9ClN2O    | 232.666 | VU 0364770           |
| Chemicals | S2862 |                                                                                                                        |               |         |                      |
| Selleck   |       | <chem>c1(OC2c(C)cc(C#N)cc2C)c(Br)c(N)nc(Nc3ccc(C#N)cc3)n1</chem>                                                       | C20H15BrN6O   | 435.277 | Etravirine (TMC125)  |
| Chemicals | S3080 |                                                                                                                        |               |         |                      |
| Selleck   |       | <chem>C(Nc1ccnc1)(=O)c2cc([N+])([O-])=O)ccc2Cl</chem>                                                                  | C12H8ClN3O3   | 277.663 | T0070907             |
| Chemicals | S2871 |                                                                                                                        |               |         |                      |
| Selleck   |       | <chem>OC1=C(O)C(=O)O[C@@H]1[C@H](CO)O</chem>                                                                           | C6H8O6        | 176.124 | Vitamin C            |
| Chemicals | S3114 |                                                                                                                        |               |         |                      |
| Selleck   |       | <chem>c1(S(Nc2nccs2)(=O)=O)ccc(N)cc1</chem>                                                                            | C9H9N3O2S2    | 255.317 | Sulfathiazole        |
| Chemicals | S3116 |                                                                                                                        |               |         |                      |
| Selleck   |       | <chem>c1cc(C(c2cccn2)CCN(C)C)ccc1.C(=O)(O)C=CC(=O)O</chem>                                                             | C20H24N2O4    | 356.416 | Pheniramine Maleate  |
| Chemicals | S4045 |                                                                                                                        |               |         |                      |
| Selleck   |       | <chem>C1N(CN(CN2C3)CN13)C2</chem>                                                                                      | C6H12N4       | 140.186 | Methenamine          |
| Chemicals | S3139 |                                                                                                                        |               |         |                      |
| Selleck   |       | <chem>C1[C@@]2(C)C[C@@H](SC(=O)C)[C@]3([H])[C@@]2([H])CC[C@@]4(C)[C@@]3([H])CC[C@]45CCC(=O)O5)=CC1=O</chem>            | C24H32O4S     | 416.573 | Spironolactone       |
| Chemicals | S4054 |                                                                                                                        |               |         |                      |
| Selleck   |       | <chem>c1(CN(Cc2ccc(C(C)(C)cc2)C)c(c3ccc1)cccc3.Cl</chem>                                                               | C23H28ClN     | 353.928 | Butenafine HCl       |
| Chemicals | S3154 |                                                                                                                        |               |         |                      |
| Selleck   |       | <chem>c1c([N+])([O-])=O)n(CCS(=O)(=O)CC)c(C)n1</chem>                                                                  | C8H13N3O4S    | 247.272 | Tinidazole           |
| Chemicals | S4068 |                                                                                                                        |               |         |                      |
| Selleck   |       | <chem>c1cc2c(CN3C(=NC(=O)C3)N2)c(Cl)c1Cl.Cl</chem>                                                                     | C10H8Cl3N3O   | 292.549 | Anagrelide HCl       |
| Chemicals | S3172 |                                                                                                                        |               |         |                      |
| Selleck   |       | <chem>C(O)(=O)c1cccc1Nc2cccc(C)c2C</chem>                                                                              | C15H15NO2     | 241.285 | Mefenamic Acid       |
| Chemicals | S4078 |                                                                                                                        |               |         |                      |
| Selleck   |       | <chem>c(C(=C1CCN(C)CC1)c2c(cccc2)CC3)(nccc4)c34.C(O)(=O)C=CC(O)=O.C(O)(=O)C=CC(O)=O</chem>                             | C28H30N2O8    | 522.546 | Azatadine dimaleate  |
| Chemicals | S3186 |                                                                                                                        |               |         |                      |
| Selleck   |       | <chem>C1=C[C@@]2(C)C[C@@H](F)C[C@]3([H])[C@@]2(F)[C@H](O)C[C@@]4(C)[C@@]3([H])C[C@@H](C)[C@@]4(C(=O)CO)O)=CC1=O</chem> | C22H28F2O5    | 410.452 | Flumethasone         |
| Chemicals | S4088 |                                                                                                                        |               |         |                      |
| Selleck   |       | <chem>c1cc2c([nH]c3c2CCN(C[C@@]45[H])[C@]([H])(C(CC)=C4)[C@]3(C(OC)=O)C5)cc1</chem>                                    | C21H24N2O2    | 336.427 | Catharanthine        |
| Chemicals | S3202 |                                                                                                                        |               |         |                      |
| Selleck   |       | <chem>C1[C@@]2(C)C[C@]3([H])[C@@]2(F)[C@H](O)C[C@@]4(C)[C@@]3([H])C[C@@H]5[C@]4(C(Cl)=O)OC(C)(CO5)=CC1=O</chem>        | C24H32ClFO5   | 454.959 | Halcinonide          |
| Chemicals | S4098 |                                                                                                                        |               |         |                      |
| Selleck   |       | <chem>[C@]1([H])CC[C@H]2[C@H](C)CC(=O)O[C@]2(C)CC[C@@]3([H])[C@@]1([H])CC[C@]4([H])[C@]3(C)CC[C@@H](O)C4</chem>        | C24H40O3      | 376.573 | Lithocholic acid     |
| Chemicals | S4003 |                                                                                                                        |               |         |                      |
| Selleck   |       | <chem>N1(c2ccc(Cl)cc2)c3c(cccc3)N=C4C1=CC(=NC(C)C)C(Nc5ccc(Cl)cc5)=C4</chem>                                           | C27H22Cl2N4   | 473.396 | Clofazimine          |
| Chemicals | S4107 |                                                                                                                        |               |         |                      |

|           |       |                                                                                                                                                                                                                                                                                                                                       |                |          |                                                   |
|-----------|-------|---------------------------------------------------------------------------------------------------------------------------------------------------------------------------------------------------------------------------------------------------------------------------------------------------------------------------------------|----------------|----------|---------------------------------------------------|
| Selleck   |       |                                                                                                                                                                                                                                                                                                                                       |                |          |                                                   |
| Chemicals | S4014 | <chem>C1(OC(=O)[C@H](CO)c2ccccc2)CC3N(C)C(CC3)C1</chem>                                                                                                                                                                                                                                                                               | C17H23NO3      | 289.369  | Hyoscyamine                                       |
| Selleck   |       |                                                                                                                                                                                                                                                                                                                                       |                |          |                                                   |
| Chemicals | S4118 | <chem>c1(nc[nH]c1)CCN.Cl.Cl</chem>                                                                                                                                                                                                                                                                                                    | C5H11Cl2N3     | 184.067  | Histamine 2HCl                                    |
| Selleck   |       |                                                                                                                                                                                                                                                                                                                                       |                |          |                                                   |
| Chemicals | S4023 | <chem>c1(ccc(N)cc1)C(=O)OCCN(CC)CC.Cl</chem>                                                                                                                                                                                                                                                                                          | C13H21ClN2O2   | 272.771  | Procaine HCl                                      |
| Selleck   |       |                                                                                                                                                                                                                                                                                                                                       |                |          |                                                   |
| Chemicals | S4132 | <chem>c1cc(OC2OCCCC2)ccc1O</chem>                                                                                                                                                                                                                                                                                                     | C11H14O3       | 194.227  | Deoxyarbutin                                      |
| Selleck   |       |                                                                                                                                                                                                                                                                                                                                       |                |          |                                                   |
| Chemicals | S4037 | <chem>C1(=O)N(CC)CC(CCN2CCOCC2)C1(c3ccccc3)c4ccccc4.Cl.O</chem><br><chem>C([C@@H](N)C1=NCC(C(=O)N[C@@H](CC(C)C)C(N[C@@H](CCC(=O)O)C(=O)N[C@@H]([C@@H](CC(C)C)C(N[C@@H]2CCCCNC(=O)[C@H](C)C(N)=O)NC(=O)[C@H](CC(O)=O)NC(=O)[C@H](Cc3c[nH]cn3)NC(=O)[C@H](Cc4ccccc4)NC(=O)[C@H]([C@H](C)CC)NC(=O)[C@@H](CCCN)NC2=O)=O)=O)S1)(C)C</chem> | C24H33ClN2O3   | 432.983  | Doxapram HCl                                      |
| Selleck   |       |                                                                                                                                                                                                                                                                                                                                       |                |          |                                                   |
| Chemicals | S4146 |                                                                                                                                                                                                                                                                                                                                       | C65H101N17O16S | 1408.667 | Bacitracin                                        |
| Selleck   |       |                                                                                                                                                                                                                                                                                                                                       |                |          |                                                   |
| Chemicals | S4161 | <chem>c1cc(C(=O)O)ccc1</chem>                                                                                                                                                                                                                                                                                                         | C7H6O2         | 122.121  | Benzoic Acid                                      |
| Selleck   |       |                                                                                                                                                                                                                                                                                                                                       |                |          |                                                   |
| Chemicals | S4257 | <chem>c([nH]nn1)(cc(OC)c(C(=O)NCC2CCCN2CC=C)c3)c13.Cl</chem>                                                                                                                                                                                                                                                                          | C16H22ClN5O2   | 351.831  | Alizapride HCl                                    |
| Selleck   |       |                                                                                                                                                                                                                                                                                                                                       |                |          |                                                   |
| Chemicals | S4170 | <chem>O1c(c2C=CC1=O)cccc2</chem>                                                                                                                                                                                                                                                                                                      | C9H6O2         | 146.143  | Coumarin                                          |
| Selleck   |       | <chem>c1cnc2c(c(Br)c(NC(NCC3=N3)cc2)n1.[C@H](C(=O)O)(O)[C@@H](O)C(=O)O</chem>                                                                                                                                                                                                                                                         | C15H16BrN5O6   | 442.221  | Brimonidine Tartrate                              |
| Chemicals | S4266 | <chem>N1(S(C(=O)=O)CCN(C(N[C@@H](c2ccccc2)C(N[C@H]3C(=O)N4[C@@]3([H])SC(C)(C)[C@@H]4C(=O)[O-])=O)=O)C1=O.[Na+]</chem>                                                                                                                                                                                                                 | C21H24N5NaO8S2 | 561.564  | Mezlocillin Sodium                                |
| Selleck   |       |                                                                                                                                                                                                                                                                                                                                       |                |          |                                                   |
| Chemicals | S4278 | <chem>c1cc2c(CCC(=O)N2)c(OCC(O)CNC(C)(C)C)c1.Cl</chem>                                                                                                                                                                                                                                                                                | C16H25ClN2O3   | 328.834  | Carteolol HCl                                     |
| Selleck   |       |                                                                                                                                                                                                                                                                                                                                       |                |          |                                                   |
| Chemicals | S4189 | <chem>C1C(OC(C(O)c2ccccc2)=O)CC(C)(C)CC1C</chem><br><chem>[C@H]1(O)C[C@]([H])(O[C@@H]2[C@H](C)O[C@@]([H])(O[C@H]3CC[C@@]4(C)[C@]([H])(CC[C@]5([H])[C@@]4([H])C[C@@H](O)[C@@]6(C)[C@]5(O)CC[C@H]6C7=CC(=O)OC7C3)C[C@@H]2O)O[C@H](C)[C@H]1O[C@@]8([H])C[C@H](O)[C@H](O)[C@@H](C)O8</chem>                                               | C17H24O3       | 276.371  | Cyclandelate                                      |
| Selleck   |       |                                                                                                                                                                                                                                                                                                                                       |                |          |                                                   |
| Chemicals | S4290 |                                                                                                                                                                                                                                                                                                                                       | C41H64O14      | 780.938  | Digoxin                                           |
| Selleck   |       |                                                                                                                                                                                                                                                                                                                                       |                |          |                                                   |
| Chemicals | S4198 | <chem>c1nc(N)sc1</chem>                                                                                                                                                                                                                                                                                                               | C3H4N2S        | 100.142  | Aminothiazole                                     |
| Selleck   |       | <chem>Cl.c1c(C(F)(F)F)c2c(c([C@@H]([C@@]3([H])CCCCN3)O)cc(C(F)(F)F)n2)cc1</chem>                                                                                                                                                                                                                                                      | C17H17ClF6N2O  | 414.773  | Mefloquine HCl                                    |
| Chemicals | S4420 |                                                                                                                                                                                                                                                                                                                                       |                |          |                                                   |
| Selleck   |       |                                                                                                                                                                                                                                                                                                                                       |                |          |                                                   |
| Chemicals | S4207 | <chem>c1cc(OC(C)(C)C(O)=O)ccc1Cl</chem>                                                                                                                                                                                                                                                                                               | C10H11ClO3     | 214.646  | Clofibric Acid                                    |
| Selleck   |       |                                                                                                                                                                                                                                                                                                                                       |                |          |                                                   |
| Chemicals | S4921 | <chem>c(OCO1)(cc(C=C[N+](O-))=O)cc2)c12</chem>                                                                                                                                                                                                                                                                                        | C9H7NO4        | 193.156  | MNS (3,4-Methylenedioxy-<br>?-nitrostyrene, MDBN) |
| Selleck   |       |                                                                                                                                                                                                                                                                                                                                       |                |          |                                                   |
| Chemicals | S4217 | <chem>c1(c(l)cc(C[C@H](N)C([O-])=O)cc1l)Oc2ccc(O)c(l)c2.[Na+]</chem>                                                                                                                                                                                                                                                                  | C15H11Cl3NNaO4 | 672.955  | Liothyronine Sodium                               |
| Selleck   |       |                                                                                                                                                                                                                                                                                                                                       |                |          |                                                   |
| Chemicals | S7016 | <chem>n1c(N)ncc(c2c3c(n(C(C)C)c(C)n3)nc(N4CCOCC4)n2)c1</chem><br><chem>[C@@H]1(CC)[C@H](O[C@@]2([H])[C@H](O)[C@@H](O)[C@H](OC(=O)C(C)C(C)(C)O2)C(C)=CC(C)=CC[C@]([H])([C@H](O)C)OC(=O)C(CO)[C@@H]3O[C@H](C)[C@@H](OCc4c(O)c(C)c(C)c4CC=O)[C@H](O)[C@@H]3O)C=CC[C@H](O)C(C)=C1</chem>                                                  | C17H22N8O      | 354.41   | VS-5584 (SB2343)                                  |
| Selleck   |       |                                                                                                                                                                                                                                                                                                                                       |                |          |                                                   |
| Chemicals | S4227 |                                                                                                                                                                                                                                                                                                                                       | C52H74Cl2O18   | 1058.039 | Fidaxomicin                                       |
| Selleck   |       |                                                                                                                                                                                                                                                                                                                                       |                |          |                                                   |
| Chemicals | S7036 | <chem>c1c(NC(=O)[C@H]2NCCC2)ccc(c3nc(Nc4ccc(N5CCOCC5)cc4)ncc3)c1</chem>                                                                                                                                                                                                                                                               | C25H28N6O2     | 444.529  | XL019                                             |
| Selleck   |       |                                                                                                                                                                                                                                                                                                                                       |                |          |                                                   |
| Chemicals | S4237 | <chem>c1(OC)cc2c(nc2c2c(NC(C)CCCN)c1.OP(O)(=O)O.OP(O)(=O)O</chem><br><chem>C(Nc1ccc(C(N2CCOCC2)=O)cc1)(C(=O)N(C)C=C3c4c(C)c(NC(=O)c5ccc(C(C)(C)C)cc5)ccc4)=N3</chem>                                                                                                                                                                  | C15H27N3O9P2   | 455.337  | Primaquine Diphosphate                            |
| Selleck   |       |                                                                                                                                                                                                                                                                                                                                       |                |          |                                                   |
| Chemicals | S7051 | <chem>C(O)(=O)CCC(O)=O.O1c2c(c(N)c(Cl)cc2C(NC3CCN(CCCOC)CC3)=O)CC1</chem>                                                                                                                                                                                                                                                             | C34H37N5O4     | 579.689  | CGI1746                                           |
| Selleck   |       |                                                                                                                                                                                                                                                                                                                                       |                |          |                                                   |
| Chemicals | S4247 |                                                                                                                                                                                                                                                                                                                                       | C22H32ClN3O7   | 485.958  | Prucalopride Succinat                             |
| Selleck   |       |                                                                                                                                                                                                                                                                                                                                       |                |          |                                                   |
| Chemicals | S7076 | <chem>c1cc(S(=O)(N(CC(F)(F)F)c2ccc(C(F)(F)F)(O)C(F)(F)F)cc2)=O)ccc1</chem>                                                                                                                                                                                                                                                            | C17H12F9NO3S   | 481.333  | T0901317                                          |
| Selleck   |       |                                                                                                                                                                                                                                                                                                                                       |                |          |                                                   |
| Chemicals | S3121 | <chem>c1nc(C)n(CC(O)CC)c1[N+](O-)=O</chem>                                                                                                                                                                                                                                                                                            | C7H10ClN3O3    | 219.626  | Ornidazole                                        |
| Selleck   |       | <chem>c1cc2c(C[C@]3([H])[C@@]2([H])CC[C@@]4(C)[C@@]3([H])CC[C@H]4OC(CCC5CC5)=O)cc1O</chem>                                                                                                                                                                                                                                            | C26H36O3       | 396.562  | Estradiol Cypionate                               |
| Selleck   |       |                                                                                                                                                                                                                                                                                                                                       |                |          |                                                   |
| Chemicals | S3140 | <chem>[C@H]1(CN)C[C@@]1(c2ccccc2)C(=O)N(CC)CC.Cl</chem>                                                                                                                                                                                                                                                                               | C15H23ClN2O    | 282.809  | Milnacipran HCl                                   |

|           |       |                                                                                                                                                   |                |         |                         |
|-----------|-------|---------------------------------------------------------------------------------------------------------------------------------------------------|----------------|---------|-------------------------|
| Selleck   |       | <chem>[C@@]1([H])(C[C@H](SCC(=O)O)[C@H]2[C@@]3(C)[C@@]4([H])[C@](CCC4=O)(C[C@H]3C)[C@@H](C)[C@H](O)[C@](C=C)(C)C2)C5)N(C)[C@]5([H])CC1</chem>     | C30H47NO4S     | 517.763 | Retapamulin             |
| Chemicals | S4056 |                                                                                                                                                   |                |         |                         |
| Selleck   |       |                                                                                                                                                   |                |         |                         |
| Chemicals | S3155 | <chem>N1(C)CCCCC1C(Nc2c(C)cccc2C)=O.Cl</chem>                                                                                                     | C15H23ClN2O    | 282.809 | Mepivacaine HCl         |
| Selleck   |       |                                                                                                                                                   |                |         |                         |
| Chemicals | S4070 | <chem>NC(=N)N.Cl</chem>                                                                                                                           | CH6ClN3        | 95.531  | Guanidine HCl           |
| Selleck   |       |                                                                                                                                                   |                |         |                         |
| Chemicals | S3173 | <chem>N1(C)C(C)=CC(=O)N1c2ccccc2</chem>                                                                                                           | C11H12N2O      | 188.226 | Antipyrine              |
| Selleck   |       |                                                                                                                                                   |                |         |                         |
| Chemicals | S4079 | <chem>n1([C@@H]2[C@H](OCCO)[C@H](O)[C@H]2O)nnc3c1nc(SCCC)nc3N[C@@H]4C[C@@H]4c5ccc(F)c(F)c5</chem>                                                 | C23H28F2N6O4S  | 522.568 | Ticagrelor              |
| Selleck   |       |                                                                                                                                                   |                |         |                         |
| Chemicals | S3188 | <chem>c1cc(C(O)CN)ccc1O.Cl</chem>                                                                                                                 | C8H12ClNO2     | 189.639 | (+,-)-Octopamine HCl    |
| Selleck   |       |                                                                                                                                                   |                |         |                         |
| Chemicals | S4089 | <chem>C1=C[C@@]2(C)C([C@@H](F)C[C@]3([H])[C@@]2(F)[C@H](O)C[C@@]4(C)[C@]3([H])C[C@H](C)[C@@]4(O)C(C)C(=O)C(=O)CC1=O</chem>                        | C25H31ClF2O5   | 484.96  | Halobetasol Propionate  |
| Selleck   |       |                                                                                                                                                   |                |         |                         |
| Chemicals | S3204 | <chem>c1(O)cccc(C2(CC)CCCCN(C)C2)c1.Cl</chem>                                                                                                     | C15H24ClNO     | 269.81  | Meptazinol HCl          |
| Selleck   |       |                                                                                                                                                   |                |         |                         |
| Chemicals | S4099 | <chem>c1(OCC(F)(F)F)c(C)c(C)[S@@](=O)c2[nH]c3c(cccc2)n2ncc1</chem>                                                                                | C16H14F3N3O2S  | 369.361 | Dexlansoprazole         |
| Selleck   |       |                                                                                                                                                   |                |         |                         |
| Chemicals | S4004 | <chem>[C@H](CO)(CC)NCCN[C@H](CO)CC.Cl.Cl</chem>                                                                                                   | C10H26Cl2N2O2  | 277.232 | Ethambutol HCl          |
| Selleck   |       |                                                                                                                                                   |                |         |                         |
| Chemicals | S4109 | <chem>C1Cc2c(cc(Cl)cc2)[C@@H](C)CN1.Cl</chem>                                                                                                     | C11H15Cl2N     | 232.15  | Lorcaserin HCl          |
| Selleck   |       |                                                                                                                                                   |                |         |                         |
| Chemicals | S4015 | <chem>C1(CCCCC1)NS(=O)(=O)O</chem>                                                                                                                | C6H13NO3S      | 179.237 | Cyclamic acid           |
| Selleck   |       |                                                                                                                                                   |                |         |                         |
| Chemicals | S4120 | <chem>c1n(CC(SCc2ccc(Cl)cc2)c3ccc(Cl)cc3Cl)ccn1.[N+](=[O-])(=O)O[Br-].[C@@]1([H])(C[C@@H](OC(=O)C(O)c2ccccc2)C3)[N+](C)(C)[C@]3([H])CC1</chem>    | C18H16Cl3N3O3S | 460.762 | Sulconazole Nitrate     |
| Selleck   |       |                                                                                                                                                   |                |         | Homatropine             |
| Chemicals | S4024 |                                                                                                                                                   | C17H24BrNO3    | 370.281 | Methylbromide           |
| Selleck   |       |                                                                                                                                                   |                |         |                         |
| Chemicals | S4135 | <chem>c1cc(Cl)c(C(O)CNC(C)C)cc1.Cl</chem>                                                                                                         | C11H17Cl2NO    | 250.165 | Clorprenaline HCl       |
| Selleck   |       |                                                                                                                                                   |                |         |                         |
| Chemicals | S4038 | <chem>c1(cccc2)c2nc(OCCCC)cc1C(=O)NCCN(CC)CC.Cl</chem>                                                                                            | C20H30ClN3O2   | 379.924 | Dibucaine HCl           |
| Selleck   |       |                                                                                                                                                   |                |         |                         |
| Chemicals | S4148 | <chem>c1ccc([C@@H](N)C(=O)N[C@H]2[C@@]3([H])N([C@@H](C(=O)O)C(C)(C)S3)C2=O)cc1.O.O.O</chem>                                                       | C16H25N3O7S    | 403.451 | Ampicillin Trihydrate   |
| Selleck   |       |                                                                                                                                                   |                |         |                         |
| Chemicals | S4162 | <chem>c1cc(OCCOCC[N+](C)(C)Cc2ccccc2)ccc1C(C)(C)CC(C)(C)C.[Cl-]</chem>                                                                            | C27H42ClNO2    | 448.081 | Benzethonium Chloride   |
| Selleck   |       |                                                                                                                                                   |                |         |                         |
| Chemicals | S4258 | <chem>c1(ccc(Cl)cc1Cl)[C@@H]2CSC(=C(C#N)n3cncc3)S2</chem>                                                                                         | C14H9Cl2N3S2   | 354.277 | Luliconazole            |
| Selleck   |       |                                                                                                                                                   |                |         |                         |
| Chemicals | S4171 | <chem>C(CO)[N+](C)(C)C.[Cl-]</chem>                                                                                                               | C5H14ClNO      | 139.624 | Choline Chloride        |
| Selleck   |       |                                                                                                                                                   |                |         |                         |
| Chemicals | S4267 | <chem>c(C(=O)c1c(cccc1OC(C)=O)C2=O)(c(C(=O)C)cc(C(=O)O)c3)c23C(C(=O)OC)(C(c1cccc([N+](=[O-]))=O)c1)C(C(=O)OCCN(C)Cc2ccccc2)=C(C)N3)=C3C.Cl</chem> | C19H12O8       | 368.294 | Diacerein               |
| Selleck   |       |                                                                                                                                                   |                |         |                         |
| Chemicals | S4181 | <chem>c1cc([C@@H](N)C(=O)N[C@H]2[C@@]3([H])N([C@@H](C(=O)O)C(C)(C)S3)C2=O)cc1.O.O.O</chem>                                                        | C26H30ClN3O6   | 515.986 | Nicardipine HCl         |
| Selleck   |       |                                                                                                                                                   |                |         |                         |
| Chemicals | S4279 | <chem>c1c(Cl)c2c(C(=O)C(=C3O)[C@]([H])([C@]4([H])[C@@]3(O)C(=O)C(C(=O)N)=C(O)[C@@H]4N(C)C)[C@H]2O)c(O)c1.Cl</chem>                                | C21H22Cl2N2O8  | 501.314 | Demeclocycline HCl      |
| Selleck   |       |                                                                                                                                                   |                |         |                         |
| Chemicals | S4190 | <chem>n1c(c2c(C(O)=O)cc1c3ccccc3)cccc2</chem>                                                                                                     | C16H11NO2      | 249.264 | Cinchophen              |
| Selleck   |       |                                                                                                                                                   |                |         |                         |
| Chemicals | S4291 | <chem>c1(C(=O)N)cc(C(O)CNC(C)CCc2ccccc2)ccc1O.Cl</chem>                                                                                           | C19H25ClN2O3   | 364.866 | Labetalol HCl           |
| Selleck   |       |                                                                                                                                                   |                |         |                         |
| Chemicals | S4199 | <chem>c1ccc(CN(c2ccccc2)CC3=NCCN3)cc1.Cl</chem>                                                                                                   | C17H20ClN3     | 301.814 | Antazoline HCl          |
| Selleck   |       |                                                                                                                                                   |                |         |                         |
| Chemicals | S4627 | <chem>c(C(C)(C)CCC1(C)C)(cc(C(C)=Cc2ccc(C(=O)O)cc2)cc3)c13</chem>                                                                                 | C24H28O2       | 348.478 | TTNPB (Arotinoid Acid)  |
| Selleck   |       |                                                                                                                                                   |                |         |                         |
| Chemicals | S4208 | <chem>c1cc2c(OC(C(=O)O)=CC2=O)cc1</chem>                                                                                                          | C10H6O4        | 190.152 | Chromocarb              |
| Selleck   |       |                                                                                                                                                   |                |         |                         |
| Chemicals | S4926 | <chem>c1(F)cc2c(CC[C@@H](N3C(=S)NC=C3CN)C2)c(F)c1.Cl</chem>                                                                                       | C14H16ClF2N3S  | 331.812 | (R)-Nepicastat HCl      |
| Selleck   |       |                                                                                                                                                   |                |         |                         |
| Chemicals | S4219 | <chem>N1(CCN(CCCC(=O)c2ccc(F)cc2)CC1)c3ncccc3</chem>                                                                                              | C19H22FN3O     | 327.396 | Azaperone               |
| Selleck   |       |                                                                                                                                                   |                |         |                         |
| Chemicals | S7018 | <chem>c1(S(NC(C)C)C)(=O)=O)cc(c2cn(c3c(F)c2)nc(N)n3)cnc1</chem>                                                                                   | C15H17FN6O2S   | 364.398 | CZC24832                |
| Selleck   |       |                                                                                                                                                   |                |         |                         |
| Chemicals | S4228 | <chem>[C@](F)([C@]1(C)C(=CC(=O)C=C1)[C@@]([H])(C)C2)[C@](O)([H])C[C@@]3(C)[C@@]4([H])CC[C@@]3(C(=O)C)OC(=O)C[C@@]24[H]</chem>                     | C24H31FO5      | 418.498 | Fluorometholone Acetate |
| Selleck   |       |                                                                                                                                                   |                |         |                         |
| Chemicals | S7037 | <chem>n1ccc(c2ccc(CC(=O)Nc3ccc(c4cnccc4)cc3)cc2)cc1C</chem>                                                                                       | C25H21N3O      | 379.454 | Wnt-C59 (C59)           |

|           |       |                                                                               |                |          |                                        |
|-----------|-------|-------------------------------------------------------------------------------|----------------|----------|----------------------------------------|
| Selleck   |       | <chem>c1(OC)cc2c([C@@]3([H])N(C)CC2)cc1Oc(c45)[C@]([H])(N(C)CC4)Cc(cc</chem>  |                |          |                                        |
| Chemicals | S4238 | <chem>c6Oc7cc(ccc7OC)C3)cc6)c8c(OCO8)c5</chem>                                | C37H38N2O6     | 606.707  | Cepharanthine                          |
| Selleck   |       | <chem>c1(OC(F)(F)O2)c2cc(C3(CC3)C(Nc4cc5c(n(C[C@@H](O)CO)c(C(C)(C)CO</chem>   |                |          |                                        |
| Chemicals | S7059 | <chem>)c5)cc4F)=O)cc1</chem>                                                  | C26H27F3N2O6   | 520.498  | VX-661                                 |
| Selleck   |       |                                                                               |                |          |                                        |
| Chemicals | S4248 | <chem>[Na+].[C]([O-])=O)Cc1cccc(C(=O)c2ccc(Br)cc2)c1N</chem>                  | C15H11BrNNaO3  | 356.147  | Bromfenac Sodium                       |
| Selleck   |       | <chem>N1(C)[C@@H](C(C)C)C(=O)N[C@@H](CCCC(N)=N)C(=O)NCC(=O)N[C</chem>         |                |          |                                        |
| Chemicals | S7077 | <chem>@@H](CC(O)=O)C(=O)N[C@H](Cc2ccccc2)C1=O</chem>                          | C27H40N8O7     | 588.656  | Cilengitide                            |
| Selleck   |       |                                                                               |                |          |                                        |
| Chemicals | S3129 | <chem>c1(N)ccc(Cc2cc(OC)c(OC)c(OC)c2)c(N)n1</chem>                            | C14H18N4O3     | 290.318  | Trimethoprim                           |
| Selleck   |       |                                                                               |                |          |                                        |
| Chemicals | S4047 | <chem>c1(C(c2ccc(OC(C)=O)cc2)c3ncccc3)ccc(OC(C)=O)cc1</chem>                  | C22H19NO4      | 361.391  | Bisacodyl                              |
| Selleck   |       |                                                                               |                |          |                                        |
| Chemicals | S3144 | <chem>c1(CCN2C[C@H](C(c3ccccc3))(c4ccccc4)C(N)=O)CC2)cc5c(OCC5)cc1.Br</chem>  | C28H31BrN2O2   | 507.462  | Darifenacin HBr                        |
| Selleck   |       |                                                                               |                |          |                                        |
| Chemicals | S4057 | <chem>c1(S(N)(=O)=O)cc2c(NC(C)N(C)S2(=O)=O)cc1Cl</chem>                       | C9H11Cl2N3O4S2 | 360.237  | Methyclothiazide                       |
| Selleck   |       | <chem>C1C[C@@]2([H])C(C[C@]3([H])[C@@]2([H])CC[C@@]4(C)[C@@]3([H]</chem>      |                |          |                                        |
| Chemicals | S3160 | <chem>)CC[C@]4(O)C(C)=O)C#C)=C[C@H]1O(C(C)=O</chem>                           | C24H32O4       | 384.508  | Ethynodiol diacetate                   |
| Selleck   |       |                                                                               |                |          |                                        |
| Chemicals | S4071 | <chem>c1c(OC)c2c(O[C@]3(C(OC)=CC(=O)C[C@H]3C)C2=O)c(Cl)c1OC</chem>            | C17H17ClO6     | 352.766  | Griseofulvin                           |
| Selleck   |       |                                                                               |                |          |                                        |
| Chemicals | S3176 | <chem>c1(CCNC)ncccc1.Cl.Cl</chem>                                             | C8H14Cl2N2     | 209.116  | Bethahistine 2HCl                      |
| Selleck   |       |                                                                               |                |          |                                        |
| Chemicals | S4080 | <chem>c1(N)nc(N)c2c(nc(N)c(c3ccccc3)n2)n1</chem>                              | C12H11N7       | 253.263  | Triamterene                            |
| Selleck   |       |                                                                               |                |          |                                        |
| Chemicals | S3190 | <chem>OC[C@H]1O[C@@H](n2c(c3nc2)ncnc3NC)[C@H](O)[C@@H]1O</chem>               | C11H15N5O4     | 281.268  | N6-methyladenosine<br>(m6A)            |
| Selleck   |       |                                                                               |                |          |                                        |
| Chemicals | S4090 | <chem>c1c(CCN2CCC3(OC(=O)NC3)CC2)cccc1.Cl</chem>                              | C15H21ClN2O2   | 296.792  | Fenspiride HCl                         |
| Selleck   |       | <chem>C1(C(O)(c2ccccc2)c3ccccc3)CCN(CCC(C)O)c4ccc(C(C)(C)C(=O)O)cc4)CC</chem> |                |          |                                        |
| Chemicals | S3208 | <chem>1.Cl</chem>                                                             | C32H40ClNO4    | 538.117  | Fexofenadine HCl                       |
| Selleck   |       |                                                                               |                |          |                                        |
| Chemicals | S4100 | <chem>c1cc(OCC(O)CNC(C)C)ccc1CCC(=O)OC.Cl</chem>                              | C16H26ClNO4    | 331.835  | Esmolol HCl                            |
| Selleck   |       | <chem>Cl.c1cc2c(C(=O)C(=C3O)[C@]([H])([C@@H](O)[C@]4([H])[C@@]3(O)C(</chem>   |                |          |                                        |
| Chemicals | S4005 | <chem>=O)C(C(=O)N)=C(O)[C@@H]4N(C)C)[C@@H]2C)c(O)c1</chem>                    | C22H25ClN2O8   | 480.895  | Doxycycline HCl                        |
| Selleck   |       | <chem>c1cc2c(CC[C@]3([H])[C@@]2([H])CC[C@@]4(C)[C@@]3([H])CC[C@H]4</chem>     |                |          |                                        |
| Chemicals | S4110 | <chem>O)cc1OC(=O)c5ccccc5</chem>                                              | C25H28O3       | 376.488  | Estradiol Benzoate                     |
| Selleck   |       | <chem>[C@@]1(CO)[C@@H](O)C[C@@H](O)[C@@H]2O[C@H](C)[C@H](O)[C</chem>          |                |          |                                        |
| Chemicals | S4016 | <chem>@@H](O)[C@@H]2O)C3)[C@]3(O)CC[C@]4([H])[C@@]1([C@H](O)C[C</chem>        |                |          |                                        |
|           |       | <chem>@@]5(C)[C@]4(O)CC[C@H]5C6=CC(=O)OC6)[H].O.O.O.O.O.O.O</chem>            | C29H60O20      | 728.775  | Ouabain                                |
|           |       | <chem>[C@@H]1(O)[C@@H]2O[C@@H](C)[C@@H](O)[C@H](N(C)O)[C@H]2O)</chem>         |                |          |                                        |
|           |       | <chem>[C@@H](C)[C@H](O)CC(=O)O[C@H](CC)[C@H](CO[C@@H]3O[C@@</chem>            |                |          |                                        |
| Selleck   |       | <chem>H](C)[C@@H](O)[C@@H](O)C[C@H]3OC)C=C(C)C=CC(=O)[C@H](C)C</chem>         |                |          |                                        |
| Chemicals | S4122 | <chem>C@@H]1CCN4C[C@H](C)C[C@@H](C)C4</chem>                                  | C46H80N2O13    | 869.133  | Tilmicosin                             |
| Selleck   |       |                                                                               |                |          |                                        |
| Chemicals | S4025 | <chem>[C@@H]1(O(C(=O)C(O)c2ccccc2)C[C@]3([H])N(C)[C@]([H])(CC3)C1.Br</chem>   | C16H22BrNO3    | 356.255  | Homatropine Bromide                    |
| Selleck   |       |                                                                               |                |          |                                        |
| Chemicals | S4136 | <chem>OC(=O)C(C)c1cc2c(c3c(ccc(Cl)c3)[nH]2)cc1</chem>                         | C15H12ClNO2    | 273.714  | Carprofen                              |
| Selleck   |       |                                                                               |                |          |                                        |
| Chemicals | S4039 | <chem>C1(=NC(=O)C)N(C)N=C(S(=O)(=O)N)S1</chem>                                | C5H8N4O3S2     | 236.272  | Methazolamide                          |
| Selleck   |       |                                                                               |                |          |                                        |
| Chemicals | S4149 | <chem>c1(cccc(C([O-])=O)c1N)C(=O)c2ccccc2.O.[Na+]</chem>                      | C15H14NNaO4    | 295.266  | Amfenac Sodium<br>Monohydrate          |
|           |       | <chem>c1c(O)c2c([C@H](C)[C@]3([H])C(=C(O)[C@@]4(O)[C@]([H])([C@H](N(C</chem>  |                |          |                                        |
| Selleck   |       | <chem>)C(C)O)=C(C(N)=O)C4=O)[C@H]3O)C2=O)cc1.c5c(O)c6c([C@H](C)[C@</chem>     |                |          |                                        |
| Chemicals | S4163 | <chem>]7([H])C(=C(O)[C@@]8(O)[C@]([H])([C@H](N(C)C)C(O)=C(C(N)=O)C8=</chem>   |                |          |                                        |
| Selleck   |       | <chem>O)[C@H]7O)C6=O)cc5.Cl.O.CCO.Cl</chem>                                   | C46H58Cl2N4O18 | 1025.875 | Doxycycline Hyclate                    |
| Chemicals | S4259 | <chem>c(cc(C#N)cc1)c(CCCCN2CCN(c3ccc4c(cc(C(=O)N)O4)c3)CC2)c[nH]5)c15.</chem> |                |          |                                        |
| Selleck   |       | <chem>Cl</chem>                                                               | C26H28ClN5O2   | 477.986  | Vilazodone HCl                         |
| Selleck   |       |                                                                               |                |          |                                        |
| Chemicals | S4172 | <chem>[n+].[1](CCCCCCCCCCCCCCCC)cccc1.[Cl-]</chem>                            | C21H38ClN      | 339.986  | Cetylpyridinium Chloride               |
| Selleck   |       |                                                                               |                |          |                                        |
| Chemicals | S4268 | <chem>C(O)(=O)c1cccc1Nc2ccc(C(F)(F)F)c2</chem>                                | C14H10F3NO2    | 281.23   | Flufenamic acid                        |
| Selleck   |       |                                                                               |                |          |                                        |
| Chemicals | S4182 | <chem>c1cc(C=NCC(=O)c2ccc(O)cc2)oc1[N+](=O)[O-]</chem>                        | C12H9N3O5      | 275.217  | Nifuroxazide                           |
| Selleck   |       |                                                                               |                |          |                                        |
| Chemicals | S4280 | <chem>c1cc(OCC(=O)OCCN(C)C)ccc1Cl.Cl</chem>                                   | C12H17Cl2NO3   | 294.174  | Meclofenoxate<br>(Centrophenoxine) HCl |
| Selleck   |       |                                                                               |                |          |                                        |
| Chemicals | S4191 | <chem>c1ccccc1C(=O)NCCC(=O)O</chem>                                           | C10H11NO3      | 193.199  | Betamipron                             |

|           |       |                                                                                                                              |                  |         |                                    |
|-----------|-------|------------------------------------------------------------------------------------------------------------------------------|------------------|---------|------------------------------------|
| Selleck   |       |                                                                                                                              |                  |         |                                    |
| Chemicals | S4292 | <chem>c1cc(C(O)(c2ccccc2)CCCN3CCCCC3)ccc1.Cl</chem>                                                                          | C21H28ClNO       | 345.906 | Diphenidol HCl                     |
| Selleck   |       |                                                                                                                              |                  |         |                                    |
| Chemicals | S4200 | <chem>c1cc(C(=O)C(C)CN2CCCCC2)ccc1C.Cl</chem>                                                                                | C16H24ClNO       | 281.821 | Tolperisone HCl                    |
| Selleck   |       |                                                                                                                              |                  |         |                                    |
| Chemicals | S4900 | <chem>CC(c1ccc(C(NC(Nc2ccc(NC(CCCCN(C)C)=O)cc2)=S)=O)cc1)(C)C</chem>                                                         | C25H34N4O2S      | 454.628 | Tenovin-6                          |
| Selleck   |       |                                                                                                                              |                  |         |                                    |
| Chemicals | S4209 | <chem>c1(C)cc(O)ccc1Cl</chem>                                                                                                | C7H7ClO          | 142.583 | Chlorocresol                       |
| Selleck   |       | <chem>n1c(N([C@@H]2[C@@H](C)CCN(C(CCN)=O)C2)c3c([nH]cc3)nc1.C(C(=O)O)C(C)(CC(O)=O)C(=O)O</chem>                              | C22H28N6O8       | 504.493 | Tofacitinib (CP-690550)<br>Citrate |
| Chemicals | S5001 | <chem>n1c(NS(=O)(=O)c2ccc(C(C)(C)C)cc2)c(Oc3c(O)cccc3)c(OCCO)nc1c4ncc</chem>                                                 |                  |         |                                    |
| Selleck   |       | <chem>cn4</chem>                                                                                                             | C27H29N5O6S      | 551.614 | Bosentan                           |
| Chemicals | S4220 | <chem>C(C)(C)[C@H](NC(=O)OCc1ccccc1)C(=O)N[C@@H](C)C(N[C@H](C)CF)=O)CC(=O)OC(=O)</chem>                                      | C22H30FN3O7      | 467.488 | Z-VAD-FMK                          |
| Selleck   |       |                                                                                                                              |                  |         |                                    |
| Chemicals | S7023 | <chem>c1(C(=O)OCCN(CC)CC)ccc(N)c(OCCCC)c1.Cl</chem>                                                                          | C17H29ClN2O3     | 344.877 | Oxybuprocaine HCl                  |
| Selleck   |       |                                                                                                                              |                  |         |                                    |
| Chemicals | S4229 | <chem>c1(C(=O)OCCN(CC)CC)ccc(N)c(OCCCC)c1.Cl</chem>                                                                          | C17H29ClN2O3     | 344.877 | Oxybuprocaine HCl                  |
| Selleck   |       |                                                                                                                              |                  |         |                                    |
| Chemicals | S7039 | <chem>c1cc2c(c(Nc3cc(Br)ccc3)ncn2)cc1NC(=O)C=C</chem>                                                                        | C17H13BrN4O      | 369.215 | PD168393                           |
| Selleck   |       |                                                                                                                              |                  |         |                                    |
| Chemicals | S4239 | <chem>C1=Cc2c(cc3c(ccc3)c2OC)OC1=O</chem>                                                                                    | C12H8O4          | 216.19  | Bergapten                          |
| Selleck   |       |                                                                                                                              |                  |         |                                    |
| Chemicals | S7060 | <chem>n1c(N)c2c(n(C(C)C)nc2c3ccc(C)cc3)nc1</chem>                                                                            | C16H19N5         | 281.356 | PP1                                |
| Selleck   |       |                                                                                                                              |                  |         |                                    |
| Chemicals | S4249 | <chem>c1(C(=O)CC)c(O)cc(O)cc1O</chem>                                                                                        | C9H10O4          | 182.173 | Flopropione                        |
| Selleck   |       | <chem>c1(C(C)C)ccc(NC(NCCCN(C(C)C)C@H)2O[C@@H](n3cc(Br)c4c3ncnc4N)[C@H](O)[C@@H]2O)C(C)C(=O)O)cc1</chem>                     | C28H40BrN7O4     | 618.566 | SGC 0946                           |
| Chemicals | S7079 |                                                                                                                              |                  |         |                                    |
| Selleck   |       |                                                                                                                              |                  |         |                                    |
| Chemicals | S3130 | <chem>C1(=O)N[C@@H]2[C@H](C)[C@@H](CS[C@@H]2CCCCC(=O)O)N1</chem>                                                             | C10H16N2O3S      | 244.311 | Biotin (Vitamin B7)                |
| Selleck   |       |                                                                                                                              |                  |         |                                    |
| Chemicals | S4048 | <chem>C1=CN(C)C(=S)N1C(OCC)=O</chem>                                                                                         | C7H10N2O2S       | 186.232 | Carbimazole                        |
| Selleck   |       |                                                                                                                              |                  |         |                                    |
| Chemicals | S3146 | <chem>C(N(C)C)CN(Cc1ccccc1)c2ncccc2.Cl</chem>                                                                                | C16H22ClN3       | 291.819 | Tripelennamine HCl                 |
| Selleck   |       |                                                                                                                              |                  |         |                                    |
| Chemicals | S4059 | <chem>[Fe](N=O)(C#N)(C#N)(C#N)(C#N)C#N.[Na+].[Na+].[R]</chem>                                                                | C5FeN6Na2OR      | 261.918 | Sodium Nitroprusside               |
| Selleck   |       |                                                                                                                              |                  |         |                                    |
| Chemicals | S3161 | <chem>c1n(CC(OCC2csc3c2cccc3Cl)c4ccc(Cl)cc4Cl)ccn1.[R]</chem>                                                                | C20H15Cl3N2ORS   | 437.77  | Sertaconazole nitrate              |
| Selleck   |       |                                                                                                                              |                  |         |                                    |
| Chemicals | S4072 | <chem>[N+](C)(C)CCCCCCCC[N+](C)(C)C.[Br-].[Br-]</chem>                                                                       | C16H38Br2N2      | 418.294 | Decamethonium Bromide              |
| Selleck   |       |                                                                                                                              |                  |         |                                    |
| Chemicals | S3178 | <chem>S1(=O)(=O)c2c(cc(S(N)=O)=O)s2[C@@H](NCC)CN1CCCC</chem>                                                                 | C12H21N3O5S3     | 383.507 | Brinzolamide                       |
| Selleck   |       |                                                                                                                              |                  |         |                                    |
| Chemicals | S4081 | <chem>c1cc(S(=O)(=O)[N-]C(=O)C)ccc1N.[Na+]</chem>                                                                            | C8H9N2NaO3S      | 236.223 | Sulfacetamide Sodium               |
| Selleck   |       | <chem>N1(C2SC(C)C1C(O)=O)C(=O)C2NC([C@H](C(O)=O)c3ccsc3)=O.[Na].[Na]</chem>                                                  |                  |         |                                    |
| Chemicals | S3193 | <chem>c1(O)ccc(C(O)C(C)N2CCC(Cc3ccccc3)CC2)cc1.c4(O)ccc(C(O)C(C)N5CCC(Cc6ccccc6)CC5)cc4.C(=O)O[C@H](O)[C@@H](O)C(=O)O</chem> | C15H16N2Na2O6S2  | 430.407 | Ticarcillin sodium                 |
| Selleck   |       |                                                                                                                              |                  |         |                                    |
| Chemicals | S4091 | <chem>(Cc6ccccc6)CC5)cc4.C(=O)O[C@H](O)[C@@H](O)C(=O)O</chem>                                                                | C46H60N2O10      | 800.976 | Ifenprodil Tartrate                |
| Selleck   |       |                                                                                                                              |                  |         |                                    |
| Chemicals | S3209 | <chem>N1(C)C(C)=C(N(C)C)C(=O)N1c2ccccc2</chem>                                                                               | C13H17N3O        | 231.294 | Amidopyrine                        |
| Selleck   |       |                                                                                                                              |                  |         |                                    |
| Chemicals | S4101 | <chem>[C@@H]1(O)[C@@](CO)(CO)C[C@H](NC(CO)CO)[C@H](O)[C@H]1O</chem>                                                          | C10H21NO7        | 267.276 | Voglibose                          |
| Selleck   |       |                                                                                                                              |                  |         |                                    |
| Chemicals | S4007 | <chem>c1(C(=N)N)ccc(OCCCCO)c2ccc(C(=N)N)cc2)cc1.Cl.Cl</chem>                                                                 | C19H26Cl2N4O2    | 413.341 | Pentamidine                        |
| Selleck   |       | <chem>c1(c2c(C(=O)N[C@H]3[C@H]4N([C@@H](C(O[Na])=O)C(C)(C)S4)C3=O)c(C)on2)c(Cl)cccc1Cl.O</chem>                              | C19H18Cl2N3NaO6S | 510.323 | Dicloxacillin Sodium               |
| Chemicals | S4111 |                                                                                                                              |                  |         |                                    |
| Selleck   |       |                                                                                                                              |                  |         |                                    |
| Chemicals | S4017 | <chem>N(CC=C)C(=S)N</chem>                                                                                                   | C4H8N2S          | 116.185 | Allylthiourea                      |
| Selleck   |       |                                                                                                                              |                  |         |                                    |
| Chemicals | S4123 | <chem>c1(N2CCOCC2)nsnc1OC[C@@H](O)CNC(C)(C)C.C(C(=O)O)=CC(=O)O</chem>                                                        | C17H28N4O7S      | 432.492 | Timolol Maleate                    |
| Selleck   |       |                                                                                                                              |                  |         |                                    |
| Chemicals | S4026 | <chem>C(c1ccccc1)(c2ccc(Cl)cc2)N3CCN(CCOCCO)CC3.Cl.Cl</chem>                                                                 | C21H29Cl3N2O2    | 447.826 | Hydroxyzine 2HCl                   |
| Selleck   |       |                                                                                                                              |                  |         |                                    |
| Chemicals | S4138 | <chem>N1(CCN(CC(O)CO)CC1)c2ccccc2</chem>                                                                                     | C13H20N2O2       | 236.31  | Dropropizine                       |
| Selleck   |       | <chem>[C@@]([H])([C@@]1([H])[C@]([H])([C@]2([H])C=CC(=O)CC2)CC1)CC3(C)[C@]([H])([H])C#C)[C@]34C</chem>                       | C20H26O2         | 298.419 | Norethindrone                      |
| Chemicals | S4040 |                                                                                                                              |                  |         |                                    |
| Selleck   |       |                                                                                                                              |                  |         |                                    |
| Chemicals | S4151 | <chem>c1(ccc(Cl)c(C(F)(F)F)c1)C2(O)CCN(CCCC(c3ccc(F)cc3)c4ccc(F)cc4)CC2</chem>                                               | C28H27ClF5NO     | 523.965 | Penfluridol                        |
| Selleck   |       |                                                                                                                              |                  |         |                                    |
| Chemicals | S4164 | <chem>N1(C)C(=O)c2c(ncn2CC3OCCO3)N(C)C1=O</chem>                                                                             | C11H14N4O4       | 266.253 | Doxofylline                        |

|           |       |                                                                                                                                                                                                                                                                             |                |          |                          |
|-----------|-------|-----------------------------------------------------------------------------------------------------------------------------------------------------------------------------------------------------------------------------------------------------------------------------|----------------|----------|--------------------------|
| Selleck   |       |                                                                                                                                                                                                                                                                             |                |          |                          |
| Chemicals | S4260 | <chem>c(C(C)(C)CCC1(C)C)(ccc(NC(=O)c2ccc(C(=O)O)cc2)c3)c13</chem>                                                                                                                                                                                                           | C22H25NO3      | 351.439  | Tamibarotene             |
| Selleck   |       |                                                                                                                                                                                                                                                                             |                |          |                          |
| Chemicals | S4173 | <chem>C(CCCCCCCC)CCCCCCCCO</chem>                                                                                                                                                                                                                                           | C16H34O        | 242.441  | 1-Hexadecanol            |
|           |       | <chem>c1([C@]2(C(=O)O)C)c3c(c4c(cccc4)[nH]3)CN(CC5C2)CC(CC)=C5)cc6c(N(C)[C@]7([H])[C@]6(CC8)[C@]([H])(N89)[C@](CC)(C=CC9)[C@@H](OC(=O)C)[C@]7(O)C(=O)O)cc1OC.C(=O)O)[C@H](O)[C@@H](O)C(=O)O.C(=O)O)[C@H](O)[C@@H](O)C(=O)O</chem>                                           | C53H66N4O20    | 1079.106 | Vinorelbine Tartrate     |
| Selleck   | S4269 |                                                                                                                                                                                                                                                                             |                |          |                          |
| Chemicals | S4184 | <chem>N(C(=O)c1c(n(CCC(CO)CO)cn1)N2)=C2N</chem>                                                                                                                                                                                                                             | C10H15N5O3     | 253.258  | Penciclovir              |
| Selleck   |       | <chem>C1C[C@]2([H])[C@@]([H])(CN(C[C@H](O)[C@H](CSc3ccccc3)NC(=O)c4ccccc(O)c4C)[C@H](C(=O)N(C)C)C2)CC1.OS(=O)(=O)C</chem>                                                                                                                                                   | C33H49N3O7S2   | 663.888  | Nelfinavir Mesylate      |
| Chemicals | S4282 |                                                                                                                                                                                                                                                                             |                |          |                          |
| Selleck   |       |                                                                                                                                                                                                                                                                             |                |          |                          |
| Chemicals | S4192 | <chem>n1c(c2ccc1C)c(O)c(Cl)cc2Cl</chem>                                                                                                                                                                                                                                     | C10H7Cl2NO     | 228.075  | Chlorquinaldol           |
| Selleck   |       |                                                                                                                                                                                                                                                                             |                |          |                          |
| Chemicals | S4293 | <chem>c1cc2c(N(CC(N(C)C)C)c3c(cccc3)S2)cc1.Cl</chem>                                                                                                                                                                                                                        | C17H21ClN2S    | 320.88   | Promethazine HCl         |
| Selleck   |       |                                                                                                                                                                                                                                                                             |                |          |                          |
| Chemicals | S4201 | <chem>c1(S(=O)(=O)C)ccc([C@@H](O)[C@@H](CF)NC(=O)C(Cl)Cl)cc1</chem>                                                                                                                                                                                                         | C12H14Cl2FNO4S | 358.213  | Florfenicol              |
| Selleck   |       | <chem>C(Nc1ccc(Nc2nccc(c3ccccc3)n2)c(C)c1)=O)c4cccc(NC(=O)C=CCN(C)C)c4</chem>                                                                                                                                                                                               | C29H29N7O2     | 507.586  | JNK-IN-8                 |
| Chemicals | S4901 |                                                                                                                                                                                                                                                                             |                |          |                          |
| Selleck   |       |                                                                                                                                                                                                                                                                             |                |          |                          |
| Chemicals | S4210 | <chem>c1(N)ccc(C(OCC)=O)cc1</chem>                                                                                                                                                                                                                                          | C9H11NO2       | 165.189  | Benzocaine               |
| Selleck   |       |                                                                                                                                                                                                                                                                             |                |          |                          |
| Chemicals | S7000 | <chem>c1(Nc2ccc(N3CC(C(N(C)C)CC3)cc2O)C)nc(Cl)c(Nc4ccccc4P(C)(C)=O)n1</chem>                                                                                                                                                                                                | C26H34ClN6O2P  | 529.014  | AP26113                  |
| Selleck   |       |                                                                                                                                                                                                                                                                             |                |          |                          |
| Chemicals | S4221 | <chem>c1(C(=O)c2cc(Br)c(O)c(Br)c2)c(CC)oc3c1cccc3</chem>                                                                                                                                                                                                                    | C17H12Br2O3    | 424.083  | Benzbromarone            |
| Selleck   |       |                                                                                                                                                                                                                                                                             |                |          |                          |
| Chemicals | S7024 | <chem>c1([N+]([O-])=O)cc2c(C=CS2(=O)=O)cc1</chem>                                                                                                                                                                                                                           | C8H5NO4S       | 211.195  | Stattic                  |
| Selleck   |       |                                                                                                                                                                                                                                                                             |                |          |                          |
| Chemicals | S4230 | <chem>c1(c2ccccc2)oc(CCC(O)=O)nc1c3ccccc3</chem>                                                                                                                                                                                                                            | C18H15NO3      | 293.317  | Oxaprozin                |
| Selleck   |       | <chem>c1cc(OCCN2CCN(C(=O)C)CC2)ccc1C3CCN(C4=N5c(nnc5C(F)(F)F)CC4)CC3</chem>                                                                                                                                                                                                 | C25H32F3N7O2   | 519.562  | AZD3514                  |
| Chemicals | S7040 |                                                                                                                                                                                                                                                                             |                |          |                          |
| Selleck   |       |                                                                                                                                                                                                                                                                             |                |          |                          |
| Chemicals | S4240 | <chem>c1cccc(C(OCCN(C)C)(C)c2ncccc2)c1.C(O)(=O)CCC(O)=O</chem>                                                                                                                                                                                                              | C21H28N2O5     | 388.457  | Doxylamine Succinate     |
| Selleck   |       | <chem>N([C@H]1C[C@@H](CCc2[nH]c3c(cc(C(C)(C)cc3)n2)C1)[C[C@H]4O[C@@H]([n5cnc6c5nnc6N])[C@H](O)[C@@H]4O)C(C)C</chem>                                                                                                                                                         | C30H42N8O3     | 562.706  | EPZ5676                  |
| Chemicals | S7062 |                                                                                                                                                                                                                                                                             |                |          |                          |
| Selleck   |       |                                                                                                                                                                                                                                                                             |                |          |                          |
| Chemicals | S4250 | <chem>c1(S(Nc2nnc(OC)cc2)(=O)=O)ccc(N)cc1</chem>                                                                                                                                                                                                                            | C11H12N4O3S    | 280.303  | Sulfamethoxypyridazine   |
| Selleck   |       | <chem>c1ccc(Nc2nc(Nc3cc(C)c(C4CCNCCC4)cc3OC(C)C)ncc2Cl)c(S(=O)(=O)C(C)C)c1</chem>                                                                                                                                                                                           | C28H36ClN5O3S  | 558.135  | LDK378                   |
| Chemicals | S7083 |                                                                                                                                                                                                                                                                             |                |          |                          |
| Selleck   |       |                                                                                                                                                                                                                                                                             |                |          |                          |
| Chemicals | S3132 | <chem>c1(S(Nc2nccc(C)n2)(=O)=O)ccc(N)cc1</chem>                                                                                                                                                                                                                             | C11H12N4O2S    | 264.304  | Sulfamerazine            |
| Selleck   |       |                                                                                                                                                                                                                                                                             |                |          |                          |
| Chemicals | S4049 | <chem>c1cc(c2c(c3ccc(S(=O)(=O)N)cc3)c(C)on2)ccc1</chem>                                                                                                                                                                                                                     | C16H14N2O3S    | 314.359  | Valdecoxib               |
| Selleck   |       |                                                                                                                                                                                                                                                                             |                |          |                          |
| Chemicals | S3147 | <chem>C(N(CC)CC)(C(=O)C(C#N)=Cc1cc([N+]([O-])=O)c(O)c(O)c1</chem>                                                                                                                                                                                                           | C14H15N3O5     | 305.286  | Entacapone               |
| Selleck   |       |                                                                                                                                                                                                                                                                             |                |          |                          |
| Chemicals | S4062 | <chem>c1([N+]([O-])=O)cncc(COC(=O)N)n1C</chem>                                                                                                                                                                                                                              | C6H8N4O4       | 200.152  | Ronidazole               |
|           |       | <chem>[C@H]1[CO][C@@H]2O[C@H](C)[C@@H](O)[C@@H](OC)[C@H]2OC)C=C(C)C=CC(=O)[C@H](C)C[C@H](CC=O)[C@H](O)[C@@]3([H])O[C@H](C)[C@@H](O)[C@@]4([H])C[C@]([O])(C)[C@@H](O)[C@H](C)O4)[C@H](N(C)C)[C@H]3O)[C@@H](C)[C@H](O)CC(=O)O[C@@H]1CC.C(O)(=O)[C@H](O)[C@@H](O)C(O)=O</chem> | C50H83NO23     | 1066.187 | Tylosin tartrate         |
| Selleck   | S3162 |                                                                                                                                                                                                                                                                             |                |          |                          |
| Selleck   |       |                                                                                                                                                                                                                                                                             |                |          |                          |
| Chemicals | S4073 | <chem>[O-]C(=O)c1ccc(N)cc1O.[Na+]</chem>                                                                                                                                                                                                                                    | C7H6NNaO3      | 175.117  | Sodium 4-Aminosalicylate |
| Selleck   |       | <chem>N1([C@]2([H])SC(C)(C)[C@@H]1C([O-])=O)C(=O)[C@H]2NC(C(C([O-])=O)c3ccccc3)=O.[Na+].[Na+]</chem>                                                                                                                                                                        | C17H16N2Na2O6S | 422.363  | Carbenicillin disodium   |
| Chemicals | S3179 |                                                                                                                                                                                                                                                                             |                |          |                          |
|           |       | <chem>C1C=CC=C[C@H](O)[C@H]2CC[C@H](N(C)C)[C@H](C)O2)[C@H](C)C[C@@H](CC=O)[C@H](O)[C@H]3O[C@@H](C)[C@H](O)[C@H]4O[C@H](C)[C@@H](O)[C@@]([C](O)C4)[C@@H](N(C)C)[C@@H]3O)[C@H](OC)[C@H](O)CC(=O)O[C@@H]1C</chem>                                                              | C43H74N2O14    | 843.053  | Spiramycin               |
| Selleck   | S4082 |                                                                                                                                                                                                                                                                             |                |          |                          |
| Selleck   |       | <chem>N1(C2SC(C)(C)C1C(O)=O)C(=O)C2NC([C@H](NC(N3C(=O)NCC3)=O)c4cccc4)=O.[Na]</chem>                                                                                                                                                                                        | C20H23N5NaO6S  | 484.481  | Azlocillin sodium salt   |
| Chemicals | S3195 |                                                                                                                                                                                                                                                                             |                |          |                          |
| Selleck   |       |                                                                                                                                                                                                                                                                             |                |          |                          |
| Chemicals | S4092 | <chem>Cl.c1cc(OCCCN2CCOCC2)ccc1OCCCC</chem>                                                                                                                                                                                                                                 | C17H28ClNO3    | 329.862  | Pramoxine HCl            |
| Selleck   |       | <chem>c1(c(OC)c2c(OCO2)c3)c3[C@H](C)[C@H](C)Cc4c1c(OC)c(OC)c(OC)c4</chem>                                                                                                                                                                                                   | C23H28O6       | 400.465  | Schisandrin B (Sch B)    |
| Chemicals | S3600 |                                                                                                                                                                                                                                                                             |                |          |                          |

|           |       |                                                                                                                |                             |         |                                                         |
|-----------|-------|----------------------------------------------------------------------------------------------------------------|-----------------------------|---------|---------------------------------------------------------|
| Selleck   |       | <chem>c1cc(Cn2c(CCCC)nc2C=C(Cc3cccs3)C(=O)O)ccc1C(O)=O.CS(O)(=O)=O</chem>                                      | <chem>C24H28N2O7S2</chem>   | 520.618 | Eprosartan Mesylate                                     |
| Chemicals | S4102 |                                                                                                                |                             |         |                                                         |
| Selleck   |       | <chem>s1cc(Cc(Nc2ccc(CCN[C@H](O)c3ccccc3)cc2)=O)nc1N</chem>                                                    | <chem>C21H24N4O2S</chem>    | 396.506 | Mirabegron                                              |
| Chemicals | S4009 |                                                                                                                |                             |         |                                                         |
| Selleck   |       | <chem>C1CCCC1(O)C(c2ccc(O)cc2)CN(C)C.C(=O)(O)CCC(=O)O</chem>                                                   | <chem>C20H31NO6</chem>      | 381.463 | Desvenlafaxine Succinate                                |
| Chemicals | S4112 |                                                                                                                |                             |         |                                                         |
| Selleck   |       | <chem>C(c1cnc(N2CCC[C@H]2CO)nc1NCc3ccc(O)c(Cl)c3)(=O)NCc4ncccn4</chem>                                         | <chem>C23H26ClN7O3</chem>   | 483.951 | Avanafil                                                |
| Chemicals | S4019 |                                                                                                                |                             |         |                                                         |
| Selleck   |       | <chem>c1(ccccc1)CC2=NCCN2.Cl</chem>                                                                            | <chem>C10H13ClN2</chem>     | 196.677 | Tolazoline HCl                                          |
| Chemicals | S4124 |                                                                                                                |                             |         |                                                         |
| Selleck   |       | <chem>c(c(C(=O)OCCN1CCCCC1)ccc2)(O(Cc3ccccc3)=C(C)C4=O)c24.Cl</chem>                                           | <chem>C24H26ClNO4</chem>    | 427.921 | Flavoxate HCl                                           |
| Chemicals | S4027 |                                                                                                                |                             |         |                                                         |
| Selleck   |       | <chem>C1N(C)CCN(Cc2ccccc2)c3ccccc3)C1.Cl.Cl</chem>                                                             | <chem>C18H24Cl2N2</chem>    | 339.303 | Cyclizine 2HCl                                          |
| Chemicals | S4139 |                                                                                                                |                             |         |                                                         |
| Selleck   |       | <chem>c1(C([O-])=O)c(O)ccc(N=Nc2cc(C(=O)[O-])cc2)c1.[Na+].[Na+]</chem>                                         | <chem>C14H8N2Na2O6</chem>   | 346.203 | Olsalazine Sodium                                       |
| Chemicals | S4041 |                                                                                                                |                             |         |                                                         |
| Selleck   |       | <chem>c1(S(=O)(=O)O)cc(O)ccc1O.N(CC)CC</chem>                                                                  | <chem>C10H17NO5S</chem>     | 263.311 | Ethamsylate                                             |
| Chemicals | S4152 |                                                                                                                |                             |         |                                                         |
| Selleck   |       | <chem>c1cc2c(c(OCCCN(C)C)nn2Cc3ccccc3)cc1.Cl</chem>                                                            | <chem>C19H24ClN3O</chem>    | 345.866 | Benzydamine HCl                                         |
| Chemicals | S4165 |                                                                                                                |                             |         |                                                         |
| Selleck   |       | <chem>c1(c2c(O)ccc1)C=[N+]3[Mn+3]([Cl-])([N](=C4)CC3([O-]c5c4cccc5OC)[O-]2</chem>                              | <chem>C18H18ClMnN2O4</chem> | 416.738 | EUK 134                                                 |
| Chemicals | S4261 |                                                                                                                |                             |         |                                                         |
| Selleck   |       | <chem>c1(ccc(N)cc1)S(NC(N)=N)(=O)=O</chem>                                                                     | <chem>C7H10N4O2S</chem>     | 214.245 | Sulfaguandine                                           |
| Chemicals | S4175 |                                                                                                                |                             |         |                                                         |
| Selleck   |       | <chem>N1(CC(=O)N)C(=O)CC(O)C1</chem>                                                                           | <chem>C6H10N2O3</chem>      | 158.155 | Oxiracetam                                              |
| Chemicals | S4270 |                                                                                                                |                             |         |                                                         |
| Selleck   |       | <chem>c1(O)c(Cl)cc(Oc2c(Cl)cc(CC(=O)O)cc2)cc1</chem>                                                           | <chem>C14H9Cl3O4</chem>     | 621.932 | Tiratricol                                              |
| Chemicals | s4185 |                                                                                                                |                             |         |                                                         |
| Selleck   |       | <chem>Nc1cc(Cl)c(C(=O)OCCN(CC)CC)cc1.Cl</chem>                                                                 | <chem>C13H20Cl2N2O2</chem>  | 307.216 | Chloroprocaine HCl                                      |
| Chemicals | S4284 |                                                                                                                |                             |         |                                                         |
| Selleck   |       | <chem>C1(N)=Nc2c(nn[nH]2)C(=O)N1</chem>                                                                        | <chem>C4H4N6O</chem>        | 152.114 | Azaguanine-8                                            |
| Chemicals | S4194 |                                                                                                                |                             |         |                                                         |
| Selleck   |       | <chem>c1cc(C(=O)NCCN(CC)CC)ccc1N.Cl</chem>                                                                     | <chem>C13H22ClN3O</chem>    | 271.786 | Procainamide HCl                                        |
| Chemicals | S4294 |                                                                                                                |                             |         |                                                         |
| Selleck   |       | <chem>C1OCCN(CC2CN(N=Cc3ccc([N+])([O-])=O)c3)C(=O)O2)C1.Cl</chem>                                              | <chem>C13H17ClN4O6</chem>   | 360.75  | Furaltadone HCl                                         |
| Chemicals | S4203 |                                                                                                                |                             |         |                                                         |
| Selleck   |       | <chem>n1c(c2c(NCCc3ccc(Oc4ccccc4)cc3)nc1)ccc(N)c2</chem>                                                       | <chem>C22H20N4O</chem>      | 356.42  | QNZ (EVP4593)                                           |
| Chemicals | S4902 |                                                                                                                |                             |         |                                                         |
| Selleck   |       | <chem>n1c(C=Cc2ccc([C@H](CCc3ccccc3C(C)C)O)SCC4(CC([O-])=O)CC4)c2)ccc(c15)ccc(Cl)c5.[Na+]</chem>               | <chem>C35H35ClNNaO3S</chem> | 608.165 | Montelukast Sodium<br>MEK162 (ARRY-162,<br>ARRY-438162) |
| Chemicals | S4211 |                                                                                                                |                             |         |                                                         |
| Selleck   |       | <chem>c(ncn1C)(c(F)c(Nc2ccc(Br)cc2F)c(C(=O)NOCCO)c3)c13</chem>                                                 | <chem>C17H15BrF2N4O3</chem> | 441.227 |                                                         |
| Chemicals | S7007 |                                                                                                                |                             |         |                                                         |
| Selleck   |       | <chem>[C@H]([C@@H](NC(=O)[C@H](NC(=O)N1CCN(CC)C(=O)C1=O)c2ccccc2)C3=O)SC(C)(C)[C@H]4C([O-])=O)N34.[Na+]</chem> | <chem>C23H26N5NaO7S</chem>  | 539.537 | Piperacillin Sodium                                     |
| Chemicals | S4222 |                                                                                                                |                             |         |                                                         |
| Selleck   |       | <chem>C1(CCCCCCCCCC)=C(O)C(=O)C=C(O)C1=O</chem>                                                                | <chem>C17H26O4</chem>       | 294.386 | Embelin                                                 |
| Chemicals | S7025 |                                                                                                                |                             |         |                                                         |
| Selleck   |       | <chem>[C@H]1(Cc2cncn2C)COC(=O)[C@H]1CC.Cl</chem>                                                               | <chem>C11H17ClN2O2</chem>   | 244.718 | Pilocarpine HCl                                         |
| Chemicals | S4231 |                                                                                                                |                             |         |                                                         |
| Selleck   |       | <chem>c1(C(=O)N2CCN(C)CCC2)cc(c3cc(C=C4c5c(ccc(Cl)c5)NC4=O)cc3)ccc1.Cl</chem>                                  | <chem>C26H25Cl2N3O3</chem>  | 498.401 | CX-6258 HCl                                             |
| Chemicals | S7041 |                                                                                                                |                             |         |                                                         |
| Selleck   |       | <chem>CCCCCCCCCCCCCCC[N+](C)(C)C.[Br-]</chem>                                                                  | <chem>C19H42BrN</chem>      | 364.447 | Cetrimonium Bromide<br>(CTAB)                           |
| Chemicals | S4242 |                                                                                                                |                             |         |                                                         |
| Selleck   |       | <chem>c1(Cl)c(F)c(C(=O)N2CCN(Cc3nc(Nc4scnn4)ccc3)CC2)ccc1</chem>                                               | <chem>C20H19ClFN5OS</chem>  | 431.914 | MK-8745                                                 |
| Chemicals | S7065 |                                                                                                                |                             |         |                                                         |
| Selleck   |       | <chem>c(cccc1)(Nc2c(cccc2)S3)c13</chem>                                                                        | <chem>C12H9NS</chem>        | 199.272 | Phenothiazine                                           |
| Chemicals | S4251 |                                                                                                                |                             |         |                                                         |
| Selleck   |       | <chem>C(CCS1)(N=C(C(SCC(=O)Nc2sc3c(ccc(C)c3)n2)N(c4ccccc4)C5=O)=C15</chem>                                     | <chem>C22H18N4O2S3</chem>   | 466.599 | IWP-2                                                   |
| Chemicals | S7085 |                                                                                                                |                             |         |                                                         |
| Selleck   |       | <chem>c1cc(S(=O)(=O)Nc2nc(C)cc(C)n2)ccc1N</chem>                                                               | <chem>C12H14N4O2S</chem>    | 278.33  | Sulfamethazine                                          |
| Chemicals | S3133 |                                                                                                                |                             |         |                                                         |
| Selleck   |       | <chem>C([C@H](N)C(=O)OCC(OCCN1C2C(C(=O)NC(N)=N2)=C1)CO)(C)C.Cl</chem>                                          | <chem>C14H25ClN6O5</chem>   | 392.838 | Valganciclovir HCl                                      |
| Chemicals | S4050 |                                                                                                                |                             |         |                                                         |
| Selleck   |       | <chem>c1cc2c(CC[C@]3([H])[C@@]2([H])CC[C@]4(C)[C@@]3([H])CC[C@H]4OC(=O)CCCC)cc1O</chem>                        | <chem>C23H32O3</chem>       | 356.498 | Estradiol valerate                                      |
| Chemicals | S3149 |                                                                                                                |                             |         |                                                         |
| Selleck   |       | <chem>C1C(=CC=C2CC[C@]3(C)[C@@]2([H])CC[C@H]3[C@H](C)CCCC(C)C)C(=C)CC[C@H]1O</chem>                            | <chem>C27H44O</chem>        | 384.638 | Vitamin D3                                              |
| Chemicals | S4063 |                                                                                                                |                             |         |                                                         |
| Selleck   |       | <chem>C1[C@@H](N(C)[C@@H]2C1)C[C@@H](OCc3ccccc3)c4ccccc4)C2.CS(O)(=O)=O</chem>                                 | <chem>C22H29NO4S</chem>     | 403.535 | Benztrapine mesylate                                    |
| Chemicals | S3163 |                                                                                                                |                             |         |                                                         |

|           |       |                                                                                                                                                                                                       |                 |         |                       |
|-----------|-------|-------------------------------------------------------------------------------------------------------------------------------------------------------------------------------------------------------|-----------------|---------|-----------------------|
| Selleck   |       |                                                                                                                                                                                                       |                 |         |                       |
| Chemicals | S4074 | [O-]N=O.[Na+]                                                                                                                                                                                         | NNaO2           | 68.995  | Sodium Nitrite        |
| Selleck   |       |                                                                                                                                                                                                       |                 |         |                       |
| Chemicals | S3181 | c1(cc(F)c2)c(N3C=C(C(O)=O)C1=O)c2CCC3C                                                                                                                                                                | C14H12FNO3      | 261.248 | Flumequine            |
| Selleck   |       |                                                                                                                                                                                                       |                 |         |                       |
| Chemicals | S4084 | C(c1ccc(F)cc1)(c2ccc(F)cc2)N3CCN(Cc4ccc(OC)c(OC)c4OC)CC3.Cl.Cl                                                                                                                                        | C27H32Cl2F2N2O3 | 541.457 | Lomerizine HCl        |
| Selleck   |       |                                                                                                                                                                                                       |                 |         |                       |
| Chemicals | S3196 | N1CCC(C(c2ccccc2)(c3ccccc3)O)CC1                                                                                                                                                                      | C18H21NO        | 267.365 | Azacyclonol           |
| Selleck   |       |                                                                                                                                                                                                       |                 |         |                       |
| Chemicals | S4095 | C1(=O)C=C[C@@]2(C)C([C@@H](F)C[C@]3([H])([C@@]2(F)[C@H](O)C[C@@]4(C)[C@@]3([H])CC[C@@]4(O)C(CCC)=O)C(=O)CO C(=O)C)=C1                                                                                 | C27H34F2O7      | 508.551 | Difluprednate         |
| Selleck   |       |                                                                                                                                                                                                       |                 |         |                       |
| Chemicals | S3603 | [C@]([C@H](C(C)=C)CC1)([C@]2([H])[C@](C)([C@@]3(C)[C@@]([H])([C@]4(C)[C@]([H])(C(C)C)[C@H](O)CC4)CC3)CC2)CC5)([C@]15C(=O)O)[H]                                                                        | C30H48O3        | 456.7   | Betulinic acid        |
| Selleck   |       |                                                                                                                                                                                                       |                 |         |                       |
| Chemicals | S4104 | c1cc(N=NNc2ccc(C(N)=N)cc2)ccc1C(=N)N.O.C(=O)CNC(C)=O.O.C(=O)CN C(C)=O                                                                                                                                 | C22H29N9O6      | 515.522 | Diminazene Aceturate  |
| Selleck   |       |                                                                                                                                                                                                       |                 |         |                       |
| Chemicals | S4010 | c1(OCC(O)CNC(C)C)ccc(NC(=O)CCC)cc1C(=O)C.Cl                                                                                                                                                           | C18H29ClN2O4    | 372.887 | Acebutolol HCl        |
| Selleck   |       |                                                                                                                                                                                                       |                 |         |                       |
| Chemicals | S4113 | C1CCCCC1(O)C(c2ccc(O)cc2)CN(C)C                                                                                                                                                                       | C16H25NO2       | 263.375 | Desvenlafaxine        |
| Selleck   |       |                                                                                                                                                                                                       |                 |         |                       |
| Chemicals | S4020 | C(c1ncccc1)(c2ccc(OS([O-])(=O)=O)cc2)c3ccc(OS([O-])(=O)=O)cc3.[Na+].[Na+]                                                                                                                             | C18H13NNa2O8S2  | 481.407 | Sodium Picosulfate    |
| Selleck   |       |                                                                                                                                                                                                       |                 |         |                       |
| Chemicals | S4125 | C(O[Na])(=O)CCCc1ccccc1                                                                                                                                                                               | C10H11NaO2      | 186.183 | Sodium Phenylbutyrate |
| Selleck   |       |                                                                                                                                                                                                       |                 |         |                       |
| Chemicals | S4031 | C(O)(c1cccs1)(c2cccs2)C(=O)O[C@@H]3C([H])(CC[N+](CCCCc5ccccc5)C3)CC4.[Br-]                                                                                                                            | C26H30BrNO4S2   | 564.555 | Acridinium Bromide    |
| Selleck   |       |                                                                                                                                                                                                       |                 |         |                       |
| Chemicals | S4141 | c1(C(N)=O)cc([N+](=O)[O-])cc([N+](O)=O)c1C                                                                                                                                                            | C8H7N3O5        | 225.158 | Dinitolmide           |
| Selleck   |       |                                                                                                                                                                                                       |                 |         |                       |
| Chemicals | S4042 | c(cccc1)(c(C(=O)N[C@H]2[C@]3([H])N([C@H](C(O[Na])=O)C(C)S3)C2=O)c(C(C)CC)cc4)c14.O                                                                                                                    | C21H23N2NaO6S   | 454.472 | Nafcillin Sodium      |
| Selleck   |       |                                                                                                                                                                                                       |                 |         |                       |
| Chemicals | S4155 | c(ccc(Cl)c1)(OC(=O)N2)c12                                                                                                                                                                             | C7H4ClNO2       | 169.565 | Chlorzoxazone         |
| Selleck   |       |                                                                                                                                                                                                       |                 |         |                       |
| Chemicals | S4166 | c1cc(S(=O)(=O)NC(NCCC)=O)ccc1Cl                                                                                                                                                                       | C10H13ClN2O3S   | 276.74  | Chlorpropamide        |
| Selleck   |       |                                                                                                                                                                                                       |                 |         |                       |
| Chemicals | S4263 | c1(C)cc(NC(=O)Cc2ccc(OC(C)C(C(=O)[O-])cc2)cc(C)c1.[Na+]                                                                                                                                               | C20H22NNaO4     | 363.383 | Efaproxiral Sodium    |
| Selleck   |       |                                                                                                                                                                                                       |                 |         |                       |
| Chemicals | S4176 | C(N)(CO)(CO)CO                                                                                                                                                                                        | C4H11NO3        | 121.135 | Trometamol            |
| Selleck   |       |                                                                                                                                                                                                       |                 |         |                       |
| Chemicals | S4274 | C1c2c(cccc2O)C[C@@H](N(CCC)CCc3cccs3)C1                                                                                                                                                               | C19H25NOS       | 315.473 | Rotigotine            |
| Selleck   |       |                                                                                                                                                                                                       |                 |         |                       |
| Chemicals | S4186 | C(C)CCCCCCCC[N+](C)(C)CCOc1ccccc1.[Br-]                                                                                                                                                               | C22H40BrNO      | 414.463 | Domiphen Bromide      |
| Selleck   |       |                                                                                                                                                                                                       |                 |         |                       |
| Chemicals | S4285 | c1cc(C(c2ccccc2)=C(c3ccccc3)CCCl)ccc1OCCO                                                                                                                                                             | C24H23ClO2      | 378.891 | Ospemifene            |
| Selleck   |       |                                                                                                                                                                                                       |                 |         |                       |
| Chemicals | S4195 | c1c(Br)c2c(nccc2)c(O)c1Br                                                                                                                                                                             | C9H5Br2NO       | 302.95  | Broxyquinoline        |
| Selleck   |       |                                                                                                                                                                                                       |                 |         |                       |
| Chemicals | S4295 | c1c(Cl)c(Nc2c(C(O[Na])=O)ccccc2)c(Cl)c(Cl)c1                                                                                                                                                          | C14H10Cl2NNaO2  | 318.13  | Meclofenamate Sodium  |
| Selleck   |       |                                                                                                                                                                                                       |                 |         |                       |
| Chemicals | S4204 | [C@@H]1(O)[C@@]2([H])[C@@]([H])([C@H](O)CO2)OC1                                                                                                                                                       | C6H10O4         | 146.141 | Isosorbide            |
| Selleck   |       |                                                                                                                                                                                                       |                 |         |                       |
| Chemicals | S4904 | N1(C(OC2ccc([N+](O-)=O)cc2)=O)CCC(C(c3ccc(c4c3)OCO4)(c5ccc(c6c5)OCO6)O)CC1                                                                                                                            | C27H24N2O9      | 520.487 | JZL184                |
| Selleck   |       |                                                                                                                                                                                                       |                 |         |                       |
| Chemicals | S4213 | C1[C@H](C)O[C@@H](O[C@@H]2[C@H](C)[C@H](O[C@H]3C[C@@](C)(OC)[C@@H](O)[C@H](C)O3)[C@H](C)C(=O)O[C@@H](CC)[C@@](C)(O)C([H])([C@H](C)[C@]4([H])[C@H](C)C[C@@]2(O)C)O[C@H](COC COC)N4)[C@H](O)[C@H]1N(C)C | C42H78N2O14     | 835.074 | Dirithromycin         |
| Selleck   |       |                                                                                                                                                                                                       |                 |         |                       |
| Chemicals | S7008 | n1c(N)c2c(n(C(C)C)C)nc2c3ccc(Cl)cc3)nc1                                                                                                                                                               | C15H16ClN5      | 301.774 | PP2                   |
| Selleck   |       |                                                                                                                                                                                                       |                 |         |                       |
| Chemicals | S4223 | C1(=O)C[C@H](O)C[C@H](CC[C@H]2[C@@H](C)C=CC([C@@]23[H])=CC[C@@H]3O)C([C@@H](C)CC)=O)O1                                                                                                                | C23H34O5        | 390.513 | Mevastatin            |
| Selleck   |       |                                                                                                                                                                                                       |                 |         |                       |
| Chemicals | S7028 | c1c(Cl)c2c(C=C([C@@H](Nc3c4c([nH]cn4)ncn3)C)N(c5ccccc5)C2=O)cc1                                                                                                                                       | C22H17ClN6O     | 416.863 | IPI-145 (INK1197)     |
| Selleck   |       |                                                                                                                                                                                                       |                 |         |                       |
| Chemicals | S4232 | c1(NC(=O)C)nc([N+](O-)=O)s1                                                                                                                                                                           | C5H5N3O3S       | 187.176 | Nithiamide            |
| Selleck   |       |                                                                                                                                                                                                       |                 |         |                       |
| Chemicals | S7048 | c1c2c(C3=NNC2=O)c(N[C@H](c4ccc(F)cc4)[C@H]3c5n(C)ncn5)cc1F                                                                                                                                            | C19H14F2N6O     | 380.351 | BMN 673               |
| Selleck   |       |                                                                                                                                                                                                       |                 |         |                       |
| Chemicals | S4244 | c1(O)cc2c([nH]cc2CCN)cc1.Cl                                                                                                                                                                           | C10H13ClN2O     | 212.676 | Serotonin HCl         |



|           |       |                                                                                                                                                                                                                                                                                                          |                   |          |                          |
|-----------|-------|----------------------------------------------------------------------------------------------------------------------------------------------------------------------------------------------------------------------------------------------------------------------------------------------------------|-------------------|----------|--------------------------|
| Selleck   |       |                                                                                                                                                                                                                                                                                                          |                   |          |                          |
| Chemicals | S7070 | <chem>C1CN(c2cc(NCCC(=O)OCC)nc(c3cccc3)n2)CCc4c1cccc4.Cl</chem>                                                                                                                                                                                                                                          | C24H28ClN5O2      | 453.964  | GSK J4 HCl               |
| Selleck   |       |                                                                                                                                                                                                                                                                                                          |                   |          |                          |
| Chemicals | S4252 | <chem>ClCCN(CCC)C.Cl</chem>                                                                                                                                                                                                                                                                              | C5H12Cl3N         | 192.514  | Mechlorethamine HCl      |
| Selleck   |       | <chem>[C@@](C)([C@H](C[C@H]12)C=C1)(C(=O)N(c3ccc(C(Nc4c5c(cccn5)ccc4)=O)cc3)C6=O)[C@@]26[H]</chem>                                                                                                                                                                                                       | C26H21N3O3        | 423.463  | IWR-1-endo               |
| Chemicals | S7086 |                                                                                                                                                                                                                                                                                                          |                   |          |                          |
| Selleck   |       | <chem>C(O)(=O)c1cccc1O.[Na]</chem>                                                                                                                                                                                                                                                                       | C7H6NaO3          | 161.111  | Sodium salicylate        |
| Chemicals | S3137 |                                                                                                                                                                                                                                                                                                          |                   |          |                          |
| Selleck   |       | <chem>c1(OC)cc2c(cc(CCC(=O)C)cc2)cc1</chem>                                                                                                                                                                                                                                                              | C15H16O2          | 228.286  | Nabumetone               |
| Chemicals | S4051 |                                                                                                                                                                                                                                                                                                          |                   |          |                          |
| Selleck   |       | <chem>c1(C(OC)=O)sc(C)C1NC(=O)C(NCCC)C.Cl</chem>                                                                                                                                                                                                                                                         | C13H21ClN2O3S     | 320.835  | Articaine HCl            |
| Chemicals | S3150 |                                                                                                                                                                                                                                                                                                          |                   |          |                          |
| Selleck   |       | <chem>c1(C(c2ccc(F)cc2)(CCCN(C)C)OC3c3cc(C#N)cc1.O.C(C(=O)=O)=O</chem>                                                                                                                                                                                                                                   | C22H23FN2O5       | 414.427  | Escitalopram Oxalate     |
| Chemicals | S4064 | <chem>C1CC(=C(C=C[C@@]2(C)[C@@]3([H])CC[C@@]2(O)CC=C)[C@]34[H])C(C</chem>                                                                                                                                                                                                                                | C21H26O2          | 310.43   | Altrenogest              |
| Selleck   |       | <chem>C4)=CC1=O</chem>                                                                                                                                                                                                                                                                                   |                   |          |                          |
| Chemicals | S3167 |                                                                                                                                                                                                                                                                                                          |                   |          |                          |
| Selleck   |       | <chem>c1cc2c(cccc2OCC(O)CNC(C)C)cc1.Cl</chem>                                                                                                                                                                                                                                                            | C16H22ClNO2       | 295.804  | Propranolol HCl          |
| Chemicals | S4076 |                                                                                                                                                                                                                                                                                                          |                   |          |                          |
| Selleck   |       | <chem>C(N(C)C)CC=C1c2c(cccc2)CCc3c1cccc3.Cl</chem>                                                                                                                                                                                                                                                       | C20H24ClN         | 313.864  | Amitriptyline HCl        |
| Chemicals | S3183 |                                                                                                                                                                                                                                                                                                          |                   |          |                          |
| Selleck   |       | <chem>c1(OC[C@@H](O)CNC(C)C)ccc(CCOCC2CC2)cc1.Cl</chem>                                                                                                                                                                                                                                                  | C18H30ClNO3       | 343.889  | Levobetaxolol HCl        |
| Chemicals | S4085 |                                                                                                                                                                                                                                                                                                          |                   |          |                          |
| Selleck   |       | <chem>C(O)(=O)c1ccc(C(F)(F)F)cc1O.C(C)=O</chem>                                                                                                                                                                                                                                                          | C10H7F3O4         | 248.155  | Triflusal                |
| Chemicals | S3200 |                                                                                                                                                                                                                                                                                                          |                   |          |                          |
| Selleck   |       | <chem>c1cc2c(N(C3=CCN(CCCC(c4ccc(F)cc4)=O)CC3)C(=O)N2)cc1</chem>                                                                                                                                                                                                                                         | C22H22FN3O2       | 379.427  | Droperidol               |
| Chemicals | S4096 | <chem>[C@](O1)([C@@H]1[C@@H]2[C@@]([C(C)C](O2)[C@H]3O)([C@]4(C)[C</chem>                                                                                                                                                                                                                                 | C20H24O6          | 360.401  | Triptolide (PG490)       |
| Selleck   |       | <chem>@@]([H])(C5=C(C(=O)OC5)CC4)C6)[C@@]3(O7)[C@@H]67</chem>                                                                                                                                                                                                                                            |                   |          |                          |
| Chemicals | S3604 |                                                                                                                                                                                                                                                                                                          |                   |          |                          |
| Selleck   |       | <chem>c1(cc(C)C(NC(=O)c2cc(l)cc(l)c2[O-])cc1Cl)C(C#N)c3ccc(Cl)cc3.[Na+]</chem>                                                                                                                                                                                                                           | C22H13Cl2I2N2NaO2 | 685.056  | Closantel Sodium         |
| Chemicals | S4105 |                                                                                                                                                                                                                                                                                                          |                   |          |                          |
| Selleck   |       | <chem>C1(OC(C)OC(=O)OCC)=C(C(=O)Nc2cccc2)N(C)S(=O)(=O)c3c1cccc3</chem>                                                                                                                                                                                                                                   | C20H21N3O7S       | 447.462  | Ampiroxicam              |
| Chemicals | S4011 |                                                                                                                                                                                                                                                                                                          |                   |          |                          |
| Selleck   |       | <chem>c1ccc(Oc2c(Cl)cc3c(nc(SC)[nH]3)c2)c(Cl)c1Cl</chem>                                                                                                                                                                                                                                                 | C14H9Cl3N2O5      | 359.658  | Triclabendazole          |
| Chemicals | S4114 |                                                                                                                                                                                                                                                                                                          |                   |          |                          |
| Selleck   |       | <chem>c1(cc(O)c(O)c([N+])([O-])=O)c1C(=O)c2ccc(C)cc2</chem>                                                                                                                                                                                                                                              | C14H11NO5         | 273.241  | Tolcapone                |
| Chemicals | S4021 |                                                                                                                                                                                                                                                                                                          |                   |          |                          |
| Selleck   |       | <chem>c1(C(=O)NC2CNCC2)cc(OC)c(OC)c(OC)c1</chem>                                                                                                                                                                                                                                                         | C15H22N2O4        | 294.346  | Troxipide                |
| Chemicals | S4128 |                                                                                                                                                                                                                                                                                                          |                   |          |                          |
| Selleck   |       | <chem>C(c1cccc1)(c2cccc2)=C3CC[N+](C)(C)CC3.S([O-])(=O)(=O)OC</chem>                                                                                                                                                                                                                                     | C21H27NO4S        | 389.508  | Diphenamil Methylsulfate |
| Chemicals | S4034 |                                                                                                                                                                                                                                                                                                          |                   |          |                          |
| Selleck   |       | <chem>c1cnc(C(c2cccc2)(C(=O)N)CCN(C(C)C)C(C)C)cc1.P(O)(O)(O)=O</chem>                                                                                                                                                                                                                                    | C21H32N3O5P       | 437.47   | Pentoxifyverine Citrate  |
| Chemicals | S4143 |                                                                                                                                                                                                                                                                                                          |                   |          |                          |
| Selleck   |       | <chem>N(CCN1)=C1C2CCCc(c23)cccc3.Cl</chem>                                                                                                                                                                                                                                                               | C13H17ClN2        | 236.74   | Tetrahydrozoline HCl     |
| Chemicals | S4043 |                                                                                                                                                                                                                                                                                                          |                   |          |                          |
| Selleck   |       | <chem>c1cc(C(NCCc2ccc(OC(C(=O)O)(C)C)cc2)=O)ccc1Cl</chem>                                                                                                                                                                                                                                                | C19H20ClNO4       | 361.819  | Bezafibrate              |
| Chemicals | S4159 |                                                                                                                                                                                                                                                                                                          |                   |          |                          |
| Selleck   |       | <chem>n1c(NC2CC2)nc(N)nc1N</chem>                                                                                                                                                                                                                                                                        | C6H10N6           | 166.184  | Cyromazine               |
| Chemicals | S4167 |                                                                                                                                                                                                                                                                                                          |                   |          |                          |
| Selleck   |       | <chem>c1cc(OC(C)(C)C(=O)OCCOC(=O)c2cccc2)ccc1Cl</chem>                                                                                                                                                                                                                                                   | C18H18ClNO5       | 363.792  | Etofibrate               |
| Chemicals | S4264 |                                                                                                                                                                                                                                                                                                          |                   |          |                          |
| Selleck   |       | <chem>N1C(=O)NC=CC1=O</chem>                                                                                                                                                                                                                                                                             | C4H4N2O2          | 112.087  | Uracil                   |
| Chemicals | S4177 |                                                                                                                                                                                                                                                                                                          |                   |          |                          |
| Selleck   |       | <chem>c(sc(CC)c1)(n2c(nnc2C)CN=C3c4c(Cl)cccc4)c13</chem>                                                                                                                                                                                                                                                 | C17H15ClN4S       | 342.846  | Etizolam                 |
| Chemicals | S4276 |                                                                                                                                                                                                                                                                                                          |                   |          |                          |
| Selleck   |       | <chem>C(Nc1cccc1)(=O)c2cccc2O</chem>                                                                                                                                                                                                                                                                     | C13H11NO2         | 213.232  | Salicylanilide           |
| Chemicals | S4187 | <chem>[C@H]1(O)NC(=O)[C@@H](N2C(=O)[C@H]([C@H](O)C)NC(=O)[C@H]([C@H](O)[C@@H](O)c3ccc(O)cc3)NC(=O)[C@@H](N4C(=O)[C@H]([C@H](O)C)NC(=O)[C@@H](c5ccc(c6ccc(c7ccc(OCCCCC)cc7)cc6)cc5)=O)[C@H]1O)[C@H](O)[C@@H](CC(C)=CC(=O)O)CCCCCCCCC(=O)O)OC[C@]1([H])C[C@H]2[C@@]([C@@H](C)[C@@H](O)C)[C@@H](C)C2</chem> | C58H73N7O17       | 1140.237 | Anidulafungin (LY303366) |
| Selleck   |       |                                                                                                                                                                                                                                                                                                          |                   |          | Ethacridine lactate      |
| Chemicals | S4286 | <chem>c1cc2c(nc3c(cc(OC)cc3)c2N)cc1N.O.C(C)C(=O)O.O</chem>                                                                                                                                                                                                                                               | C18H23N3O5        | 361.392  | monohydrate              |
| Chemicals | S4196 | <chem>[C@H]1(O)[C@H](O)[C@H](CC(C)=CC(=O)O)CCCCCCCCC(=O)O)OC[C@]1([H])C[C@H]2[C@@]([C@@H](C)[C@@H](O)C)[C@@H](O)C2</chem>                                                                                                                                                                                | C26H44O9          | 500.622  | Mupirocin                |
| Selleck   |       |                                                                                                                                                                                                                                                                                                          |                   |          |                          |
| Chemicals | S4297 |                                                                                                                                                                                                                                                                                                          |                   |          |                          |
| Selleck   |       | <chem>c1cc2c(c3c(ccc3)s2)cc1</chem>                                                                                                                                                                                                                                                                      | C12H8S            | 184.257  | Dibenzothiophene         |
| Chemicals | S4205 |                                                                                                                                                                                                                                                                                                          |                   |          |                          |
| Selleck   |       | <chem>c1(c2ccsc2)sc(C(N)=O)c(N)c1</chem>                                                                                                                                                                                                                                                                 | C9H8N2OS2         | 224.303  | SC-514                   |
| Chemicals | S4907 |                                                                                                                                                                                                                                                                                                          |                   |          |                          |

|           |       |                                                                                         |                 |         |                      |
|-----------|-------|-----------------------------------------------------------------------------------------|-----------------|---------|----------------------|
| Selleck   |       | [C@H]1(C)[C@H](CO)O[C@H](O[C@@@]2(C)[C@H](O)[C@H](O)[C@H](O)[C@H](CO)O2)[C@H](O)[C@H]1O | C12H19Cl3O8     | 397.633 | Sucralose            |
| Chemicals | S4214 |                                                                                         |                 |         |                      |
| Selleck   |       | s1c(NC(=O)[C@H]2CCCN2C(=O)[C@H](C3CCCCC3)NC(=O)[C@H](C)NC)c4cccc4)nn1                   | C25H34N6O3S     | 498.641 | GDC-0152             |
| Chemicals | S7010 |                                                                                         |                 |         |                      |
| Selleck   |       | [C@H](O)(CO)[C@@H](O)CO                                                                 | C4H10O4         | 122.12  | Erythritol           |
| Chemicals | S4224 |                                                                                         |                 |         |                      |
| Selleck   |       | c1cc2c(C(Cc3cc(C(=O)N4CC(C(O)C)CC4)c(F)cc3)=NNC2=O)cc1                                  | C22H22FN3O3     | 395.427 | AZD2461              |
| Chemicals | S7029 |                                                                                         |                 |         |                      |
| Selleck   |       | c(ccc(C)c1)(oc(N)n2)c12                                                                 | C7H5ClN2O       | 168.58  | Zoxazolamine         |
| Chemicals | S4233 |                                                                                         |                 |         |                      |
| Selleck   |       | N(C(=O)c1sc(C)nc1)[C@@H](CO)C(=O)N[C@@H](CO)C(=O)N[C@@H](Cc2ccccc2)C(=O)C3(C)CO3        | C25H32N4O7S     | 532.609 | Oprozomib (ONX 0912) |
| Chemicals | S7049 |                                                                                         |                 |         |                      |
| Selleck   |       | [C@@]1([H])([C@@H](O)CO)OC(=O)C(O)C1O.[Na]                                              | C6H10NaO6       | 201.13  | Sodium ascorbate     |
| Chemicals | S4245 |                                                                                         |                 |         |                      |
| Selleck   |       | [C@]1([H])([C@@]2([H])N(C)CCc3c2cc4c(OCO4)c3)OC(=O)c5c1ccc6c5O                          | C20H17NO6       | 367.352 | (+)-Bicuculline      |
| Chemicals | S7071 |                                                                                         |                 |         |                      |
| Selleck   |       | N(C(N)=NC1)(c2c(cccc2)Cc3c4cccc3)C14.[H]Cl                                              | C16H16ClN3      | 285.771 | Epinastine HCl       |
| Chemicals | S4253 |                                                                                         |                 |         |                      |
| Selleck   |       | c1(N2C[C@@H](C)NC3CCCC3)=O)CC[C@H]2C)cc(c4ccc5c([nH]nc5N)c4)nc(NC)n1                    | C25H34N8O       | 462.59  | GSK2334470           |
| Chemicals | S7087 |                                                                                         |                 |         |                      |
| Selleck   |       | C1(=S)NC(C)=CC(=O)N1                                                                    | C5H6N2OS        | 142.179 | Methylthiouracil     |
| Chemicals | S3138 |                                                                                         |                 |         |                      |
| Selleck   |       | c(cccc1)([C@H](NC)CC[C@H]2c3cc(C)c(C)cc3)c12.Cl                                         | C17H18Cl3N      | 342.691 | Sertraline HCl       |
| Chemicals | S4053 |                                                                                         |                 |         |                      |
| Selleck   |       | c1(S(NC(NC2CCCC2)=O)(=O)=O)ccc(CCN3C(=O)C(C)(C)c(c4C3=O)ccc(O)c4)cc1                    | C27H33N3O6S     | 527.632 | Gliquidone           |
| Chemicals | S3151 |                                                                                         |                 |         |                      |
| Selleck   |       | c1c(C)c(C=C=NNC(=N)N)c(C)cc1.CC(=O)O                                                    | C10H12Cl2N4O2   | 291.134 | Guanabenz Acetate    |
| Chemicals | S4065 |                                                                                         |                 |         |                      |
| Selleck   |       | N1([C@]2([H])SC(C)(C)[C@@H]1C([O-])=O)C(=O)[C@H]2NC(=O)[C@H](N)c3ccccc3.[Na+]           | C16H18N3NaO4S   | 371.387 | Ampicillin sodium    |
| Chemicals | S3170 |                                                                                         |                 |         |                      |
| Selleck   |       | c1c(O)ccc(OC)c1                                                                         | C7H8O2          | 124.137 | Mequinol             |
| Chemicals | S4077 |                                                                                         |                 |         |                      |
| Selleck   |       | O=C(c1cc(O)c(O)cc1)CNC.Cl                                                               | C9H12ClNO3      | 217.649 | Adrenalone HCl       |
| Chemicals | S3185 |                                                                                         |                 |         |                      |
| Selleck   |       | C1(N2CCN(C)CC2)=Nc3c(cccc3)Oc4c1cc(Cl)cc4.C(C(=O)O)CC(=O)O                              | C22H24ClN3O5    | 445.896 | Loxapine Succinate   |
| Chemicals | S4086 |                                                                                         |                 |         |                      |
| Selleck   |       | c1c(c2ccc1C(F)(F)F)N(CCCN3CCN(C)CC3)c(c4S2)cccc4.Cl.Cl                                  | C21H26Cl2F3N3S  | 480.417 | Trifluoperazine 2HCl |
| Chemicals | S3201 |                                                                                         |                 |         |                      |
| Selleck   |       | C1C[C@]2(C)C(C=C[C@]3([H])([C@]2([H])CC[C@]4(C)[C@@]3([H])CC[C@]4(C)C(=O)[H])=CC1=O     | C21H28O2        | 312.446 | Dydrogesterone       |
| Chemicals | S4097 |                                                                                         |                 |         |                      |
| Selleck   |       | c(c1[nH]c2)(c2C[C@]3([H])[C@]4([H])C[C@H](CSC)CN3CCC)c4ccc1.CS(=O)(=O)O                 | C20H30N2O3S2    | 410.594 | Pergolide mesylate   |
| Chemicals | S4000 |                                                                                         |                 |         |                      |
| Selleck   |       | c1(cc(C)c(NC(=O)c2cc(l)cc(l)c2O)cc1Cl)(C#N)c3ccc(Cl)cc3                                 | C22H14Cl2I2N2O2 | 663.074 | Closantel            |
| Chemicals | S4106 |                                                                                         |                 |         |                      |
| Selleck   |       | C1NCCC(=C2c3c(cccn3)CCc4c2ccc(Cl)c4)C1                                                  | C19H19ClN2      | 310.821 | Desloratadine        |
| Chemicals | S4012 |                                                                                         |                 |         |                      |
| Selleck   |       | CC(C)CC(=O)N                                                                            | C5H11NO         | 101.147 | Isovaleramide        |
| Chemicals | S4116 |                                                                                         |                 |         |                      |
| Selleck   |       | c1cc(C(O)=O)ccc1S(=O)(=O)N(CCC)CCC                                                      | C13H19NO4S      | 285.359 | Probenecid           |
| Chemicals | S4022 |                                                                                         |                 |         |                      |
| Selleck   |       | c1cc(N2CCN(C[C@@H](O)CO)CC2)ccc1                                                        | C13H20N2O2      | 236.31  | Levodropropizine     |
| Chemicals | S4131 |                                                                                         |                 |         |                      |
| Selleck   |       | [C@](C)([C@@H]([C@H](C)C=C[C@H](C)(C)C)CC1)(CCCC2=CC=C3C[C@H](O)CCC3=C)[C@@]12[H]       | C28H44O         | 396.648 | Vitamin D2           |
| Chemicals | S4035 |                                                                                         |                 |         |                      |
| Selleck   |       | c1c(C)[n+](Cc2c(N)nc(CCC)nc2)ccc1.Cl.[Cl-]                                              | C14H20Cl2N4     | 315.241 | Amprolium HCl        |
| Chemicals | S4144 |                                                                                         |                 |         |                      |
| Selleck   |       | c1cc(SC(F)(F)F)ccc1Oc2ccc(N3C(=O)NC(=O)N(C)C3=O)cc2C                                    | C18H14F3N3O4S   | 425.382 | Toltrazuril          |
| Chemicals | S4044 |                                                                                         |                 |         |                      |
| Selleck   |       | N([C@@H](C([O-])=O)C(C)(C)S1)(C(=O)[C@H]2NC(=O)Cc3ccccc3)[C@]12[H].[Na+]                | C16H17N2NaO4S   | 356.372 | Penicillin G Sodium  |
| Chemicals | S4160 |                                                                                         |                 |         |                      |
| Selleck   |       | c1(NC(=O)C(C#N)=C(O)C)ccc(C(F)(F)F)cc1                                                  | C12H9F3N2O2     | 270.207 | Teriflunomide        |
| Chemicals | S4169 |                                                                                         |                 |         |                      |
| Selleck   |       | c1(ncccc1)C(=O)NCC(C)NC(=O)c2ncccc2                                                     | C15H16N4O2      | 284.313 | Nicaraven            |
| Chemicals | S4265 |                                                                                         |                 |         |                      |
| Selleck   |       | C(C(=O)C(C)(C)C)(Oc1ccc(Cl)cc1)n2ncnc2                                                  | C15H17ClN2O2    | 292.761 | Climbazole           |
| Chemicals | S4178 |                                                                                         |                 |         |                      |
| Selleck   |       | c1(O(C(N(C)C)=O)cc(C(O)CNC(C)(C)C)cc(OC(=O)N(C)C)c1.Cl                                  | C18H30ClN3O5    | 403.901 | Bambuterol HCl       |
| Chemicals | S4277 |                                                                                         |                 |         |                      |

|           |       |                                                                                                                                                               |                  |         |                                 |
|-----------|-------|---------------------------------------------------------------------------------------------------------------------------------------------------------------|------------------|---------|---------------------------------|
| Selleck   |       |                                                                                                                                                               |                  |         |                                 |
| Chemicals | S4188 | <chem>C(Oc1ccccc1C(O)=O)(=O)c2ccccc2O</chem>                                                                                                                  | C14H10O5         | 258.226 | Sasapyrine                      |
| Selleck   |       |                                                                                                                                                               |                  |         |                                 |
| Chemicals | S4288 | <chem>c1(N(CCC)CCC)ccc(CCCC(=O)O)cc1</chem>                                                                                                                   | C14H19Cl2NO2     | 304.212 | Chloroambucil                   |
| Selleck   |       |                                                                                                                                                               |                  |         |                                 |
| Chemicals | S4197 | <chem>C1(=O)NC(=O)CC(C)(CC)C1</chem>                                                                                                                          | C8H13NO2         | 155.194 | Bemegride                       |
| Selleck   |       |                                                                                                                                                               |                  |         |                                 |
| Chemicals | S4299 | <chem>c1cc2c(C(O)=C(CC3=C(O)c4c(cccc4)OC3=O)C(=O)O2)cc1</chem>                                                                                                | C19H12O6         | 336.295 | Dicoumarol                      |
| Selleck   |       |                                                                                                                                                               |                  |         |                                 |
| Chemicals | S4206 | <chem>C(N)CS.Cl</chem>                                                                                                                                        | C2H8CINS         | 113.61  | Cysteamine HCl                  |
| Selleck   |       |                                                                                                                                                               |                  |         |                                 |
| Chemicals | S4908 | <chem>c1(nc2c(cc(O)cc2)c3CC)c3CN4C1=CC5=C(CO C(=O)[C@]5(O)CC)C4=O</chem>                                                                                      | C22H20N2O5       | 392.405 | SN-38                           |
| Selleck   |       |                                                                                                                                                               |                  |         |                                 |
| Chemicals | S4216 | <chem>[C@]([H])(C(=O)CC1)[C@@]2(C)[C@H](O C(=O)CSC(C)(CNC(=O)[C@H](N)C(C)C)C[C@@](C)(C=C)[C@@H](O)[C@@H]3C)[C@@]13CC[C@H]2C.Cl</chem>                         | C31H53ClN2O5S    | 601.281 | Valnemulin HCl                  |
| Selleck   |       |                                                                                                                                                               |                  |         |                                 |
| Chemicals | S7015 | <chem>CN[C@@H](C)C(=O)N[C@H](C=O)N1C[C@H](O)C[C@H]1Cc2c3c(cc(F)cc3)[nH]c2c4c(C[C@H]5N(C(=O)[C@H](CC)NC(=O)[C@H](C)NC)C[C@H](O)C5)c6c(cc(F)cc6)[nH]4)CC</chem> | C42H56F2N8O6     | 806.941 | Birinapant                      |
| Selleck   |       |                                                                                                                                                               |                  |         |                                 |
| Chemicals | S4225 | <chem>c1(OCC(N)C)c(C)cccc1C.Cl</chem>                                                                                                                         | C11H18ClNO       | 215.72  | Mexiletine HCl                  |
| Selleck   |       |                                                                                                                                                               |                  |         |                                 |
| Chemicals | S7033 | <chem>n1c(N)c(c(c2ccc(N(C(Cc3nc(C)ccc3)=O)CC4)c4c2F)cn5C)c5nc1</chem>                                                                                         | C23H21FN6O       | 416.451 | GSK2656157                      |
| Selleck   |       |                                                                                                                                                               |                  |         |                                 |
| Chemicals | S4235 | <chem>c1ccc(N=Nc2ccc(N)nc2N)cc1.Cl</chem>                                                                                                                     | C11H12ClN5       | 249.699 | Phenazopyridine HCl             |
| Selleck   |       |                                                                                                                                                               |                  |         |                                 |
| Chemicals | S7050 | <chem>c1c(N2CCOC[C@H]2C)nc(c3c4c([nH]cc4)ccc3)nc1C5(CC5)S(=O)(=O)C</chem>                                                                                     | C21H24N4O3S      | 412.505 | AZ20                            |
| Selleck   |       |                                                                                                                                                               |                  |         |                                 |
| Chemicals | S4246 | <chem>Cl.c1cc([C@H]2C[C@@H]2N)ccc1</chem>                                                                                                                     | C9H12ClN         | 169.651 | Tranylcypromine (2-PCPA) HCl    |
| Selleck   |       |                                                                                                                                                               |                  |         |                                 |
| Chemicals | S7072 | <chem>[C@H](NC)(C(=O)O)CC(=O)O</chem>                                                                                                                         | C5H9NO4          | 147.129 | NMDA (N-Methyl-D-aspartic acid) |
| Selleck   |       |                                                                                                                                                               |                  |         |                                 |
| Chemicals | S4255 | <chem>c1(NC(C)CCN(CC)CC)c2c(cc(Cl)cc2)nc3c1cc(O)cc3.Cl.Cl</chem>                                                                                              | C23H32Cl3N3O     | 472.879 | Quinacrine 2HCl                 |
| Selleck   |       |                                                                                                                                                               |                  |         |                                 |
| Chemicals | S7088 | <chem>C1CN(C2CCN(C(c3ccc(C(N4CCC(N5CCCC5)CC4)=O)c(Nc6cccc6)c3)=O)CC2)CC1</chem>                                                                               | C32H43N5O2       | 529.716 | UNC1215                         |
| Selleck   |       |                                                                                                                                                               |                  |         |                                 |
| Chemicals | S7090 | <chem>C(N[C@@H](Cc1ccc(c2cn(c3n2)cccc3[C@@H](O)C)cc1)CNC(=O)CN(C)C(=O)c4ccc(O C(C)C)c(C)c4</chem>                                                             | C32H38ClN5O4     | 592.128 | GSK923295                       |
| Selleck   |       |                                                                                                                                                               |                  |         |                                 |
| Chemicals | S7251 | <chem>c1(C(F)(F)F)cc(c2nn(C=CC(=O)N3CC(F)(F)C3)cn2)cc(C(F)(F)F)c1</chem>                                                                                      | C16H10F8N4O      | 426.264 | KPT-276                         |
| Selleck   |       |                                                                                                                                                               |                  |         |                                 |
| Chemicals | S7099 | <chem>c1(N2CC[C@]3(O)C2=Nc4c(cc(C)cc4)C3=O)ccccc1</chem>                                                                                                      | C18H16N2O2       | 292.332 | (-)-Blebbistatin                |
| Selleck   |       |                                                                                                                                                               |                  |         |                                 |
| Chemicals | S7263 | <chem>c1cc2c(c(Sc3ccc(Cl)cc3)c(C)n2CC(O)=O)c(NC(=O)C)c1</chem>                                                                                                | C19H17ClN2O3S    | 388.868 | AZD1981                         |
| Selleck   |       |                                                                                                                                                               |                  |         |                                 |
| Chemicals | S7114 | <chem>C1CC(CO c2c(N=O)c(N)nc(N)n2)CCC1</chem>                                                                                                                 | C11H17N5O2       | 251.285 | NU6027                          |
| Selleck   |       |                                                                                                                                                               |                  |         |                                 |
| Chemicals | S7279 | <chem>c1cc2c(nc(N3CCN(C(=O)c4c(n5ncn5)ccc(C)c4)[C@H](C)CC3)o2)cc1Cl</chem>                                                                                    | C23H23ClN6O2     | 450.921 | Suvorexant (MK-4305)            |
| Selleck   |       |                                                                                                                                                               |                  |         |                                 |
| Chemicals | S7129 | <chem>N1C(=O)C(=Cc2ccc([N+])([O-])=O)o2)C(=O)N1c3ccc(C(OCC)=O)cc3</chem>                                                                                      | C17H13N3O7       | 371.301 | PYR-41                          |
| Selleck   |       |                                                                                                                                                               |                  |         |                                 |
| Chemicals | S7293 | <chem>c1c(C)nc(NS(=O)(=O)c2ccc(NC(=S)NC(=O)COc3ccc(Br)cc3Cl)cc2)nc1C</chem>                                                                                   | C21H19BrClN5O4S2 | 584.894 | ZCL278                          |
| Selleck   |       |                                                                                                                                                               |                  |         |                                 |
| Chemicals | S7139 | <chem>c1cc(C=C2SC(=S)N(c3cc(C(F)(F)F)ccc3)C2=O)ccc1C(=O)O</chem>                                                                                              | C18H10F3NO3S2    | 409.402 | CFT RinH-172                    |
| Selleck   |       |                                                                                                                                                               |                  |         |                                 |
| Chemicals | S7310 | <chem>c(cccc1)(c2c(cc(NC(=O)C(C)(C)C)cc2)C(=O)C3=O)c13</chem>                                                                                                 | C19H17NO3        | 307.343 | SF1670                          |
| Selleck   |       |                                                                                                                                                               |                  |         |                                 |
| Chemicals | S7149 | <chem>c1nc(C(C)=NNC(=S)N2CCC2)ccc1</chem>                                                                                                                     | C11H14N4S        | 234.321 | NSC 319726                      |
| Selleck   |       |                                                                                                                                                               |                  |         |                                 |
| Chemicals | S7327 | <chem>n1(c2ccc(OC)cc2)c(c3c([N+])([O-])=O)c1C)cc(O)cc3</chem>                                                                                                 | C16H14N2O4       | 298.293 | ID-8                            |
| Selleck   |       |                                                                                                                                                               |                  |         |                                 |
| Chemicals | S7167 | <chem>c1ccn2c(c(OC)c(C)c2C(c3cc(C(=O)O[Na])c(N)cc3)=O)c1</chem>                                                                                               | C18H15N2NaO4     | 346.312 | SSR128129E                      |
| Selleck   |       |                                                                                                                                                               |                  |         |                                 |
| Chemicals | S7340 | <chem>c1c(Cl)c(c2nc(N)nc(SCCCC(=O)N)n2)c3c(c4ccc3)c1COC4</chem>                                                                                               | C19H18ClN5O2S    | 415.897 | CH5138303                       |
| Selleck   |       |                                                                                                                                                               |                  |         |                                 |
| Chemicals | S7193 | <chem>C1C(=O)Nc2c(nc2)c3c1c4c(ccc(Br)c4)[nH]3</chem>                                                                                                          | C15H10BrN3O      | 328.163 | 1-Azakenpaulone                 |
| Selleck   |       |                                                                                                                                                               |                  |         |                                 |
| Chemicals | S7364 | <chem>CN(c1ccc(c2cccc(NC(N(C)C)=O)c2)cc1)C</chem>                                                                                                             | C17H21N3O        | 283.368 | Atglistatin                     |
| Selleck   |       |                                                                                                                                                               |                  |         |                                 |
| Chemicals | S7209 | <chem>c1(c2cccc2)cc3c([nH]cc3c4ccc(C(O)=O)c(C5CCCC5)c4)nc1</chem>                                                                                             | C25H22N2O2       | 382.454 | GSK650394                       |

|           |       |                                                                                                                                                                                                     |                |         |                          |
|-----------|-------|-----------------------------------------------------------------------------------------------------------------------------------------------------------------------------------------------------|----------------|---------|--------------------------|
| Selleck   |       |                                                                                                                                                                                                     |                |         |                          |
| Chemicals | S7378 | <chem>c1c(S(=O)(=O)F)ccc(CCN)c1.Cl</chem>                                                                                                                                                           | C8H11ClFNO2S   | 239.695 | AEBSF HCl                |
| Selleck   |       |                                                                                                                                                                                                     |                |         |                          |
| Chemicals | S7229 | <chem>c1(NC(=O)C=Cc2cn(CC=Cc3ccccc3)nc2)c(N)cc(F)cc1</chem>                                                                                                                                         | C21H19FN4O     | 362.4   | RGFP966                  |
| Selleck   |       |                                                                                                                                                                                                     |                |         |                          |
| Chemicals | S7399 | <chem>CC(NC1=C(C(=O)CC(C)(C)C1)C2c3ccc([N+])([O-])=O)cc3)=C2C(OC4CCCCC4)=O</chem>                                                                                                                   | C25H30N2O5     | 438.516 | FLI-06                   |
| Selleck   |       |                                                                                                                                                                                                     |                |         |                          |
| Chemicals | S7430 | <chem>c1cc(Oc2ccc(S(=O)(=O)CC3CS3)cc2)ccc1</chem>                                                                                                                                                   | C15H14O3S2     | 306.4   | SB-3CT                   |
| Selleck   |       |                                                                                                                                                                                                     |                |         | PRT062607 (P505-15,      |
| Chemicals | S8032 | <chem>n1cc(C(=O)N)c(Nc2cccc(n3ncnc3)c2)nc1N[C@H]4[C@H](N)CCCC4.Cl</chem>                                                                                                                            | C19H24ClN9O    | 429.907 | BIIB057) HCl             |
| Selleck   |       |                                                                                                                                                                                                     |                |         |                          |
| Chemicals | S7448 | <chem>[Ru]1(Cl)(OC(=O)CN1)(C=O)(C=O)C=O.[R]</chem>                                                                                                                                                  | C5H6ClNO5RRu   | 296.628 | CORM-3                   |
| Selleck   |       |                                                                                                                                                                                                     |                |         |                          |
| Chemicals | S8042 | <chem>n1c(N)c(Cc2cc(OC)c(OCc3ccc(OC)cc3)cc2)cnc1N</chem>                                                                                                                                            | C20H22N4O3     | 366.414 | GW2580                   |
| Selleck   |       |                                                                                                                                                                                                     |                |         |                          |
| Chemicals | S7461 | <chem>c1ccc(Nc2ncnc(c3c(OC)ccc3)c2)cc1CS(=O)(=O)N</chem>                                                                                                                                            | C18H18N4O3S    | 370.426 | LDC000067                |
| Selleck   |       |                                                                                                                                                                                                     |                |         |                          |
| Chemicals | S8057 | <chem>c1c2nc(Nc3cc(c(OCN4CCCC4)cc3)COCC=CCOCc5cc2ccc5)nc1</chem>                                                                                                                                    | C28H32N4O3     | 472.579 | Pacritinib (SB1518)      |
| Selleck   |       |                                                                                                                                                                                                     |                |         |                          |
| Chemicals | S7489 | <chem>c1cc(Cl)ccc1CN(C=O)C(c2c3c(cc(Cl)cc3)[nH]c2C(=O)OCC)C(NC(C)(C)C)=O</chem>                                                                                                                     | C25H27Cl2N3O4  | 504.406 | YH239-EE                 |
| Selleck   |       |                                                                                                                                                                                                     |                |         |                          |
| Chemicals | S8077 | <chem>c1(Cl)c(Cl)ccc(N2C(=O)C(Cl)=C(N3CCOCC3)C2=O)c1</chem>                                                                                                                                         | C14H11Cl3N2O3  | 361.608 | RI-1                     |
| Selleck   |       |                                                                                                                                                                                                     |                |         |                          |
| Chemicals | S7505 | <chem>CC(OCc1cc(c2cnn(C3CCNCC3)c2)cnc1N)c4c(Cl)c(F)ccc4Cl</chem>                                                                                                                                    | C21H22Cl2FN5O  | 450.337 | (S)-crizotinib           |
| Selleck   |       |                                                                                                                                                                                                     |                |         |                          |
| Chemicals | S7520 | <chem>C1(=O)C2=C(C(CCC2)N(CC(=O)N(CCN(CC)CC)Cc3ccc(c4ccc(C(F)(F)F)cc4)cc3)C(SCc5ccc(F)cc5)=N1</chem>                                                                                                | C36H38F4N4O2S  | 666.771 | Darapladib (SB-480848)   |
| Selleck   |       |                                                                                                                                                                                                     |                |         |                          |
| Chemicals | S7546 | <chem>c1ccc(c2ccc(CC(=O)N(C)c3nc(C)c(S(N)(=O)=O)s3)cc2)nc1</chem>                                                                                                                                   | C18H18N4O3S2   | 402.491 | Pritelivir (BAY 57-1293) |
| Selleck   |       |                                                                                                                                                                                                     |                |         |                          |
| Chemicals | S7635 | <chem>N1(CCCCC2(C(NCC(F)(F)F)=O)c3c(cccc3)c4c2cccc4)CCC(NC(=O)c5ccccc5c6ccc(C(F)(F)F)cc6)CC1</chem>                                                                                                 | C39H37F6N3O2   | 693.72  | Lomitapide               |
| Selleck   |       |                                                                                                                                                                                                     |                |         |                          |
| Chemicals | S8007 | <chem>c1(C(Nc2cccc2)=O)nc(c3ccc(S(C)(=O)=O)cc3)cnc1N</chem>                                                                                                                                         | C18H16N4O3S    | 368.41  | VE-821                   |
| Selleck   |       |                                                                                                                                                                                                     |                |         | Vortioxetine (Lu         |
| Chemicals | S8021 | <chem>c1(C)cc(C)c(Sc2c(N3CCNCC3)cccc2)cc1.Br</chem>                                                                                                                                                 | C18H23BrN2S    | 379.358 | AA21004) HBr             |
| Selleck   |       |                                                                                                                                                                                                     |                |         |                          |
| Chemicals | S7091 | <chem>[C@H]1(C)[C@]2(O)O[C@H](C[C@H](OC)C(C)=CC=CC[C@H](C)C[C@H](C)C(=O)[C@H](OC)[C@H](O)C(C)=C[C@H](C)C(=O)C[C@H](C)[C@H]3C[C@H](OC)[C@H](n4cnnn4)CC3)OC(=O)[C@]5([H])N(CCCC5)C(=O)C2=O)CC1</chem> | C52H79N5O12    | 966.21  | Zotatarlimus (ABT-578)   |
| Selleck   |       |                                                                                                                                                                                                     |                |         |                          |
| Chemicals | S7252 | <chem>c1(C(F)(F)F)cc(c2nn(C=CC(NNc3ncnc3)=O)cn2)cc(C(F)(F)F)c1</chem>                                                                                                                               | C17H11F6N7O    | 443.306 | KPT-330                  |
| Selleck   |       |                                                                                                                                                                                                     |                |         |                          |
| Chemicals | S7102 | <chem>n1c(N)c(c2onc(c3ccc(CNC)cc3)c2)nc(c4ccc(S(C(C)C)(=O)=O)cc4)c1</chem>                                                                                                                          | C24H25N5O3S    | 463.552 | VE-822                   |
| Selleck   |       |                                                                                                                                                                                                     |                |         |                          |
| Chemicals | S7265 | <chem>C1CCC(C(NC(c2ccc(F)cc2)c3ccc(F)cc3)=O)(NC(=O)[C@H](CCCNC(=N)N)NC(C(C)C)C)C(=O)=O)C1</chem>                                                                                                    | C35H49F2N7O4   | 669.805 | MM-102                   |
| Selleck   |       |                                                                                                                                                                                                     |                |         |                          |
| Chemicals | S7115 | <chem>c1(C(F)(F)F)ccc(c2cc(OCc3c4c(sc(NC(=O)C)n4)ccc3)ncn2)cc1</chem>                                                                                                                               | C20H13F3N4O2S  | 430.403 | AMG-517                  |
| Selleck   |       |                                                                                                                                                                                                     |                |         |                          |
| Chemicals | S7280 | <chem>C(=O)C(=O)Nc1ncc(Cl)cc1N[C@H]2CC[C@H](C(=O)N(C)C)C[C@H]2NC(=O)c3sc4c(CCN(C)C4)n3</chem>                                                                                                       | C24H30ClN7O4S  | 548.058 | Edoxaban                 |
| Selleck   |       |                                                                                                                                                                                                     |                |         |                          |
| Chemicals | S7130 | <chem>c1(SC#N)cc(SC#N)c(N)nc1N</chem>                                                                                                                                                               | C7H5N5S2       | 223.278 | PR-619                   |
| Selleck   |       |                                                                                                                                                                                                     |                |         |                          |
| Chemicals | S7295 | <chem>c1(OC)cc2c(C(=O)NCC(c3cc(C)c(OCOC)c(C)c3)=N2)c(OC)c1</chem>                                                                                                                                   | C20H22N2O5     | 370.399 | RVX-208                  |
| Selleck   |       |                                                                                                                                                                                                     |                |         |                          |
| Chemicals | S7140 | <chem>c1(Cl)c(Cl)c2c(C(=O)CC2=O)c(Cl)c1Cl</chem>                                                                                                                                                    | C9H2Cl4O2      | 283.923 | TCID                     |
| Selleck   |       |                                                                                                                                                                                                     |                |         |                          |
| Chemicals | S7316 | <chem>c1ccc(CNC(=O)c2ccc(c3nc(CS(=O)(=O)c4ccc(C)cc4)c(C)cc3)cc2)cn1</chem>                                                                                                                          | C25H23N3O4S    | 461.533 | STF-118804               |
| Selleck   |       |                                                                                                                                                                                                     |                |         |                          |
| Chemicals | S7152 | <chem>Cc1cc(c2cc(C=C3C(=O)N(c4ccc(C(O)=O)cc4)N=C3C)cc2)c([N+])([O-])=O)cc1C</chem>                                                                                                                  | C24H19N3O6     | 445.424 | C646                     |
| Selleck   |       |                                                                                                                                                                                                     |                |         |                          |
| Chemicals | S7329 | <chem>c1ccc(OC2ccc(CNC(=O)c3nc(c4cc(Br)c(O)c(Br)c4)nc3)cc2)cc1</chem>                                                                                                                               | C22H15Br2N3O4  | 545.18  | IOWH032                  |
| Selleck   |       |                                                                                                                                                                                                     |                |         |                          |
| Chemicals | S7172 | <chem>N(C(=O)CN1CCOCC1)[C@H](C)C(=O)N[C@H](Cc2ccc(OC)cc2)C(=O)N[C@H](Cc3ccccc3)C(=O)[C@]4(C)CO4</chem>                                                                                              | C31H40N4O7     | 580.672 | ONX-0914 (PR-957)        |
| Selleck   |       |                                                                                                                                                                                                     |                |         |                          |
| Chemicals | S7351 | <chem>c1(NCCCc2ccccc2)ccc(C)cc1N</chem>                                                                                                                                                             | C16H20N2       | 240.343 | JSH-23                   |
| Selleck   |       |                                                                                                                                                                                                     |                |         |                          |
| Chemicals | S7194 | <chem>c1c(C)c(C#Cc2cnc3c(c[nH]3)c2)cc(C(=O)Nc4ccc(CN5CCN(C)CC5)c(C(F)(F)F)c4)c1.CS(O)(=O)=O.CS(O)(=O)=O</chem>                                                                                      | C31H35F3N6O7S2 | 724.771 | GZD824                   |
| Selleck   |       |                                                                                                                                                                                                     |                |         |                          |
| Chemicals | S7365 | <chem>c1cc(C(=O)c2ccc(OC(CN3CCN(Cc4ccccc4)CC3)=O)cc2)ccc1</chem>                                                                                                                                    | C27H28N2O3     | 428.523 | AdipoRon                 |

|                      |       |                                                                                                                                                                                                                                    |                  |          |                                        |
|----------------------|-------|------------------------------------------------------------------------------------------------------------------------------------------------------------------------------------------------------------------------------------|------------------|----------|----------------------------------------|
| Selleck<br>Chemicals | S7213 | <chem>[C@H]1(CO)O[C@@]2([H])[C@]([H])(N=C(NCC)S2)[C@@H](O)[C@@H]1O</chem>                                                                                                                                                          | C9H16N2O4S       | 248.299  | Thiamet G                              |
| Selleck<br>Chemicals | S7379 | <chem>c1c(O)c2c([C@H](C)[C@]3([H])C=C(O)[C@@]4(O)[C@]([H])([C@H](N(C)C)C(O)=C(C(N)=O)C4=O)[C@H]3O)C2=O)cc1.c5c(O)c6c([C@H](C)[C@]7([H])C=C(O)[C@@]8(O)[C@]([H])([C@H](N(C)C)C(O)=C(C(N)=O)C8=O)[C@H]7O)C6=O)cc5.Cl.O.CCO.Cl</chem> | C46H58Cl2N4O18   | 1025.875 | E-64                                   |
| Selleck<br>Chemicals | S7233 | <chem>c1c(c2cc(NC(OCC)=O)c3n(c(C)nn3)n2)cc(NS(=O)(=O)C)c(C)c1</chem>                                                                                                                                                               | C17H20N6O4S      | 404.443  | Bromosporine<br>Caffeic Acid Phenethyl |
| Selleck<br>Chemicals | S7414 | <chem>C(OCCc1cccc1)(=O)C=Cc2ccc(O)c(O)c2</chem>                                                                                                                                                                                    | C17H16O4         | 284.307  | Ester                                  |
| Selleck<br>Chemicals | S7434 | <chem>c1cc2c(cc(C[C@H](NC(=O)C(CC(=O)NO)CC(C)C)C(=O)N[C@@H](C)C(=O)NCCN)cc2)cc1</chem>                                                                                                                                             | C26H37N5O5       | 499.602  | TAPI-1                                 |
| Selleck<br>Chemicals | S8034 | <chem>c1cc(NC(=O)C)c2c(C(=O)N[C@H](CS(=O)C(=O)c3ccc(OC)c(OCC)c3)C2=O)c1</chem>                                                                                                                                                     | C22H24N2O7S      | 460.5    | Apremilast (CC-10004)                  |
| Selleck<br>Chemicals | S7449 | <chem>c1cc([N+])([O-])=O)c2c(cc(C(O)=O)[nH]2)c1</chem>                                                                                                                                                                             | C9H6N2O4         | 206.155  | CRT0044876                             |
| Selleck<br>Chemicals | S8043 | <chem>c1c2c(c3C(=O)N(CCCCCC(=O)NO)C2=O)c(ccc3)cc1</chem>                                                                                                                                                                           | C18H18N2O4       | 326.347  | Scriptaid                              |
| Selleck<br>Chemicals | S7462 | <chem>c1cc(OCC(=O)N(C(C)C)Cc2onc(c3cnccc3)n2)ccc1CCC</chem>                                                                                                                                                                        | C22H26N4O3       | 394.467  | PI-1840                                |
| Selleck<br>Chemicals | S8058 | <chem>c1ccc(C(Oc2c(c(O)cc(O)c2[C@H]3CCN(C)[C@H]3CO)C4=O)=C4)c(Cl)c1.Cl</chem>                                                                                                                                                      | C21H21Cl2NO5     | 438.301  | P276-00                                |
| Selleck<br>Chemicals | S7490 | <chem>c1cc2c(c3C(=O)N(CCCSc4nnc(c5cncnc5)n4c6ccc(OC)cc6)C2=O)c(ccc3)c1</chem>                                                                                                                                                      | C29H23N5O3S      | 521.59   | WIKI4                                  |
| Selleck<br>Chemicals | S8078 | <chem>C1[C@@]([H])([C@]2(C(O)C)CCC1(C)C)[C@@]([H])([C@]3(C)CC2)C(=O)C=C([C@]34C)[C@@]([C@]5([H])CC4)C=C(C#N)C(=O)C5(C)</chem>                                                                                                      | C32H43NO4        | 505.688  | Bardoxolone Methyl                     |
| Selleck<br>Chemicals | S7508 | <chem>C1Cc2c(sc(NC(=O)c3c4c(cccc4)ccc3)c2C#N)OC1</chem>                                                                                                                                                                            | C20H16N2OS       | 332.419  | JNK Inhibitor IX                       |
| Selleck<br>Chemicals | S7523 | <chem>C1N(c2ccc(Nc3c4n(ccn4)cc(c5ccc6c([nH]nc6)c5)n3)cc2)CCOC1</chem>                                                                                                                                                              | C23H21N7O        | 411.459  | GS-9973                                |
| Selleck<br>Chemicals | S7565 | <chem>c1(O)c(N(c2nc(Nc3ccc(N4CCN(C)CC4)cc3)nc2)C(Oc5c(C)cccc5C)=O)cc(c(OC)c1</chem>                                                                                                                                                | C32H36N6O4       | 568.666  | WH-4-023                               |
| Selleck<br>Chemicals | S8000 | <chem>c1cc(C(=O)NC(=S)Nc2ccc(NC(=O)C)cc2)ccc1C(C)C</chem>                                                                                                                                                                          | C20H23N3O2S      | 369.481  | Tenovin-1                              |
| Selleck<br>Chemicals | S8009 | <chem>c1(ccc(O)c(O)c1)C=C(C#N)C#N</chem>                                                                                                                                                                                           | C10H6N2O2        | 186.167  | AG-18                                  |
| Selleck<br>Chemicals | S8022 | <chem>[C@H]1(CO)O[C@@H](c2ccc(Cl)c(Cc3ccc(O[C@H]4COCC4)cc3)c2)[C@H](O)[C@@H](O)[C@H]1O</chem>                                                                                                                                      | C23H27ClO7       | 450.909  | Empagliflozin (BI 10773)               |
| Selleck<br>Chemicals | S7092 | <chem>c1c(n2(C)c(C(=NN3CCN(Cc4ccccc4)CC3)c(C)n2)cccc1</chem>                                                                                                                                                                       | C23H27N5         | 373.494  | SANT-1                                 |
| Selleck<br>Chemicals | S7253 | <chem>c1nc(N)c(C(Nc2ccnc2)=O)nc1c3ccc(S(N4CCN(C)CC4)(=O)=O)cc3</chem>                                                                                                                                                              | C21H23N7O3S      | 453.517  | AZD2858                                |
| Selleck<br>Chemicals | S7104 | <chem>c1c(C=C2SC(=O)NC2=O)c(N3CCC[C@@H](N)C3)c(c4ccccc4)cc1</chem>                                                                                                                                                                 | C21H21N3O2S      | 379.475  | AZD1208                                |
| Selleck<br>Chemicals | S7266 | <chem>n1cc(C2[C@]3([H])[C@]([H])(C=CC3)c4c(c(F)cc(F)c4)N2)ccc1</chem>                                                                                                                                                              | C17H14F2N2       | 284.303  | Golgicide A<br>3-Deazaneplanocin A     |
| Selleck<br>Chemicals | S7120 | <chem>c1cc2c(ncn2[C@H]3[C@@H](O)[C@H](O)C(CO)=C3)c(N)n1</chem>                                                                                                                                                                     | C12H14N4O3       | 262.265  | (DZNeP)                                |
| Selleck<br>Chemicals | S7282 | <chem>CN1CCC(NC(C(NO)C2=C3C(Oc4ccc([N+])([O-])=O)cc4)=CC(=O)C=C3O)=C2)O)CC1</chem>                                                                                                                                                 | C22H22N4O7       | 454.433  | NMS-E973                               |
| Selleck<br>Chemicals | S7132 | <chem>c1c([N+])([O-])=O)c(Sc2c(Cl)c(Cl)ccc2)sc1C(C)=O</chem>                                                                                                                                                                       | C12H7Cl2NO3S2    | 348.225  | P5091 (P005091)                        |
| Selleck<br>Chemicals | S7297 | <chem>c1c(c2c3c(cccc3)n(C)c2)nc(Nc4cc(NC(=O)C=C)c(N(C)CCN(C)C)cc4O)nc1</chem>                                                                                                                                                      | C28H33N7O2       | 499.607  | AZD9291                                |
| Selleck<br>Chemicals | S7142 | <chem>Cc1ccc(S(c2cc([N+])([O-])=O)cc2)(=O)=O)cc1</chem>                                                                                                                                                                            | C11H9NO5S        | 267.258  | NSC697923                              |
| Selleck<br>Chemicals | S7317 | <chem>n1cc(Cl)c(Oc2cccc(NC(=O)CC)c2)nc1Nc3ccc(N4CCN(C)CC4)cc3OC</chem>                                                                                                                                                             | C25H29ClN6O3     | 496.989  | WZ4003                                 |
| Selleck<br>Chemicals | S7153 | <chem>c1cc(C=C2SC(=S)NC2=O)ccc1CC</chem>                                                                                                                                                                                           | C12H11NOS2       | 249.352  | 10058-F4                               |
| Selleck<br>Chemicals | S7330 | <chem>c1(Cl)ccc(SCC(=O)N2CCC(C(=O)NCCSSCCN(C)C)CC2)cc1.C(C(O)=O)(F)(F)F</chem>                                                                                                                                                     | C22H31ClF3N3O4S3 | 590.142  | 6H05                                   |
| Selleck<br>Chemicals | S7173 | <chem>c1(F)c(Nc2cccc(NC(=O)C=C)c2)nc(Nc3ccc(OCCOC)cc3)nc1</chem>                                                                                                                                                                   | C22H22FN5O3      | 423.44   | AVL-292                                |
| Selleck<br>Chemicals | S7353 | <chem>C(CN(C(C)C)C[C@H]1O[C@@H](n2ccc3c2ncn3N)[C@H](O)[C@@H]1O)CNC(=O)Nc4ccc(C(C)C)cc4</chem>                                                                                                                                      | C28H41N7O4       | 539.67   | EPZ004777                              |
| Selleck<br>Chemicals | S7195 | <chem>c1cc(c2csc(NC(=O)NCCc3cc(O)ccc3)n2)ccn1</chem>                                                                                                                                                                               | C16H14N4O2S      | 326.373  | RKI-1447                               |

|           |       |                                                                                                                                                                  |                |         |                          |
|-----------|-------|------------------------------------------------------------------------------------------------------------------------------------------------------------------|----------------|---------|--------------------------|
| Selleck   |       |                                                                                                                                                                  |                |         |                          |
| Chemicals | S7367 | <chem>n1cc(C(F)(F)F)c(NC)nc1Nc2c(C)nn(C(C)(C)C#N)c2</chem>                                                                                                       | C14H16F3N7     | 339.319 | GNE-0877                 |
| Selleck   |       |                                                                                                                                                                  |                |         |                          |
| Chemicals | S7214 | <chem>c(cc(Nc1ccc(F)cc1F)cc2)(CCc3c(cc(OC[C@H](O)CO)cc3)C4=O)c24</chem>                                                                                          | C24H21F2NO4    | 425.425 | Skepinone-L              |
| Selleck   |       |                                                                                                                                                                  |                |         |                          |
| Chemicals | S7380 | <chem>C(C[C@@H](C(=O)N)[C@H](C(=O)N)[C@H](C([H])=O)CCCNC(=N)N)CC(C)C)NC(=O)C(C)C.[R]</chem>                                                                      | C20H38N6O4R    | 426.554 | Leupeptin Hemisulfate    |
| Selleck   |       |                                                                                                                                                                  |                |         |                          |
| Chemicals | S7234 | <chem>c1nc2c(c(C(=O)O)ccc2O)cc1</chem>                                                                                                                           | C10H7NO3       | 189.167 | IOX1                     |
| Selleck   |       |                                                                                                                                                                  |                |         |                          |
| Chemicals | S7417 | <chem>Cl.Cl.n1c(N(C)C)c2c(n([C@@H]3O[C@@H](CO)[C@H](NC(=O)[C@@H](N)Cc4ccc(OC)cc4)[C@@H]3O)cn2)nc1</chem>                                                         | C22H31Cl2N7O5  | 544.431 | Puromycin 2HCl           |
| Selleck   |       |                                                                                                                                                                  |                |         |                          |
| Chemicals | S7435 | <chem>c1nc(NC(=O)NCc2ccc(OC)cc2)sc1[N+][I-](O-)=O</chem>                                                                                                         | C12H12N4O4S    | 308.313 | AR-A014418               |
| Selleck   |       |                                                                                                                                                                  |                |         |                          |
| Chemicals | S8035 | <chem>c1nc(C(=O)Nc2ccc(S(Nc3ccccc3Cl))(=O)=O)c(Cl)c2)ccc1</chem>                                                                                                 | C18H13Cl2N3O3S | 422.285 | VU 0364439               |
| Selleck   |       |                                                                                                                                                                  |                |         |                          |
| Chemicals | S7450 | <chem>CC(Nc1ccc(Cc2ccc(NC(C)=O)cc2)cc1)=O</chem>                                                                                                                 | C17H18N2O2     | 282.337 | FH1(BRD-K4477)           |
| Selleck   |       |                                                                                                                                                                  |                |         |                          |
| Chemicals | S8044 | <chem>c1(C)cc2c(nc(NCCN)c3n2c(C)cn3)cc1</chem>                                                                                                                   | C14H17N5       | 255.318 | BMS-345541               |
| Selleck   |       |                                                                                                                                                                  |                |         |                          |
| Chemicals | S7467 | <chem>C1N(Cc2c(c3c(c4ccc3)cccc4)cn(Cc5n(Cc6ccc(Br)cc6)cnc5)c2)=O)COC1N1(C(=O)N2CCNC(=O)C2)[C@@H](c3ccc(Cl)cc3)[C@H](c4ccc(Cl)cc4)N=C1c5c(OC(C)C)cc(OC)cc5</chem> | C30H27BrN4O2   | 555.465 | LB42708                  |
| Selleck   |       |                                                                                                                                                                  |                |         |                          |
| Chemicals | S8059 | <chem>C1c5c(OC(C)C)cc(OC)cc5</chem>                                                                                                                              | C30H30Cl2N4O4  | 581.49  | Nutlin-3a                |
| Selleck   |       |                                                                                                                                                                  |                |         |                          |
| Chemicals | S7493 | <chem>C(=O)(c1cccc1)Nc2nc(c3ccc(C)cc3C)cs2</chem>                                                                                                                | C18H16N2OS     | 308.397 | INH1                     |
| Selleck   |       |                                                                                                                                                                  |                |         |                          |
| Chemicals | S7509 | <chem>Cc1oc(CNc2c3c(ccc(c4oc(CO)cc4)c3)ncn2)cc1</chem>                                                                                                           | C19H17N3O3     | 335.357 | ML167                    |
| Selleck   |       |                                                                                                                                                                  |                |         |                          |
| Chemicals | S7525 | <chem>C1N(c2cc(OCC)c(Nc3ncc4c(N(C)C)c5c(cccc5)C(=O)N4C)n3)cc2)CCC(O)C1</chem>                                                                                    | C26H30N6O3     | 474.555 | XMD8-92                  |
| Selleck   |       |                                                                                                                                                                  |                |         |                          |
| Chemicals | S7566 | <chem>C1(=O)N(C)C(=O)C(NCCc2ccc(F)cc2)=C1c3c(C)[nH]c4c3cccc4</chem>                                                                                              | C22H20FN3O2    | 377.412 | IM-12                    |
| Selleck   |       |                                                                                                                                                                  |                |         |                          |
| Chemicals | S8001 | <chem>c1cc(Nc2ncc(C(NCCCCC(=O)NO)=O)cn2)c3cccc3)ccc1</chem>                                                                                                      | C24H27N5O3     | 433.503 | Rocilinostat (ACY-1215)  |
| Selleck   |       |                                                                                                                                                                  |                |         |                          |
| Chemicals | S8010 | <chem>C(O)(=O)C=CC(O)=O.C(#N)c1cc(CN2CCC(Nc3ncc4c3cc(Cl)s4)CC2)ccc1F</chem>                                                                                      | C23H21ClFN5O4S | 517.96  | PRX-08066 Maleic acid    |
| Selleck   |       |                                                                                                                                                                  |                |         |                          |
| Chemicals | S8023 | <chem>c(CCCC1)(sc(NC(=O)c2ccc(OC)c(OC)c2)c3C(N)=O)c13</chem>                                                                                                     | C18H20N2O4S    | 360.427 | TCS 359                  |
| Selleck   |       |                                                                                                                                                                  |                |         |                          |
| Chemicals | S7093 | <chem>S(c1c(c2ccc1O)cccc2)Sc3c(c4ccc3O)cccc4</chem>                                                                                                              | C20H14O2S2     | 350.454 | IPA-3                    |
| Selleck   |       |                                                                                                                                                                  |                |         |                          |
| Chemicals | S7255 | <chem>c1(OC(F)(F)F)c(Nc2ncc3c(c4c(c(C(=O)N)nn4CCO)CC3)n2)cc(N5CCN(C)CC5)cc1</chem>                                                                               | C24H27F3N8O3   | 532.518 | NMS-P937<br>(NMS1286937) |
| Selleck   |       |                                                                                                                                                                  |                |         |                          |
| Chemicals | S7106 | <chem>c([nH]cc1c2nc(Nc3ccc(N4CCC(N)CC4)cc3OC)ncc2Cl)(cccc5)c15</chem>                                                                                            | C24H25ClN6O    | 448.948 | AZD3463                  |
| Selleck   |       |                                                                                                                                                                  |                |         |                          |
| Chemicals | S7269 | <chem>C1(=O)N(C)C2C(C=NC(Nc3cc(SC)ccc3)=N2)C=C1c4c(Cl)cccc4Cl</chem>                                                                                             | C21H18Cl2N4OS  | 445.365 | PD173955                 |
| Selleck   |       |                                                                                                                                                                  |                |         |                          |
| Chemicals | S7122 | <chem>c1(N(C2CC3)C3CC(NC(c4c(C)cc(C(=O)N)c(N[C@H](C)CC)c4)=O)C2)ccc(C(C5CC5)=O)cn1</chem>                                                                        | C29H37N5O3     | 503.636 | XL888                    |
| Selleck   |       |                                                                                                                                                                  |                |         |                          |
| Chemicals | S7284 | <chem>c1(C(F)(F)F)c(Nc2cc(NC(C=O)O)ccc2)nc(Nc3ccc(N4CCN(C(=O)C)CC4)c3OC)nc1</chem>                                                                               | C27H28F3N7O3   | 555.552 | CO-1686 (AVL-301)        |
| Selleck   |       |                                                                                                                                                                  |                |         |                          |
| Chemicals | S7133 | <chem>c1c([N+][O-])=O)c(Sc2c(F)cc(F)cc2)sc1C(C)=O</chem>                                                                                                         | C12H7F2NO3S2   | 315.316 | P22077                   |
| Selleck   |       |                                                                                                                                                                  |                |         |                          |
| Chemicals | S7300 | <chem>c1(cc(NC(=O)CN(C)C)cc2)c2NC(=O)c3c1cccc3.Cl</chem>                                                                                                         | C17H18ClN3O2   | 331.797 | PJ34 HCl                 |
| Selleck   |       |                                                                                                                                                                  |                |         |                          |
| Chemicals | S7143 | <chem>c1(c2cc(C)nc2)nc(C(C(=O)Nc3ncc(c4nccnc4)cc3)cc1C</chem>                                                                                                    | C23H20N6O      | 396.444 | LGK-974                  |
| Selleck   |       |                                                                                                                                                                  |                |         |                          |
| Chemicals | S7319 | <chem>c1(NCCCN2CCOCC2)nccc(Nc3cc(c4cc3)c(c5n4CC)cccc5)n1</chem>                                                                                                  | C25H30N6O      | 430.545 | EHop-016                 |
| Selleck   |       |                                                                                                                                                                  |                |         |                          |
| Chemicals | S7155 | <chem>ONC(=O)[C@@H](CS)c1cccs1)[C@H](CC(C)C)C(=O)N[C@H](Cc2ccccc2)C(NC)=O</chem>                                                                                 | C23H31N3O4S2   | 477.64  | Batimastat (BB-94)       |
| Selleck   |       |                                                                                                                                                                  |                |         |                          |
| Chemicals | S7332 | <chem>c1(Cl)cc(OC)c(NCC(=O)N2CCC(NS(=O)(=O)C=C)CC2)cc11</chem>                                                                                                   | C16H21ClIN3O4S | 513.778 | K-Ras(G12C) inhibitor 9  |
| Selleck   |       |                                                                                                                                                                  |                |         |                          |
| Chemicals | S7176 | <chem>c1(csc(Nc2ccc(O)cc2)n1)c3ccc(Cl)cc3</chem>                                                                                                                 | C15H11ClN2OS   | 302.779 | SKI II                   |
| Selleck   |       |                                                                                                                                                                  |                |         |                          |
| Chemicals | S7355 | <chem>c(ccc(Cl)c1)(C(=O)N(Nc2ccccc2)C([C@@H](CC#C)N(CCCN)C(c3c(F)c(Cl)cc3)=O)=N4)c14</chem>                                                                      | C28H24Cl2FN5O2 | 552.427 | ARQ 621                  |
| Selleck   |       |                                                                                                                                                                  |                |         |                          |
| Chemicals | S7198 | <chem>c1cc2c(NC(=C3c4c(cc(Br)cc4)NC3=O)C2=NO)cc1</chem>                                                                                                          | C16H10BrN3O2   | 356.173 | BIO                      |
| Selleck   |       |                                                                                                                                                                  |                |         |                          |
| Chemicals | S7368 | <chem>n1cc(C(F)(F)F)c(NC)nc1Nc2cnn([C@@H]3[C@H](F)CN(C4COC4)CC3)c2Cl</chem>                                                                                      | C17H20ClF4N7O  | 449.834 | GNE-9605                 |

|           |       |                                                                                                                                 |                 |         |                                 |
|-----------|-------|---------------------------------------------------------------------------------------------------------------------------------|-----------------|---------|---------------------------------|
| Selleck   |       |                                                                                                                                 |                 |         | Losmapimod                      |
| Chemicals | S7215 | <chem>c1(C(=O)NC2CC2)cc(c3ncc(C(=O)NCC(C)(C)C)cc3)c(C)C(F)c1</chem>                                                             | C22H26FN3O2     | 383.459 | (GW856553X)                     |
| Selleck   |       | <chem>c1cc2c(c(C[C@H](NC(=O)[C@H](CC(C)C)NP(=O)(O)O)[C@@H]3O[C@@H](C)[C@H](O)[C@@H](O)[C@H]3O)C(O)=O)c[nH]2)cc1.[Na][Na]</chem> | C23H34N3Na2O10P | 589.483 | Phosphoramidon<br>Disodium Salt |
| Chemicals | S7237 | <chem>C1C(N)C1c2ccc(c3ccccc(O)c3)cc2</chem>                                                                                     | C15H15NO        | 225.286 | OG-L002                         |
| Selleck   |       |                                                                                                                                 |                 |         |                                 |
| Chemicals | S7421 | <chem>c1c(Nc2[nH]nc(c23)ncnc3N)ccc(F)c1</chem>                                                                                  | C11H9FN6        | 244.228 | CGP 57380                       |
| Selleck   |       |                                                                                                                                 |                 |         |                                 |
| Chemicals | S7436 | <chem>CCCCCCCCCCCCCCCCn1c(C)[n+](Cc2ccccc2)cc1.[I-]</chem>                                                                      | C27H45IN2       | 524.564 | NH125                           |
| Selleck   |       |                                                                                                                                 |                 |         |                                 |
| Chemicals | S8036 | <chem>c1(C(=O)C=Cc2ccc(O)c(O)c2)ccc(O)cc1O</chem>                                                                               | C15H12O5        | 272.253 | Butein                          |
| Selleck   |       |                                                                                                                                 |                 |         |                                 |
| Chemicals | S7451 | <chem>Cc1ccc(Cl)cc1N(S(C)(=O)=O)CC(Nc2c(F)cccc2F)=O</chem>                                                                      | C16H15ClF2N2O3S | 388.817 | FPH1 (BRD-6125)                 |
| Selleck   |       |                                                                                                                                 |                 |         |                                 |
| Chemicals | S8047 | <chem>c1(O)ccc(C=NNC(c2cc3c(cccc3)cc2O)=O)cc1O</chem>                                                                           | C18H14N2O4      | 322.315 | Dynasore                        |
| Selleck   |       |                                                                                                                                 |                 |         |                                 |
| Chemicals | S7470 | <chem>c1cnc(C=NNC(N)=S)c(N)c1</chem>                                                                                            | C7H9N5S         | 195.245 | Triapine                        |
| Selleck   |       | <chem>c1(O)cc2c(cc(C)c(c3c(C)cc4c(cc(O)c(O)c4C(NC[C@@H](c5ccccc5)C)=O)c3O)c2O)c(C(NC[C@@H](c6ccccc6)C)=O)c1O</chem>             | C42H40N2O8      | 700.776 | Sabutoclox                      |
| Chemicals | S8061 |                                                                                                                                 |                 |         |                                 |
| Selleck   |       |                                                                                                                                 |                 |         |                                 |
| Chemicals | S7494 | <chem>c1(C)cc(C)c(c2nc(NC(=O)c3ccccc3)sc2)c(C)c1</chem>                                                                         | C19H18N2OS      | 322.424 | INH6                            |
| Selleck   |       |                                                                                                                                 |                 |         |                                 |
| Chemicals | S7513 | <chem>CN1C(=O)N(Cc2cc(F)ccc2C#N)C(N3CC(N)CCC3)=CC1=O</chem>                                                                     | C18H20FN5O2     | 357.382 | Trelagliptin                    |
| Selleck   |       |                                                                                                                                 |                 |         |                                 |
| Chemicals | S7526 | <chem>C(NCCO)(=O)c1cccc(c2cc(Nc3ccc(OC(F)(F)F)cc3)ncn2)c1</chem>                                                                | C20H17F3N4O3    | 418.369 | GNF-5                           |
| Selleck   |       |                                                                                                                                 |                 |         |                                 |
| Chemicals | S7587 | <chem>c1(NC(c2nnc2N)=NO)cc(Cl)c(F)cc1</chem>                                                                                    | C9H7ClFN5O2     | 271.636 | INCB024360                      |
| Selleck   |       |                                                                                                                                 |                 |         |                                 |
| Chemicals | S8002 | <chem>c1c(C(O)=O)c2c(n(Cc3c(C)c(C(F)F)cc3)c(C)n2)cc1N4CCOCC4</chem>                                                             | C22H22F3N3O3    | 433.424 | GSK2636771                      |
| Selleck   |       |                                                                                                                                 |                 |         |                                 |
| Chemicals | S8014 | <chem>C(O)(CCc1ccc(NCc2cccc(Oc3ccccc3)c2)cc1)=O</chem>                                                                          | C22H21NO3       | 347.407 | GW9508                          |
| Selleck   |       |                                                                                                                                 |                 |         |                                 |
| Chemicals | S8024 | <chem>n1c(c2ncc1c3ccccc3)cc(OC)c(OC)c2</chem>                                                                                   | C16H14N2O2      | 266.295 | Tyrphostin AG 1296              |
| Selleck   |       | <chem>c(scc1)(c(Nc2n[nH]c3c2CN(C(N[C@@H](c4ccccc4)CN(C)C)=O)C3(C)C)nc(C)n5)c15</chem>                                           | C25H30N8OS      | 490.624 | PF-3758309                      |
| Chemicals | S7094 |                                                                                                                                 |                 |         |                                 |
| Selleck   |       | <chem>c1cc2c(nc(CCc3ccc(OC)c(Cl)c3)n2C[C@@H](N4CCOCC4)C)cc1c5c(C)onc5</chem>                                                    | C28H33ClN4O3    | 509.04  | SGC-CBP30                       |
| Chemicals | S7256 | <chem>C</chem>                                                                                                                  |                 |         |                                 |
| Selleck   |       | <chem>CC(n1nc(c2c(F)c(NS(C)(=O)=O)cc(Cl)c2)c3ccnc(NCC(NC(OC)=O)C)n3)c1)C</chem>                                                 | C22H27ClFN7O4S  | 540.011 | LGX818                          |
| Chemicals | S7108 |                                                                                                                                 |                 |         |                                 |
| Selleck   |       |                                                                                                                                 |                 |         |                                 |
| Chemicals | S7270 | <chem>c1c(C(F)F)F)cc(NC(=O)c2ccncc2)c(N3CCCC3)c1</chem>                                                                         | C18H18F3N3O     | 349.35  | SRPIN340                        |
| Selleck   |       |                                                                                                                                 |                 |         |                                 |
| Chemicals | S7124 | <chem>c1n2c(c(NNC(c3nccnc3)=O)nc4c2ccc(F)c4)cc1</chem>                                                                          | C16H11FN6O      | 322.297 | SC144                           |
| Selleck   |       |                                                                                                                                 |                 |         |                                 |
| Chemicals | S7285 | <chem>c1c(n2c(COc3cc(C)c(c4ccc(S(C)(=O)=O)cc4)cc3)nnc2SC5CCCC5)cncc1</chem>                                                     | C27H28N4O3S2    | 520.666 | NMS-873                         |
| Selleck   |       |                                                                                                                                 |                 |         |                                 |
| Chemicals | S7134 | <chem>c1cc(n2c(C)cc(C(=O)CN3CCCC3)c2)ccc1F</chem>                                                                               | C18H21FN2O      | 300.371 | IU1                             |
| Selleck   |       |                                                                                                                                 |                 |         |                                 |
| Chemicals | S7301 | <chem>C(CCS1)(N=C(SCC(=O)Nc2ccc(c3ccccc3)cn2)N(c4ccccc4)C5=O)=C15</chem>                                                        | C25H20N4O2S2    | 472.582 | IWP-L6                          |
| Selleck   |       |                                                                                                                                 |                 |         |                                 |
| Chemicals | S7145 | <chem>c1cc2c(c(c3ncc(CN4CCOCC4)cc3)c(O)[nH]2)cc1C#N</chem>                                                                      | C19H18N4O2      | 334.372 | AZD1080                         |
| Selleck   |       |                                                                                                                                 |                 |         |                                 |
| Chemicals | S7320 | <chem>c1(cc(OC)cc2)c2SC(=CC(=O)C)N1CC</chem>                                                                                    | C13H15NO2S      | 249.329 | TG003                           |
| Selleck   |       |                                                                                                                                 |                 |         | Ilomastat (GM6001,              |
| Chemicals | S7157 | <chem>c1cc2c([nH]cc2C[C@H](NC([C@H](CC(C)C)CC(NO)=O)=O)C(NC)=O)cc1</chem>                                                       | C20H28N4O4      | 388.461 | Galaridin)                      |
| Selleck   |       |                                                                                                                                 |                 |         |                                 |
| Chemicals | S7333 | <chem>c1cc(OC(C)=O)N2CCC(NC(=O)CCCS)CC2c(Cl)cc1Cl</chem>                                                                        | C17H22Cl2N2O3S  | 405.339 | K-Ras(G12C) inhibitor 6         |
| Selleck   |       |                                                                                                                                 |                 |         |                                 |
| Chemicals | S7177 | <chem>c1cc(S(=O)(=O)Cc2cc(C)cc(OCc3ccc(CN4CCC[C@@H]4CO)cc3)c2)ccc1</chem>                                                       | C27H31NO4S      | 465.604 | PF-543                          |
| Selleck   |       |                                                                                                                                 |                 |         |                                 |
| Chemicals | S7356 | <chem>c1c(NS(c2ccccc2)(=O)=O)cc(c3ccc4n(C(C(OC)=O)cn4)c3)cn1</chem>                                                             | C21H18N4O4S     | 422.457 | HS-173                          |
| Selleck   |       |                                                                                                                                 |                 |         |                                 |
| Chemicals | S7199 | <chem>c1cc2c(c(NCc3ccccc3)nc(NCc4ccccc4)n2)cc1</chem>                                                                           | C22H20N4        | 340.421 | DBeQ                            |
| Selleck   |       |                                                                                                                                 |                 |         |                                 |
| Chemicals | S7369 | <chem>C1SC(NN=C(C(O)=O)Cc2c(N(O)O)cccc2)=NC1c3ccc(Cl)c(Cl)c3</chem>                                                             | C18H16Cl2N4O4S  | 455.315 | 4EGI-1                          |
| Selleck   |       |                                                                                                                                 |                 |         |                                 |
| Chemicals | S7217 | <chem>c1cc(C(=O)Nc2ncc3c(cc[nH]3)c2)ccc1</chem>                                                                                 | C14H11N3O       | 237.257 | OAC1                            |

|           |       |                                                                                                                                         |                 |         |  |  |                        |
|-----------|-------|-----------------------------------------------------------------------------------------------------------------------------------------|-----------------|---------|--|--|------------------------|
| Selleck   |       |                                                                                                                                         |                 |         |  |  | (-)-p-Bromotetramisole |
| Chemicals | S7383 | <chem>OC(=O)C(=O)O.C1SC(=N2)N(C[C@@H]2c3ccc(Br)cc3)C1</chem>                                                                            | C13H13BrN2O4S   | 373.222 |  |  | Oxalate                |
| Selleck   |       |                                                                                                                                         |                 |         |  |  |                        |
| Chemicals | S7241 | <chem>C1C(NS(c2ccc(c3ccsc3)c(NC(Nc4cc(C(F)(F)F)ccc4)=O)c2)(=O)=O)C1</chem>                                                              | C21H18F3N3O3S2  | 481.511 |  |  | AGI-6780               |
| Selleck   |       | <chem>c1(ccnc2c2cccc1S(=O)(=O)N(C)[C@@H](Cc3ccc(OS(=O)(=O)c4cccc5c4ccnc5)cc3)C(=O)N6CCN(c7ccccc7)CC6</chem>                             | C38H35N5O6S2    | 721.844 |  |  | KN-62                  |
| Chemicals | S7422 |                                                                                                                                         |                 |         |  |  |                        |
| Selleck   |       |                                                                                                                                         |                 |         |  |  |                        |
| Chemicals | S7437 | <chem>c1ccc(C=CC(NC(NC(Nc2ccc(Cl)cc2)=S)C(Cl)(Cl)Cl)=O)cc1</chem>                                                                       | C18H15Cl4N3OS   | 463.208 |  |  | Sal003                 |
| Selleck   |       |                                                                                                                                         |                 |         |  |  |                        |
| Chemicals | S8037 | <chem>c1cc2c([nH]cc2CC3C(=O)N(C)C(=S)N3)cc1</chem>                                                                                      | C13H13N3OS      | 259.327 |  |  | Necrostatin-1          |
| Selleck   |       |                                                                                                                                         |                 |         |  |  |                        |
| Chemicals | S7452 | <chem>c1cc(OC)c(NC(=S)Nc2cn(CC)nc2C(=O)N)cc1Cl</chem>                                                                                   | C14H16ClN5O2S   | 353.827 |  |  | FPH2 (BRD-9424)        |
| Selleck   |       | <chem>c1cc(C2=C(C)N3CCN(c4ccc(C(NS(=O)(=O)c5cc([N+][[O-]])=O)c(NCC6CCOCC6)cc5)=O)c(Oc7cc8c([nH]cc8)nc7)c4)CC3)CCC(C)(C)C2)ccc1Cl</chem> | C45H50ClN7O7S   | 868.439 |  |  | ABT-199 (GDC-0199)     |
| Chemicals | S8048 |                                                                                                                                         |                 |         |  |  |                        |
| Selleck   |       |                                                                                                                                         |                 |         |  |  |                        |
| Chemicals | S7473 | <chem>CCCCN(C(Nc1ccccc1)=O)Cc2ccc(C(NO)=O)cc2</chem>                                                                                    | C19H23N3O3      | 341.404 |  |  | Nexturastat A          |
| Selleck   |       | <chem>N1(C(=O)N2CCNC(=O)C2)[C@H](c3ccc(Cl)cc3)[C@@H](c4ccc(Cl)cc4)N=C1c5c(OC(C)C)cc(OC)cc5</chem>                                       | C30H30Cl2N4O4   | 581.49  |  |  | Nutlin-3b              |
| Chemicals | S8065 |                                                                                                                                         |                 |         |  |  |                        |
| Selleck   |       |                                                                                                                                         |                 |         |  |  |                        |
| Chemicals | S7497 | <chem>Cc1[nH]c(c2c1CCNC(c3scccc3)=O)cccc2</chem>                                                                                        | C16H16N2OS      | 284.376 |  |  | CK-636                 |
| Selleck   |       |                                                                                                                                         |                 |         |  |  |                        |
| Chemicals | S7515 | <chem>C1C(c2ccccc2)=NOC1CC(O)=O</chem>                                                                                                  | C11H11NO3       | 205.21  |  |  | VGX-1027               |
| Selleck   |       |                                                                                                                                         |                 |         |  |  |                        |
| Chemicals | S7528 | <chem>c1(C(F)(F)F)c(NCC)nc(Nc2c(OC)cc(C(=O)N3CCOCC3)c(F)c2)nc1</chem>                                                                   | C19H21F4N5O3    | 443.395 |  |  | GNE-7915               |
| Selleck   |       |                                                                                                                                         |                 |         |  |  |                        |
| Chemicals | S7589 | <chem>c1c(n2c(c3ccc(n4ccnc4)cc3)ccc2CCC(=O)O)c(C)cc(C(=O)N)c1</chem>                                                                    | C24H22N4O3      | 414.456 |  |  | N6022                  |
| Selleck   |       |                                                                                                                                         |                 |         |  |  |                        |
| Chemicals | S8003 | <chem>N(c1cc(Cl)ccc1OC)C(Nc2c(c3nc(C)c2)cccc3)=O</chem>                                                                                 | C18H16ClN3O2    | 341.792 |  |  | PQ 401                 |
| Selleck   |       | <chem>N(c1cccc(Oc2c(c3ncn2)cc(OC)c(OC)c3)c1)C(Nc4cc(C(C)(C)C(F)(F)F)on4)=O</chem>                                                       | C24H22F3N5O5    | 517.457 |  |  | CEP-32496              |
| Chemicals | S8015 |                                                                                                                                         |                 |         |  |  |                        |
| Selleck   |       |                                                                                                                                         |                 |         |  |  |                        |
| Chemicals | S8025 | <chem>c1c(C(F)(F)F)ccc(S(=O)(CCNC(=O)c2ccc(Cl)cc2)=O)n1</chem>                                                                          | C15H12ClF3N2O3S | 392.781 |  |  | GSK3787                |
| Selleck   |       |                                                                                                                                         |                 |         |  |  |                        |
| Chemicals | S7096 | <chem>c1(CCC(Nc2nc3c(cc(Cl)cc3)s2)=O)ccc(OC)c(O)C)c1</chem>                                                                             | C18H17ClN2O3S   | 376.857 |  |  | KY02111                |
| Selleck   |       |                                                                                                                                         |                 |         |  |  |                        |
| Chemicals | S7257 | <chem>c1ccc(NC(=O)C=C)cc1Nc2nc(Nc3ccc(Oc4cc(C(=O)N)C)ccc4)cc3)nc2F</chem>                                                               | C26H22FN7O3     | 499.496 |  |  | CNX-774                |
| Selleck   |       | <chem>n1nc2n(c3c(c(C)c(C)s3)C4ccc(Cl)cc4)=N[C@@H]2CC(=O)OC(C)(C)C)c1C</chem>                                                            | C23H25ClN4O2S   | 456.988 |  |  | (+)-JQ1                |
| Chemicals | S7110 |                                                                                                                                         |                 |         |  |  |                        |
| Selleck   |       |                                                                                                                                         |                 |         |  |  |                        |
| Chemicals | S7272 | <chem>c1(O)c(C=O)c2c(C(C)=CC(=O)O2)cc1</chem>                                                                                           | C11H8O4         | 204.179 |  |  | 478C                   |
| Selleck   |       |                                                                                                                                         |                 |         |  |  |                        |
| Chemicals | S7125 | <chem>c1(C(F)(F)F)cc(c2nn(C=CC(OC(C)C)=O)cn2)cc(OC)c1</chem>                                                                            | C16H16F3N3O3    | 355.312 |  |  | KPT-185                |
| Selleck   |       |                                                                                                                                         |                 |         |  |  |                        |
| Chemicals | S7289 | <chem>c1cc(C(=O)C=Cc2nc3c(ccccc3)cc2)ccn1</chem>                                                                                        | C17H12N2O       | 260.29  |  |  | PFK15                  |
| Selleck   |       |                                                                                                                                         |                 |         |  |  |                        |
| Chemicals | S7135 | <chem>c1(Cl)cc2c(N(Cc3c(Cl)ccc(Cl)c3)C(=O)C2=NOC(C)=O)cc1</chem>                                                                        | C17H11Cl3N2O3   | 397.64  |  |  | LDN-57444              |
| Selleck   |       |                                                                                                                                         |                 |         |  |  |                        |
| Chemicals | S7303 | <chem>n1c(Nc2c(C)cc(C=CC#N)cc2C)ccnc1Nc3ccc(C#N)cc3</chem>                                                                              | C22H18N6        | 366.419 |  |  | Rilpivirine            |
| Selleck   |       |                                                                                                                                         |                 |         |  |  |                        |
| Chemicals | S7146 | <chem>CC(OCc1ccc(c2cnc3n(ncc3c4c(c5ncc4)ccccc5)c2)cc1)C</chem>                                                                          | C24H20N4O       | 380.442 |  |  | DMH1                   |
| Selleck   |       |                                                                                                                                         |                 |         |  |  |                        |
| Chemicals | S7324 | <chem>c1(c2nc(C(F)(F)F)on2)cc(C(=O)NCC3(c4sc(c5ccccc5)n4)CCOCC3)ccc1</chem>                                                             | C25H21F3N4O3S   | 514.519 |  |  | TMP269                 |
| Selleck   |       | <chem>c1(CN2CCN(CC)CC2)cn(C(Nc3ncc(F)c(c4cc5c(nc(C)n5C(C)C)c(F)c4)n3)cc1.CS(O)(=O)=O</chem>                                             | C28H36F2N8O3S   | 602.699 |  |  | LY2835219              |
| Chemicals | S7158 |                                                                                                                                         |                 |         |  |  |                        |
| Selleck   |       |                                                                                                                                         |                 |         |  |  |                        |
| Chemicals | S7336 | <chem>c1(l)cc(C(O)=O)c(NC(=O)[C@@H](NCc2ccccc2)Cc3ccccc3)cc1</chem>                                                                     | C23H21N2O3      | 500.329 |  |  | CW069                  |
| Selleck   |       |                                                                                                                                         |                 |         |  |  |                        |
| Chemicals | S7185 | <chem>C1CCC(NC(=O)C(C2ccccc2C)N(c3ccccc(F)c3)C(=O)Cn4c(C)ccc4)CC1</chem>                                                                | C27H31FN4O2     | 462.559 |  |  | AGI-5198               |
| Selleck   |       | <chem>c1ccc(CNc2nc(Nc3cc(CC(=O)N4)c4cc3)ccc2C(F)(F)F)c(N(S(C)(=O)=O)C)n1.Cl</chem>                                                      | C21H21ClF3N7O3S | 543.95  |  |  | PF-562271 HCl          |
| Chemicals | S7357 |                                                                                                                                         |                 |         |  |  |                        |
| Selleck   |       | <chem>c1(C(F)(F)F)c(Nc2cc(NC(=O)C=C)ccc2)nc(Nc3ccc(NC4CN(CCF)C4)cc3OC)nc1</chem>                                                        | C26H27F4N7O2    | 545.532 |  |  | CNX-2006               |
| Chemicals | S7206 |                                                                                                                                         |                 |         |  |  |                        |
| Selleck   |       | <chem>c1ccc(C(N(c2ccc(C(O)=O)cc2)C(=O)C3=Cc4cc(c5ccc([N+][[O-]])=O)cc5)cc4)=C3)cc1</chem>                                               | C28H18N2O6      | 478.452 |  |  | 4E1RCat                |
| Chemicals | S7370 |                                                                                                                                         |                 |         |  |  |                        |
| Selleck   |       | <chem>C(N(c1cc(C(F)(F)F)ccc1)C(=O)C(C(=O)Nc2ccc(S(=O)(=O)C)cn2)=C3)=C3c4n(C)ccc4</chem>                                                 | C24H20F3N5O4S   | 531.507 |  |  | Alvelestat (AZD9668)   |
| Chemicals | S7218 |                                                                                                                                         |                 |         |  |  |                        |



|           |       |                                                                                                                                    |                  |         |                         |
|-----------|-------|------------------------------------------------------------------------------------------------------------------------------------|------------------|---------|-------------------------|
| Selleck   |       |                                                                                                                                    |                  |         |                         |
| Chemicals | S7391 | [C@@H](NC(=O)OCc1ccccc1)(C(=O)NC(C)C(=O)CF)Cc2ccccc2                                                                               | C21H23FN2O4      | 386.417 | Z-FA-FMK                |
| Selleck   |       |                                                                                                                                    |                  |         |                         |
| Chemicals | S7242 | c1c2c(C(=O)N(c3ccccc3OCC)C(C)(N4CCN(C(=O)COc5ccc(Cl)cc5)CC4)C)=N2)ccc1                                                             | C30H31ClN4O4     | 547.045 | Erastin                 |
| Selleck   |       |                                                                                                                                    |                  |         |                         |
| Chemicals | S7423 | c1(ccccc1CN(C)C)C=Cc2ccc(Cl)cc2N(CCO)S(=O)(=O)c3ccc(OC)cc3.P(O)(O)(=O)=O.[H]                                                       | C26H32ClN2O8PS   | 599.033 | KN-93 Phosphate         |
| Selleck   |       |                                                                                                                                    |                  |         |                         |
| Chemicals | S7438 | CC(NC(CCC(Nc(c1C2=O)cccc1)=N2)=O)c3ccccc3                                                                                          | C19H19N3O2       | 321.373 | ME0328                  |
| Selleck   |       |                                                                                                                                    |                  |         |                         |
| Chemicals | S8038 | c1cc2c(C=CNC2=O)c(OCC(=O)c3ccccc3)c1                                                                                               | C17H13NO3        | 279.29  | UPF 1069                |
| Selleck   |       |                                                                                                                                    |                  |         |                         |
| Chemicals | S7458 | CCNC(C)(NNC1=C2C(=O)C=C(O)C(CI)=C2)C1c3ccc(OC)cc3=O                                                                                | C19H18ClN3O4     | 387.817 | VER-49009               |
| Selleck   |       |                                                                                                                                    |                  |         |                         |
| Chemicals | S8050 | c1c2c(c3c(CO C(=O)N3c4ccc(C(C)(C)C#N)cc4)cn2)cc(c5cc6c(cccc6)nc5)c1O1C=C(OCCCCCSc2c3c(cc(C(F)(F)F)cc3)nc2)C(=O)C=C1CN4CCOCC4.Cl.Cl | C30H22N4O2       | 470.521 | ETP-46464               |
| Selleck   |       |                                                                                                                                    |                  |         |                         |
| Chemicals | S7482 |                                                                                                                                    | C25H29Cl2F3N2O4S | 581.475 | EHT 1864                |
| Selleck   |       |                                                                                                                                    |                  |         |                         |
| Chemicals | S8072 | c1cc(C(=O)NC(C)CCC)cc(Cl)c1Cl                                                                                                      | C12H15Cl2NO      | 260.16  | NSC 405020              |
| Selleck   |       |                                                                                                                                    |                  |         |                         |
| Chemicals | S7499 | c1c(NN=C(C#N)C(=O)c2noc(C(C)(C)C)c2)cccc1Cl                                                                                        | C16H15ClN4O2     | 330.769 | ESI-09                  |
| Selleck   |       |                                                                                                                                    |                  |         |                         |
| Chemicals | S7516 | Cc1n(c2ccc(Cl)cc2)nc1C(Nc3ccc(N4CCC(N5CCOCC5)CC4)c(C#N)c3)=O                                                                       | C27H29ClN6O2     | 505.011 | Y-320                   |
| Selleck   |       |                                                                                                                                    |                  |         |                         |
| Chemicals | S7529 | c1(c2ncc(C)c(NCc3ccc(n4ccnn4)cc3)n2)cccc1C(C)C                                                                                     | C23H24N6         | 384.477 | ML323                   |
| Selleck   |       |                                                                                                                                    |                  |         | Santacruzamate A        |
| Chemicals | S7595 | c1ccccc1CCNC(=O)CCNC(=O)OCC                                                                                                        | C15H22N2O3       | 278.347 | (CAY10683)              |
| Selleck   |       |                                                                                                                                    |                  |         |                         |
| Chemicals | S8004 | C(c1ccc(c2c1)cccc2)(=O)CCN(Cc3ccccc3)C(C)C.Cl                                                                                      | C23H26ClNO       | 367.912 | ZM 39923 HCl            |
| Selleck   |       |                                                                                                                                    |                  |         |                         |
| Chemicals | S8016 | N(C)Cc1cc(c2ccccc2F)n(S(c3ccccc3)(=O)=O)c1.C(O)(=O)C=CC(O)=O                                                                       | C21H20FN3O6S     | 461.463 | TAK-438                 |
| Selleck   |       |                                                                                                                                    |                  |         |                         |
| Chemicals | S8028 | c1cc2c(ncc(C(=O)Nc3cc(O)C(O)C)cc3C(=O)Nc4ccc(CCN5CCc6c(cc(O)C)c(O)C)c6)C5)cc4)c2)cc1                                               | C38H38N4O6       | 646.732 | Tariquidar              |
| Selleck   |       |                                                                                                                                    |                  |         |                         |
| Chemicals | S7097 | n1c(c2cc(F)ccc2[C@H]3Cc4c(C(C)nc(N)n4)C(=O)N3)cccc1OC                                                                              | C20H18FN5O2      | 379.388 | HSP990 (NVP-HSP990)     |
| Selleck   |       |                                                                                                                                    |                  |         |                         |
| Chemicals | S7258 | Cc1sc(Sc2c(c3ncn2)cc(O)C(O)C)c3nn1                                                                                                 | C13H12N4O2S2     | 320.39  | SKLB1002                |
| Selleck   |       |                                                                                                                                    |                  |         |                         |
| Chemicals | S7111 | c1ccc2c(c3n(cnc3)C2CC(O)C4CCCCC4)c1                                                                                                | C18H22N2O        | 282.38  | NLG919                  |
| Selleck   |       |                                                                                                                                    |                  |         |                         |
| Chemicals | S7273 | n1c(N2CCC(c3nc(C(=O)Nc4[nH]c5c(ccc(C(=O)c6ccccc6)c5)n4)cs3)CC2)c7c(ccs7)nc1                                                        | C29H23N7O2S2     | 565.669 | SC75741                 |
| Selleck   |       |                                                                                                                                    |                  |         |                         |
| Chemicals | S7127 | c1cc(CN2CC3=C(N(Cc4ccccc4C)C(=N5)N(CC5)C3=O)CC2)ccc1                                                                               | C24H26N4O        | 386.489 | TIC10                   |
| Selleck   |       |                                                                                                                                    |                  |         |                         |
| Chemicals | S7291 | c(nc(NC(=O)C1CC1)s2)(ccc(Oc3ccc(F)c(NC(=O)Cc4cc(C(F)(F)F)ccc4)c3)c5C#N)c25                                                         | C27H18F4N4O3S    | 554.515 | TAK-632                 |
| Selleck   |       |                                                                                                                                    |                  |         |                         |
| Chemicals | S7136 | c1cc(NC(=S)NC(NC(=O)C(c2ccccc2)c3ccccc3)C(Cl)(Cl)Cl)cc([N+])([O-])=O)c1F                                                           | C23H18Cl3FN4O3S  | 555.836 | CGK 733                 |
| Selleck   |       |                                                                                                                                    |                  |         |                         |
| Chemicals | S7304 | c1(C)sc2c(C(c3ccc(Cl)cc3)=N[C@@H](CC(N)=O)c4n2c(C)nn4)c1C                                                                          | C19H18ClN5OS     | 399.897 | CPI-203                 |
| Selleck   |       |                                                                                                                                    |                  |         |                         |
| Chemicals | S7147 | C1NCCN(c2ccc(c3cnc4n(ncc4c5ccccc56)nc6)c3)cc2)C1                                                                                   | C25H22N6         | 406.482 | LDN-212854              |
| Selleck   |       |                                                                                                                                    |                  |         |                         |
| Chemicals | S7325 | n1c(N[C@H]2CC[C@H](O)CC2)c(C(=O)NCc3ccc(n4ccnc4)cc3)cnc1NCCCC                                                                      | C25H33N7O2       | 463.575 | UNC2881                 |
| Selleck   |       |                                                                                                                                    |                  |         |                         |
| Chemicals | S7162 | N(c(c1C(=O)N2c3cc(O)C(Cl)cc3Cl)cccc1)=C2S                                                                                          | C15H10Cl2N2O2S   | 353.223 | Mdivi-1                 |
| Selleck   |       |                                                                                                                                    |                  |         |                         |
| Chemicals | S7337 | C1CC(c2ccc(CN(c3ccc(C(=O)O)cc3)C(CN(C)S(=O)(=O)c4c(F)c(F)c(F)c(F)c4F)=O)cc2)CCC1                                                   | C29H27F5N2O5S    | 610.592 | SH-4-54                 |
| Selleck   |       |                                                                                                                                    |                  |         |                         |
| Chemicals | S7189 | n(c(C)nn1)(c2c(cc(O)C)cc2)C(c3ccc(Cl)cc3)=N[C@H]4CC(=O)NCC)c14                                                                     | C22H22ClN5O2     | 423.895 | I-BET-762               |
| Selleck   |       |                                                                                                                                    |                  |         |                         |
| Chemicals | S7359 | n1c(N)c(c2cc(O)C)c(O)C(O)C2cc(c3cc(O)ccc3)c1                                                                                       | C20H20N2O4       | 352.384 | K02288                  |
| Selleck   |       |                                                                                                                                    |                  |         |                         |
| Chemicals | S7207 | c1cccc2c1n(CCCSC(N)=N)cc2C3=C(c4c(c5n(C4)cccc5)C(=O)NC3=O.CS(O)(=O)=O                                                              | C26H27N5O5S2     | 553.653 | Ro 31-8220 Mesylate     |
| Selleck   |       |                                                                                                                                    |                  |         |                         |
| Chemicals | S7372 | Cc1nc(n2c1c3nc(Nc4c(Br)cc(OC)cc4Br)sc3)nc2                                                                                         | C17H13Br2N5OS    | 495.191 | PTC-209                 |
| Selleck   |       |                                                                                                                                    |                  |         |                         |
| Chemicals | S7223 | n1c(c2ccc1c3c[nH]nc3c4nc(C)ccc4)ccn2                                                                                               | C17H13N5         | 287.319 | RepSox                  |
| Selleck   |       |                                                                                                                                    |                  |         |                         |
| Chemicals | S7392 | CC(CCN(C)C(NC(C1OC1C(O)=O)=O)CC(C)C)=O)C                                                                                           | C15H26N2O5       | 314.377 | Loxistatin Acid (E-64C) |

|           |       |                                                                                                                                                                                              |                 |          |                           |
|-----------|-------|----------------------------------------------------------------------------------------------------------------------------------------------------------------------------------------------|-----------------|----------|---------------------------|
| Selleck   |       |                                                                                                                                                                                              |                 |          |                           |
| Chemicals | S7243 | <chem>c1(NC2CCCC2)c(N)cc(C(=O)OCC)cc1</chem>                                                                                                                                                 | C15H22N2O2      | 262.347  | Ferrostatin-1 (Fer-1)     |
| Selleck   |       |                                                                                                                                                                                              |                 |          |                           |
| Chemicals | S7424 | <chem>c1cc2c(c(C=C(C(=O)O)S)c[nH]2)cc1F</chem>                                                                                                                                               | C11H8FNO2S      | 237.25   | PD 151746                 |
| Selleck   |       |                                                                                                                                                                                              |                 |          |                           |
| Chemicals | S7440 | <chem>CN(C(c1n(C2CCCC2)c(c3c1)nc(Nc4ccc(N5CCNCC5)cn4)nc3)=O)C</chem>                                                                                                                         | C23H30N8O       | 434.537  | LEE011                    |
| Selleck   |       |                                                                                                                                                                                              |                 |          |                           |
| Chemicals | S8039 | <chem>n1c(N)c2c(n(CCCNC(C)C)c(Sc3c(l)cc4c(OCCO4)c3)n2)nc1</chem>                                                                                                                             | C18H21N6O2S     | 512.368  | PU-H71                    |
| Selleck   |       |                                                                                                                                                                                              |                 |          |                           |
| Chemicals | S7459 | <chem>n1cc(c2c(C)cc(O)c(Cl)c2)c(c3ccc(OC)c3)c1C(=O)NCC</chem>                                                                                                                                | C19H17ClN2O5    | 388.802  | VER-50589                 |
| Selleck   |       |                                                                                                                                                                                              |                 |          |                           |
| Chemicals | S8051 | <chem>c1(Br)cnc(OCOc2ncnc(NS(=O)(NCCC)=O)c2c3ccc(Br)cc3)nc1</chem>                                                                                                                           | C19H20Br2N6O4S  | 588.273  | Macitentan                |
| Selleck   |       |                                                                                                                                                                                              |                 |          |                           |
| Chemicals | S7484 | <chem>c1c(Cl)cc(S(=O)(=O)Nc2ccc([N+](=O)[O-])=O)cc2C)c(Cl)c1</chem>                                                                                                                          | C13H10Cl2N2O4S  | 361.2    | FH535                     |
| Selleck   |       |                                                                                                                                                                                              |                 |          |                           |
| Chemicals | S8073 | <chem>c1ncc(n2c(C)cc(C=C3C(=O)NC(=S)S3)c2C)cc1</chem>                                                                                                                                        | C15H13N3OS2     | 315.413  | Optovin                   |
| Selleck   |       |                                                                                                                                                                                              |                 |          |                           |
| Chemicals | S7500 | <chem>c1c(C)cc(C)c(S(n2c(C)cc(C)c2)(=O)=O)c1C</chem>                                                                                                                                         | C15H19NO2S      | 277.382  | HJC0350                   |
| Selleck   |       |                                                                                                                                                                                              |                 |          |                           |
| Chemicals | S7517 | <chem>CC(O)(C(F)F)C(Nc1ccc(S(c2ccc(C(N(C)C)=O)cc2)(=O)=O)cc1Cl)=O</chem>                                                                                                                     | C19H18ClF3N2O5S | 478.87   | AZD7545                   |
| Selleck   |       | <chem>c1(ccccc1OCCOc2ccccc2N(CC(=O)O)COC(=O)C)CC(=O)OCCO(C(=O)C)N(C</chem>                                                                                                                   |                 |          |                           |
| Chemicals | S7534 | <chem>CC(=O)OCCO(C(=O)C)CC(=O)OCOC(=O)C</chem>                                                                                                                                               | C34H40N2O18     | 764.684  | BAPTA-AM                  |
|           |       | <chem>CN[C@@H](C)C(=O)N[C@@H](C1CCCC1)C(=O)N2CCC[C@H]2C(N[C@@H](C(c3ccccc3)c4ccccc4)C(=O)NCCCCCN(C([C@H](C5ccccc5)c6ccc6)NC(=O)[C@@H]7CCCN7C(=O)[C@H](C8CCCCC8)NC(=O)[C@H](C)NC)=O)=O</chem> |                 |          |                           |
| Selleck   |       |                                                                                                                                                                                              | C70H96N10O8     | 1205.573 | BV-6                      |
| Chemicals | S7597 |                                                                                                                                                                                              |                 |          |                           |
| Selleck   |       |                                                                                                                                                                                              |                 |          |                           |
| Chemicals | S8005 | <chem>S1C(=Cc2cccc(C(F)F)c2)C(=O)NC1=O</chem>                                                                                                                                                | C11H6F3NO2S     | 273.231  | SMI-4a                    |
| Selleck   |       |                                                                                                                                                                                              |                 |          |                           |
| Chemicals | S8019 | <chem>N1(c2ncnc3cc[nH]3)CCC(N)(C(N[C@H](c4ccc(Cl)cc4)CCO)=O)CC1</chem>                                                                                                                       | C21H25ClN6O2    | 428.915  | AZD5363                   |
| Selleck   |       |                                                                                                                                                                                              |                 |          |                           |
| Chemicals | S8029 | <chem>c1(cc(Cl)nc(SCC(=O)O)n1)Nc2ccc(C)c2C</chem>                                                                                                                                            | C14H14ClN3O2S   | 323.798  | WY-14643 (Pirinixic Acid) |
| Selleck   |       | <chem>N1(C(C(c2ccccc2)c3ccccc3)=O)Cc4c(n(C5ccc(N(C)C)c(C)c5)cn4)C[C@H]1C(=O)O</chem>                                                                                                         |                 |          |                           |
| Chemicals | S7098 |                                                                                                                                                                                              | C31H32N4O3      | 508.611  | PD123319                  |
| Selleck   |       |                                                                                                                                                                                              |                 |          |                           |
| Chemicals | S7261 | <chem>c1cc2c(C(=O)C(=O)C3=C2OC(C)C3)cc1</chem>                                                                                                                                               | C15H14O3        | 242.27   | Beta-Lapachone            |
| Selleck   |       |                                                                                                                                                                                              |                 |          |                           |
| Chemicals | S7113 | <chem>[C@@H]1(CO)[C@H](O)[C@H](O)[C@H](N2C=CC=NC2=O)O1</chem>                                                                                                                                | C9H12N2O5       | 228.202  | Zebularine                |
| Selleck   |       |                                                                                                                                                                                              |                 |          |                           |
| Chemicals | S7276 | <chem>n1c2c(cccc2)c(Nc3ccc(C(=O)Nc4ccc(Nc5cc(C)nc(N)n5)cc4)cc3)cc1</chem>                                                                                                                    | C27H23N7O       | 461.518  | SGI-1027                  |
| Selleck   |       | <chem>C1OCCC(N(c2cc(c3ccc(CN4CCOCC4)cc3)cc(C(=O)NCC5=C(C)C=C(C)NC5=O)c2C)CC)C1</chem>                                                                                                        |                 |          |                           |
| Chemicals | S7128 |                                                                                                                                                                                              | C34H44N4O4      | 572.738  | EPZ-6438                  |
| Selleck   |       |                                                                                                                                                                                              |                 |          |                           |
| Chemicals | S7292 | <chem>c1(C)ccc(C(NCCCCC(=O)Nc2c(N)cccc2)=O)cc1</chem>                                                                                                                                        | C20H25N3O2      | 339.431  | RG2833 (RGFP109)          |
| Selleck   |       |                                                                                                                                                                                              |                 |          |                           |
| Chemicals | S7138 | <chem>c1cc2c(c(c3ccccc3)nc(Nc4ccc(C(=O)Nc5cc(CNC)ccc5C)cc4)n2)cc1</chem>                                                                                                                     | C30H27N5O       | 473.568  | BMS-833923                |
| Selleck   |       |                                                                                                                                                                                              |                 |          |                           |
| Chemicals | S7307 | <chem>c1cc2c(CCN2C(Cc3cc(C(F)F)ccc3)=O)cc1c4cn(C)c5c4c(N)ncn5</chem>                                                                                                                         | C24H20F3N5O     | 451.444  | GSK2606414                |
| Selleck   |       |                                                                                                                                                                                              |                 |          |                           |
| Chemicals | S7148 | <chem>COc1ccc(c2cnc3n(ncc3c4cccc(c45)nccc5)c2)cc1</chem>                                                                                                                                     | C22H16N4O       | 352.389  | ML347                     |
| Selleck   |       |                                                                                                                                                                                              |                 |          |                           |
| Chemicals | S7326 | <chem>C(NS(=O)(c1ccc(Br)s1)=O)(=O)c2ccc(Cl)cc2Cl</chem>                                                                                                                                      | C11H6BrCl2NO3S2 | 415.11   | Tasisulam                 |
| Selleck   |       | <chem>c1cc(c2cc(C(NCC(C(=O)NC(C)=C3=C3CCC(=O)C4c(n(C(C)C)nc4)c2)enc1N5CCN(C(C)C)CC5</chem>                                                                                                   |                 |          |                           |
| Chemicals | S7165 |                                                                                                                                                                                              | C33H43N7O2      | 569.74   | UNC1999                   |
| Selleck   |       |                                                                                                                                                                                              |                 |          |                           |
| Chemicals | S7338 | <chem>c1cc2c(n(C)cc2c3ccnc(Nc4c(OC)cc(N5CCN(C)CC5)cc4)n3)cn1</chem>                                                                                                                          | C24H27N7O       | 429.517  | AZ191                     |
| Selleck   |       |                                                                                                                                                                                              |                 |          |                           |
| Chemicals | S7192 | <chem>n1c(N)c2c(OCCN(c3ccc([C@H]4CC[C@H](CC(=O)O)CC4)cc3)C2=O)nc1</chem>                                                                                                                     | C21H24N4O4      | 396.44   | PF-04620110               |
| Selleck   |       |                                                                                                                                                                                              |                 |          |                           |
| Chemicals | S7360 | <chem>Cc1c2c(n(c3C(Cc(Nc4ccc(O)cc4)=O)N=C2c5ccc(Cl)cc5)c(C)nn3)sc1C</chem>                                                                                                                   | C25H22ClN5O2S   | 491.992  | OTX015                    |
| Selleck   |       |                                                                                                                                                                                              |                 |          |                           |
| Chemicals | S7208 | <chem>c1cccc2c1n(CCCN(C)C)cc2C3=C(c4c(c5[nH]c4)cccc5)C(=O)NC3=O</chem>                                                                                                                       | C25H24N4O2      | 412.484  | GF109203X                 |
| Selleck   |       |                                                                                                                                                                                              |                 |          |                           |
| Chemicals | S7373 | <chem>C1CN(C2CCN(C(c3cncc(Br)c3)=O)CC2)CC1</chem>                                                                                                                                            | C15H20BrN3O     | 338.243  | UNC669                    |
| Selleck   |       | <chem>c1cc2c(n([C@H](COc3ccc(c4nc5c(cccc5)n4Cc6cccc6)cc3)C7CCNCC7)c(c8ccccc8)n2)cc1</chem>                                                                                                   |                 |          |                           |
| Chemicals | S7224 |                                                                                                                                                                                              | C40H37N5O       | 603.755  | Deltarasin                |
| Selleck   |       |                                                                                                                                                                                              |                 |          |                           |
| Chemicals | S7393 | <chem>CCOC(C1OC1C(NC(C(NCCC(C)C)=O)CC(C)C)=O)=O</chem>                                                                                                                                       | C17H30N2O5      | 342.43   | Aloxistatin               |

|           |       |                                                                                                                                                                                                                                       |                  |          |                                    |
|-----------|-------|---------------------------------------------------------------------------------------------------------------------------------------------------------------------------------------------------------------------------------------|------------------|----------|------------------------------------|
| Selleck   |       | <chem>c1(C(=O)NC2CCN(C)CC2)ccc(Nc3ncc4c(N(C5CCCC5)CC(F)(F)C(=O)N4C)n3)c(OC)c1</chem>                                                                                                                                                  | C27H35F2N7O3     | 543.609  | Ro3280                             |
| Chemicals | S7248 |                                                                                                                                                                                                                                       |                  |          |                                    |
| Selleck   |       | <chem>n1n(c2ccc(NC(CCl)=O)cc2)c(c3ccc(Cl)c(Cl)c3)nc1OCCOC</chem>                                                                                                                                                                      | C19H17Cl3N4O3    | 455.722  | MI-2 (MALT1 inhibitor)             |
| Chemicals | S7429 |                                                                                                                                                                                                                                       |                  |          |                                    |
| Selleck   |       | <chem>c1cc2c([nH]c(c3ccc(C(C)(C)C)cc3)n2)cc1N(CC)C(Nc1ccc(c2nc(N3CCOC[C@@H]3C)c4c(CN(C5COCC5)CC4)n2)cc1)=O</chem>                                                                                                                     | C17H18N2         | 250.338  | ZLN005                             |
| Chemicals | S7447 |                                                                                                                                                                                                                                       |                  |          |                                    |
| Selleck   |       | <chem>c1ccc(S(c2ccc([N+][O-])=O)c(OC(c3ccc(Cl)cc3)=O)c2)(=O)=O)cc1</chem>                                                                                                                                                             | C24H32N6O3       | 452.549  | GDC-0349                           |
| Chemicals | S8040 |                                                                                                                                                                                                                                       |                  |          |                                    |
| Selleck   |       | <chem>n1c(N)nc(OCc2scc(Br)c2)c3c1nc[nH]3</chem>                                                                                                                                                                                       | C19H12ClNO6S     | 417.82   | BTB06584                           |
| Chemicals | S7460 |                                                                                                                                                                                                                                       |                  |          |                                    |
| Selleck   |       | <chem>Cc1cc(N2CCOCC2)ccc1Nc3nc(NC4CCCC4)c5c(nc[nH]5)n3</chem>                                                                                                                                                                         | C10H8BrN5OS      | 326.172  | Lomeguatrib                        |
| Chemicals | S8056 |                                                                                                                                                                                                                                       |                  |          |                                    |
| Selleck   |       | <chem>c1nccc(C(NNc2ccccc2)=O)c1C1(=Cc2ccc(F)cc2)C(=O)C(=Cc3ccc(F)cc3)CN(CC4=CC(C)(C)N(O[H])C4(C)C)C1</chem>                                                                                                                           | C22H29N7O        | 407.512  | MPI-0479605                        |
| Chemicals | S7488 |                                                                                                                                                                                                                                       |                  |          |                                    |
| Selleck   |       | <chem>c(N(c1nccs1)C=C(C(O)=O)C2=O)(nc(N3C[C@@H](O[C][C@@H](NC)C3)cc4)c24</chem>                                                                                                                                                       | C12H11N3O        | 213.235  | PluriSIn #1 (NSC 14613)            |
| Chemicals | S8076 |                                                                                                                                                                                                                                       |                  |          |                                    |
| Selleck   |       | <chem>c1(OC)cc(Br)c(Nc2scc(c3c(C)nc4n3cccn4)n2)c(Br)c1.Br</chem>                                                                                                                                                                      | C28H30F2N2O2     | 464.547  | HO-3867                            |
| Chemicals | S7501 |                                                                                                                                                                                                                                       |                  |          |                                    |
| Selleck   |       | <chem>c1c(c2ccc(CN3CCS(=O)(=O)CC3)cc2)n4c(nc(NC(=O)C5CC5)n4)cc1n1c(c2c(NC3CCN(Cc4ccccc4)CC3)nc1N5CCCN(C)CC5)cc(OC)c(OC)c2.Cl.Cl</chem>                                                                                                | C18H19N5O4S      | 401.44   | Voreloxin (SNS-595)                |
| Chemicals | S7518 |                                                                                                                                                                                                                                       |                  |          |                                    |
| Selleck   |       | <chem>n1c(C)c(CSc2ccc(OC(CO)=O)c(C)c2)sc1c3ccc(C(F)(F)F)c(F)c3</chem>                                                                                                                                                                 | C17H14Br3N5OS    | 576.103  | PTC-209 HBr                        |
| Chemicals | S7539 |                                                                                                                                                                                                                                       |                  |          |                                    |
| Selleck   |       | <chem>n1c(c2c(N)cc1C)ccc(Nc3cc(C)nc(NC(C)CCCN(C)CC)cn3)c2.Cl.Cl.Cl</chem>                                                                                                                                                             | C21H23N5O3S      | 425.504  | Filgotinib (GLPG0634)              |
| Chemicals | S7605 |                                                                                                                                                                                                                                       |                  |          |                                    |
| Selleck   |       | <chem>c1([C@@H](O)C)C(=O)N2Cc3c([nH]nc3NC(c4ccc(N5CCN(C)CC5)cc4)=O)C2)ccccc1</chem>                                                                                                                                                   | C28H41Cl3N6O2    | 600.023  | BIX 01294                          |
| Chemicals | S8006 |                                                                                                                                                                                                                                       |                  |          |                                    |
| Selleck   |       | <chem>c1cc2c(NC(=O)C2=C(Nc3ccc(N(C(=O)CN4CCN(C)CC4)C)cc3)c5ccccc5)cc1C(=O)OC</chem>                                                                                                                                                   | C21H17F4NO3S2    | 471.488  | GW0742                             |
| Chemicals | S8020 |                                                                                                                                                                                                                                       |                  |          |                                    |
| Selleck   |       | <chem>c1cc(Nc2nc(N(C)c3cc4c(c(C)n(C)n4)cc3)ccn2)cc(S(=O)(=O)N)(N)=O)c1C.Cl</chem>                                                                                                                                                     | C24H38Cl3N7      | 530.964  | NSC 23766                          |
| Chemicals | S8031 |                                                                                                                                                                                                                                       |                  |          |                                    |
| Selleck   |       | <chem>c1(C(CCC(C)(C)C2)=C2CN3CCN(c4ccc(C(=O)NS(=O)(=O)c5ccc(N[C@@H](CS66cccc6)CCN7CCOCC7)c(S(=O)(=O)C(F)(F)F)c5)cc4)CC3)ccc(Cl)c</chem>                                                                                               | C47H55ClF3N5O6S3 | 974.613  | ABT-263 (Navitoclax)               |
| Chemicals | S1001 |                                                                                                                                                                                                                                       |                  |          |                                    |
| Selleck   |       | <chem>c1ccccc1</chem>                                                                                                                                                                                                                 | C26H30N6O3       | 474.555  | Danuserib (PHA-739358)             |
| Chemicals | S1107 |                                                                                                                                                                                                                                       |                  |          |                                    |
| Selleck   |       | <chem>c1cc2c(NC(=O)C2=C(Nc3ccc(N(C(=O)CN4CCN(C)CC4)C)cc3)c5ccccc5)cc1C(=O)OC</chem>                                                                                                                                                   | C31H33N5O4       | 539.625  | Nintedanib (BIBF 1120)             |
| Chemicals | S1010 |                                                                                                                                                                                                                                       |                  |          |                                    |
| Selleck   |       | <chem>n1cc2c(N(C3CCCC3)C(=O)C(C(=O)C)=C2C)nc1Nc4ccc(N5CCNCC5)cn4.Cl</chem>                                                                                                                                                            | C24H30ClN7O2     | 483.994  | Palbociclib (PD-0332991)           |
| Chemicals | S1116 |                                                                                                                                                                                                                                       |                  |          |                                    |
| Selleck   |       | <chem>c1(OC)cc2c(c(Nc3cc(Cl)c(F)cc3)ncn2)cc1OCCCN4CCOCC4</chem>                                                                                                                                                                       | C22H24ClF4N4O3   | 446.902  | Gefitinib (ZD1839)                 |
| Chemicals | S1025 |                                                                                                                                                                                                                                       |                  |          |                                    |
| Selleck   |       | <chem>c1cc2c(C(=O)C3=C([N](Cc4cncn4)=C(C)N3CCOC)C2=O)cc1.[Br-]</chem>                                                                                                                                                                 | C20H19BrN4O3     | 443.294  | YM155 (Sepantronium Bromide)       |
| Chemicals | S1130 |                                                                                                                                                                                                                                       |                  |          |                                    |
| Selleck   |       | <chem>c1cc(Nc2nc(N(C)c3cc4c(c(C)n(C)n4)cc3)ccn2)cc(S(=O)(=O)N)(N)=O)c1C.Cl</chem>                                                                                                                                                     | C21H24ClN7O2S    | 473.979  | Pazopanib HCl                      |
| Chemicals | S1035 |                                                                                                                                                                                                                                       |                  |          |                                    |
| Selleck   |       | <chem>C=C(C)[C@H](O)C(N)=O)[C@@H](O)C=C(C)C(=O)N2(C(=O)C2=C(C)[C@H]1(O)C)[C@@H](O)C(CO)CO)CC[C@@H](C)[C@@H]2O)C(=O)[C@@]3([H])N(CCC3C)C(=O)C(=O)[C@](O)(O)[C@@]4([H])C(C)[C@H](O)C(C)=CC=CC=C[C@@H](C)C[C@@H](C)C(=O)[C@H](O)C</chem> | C32H49ClN4O8     | 653.206  | 17-DMAG (Alvespimycin)             |
| Chemicals | S1142 |                                                                                                                                                                                                                                       |                  |          |                                    |
| Selleck   |       | <chem>[C@H](O)C(C)=C[C@@H](C)C(=O)C2[C@H](C)CC4C1</chem>                                                                                                                                                                              | C56H87NO16       | 1030.287 | Temsirolimus (CCI-779, NSC 683864) |
| Chemicals | S1044 |                                                                                                                                                                                                                                       |                  |          |                                    |
| Selleck   |       | <chem>c(scc1)(c(NCCc2nc(NC(=O)Nc3cccc(Cl)c3)s2)ncn4)c14.CS(O)(=O)=O</chem>                                                                                                                                                            | C19H19ClN6O4S3   | 527.04   | SNS-314 Mesylate                   |
| Chemicals | S1154 |                                                                                                                                                                                                                                       |                  |          |                                    |
| Selleck   |       | <chem>c1cc2c(n(C3CCN(Cc4ccccc4)CC3)cc2C5=C(c6cn(C)c7c6cccc7)C(=O)NC5=O)cc1</chem>                                                                                                                                                     | C32H29N5O2       | 515.605  | Enzastaurin (LY317615)             |
| Chemicals | S1055 |                                                                                                                                                                                                                                       |                  |          |                                    |
| Selleck   |       | <chem>c1(C(=O)N)cc2c(nccc2O)c3ccc(NC(NC4CC4)=O)c(Cl)c3)cc1OC</chem>                                                                                                                                                                   | C21H19ClN4O4     | 426.853  | Lenvatinib (E7080)                 |
| Chemicals | S1164 |                                                                                                                                                                                                                                       |                  |          |                                    |
| Selleck   |       | <chem>c1(c2cnn(C3CCNCC3)c2)cn(C)nc(O[C@H](C)c4c(Cl)c(F)ccc4Cl)c1</chem>                                                                                                                                                               | C21H22Cl2FN5O    | 450.337  | Crizotinib (PF-02341066)           |
| Chemicals | S1068 |                                                                                                                                                                                                                                       |                  |          |                                    |
| Selleck   |       | <chem>c1cccc2c1c(CNc3ccc(Nc4cncn4)cc3)c[nH]2</chem>                                                                                                                                                                                   | C21H20N4         | 328.41   | JNJ-26854165 (Serdemetan)          |
| Chemicals | S1172 |                                                                                                                                                                                                                                       |                  |          |                                    |
| Selleck   |       | <chem>c1(c2cc3c(C=CN4C3=NNC4=O)nc2c5ccc(C6(N)CCC6)cc5)ccccc1.Cl.Cl</chem>                                                                                                                                                             | C25H23Cl2N5O     | 480.389  | MK-2206 2HCl                       |
| Chemicals | S1078 |                                                                                                                                                                                                                                       |                  |          |                                    |
| Selleck   |       | <chem>c1(C=Cc2ccccc2)nc(N3CCN(C)CC3)cc(Nc4cc(C)[nH]n4)n1</chem>                                                                                                                                                                       | C21H25N7         | 375.47   | ENMD-2076                          |
| Chemicals | S1181 |                                                                                                                                                                                                                                       |                  |          |                                    |
| Selleck   |       | <chem>c1cc2c(c(CN(C)C)c(C(NCCO)c3ccc(C(NO)=O)cc3)=O)cc1</chem>                                                                                                                                                                        | C21H23N3O5       | 397.424  | PCI-24781 (Abexinostat)            |
| Chemicals | S1090 |                                                                                                                                                                                                                                       |                  |          |                                    |
| Selleck   |       | <chem>C1(=O)c(c2C(=O)N1C3CCC(=O)NC3=O)ccccc2</chem>                                                                                                                                                                                   | C13H10N2O4       | 258.23   | Thalidomide                        |
| Chemicals | S1193 |                                                                                                                                                                                                                                       |                  |          |                                    |

|           |       |                                                                                                                                                                                      |                |         |                            |
|-----------|-------|--------------------------------------------------------------------------------------------------------------------------------------------------------------------------------------|----------------|---------|----------------------------|
| Selleck   |       |                                                                                                                                                                                      |                |         | Rucaparib (AG-             |
| Chemicals | S1098 | <chem>c1([nH]c2c(c3cc(F)c2)c1CCNC3=O)c4ccc(CNC)cc4.P(O)(O)(O)=O</chem>                                                                                                               | C19H21FN3O5P   | 421.359 | 014699,PF-01367338)        |
| Selleck   |       |                                                                                                                                                                                      |                |         |                            |
| Chemicals | S1204 | <chem>c1c2c(c(CCN(C)=O)c[nH]2)cc(O)c1</chem>                                                                                                                                         | C13H16N2O2     | 232.278 | Melatonin                  |
| Selleck   |       |                                                                                                                                                                                      |                |         |                            |
| Chemicals | S1213 | <chem>n1c(OC)c2c(n([C@@H]3O[C@H](CO)[C@@H](O)[C@@H]3O)cn2)nc1N[C@@H]1(C)O[C@H](O[C@@H]2([H])C[C@](O)(C=O)CO)Cc3c2c(O)c4c(C(=O)c5c(c(O)c5)C4=O)c3O)C[C@H](N)[C@@H]1O[C@@H]6CCC</chem> | C11H15N5O5     | 297.267 | Nelarabine                 |
| Selleck   |       |                                                                                                                                                                                      |                |         |                            |
| Chemicals | S1393 | <chem>CO6</chem>                                                                                                                                                                     | C32H37NO12     | 627.636 | Pirarubicin                |
| Selleck   |       |                                                                                                                                                                                      |                |         |                            |
| Chemicals | S1226 | <chem>n1c(N2CCOCC2)c3c(nc(c4ccc(OC)c(CO)c4)cc3)nc1N5C[C@H](C)O[C@H](C)C5</chem>                                                                                                      | C25H31N5O4     | 465.545 | KU-0063794                 |
| Selleck   |       |                                                                                                                                                                                      |                |         |                            |
| Chemicals | S1407 | <chem>c1ccc(CCC(C=C[C@H]2[C@H](O)C[C@H](O)[C@H]2CC=CCCC(NCC)=O)O)cc1</chem>                                                                                                          | C25H37NO4      | 415.566 | Bimatoprost                |
| Selleck   |       |                                                                                                                                                                                      |                |         |                            |
| Chemicals | S1243 | <chem>C(NCCc1c(c2ccc1)cc(OC)cc2)(=O)C</chem>                                                                                                                                         | C15H17NO2      | 243.301 | Agomelatine                |
| Selleck   |       |                                                                                                                                                                                      |                |         |                            |
| Chemicals | S1431 | <chem>c1(S(=O)(=O)N2CCN(C)CC2)cc(C(=O)N(C=O)c3c4c(CCC)nn3C)=N4)c(OCC)c1.C(C(C(=O)O)(O)CC(=O)O)C(=O)O</chem>                                                                          | C28H38N6O11S   | 666.7   | Sildenafil Citrate         |
| Selleck   |       |                                                                                                                                                                                      |                |         |                            |
| Chemicals | S1257 | <chem>c1(N2C=NN([C@@H](CC)[C@@H](O)C)C2=O)ccc(N3CCN(c4ccc(OC[C@H]5C[C@](Cn6cncn6)(c7c(F)cc(F)cc7)OC5)cc4)CC3)cc1</chem>                                                              | C37H42F2N8O4   | 700.777 | Posaconazole               |
| Selleck   |       |                                                                                                                                                                                      |                |         |                            |
| Chemicals | S1453 | <chem>c1c([C@@](N)(c2ccc3c(C(c4ccc(Cl)c4)=CC(=O)N3C)c2)c5n(C)cnc5)ccc(Cl)c1</chem>                                                                                                   | C27H22Cl2N4O   | 489.396 | Tipifarnib                 |
| Selleck   |       |                                                                                                                                                                                      |                |         |                            |
| Chemicals | S1271 | <chem>[C@@H]1(N[C@@H]2[C@@H](O)[C@@H](O)[C@H](O)C(CO)=C2)[C@H](C)O[C@H](O)[C@@H]3[C@H](CO)O[C@H](O)[C@@H]4[C@H](CO)O[C@@H](O)[C@H](O)[C@H]4O)[C@H](O)[C@H]3O)[C@H](O)[C@H]1O</chem>  | C25H43NO18     | 645.605 | Acarbose                   |
| Selleck   |       |                                                                                                                                                                                      |                |         |                            |
| Chemicals | S1462 | <chem>C(O)=O)c1cccc1N[C@@H](C(C(N2C=C3C)=NC(N4CCOCC4)=CC2=O)=C3)C</chem>                                                                                                             | C22H24N4O4     | 408.45  | AZD6482                    |
| Selleck   |       |                                                                                                                                                                                      |                |         |                            |
| Chemicals | S1287 | <chem>c1c(C(O)=O)cc(NCCCC)c(Oc2ccccc2)c1S(N)(=O)=O</chem>                                                                                                                            | C17H20N2O5S    | 364.416 | Bumetanide                 |
| Selleck   |       |                                                                                                                                                                                      |                |         |                            |
| Chemicals | S1476 | <chem>c1(c2c(c3nc(C)ccc3)nc(C(C)(C)C)[nH]2)cc4c(ncn4)cc1</chem>                                                                                                                      | C21H21N5       | 343.425 | SB525334                   |
| Selleck   |       |                                                                                                                                                                                      |                |         |                            |
| Chemicals | S1302 | <chem>C1CN(CCCl)P(=O)(NCCCl)OC1</chem>                                                                                                                                               | C7H15Cl2N2O2P  | 261.086 | Ifosfamide                 |
| Selleck   |       |                                                                                                                                                                                      |                |         |                            |
| Chemicals | S1487 | <chem>[nH]1c2c(CN(C(=O)C3CCN(C)CC3)C2(C)C)c(NC(=O)CC(C)C)n1</chem>                                                                                                                   | C19H31N5O2     | 361.482 | PHA-793887                 |
| Selleck   |       |                                                                                                                                                                                      |                |         |                            |
| Chemicals | S1336 | <chem>c1(C(F)(F)F)ccc(C(=NOCCN)CCCCOC)cc1.C(=CC(O)=O)C(O)=O</chem>                                                                                                                   | C19H25F3N2O6   | 434.407 | Fluvoxamine maleate        |
| Selleck   |       |                                                                                                                                                                                      |                |         |                            |
| Chemicals | S1502 | <chem>c1ccc([C@@H](N)C(=O)N[C@H]2[C@@]3([H])N(C(C(O)=O)=C(C)CS3)C2=O)cc1</chem>                                                                                                      | C16H17N3O4S    | 347.389 | Cephalexin                 |
| Selleck   |       |                                                                                                                                                                                      |                |         |                            |
| Chemicals | S1363 | <chem>c1c(Oc2cc(F)c(NC(=O)Nc3c(F)cc(F)cc3)cc2)c4c(cc(OC)c(OC)c4)nc1</chem>                                                                                                           | C24H18F3N3O4   | 469.413 | Ki8751                     |
| Selleck   |       |                                                                                                                                                                                      |                |         |                            |
| Chemicals | S1519 | <chem>c1(Cl)c(N2CCN(CC(=O)Nc3nccs3)CC2)c4c([nH]c(c5ccc(N(C)C)cc5)n4)nc1</chem>                                                                                                       | C23H25ClN8OS   | 497.016 | CCT129202                  |
| Selleck   |       |                                                                                                                                                                                      |                |         |                            |
| Chemicals | S1379 | <chem>C(O)(=O)C=C(C(C)C)=CC=C(C(C)C)=CC(C(C)(C)CCC1)=C1C</chem>                                                                                                                      | C20H28O2       | 300.435 | Isotretinoin               |
| Selleck   |       |                                                                                                                                                                                      |                |         |                            |
| Chemicals | S1531 | <chem>c1cc2c(NC(=O)C2=C(c3ccccc3)Nc4cccc(CN(C)C)c4)cc1C(=O)N(C)C</chem>                                                                                                              | C27H28N4O2     | 440.537 | BIX 02189                  |
| Selleck   |       |                                                                                                                                                                                      |                |         |                            |
| Chemicals | S1002 | <chem>c1c(C(NS(=O)=O)=O)c2cc([N+])([O-])=O)c(N[C@H](CCN(C)C)CS c3ccccc3)cc2=O)ccc(N4CCN(Cc5ccccc5c6c</chem>                                                                          | C42H45ClN6O5S2 | 813.427 | ABT-737                    |
| Selleck   |       |                                                                                                                                                                                      |                |         |                            |
| Chemicals | S1109 | <chem>c1(C(=O)NC2CCN(C)CC2)cc(OC)c(Nc3nc4c(N(C)C(=O)[C@@H](CC)N4C5CCCC5)cn3)cc1</chem>                                                                                               | C28H39N7O3     | 521.654 | BI 2536                    |
| Selleck   |       |                                                                                                                                                                                      |                |         |                            |
| Chemicals | S1012 | <chem>c1(N2CCOCC2)cc3c(nc(C(C(=O)NC=C4)=C4NC[C@@H](O)c5cc(Cl)ccc5)[nH]3)c(C)c1</chem>                                                                                                | C25H26ClN5O3   | 479.959 | BMS-536924                 |
| Selleck   |       |                                                                                                                                                                                      |                |         |                            |
| Chemicals | S1117 | <chem>[C@H]1(O)[C@@H](n2cc3c(c4N(C)N=C3N)c2ncn4)O[C@H](CO)[C@H]1O</chem>                                                                                                             | C13H16N6O4     | 320.304 | Triciribine                |
| Selleck   |       |                                                                                                                                                                                      |                |         |                            |
| Chemicals | S1026 | <chem>c1(NC(c2ccc(CN3CCN(C)CC3)cc2)=O)cc(Nc4nc(c5cnc5)ccn4)c(C)cc1.O</chem>                                                                                                          | C30H35N7O4S    | 589.708 | Imatinib Mesylate (ST1571) |
| Selleck   |       |                                                                                                                                                                                      |                |         |                            |
| Chemicals | S1132 | <chem>c1c(C(N)=O)cc(N)cc1</chem>                                                                                                                                                     | C7H8N2O        | 136.151 | INO-1001                   |
| Selleck   |       |                                                                                                                                                                                      |                |         |                            |
| Chemicals | S1036 | <chem>c1c(C(NOC[C@@H](CO)O)=O)c(Nc2c(F)cc(1)cc2)c(F)c(F)c1</chem>                                                                                                                    | C16H14F3IN2O4  | 482.193 | PD0325901                  |
| Selleck   |       |                                                                                                                                                                                      |                |         |                            |
| Chemicals | S1143 | <chem>c1(O)cc(C=C(C#N)C(=O)NCc2ccccc2)ccc1O</chem>                                                                                                                                   | C17H14N2O3     | 294.305 | AG-490 (Tyrphostin B42)    |
| Selleck   |       |                                                                                                                                                                                      |                |         |                            |
| Chemicals | S1045 | <chem>c1cc(C(=O)[C@H](C)C=C(C)C=CC(=O)NO)ccc1N(C)C</chem>                                                                                                                            | C17H22N2O3     | 302.368 | Trichostatin A (TSA)       |
| Selleck   |       |                                                                                                                                                                                      |                |         |                            |
| Chemicals | S1155 | <chem>c1(C)ccc(S(=O)(=O)OCC(=O)Nc2cc(O)c(C(=O)O)cc2)cc1</chem>                                                                                                                       | C16H15NO7S     | 365.358 | S3I-201                    |

|           |       |                                                                                                                                                                 |                 |         |                                   |
|-----------|-------|-----------------------------------------------------------------------------------------------------------------------------------------------------------------|-----------------|---------|-----------------------------------|
| Selleck   |       | <chem>C1OC[C@@H](COC(=O)Nc2c(C)c3n(ncnc3Nc4ccc5c(cnn5Cc6cccc(F)c6)c4)c2)NC1.Cl</chem>                                                                           | C27H28ClFN8O3   | 567.014 | AC480 (BMS-599626)                |
| Chemicals | S1056 |                                                                                                                                                                 |                 |         |                                   |
| Selleck   |       | <chem>c1cc(S(Nc2ccnc2Nc3ccc(O)cc3)(=O)=O)ccc1OC</chem>                                                                                                          | C18H17N3O4S     | 371.41  | ABT-751 (E7010)                   |
| Chemicals | S1165 |                                                                                                                                                                 |                 |         |                                   |
| Selleck   |       | <chem>c1(O)c(c2onc(C(NCC)=O)c2c3ccc(CN4CCOCC4)cc3)cc(C(C)C)c(O)c1</chem>                                                                                        | C26H31N3O5      | 465.541 | AUY922 (NVP-AUY922)               |
| Chemicals | S1069 |                                                                                                                                                                 |                 |         |                                   |
| Selleck   |       | <chem>c1(N2CCN(C)CC2)ccc(Nc3nc(Oc4cccc(NC(=O)C=C)c4)c(Cl)cn3)c(O)C)c1</chem>                                                                                    | C25H27ClN6O3    | 494.973 | WZ4002                            |
| Chemicals | S1173 |                                                                                                                                                                 |                 |         |                                   |
| Selleck   |       | <chem>c1(Cl)cc(N(S(=O)(=O)c2ccc3c(C=Cc4c(C)c(C(=O)N5CCN(C)CC5)c(C)[nH]4)C(=O)N3)c2)C)ccc1</chem>                                                                | C28H30ClN5O4S   | 568.087 | SU11274                           |
| Chemicals | S1080 |                                                                                                                                                                 |                 |         |                                   |
| Selleck   |       | <chem>[C@@H]1(O)C(=O)N2Cc3c(cccc3F)C2)C[C@@H]4N(C(=O)[C@@H](NC(=O)O)C(C)(C)CCCCC=C[C@@H]5[C@](C5)(C(=O)NS(C6CC6)(=O)=O)NC4=O)C1</chem>                          | C35H46FN5O9S    | 731.831 | Danoprevir (ITMN-191)             |
| Chemicals | S1183 |                                                                                                                                                                 |                 |         |                                   |
| Selleck   |       | <chem>c1cc2c(nc(c3ccccc3)cc2)cc1c4nc([C@@H]5C[C@@](O)(C)C5)n6c4c(N)ccc6</chem>                                                                                  | C26H23N5O       | 421.494 | OSI-906 (Linsitinib)              |
| Chemicals | S1091 |                                                                                                                                                                 |                 |         |                                   |
| Selleck   |       | <chem>c(cc(OCCCCCCC(=O)NO)c(OC)c1)c(Nc2cccc(C#C)c2)ncn3)c13</chem>                                                                                              | C24H26N4O4      | 434.488 | CUDC-101                          |
| Chemicals | S1194 |                                                                                                                                                                 |                 |         |                                   |
| Selleck   |       | <chem>c1cc2c(C(c3c(F)cccc3F)=NCc4c2nc(Nc5ccc(C(O)=O)cc5)nc4)cc1Cl</chem>                                                                                        | C25H15ClF2N4O2  | 476.862 | MLN8054                           |
| Chemicals | S1100 |                                                                                                                                                                 |                 |         |                                   |
| Selleck   |       | <chem>c1cc2n(C(C=NN(C)S(=O)(=O)c3cc([N+](=[O-])=O)ccc3C)cn2)cc1Br.Cl</chem>                                                                                     | C16H15BrClN5O4S | 488.743 | PIK-75                            |
| Chemicals | S1205 |                                                                                                                                                                 |                 |         |                                   |
| Selleck   |       | <chem>n1c(N)c2c(n([C@@H]3O[C@H](CO)[C@@H](O)[C@@H]3F)cn2)nc1Cl</chem>                                                                                           | C10H11ClFN5O3   | 303.677 | Clofarabine                       |
| Chemicals | S1218 |                                                                                                                                                                 |                 |         |                                   |
| Selleck   |       | <chem>c1(O)ccc(C=Cc2cc(O)cc(O)c2)cc1</chem>                                                                                                                     | C14H12O3        | 228.243 | Resveratrol                       |
| Chemicals | S1396 |                                                                                                                                                                 |                 |         |                                   |
| Selleck   |       | <chem>c1(O)cc2c(C(C(=O)c3ccc(OCCN4CCCC4)cc3)c(c5ccc(O)cc5)s2)cc1.Cl</chem>                                                                                      | C28H28ClNO4S    | 510.044 | Raloxifene HCl                    |
| Chemicals | S1227 |                                                                                                                                                                 |                 |         |                                   |
| Selleck   |       | <chem>c1cc(N2C(=O)O[C@@H](CNC(=O)C)C2)cc(F)c1N3CCOCC3</chem>                                                                                                    | C16H20FN3O4     | 337.346 | Linezolid                         |
| Chemicals | S1408 |                                                                                                                                                                 |                 |         |                                   |
| Selleck   |       | <chem>c1cc2c(cc3c2ncnc3N4CCN(C(NCc5cc6c(OCO6)cc5)=S)CC4)cc1</chem>                                                                                              | C23H21N5O3S     | 447.51  | Amuvatinib (MP-470)               |
| Chemicals | S1244 |                                                                                                                                                                 |                 |         |                                   |
| Selleck   |       | <chem>c1(Cl)c(NC2=NCCN2)c3c(nsn3)cc1.Cl</chem>                                                                                                                  | C9H9Cl2N5S      | 290.172 | Tizanidine HCl                    |
| Chemicals | S1437 |                                                                                                                                                                 |                 |         |                                   |
| Selleck   |       | <chem>C(=O)(C1CC1)C(N2Cc3c(sc(OC(C)=O)c3)CC2)c4cccc4F</chem>                                                                                                    | C20H20FNO3S     | 373.441 | Prasugrel                         |
| Chemicals | S1258 |                                                                                                                                                                 |                 |         |                                   |
| Selleck   |       | <chem>c1(N2CCN(C)CC2)ccc(C(Nc3n[nH]c4c3CN(C(Nc5c(CC)cccc5CC)=O)C4)=O)cc1</chem>                                                                                 | C28H35N7O2      | 501.623 | PHA-680632                        |
| Chemicals | S1454 |                                                                                                                                                                 |                 |         |                                   |
| Selleck   |       | <chem>N1(C(Nc2cccc(Nc3ncc(Br)c(NCCc4[nH]cnc4)n3)c2)=O)CCCC1</chem>                                                                                              | C20H23BrN8O     | 471.354 | BX-912                            |
| Chemicals | S1275 |                                                                                                                                                                 |                 |         |                                   |
| Selleck   |       | <chem>c1(F)cc2c(N(C3CC3)C=C(C(=O)O)C2=O)c(OC)c1N4C[C@@]5([H])[C@]([H])(NCCC5)C4.Cl</chem>                                                                       | C21H25ClFN3O4   | 437.892 | Moxifloxacin HCl                  |
| Chemicals | S1465 |                                                                                                                                                                 |                 |         |                                   |
| Selleck   |       | <chem>O1CC2=C(C=C3N(Cc4c3nc5c(cccc5)c4)C2=O)[C@@](O)(CC)C1=O</chem>                                                                                             | C20H16N2O4      | 348.352 | Camptothecin                      |
| Chemicals | S1288 |                                                                                                                                                                 |                 |         |                                   |
| Selleck   |       | <chem>C1[C@@H](C)[C@@H](C[C@@H](O)C)O[C@]2(O[C@@H]3[C@@]([H])(C)[C@@H](O)C(=O)C=C[C@@H](C)[C@@H](O)[C@@H](C)C(=O)[C@@H](C)CC=CC[C@@H](CC)CC3)[C@@H]2C)C1</chem> | C45H74O11       | 791.062 | Oligomycin A                      |
| Chemicals | S1478 |                                                                                                                                                                 |                 |         |                                   |
| Selleck   |       | <chem>C1C[C@@]2(C)C(C(C)=C[C@@]3([H])[C@@]2([H])CC[C@@]4(C)[C@@]3([H])OC[C@@]4(OC(C)=O)C(=O)C)=CC1=O</chem>                                                     | C24H32O4        | 384.508 | Megestrol Acetate                 |
| Chemicals | S1304 |                                                                                                                                                                 |                 |         |                                   |
| Selleck   |       | <chem>c1(CCS(NC)(=O)=O)cc2c([nH]cc2C3CCN(C)CC3)cc1.Cl</chem>                                                                                                    | C17H26ClN3O2S   | 371.925 | Naratriptan                       |
| Chemicals | S1488 |                                                                                                                                                                 |                 |         |                                   |
| Selleck   |       | <chem>c1(O)cc(O)c2c(OC=C(c3ccc(O)cc3)C2=O)c1</chem>                                                                                                             | C15H10O5        | 270.237 | Genistein                         |
| Chemicals | S1342 |                                                                                                                                                                 |                 |         |                                   |
| Selleck   |       | <chem>N1(C)C(=O)c2c(ncn2CC(O)CO)N(C)C1=O</chem>                                                                                                                 | C10H14N4O4      | 254.243 | Dyphylline                        |
| Chemicals | S1504 |                                                                                                                                                                 |                 |         |                                   |
| Selleck   |       | <chem>O1[C@@H]([C@]12C)C[C@H](C=Cc3cc(C)n3)OC(=O)C[C@@H](O)C(C)(C)C(=O)[C@@H](C)[C@@H](O)[C@@H](C)CCC2</chem>                                                   | C27H41NO6S      | 507.683 | Epothilone B (EPO906, Patupilone) |
| Chemicals | S1364 |                                                                                                                                                                 |                 |         |                                   |
| Selleck   |       | <chem>c1(nc(Nc2cc(OC)cc(OC)c2)c(NS(=O)(=O)c3ccc(NC(c4cc(OC)c(C)cc4)=O)cc3)n5)c5cccc1</chem>                                                                     | C31H29N5O6S     | 599.657 | SAR245409 (XL765)                 |
| Chemicals | S1523 |                                                                                                                                                                 |                 |         |                                   |
| Selleck   |       | <chem>c1c(C)c(OC(C)=O)N[C@@H]([C@@H](O)C[C@@H](NC([C@@H](C(C)C)N2C(=O)NCCC2)=O)Cc3ccccc3)Cc4ccccc4)c(C)cc1</chem>                                               | C37H48N4O5      | 628.801 | Lopinavir                         |
| Chemicals | S1380 |                                                                                                                                                                 |                 |         |                                   |
| Selleck   |       | <chem>c1(F)cc(c2cc(NC(=O)N)c(C(=O)N[C@@H]3CCCCNC3)s2)ccc1</chem>                                                                                                | C17H19FN4O2S    | 362.422 | AZD7762                           |
| Chemicals | S1532 |                                                                                                                                                                 |                 |         |                                   |
| Selleck   |       | <chem>c1([nH]nc2N)c2c(c3ccc(NC(Nc4cc(C)ccc4F)=O)cc3)ccc1</chem>                                                                                                 | C21H18FN5O      | 375.399 | Linifanib (ABT-869)               |
| Chemicals | S1003 |                                                                                                                                                                 |                 |         |                                   |
| Selleck   |       | <chem>c1(CC)c(C(=O)O)C(=O)Nc2c(cccc2OCC(O)=O)n1c3ccccc3</chem>                                                                                                  | C21H20N2O5      | 380.394 | Varespladib (LY315920)            |
| Chemicals | S1110 |                                                                                                                                                                 |                 |         |                                   |

|           |       |                                                                       |                  |         |                         |  |
|-----------|-------|-----------------------------------------------------------------------|------------------|---------|-------------------------|--|
| Selleck   |       |                                                                       |                  |         |                         |  |
| Chemicals | S1013 | c1nc(C(=O)N[C@@H](Cc2ccccc2)C(=O)N[C@@H](CC(C)C)B(O)O)cnc1            | C19H25BN4O4      | 384.237 | Bortezomib (PS-341)     |  |
| Selleck   |       |                                                                       |                  |         |                         |  |
| Chemicals | S1118 | c1cc2c(nc(NS(c3ccc(C)cc3)(=O)=O)c(Nc4ccc5c(nsn5)c4)n2)cc1             | C21H16N6O2S2     | 448.521 | XL147                   |  |
| Selleck   |       | c1cc2c(c(Nc3cc(Cl)c(OCC4cc(F)ccc4)cc3)nccn2)cc1c5ccc(CNCCS(=O)(C)=    |                  |         | Lapatinib (GW-572016)   |  |
| Chemicals | S1028 | O)o5.c6cc(S(=O)(=O)O)ccc6C.c7cc(S(=O)(=O)O)ccc7C                      | C43H42CIFN4O10S3 | 925.461 | Ditosylate              |  |
| Selleck   |       | c1c(OCC)c(Cc2c(ccc(Cl)c2)c3c(cnc(Nc4ccc(C(=O)O)c(OCC)c4)n3)C5=N5)c(F) | C27H20CIFN4O4    | 518.924 | Alisertib (MLN8237)     |  |
| Chemicals | S1133 | F)cc1                                                                 |                  |         |                         |  |
| Selleck   |       |                                                                       |                  |         |                         |  |
| Chemicals | S1038 | c(cc1c2cccn1)(c(N3CCOCC3)nc(c4cc(O)ccc4)n5)c25                        | C19H16N4O3       | 348.355 | PI-103                  |  |
| Selleck   |       |                                                                       |                  |         |                         |  |
| Chemicals | S1144 | c1c(C(C)(C)C)c(NC(=O)C2=CNc3c(cccc3)C2=O)cc(O)c1C(C)(C)C              | C24H28N2O3       | 392.491 | Ivacaftor (VX-770)      |  |
| Selleck   |       |                                                                       |                  |         |                         |  |
| Chemicals | S1046 | c(cc(OCC1CCN(C)CC1)c(OC)c2)(nnc3Nc4ccc(Br)cc4F)c23                    | C22H24BrFN4O2    | 475.354 | Vandetanib (ZD6474)     |  |
| Selleck   |       | N(C(=O)N([C@H]1[C@@H](O)[C@H](O)[C@@H](CO)1)C=C2F)=C2NC(              |                  |         |                         |  |
| Chemicals | S1156 | =O)OCCCCC                                                             | C15H22FN3O6      | 359.35  | Capecitabine            |  |
| Selleck   |       |                                                                       |                  |         | Obatoclox Mesylate      |  |
| Chemicals | S1057 | c1cc2c([nH]c(C3=NC(=Cc4[nH]c(C)cc4C)C(OC)=C3)c2)cc1.CS(O)(=O)=O       | C21H23N3O4S      | 413.49  | (GX15-070)              |  |
| Selleck   |       |                                                                       |                  |         |                         |  |
| Chemicals | S1166 | [Pt](N)(Cl)(Cl)N                                                      | Cl2H4N2Pt        | 298.029 | Cisplatin               |  |
| Selleck   |       | c1c(Cl)c(CS(=O)(=O)c2ccc3c(C(=Cc4[nH]c(C)C(C(=O)N5CCC[C@@H]5C         |                  |         |                         |  |
| Chemicals | S1070 | N6CCCC6)c4C)C(=O)N3)c2)c(Cl)cc1                                       | C32H34Cl2N4O4S   | 641.608 | PHA-665752              |  |
| Selleck   |       |                                                                       |                  |         |                         |  |
| Chemicals | S1174 | C(Nc1ccc(C#N)c(C(F)(F)F)c1)(=O)[C@](O)(C)COc2ccc(C#N)cc2              | C19H14F3N3O3     | 389.328 | MK-2866 (GTx-024)       |  |
| Selleck   |       |                                                                       |                  |         |                         |  |
| Chemicals | S1082 | c1(Cl)ccc(NC(=O)c2c(Cl)cc(S(=O)(=O)C)cc2)cc1c3ccccc3                  | C19H14Cl2N2O3S   | 421.297 | Vismodegib (GDC-0449)   |  |
| Selleck   |       | c1c(C[C@H](NC(=O)OCC2scnc2)[C@@H](O)[C@@H](NC(=O)[C@H](C              |                  |         |                         |  |
| Chemicals | S1185 | (C)C)NC(=O)N(C)Cc3nc(C(C)C)sc3)Cc4ccccc4)ccccc1                       | C37H48N6O5S2     | 720.944 | Ritonavir               |  |
| Selleck   |       |                                                                       |                  |         | KU-55933 (ATM Kinase    |  |
| Chemicals | S1092 | c1cc2c(Sc3c(c(C(OC(N4CCOCC4)=CC5=O)=C5)ccc3)S2)cc1                    | C21H17NO3S2      | 395.495 | Inhibitor)              |  |
| Selleck   |       | C1(=O)C=C([C@]2(C)C=C1)C(=O)C[C@]([H])([C@]23[H])(C@@)([H])([C        |                  |         |                         |  |
| Chemicals | S1196 | @@]4(C)CC3)CC4=O                                                      | C20H24O2         | 296.403 | Exemestane              |  |
| Selleck   |       |                                                                       |                  |         |                         |  |
| Chemicals | S1101 | c1cc2c(c(Cc3ccncc3)nnc2Nc4ccc(Cl)cc4)cc1.Cl.Cl                        | C20H17Cl3N4      | 419.735 | Vatalanib (PTK787) 2HCl |  |
| Selleck   |       |                                                                       |                  |         |                         |  |
| Chemicals | S1206 | c1cc(OCC(CNC(C)C)O)ccc1COCCOC(C)C.OCC(=O)C=CC(=O)O                    | C22H35NO8        | 441.515 | Bisoprolol fumarate     |  |
| Selleck   |       |                                                                       |                  |         |                         |  |
| Chemicals | S1219 | c1nc(N)ccc1C(Nc2ccccc3c3nc(N4CCOCC4)c5c(c6c(ncoc6)o5)n3)c2=O          | C25H21N7O3       | 467.479 | YM201636                |  |
| Selleck   |       | [C@H]1(N2CCOCC2)C[C@@]3(C)[C@@]([H])(CC[C@]4([H])(C@@]3([H])          |                  |         |                         |  |
| Chemicals | S1397 | CC[C@@]5(C)[C@@]4([H])C[C@H]([N+](CC=C)CCCC6)[C@H]5OC(C)=             |                  |         |                         |  |
| Selleck   |       | O)C[C@@H]1O.[Br-]                                                     | C32H53BrN2O4     | 609.678 | Rocuronium Bromide      |  |
| Chemicals | S1229 | n1c(N)c2c(n([C@@H]3O[C@H](COP(O)(O)=O)[C@@H](O)[C@@H]3O)c             |                  |         |                         |  |
| Selleck   |       | n2)nc1F                                                               | C10H13FN5O7P     | 365.212 | Fludarabine Phosphate   |  |
| Chemicals | S1409 | c1(OC)cc2c(nc(N(C)CCCNC(=O)C3OCCC3)nc2N)cc1OC.Cl                      | C19H28ClN5O4     | 425.91  | Alfuzosin HCl           |  |
| Selleck   |       |                                                                       |                  |         |                         |  |
| Chemicals | S1247 | c1(NC(=O)c2c(C)onc2)ccc(C(F)(F)F)cc1                                  | C12H9F3N2O2      | 270.207 | Leflunomide             |  |
| Selleck   |       |                                                                       |                  |         |                         |  |
| Chemicals | S1439 | c1(OC)cc(C=CC(=O)Nc2c(C(=O)O)cccc2)ccc1OC                             | C18H17NO5        | 327.331 | Tranilast               |  |
| Selleck   |       |                                                                       |                  |         |                         |  |
| Chemicals | S1260 | c1ccc(CCCN[C@]([H])(C)c2c3c(cccc3)ccc2)cc1C(F)(F)F.Cl                 | C22H23ClF3N      | 393.873 | Cinacalcet HCl          |  |
| Selleck   |       |                                                                       |                  |         |                         |  |
| Chemicals | S1455 | c1(OC2CCCC2)cc(C3(C#N)CCC([H])(C(O)=O)CC3)ccc1OC                      | C20H25NO4        | 343.417 | Cilomilast              |  |
| Selleck   |       |                                                                       |                  |         |                         |  |
| Chemicals | S1276 | c1(C2(CC(CC3C2)CC4C3)C4)cc(c5ccc6c(ccc(C(=O)O)c6)c5)ccc1OC            | C28H28O3         | 412.52  | Adapalene               |  |
| Selleck   |       | [C@@H]1(O)CC(=CC=C2CCC[C@@]3(C)[C@@]2([H])CC[C@H]3[C@H](              |                  |         |                         |  |
| Chemicals | S1466 | C)CCCC(O)(C)C(C)=C)[C@@H](O)C1                                        | C27H44O3         | 416.636 | Calcitriol              |  |
| Selleck   |       |                                                                       |                  |         |                         |  |
| Chemicals | S1289 | C1(F)=CN(C(=O)NCCCCC)C(=O)NC1=O                                       | C11H16FN3O3      | 257.261 | Carmofur                |  |
| Selleck   |       | c(cccn1)(c(OCC[C@H](O)CN2CCN([C@H]3c4c(cccc4)[C@H]5[C@H](C5(F)        |                  |         | Zosuquidar (LY335979)   |  |
| Chemicals | S1481 | F)c6c3cccc6)CC2)ccc7c17.Cl.Cl.Cl                                      | C32H34Cl3F2N3O2  | 636.987 | 3HCl                    |  |
| Selleck   |       |                                                                       |                  |         |                         |  |
| Chemicals | S1312 | [C@H]1(O)O[C@H](CO)[C@@H](O)[C@H](O)[C@H]1NC(=O)N(C)N=O               | C8H15N3O7        | 265.221 | Streptozotocin (STZ)    |  |
| Selleck   |       |                                                                       |                  |         |                         |  |
| Chemicals | S1489 | c1(Cl)ccc(c2c(C)nc(NC(=O)C)s2)cc1S(NCCO)(=O)=O                        | C14H16ClN3O4S2   | 389.878 | PIK-93                  |  |
| Selleck   |       | c1cc(S(=O)(=O)N(C(=O)N[C@H]2CC[C@H](C)CC2)ccc1CCNC(=O)N3C(=           |                  |         |                         |  |
| Chemicals | S1344 | O)C(CC)=C(C)C3                                                        | C24H34N4O5S      | 490.616 | Glimepiride             |  |

|                      |       |                                                                                                                                                                                                                                                                                      |               |         |                                  |
|----------------------|-------|--------------------------------------------------------------------------------------------------------------------------------------------------------------------------------------------------------------------------------------------------------------------------------------|---------------|---------|----------------------------------|
| Selleck<br>Chemicals | S1505 | <chem>[C@H]1N(C(=O)C(c2csc(N)n2)=NOC(C)(C)C(=O)O)[C@@H](C)N(S(=O)(=O)O)C1=O</chem>                                                                                                                                                                                                   | C13H17N5O8S2  | 435.433 | Aztreonam                        |
| Selleck<br>Chemicals | S1366 | <chem>c1(F)ccc(CNC(=O)C2=C(O)C(C)=O)N(C)C(N3CCCCS3(=O)=O)=N2)cc1</chem>                                                                                                                                                                                                              | C17H19FN4O5S  | 410.42  | BMS-707035                       |
| Selleck<br>Chemicals | S1524 | <chem>c1ccc(Cl)c(C(=O)Nc2c(C(=O)NC3CCNCC3)=O)n[nH]c2)c1Cl</chem>                                                                                                                                                                                                                     | C16H17Cl2N5O2 | 382.244 | AT7519                           |
| Selleck<br>Chemicals | S1381 | <chem>N(C(C(=O)O)=C(SC1CNC(C(N(C)C)=O)C1)C2C)(C(=O)C3C(O)C)C23</chem>                                                                                                                                                                                                                | C17H25N3O5S   | 383.463 | Meropenem                        |
| Selleck<br>Chemicals | S1533 | <chem>c1(OC)c(O)cc(Nc2nc(F)c(Nc3ccc4c(NC(=O)C(C)C(O)4)n3)n2)cc1OC</chem>                                                                                                                                                                                                             | C22H23FN6O5   | 470.454 | R406 (free base)                 |
| Selleck<br>Chemicals | S1004 | <chem>c1c(C(=O)N)c2c([nH]c([C@]3(C)CCCN3)n2)cc1</chem>                                                                                                                                                                                                                               | C13H16N4O     | 244.292 | Veliparib (ABT-888)              |
| Selleck<br>Chemicals | S1111 | <chem>c1(NC(=O)C2(CC2)C(=O)Nc3ccc(Oc4ccnc5c4cc(OC)c(OCCCN6CCOCC6)c5)c(F)c3)ccc(F)cc1</chem>                                                                                                                                                                                          | C34H34F2N4O6  | 632.654 | Foretinib (GSK1363089)           |
| Selleck<br>Chemicals | S1017 | <chem>c1(OC)cc2c(ncnc2Oc3ccc4c(cc(C)[nH]4)c3F)cc1OCCCN5CCCC5</chem>                                                                                                                                                                                                                  | C25H27FN4O3   | 450.505 | Cediranib (AZD2171)              |
| Selleck<br>Chemicals | S1119 | <chem>c(cc(O)C)c(O)C1c1(ncccc2Oc3ccc(NC(=O)C4(CC4)C(=O)Nc5ccc(F)cc5)cc3)c12</chem>                                                                                                                                                                                                   | C28H24FN3O5   | 501.506 | Cabozantinib (XL184, BMS-907351) |
| Selleck<br>Chemicals | S1029 | <chem>c1cc2c(CN(C3CCC(=O)NC3=O)C2=O)c(N)c1</chem>                                                                                                                                                                                                                                    | C13H13N3O3    | 259.261 | Lenalidomide (CC-5013)           |
| Selleck<br>Chemicals | S1134 | <chem>N(C1CC1)C(Nc2c([nH]nc2c3nc4c(ccc(CN5CCOCC5)c4)[nH]3)=O</chem><br><chem>[C@@H]1(O)CC[C@@H](C[C@@H](C)[C@H]2OC(=O)[C@@H](N3C(=O)C(=O)[C@](O)(O)[C@@H]4C[C@@H](OC)C(C)=CC=CC=C[C@@H](C)C[C@@H](C)C(=O)[C@@H](OC)[C@H](O)C(C)=C[C@@H](C)C(=O)C2)[C@H](C)CC4)CCCC3)C[C@H]1OC</chem> | C19H23N7O2    | 381.432 | AT9283                           |
| Selleck<br>Chemicals | S1039 |                                                                                                                                                                                                                                                                                      | C51H79NO13    | 914.172 | Rapamycin (Sirolimus)            |
| Selleck<br>Chemicals | S1145 | <chem>c1(C(C)C(C)oc(CSc2sc(NC(C3CCNCC3)=O)nc2)nc1</chem>                                                                                                                                                                                                                             | C17H24N4O2S2  | 380.528 | SNS-032 (BMS-387032)             |
| Selleck<br>Chemicals | S1047 | <chem>c1cc(NC(CCCCCC(=O)NO)=O)ccc1</chem>                                                                                                                                                                                                                                            | C14H20N2O3    | 264.32  | Vorinostat (SAHA, MK0683)        |
| Selleck<br>Chemicals | S1157 | <chem>C(NC(=O)[C@@H](NC(c1nc(c2ccccc2)ccc1)=O)[C@H](O)C)[C@H](B(O)O)C)C</chem>                                                                                                                                                                                                       | C21H28BN3O5   | 413.275 | CEP-18770 (Delanzomib)           |
| Selleck<br>Chemicals | S1060 | <chem>c1c2c(C(=O)NN=C2Cc3ccc(F)c(C(=O)N4CCN(C(C5CC5)=O)CC4)c3)ccc1</chem>                                                                                                                                                                                                            | C24H23FN4O3   | 434.463 | Olaparib (AZD2281, KU-0059436)   |
| Selleck<br>Chemicals | S1167 | <chem>c1(C=CCNC(=O)COC)cc2c(ncnc2Nc3cc(C)c(Oc4cnc(C)cc4)cc3)cc1</chem>                                                                                                                                                                                                               | C27H27N5O3    | 469.535 | CP-724714                        |
| Selleck<br>Chemicals | S1071 | <chem>c1cc2c([C@@]([H])([C@@H](C(=O)OCC(C#N)C(C(=O)O)CC)=C(N)O2)cc1Br</chem>                                                                                                                                                                                                         | C17H17BrN2O5  | 409.231 | HA14-1                           |
| Selleck<br>Chemicals | S1175 | <chem>n1c(Cl)c2c(n(Cc3ncc(C)c(O)C3C)cn2)nc1N</chem>                                                                                                                                                                                                                                  | C14H15ClN6O   | 318.761 | BIIB021                          |
| Selleck<br>Chemicals | S1084 | <chem>c([nH]c(C)c1)(ccc(Oc2c3n(cc(O[C@H](O)C)c3C)ncn2)c4F)c14</chem>                                                                                                                                                                                                                 | C19H19FN4O3   | 370.378 | Brivanib (BMS-540215)            |
| Selleck<br>Chemicals | S1186 | <chem>c1cc2c(ccc(C(C)=CC(=O)Nc3ccccc3C(O)=O)c2)cc1</chem>                                                                                                                                                                                                                            | C21H17NO3     | 331.365 | BIBR 1532                        |
| Selleck<br>Chemicals | S1093 | <chem>c1ccc(F)c(NC(=O)c2cc(c3nc4n(ccc4)c3c5nc(Nc6cc(C)C)c(N7CCC(N8CCN(S(=O)(=O)C)CC8)CC7)cc6OC)nc5)ccc2OC)c1F</chem>                                                                                                                                                                 | C44H47F2N9O5S | 851.963 | GSK1904529A                      |
| Selleck<br>Chemicals | S1197 | <chem>C1=C[C@@]2(C)[C@@]([H])(CC[C@]3([H])[C@@]2([H])CC[C@@]4(C)[C@@]3([H])CC[C@H]4C(=O)NC(C)C)NC1=O</chem>                                                                                                                                                                          | C23H36N2O2    | 372.544 | Finasteride                      |
| Selleck<br>Chemicals | S1102 | <chem>c1cc(SC(=C(C#N)C(C#N)=C(N)Sc2ccccc2N)N)c(N)cc1.CCO</chem>                                                                                                                                                                                                                      | C20H22N6OS2   | 426.558 | U0126-EtOH                       |
| Selleck<br>Chemicals | S1207 | <chem>c1(Oc2c3c(cc(O)C)c(O)C3)nc2)cc(Cl)c(NC(Nc4ncc(C)c4)=O)cc1</chem>                                                                                                                                                                                                               | C22H19ClN4O5  | 454.863 | Tivozanib (AV-951)               |
| Selleck<br>Chemicals | S1220 | <chem>c1cc2c(nccc2CNc3ccsc3C(=O)Nc4ccc(OC(F)(F)F)cc4)cc1</chem>                                                                                                                                                                                                                      | C22H16F3N3O2S | 443.442 | OSI-930                          |
| Selleck<br>Chemicals | S1398 | <chem>O1C(CO)C=CC1N2C=C(C)C(=O)NC2=O</chem>                                                                                                                                                                                                                                          | C10H12N2O4    | 224.213 | Stavudine (d4T)                  |
| Selleck<br>Chemicals | S1231 | <chem>c1(O)c(CN(C)C)c2c(nc3c(CN4C3=CC5=C(CO)C(=O)[C@]5(O)CC)C4=O)c2)cc1.Cl</chem>                                                                                                                                                                                                    | C23H24ClN3O5  | 457.907 | Topotecan HCl                    |
| Selleck<br>Chemicals | S1415 | <chem>c1c(Cl)c([C@@H](C(OC)=O)N2Cc3c(scc3)CC2)ccc1.OS(=O)(=O)O</chem><br><chem>C(c1c(cc(O)C)[C@@]2(C(=O)O)C(C)[C@](CN3CC(c24)c(c5[nH]4)cccc5)([H])C[C@](CC)(O)C3)c1)N6C)([C@]6([H])[C@](C(OC)=O)(O)[C@H]7OC(C)=O)(CC8)[C@]([H])([C@@]7(CC)C=CC9)N89</chem>                           | C16H18ClNO6S2 | 419.9   | Clopidogrel                      |
| Selleck<br>Chemicals | S1248 |                                                                                                                                                                                                                                                                                      | C46H58N4O9    | 810.974 | Vinblastine                      |
| Selleck<br>Chemicals | S1442 | <chem>c1cc(F)cc(F)c1[C@]([O])([C@@H](C)c2c(F)cn2)Cn3ncnc3</chem>                                                                                                                                                                                                                     | C16H14F3N5O   | 349.31  | Voriconazole                     |
| Selleck<br>Chemicals | S1261 | <chem>c1(n2nc(C(F)F)F)cc2c3ccc(C)cc3)ccc(S(=O)(=O)N)cc1</chem>                                                                                                                                                                                                                       | C17H14F3N3O2S | 381.372 | Celecoxib                        |

|           |       |                                                                                                                          |                 |         |                                              |  |
|-----------|-------|--------------------------------------------------------------------------------------------------------------------------|-----------------|---------|----------------------------------------------|--|
| Selleck   |       |                                                                                                                          |                 |         |                                              |  |
| Chemicals | S1456 | <chem>c1(c2ccc(c3nncoc3)cc2)ncccc1S(Nc4ncc(C)nc4OC)(=O)=O</chem>                                                         | C19H16N6O4S     | 424.433 | Zibotentan (ZD4054)                          |  |
| Selleck   |       |                                                                                                                          |                 |         |                                              |  |
| Chemicals | S1278 | <chem>n1c(N(C)C)nc(N(C)C)nc1N(C)C</chem>                                                                                 | C9H18N6         | 210.279 | Altretamine                                  |  |
| Selleck   |       | <chem>C1[C@@H](O)CC(=CC=C2[C@]3([H])[C@@]([C@]([H])([C@H](C)C</chem>                                                     |                 |         |                                              |  |
| Chemicals | S1467 | <chem>=C[C@@H](C)C(C)C)CC3)CCC2C(=C)[C@H]1O</chem>                                                                       | C28H44O2        | 412.648 | Doxercalciferol                              |  |
| Selleck   |       |                                                                                                                          |                 |         |                                              |  |
| Chemicals | S1291 | <chem>c1c(C(N2CCN(CCOCC(=O)O)CC2)c3ccc(Cl)cc3)cccc1.Cl.Cl</chem>                                                         | C21H27Cl3N2O3   | 461.81  | Cetirizine DiHCl                             |  |
| Selleck   |       | <chem>c1c(c2[nH]c([C@@H]3CCCN3C(=O)[C@@H](NC(=O)OC)C(C)nc2)ccc(c</chem>                                                  |                 |         |                                              |  |
| Chemicals | S1482 | <chem>4ccc(c5[nH]c([C@@H]6CCCN6C(=O)[C@@H](NC(=O)OC)C(C)nc5)cc4)</chem>                                                  | C40H50N8O6      | 738.875 | Daclatasvir (BMS-790052)                     |  |
| Selleck   |       |                                                                                                                          |                 |         |                                              |  |
| Chemicals | S1315 | <chem>c1c(Cl)c(C(OC(Nc2c(c3ccc(CSCCC(=O)O)cc3)onc2C)=O)C)ccc1</chem>                                                     | C23H23ClN2O5S   | 474.957 | Ki16425                                      |  |
| Selleck   |       | <chem>c1cc2n(c(C#Cc3cc(C(Nc4ccc(CN5CCN(C)CC5)c(C(F)(F)F)c4)=O)ccc3C)cn</chem>                                            |                 |         |                                              |  |
| Chemicals | S1490 | <chem>2)nc1</chem>                                                                                                       | C29H27F3N6O     | 532.559 | Ponatinib (AP24534)                          |  |
| Selleck   |       |                                                                                                                          |                 |         |                                              |  |
| Chemicals | S1352 | <chem>c1(c2cccc(O)c2)nc3c(nc(N)nc3N)nc1c4cc(O)ccc4</chem>                                                                | C18H14N6O2      | 346.343 | TG100-115                                    |  |
| Selleck   |       | <chem>[C@@H]1(CCCCCC(=O)O)C(=O)C[C@H](O)[C@H]1C=C[C@@H](O)C</chem>                                                       |                 |         |                                              |  |
| Chemicals | S1508 | <chem>CCCC</chem>                                                                                                        | C20H34O5        | 354.481 | Alprostadil                                  |  |
| Selleck   |       |                                                                                                                          |                 |         |                                              |  |
| Chemicals | S1367 | <chem>c1(ccc2c(c23)c(C(=O)N(CCN(C)C)C3=O)cc(N)c1</chem>                                                                  | C16H17N3O2      | 283.325 | Amonafide                                    |  |
| Selleck   |       | <chem>c1cc(C(C)(C)O)nc(N2c3c(cnc(Nc4ccc(N5CCN(C)CC5)cc4)n3)C(=O)N2CC=C</chem>                                            |                 |         |                                              |  |
| Chemicals | S1525 | <chem>C)c1</chem>                                                                                                        | C27H32N8O2      | 500.595 | MK-1775                                      |  |
| Selleck   |       |                                                                                                                          |                 |         |                                              |  |
| Chemicals | S1382 | <chem>c1(cccc2c2Cc3c(cccc3)C4N1CCN(C)C4.Cl</chem>                                                                        | C18H21ClN2      | 300.826 | Mianserin HCl                                |  |
| Selleck   |       |                                                                                                                          |                 |         |                                              |  |
| Chemicals | S1536 | <chem>c1cc2c(nc(n3cnc(c34)cc(OCCOC)cc4)cc2)c(N5CCC(N)CC5)c1</chem>                                                       | C24H27N5O2      | 417.503 | CP-673451                                    |  |
| Selleck   |       |                                                                                                                          |                 |         |                                              |  |
| Chemicals | S1005 | <chem>c1(Sc2ccc3c([nH]nc3C=Cc4ncccc4)c2)c(C(NC)=O)cccc1</chem>                                                           | C22H18N4OS      | 386.47  | Axitinib                                     |  |
| Selleck   |       |                                                                                                                          |                 |         |                                              |  |
| Chemicals | S1112 | <chem>c1cc(Sc2nnc3n2nc(c4cn(C)nc4)cc3)cc5c1nccc5</chem>                                                                  | C18H13N7S       | 359.408 | SGX-523                                      |  |
| Selleck   |       |                                                                                                                          |                 |         |                                              |  |
| Chemicals | S1020 | <chem>c1cc(C(=O)NOCC2CC2)c(Nc3c(Cl)cc(l)cc3)c(F)c1F</chem>                                                               | C17H14ClF2IN2O2 | 478.66  | PD184352 (Cl-1040)                           |  |
|           |       | <chem>C(CO[C@@H]1CC[C@@H](C[C@H](C)[C@@H]2CC(=O)[C@H](C)C=C(C</chem>                                                     |                 |         |                                              |  |
| Selleck   |       | <chem>C)[C@H](O)[C@@H](OC)C(=O)[C@H](C)C[C@H](C)C=CC=C(C)[C@@@H](OC)C[C@@H](O[C@@]3(O)C(=O)C(=O)N[C@@H]4C(=O)O2)C</chem> |                 |         |                                              |  |
| Chemicals | S1120 | <chem>CCC)CC[C@H]3C)[C@H]1OC)O</chem>                                                                                    | C53H83NO14      | 958.224 | Everolimus (RAD001)                          |  |
| Selleck   |       |                                                                                                                          |                 |         |                                              |  |
| Chemicals | S1030 | <chem>c1(CNCCc2c3c(cccc3)[nH]c2C)ccc(C=CC(NO)=O)cc1</chem>                                                               | C21H23N3O2      | 349.426 | Panobinostat (LBH589)                        |  |
| Selleck   |       |                                                                                                                          |                 |         |                                              |  |
| Chemicals | S1137 | <chem>C(OC(C)C)(=O)C(=C1SC=CS1)C(OC(C)C)=O</chem>                                                                        | C12H16O4S2      | 288.383 | Malotilate                                   |  |
| Selleck   |       | <chem>c1(Cl)c(C(F)(F)F)cc(NC(=O)Nc2ccc(OC3cc(C(=O)NC)ccc3)cc2)cc1.c4c(S(</chem>                                          |                 |         |                                              |  |
| Chemicals | S1040 | <chem>=O)(=O)O)ccc(C)c4</chem>                                                                                           | C28H24ClF3N4O6S | 637.027 | Sorafenib Tosylate                           |  |
| Selleck   |       |                                                                                                                          |                 |         |                                              |  |
| Chemicals | S1147 | <chem>c1(OCCCN(C)CCO)cc2c(c(Nc3cc(C(=O)Nc4cc(F)ccc4)n[nH]3)ncn2)cc1</chem>                                               | C26H30FN7O3     | 507.56  | Barasertib (AZD1152-HQPA)                    |  |
| Selleck   |       |                                                                                                                          |                 |         |                                              |  |
| Chemicals | S1048 | <chem>c1(Nc2n[nH]c(C)c2)nc(Sc3ccc(NC(C4CC4)=O)cc3)nc(N5CCN(C)CC5)c1</chem>                                               | C23H28N8OS      | 464.586 | VX-680 (Tozasertib, MK-0457)                 |  |
| Selleck   |       |                                                                                                                          |                 |         |                                              |  |
| Chemicals | S1158 | <chem>n1c(c2onc(N3CCC(OC4cc(F)ccc4Br)CC3)c2)nnn1CC(O)=O</chem>                                                           | C17H16BrFN6O4   | 467.249 | MK-8245                                      |  |
| Selleck   |       |                                                                                                                          |                 |         |                                              |  |
| Chemicals | S1064 | <chem>c1(C)ccc(NC(c2ccc(CN3CCN(C)CC3)cc2)=O)cc1Nc4sc(c5cnccc5)n4</chem>                                                  | C28H30N6OS      | 498.642 | Masitinib (AB1010)                           |  |
| Selleck   |       |                                                                                                                          |                 |         |                                              |  |
| Chemicals | S1168 | <chem>CCCC(CCC)C(=O)[O-].[Na+]</chem>                                                                                    | C8H15NaO2       | 166.193 | Valproic acid sodium salt (Sodium valproate) |  |
| Selleck   |       |                                                                                                                          |                 |         |                                              |  |
| Chemicals | S1072 | <chem>n1c(N2CCOCC2)nc(n3c(C(F)F)nc4c3cccc4)nc1N5CCOCC5</chem>                                                            | C19H21F2N7O2    | 417.413 | ZSTK474                                      |  |
| Selleck   |       |                                                                                                                          |                 |         |                                              |  |
| Chemicals | S1177 | <chem>c1cc2c(OC(c3c(N)c(OC)ccc3)=CC2=O)cc1</chem>                                                                        | C16H13NO3       | 267.279 | PD98059                                      |  |
| Selleck   |       |                                                                                                                          |                 |         |                                              |  |
| Chemicals | S1085 | <chem>c1(S(=O)(=O)Nc2cccc2)cc(C=CC(=O)NO)ccc1</chem>                                                                     | C15H14N2O4S     | 318.348 | Belinostat (PXD101)                          |  |
| Selleck   |       |                                                                                                                          |                 |         |                                              |  |
| Chemicals | S1188 | <chem>c1c(Cn2ncnc2)cc(C(C#N)(C)C)cc1C(C#N)(C)C</chem>                                                                    | C17H19N5        | 293.366 | Anastrozole                                  |  |
| Selleck   |       |                                                                                                                          |                 |         |                                              |  |
| Chemicals | S1094 | <chem>c1(cc(Cn2nnc3c2nc(c4cnn(CCO)c4)cn3)cc5)c5nccc1</chem>                                                              | C19H16N8O       | 372.383 | PF-04217903                                  |  |
| Selleck   |       |                                                                                                                          |                 |         |                                              |  |
| Chemicals | S1199 | <chem>n1c(Cl)nc2c(ncn2[C@@H]3O[C@H](CO)[C@@H](O)C3)c1N</chem>                                                            | C10H12ClN5O3    | 285.687 | Cladribine                                   |  |
| Selleck   |       |                                                                                                                          |                 |         |                                              |  |
| Chemicals | S1103 | <chem>O1CCN(CCCOC2cc3c(c(Nc4ccc(NC(c5cccc5)=O)cc4)ncn3)cc2OC)CC1</chem>                                                  | C29H31N5O4      | 513.588 | ZM 447439                                    |  |
| Selleck   |       | <chem>c1c(OC)c2c(C(=O)c3c(c(O)c4c(C[C@]([O])(C(=O)CO)C[C@H]4O[C@]5([</chem>                                              |                 |         |                                              |  |
| Chemicals | S1208 | <chem>[H])O)[C@@H](C)[C@@H](O)[C@@H](N)C5)c3O)C2=O)c1.Cl</chem>                                                          | C27H30ClNO11    | 579.98  | Doxorubicin (Adriamycin)                     |  |



|           |       |                                                                       |                 |         |                        |
|-----------|-------|-----------------------------------------------------------------------|-----------------|---------|------------------------|
| Selleck   |       |                                                                       |                 |         |                        |
| Chemicals | S1221 | c1[nH]c(N=NN(C)C)c(C(N)=O)n1                                          | C6H10N6O        | 182.183 | Dacarbazine            |
| Selleck   |       | n1c(N)c2c(n(C[C@@H](C)OCP(=O)OCOC(O(C)C)=O)OCOC(=O)OC(C               |                 |         | Tenofovir Disoproxil   |
| Chemicals | S1400 | )C)n2)nc1.C(C(O)=O)=CC(O)=O                                           | C23H34N5O14P    | 635.515 | Fumarate               |
| Selleck   |       | c1(O C)cc2c(C[C@]3([H])[C@@]2([H])CC[C@@]4(C)[C@@]3([H])CC[C          |                 |         | 2-Methoxyestradiol (2- |
| Chemicals | S1233 | @H]4O)cc1O                                                            | C19H26O3        | 302.408 | MeOE2)                 |
| Selleck   |       |                                                                       |                 |         |                        |
| Chemicals | S1422 | c1cc(OCCCC(=O)NO)c(C)cc1Cl                                            | C11H14ClNO3     | 243.687 | Droxinostat            |
| Selleck   |       |                                                                       |                 |         |                        |
| Chemicals | S1249 | c1(S(=O)(=O)N)ccc(Nc2nn(C(=O)c3c(F)cccc3F)c(N)n2)cc1                  | C15H12F2N6O3S   | 394.356 | JNJ-7706621            |
| Selleck   |       |                                                                       |                 |         |                        |
| Chemicals | S1443 | c1cc2c(cc(C(C)N(C(=O)N)O)s2)cc1                                       | C11H12N2O2S     | 236.29  | Zileuton               |
| Selleck   |       | c1(CN(S(=O)(=O)c2ccc(Cl)cc2)[C@H](CCCF(F)F)C(=O)N)ccc(c3nocn3)c       |                 |         | Avagacestat (BMS-      |
| Chemicals | S1262 | c1F                                                                   | C20H17ClF4N4O4S | 520.885 | 708163)                |
| Selleck   |       | O(C)C(=O)N[C@@H](C(C)(C)C)C(=O)N[C@@H](Cc1ccccc1)[C@@H](O)            |                 |         |                        |
| Chemicals | S1457 | CN(Cc2ccc(c3cccn3)cc2)NC(=O)[C@H](C(C)(C)C)NC(=O)O.C.S(O)(O)(=        | C38H54N6O11S    | 802.934 | Atazanavir Sulfate     |
| Selleck   |       | O)=O                                                                  |                 |         |                        |
| Chemicals | S1282 | [C@@](C)(O O1)(CC2)O[C@@]([H])(O C(=O)[C@H]3C)[C@]1([C@@]3([          | C15H22O5        | 282.332 | Artemisinin            |
| Selleck   |       | H])CC[C@@H]4C)[C@@]24[H]                                              |                 |         | TSU-68 (SU6668,        |
| Chemicals | S1470 | c1cc2c(NC(=O)C2=Cc3c(C)c(CCC(=O)O)c(C)[nH]3)cc1                       | C18H18N2O3      | 310.347 | Orantinib)             |
| Selleck   |       |                                                                       |                 |         |                        |
| Chemicals | S1294 | C1Cc2c(ccc(OCCCCc3nnnn3C4CCCCC4)c2)NC1=O                              | C20H27N5O2      | 369.461 | Cilostazol             |
| Selleck   |       |                                                                       |                 |         |                        |
| Chemicals | S1483 | c1(O C)cc(C(=O)C)ccc1OCCCN2CCC(c3c4c(cc(F)cc4)n3)CC2                  | C24H27FN2O4     | 426.481 | lloperidone            |
| Selleck   |       | c1(nc(N2CCN(C(=O)C3Oc4c(cccc4)OC3)CC2)nc5N)c5cc(O C)c(O C)c1.S(C)     |                 |         |                        |
| Chemicals | S1324 | (=O)(O)=O                                                             | C24H29N5O8S     | 547.581 | Doxazosin Mesylate     |
| Selleck   |       | CC(C)(C)c1[nH]c(c2ccc3c(n(CC(C)(C)C)c(N)n3)n2)c(c4ccc(F)cc4)n1.CS(O)( |                 |         |                        |
| Chemicals | S1494 | =O)=O.CS(O)(=O)=O                                                     | C26H37FN6O6S2   | 612.737 | LY2228820              |
| Selleck   |       |                                                                       |                 |         |                        |
| Chemicals | S1354 | c1cc2c([nH]c(S(=O)Cc3c(C)c(OCC(F)F)F)ccn3)n2)cc1                      | C16H14F3N3O2S   | 369.361 | Lansoprazole           |
| Selleck   |       | N1(O)C(=O)[C@]2([H])N([C@H](c3cc4c(O CO4)cc3)c5c(c6c(cccc6)[nH]5)C    |                 |         |                        |
| Chemicals | S1512 | 2)C(=O)C1                                                             | C22H19N3O4      | 389.404 | Tadalafil              |
| Selleck   |       |                                                                       |                 |         |                        |
| Chemicals | S1368 | c1c(C)c(C(=CC(C)=CC=CC(C)=CC(=O)O)c(C)c(C)c1O C                       | C21H26O3        | 326.429 | Acitretin              |
| Selleck   |       | c1cc(c2cn3c(sc4c3ccc(OCCN5CCOCC5)c4)n2)ccc1NC(=O)Nc6noc(C(C)(C)       |                 |         |                        |
| Chemicals | S1526 | C)c6                                                                  | C29H32N6O4S     | 560.667 | Quizartinib (AC220)    |
| Selleck   |       | c1(C(Oc2ccc3c(c(ccc(C(N)=N)c3)c2)=O)ccc(NC(N)=N)cc1.S(=O)(=O)(C)O.    |                 |         |                        |
| Chemicals | S1386 | S(=O)(=O)(C)O                                                         | C21H25N5O8S2    | 539.582 | Nafamostat Mesylate    |
| Selleck   |       |                                                                       |                 |         |                        |
| Chemicals | S1537 | c(C(=O)c1c(c(C)c(C)cc1)O2)(cccc3CC(=O)O)c23                           | C17H14O4        | 282.291 | DMXAA (Vadimezan)      |
| Selleck   |       |                                                                       |                 |         |                        |
| Chemicals | S1006 | c1c(O C2CCOCC2)c3c(ncnc3Nc4c5c(O CO5)ccc4Cl)cc1OCCN6CCN(C)CC6         | C27H32ClN5O5    | 542.026 | Saracatinib (AZD0530)  |
| Selleck   |       |                                                                       |                 |         |                        |
| Chemicals | S1113 | c(nc1c1nonc1N)n2CC)(c(C#CC(C)(O)C)nc3O C[C@H]4CCNC4)c23               | C21H27N7O3      | 425.484 | GSK690693              |
| Selleck   |       |                                                                       |                 |         |                        |
| Chemicals | S1021 | n1c(Nc2sc(C(=O)Nc3c(C)cccc3Cl)n2)cc(N4CCN(CCO)CC4)nc1C                | C22H26ClN7O2S   | 488.006 | Dasatinib              |
| Selleck   |       |                                                                       |                 |         | Mocetinostat           |
| Chemicals | S1122 | C(Nc1ccccc1N)(=O)c2ccc(CNc3nccc(c4ccnc4)n3)cc2                        | C23H20N6O       | 396.444 | (MGCD0103)             |
| Selleck   |       | c1c(CNc2ncccc2C(Nc3cc4c(C(C)CN4)cc3)=O)ccnc1.P(O)(O)(=O)O.P(          |                 |         | Motesanib Diphosphate  |
| Chemicals | S1032 | O)(O)(=O)O                                                            | C22H29N5O9P2    | 569.441 | (AMG-706)              |
| Selleck   |       |                                                                       |                 |         |                        |
| Chemicals | S1139 | c1c(O)c2c(O C3(CCNCC3)C=C2c4ccc(C(N(CC)CC)=O)cc4)cc1.Cl               | C24H29ClN2O3    | 428.952 | ADL5859 HCl            |
| Selleck   |       |                                                                       |                 |         |                        |
| Chemicals | S1041 | n1ccc(c2nc(Nc3cc(C)ccc3)sc2)cc1                                       | C15H13N3S       | 267.349 | STF-62247              |
| Selleck   |       | c1cc(C(N[C@@H](c2ccccc2)[C@@H](O)C(=O)O)[C@@H]3C(C)=C4C(C)(           |                 |         |                        |
| Chemicals | S1150 | C)[C@](O)([C@@H](O C(=O)c5ccccc5)C6[C@@]([C@H](O)C[C@@H]              | C47H51NO14      | 853.906 | Paclitaxel             |
| Selleck   |       | 7[C@@]6(O C(=O)C)CO7)C(=O)[C@@H]4O C(=O)C(C3)=O)ccc1                  |                 |         |                        |
| Chemicals | S1049 | [C@@H]1(C(Nc2ccnc2)=O)CC[C@@H]([C@H](N)C)CC1.Cl.Cl                    | C14H23Cl2N3O    | 320.258 | Y-27632 2HCl           |
| Selleck   |       |                                                                       |                 |         |                        |
| Chemicals | S1159 | N1=C(c2cc(C(C)C)c(O)cc2O)N(c3ccc(c4c3)n(C)cc4)C(=O)N1                 | C20H20N4O3      | 364.398 | Ganetespib (STA-9090)  |
| Selleck   |       | c1(c2nc3c(sc(CN4CCN(S(C)(=O)=O)CC4)c3)c(N5CCOCC5)n2)c6c([nH]nc6)      |                 |         |                        |
| Chemicals | S1065 | ccc1                                                                  | C23H27N7O3S2    | 513.636 | GDC-0941               |
| Selleck   |       |                                                                       |                 |         |                        |
| Chemicals | S1169 | C(N1C(=NC(N2CCOCC2)=CC1=O)C(C(Nc3ccccc3)C)=C4)=C4C                    | C21H24N4O2      | 364.441 | TGX-221                |
| Selleck   |       |                                                                       |                 |         |                        |
| Chemicals | S1075 | c1c2c(c(C(C(=O)NC3=O)=C3c4c(Cl)cc(Cl)cc4)cn2C)ccc1                    | C19H12Cl2N2O2   | 371.217 | SB216763               |

|           |       |                                                                                                                                                                                                                                                    |                |          |                                      |
|-----------|-------|----------------------------------------------------------------------------------------------------------------------------------------------------------------------------------------------------------------------------------------------------|----------------|----------|--------------------------------------|
| Selleck   |       |                                                                                                                                                                                                                                                    |                |          | Regorafenib (BAY 73-                 |
| Chemicals | S1178 | <chem>c1cc(Oc2ccc(NC(=O)Nc3cc(C(F)(F)F)c(Cl)cc3)c(F)c2)cc(C(NC)=O)n1</chem>                                                                                                                                                                        | C21H15ClF4N4O3 | 482.815  | 4506)                                |
| Selleck   |       |                                                                                                                                                                                                                                                    |                |          |                                      |
| Chemicals | S1087 | <chem>c1c(C(=O)N)cc([N+][I-])=O)c(1)c1</chem>                                                                                                                                                                                                      | C7H5IN2O3      | 292.031  | Iniparib (BSI-201)                   |
| Selleck   |       |                                                                                                                                                                                                                                                    |                |          |                                      |
| Chemicals | S1190 | <chem>C(Nc1ccc(C#N)c(C(F)(F)F)c1)(=O)C(O)(C)CS(c2ccc(F)cc2)(=O)=O</chem>                                                                                                                                                                           | C18H14F4N2O4S  | 430.373  | Bicalutamide                         |
| Selleck   |       |                                                                                                                                                                                                                                                    |                |          |                                      |
| Chemicals | S1095 | <chem>c1(C=CC(=O)NO)ccc(CN(CCc2c3c(ccc3)[nH]c2)CCO)cc1</chem>                                                                                                                                                                                      | C22H25N3O3     | 379.452  | LAQ824 (Dacinostat)                  |
| Selleck   |       |                                                                                                                                                                                                                                                    |                |          |                                      |
| Chemicals | S1200 | <chem>[C@H]1(N2C(=O)N=C(N)N=C2)C[C@H](O)[C@@H](CO)O1</chem>                                                                                                                                                                                        | C8H12N4O4      | 228.205  | Decitabine                           |
| Selleck   |       |                                                                                                                                                                                                                                                    |                |          |                                      |
| Chemicals | S1104 | <chem>C(O)Cn1cc(c2cc3c(C(=NO)CC3)cc2)c(c4cncnc4)n1</chem>                                                                                                                                                                                          | C19H18N4O2     | 334.372  | GDC-0879                             |
| Selleck   |       |                                                                                                                                                                                                                                                    |                |          | Fluorouracil (5-Fluoracil, 5-        |
| Chemicals | S1209 | <chem>C1(=O)NC=C(F)C(=O)N1</chem>                                                                                                                                                                                                                  | C4H3FN2O2      | 130.077  | FU)                                  |
| Selleck   |       |                                                                                                                                                                                                                                                    |                |          | Dexrazoxane HCl (ICRF-               |
| Chemicals | S1222 | <chem>N1C(=O)CN(C[C@H](C)N2CC(=O)NC(=O)C2)CC1=O.Cl</chem>                                                                                                                                                                                          | C11H17ClN4O4   | 304.73   | 187, ADR-529)                        |
| Selleck   |       | <chem>c1(N(C)C)c2c(C(=O)C(=C3O)[C@]([H])(C)[C@]4([H])(C@@)3(O)C(=O)C(C(N)=O)=C(O)[C@@H]4N(C)C)C2)c(O)c(NC(=O)CNC(C)(C)C)c1</chem>                                                                                                                  | C29H39N5O8     | 585.649  | Tigecycline                          |
| Chemicals | S1403 |                                                                                                                                                                                                                                                    |                |          |                                      |
| Selleck   |       |                                                                                                                                                                                                                                                    |                |          |                                      |
| Chemicals | S1234 | <chem>C(#N)C(=Cc1cc(C(C)(C)C)c(O)c(Br)c1)C#N</chem>                                                                                                                                                                                                | C14H13BrN2O    | 305.17   | AG-1024                              |
| Selleck   |       |                                                                                                                                                                                                                                                    |                |          |                                      |
| Chemicals | S1425 | <chem>c1ccc(C)c(NC(CN2CCN(CC(COc3c(OC)cccc3)O)CC2)=O)c1C.Cl.Cl</chem>                                                                                                                                                                              | C24H35Cl2N3O4  | 500.458  | Ranolazine 2HCl                      |
| Selleck   |       |                                                                                                                                                                                                                                                    |                |          |                                      |
| Chemicals | S1250 | <chem>c1(F)cc(N2C(C)(C)C(=O)N(c3cc(C(F)(F)F)c(C#N)cc3)C2=S)ccc1C(=O)NC</chem>                                                                                                                                                                      | C21H16F4N4O2S  | 464.436  | Enzalutamide (MDV3100)               |
|           |       | <chem>[O-]C(=O)[C@@H](C)C[C@H](C(=O)C(C)=C[C@H](C)[C@]1([H])[C@@H](C[C@@H](O)C[C@@]2(O)[C@](C)([C@@]3([H])C[C@H](OC4CC[C@H](OC)[C@@H](C)O4)[C@@H](C)[C@@]5(O)[C@]([H])([C@]6([H])[C@H](C)C[C@@H](C)[C@](O)(CO)O6)C[C@H]5C)O3)CC2)O1)C.[Na+]</chem> | C47H77NaO14    | 889.096  | Nanchangmycin                        |
| Selleck   | S1450 |                                                                                                                                                                                                                                                    |                |          |                                      |
| Chemicals | S1264 | <chem>n1cc2c(nc(NC(=O)NC(C)(C)C)c(c3cc(OC)cc(OC)c3)c2)nc1NCCCCN(CC)CC</chem>                                                                                                                                                                       | C28H41N7O3     | 523.67   | PD173074                             |
| Selleck   |       |                                                                                                                                                                                                                                                    |                |          |                                      |
| Chemicals | S1458 | <chem>c1c(F)c(SC2=NN3C(=C(c4c(Cl)cccc4Cl)C(=O)N=C3)C=C2)ccc1F</chem>                                                                                                                                                                               | C19H9Cl2F2N3OS | 436.262  | VX-745                               |
| Selleck   |       | <chem>c(cccc1)(Oc2c(cc(Cl)cc2)[C@]3([H])[C@]4([H])CN(C)C3)c14.C(O)(=O)C=CC(O)=O</chem>                                                                                                                                                             | C21H20ClNO5    | 401.84   | Asenapine                            |
| Chemicals | S1283 |                                                                                                                                                                                                                                                    |                |          |                                      |
| Selleck   |       |                                                                                                                                                                                                                                                    |                |          |                                      |
| Chemicals | S1472 | <chem>c1(F)cc(COc2ccc(CN[C@@H](C)C(=O)N)cc2)ccc1.CS(O)(=O)=O</chem>                                                                                                                                                                                | C18H23FN2O5S   | 398.449  | Safinamide Mesylate                  |
| Selleck   |       | <chem>O1[C@H]([C@H]12)C[C@H](C(=Cc3ccc(C)n3)C)O[C@]([H])(O)C(C)(C)C(=O)[C@H](C)[C@@H](O)[C@H](C)CCC2</chem>                                                                                                                                        | C26H39NO6S     | 493.656  | Epothilone A                         |
| Chemicals | S1297 |                                                                                                                                                                                                                                                    |                |          |                                      |
| Selleck   |       |                                                                                                                                                                                                                                                    |                |          |                                      |
| Chemicals | S1484 | <chem>c1cc(C(=O)C=Cc2cc(C=CC(=O)NO)n(C)c2)cc(F)c1</chem>                                                                                                                                                                                           | C17H15FN2O3    | 314.311  | MC1568                               |
| Selleck   |       |                                                                                                                                                                                                                                                    |                |          |                                      |
| Chemicals | S1326 | <chem>C1(C)=NN(c2ccccc2)C(=O)C1</chem>                                                                                                                                                                                                             | C10H10N2O      | 174.199  | Edaravone                            |
| Selleck   |       | <chem>n1c(N)c2c(cc(C(C#C)c3ccc(C(=O)N[C@H](C(O)=O)CCC(=O)O)cc3)n2)nc1N</chem>                                                                                                                                                                      | C23H23N7O5     | 477.473  | Pralatrexate                         |
| Chemicals | S1497 |                                                                                                                                                                                                                                                    |                |          |                                      |
| Selleck   |       |                                                                                                                                                                                                                                                    |                |          |                                      |
| Chemicals | S1358 | <chem>C1C(=C2c3c(cc(Cl)cc3)CCc4c2cccc4)CCN(C(OC)=O)C1</chem>                                                                                                                                                                                       | C22H23ClN2O2   | 382.883  | Loratadine                           |
| Selleck   |       | <chem>C1(CC(C)C)C(=O)N(C)C(CC(C)C)C(=O)N(C)C(C(C)C)C(=O)N(C)C([C@H](O)[C@H](C)CC=CC)C(=O)N(C)C(C)C(=O)N(C)C(C)C(=O)N(C)C(C)C(=O)N1C</chem>                                                                                                         | C62H111N11O12  | 1202.611 | Cyclosporine                         |
| Chemicals | S1514 |                                                                                                                                                                                                                                                    |                |          |                                      |
| Selleck   |       | <chem>C1C[C@@]2([H])C(C[C@]3([H])[C@@]2([H])CC[C@@]4(CC)[C@@]3([H])C=C[C@@]4(C#C)O)=CC1=O</chem>                                                                                                                                                   | C21H26O2       | 310.43   | Gestodene                            |
| Chemicals | S1376 |                                                                                                                                                                                                                                                    |                |          |                                      |
| Selleck   |       |                                                                                                                                                                                                                                                    |                |          |                                      |
| Chemicals | S1528 | <chem>c1ncc(c2cc([C@]3(C)CCSC(N)=N3)c(F)cc2F)cn1</chem>                                                                                                                                                                                            | C15H14F2N4S    | 320.36   | LY2811376                            |
| Selleck   |       |                                                                                                                                                                                                                                                    |                |          |                                      |
| Chemicals | S1387 | <chem>c1(OCC(O)CN2CCN(c3c(OC)cccc3)CC2)cccc4c1cccc4.Cl.Cl</chem>                                                                                                                                                                                   | C24H30Cl2N2O3  | 465.413  | Naftopidil DiHCl                     |
| Selleck   |       | <chem>[C@@]([H])(CCC1)([C@H](C(N[C@H](C(CNC2CC2)=O)=O)CCC)=O)N(C([C@@H](N([C@H](C3CCCCC3)NC(c4cncnc4)=O)=O)C(C)(C)C(=O)C5)[C@@]15[H])</chem>                                                                                                       | C36H53N7O6     | 679.849  | Telaprevir (VX-950)                  |
| Chemicals | S1538 |                                                                                                                                                                                                                                                    |                |          |                                      |
| Selleck   |       |                                                                                                                                                                                                                                                    |                |          |                                      |
| Chemicals | S1007 | <chem>c(ccc(Oc1ccccc1)c2)(c(O)c(C(=O)NCC(=O)O)nc3C)c23</chem>                                                                                                                                                                                      | C19H16N2O5     | 352.341  | FG-4592                              |
| Selleck   |       |                                                                                                                                                                                                                                                    |                |          |                                      |
| Chemicals | S1114 | <chem>n1c2c(cc(C(F)(F)F)c3nnc4n3nc(c5cn(C)nc5)cc4)cc2)ccc1</chem>                                                                                                                                                                                  | C19H13F2N7     | 377.35   | JNJ-38877605                         |
| Selleck   |       | <chem>[C@H]1(OC)[C@@H](OP(C)(=O)C)CC[C@@H](C[C@@H](C)[C@H]2OC(=O)[C@@]3([H])N(CCCC3)C(=O)C(=O)[C@](O)(O)[C@@]4([H])C[C@H](OC)C(C)=CC=CC=C[C@H](C)[C@@H](C)C(=O)[C@H](OC)[C@H](O)C(C)=C[C@H](C)C(=O)C2)[C@H](C)CC4)C1</chem>                        | C53H84NO14P    | 990.206  | Ridafolorimus (Defolorimus, MK-8669) |
| Chemicals | S1022 |                                                                                                                                                                                                                                                    |                |          |                                      |

|           |       |                                                                                                                                  |                 |         |                           |
|-----------|-------|----------------------------------------------------------------------------------------------------------------------------------|-----------------|---------|---------------------------|
| Selleck   |       | <chem>c(ccc1)(c(Nc2n[nH]c(C3CC3)c2)nc(N4[C@](C(Nc5cnc(F)cc5)=O)(C)CCC4)n6)n16</chem>                                             | C23H24FN9O      | 461.495 | BMS-754807                |
| Chemicals | S1124 |                                                                                                                                  |                 |         |                           |
| Selleck   |       | <chem>c1(C(Nc2cc(n3cnc(C)c3)cc(C(F)(F)F)c2)=O)cc(Nc4nc(c5ccccc5)ccn4)c(C)c c1</chem>                                             | C28H22F3N7O     | 529.516 | Nilotinib (AMN-107)       |
| Chemicals | S1033 |                                                                                                                                  |                 |         |                           |
| Selleck   |       | <chem>C(Nc1ccc([N+])([O-])=O)c(C(F)(F)F)c1(=O)[C@](O)(C)COc2ccc(NC(C)=O)cc2</chem>                                               | C19H18F3N3O6    | 441.358 | Andarine                  |
| Chemicals | S1140 |                                                                                                                                  |                 |         |                           |
| Selleck   |       | <chem>c1(F)cc2c(NC(=O)C2=Cc3c(C)c(C(=O)NCCN(CC)CC)c(C)[nH]3)cc1.C(=O)(O)C[C@H](O)C(=O)O</chem>                                   | C26H33FN4O7     | 532.561 | Sunitinib Malate          |
| Chemicals | S1042 |                                                                                                                                  |                 |         |                           |
| Selleck   |       | <chem>c1(Cl)cc2c([nH]cc2C(c3c(F)ccc(NS(CCC)(=O)=O)c3F)=O)nc1</chem>                                                              | C17H14ClF2N3O3S | 413.826 | PLX-4720                  |
| Chemicals | S1152 |                                                                                                                                  |                 |         |                           |
| Selleck   |       | <chem>c1ccc(C(=S)N(C)NC(=O)CC(=O)NN(C(c2ccccc2)=S)C)cc1</chem>                                                                   | C19H20N4O2S2    | 400.518 | Elesclomol (STA-4783)     |
| Chemicals | S1052 |                                                                                                                                  |                 |         |                           |
| Selleck   |       | <chem>O1C[C@@H](OCc2ccc(OC(F)(F)F)cc2)Cn3c1nc([N+])([O-])=O)c3</chem>                                                            | C14H12F3N3O5    | 359.257 | PA-824                    |
| Chemicals | S1162 |                                                                                                                                  |                 |         |                           |
| Selleck   |       | <chem>c1c(C(F)(F)F)c(C(C#N)=C(N)Sc2ccc(N)cc2)ccc1</chem>                                                                         | C16H12F3N3S     | 335.347 | SL-327                    |
| Chemicals | S1066 |                                                                                                                                  |                 |         |                           |
| Selleck   |       | <chem>c1(N2CCN(C)CC2)ccc(Nc3nc(OC4cccc(NC(=O)C=C)c4)c(Cl)cn3)cc1</chem>                                                          | C24H25ClN6O2    | 464.947 | WZ3146                    |
| Chemicals | S1170 |                                                                                                                                  |                 |         |                           |
| Selleck   |       | <chem>n1ccc(c2[nH]c(c3ccc(S(=O)C)cc3)nc2c4ccc(F)cc4)cc1</chem>                                                                   | C21H16FN3OS     | 377.435 | SB203580                  |
| Chemicals | S1076 |                                                                                                                                  |                 |         |                           |
| Selleck   |       | <chem>c1(N2CCN(C)CC2)ccc(Nc3nc(Sc4cccc(NC(=O)C=C)c4)c(Cl)cn3)cc1</chem>                                                          | C24H25ClN6OS    | 481.013 | WZ8040                    |
| Chemicals | S1179 |                                                                                                                                  |                 |         |                           |
| Selleck   |       | <chem>c(c(c1cccc(OCc2ccccc2)c1)cn3[C@H]4[C@H](CN5CCCC5)C4)(c(N)ncn6)c36</chem>                                                   | C28H31N5O       | 453.579 | NVP-ADW742                |
| Chemicals | S1088 |                                                                                                                                  |                 |         |                           |
| Selleck   |       | <chem>c1(O)cc(c2cc1)C[C@@H](CCCCCCCCC(CCCC(F)(F)F)(F)F)=O)[C@]([H])([C@]23[H])([C@]23[H])([H])([H])([C@]4(C)CC3)CC[C@H]4O</chem> | C32H47F5O3S     | 606.771 | Fulvestrant               |
| Chemicals | S1191 |                                                                                                                                  |                 |         | Quisinstat (JNJ-26481585) |
| Selleck   |       | <chem>c1cc2c(n(C)cc2CNCC3CCN(c4ncc(C(NO)=O)cn4)CC3)cc1</chem>                                                                    | C21H26N6O2      | 394.47  |                           |
| Chemicals | S1096 |                                                                                                                                  |                 |         |                           |
| Selleck   |       | <chem>S(=O)(=O)([O-])CCSSCCS(=O)(=O)[O-].[Na+].[Na+]</chem>                                                                      | C4H8Na2O6S4     | 326.342 | Dimesna                   |
| Chemicals | S1201 |                                                                                                                                  |                 |         |                           |
| Selleck   |       | <chem>c1cc2c(OC(N3CCOCC3)=CC2=O)c(c4ccccc4)c1</chem>                                                                             | C19H17NO3       | 307.343 | LY294002                  |
| Chemicals | S1105 |                                                                                                                                  |                 |         |                           |
| Selleck   |       | <chem>n1c(N)c2c(ncc(CN(C)c3ccc(C(=O)N[C@H](C(O)=O)CCC(O)=O)cc3)n2)nc1N</chem>                                                    | C20H22N8O5      | 454.439 | Methotrexate              |
| Chemicals | S1210 |                                                                                                                                  |                 |         |                           |
| Selleck   |       | <chem>[Pt+2].[O-]C(=O)C(=O)[O-].C1C[C@H](N)[C@H](N)CC1</chem>                                                                    | C8H14N2O4Pt     | 397.286 | Oxaliplatin               |
| Chemicals | S1224 |                                                                                                                                  |                 |         |                           |
| Selleck   |       | <chem>C(C#N)(C[C@@]1(C)[C@@]2CC[C@]3([H])([C@@]1([H])CC[C@@]4(C)[C@@]3([H])CC[C@H]4O)[C@]5([H])O2)=C5O</chem>                    | C20H27NO3       | 329.433 | Trilostane                |
| Chemicals | S1404 |                                                                                                                                  |                 |         |                           |
| Selleck   |       | <chem>N1(C)C(=O)n2c(c(C(=O)N)nc2)N=N1</chem>                                                                                     | C6H6N6O2        | 194.151 | Temozolomide              |
| Chemicals | S1237 |                                                                                                                                  |                 |         |                           |
| Selleck   |       | <chem>c1(OC)cc(CC(=O)N[C@H](CC(C)C)c2c(N3CCCC3)cccc2)ccc1C(=O)O</chem>                                                           | C27H36N2O4      | 452.586 | Repaglinide               |
| Chemicals | S1426 |                                                                                                                                  |                 |         |                           |
| Selleck   |       | <chem>C1(=O)C=C(C=C2[C@]3([H])([C@@]([H])([C@@]4(C)CC2)CC[C@]4(CC#N)O)CC1)CC3</chem>                                             | C20H25NO2       | 311.418 | Dienogest                 |
| Chemicals | S1251 |                                                                                                                                  |                 |         |                           |
| Selleck   |       | <chem>n1c(Nc2ccc(CC(=O)N3CCN(CC)CC3)cc2)nc(Nc4ccc(C(=O)Nc5c(Cl)cccc5)c c4)c(F)c1</chem>                                          | C31H31ClFN7O2   | 588.075 | Aurora A Inhibitor I      |
| Chemicals | S1451 |                                                                                                                                  |                 |         |                           |
| Selleck   |       | <chem>c1cc(c2nc(N3CCOCC3)c4c(n(C5CCN(C(O)C)=O)CC5)nc4)n2)ccc1NC(=O)OC</chem>                                                     | C24H29N7O5      | 495.531 | WYE-354                   |
| Chemicals | S1266 |                                                                                                                                  |                 |         |                           |
| Selleck   |       | <chem>c1(Nc2ncnc2)nc(C(=O)NCc3ccccc3)cs1</chem>                                                                                  | C15H13N5OS      | 311.362 | Thiazovivin               |
| Chemicals | S1459 |                                                                                                                                  |                 |         |                           |
| Selleck   |       | <chem>c1cccc(C(O)(C2C(CC3C2)C=C3)CCN4CCCC4)c1.Cl</chem>                                                                          | C21H30ClNO      | 347.922 | Biperiden HCl             |
| Chemicals | S1285 |                                                                                                                                  |                 |         |                           |
| Selleck   |       | <chem>C1(=O)NC(C)=C(C(=O)Nc2cc3c([nH]nc3)cc2F)C(c4ccc(C(F)(F)F)cc4)C1</chem>                                                     | C21H16F4N4O2    | 432.371 | GSK429286A                |
| Chemicals | S1474 |                                                                                                                                  |                 |         |                           |
| Selleck   |       | <chem>O1[C@H](N2C(=O)NC(=O)C(F)=C2)C[C@H](O)[C@H]1CO</chem>                                                                      | C9H11FN2O5      | 246.192 | Floxuridine               |
| Chemicals | S1299 |                                                                                                                                  |                 |         |                           |
| Selleck   |       | <chem>c1c(N(C(=O)C)S(=O)(=O)c2ccc(OC)cc2)c(C=Cc3cc[n+](([O-])cc3)ccc1</chem>                                                     | C22H20N2O5S     | 424.47  | HMN-214                   |
| Chemicals | S1485 |                                                                                                                                  |                 |         |                           |
| Selleck   |       | <chem>n1(C(c2ccccc2)C)cncc1C(=O)OCC</chem>                                                                                       | C14H16N2O2      | 244.289 | Etomidate                 |
| Chemicals | S1329 |                                                                                                                                  |                 |         |                           |
| Selleck   |       | <chem>C1=C[C@@]2(C)C(CC[C@]3([H])([C@@]2F)[C@H](O)C[C@@]4(C)[C@ @]3([H])C[C@H](C)[C@@]4(O)C(=O)C)=CC1=O</chem>                   | C22H29FO5       | 392.461 | Betamethasone             |
| Chemicals | S1500 |                                                                                                                                  |                 |         |                           |
| Selleck   |       | <chem>c1(C=C2SC(=O)NC2=O)cc3c(nc3c4ccncc4)cc1</chem>                                                                             | C18H11N3O2S     | 333.364 | GSK1059615                |
| Chemicals | S1360 |                                                                                                                                  |                 |         |                           |
| Selleck   |       | <chem>c1(C=CC(=O)NO)cc2c(n(CCN(CC)CC)c(CCCC)n2)cc1</chem>                                                                        | C20H30N4O2      | 358.478 | Pracinostat (SB939)       |
| Chemicals | S1515 |                                                                                                                                  |                 |         |                           |

|           |       |                                                                                                                                                                                                     |                 |         |                                    |
|-----------|-------|-----------------------------------------------------------------------------------------------------------------------------------------------------------------------------------------------------|-----------------|---------|------------------------------------|
| Selleck   |       | <chem>C1C[C@@]2(C)C([C@@]3([H])([C@]([H])(C3)[C@]4([H])(C@@]2([H])CC[C@@]5(C)[C@@]4([H])(C@@]6([H])(C@]([H])(C6)[C@]57CCC(=O)O)7)=CC1=O</chem>                                                      | C24H30O3        | 366.493 | Drosiprenone                       |
| Chemicals | S1377 |                                                                                                                                                                                                     |                 |         |                                    |
| Selleck   |       | <chem>c1(NS(=O)(=O)CC)cc2c(NC(=O)C2=Nc3ccc(CN4CCCC4)cc3)c5cccc5</chem>                                                                                                                              | C29H32N4O3S     | 516.654 | Hesperadin                         |
| Chemicals | S1529 |                                                                                                                                                                                                     |                 |         |                                    |
| Selleck   |       |                                                                                                                                                                                                     |                 |         |                                    |
| Chemicals | S1390 | <chem>c1cc2c(n(C)c3c2C(=O)C(Cn4ccnc4C)CC3)cc1.Cl</chem>                                                                                                                                             | C18H20ClN3O     | 329.824 | Ondansetron HCl                    |
| Selleck   |       | <chem>C1C(CC(CC2([C@H](N)C(=O)N3[C@@]4([H])(C@]([H])(C4)C[C@H]3C#N)C5)(O)CC15)C2</chem>                                                                                                             | C18H25N3O2      | 315.41  | Saxagliptin                        |
| Chemicals | S1540 |                                                                                                                                                                                                     |                 |         |                                    |
| Selleck   |       |                                                                                                                                                                                                     |                 |         |                                    |
| Chemicals | S1008 | <chem>c1c(C(=O)NOCOC)c(Nc2c(Cl)cc(Br)cc2)c(F)c3c1n(C)cn3</chem>                                                                                                                                     | C17H15BrClFN4O3 | 457.681 | Selumetinib (AZD6244)              |
| Selleck   |       | <chem>c1cc(c2ccc([C@@H](C(F)(F)F)N[C@@H](CC(F)(C)C(CNC3(CC3)C#N)=O)cc2)ccc1S(C)=O</chem>                                                                                                            | C25H27F4N3O3S   | 525.559 | Odanacatib (MK-0822)               |
| Chemicals | S1115 |                                                                                                                                                                                                     |                 |         |                                    |
| Selleck   |       |                                                                                                                                                                                                     |                 |         |                                    |
| Chemicals | S1023 | <chem>c1(N[C](C)(c2c(cc(OCOC)c(OCOC)c2)N=C3=N3)cc(C#C)ccc1.Cl</chem>                                                                                                                                | C23H27ClN3O4    | 444.931 | Erlotinib HCl (OSI-744)            |
| Chemicals | S1129 |                                                                                                                                                                                                     |                 |         |                                    |
| Selleck   |       | <chem>n1c(c2ncc1C(Nc3cccc3c4cn(c5n4)c(CN6CCNCC6)cs5)=O)cccc2.Cl</chem>                                                                                                                              | C25H24ClN7O5    | 506.022 | SRT1720                            |
| Chemicals | S1034 | <chem>c1cc(Oc2ccccc2)cc(c3c4c(ncn4N)([C@H]5C[C@@H](CN6CCC6)C5)c3)c1</chem>                                                                                                                          | C27H29N5O       | 439.552 | NVP-AEW541                         |
| Selleck   |       | <chem>C(NCC=C)(C1=O)=C(C[C@@H](C)(C)[C@H](O)(C)[C@H](O)[C@@H](C)C=C(C)[C@H](O)(C)N)=O)[C@@H](O)C=C(C)C(=O)N2C(=O)C2=C1</chem>                                                                       | C31H43N3O8      | 585.688 | 17-AAG (Tanespimycin)              |
| Chemicals | S1141 |                                                                                                                                                                                                     |                 |         |                                    |
| Selleck   |       | <chem>c1c2c(c(N3CCN(C(=O)Nc4ccc(OC(C)C)cc4)CC3)ncn2)cc(O)c1OCCCN5CCCC5</chem>                                                                                                                       | C31H42N6O4      | 562.703 | Tandutinib (MLN518)                |
| Chemicals | S1043 |                                                                                                                                                                                                     |                 |         |                                    |
| Selleck   |       |                                                                                                                                                                                                     |                 |         |                                    |
| Chemicals | S1153 | <chem>n1c(N[C@H](CC)CO)nc(NCc2cccc2)c3c1n(C(C)C)cn3</chem>                                                                                                                                          | C19H26N6O       | 354.449 | Roscovitine (Seliciclib, CYC202)   |
| Selleck   |       |                                                                                                                                                                                                     |                 |         |                                    |
| Chemicals | S1053 | <chem>c1cc(C(=O)Nc2c(N)cccc2)ccc1CNC(=O)OCc3ccccc3</chem>                                                                                                                                           | C21H20N4O3      | 376.409 | Entinostat (MS-275)                |
| Selleck   |       |                                                                                                                                                                                                     |                 |         |                                    |
| Chemicals | S1163 | <chem>C(c1cc(C(C)C)c(O)cc1O)(N2Cc(c3C2)cc(CN4CCN(C)CC4)cc3)=O</chem>                                                                                                                                | C24H31N3O3      | 409.521 | AT13387                            |
| Selleck   |       |                                                                                                                                                                                                     |                 |         |                                    |
| Chemicals | S1067 | <chem>c1nc(c2c(c3ccc4c(OCO4)c3)nc(c5ccc(C(N)=O)cc5)[nH]2)ccc1</chem>                                                                                                                                | C22H16N4O3      | 384.387 | SB431542                           |
| Selleck   |       |                                                                                                                                                                                                     |                 |         |                                    |
| Chemicals | S1171 | <chem>c1(Nc2ccc(N3CCOCC3)cc2)nc(c4c(C)nc(N)s4)ccn1</chem>                                                                                                                                           | C18H20N6OS      | 368.456 | CYC116                             |
| Selleck   |       |                                                                                                                                                                                                     |                 |         |                                    |
| Chemicals | S1077 | <chem>c1cc(c2c(c3ccncc3)[nH]c(c4ccc(O)cc4)n2)ccc1F</chem>                                                                                                                                           | C20H14FN3O      | 331.343 | SB202190 (FHP1)                    |
| Selleck   |       |                                                                                                                                                                                                     |                 |         |                                    |
| Chemicals | S1180 | <chem>c1c(C(F)(F)F)ccc(c2nc3c(CSCC3)c(O)n2)c1</chem>                                                                                                                                                | C14H11F3N2OS    | 312.31  | XAV-939                            |
| Selleck   |       |                                                                                                                                                                                                     |                 |         |                                    |
| Chemicals | S1089 | <chem>c1(NS(=O)(=O)C2(CC2)[C@H](O)C)c(Nc3c(F)cc(1)cc3)c(F)c(F)cc1OC</chem>                                                                                                                          | C19H20F31N2O5S  | 572.337 | Refametinib (RDEA119, Bay 86-9766) |
| Selleck   |       | <chem>C(O)=O)[C@@H](NC(c1sc(N(C)Cc2ccc(c3c2)N=C(C)Nc3=O)cc1)=O)CC</chem>                                                                                                                            |                 |         |                                    |
| Chemicals | S1192 | <chem>C(O)=O</chem>                                                                                                                                                                                 | C21H22N4O6S     | 458.488 | Raltitrexed                        |
| Selleck   |       | <chem>c1(C(F)(F)F)cc2c(SC(N3CCC4(OC(C)CO4)CC3)=NC2=O)c([N+])([O-])=O)c1</chem>                                                                                                                      | C17H16F3N3O5S   | 431.386 | BTZ043 Racemate                    |
| Chemicals | S1097 |                                                                                                                                                                                                     |                 |         |                                    |
| Selleck   |       | <chem>C1=C[C@@]2(C)[C@@]([H])(CC[C@]3([H])(C@@]2([H])CC[C@@]4(C)[C@@]3([H])CC[C@H]4C(=O)Nc5c(C(F)(F)F)ccc(C(F)(F)F)c5)NC1=O</chem>                                                                  | C27H30F6N2O2    | 528.53  | Dutasteride                        |
| Chemicals | S1202 |                                                                                                                                                                                                     |                 |         |                                    |
| Selleck   |       |                                                                                                                                                                                                     |                 |         |                                    |
| Chemicals | S1106 | <chem>c(cccc1)(c2c(cc3n(c4ccc(NC(=O)CN)cc4)nc(C(F)(F)F)c3)cc2)cc5)c15</chem>                                                                                                                        | C26H19F3N4O     | 460.45  | OSU-03012 (AR-12)                  |
| Selleck   |       |                                                                                                                                                                                                     |                 |         |                                    |
| Chemicals | S1212 | <chem>c1cc2c(nc(CCCC(=O)O)n2C)cc1N(CCCl)CCCl.Cl</chem>                                                                                                                                              | C16H22Cl3N3O2   | 394.724 | Bendamustine HCl                   |
| Selleck   |       | <chem>[C@@]([H])([H])(C(=O)OC1)([C@@H](c2cc(OC)c(O)c(OC)c2)c3c(cc4c(OCO4)c3)[C@H]5O[C@@]6([H])(C@@H)(O)[C@@H](O)[C@@]7([H])(C@@]([H])(CO[C@@H](CO7)O6)[C@]15[H]</chem>                              | C29H32O13       | 588.557 | Etoposide                          |
| Chemicals | S1225 | <chem>C1CCN([C@H]2C[C@@]3(C)[C@@]([H])(CC[C@]4([H])(C@@]3([H])CC[C@@]5(C)[C@@]4([H])C[C@H]([N+](6C)CCCC6)[C@H]5O(C(=O)C)[C@@H]2O(C(=O)C)C1.[Br-]</chem>                                             | C34H57BrN2O4    | 637.731 | Vecuronium Bromide                 |
| Chemicals | S1405 |                                                                                                                                                                                                     |                 |         |                                    |
| Selleck   |       | <chem>c1(O)c(c([C@@]2(C(=O)OC)C[C@@]3([H])CN(C[C@@](CC)(O)C3)CCc4c2[nH]c5c4cccc5)cc6c(N(C=O)[C@]7([H])(C@]6(CC8)[C@@]([H])(N89)[C@@](CC)(C=CC9)[C@@H](OC(C)=O)[C@]7(O)C(=O)OC)c1.S(O)(O)(=O)</chem> | C46H58N4O14S    | 923.036 | Vincristine                        |
| Chemicals | S1241 |                                                                                                                                                                                                     |                 |         |                                    |
| Selleck   |       |                                                                                                                                                                                                     |                 |         |                                    |
| Chemicals | S1430 | <chem>c1(OC2CCCC2)cc(C3CC(=O)NC3)ccc1OC</chem>                                                                                                                                                      | C16H21NO3       | 275.343 | Rolipram                           |
| Selleck   |       |                                                                                                                                                                                                     |                 |         |                                    |
| Chemicals | S1255 | <chem>C(N)(=O)Cc1ccc(C(=O)c2cccc2)c1N</chem>                                                                                                                                                        | C15H14N2O2      | 254.284 | Nepafenac                          |
| Selleck   |       | <chem>c1cccc(CN2C([C@@H](C(C)C)N(C(=O)c3ccc(C)cc3)CCCN)=Nc4c(ccc(Cl)c4)C2=O)c1</chem>                                                                                                               | C30H33ClN4O2    | 517.062 | Ispinesib (SB-715992)              |
| Chemicals | S1452 |                                                                                                                                                                                                     |                 |         |                                    |
| Selleck   |       |                                                                                                                                                                                                     |                 |         |                                    |
| Chemicals | S1267 | <chem>c1(c2ccc(Cl)cc2)cc3c([nH]cc3C(c4c(F)ccc(NS(CCC(=O)=O)=O)c4F)=O)nc1</chem>                                                                                                                     | C23H18ClF2N3O3S | 489.922 | Vemurafenib (PLX4032, RG7204)      |
| Selleck   |       |                                                                                                                                                                                                     |                 |         |                                    |
| Chemicals | S1460 | <chem>c1cc2c(c3c(c4[nH]n3)c(ccc4)C2=O)cc1</chem>                                                                                                                                                    | C14H8N2O        | 220.226 | SP600125                           |

|           |       |                                                                                                                                          |                |         |                          |
|-----------|-------|------------------------------------------------------------------------------------------------------------------------------------------|----------------|---------|--------------------------|
| Selleck   |       | <chem>C1=C[C@@]2(C)C(C)[C@]3([H])[C@@]2([H])[C@H](O)[C@@]4(C)[C@@]3([H])[C@@]4(C)[C@@]5(C)[C@@]4(C)(=O)CO)O[C@]([H])(CCCO5)=CC1=O</chem> | C25H34O6       | 430.534 | Budesonide               |
| Chemicals | S1286 |                                                                                                                                          |                |         |                          |
| Selleck   |       | <chem>c1c(F)c(Nc2c(C(=O)N)[C@H](O)CO)ccnc2)ccc1</chem>                                                                                   | C15H15FIN3O3   | 431.201 | Pimasertib (AS-703026)   |
| Chemicals | S1475 |                                                                                                                                          |                |         |                          |
| Selleck   |       | <chem>N1C(=O)C(F)=CN([C@H]2CCCCO2)C1=O</chem>                                                                                            | C8H9FN2O3      | 200.167 | FT-207 (NSC 148958)      |
| Chemicals | S1300 |                                                                                                                                          |                |         |                          |
| Selleck   |       | <chem>c1nc2c(cc3ccc(CN4CCN(CC)CC4)cc3)[nH]2c(N[C@H](C)c5ccccc5)n1</chem>                                                                 | C27H32N6       | 440.583 | AEE788 (NVP-AEE788)      |
| Chemicals | S1486 |                                                                                                                                          |                |         |                          |
| Selleck   |       | <chem>c1(C(O)(Cn2cncn2)Cn3cncn3)ccc(F)cc1F</chem>                                                                                        | C13H12F2N6O    | 306.271 | Fluconazole              |
| Chemicals | S1331 |                                                                                                                                          |                |         |                          |
| Selleck   |       | <chem>c(C(=O)OC1)(c(O)c(CC=C(C)CCC(=O)OCCN2CCOCC2)c(O)c3C)c13</chem>                                                                     | C23H31NO7      | 433.495 | Mycophenolate Mofetil    |
| Chemicals | S1501 |                                                                                                                                          |                |         |                          |
| Selleck   |       | <chem>c1(CC(=O)NC(=S)Nc2cc(F)c(Oc3ccnc4c3sc(c5cn(C)cn5)c4)cc2)ccccc1</chem>                                                              | C26H20FN5O2S2  | 517.598 | MGCD-265 analog          |
| Chemicals | S1361 |                                                                                                                                          |                |         |                          |
| Selleck   |       | <chem>[C@@H]1(N)[C@@H](O)[C@]([H])(O)[C@@H]2[C@]([H])(O)[C@]3(O)[C@@H](O)[C@@]4([H])[C@H](O4)C=CC(=O)O[C@H](C)CC=CC=CC=C</chem>          |                |         |                          |
| Chemicals | S1517 |                                                                                                                                          |                |         |                          |
| Selleck   |       | <chem>C=C2[C@H](C(O)=O)[C@@H](O)C3O[C@H](C)[C@H]1O</chem>                                                                                | C33H47NO13     | 665.725 | Natamycin                |
| Chemicals | S1378 |                                                                                                                                          |                |         |                          |
| Selleck   |       | <chem>n1c(c2cnn([C@H](C3CCCC3)CC#N)c2)c4c([nH]cc4)nc1</chem>                                                                             | C17H18N6       | 306.365 | Ruxolitinib (INCB018424) |
| Chemicals | S1530 |                                                                                                                                          |                |         |                          |
| Selleck   |       | <chem>c1cc2c(NC(=O)C2=C(C3CCCCC3)Nc4cccc(CN(C)C)c4)cc1C(=O)NC</chem>                                                                     | C26H26N4O2     | 426.51  | BIX 02188                |
| Chemicals | S1392 |                                                                                                                                          |                |         |                          |
| Selleck   |       | <chem>c1(OCC)cc2c(c(Nc3ccc(F)c(Cl)c3)c(C#N)cn2)cc1NC(=O)C=CCN(C)C</chem>                                                                 | C24H23ClFN5O2  | 467.923 | Pelitinib (EKB-569)      |
| Chemicals | S1392 |                                                                                                                                          |                |         |                          |
| Selleck   |       | <chem>[nH]1c2c(cc(Cl)cc2)c3c1C(C(N)=O)CCC3</chem>                                                                                        | C13H13ClN2O    | 248.708 | EX 527 (Selisistat)      |
| Chemicals | S1541 |                                                                                                                                          |                |         |                          |
| Selleck   |       | <chem>c1c(F)c2c(c(NC(=O)Nc3ccc(N(C)C)cc3)cc(C)n2)cc1F</chem>                                                                             | C19H18F2N4O    | 356.369 | SB408124                 |
| Chemicals | S1545 |                                                                                                                                          |                |         |                          |
| Selleck   |       | <chem>c1c(C(=O)O)ccc(n2nc(c3c(O)cccc3)nc2c4c(O)cccc4)c1</chem>                                                                           | C21H15N3O4     | 373.362 | Deferasirox              |
| Chemicals | S1712 |                                                                                                                                          |                |         |                          |
| Selleck   |       | <chem>c1(Cl)ccc(C2(CCNCC2)c3ccc(c4cn[nH]c4)cc3)cc1</chem>                                                                                | C20H20ClN3     | 337.846 | AT 7867                  |
| Chemicals | S1558 |                                                                                                                                          |                |         |                          |
| Selleck   |       | <chem>c1cc2c(ccccc2CN(CC=CC#CC(C)(C)C)cc1</chem>                                                                                         | C21H25N        | 291.43  | Terbinafine              |
| Chemicals | S1725 |                                                                                                                                          |                |         |                          |
| Selleck   |       | <chem>c1ccc(S(=O)(=O)N2CCCNCC2)c3c1cnc3.Cl</chem>                                                                                        | C14H18ClN3O2S  | 327.83  | Fasudil (HA-1077) HCl    |
| Chemicals | S1573 |                                                                                                                                          |                |         |                          |
| Selleck   |       | <chem>C1=C[C@@]2(C)C(C)[C@]3([H])[C@@]2([H])[C@H](O)[C@@]4(C)[C@@]3([H])[C@@]4(C)[C@@]5(C)[C@@]4(C)(=O)CO)=CC1=O</chem>                  | C21H28O5       | 360.444 | Prednisolone             |
| Chemicals | S1737 |                                                                                                                                          |                |         |                          |
| Selleck   |       | <chem>C(C)(C)[C@H](O)C(=O)N[C@@H](C)C(=O)N[C@H]1C(=O)N(C)CCc2c1ccc2</chem>                                                               | C19H27N3O4     | 361.435 | Semagacestat (LY450139)  |
| Chemicals | S1594 |                                                                                                                                          |                |         |                          |
| Selleck   |       | <chem>c1nc(C(N)=O)cnc1</chem>                                                                                                            | C5H5N3O        | 123.113 | Pyrazinamide             |
| Chemicals | S1762 |                                                                                                                                          |                |         |                          |
| Selleck   |       | <chem>c1(N)ccc(S(=O)(=O)Nc2ccc(OC)cn2)cc1</chem>                                                                                         | C11H12N4O3S    | 280.303 | Sulfameter               |
| Chemicals | S1618 |                                                                                                                                          |                |         |                          |
| Selleck   |       | <chem>c1nc2c(ncn2[C@H]3O[C@H](CO)[C@@H](O)[C@@H]3O)c(N)n1</chem>                                                                         | C10H13N5O4     | 267.241 | Vidarabine               |
| Chemicals | S1784 |                                                                                                                                          |                |         |                          |
| Selleck   |       | <chem>C1(=O)O[C@@H](C[C@@H](OC([C@@H](NC=O)CC(C)C)=O)CCCCC</chem>                                                                        |                |         |                          |
| Chemicals | S1629 |                                                                                                                                          |                |         |                          |
| Selleck   |       | <chem>CCCCC[C@H]1CCCCC</chem>                                                                                                            | C29H53NO5      | 495.735 | Orlistat                 |
| Chemicals | S1806 |                                                                                                                                          |                |         |                          |
| Selleck   |       | <chem>c1nc(C(O)=O)c[n+](O-)[c]1C</chem>                                                                                                  | C6H6N2O3       | 154.123 | Acipimox                 |
| Chemicals | S1806 |                                                                                                                                          |                |         |                          |
| Selleck   |       | <chem>c1([N+])(=O)[O-])oc(C=NNC(=O)N)cc1</chem>                                                                                          | C6H6N4O4       | 198.136 | Nitrofuril               |
| Chemicals | S1644 |                                                                                                                                          |                |         |                          |
| Selleck   |       | <chem>c1c(Cl)c(SC(Cc2ccc(Cl)cc2)Cn3ccnc3)c(Cl)cc1.[N+](O)(=O)[O-]</chem>                                                                 | C19H18Cl3N3O3S | 474.789 | Butoconazole nitrate     |
| Chemicals | S1833 |                                                                                                                                          |                |         |                          |
| Selleck   |       | <chem>c1cc(CCN(C)CCOc2ccc(NS(=O)(=O)C)cc2)ccc1NS(=O)(=O)C</chem>                                                                         | C19H27N3O5S2   | 441.565 | Dofetilide               |
| Chemicals | S1658 |                                                                                                                                          |                |         |                          |
| Selleck   |       | <chem>c1cc2c(OC=C(C3ccc(O)cc3)C2=O)cc1O</chem>                                                                                           | C15H10O4       | 254.238 | Daidzein                 |
| Chemicals | S1849 |                                                                                                                                          |                |         |                          |
| Selleck   |       | <chem>NCCN.N1(C)C(=O)c2c(nc[nH]2)N(C)C1=O.N3(C)C(=O)c4c(nc[nH]4)N(C)C3=O</chem>                                                          | C16H24N10O4    | 420.426 | Aminophylline            |
| Chemicals | S1673 |                                                                                                                                          |                |         |                          |
| Selleck   |       | <chem>C(l)(C(=O)NC(=O)N1[C@H]2C[C@H](O)[C@@H](CO)O2)=C1</chem>                                                                           | C9H11N2O5      | 354.099 | Idoxuridine              |
| Chemicals | S1883 |                                                                                                                                          |                |         |                          |
| Selleck   |       | <chem>CS(=O)(=O)OCCCCOS(=O)(=O)C</chem>                                                                                                  | C6H14O6S2      | 246.302 | Busulfan                 |
| Chemicals | S1692 |                                                                                                                                          |                |         |                          |
| Selleck   |       | <chem>c1ccc(Cl)c(Nc2ccccc2CC(=O)[O-])c1Cl.[Na+]</chem>                                                                                   | C14H10Cl2NNaO2 | 318.13  | Diclofenac Sodium        |
| Chemicals | S1903 |                                                                                                                                          |                |         |                          |
| Selleck   |       | <chem>c1cc(S(=O)(=O)Nc2nc(C)c2C)ccc1N</chem>                                                                                             | C11H13N3O3S    | 267.304 | Sulfisoxazole            |
| Chemicals | S1916 |                                                                                                                                          |                |         |                          |

|           |       |                                                                                                                                          |                 |         |                        |
|-----------|-------|------------------------------------------------------------------------------------------------------------------------------------------|-----------------|---------|------------------------|
| Selleck   |       |                                                                                                                                          |                 |         |                        |
| Chemicals | S2134 | <chem>c1c(F)c(NC2=C(C(=O)NOC(=O)C=C(C)C(=O)N2C)ccc1I</chem>                                                                              | C16H17F1N3O4    | 461.227 | AZD8330                |
| Selleck   |       |                                                                                                                                          |                 |         |                        |
| Chemicals | S1952 | <chem>C1=Cc2c(c(OC)c3c(ccc3)c2)OC1=O</chem>                                                                                              | C12H8O4         | 216.19  | Methoxsalen            |
| Selleck   |       | <chem>c(nc(Nc1ccc(C(F)(F)F)cc1)n2C)(cc(Oc3cc(c4ncc(C(F)(F)F)[nH]4)ncc3)cc5)</chem>                                                       |                 |         |                        |
| Chemicals | S2161 | <chem>c25</chem>                                                                                                                         | C24H16F6N6O     | 518.414 | RAF265 (CHIR-265)      |
| Selleck   |       |                                                                                                                                          |                 |         |                        |
| Chemicals | S1974 | <chem>CNC[C@H](O)[C@@H](O)[C@H](O)[C@H](O)CO</chem>                                                                                      | C7H17NO5        | 195.214 | Meglumine              |
| Selleck   |       | <chem>c1cccc(CC2=C([C@@H](C(C)C)N(CCCN)C(c3ccc(C)cc3)=O)Oc4c(ccc(Cl)c4)C2=O)c1.Cl</chem>                                                 | C31H34Cl2N2O3   | 553.519 | SB743921               |
| Chemicals | S2182 | <chem>N1(C)C(=O)C(O)=C(C(=O)NCC2ccc(F)cc2)N=C1C(C)(C)NC(=O)Cc3oc(C)nn3</chem>                                                            | C20H21FN6O5     | 444.416 | Raltegravir (MK-0518)  |
| Selleck   |       |                                                                                                                                          |                 |         |                        |
| Chemicals | S2201 | <chem>n1ccc(Oc2c(F)cc(NC(=O)C(C(=O)C(c3ccc(F)cc3)=CN4=C4)cc2)c(Cl)c1N</chem>                                                             | C23H15ClF2N4O3  | 468.84  | BMS-794833             |
| Selleck   |       | <chem>O=C1O[C@]2([H])[C@@](O)([C@]3(O4)C(C)[C@]([H])(O)C(=O)O5([C@H]45)[C@]([H])(C(C)(C)C)O6)([C@]6([H])O C3=O)C2)[C@]1([H])C</chem>     | C20H24O9        | 408.399 | Ginkgolide A           |
| Chemicals | S2026 |                                                                                                                                          |                 |         |                        |
| Selleck   |       | <chem>n1c(N)c2c(n(C(C)C)nc2c3cc4c(ccc(O)c4)[nH]3)nc1</chem>                                                                              | C16H16N6O       | 308.338 | PP242                  |
| Chemicals | S2218 |                                                                                                                                          |                 |         |                        |
| Selleck   |       | <chem>c1(cccc(O)c1)N(CC2=NCCN2)c3ccc(C)cc3.CS(=O)(=O)O</chem>                                                                            | C18H23N3O4S     | 377.458 | Phentolamine Mesylate  |
| Chemicals | S2038 |                                                                                                                                          |                 |         |                        |
| Selleck   |       | <chem>c1ccc(c2cc(C(=O)O)ccc2)c(O)c1NN=C3C(C)=NN(c4cc(C)c(C)cc4)C3=O</chem>                                                               | C25H22N4O4      | 442.467 | Eltrombopag            |
| Chemicals | S2229 |                                                                                                                                          |                 |         |                        |
| Selleck   |       | <chem>C(Cl)(C(O)=CC(=O)N1)=C1</chem>                                                                                                     | C5H4ClNO2       | 145.544 | Gimeracil              |
| Chemicals | S2055 |                                                                                                                                          |                 |         |                        |
| Selleck   |       | <chem>c1ccc([C@H](C(C)C)C(=O)Nc2ccc(C(=O)NO)cc2)cc1</chem>                                                                               | C18H20N2O3      | 312.363 | AR-42                  |
| Chemicals | S2244 |                                                                                                                                          |                 |         |                        |
| Selleck   |       | <chem>n1c(Cl)c(NC(NCC2=N2)c(OC)nc1C</chem>                                                                                               | C9H12ClN5O      | 241.677 | Moxonidine             |
| Chemicals | S2066 | <chem>[C@@H]1(O)CC[C@]2(C)[C@]([H])(CCC(=C)[C@@H]2CC=C3C(O)CO C3=O)[C@]1(C)CO</chem>                                                     | C20H30O5        | 350.449 | Andrographolide        |
| Selleck   |       |                                                                                                                                          |                 |         |                        |
| Chemicals | S2097 | <chem>[C@H](C(OC)(c1cccc1)c2ccccc2)(C(=O)O)Oc3nc(C)cc(C)n3</chem>                                                                        | C22H22N2O4      | 378.421 | Ambrisentan            |
| Selleck   |       | <chem>[C@@H]1(O)[C@H](C(O)=O)O[C@H](Oc2cc3c(C(=O)C=C(c4ccccc4)O3)c(O)c2O)[C@H](O)[C@H]1O</chem>                                          | C21H18O11       | 446.361 | Baicalin               |
| Chemicals | S2269 |                                                                                                                                          |                 |         |                        |
| Selleck   |       | <chem>c1(O)c(CN(C(C)C)c2c(n(C)c(CSc3ccccc3)c2C(=O)OCC)cc1Br.Cl</chem>                                                                    | C22H26BrClN2O3S | 513.875 | Arbidol HCl            |
| Chemicals | S2120 |                                                                                                                                          |                 |         |                        |
| Selleck   |       | <chem>C([C@H](C[C@@H]1C2)CNC1)(=CC=CC3=O)N23</chem>                                                                                      | C11H14N2O       | 190.242 | Cytisine               |
| Chemicals | S2287 |                                                                                                                                          |                 |         |                        |
| Selleck   |       | <chem>c1(C#N)cc(c2nc(C)c(C(=O)O)s2)ccc1OCC(C)C</chem>                                                                                    | C16H16N2O3S     | 316.375 | Febuxostat             |
| Chemicals | S1547 |                                                                                                                                          |                 |         |                        |
| Selleck   |       | <chem>c1ccc(NC(=O)C2=C(O)Cc3c(cccc3)S(=O)(=O)N2C)nc1</chem>                                                                              | C15H13N3O4S     | 331.346 | Piroxicam              |
| Chemicals | S1713 | <chem>c1(Cl)c(Oc2c(F)cc(NC(C3=C(OCC)C=CN(c4ccc(F)cc4)C3=O)=O)cc2)ccnc1N</chem>                                                           | C25H19ClF2N4O4  | 512.893 | BMS-777607             |
| Selleck   |       |                                                                                                                                          |                 |         |                        |
| Chemicals | S1729 | <chem>c1c(C)c(OCCCC(C)(C)C(O)=O)cc(C)c1</chem>                                                                                           | C15H22O3        | 250.333 | Gemfibrozil            |
| Selleck   |       | <chem>c1cc(OCCN2CCOCC2)c3c(cccc3)c1NC(=O)Nc4n(c5ccc(C)cc5)nc(C(C)(C)C)c4</chem>                                                          | C31H37N5O3      | 527.657 | BIRB 796 (Doramapimod) |
| Chemicals | S1574 |                                                                                                                                          |                 |         |                        |
| Selleck   |       | <chem>c1cccc(c2ccc(Cn3c4c(c(C)cc(c5nc6c(cccc6)n5C)p4)nc3CCC)cc2)c1C(=O)O</chem>                                                          | C33H30N4O2      | 514.617 | Telmisartan            |
| Chemicals | S1738 | <chem>c(c1c(cc(OC)cc1)[nH]2)(CCN3[C@]4([H])C[C@@]5([H])[C@]([H])(C[C@@H](OC)c6cc(OC)c(OC)c(OC)c6)=O)[C@H](OC)[C@H]5C(=O)OC)C3)c24</chem> | C33H40N2O9      | 608.679 | Reserpine              |
| Selleck   |       | <chem>c1(C=NN2CCN(C)CC2)c(O)c(c(C(=O)[C@]3(C)O4)c45)c(c(O)c5C)c(O)c1N</chem>                                                             |                 |         |                        |
| Chemicals | S1601 | <chem>C(=O)C(C)=CC=C[C@H](C)[C@H](O)[C@@H](C)[C@@H](O)[C@H](C)[C@H](OC(C)=O)[C@H](C)[C@H](OC)C=CO3</chem>                                | C43H58N4O12     | 822.94  | Rifampin               |
| Selleck   |       | <chem>[C@]([H])([H])(OCC1)(OC[C@@]2(O C(=O)N[C@@]([C@@]([H])CN(S(=O)(=O)Cc3ccc(N)cc3)CC(C)C([H])Cc4ccccc4)[H])[C@@]12[H].CCO</chem>      | C29H43N3O8S     | 593.732 | Darunavir Ethanolate   |
| Chemicals | S1764 | <chem>c1c2c(O CO2)cc3c1[C@@H](O)[C@@H]4O[C@H]5[C@@H](O)[C@H](c6sccc6)O C5)[C@H](O)[C@H]4O)[C@@H]7[C@]([H])(C(=O)OC7)[C@H]3c8</chem>      | C32H32O13S      | 656.654 | Teniposide             |
| Selleck   |       | <chem>cc(OC)c(O)c(OC)c8</chem>                                                                                                           |                 |         |                        |
| Chemicals | S1787 |                                                                                                                                          |                 |         |                        |
| Selleck   |       | <chem>C(NC(=O)c1c2[nH]nc1)=N2.[Na+]</chem>                                                                                               | C5H4N4NaO       | 159.101 | Allopurinol Sodium     |
| Chemicals | S1631 |                                                                                                                                          |                 |         |                        |
| Selleck   |       | <chem>OCCOCn1cnc2c1N=C(N)NC2=O</chem>                                                                                                    | C8H11N5O3       | 225.205 | Aciclovir              |
| Chemicals | S1807 |                                                                                                                                          |                 |         |                        |
| Selleck   |       | <chem>c1cc(C(=O)c2cc(C(C)C(=O)O)ccc2)ccc1</chem>                                                                                         | C16H14O3        | 254.281 | Ketoprofen             |
| Chemicals | S1645 |                                                                                                                                          |                 |         |                        |

|         |           |       |                                                                                                                                                                                                     |                |         |                          |
|---------|-----------|-------|-----------------------------------------------------------------------------------------------------------------------------------------------------------------------------------------------------|----------------|---------|--------------------------|
| Selleck | Chemicals | S1835 | <chem>[C@@H]1(O)[C@@H](C)N(C)C[C@@H](C)C[C@](O)(C)[C@H](O)[C@@H]2C@@H](O)[C@@H](N(C)C)C[C@@H](C)O2)[C@@H](C)[C@H](O)[C@@H]3O[C@@H](C)[C@H](O)[C@@](OC)(C)C3[C@H](C)C(=O)O[C@H](CC)[C@@]1(C)O</chem> | C38H72N2O12    | 748.984 | Azithromycin             |
| Selleck | Chemicals | S1662 | <chem>c1cc2c(non2)c(C3C(C(=O)O)C(C)C)=C(C)NC(C)=C3C(OC)=O)c1</chem>                                                                                                                                 | C19H21N3O5     | 371.387 | Isradipine               |
| Selleck | Chemicals | S1855 | <chem>c1(F)cc2c(N(CC)C=C(C(=O)=O)C2=O)cc1N3CCN(C)CC3.S(O)(=O)(=O)C</chem>                                                                                                                           | C18H24FN3O6S   | 429.463 | Pefloxacin Mesylate      |
| Selleck | Chemicals | S1676 | <chem>c1cc(CC(C)CN2C[C@@H](C)O[C@@H](C)C2)ccc1C(C)(C)CC.Cl</chem>                                                                                                                                   | C21H36ClNO     | 353.97  | Amorolfine HCl           |
| Selleck | Chemicals | S1884 | <chem>[C@@H]1(C)CN(c2c(F)c(N)c3c(N(C4CC4)C=C(C(=O)O)C3=O)c2F)C[C@H](C)N1</chem>                                                                                                                     | C19H22F2N4O3   | 392.4   | Sparfloxacin             |
| Selleck | Chemicals | S1701 | <chem>C1=C[C@@]2(C)C(C[C@]3([H])[C@@]2([H])[C@H](O)C[C@@]4(C)[C@@]3([H])C[C@]5([H])[C@]4(C=O)CO)OC(C)(C)O5)=CC1=O</chem>                                                                            | C24H32O6       | 416.507 | Desonide                 |
| Selleck | Chemicals | S1904 | <chem>c1cc(C(=O)CC(=O)c2ccc(C(C)(C)C)cc2)ccc1OC</chem>                                                                                                                                              | C20H22O3       | 310.387 | Avobenzone               |
| Selleck | Chemicals | S1917 | <chem>c1c(N(C)C)ccc(C(=C2C=CC(=[N+](C)C)C=C2)c3ccc(N(C)C)cc3)c1.[Cl-]</chem>                                                                                                                        | C25H30ClN3     | 407.979 | Crystal Violet           |
| Selleck | Chemicals | S2149 | <chem>c1(c2ccc(S(C)(=O)=O)cc2)nc(OCC3CCN(c4onc(C(C)C)n4)CC3)cc1</chem>                                                                                                                              | C23H28N4O4S    | 456.558 | GSK1292263               |
| Selleck | Chemicals | S1956 | <chem>c1cc(C(Cn2cnc2)OCc3c(Cl)cc(C)cc3)c(Cl)cc1Cl.O[N+][([O-])=O</chem>                                                                                                                             | C18H15Cl4N3O4  | 479.141 | Miconazole Nitrate       |
| Selleck | Chemicals | S2162 | <chem>c1(Nc2cc(C)[nH]n2)c(Cl)cnc(N[C@@H](C)c3ncc(F)cn3)n1[Br-].[C@@]1([H])(C[C@H](OC(=O)[C@H](CO)c2ccccc2)C3([N+](C)(C)[C@]3([H])[C@@]4([H])[C@]1([H])O4</chem>                                     | C14H14ClFN8    | 348.766 | AZD1480                  |
| Selleck | Chemicals | S1978 | <chem>C(Nc1ccc(c2c1)ncnc2Nc3ccc(OCc4ccccc(F)c4)c(Cl)c3)(=O)C=C.c5c(S(=O)(=O)O)ccc(C)c5</chem>                                                                                                       | C18H24BrNO4    | 398.291 | Methscopolamine          |
| Selleck | Chemicals | S2185 |                                                                                                                                                                                                     | C31H26ClFN4O5S | 621.078 | AST-1306                 |
| Selleck | Chemicals | S2006 | <chem>n1c(N)c(c2ccc(Cl)cc2)c(CC)nc1N</chem>                                                                                                                                                         | C12H13ClN4     | 248.711 | Pyrimethamine            |
| Selleck | Chemicals | S2202 | <chem>c(cnn1C)(c(Nc2c(C)ccc(C(=O)Nc3cc(C(F)(F)F)ccc3)c2)nc(c4cnccc4)n5)c15</chem>                                                                                                                   | C26H20F3N7O    | 503.479 | NVP-BHG712               |
| Selleck | Chemicals | S2028 | <chem>c1cc(C(C#N)c2c(Cl)cc(N3C(=O)NC(=O)C=N3)cc2)ccc1Cl</chem>                                                                                                                                      | C17H9Cl3N4O2   | 407.638 | Diclazuril               |
| Selleck | Chemicals | S2219 | <chem>c1cc(Nc2nc(c3ccc(C(=O)NCC#N)cc3)cn2)ccc1N4CCOCC4</chem>                                                                                                                                       | C23H22N6O2     | 414.46  | CYT387                   |
| Selleck | Chemicals | S2040 | <chem>c1c(NS(C)(=O)=O)c(Oc2ccccc2)cc([N+][([O-])=O])c1</chem>                                                                                                                                       | C13H12N2O5S    | 308.31  | Nimesulide               |
| Selleck | Chemicals | S2230 | <chem>c1(C)nc(c2c(c3c4c(ccc(C(N)=O)c4)nc3)c5n(CCC5)n2)ccc1</chem>                                                                                                                                   | C22H19N5O      | 369.419 | LY2157299                |
| Selleck | Chemicals | S2058 | <chem>c1(cccc(C)c1)N(C)C(=S)Oc2cc3c(cccc3)cc2</chem>                                                                                                                                                | C19H17NOS      | 307.409 | Tolnaftate               |
| Selleck | Chemicals | S2247 | <chem>c1c(C(F)(F)F)c(c2cc(N3CCOCC3)nc(N4CCOCC4)n2)cn1N</chem>                                                                                                                                       | C18H21F3N6O2   | 410.394 | Buparlisib               |
| Selleck | Chemicals | S2067 | <chem>c1cc(C=CC(=O)O)ccc1Cn2ccnc2.Cl</chem>                                                                                                                                                         | C13H13ClN2O2   | 264.708 | Ozagrel HCl              |
| Selleck | Chemicals | S2262 | <chem>c1c(O)cc2c(C(=O)C=C(c3ccc(O)cc3)O2)c1O</chem>                                                                                                                                                 | C15H10O5       | 270.237 | Apigenin                 |
| Selleck | Chemicals | S2098 | <chem>c(C(C)(C)CCC1(C)C)(cc(C)c(C(=C)c2ccc(C(O)=O)cc2)c3)c13</chem>                                                                                                                                 | C24H28O2       | 348.478 | Bexarotene               |
| Selleck | Chemicals | S2270 | <chem>[C@H]1(CO)O[C@]2([H])[C@]([H])(O)C(=O)c3c2c(O)c(OC)c(O)c3)[C@@H](O)[C@@H]1O</chem>                                                                                                            | C14H16O9       | 328.271 | Bergenin                 |
| Selleck | Chemicals | S2121 | <chem>c1(c(CC(O)=O)n2c(CC(C)(C)C2)c1c3ccccc3)c4ccc(Cl)cc4</chem>                                                                                                                                    | C23H22ClNO2    | 379.879 | Licofelone               |
| Selleck | Chemicals | S2290 | <chem>C1[C@H](C)[C@@]2([H])[C@]([O3]([C@]4([H])O[C@@]3(C)CC2)[C@]([H])([C@@H](C)[C@H](O)O4)C1</chem>                                                                                                | C15H24O5       | 284.348 | Dihydroartemisinin (DHA) |
| Selleck | Chemicals | S1548 | <chem>c1([C@H]2[C@@H](O)[C@H](O)[C@H](O)[C@H](CO)O2)cc(Cc3ccc(OCC)cc3)c(Cl)cc1</chem>                                                                                                               | C21H25ClO6     | 408.873 | Dapagliflozin            |
| Selleck | Chemicals | S1714 | <chem>N(C(=O)N([C@H]1C(F)(F)[C@H](O)[C@@H](CO)O1)C=C2)=C2N</chem>                                                                                                                                   | C9H11F2N3O4    | 263.198 | Gemcitabine              |
| Selleck | Chemicals | S1565 | <chem>c(OC(F)(F)O1)(ccc(C2(CC2)C(=O)Nc3ccc(C)c(c4cc(C(=O)O)ccc4)n3)c5)c15</chem>                                                                                                                    | C24H18F2N2O5   | 452.407 | VX-809 (Lumacaftor)      |
| Selleck | Chemicals | S1730 | <chem>c1cc(Cl)c(S(=O)(=O)N)cc1C(=O)NN2C(C)Cc3c2ccccc3</chem>                                                                                                                                        | C16H16ClN3O3S  | 365.835 | Indapamide               |
| Selleck | Chemicals | S1575 | <chem>O=C1[C@H](NC(=O)C(C)C(=O)NCC(F)(F)C(F)(F)F)c2c(cccc2)c3c(ccc(c3)N1</chem>                                                                                                                     | C22H20F5N3O3   | 469.405 | RO4929097                |

|           |       |                                                                                                                                                                         |               |         |                                  |
|-----------|-------|-------------------------------------------------------------------------------------------------------------------------------------------------------------------------|---------------|---------|----------------------------------|
| Selleck   |       |                                                                                                                                                                         |               |         |                                  |
| Chemicals | S1739 | <chem>n1c(c2nc3c(cccc3)[nH]2)csc1</chem>                                                                                                                                | C10H7N3S      | 201.248 | Thiabendazole                    |
| Selleck   |       |                                                                                                                                                                         |               |         |                                  |
| Chemicals | S1603 | <chem>c1(C(=O)O)c(NCc2cccc2)cc(C)c(S(=O)(=O)N)c1</chem>                                                                                                                 | C12H11ClN2O5S | 330.744 | Furosemide                       |
| Selleck   |       | <chem>C1(C(C)=C(C=C(C(C)=CC=CC(C)=CC=C(C(C)=CC(C(C)(C)CCC2=C2C)C(C)C)CC1</chem>                                                                                         | C40H56        | 536.873 | Beta Carotene                    |
| Chemicals | S1767 | <chem>C1=C[C@@]2(C)C(C[C@]3([H])[C@@]2([H])C(=O)C[C@@]4(C)[C@@]3([H])CC[C@]4(O)C(=O)CO)=CC1=O</chem>                                                                    | C21H26O5      | 358.428 | Prednisone                       |
| Chemicals | S1622 | <chem>[C@@H]1(O)[C@@H](C)[C@@H](O)[C@H](C)C=CC=C(C)C(=O)Nc2c(O)c(c(c(C(=O)[C@]3(C)OC=C[C@H](O)C[C@@H](C)[C@@H](OC(=O)C)[C@@H]1C)c4O3)c5c2n6c(cc(C)cc6)n5)c(O)c4C</chem> | C43H51N3O11   | 785.879 | Rifaximin                        |
| Selleck   | S1790 | <chem>c(n(C)cc1Cc2c(OC)cc(C(NS(=O)(=O)C3C(C)cccc3)=O)cc2)(ccc(NC(=O)OC4CCCC4)c5)c15</chem>                                                                              | C31H33N3O6S   | 575.675 | Zafirlukast                      |
| Selleck   |       |                                                                                                                                                                         |               |         |                                  |
| Chemicals | S1811 | <chem>c1(Cl)nc(C(=O)NC(=N)N)c(N)nc1N.Cl</chem>                                                                                                                          | C6H9Cl2N7O    | 266.088 | Amiloride HCl                    |
| Selleck   |       |                                                                                                                                                                         |               |         |                                  |
| Chemicals | S1646 | <chem>c1ccc(C(=O)c2n3c(C(C(=O)=O)CC3)cc2)cc1.OCC(N)(CO)CO</chem>                                                                                                        | C19H24N2O6    | 376.404 | Ketorolac                        |
| Selleck   |       |                                                                                                                                                                         |               |         |                                  |
| Chemicals | S1836 | <chem>c1(S(=O)CCC)cc2c(nc(NC(OC)=O)[nH]2)cc1</chem>                                                                                                                     | C12H15N3O3S   | 281.331 | Albendazole Oxide                |
| Selleck   |       | <chem>c1cc2c(C[C@]3([H])[C@@]2([H])CC[C@]4(C)[C@@]3([H])CCC4=O)c</chem>                                                                                                 | C18H22O2      | 270.366 | Estrone                          |
| Chemicals | S1665 | <chem>c1O</chem>                                                                                                                                                        |               |         |                                  |
| Selleck   |       |                                                                                                                                                                         |               |         |                                  |
| Chemicals | S1859 | <chem>c1(O)ccc(C(CC)=C(CC)c2ccc(O)cc2)cc1</chem>                                                                                                                        | C18H20O2      | 268.35  | Diethylstilbestrol               |
| Selleck   |       |                                                                                                                                                                         |               |         |                                  |
| Chemicals | S1677 | <chem>c1cc([C@@H](O)[C@@H](CO)NC(C(Cl)Cl)=O)ccc1[N+](=[O-])=O</chem>                                                                                                    | C11H12Cl2N2O5 | 323.129 | Chloramphenicol                  |
| Selleck   |       |                                                                                                                                                                         |               |         |                                  |
| Chemicals | S1889 | <chem>c1c(O)c2c(C(=O)c3c(c(NCCNCCO)ccc3NCCNCCO)C2=O)c(O)c1</chem>                                                                                                       | C22H28N4O6    | 444.481 | Mitoxantrone                     |
| Selleck   |       |                                                                                                                                                                         |               |         |                                  |
| Chemicals | S1702 | <chem>[C@H]1(CO)O[C@@H](n2cnc3c2N=CNC3=O)CC1</chem>                                                                                                                     | C10H12N4O3    | 236.227 | Didanosine                       |
| Selleck   |       |                                                                                                                                                                         |               |         |                                  |
| Chemicals | S1907 | <chem>n1(c(C)nc1[N+](=[O-])=O)CCO</chem>                                                                                                                                | C6H9N3O3      | 171.154 | Metronidazole                    |
| Selleck   |       |                                                                                                                                                                         |               |         |                                  |
| Chemicals | S1928 | <chem>c1c(CC=C)cc(C(NCCO)=O)c(O)c1OC</chem>                                                                                                                             | C13H17NO4     | 251.278 | Alibendol                        |
| Selleck   |       | <chem>c1(NC(=O)c2cccc(c3ccc(OC(F)(F)F)cc3)c2C)cnc(N4C[C@@H](C)O[C@@H](C)C4)cc1</chem>                                                                                   | C26H26F3N3O3  | 485.498 | LDE225 (NVP-LDE225, Erismodegib) |
| Chemicals | S2151 |                                                                                                                                                                         |               |         |                                  |
| Selleck   |       |                                                                                                                                                                         |               |         |                                  |
| Chemicals | S1957 | <chem>c1cc(S(=O)(=O)Nc2nnc(C)s2)ccc1N</chem>                                                                                                                            | C9H10N4O2S2   | 270.331 | Sulfamethizole                   |
| Selleck   |       |                                                                                                                                                                         |               |         |                                  |
| Chemicals | S2170 | <chem>c1c(CN(CC)CC)cc2c(cc(COC(=O)Nc3ccc(C(=O)NO)cc3)cc2)c1.O.Cl</chem>                                                                                                 | C24H30ClN3O5  | 475.965 | Givinostat (ITF2357)             |
| Selleck   |       |                                                                                                                                                                         |               |         |                                  |
| Chemicals | S1979 | <chem>c1(OCCN(CC)CC)c(l)cc(C(c2c3c(cccc3)oc2CCCC)=O)cc1.Cl</chem>                                                                                                       | C25H30Cl2NO3  | 681.773 | Amiodarone HCl                   |
| Selleck   |       |                                                                                                                                                                         |               |         |                                  |
| Chemicals | S2186 | <chem>c1(C)nc(c2c(c3ccc4c(OCO4)c3)nc(C(C)(C)C)[nH]2)ccc1</chem>                                                                                                         | C20H21N3O2    | 335.4   | SB505124                         |
| Selleck   |       |                                                                                                                                                                         |               |         |                                  |
| Chemicals | S2007 | <chem>c1c(C=C2C(C)=C(CC(O)=O)c3c2ccc(F)c3)ccc(S(=O)C)c1</chem>                                                                                                          | C20H17FO3S    | 356.411 | Sulindac                         |
| Selleck   |       |                                                                                                                                                                         |               |         |                                  |
| Chemicals | S2205 | <chem>c1c(Nc2c3c(cc(OCOC)c(OCOC)c3)ncn2)cccc1C#C.Cl</chem>                                                                                                              | C21H22ClN3O4  | 415.87  | OSI-420                          |
| Selleck   |       |                                                                                                                                                                         |               |         |                                  |
| Chemicals | S2029 | <chem>C1=CC(=O)NC(=O)N1[C@H]2[C@@H](O)[C@H](O)[C@@H](CO)O2</chem>                                                                                                       | C9H12N2O6     | 244.201 | Uridine                          |
| Selleck   |       |                                                                                                                                                                         |               |         |                                  |
| Chemicals | S2220 | <chem>n1c(c2ccc(OCCN(C)C)cc2)[nH]c(c3cc4c(C(=NO)CC4)cc3)c1c5ccncc5</chem>                                                                                               | C27H27N5O2    | 453.536 | SB590885                         |
| Selleck   |       | <chem>[C@@H]1(C2)[C@@H]2[C@@]3(C)C(C(C)Cl)=C[C@]4([H])[C@@]3([H])CC[C@@]5(C)[C@@]4([H])CC[C@]5(OC(=O)C(C)=O)=CC1=O</chem>                                               | C24H29ClO4    | 416.938 | Cyproterone Acetate              |
| Chemicals | S2042 |                                                                                                                                                                         |               |         |                                  |
| Selleck   |       |                                                                                                                                                                         |               |         |                                  |
| Chemicals | S2231 | <chem>n1nc(OCc2ccnc(C(NC)=O)c2)c3c(ccc3)c1Nc4ccc(Cl)cc4</chem>                                                                                                          | C20H16ClN5O3  | 409.826 | Telatinib                        |
| Selleck   |       |                                                                                                                                                                         |               |         |                                  |
| Chemicals | S2059 | <chem>c(cc(OC)c(C)C)c1(nc(N2CCN(C(=O)C3OCCC3)CC2)nc4N)c14.Cl.O.O</chem>                                                                                                 | C19H30ClN5O6  | 459.924 | Terazosin HCl                    |
| Selleck   |       |                                                                                                                                                                         |               |         |                                  |
| Chemicals | S2248 | <chem>c1cc2c(c3c(cc(C(O)=O)cc3)nc2Nc4cccc(Cl)c4)cn1</chem>                                                                                                              | C19H12ClN3O2  | 349.77  | CX-4945 (Silmilasertib)          |
| Selleck   |       |                                                                                                                                                                         |               |         |                                  |
| Chemicals | S2074 | <chem>c1cc2c(c(C(OC)=O)c(C)n2C)cc1O</chem>                                                                                                                              | C13H15NO3     | 233.263 | Mecarbinatate                    |
| Selleck   |       |                                                                                                                                                                         |               |         |                                  |
| Chemicals | S2263 | <chem>[C@H]1(CO)O[C@@H](Oc2ccc(O)cc2)[C@H](O)[C@H](O)[C@@H]1O</chem>                                                                                                    | C12H16O7      | 272.251 | Arbutin                          |
| Selleck   |       |                                                                                                                                                                         |               |         |                                  |
| Chemicals | S2101 | <chem>c1(O(C(CCCCCNC(=N)N)=O)ccc(C(=O)OCC)cc1.O=S(C)(O)=O</chem>                                                                                                        | C17H27N3O7S   | 417.477 | Gabexate Mesylate                |
| Selleck   |       |                                                                                                                                                                         |               |         |                                  |
| Chemicals | S2271 | <chem>c1cc2c(c[n+]3c(c4c(cc5c(OCO5)c4)CC3)c2)c(O)c1OC.[CH]</chem>                                                                                                       | C20H18ClNO4   | 371.814 | Berberine HCl                    |



|           |       |                                                                                                                                                                                        |               |         |                          |
|-----------|-------|----------------------------------------------------------------------------------------------------------------------------------------------------------------------------------------|---------------|---------|--------------------------|
| Selleck   |       | <chem>c1cc2c(Cc1C[C@]3([H])[C@@]2([H])C[C@]4(C)[C@]3([H])C[C@]4(O)C#C)cc1OC</chem>                                                                                                     | C21H26O2      | 310.43  | Mestranol                |
| Chemicals | S2125 |                                                                                                                                                                                        |               |         |                          |
| Selleck   |       | <chem>[C@]1([O])[C@H](O)[C@H](C)O[C@@H](O)C[C@H]2O[C@]1(O)c3c(O)c4c(OC(c5ccc(OC)c(O)c5)=CC4=O)c3[C@H](O)[C@@H](O)[C@@H]2O</chem>                                                       | C28H32O15     | 608.545 | Diosmin                  |
| Chemicals | S2292 |                                                                                                                                                                                        |               |         |                          |
| Selleck   |       | <chem>c1cc2c(Cc1C[C@]([H])([C@H](O)CN[C@]1C@H(O)[C@@]3([H])Oc4c(cc(F)c4)CC3)O2)cc1F.Cl</chem>                                                                                          | C22H26ClF2NO4 | 441.896 | Nebivolol                |
| Chemicals | S1549 |                                                                                                                                                                                        |               |         |                          |
| Selleck   |       |                                                                                                                                                                                        |               |         |                          |
| Chemicals | S1715 | <chem>c1(S(=O)(=O)NC(=O)NC2CCCC2)ccc(CCN(C(=O)c3ncc(C)nc3)cc1</chem>                                                                                                                   | C21H27N5O4S   | 445.535 | Glipizide                |
| Selleck   |       |                                                                                                                                                                                        |               |         |                          |
| Chemicals | S1567 | <chem>c1c(N)c2c(C(=O)N(C3CCC(=O)NC3=O)C2=O)cc1</chem>                                                                                                                                  | C13H11N3O4    | 273.244 | Pomalidomide             |
| Selleck   |       |                                                                                                                                                                                        |               |         |                          |
| Chemicals | S1732 | <chem>c1cc(C(C(Cl)Cl)c2ccccc2Cl)ccc1Cl</chem>                                                                                                                                          | C14H10Cl4     | 320.041 | Mitotane                 |
| Selleck   |       |                                                                                                                                                                                        |               |         |                          |
| Chemicals | S1576 | <chem>c1(ncccc1)NS(=O)(=O)c2ccc(N=Nc3ccc(O)c(C(O)=O)c3)cc2</chem>                                                                                                                      | C18H14N4O5S   | 398.393 | Sulfasalazine            |
| Selleck   |       | <chem>[C@]1(C)[C@@H](O)C(=CO[C@]2(C)C(=O)c(c3c4C(=O)C=C(C)NC5CCN(CC(C)C)CC5)C3=N6)NC(=O)C(C)=CC=C[C@H](C)[C@H](O)[C@@H](C)[C@@H](O)[C@@H](O)C(C(=O)O)c(O2)c(C)c4O</chem>               | C46H62N4O11   | 847.005 | Rifabutin                |
| Chemicals | S1741 |                                                                                                                                                                                        |               |         |                          |
| Selleck   |       | <chem>[C@]([H])([C@@](NC(=O)C(=NO)c1csc(N)n1)([H])C2=O)(SCC(C(=C)C3C(=O)O)N23</chem>                                                                                                   | C14H13N5O5S2  | 395.414 | Cefdinir                 |
| Chemicals | S1605 |                                                                                                                                                                                        |               |         |                          |
| Selleck   |       | <chem>N(C(=O)[C@@H]1NC(C(2nc(N)sc2)=NOC)=O)(C(C)OCO(C(=O)C(C)(C)=O)=O)=O)C(C=Cc3c(C)ncs3)CS4][C@@]14[H]</chem>                                                                         | C25H28N6O7S3  | 620.721 | Cefditoren Pivoxil       |
| Chemicals | S1768 |                                                                                                                                                                                        |               |         |                          |
| Selleck   |       |                                                                                                                                                                                        |               |         |                          |
| Chemicals | S1623 | <chem>C(=O)N[C@@]([H])(CS)C(=O)O)C</chem>                                                                                                                                              | C5H9NO3S      | 163.195 | Acetylcysteine           |
| Selleck   |       | <chem>C1[C@@H](OC(C(C)C)CC)=O)[C@@]2([H])C(C=C[C@H](C)[C@H]2C[C@]3([H])C[C@@H](O)CC(=O)O3)=C[C@@H]1C</chem>                                                                            | C25H38O5      | 418.566 | Simvastatin              |
| Chemicals | S1792 |                                                                                                                                                                                        |               |         |                          |
| Selleck   |       | <chem>C1[C@@](O)(C)[C@H](O[C@H]2OC(C)C[C@@H](N(C)C)[C@H]2O)[C@@H](C)[C@H](O[C@H]3O[C@H](C)[C@@H](O)[C@](C)(OC)C3)[C@@H](C)C(=O)O[C@H](CC)[C@@](C)(O)[C@H](O)[C@@H](C)C(=O)[C@@H</chem> | C37H67NO13    | 733.927 | Erythromycin             |
| Chemicals | S1635 |                                                                                                                                                                                        |               |         |                          |
| Selleck   |       |                                                                                                                                                                                        |               |         |                          |
| Chemicals | S1816 | <chem>c1nc(C(c2ccc(Cl)cc2)CCN(C)C)ccc1.C(=O)(O)C=CC(=O)O</chem>                                                                                                                        | C20H23ClN2O4  | 390.861 | Chlorpheniramine Maleate |
| Selleck   |       |                                                                                                                                                                                        |               |         |                          |
| Chemicals | S1647 | <chem>O1[C@H](n2cnc3c2ncnc3N)[C@H](O)[C@H](O)[C@H]1CO</chem>                                                                                                                           | C10H13N5O4    | 267.241 | Adenosine                |
| Selleck   |       |                                                                                                                                                                                        |               |         |                          |
| Chemicals | S1839 | <chem>c1c(Cl)c(O)c2c(cccn2)c1Cl</chem>                                                                                                                                                 | C9H5Cl2NO     | 214.048 | Chloroxine               |
| Selleck   |       |                                                                                                                                                                                        |               |         |                          |
| Chemicals | S1666 | <chem>C1(=O)N=C(N)C(F)=CN1</chem>                                                                                                                                                      | C4H4FN3O      | 129.092 | Flucytosine              |
| Selleck   |       |                                                                                                                                                                                        |               |         |                          |
| Chemicals | S1866 | <chem>c1cccc(C(OCN(C)C)c2ccccc2)c1.Cl</chem>                                                                                                                                           | C17H22ClNO    | 291.816 | Diphenhydramine HCl      |
| Selleck   |       |                                                                                                                                                                                        |               |         |                          |
| Chemicals | S1679 | <chem>c1(F)cc([C@H](C)C(=O)O)ccc1c2ccccc2</chem>                                                                                                                                       | C15H13FO2     | 244.261 | Flurbiprofen             |
| Selleck   |       |                                                                                                                                                                                        |               |         |                          |
| Chemicals | S1891 | <chem>c1(O)cc(C[C@@](N)(C)C(=O)O)ccc1O</chem>                                                                                                                                          | C10H14N2O4    | 226.229 | Carbidopa                |
| Selleck   |       |                                                                                                                                                                                        |               |         |                          |
| Chemicals | S1704 | <chem>N(C(=O)N([C@@H]1CS[C@H](CO)O)C=C2F)=C2N</chem>                                                                                                                                   | C8H10FN3O3S   | 247.247 | Emtricitabine            |
| Selleck   |       |                                                                                                                                                                                        |               |         |                          |
| Chemicals | S1908 | <chem>c1([N+]([O-])=O)ccc(NC(=O)C(C)C)cc1C(F)F</chem>                                                                                                                                  | C11H11F3N2O3  | 276.212 | Flutamide                |
| Selleck   |       |                                                                                                                                                                                        |               |         |                          |
| Chemicals | S1929 | <chem>c1c(Cl)cc(c2nc(N)nc(N)n2)c(Cl)c1</chem>                                                                                                                                          | C9H7Cl2N5     | 256.091 | Irsogladine              |
| Selleck   |       | <chem>c1(C(N)=NC(=O)OCCCCC)ccc(NCc2nc3c(ccc(C(=O)N(c4ncccc4)CCC(=O)OCC)c3)n2C)cc1</chem>                                                                                               | C34H41N7O5    | 627.733 | Dabigatran Etexilate     |
| Chemicals | S2154 |                                                                                                                                                                                        |               |         |                          |
| Selleck   |       |                                                                                                                                                                                        |               |         |                          |
| Chemicals | S1962 | <chem>N(S(=O)(=O)c1ccc(N)cc1)c2cc(OC)nc(OC)n2</chem>                                                                                                                                   | C12H14N4O4S   | 310.329 | Sulphadimethoxine        |
| Selleck   |       |                                                                                                                                                                                        |               |         |                          |
| Chemicals | S2177 | <chem>c1(Cl)cc(S(=O)(=O)N)cc(S(=O)(=O)N)c1Cl</chem>                                                                                                                                    | C6H6Cl2N2O4S2 | 305.159 | Dichlorophenamide        |
| Selleck   |       | <chem>C1=C[C@@]2(C)C(C[C@]3([H])[C@@]2(Cl)[C@H](O)C[C@@]4(C)[C@@]3([H])C[C@]4H)[C][C@@]4(O)C(c5cccc5)=O)C(=O)CC(=CC1=O</chem>                                                          | C27H30Cl2O6   | 521.429 | Mometasone furoate       |
| Chemicals | S1987 |                                                                                                                                                                                        |               |         |                          |
| Selleck   |       | <chem>c1c(C(C)C)c(C(C)=O)NS(=O)(=O)Oc2c(C(C)C)cccc2C(C)C(C(C)C)cc1C(C)C</chem>                                                                                                         | C29H43NO4S    | 501.721 | Avasimibe                |
| Chemicals | S2187 |                                                                                                                                                                                        |               |         |                          |
| Selleck   |       |                                                                                                                                                                                        |               |         |                          |
| Chemicals | S2012 | <chem>n1(Cc2ccc(OC)cc2)c(c3cc1)cc(C(NO)=O)cc3</chem>                                                                                                                                   | C17H16N2O3    | 296.321 | PCI-34051                |
| Selleck   |       |                                                                                                                                                                                        |               |         |                          |
| Chemicals | S2207 | <chem>C1(Cn2c3c(c(N)ncn3)cn2)=Nc4c(c(C)ccc4)C(=O)N1c5ccccc5C</chem>                                                                                                                    | C22H19N7O     | 397.433 | PIK-293                  |
| Selleck   |       |                                                                                                                                                                                        |               |         |                          |
| Chemicals | S2030 | <chem>c1(F)ccc(C(c2ccc(F)cc2)N3CCN(CC=Cc4cccc4)CC3)cc1.Cl.Cl</chem>                                                                                                                    | C26H28Cl2F2N2 | 477.417 | Flunarizine 2HCl         |
| Selleck   |       | <chem>S(=O)(C)(O)=O.c1cc(C(=O)Nc2ccc(C3(C#N)CCCC3)cc2)c(NCc4cncc4)nc1</chem>                                                                                                           | C25H27N5O4S   | 493.578 | Apatinib                 |
| Chemicals | S2221 |                                                                                                                                                                                        |               |         |                          |

|           |       |                                                                                                                                                                                                                                                                                                                                                                                            |               |                        |                |
|-----------|-------|--------------------------------------------------------------------------------------------------------------------------------------------------------------------------------------------------------------------------------------------------------------------------------------------------------------------------------------------------------------------------------------------|---------------|------------------------|----------------|
| Selleck   |       |                                                                                                                                                                                                                                                                                                                                                                                            |               |                        |                |
| Chemicals | S2043 | Cl.C1(C)(CC(C)(CC2C1)CC3(N)C2)C3                                                                                                                                                                                                                                                                                                                                                           | C12H22ClN     | 215.763                | Memantine HCl  |
| Selleck   |       |                                                                                                                                                                                                                                                                                                                                                                                            |               |                        |                |
| Chemicals | S2232 | c1cc2c(NC(=O)N(CCN3CCC(C(=O)c4ccc(F)cc4)CC3)C2=O)cc1                                                                                                                                                                                                                                                                                                                                       | C22H22FN3O3   | 395.427                | Ketanserin     |
| Selleck   |       |                                                                                                                                                                                                                                                                                                                                                                                            |               |                        |                |
| Chemicals | S2060 | c1(Br)cc(CN(C2CCCCC2)C)c(N)c(Br)c1.Cl                                                                                                                                                                                                                                                                                                                                                      | C14H21Br2ClN2 | 412.591                | Bromhexine HCl |
| Selleck   |       |                                                                                                                                                                                                                                                                                                                                                                                            |               |                        |                |
| Chemicals | S2252 | C1(C(C)=O)=C(O)[C@]2(C)C(Oc3c2c(O)c(C)c(O)c3C(=O)C)=CC1=O<br>[Ca+2].n1(c(c2ccc(F)cc2)c(c3ccccc3)c(C(Nc4ccccc4)=O)c1C(C)C)CC[C@<br>@H](O)C[C@H](O)CC(=O)O-<br>].n5(c(c6ccc(F)cc6)c(c7ccccc7)c(C(Nc8ccccc8)=O)c5C(C)C)CC[C@H](O<br>)C[C@H](O)CC(=O)O[O-]                                                                                                                                     | C18H16O7      | 344.315                | (+)-Usniacin   |
| Selleck   |       |                                                                                                                                                                                                                                                                                                                                                                                            |               |                        |                |
| Chemicals | S2077 | C66H68CaF2N4O10                                                                                                                                                                                                                                                                                                                                                                            | 1155.342      | Atorvastatin Calcium   |                |
| Selleck   |       |                                                                                                                                                                                                                                                                                                                                                                                            |               |                        |                |
| Chemicals | S2264 | [C@]([H])(CC1)([C@@]([H])(C)CC2)[C@@]([C@]([H])(O)[C@@]13C)O[C<br>@H](OC)[C@]4(C)[H])(O3)[C@@]24[H]<br>c1(O)cc2c([C@@H](Cc3cc(OC)c(OC)cc3)[N@@+](C)(CCC(=O)O)CCCC<br>CO C(=O)CC[N@@+ ]4(C)CCc(c5[C@H]4Cc6cc(OC)c(OC)cc6)cc(OC)c(O<br>C)c5)CC2)cc1OC.c7c(S(=O)(=O)[O-])cccc7.c8c(S(=O)(=O)[O-])cccc8<br>O1[C@]2([H])C3([C@@H](O)C(=O)O2)[C@@]([C@H](O)O4)([C@]4([H])C[C<br>@]3(O)C(C)C)C1=O | C16H26O5      | 298.375                | Artemether     |
| Selleck   |       |                                                                                                                                                                                                                                                                                                                                                                                            |               |                        |                |
| Chemicals | S2113 | C65H82N2O18S2                                                                                                                                                                                                                                                                                                                                                                              | 1243.479      | Cisatracurium Besylate |                |
| Selleck   |       |                                                                                                                                                                                                                                                                                                                                                                                            |               |                        |                |
| Chemicals | S2276 | C15H18O8                                                                                                                                                                                                                                                                                                                                                                                   | 326.299       | Bilobalide             |                |
| Selleck   |       |                                                                                                                                                                                                                                                                                                                                                                                            |               |                        |                |
| Chemicals | S2126 | C24H28N2O3                                                                                                                                                                                                                                                                                                                                                                                 | 392.491       | Naftopidil             |                |
| Selleck   |       |                                                                                                                                                                                                                                                                                                                                                                                            |               |                        |                |
| Chemicals | S2295 | C15H10O5                                                                                                                                                                                                                                                                                                                                                                                   | 270.237       | Emodin                 |                |
| Selleck   |       |                                                                                                                                                                                                                                                                                                                                                                                            |               |                        |                |
| Chemicals | S1550 | C19H18N4O2                                                                                                                                                                                                                                                                                                                                                                                 | 334.372       | Pimobendan             |                |
| Selleck   |       |                                                                                                                                                                                                                                                                                                                                                                                            |               |                        |                |
| Chemicals | S1718 | C20H32N5O8P                                                                                                                                                                                                                                                                                                                                                                                | 501.471       | Adefovir Dipivoxil     |                |
| Selleck   |       |                                                                                                                                                                                                                                                                                                                                                                                            |               |                        |                |
| Chemicals | S1568 | C16H13BrF3IN2O4                                                                                                                                                                                                                                                                                                                                                                            | 561.089       | PD318088               |                |
| Selleck   |       |                                                                                                                                                                                                                                                                                                                                                                                            |               |                        |                |
| Chemicals | S1733 | C22H30O5                                                                                                                                                                                                                                                                                                                                                                                   | 374.471       | Methylprednisolone     |                |
| Selleck   |       |                                                                                                                                                                                                                                                                                                                                                                                            |               |                        |                |
| Chemicals | S1577 | C26H21N3O2S                                                                                                                                                                                                                                                                                                                                                                                | 439.529       | Tie2 kinase inhibitor  |                |
| Selleck   |       |                                                                                                                                                                                                                                                                                                                                                                                            |               |                        |                |
| Chemicals | S1742 | C15H14N4O                                                                                                                                                                                                                                                                                                                                                                                  | 266.298       | Nevirapine             |                |
| Selleck   |       |                                                                                                                                                                                                                                                                                                                                                                                            |               |                        |                |
| Chemicals | S1606 | C22H17ClN2                                                                                                                                                                                                                                                                                                                                                                                 | 344.837       | Clotrimazole           |                |
| Selleck   |       |                                                                                                                                                                                                                                                                                                                                                                                            |               |                        |                |
| Chemicals | S1770 | C10H10N4O2S                                                                                                                                                                                                                                                                                                                                                                                | 250.277       | Sulfadiazine           |                |
| Selleck   |       |                                                                                                                                                                                                                                                                                                                                                                                            |               |                        |                |
| Chemicals | S1625 | C20H24O2                                                                                                                                                                                                                                                                                                                                                                                   | 296.403       | Ethinyl Estradiol      |                |
| Selleck   |       |                                                                                                                                                                                                                                                                                                                                                                                            |               |                        |                |
| Chemicals | S1793 | C23H32N2O5                                                                                                                                                                                                                                                                                                                                                                                 | 416.511       | Ramipril               |                |
| Selleck   |       |                                                                                                                                                                                                                                                                                                                                                                                            |               |                        |                |
| Chemicals | S1636 | C47H73NO17                                                                                                                                                                                                                                                                                                                                                                                 | 924.079       | Amphotericin B         |                |
| Selleck   |       |                                                                                                                                                                                                                                                                                                                                                                                            |               |                        |                |
| Chemicals | S1825 | C8H11NO4S2                                                                                                                                                                                                                                                                                                                                                                                 | 249.307       | Erdosteine             |                |
| Selleck   |       |                                                                                                                                                                                                                                                                                                                                                                                            |               |                        |                |
| Chemicals | S1651 | C10H14N2O5                                                                                                                                                                                                                                                                                                                                                                                 | 242.229       | Telbivudine            |                |
| Selleck   |       |                                                                                                                                                                                                                                                                                                                                                                                            |               |                        |                |
| Chemicals | S1840 | C9H16ClN3O2                                                                                                                                                                                                                                                                                                                                                                                | 233.695       | Lomustine              |                |
| Selleck   |       |                                                                                                                                                                                                                                                                                                                                                                                            |               |                        |                |
| Chemicals | S1667 | C8H8Cl3N3O4S2                                                                                                                                                                                                                                                                                                                                                                              | 380.656       | Trichlormethiazide     |                |
| Selleck   |       |                                                                                                                                                                                                                                                                                                                                                                                            |               |                        |                |
| Chemicals | S1869 | C21H24ClNO                                                                                                                                                                                                                                                                                                                                                                                 | 341.874       | Dapoxetine HCl         |                |
| Selleck   |       |                                                                                                                                                                                                                                                                                                                                                                                            |               |                        |                |
| Chemicals | S1680 | C10H20N2S4                                                                                                                                                                                                                                                                                                                                                                                 | 296.539       | Disulfiram             |                |
| Selleck   |       |                                                                                                                                                                                                                                                                                                                                                                                            |               |                        |                |
| Chemicals | S1895 | C24H40N8O4                                                                                                                                                                                                                                                                                                                                                                                 | 504.626       | Dipyridamole           |                |
| Selleck   |       |                                                                                                                                                                                                                                                                                                                                                                                            |               |                        |                |
| Chemicals | S1705 | C21H30O2                                                                                                                                                                                                                                                                                                                                                                                   | 314.462       | Progesterone           |                |
| Selleck   |       |                                                                                                                                                                                                                                                                                                                                                                                            |               |                        |                |
| Chemicals | S1909 | C24H25FNNaO4                                                                                                                                                                                                                                                                                                                                                                               | 433.448       | Fluvastatin Sodium     |                |

|           |       |                                                                                                                                                                                    |                  |         |                              |
|-----------|-------|------------------------------------------------------------------------------------------------------------------------------------------------------------------------------------|------------------|---------|------------------------------|
| Selleck   |       | <chem>[C@@H]1(C)OC(=O)C[C@H](O)C[C@H](O)C[C@H](O)CC[C@H](O)[C@H](O)C[C@]2(O)O[C@H]([C@H](C(O)=O)[C@@H](O)C2)C[C@H](O)[C@H]3O[C@@H](C)[C@H](O)[C@H](N)[C@H]3O)C=CC=CC=CC=CCC</chem> | C47H75NO17       | 926.095 | Nystatin (Fungicidin)        |
| Chemicals | S1934 | <chem>C=CC=C[C@H](C)[C@H](O)[C@H]1C</chem>                                                                                                                                         |                  |         |                              |
| Selleck   |       | <chem>c1cc([C@]2(C(=O)Nc3sc(SCCN4CCCC4)cn3)[C@@H](C5CCCCC5)C2)ccc1S(=O)(=O)C6CC6</chem>                                                                                            | C28H37N3O3S3     | 559.807 | LY2608204                    |
| Chemicals | S2155 |                                                                                                                                                                                    |                  |         |                              |
| Selleck   |       | <chem>C1C(C(C)N)(CC(CC2C3)CC13)C2</chem>                                                                                                                                           | C12H21N          | 179.302 | Rimantadine                  |
| Chemicals | S1964 |                                                                                                                                                                                    |                  |         |                              |
| Selleck   |       | <chem>c(n1c(c2ccc(CN(C)C)cc2)n3)(c3ccc4)c4C(=O)NCC1</chem>                                                                                                                         | C19H20N4O        | 320.388 | AG-14361                     |
| Chemicals | S2178 |                                                                                                                                                                                    |                  |         |                              |
| Selleck   |       | <chem>C(C(=O)NC(=S)N1)=C1CCC</chem>                                                                                                                                                | C7H10N2OS        | 170.232 | Propylthiouracil             |
| Chemicals | S1988 |                                                                                                                                                                                    |                  |         |                              |
| Selleck   |       | <chem>c1(OC2CCN(CC(=O)NC)CC2)cc3c(ncnc3Nc4cccc(Cl)c4F)cc1OC</chem>                                                                                                                 | C23H25ClFN5O3    | 473.928 | AZD8931 (Sapitinib)          |
| Chemicals | S2192 |                                                                                                                                                                                    |                  |         |                              |
| Selleck   |       | <chem>C(c1cnc2c(c[nH]2)c1OCCCC)(c3c(F)cc(C)cc3F)=O</chem>                                                                                                                          | C18H17F2N3O2     | 345.343 | BMS-265246                   |
| Chemicals | S2014 |                                                                                                                                                                                    |                  |         |                              |
| Selleck   |       | <chem>C1C[C@@]2(C)C(C[C@]3([H])[C@@]2([H])CC[C@@]4(C)[C@@]3([H])CCC4=O)=C(O)C1=O</chem>                                                                                            | C19H26O3         | 302.408 | Formestane                   |
| Chemicals | S2208 |                                                                                                                                                                                    |                  |         |                              |
| Selleck   |       | <chem>C(Cn1cncc1)(c2c(Cl)cc(Cl)cc2)OCc3ccc(Sc4ccccc4)cc3.[N+](O)(=O)[O-]</chem>                                                                                                    | C24H21Cl2N3O4S   | 518.412 | Fenticonazole Nitrate        |
| Chemicals | S2031 |                                                                                                                                                                                    |                  |         |                              |
| Selleck   |       | <chem>c1(onc(C(=O)N)n1)[C@@H](CC(=O)NO)CCCC2CCCCC2</chem>                                                                                                                          | C15H24N4O4       | 324.375 | UK 383367                    |
| Chemicals | S2224 |                                                                                                                                                                                    |                  |         |                              |
| Selleck   |       | <chem>C1(c2c(cccc2)C=Cc3c1cccc3)=C4CCN(C)CC4.Cl</chem>                                                                                                                             | C21H22ClN        | 323.859 | Cyproheptadine HCl           |
| Chemicals | S2044 |                                                                                                                                                                                    |                  |         |                              |
| Selleck   |       | <chem>[C@H]1(CC)N(C(C)C)c2c(cnc(Nc3c(OC)cc(C(=O)N)[C@H]4CC[C@H](N5C CN(CC6CC6)CC5)CC4)cc3)n2)N(C)C1=O</chem>                                                                       | C34H50N8O3       | 618.813 | Volasertib (BI 6727)         |
| Chemicals | S2235 |                                                                                                                                                                                    |                  |         |                              |
| Selleck   |       | <chem>C1[C@@H](O C1[C@@H](C)CC)=O)[C@@]2([H])C(C=C[C@H](C)[C@H]2 CC[C@@H]3C[C@@H](O)CC(=O)O3)=C[C@@H]1C</chem>                                                                     | C24H36O5         | 404.54  | Lovastatin                   |
| Chemicals | S2061 |                                                                                                                                                                                    |                  |         |                              |
| Selleck   |       | <chem>c1c2c(c(CCCC(=O)O)c[nH]2)ccc1</chem>                                                                                                                                         | C12H13NO2        | 203.237 | 3-Indolebutyric acid (IBA)   |
| Chemicals | S2253 |                                                                                                                                                                                    |                  |         |                              |
| Selleck   |       | <chem>NS(=O)(=O)NC(=N)CCSCc1nc(NC(=N)N)sc1</chem>                                                                                                                                  | C8H15N7O2S3      | 337.445 | Famotidine                   |
| Chemicals | S2078 |                                                                                                                                                                                    |                  |         |                              |
| Selleck   |       | <chem>[C@]([H])(CC1)([C@@]([H])(C)CC2)[C@@]([C@]([H])(O[C@@]13C)O[C@H](OC(CCC(=O)O)=O)[C@]4(C)[H])(OO3)[C@@]24[H]</chem>                                                           | C19H28O8         | 384.421 | Artesunate                   |
| Chemicals | S2265 |                                                                                                                                                                                    |                  |         |                              |
| Selleck   |       | <chem>c1(NS(=O)(=O)C(=O)cc2c(cc(CCCC)c2C(c3ccc(OC(CCN(CCCC)CCCC)cc3)=O)cc1.Cl</chem>                                                                                               | C31H45ClN2O5S    | 593.217 | Dronedarone HCl              |
| Chemicals | S2114 |                                                                                                                                                                                    |                  |         |                              |
| Selleck   |       | <chem>c1cc(C=CC(=O)O)cc(O)c1O</chem>                                                                                                                                               | C9H8O4           | 180.157 | Caffeic Acid                 |
| Chemicals | S2277 |                                                                                                                                                                                    |                  |         |                              |
| Selleck   |       | <chem>c1(OC)ccc([C@@H]2CC(=O)NC2)cc1OC3CCCC3</chem>                                                                                                                                | C16H21NO3        | 275.343 | S- (+)-Rolipram              |
| Chemicals | S2127 |                                                                                                                                                                                    |                  |         |                              |
| Selleck   |       | <chem>C1C[C@@]2(C)[C@@]([H])(CC[C@]3(C)[C@]2([H])C(=O)C=C4[C@@]3(C)CC[C@]5(C)[C@@]4([H])C[C@]([C(=O)O)(C)CC5)C(C)[C@@]1([H])</chem>                                                | C30H46O4         | 470.684 | Enoxolone                    |
| Chemicals | S2296 |                                                                                                                                                                                    |                  |         |                              |
| Selleck   |       | <chem>c1(CO)cc(c2ccc3c(nc(N4CCOC[C@@H]4)nc3N5CCOC[C@@H]5C)n2)cc c1OC</chem>                                                                                                        | C25H31N5O4       | 465.545 | AZD8055                      |
| Chemicals | S1555 |                                                                                                                                                                                    |                  |         |                              |
| Selleck   |       | <chem>[C@H]1(CO)O[C@@H](N2C=CC(N)=NC2=O)CC1</chem>                                                                                                                                 | C9H13N3O3        | 211.218 | Zalcitabine                  |
| Chemicals | S1719 |                                                                                                                                                                                    |                  |         |                              |
| Selleck   |       | <chem>C1Sc2c(cc(C#Cc3ccc(C(OC)=O)cn3)cc2)C(C)(C)C1</chem>                                                                                                                          | C21H21NO2S       | 351.462 | Tazarotene                   |
| Chemicals | S1569 |                                                                                                                                                                                    |                  |         |                              |
| Selleck   |       | <chem>C1(C(Nc2sc(C)cn2)=O)=C(O)c3c(cccc3)S(=O)(=O)N1C</chem>                                                                                                                       | C14H13N3O4S2     | 351.401 | Meloxicam                    |
| Chemicals | S1734 |                                                                                                                                                                                    |                  |         |                              |
| Selleck   |       | <chem>c1c2c(ccnc2)c(S(=O)(=O)NCCNCC=Cc3ccc(Br)cc3)cc1.Cl.Cl</chem>                                                                                                                 | C20H22BrCl2N3O2S | 519.283 | H 89 2HCl                    |
| Chemicals | S1582 |                                                                                                                                                                                    |                  |         |                              |
| Selleck   |       | <chem>c1cc(C(O)=O)cn1</chem>                                                                                                                                                       | C6H5NO2          | 123.109 | Nicotinic Acid               |
| Chemicals | S1744 |                                                                                                                                                                                    |                  |         |                              |
| Selleck   |       | <chem>c1c2c(c(CCN(C)C)c[nH]2)cc(Cn3ncnc3)c1.c4cccc(C(=O)O)c4</chem>                                                                                                                | C22H25N5O2       | 391.466 | Rizatriptan Benzoate         |
| Chemicals | S1607 |                                                                                                                                                                                    |                  |         |                              |
| Selleck   |       | <chem>C(C(=O)N)(C(=O)[C@]1(O)[C@@]([H])([C@@H](O)[C@@]2([H])C(=O)c3c(cccc3O)[C@@]2(C)O)C1=O)[C@@H]4N(C)C=C4O</chem>                                                                | C22H24N2O9       | 460.434 | Oxytetracycline (Terramycin) |
| Chemicals | S1773 |                                                                                                                                                                                    |                  |         |                              |
| Selleck   |       | <chem>c1cc2c(ccc([C@H](C)C(=O)[O-])c2)cc1O.C.[Na+]</chem>                                                                                                                          | C14H13NaO3       | 252.241 | Naproxen                     |
| Chemicals | S1626 |                                                                                                                                                                                    |                  |         |                              |
| Selleck   |       | <chem>c1cc(C(=O)c2ccc(OC(C)(C)C(=O)OC(C)C)cc2)ccc1Cl</chem>                                                                                                                        | C20H21ClO4       | 360.831 | Fenofibrate                  |
| Chemicals | S1794 |                                                                                                                                                                                    |                  |         |                              |
| Selleck   |       | <chem>c1cc(S(=O)(=O)N(C(C)C)C[C@@H](O)[C@H](Cc2ccccc2)NC(=O)O)[C@H]3CCOC3)ccc1N</chem>                                                                                             | C25H35N3O6S      | 505.627 | Amprenavir                   |
| Chemicals | S1639 |                                                                                                                                                                                    |                  |         |                              |
| Selleck   |       | <chem>c1(N)cc(C(=O)OCCN(CC)CC)ccc1OCCC.Cl</chem>                                                                                                                                   | C16H27ClN2O3     | 330.85  | Proparacaine HCl             |
| Chemicals | S1828 |                                                                                                                                                                                    |                  |         |                              |
| Selleck   |       | <chem>c1cc(O)ccc1OCc2ccccc2</chem>                                                                                                                                                 | C13H12O2         | 200.233 | Monobenzene                  |
| Chemicals | S1652 |                                                                                                                                                                                    |                  |         |                              |

|           |       |                                                                  |               |         |                           |
|-----------|-------|------------------------------------------------------------------|---------------|---------|---------------------------|
| Selleck   |       | C1C[C@@]2(C)[C@]([H])(C[C@H](O)[C@]3([H])[C@@]2([H])CC[C@@       |               |         |                           |
| Chemicals | S1843 | J4(C)[C@@]3([H])CC[C@]4([C@H](C)CCC(=O)O)[H])C[C@@H]1O           | C24H40O4      | 392.572 | Chenodeoxycholic Acid     |
| Selleck   |       | C1=C[C@@]2(C)C(C[C@]3([H])[C@@]2([H])[C@H](O)C[C@@]4(C)[C        |               |         |                           |
| Chemicals | S1669 | @]3([H])CC[C@@]4(OC(=O)OCC(=O)OCC)=CC1=O                         | C24H31ClO7    | 466.952 | Loteprednol etabonate     |
| Selleck   |       |                                                                  |               |         |                           |
| Chemicals | S1876 | N1C(N)=Nc2c(ncn2COCCOC(=O)[C@@H](N)C(C)C)C1=O.Cl                 | C13H21ClN6O4  | 360.797 | Valaciclovir HCl          |
| Selleck   |       |                                                                  |               |         |                           |
| Chemicals | S1685 | c1(N)ccc(S(=O)(=O)N)cc1                                          | C6H8N2O2S     | 172.205 | Sulfanilamide             |
| Selleck   |       |                                                                  |               |         |                           |
| Chemicals | S1896 | N(O)C(=O)N                                                       | CH4N2O2       | 76.055  | Hydroxyurea               |
| Selleck   |       |                                                                  |               |         |                           |
| Chemicals | S1706 | N(C(=O)N([C@@H]1CS[C@H](CO)O1)C=C2)=C2N                          | C8H11N3O3S    | 229.256 | Lamivudine                |
| Selleck   |       |                                                                  |               |         |                           |
| Chemicals | S1910 | c1c(Cl)ccc(C(Cn2cncc2)OCc3c(Cl)sc3)c1Cl                          | C16H13Cl3N2OS | 387.711 | Tioconazole               |
| Selleck   |       |                                                                  |               |         |                           |
| Chemicals | S1937 | c1c(C(=O)NN)ccnc1                                                | C6H7N3O       | 137.139 | Isoniazid                 |
| Selleck   |       |                                                                  |               |         |                           |
| Chemicals | S2156 | c1nc(C(=O)Nc2cc([C@]3(CO)C4[C@@]4([H])CSC(N)=N3)c(F)cc2)ccc1F    | C18H16F2N4O2S | 390.407 | LY2886721                 |
| Selleck   |       |                                                                  |               |         |                           |
| Chemicals | S1965 | C1NC(=O)C(c2ccccc2)(CC)C(=O)N1                                   | C12H14N2O2    | 218.252 | Primidone                 |
| Selleck   |       |                                                                  |               |         |                           |
| Chemicals | S2179 | c1c(CN2CCOCC2)c3n(c(Cc4c(F)cc(Cl)cc4)c(C)n3)nc1Nc5cc(C)n[nH]5    | C23H25ClFN7O  | 469.942 | LY2784544                 |
| Selleck   |       | C1=C[C@@]2(C)C([C@@H](F)C[C@]3([H])[C@@]2(F)[C@H](O)C[C@@        |               |         |                           |
| Chemicals | S1992 | J4(C)[C@@]3([H])C[C@@H](C)[C@@]4(OC(=O)CC(C=O)SCF)=CC1=O         | C25H31F3O5S   | 500.571 | Fluticasone propionate    |
| Selleck   |       | C1CN(Cc2ccc3c(n(c4sc(C(N)=O)c(O[C@@H](c5c(C(F)(F)F)cccc5)C)c4)cn |               |         |                           |
| Chemicals | S2193 | 3)c2)CCN1C                                                       | C27H28F3N5O2S | 543.604 | GSK461364                 |
| Selleck   |       | c1c(NC(=O)CC[S+])(C(C)ccc(OCC(OCCC)O)c1.c2C(S([O-                |               |         |                           |
| Chemicals | S2015 | ])(=O)=O)ccc(C)c2                                                | C23H33NO7S2   | 499.641 | Suplatast Tosylate        |
| Selleck   |       |                                                                  |               |         |                           |
| Chemicals | S2214 | c1c(F)c(Nc2[nH]c(C)c2)nc(N[C@@H](C)c3ccc(F)cc3)c1C#N             | C18H16F2N6    | 354.357 | AZ 960                    |
| Selleck   |       |                                                                  |               |         |                           |
| Chemicals | S2032 | c1(ccc(Cl)cc1)C(=O)NC(C(=O)=O)CC(c2c(cccc2)NC3=O)=C3             | C19H15ClN2O4  | 370.786 | Rebamipide                |
| Selleck   |       |                                                                  |               |         |                           |
| Chemicals | S2225 | c1cc(S(=O)(=O)N[C@@H](CCCNC(N)=N)C(=O)OC)ccc1C                   | C14H22N4O4S   | 342.414 | TAME                      |
| Selleck   |       |                                                                  |               |         |                           |
| Chemicals | S2045 | N1C(=O)N([C@H]2[C@@H](O)[C@H](O)[C@@H](C)O2)C=C(F)C1=O           | C9H11FN2O5    | 246.192 | Doxifluridine             |
| Selleck   |       |                                                                  |               |         |                           |
| Chemicals | S2238 | c1cc(COCc2cc3c(c4c(cc(C(O)C)cc4)C(=O)O3)cc2OC)ccc1OC             | C24H22O6      | 406.428 | Palomid 529 (P529)        |
| Selleck   |       |                                                                  |               |         |                           |
| Chemicals | S2062 | C(O)(=O)CNC(=O)C(S)C                                             | C5H9NO3S      | 163.195 | Tiopronin                 |
| Selleck   |       |                                                                  |               |         | 4-Methylumbelliferone (4- |
| Chemicals | S2256 | c1c2c(C(C)=CC(=O)O2)ccc1O                                        | C10H8O3       | 176.169 | MU)                       |
| Selleck   |       | c1c(OC)c(OC)cc2c1C[C@H]2CN(C)CCCN3C(=O)Cc4c(cc(OC)c(OC)c4)CC     |               |         |                           |
| Chemicals | S2086 | 3.Cl                                                             | C27H37ClN2O5  | 505.046 | Ivabradine HCl            |
| Selleck   |       | [C@@H]1(O)C[C@@]2(C)[C@@]([H])(CC[C@]3(C)[C@@]2([H])CC=C4[       |               |         |                           |
| Chemicals | S2266 | C@@]3(C)CC[C@]5(C(=O)O)[C@]4([H])[C@H](C)[C@H](C)CC5)[C@](C)     | C30H48O5      | 488.699 | Asiatic Acid              |
| Selleck   |       | (CO)[C@H]1O                                                      |               |         |                           |
| Chemicals | S2116 | C(=O)(c1cccc1c2cccc2)Nc3ccc(C(=O)N4CCc5c([nH]c(C)n5)c6c4cccc6)c  | C32H27ClN4O2  | 535.035 | Conivaptan HCl            |
| Selleck   |       | c3.Cl                                                            |               |         |                           |
| Chemicals | S2281 | c1c(O)cc2c(C(=O)C=C(c3ccccc3)O2)c1O                              | C15H10O4      | 254.238 | Chrysin                   |
| Selleck   |       |                                                                  |               |         |                           |
| Chemicals | S2128 | c1(c2ccc(O)cc2)c(C)c(c3n1Cc4ccc(OCCN5CCCCC5)cc4)cc(O)cc3.Cl      | C30H35ClN2O3  | 507.063 | Bazedoxifene HCl          |
| Selleck   |       |                                                                  |               |         |                           |
| Chemicals | S2298 | c(C(=O)C(O)=C(c1ccc(O)c(O)c1)O2)(ccc(O)c3)c23                    | C15H10O6      | 286.236 | Fisetin                   |
| Selleck   |       |                                                                  |               |         |                           |
| Chemicals | S1556 | c1cc(S(=O)(Nc2scnn2)=O)ccc1CCCCCCCCCCCC                          | C20H31N3O2S2  | 409.609 | PHT-427                   |
| Selleck   |       |                                                                  |               |         |                           |
| Chemicals | S1721 | n1c(Sc2n(C)cn2[N+])([O-])=O)c3c(nc[nH]3)nc1                      | C9H7N7O2S     | 277.263 | Azathioprine              |
| Selleck   |       | c1c2c(Sc3c(cccc3C(OC(N4CCOCC4)=CC5=O)=C5)C2)ccc1NC(=O)CN6C[      |               |         |                           |
| Chemicals | S1570 | C@@H](C)O[C@@H](C)C6                                             | C30H33N3O5S   | 547.665 | KU-60019                  |
| Selleck   |       |                                                                  |               |         |                           |
| Chemicals | S1735 | SCCS(=O)(=O)[O-].[Na+]                                           | C2H5NaO3S2    | 164.179 | Mesna                     |
| Selleck   |       |                                                                  |               |         |                           |
| Chemicals | S1590 | c1c(O)cc(OCc2c3c([nH]c(c4cc(N)ccc4)c3)ncn2)cc1                   | C18H14N4O2    | 318.329 | TWS119                    |
| Selleck   |       |                                                                  |               |         |                           |
| Chemicals | S1756 | c1(F)cc2c(N(CC)C=C(C(=O)O)C2=O)nc1N3CCNCC3                       | C15H17FN4O3   | 320.319 | Enoxacin                  |

|           |       |                                                                                                                                                    |                |         |                                 |
|-----------|-------|----------------------------------------------------------------------------------------------------------------------------------------------------|----------------|---------|---------------------------------|
| Selleck   |       |                                                                                                                                                    |                |         |                                 |
| Chemicals | S1610 | <chem>c1(Cl)cc2c(C(=O)N(c3c(C)cccc3)C(C)N2)cc1S(N)(=O)=O</chem>                                                                                    | C16H16ClN3O3S  | 365.835 | Metolazone                      |
| Selleck   |       |                                                                                                                                                    |                |         |                                 |
| Chemicals | S1777 | <chem>c1c(C(N)=S)cc(CC)nc1</chem>                                                                                                                  | C8H10N2S       | 166.243 | Ethionamide                     |
| Selleck   |       |                                                                                                                                                    |                |         |                                 |
| Chemicals | S1627 | <chem>c1c(OC(=O)C)c(C(=O)Nc2sc([N+])([O-])=O)cn2)ccc1</chem>                                                                                       | C12H9N3O5S     | 307.282 | Nitazoxanide                    |
| Selleck   |       |                                                                                                                                                    |                |         |                                 |
| Chemicals | S1799 | <chem>c1c(C)c(NC(=O)CN2CCN(CC(O)COc3c(OC)cccc3)CC2)c(C)cc1</chem>                                                                                  | C24H33N3O4     | 427.537 | Ranolazine                      |
| Selleck   |       |                                                                                                                                                    |                |         |                                 |
| Chemicals | S1641 | <chem>c1(Cl)cc2c(S(=O)(=O)NC=N2)cc1S(=O)(=O)N</chem>                                                                                               | C7H6ClN3O4S2   | 295.723 | Chlorothiazide                  |
| Selleck   |       |                                                                                                                                                    |                |         |                                 |
| Chemicals | S1830 | <chem>S(=O)(c1cccc1)c2ccc3c([nH])c(NC(=O)OC)n3)c2</chem>                                                                                           | C15H13N3O3S    | 315.347 | Oxfendazole                     |
| Selleck   |       |                                                                                                                                                    |                |         |                                 |
| Chemicals | S1653 | <chem>C1C(C)(C)C(C=CC(C)=CC=CC(C)=CC(=O)O)=C(C)CC1</chem>                                                                                          | C20H28O2       | 300.435 | Tretinoin                       |
| Selleck   |       |                                                                                                                                                    |                |         |                                 |
| Chemicals | S1847 | <chem>c1cc(Cl)ccc1[C@@](C)(c2ccccc2)OCC[C@H]3CCCN3C.O.C(=O)C=CC(=O)O</chem>                                                                        | C25H30ClNO5    | 459.962 | Clemastine Fumarate             |
| Selleck   |       |                                                                                                                                                    |                |         |                                 |
| Chemicals | S1671 | <chem>NCCCCC(=O)O</chem>                                                                                                                           | C6H13NO2       | 131.173 | ?6-??-?Aminocaproic acid        |
| Selleck   |       |                                                                                                                                                    |                |         |                                 |
| Chemicals | S1878 | <chem>N1C(=O)c2c(n(CO C(CO)CO)cn2)N=C1N</chem>                                                                                                     | C9H13N5O4      | 255.231 | Ganciclovir                     |
| Selleck   |       |                                                                                                                                                    |                |         |                                 |
| Chemicals | S1689 | <chem>C1=C[C@@]2(C)C(C(C[C@@]3([H])(C@@]2([H])C(=O)C[C@@]4(C)[C@@]3([H])C[C@@H]4C(C)=O)C[C@@H]1O)=CC1=O</chem>                                     | C22H28O5       | 372.455 | Meprednisone                    |
| Selleck   |       |                                                                                                                                                    |                |         |                                 |
| Chemicals | S1899 | <chem>c1cc(C(=O)N)cnc1</chem>                                                                                                                      | C6H6N2O        | 122.125 | Nicotinamide (Vitamin B3)       |
| Selleck   |       |                                                                                                                                                    |                |         |                                 |
| Chemicals | S1708 | <chem>c1(Cl)cc2c(S(=O)(=O)NCN2)cc1S(=O)(=O)N</chem>                                                                                                | C7H8ClN3O4S2   | 297.739 | Hydrochlorothiazide             |
| Selleck   |       |                                                                                                                                                    |                |         |                                 |
| Chemicals | S1914 | <chem>C1C[C@@]2(C)C(=CC[C@@]3([H])(C@@]2([H])CC[C@@]4(C)[C@@]3([H])CC[C@@H]4C(C)=O)C[C@@H]1O</chem>                                                | C21H32O2       | 316.478 | Pregnenolone                    |
| Selleck   |       |                                                                                                                                                    |                |         |                                 |
| Chemicals | S1940 | <chem>c(N1[C@@]([H])(C)CO2)(c2c(N3CCN(C)CC3)c(F)c4)c4C(=O)C(C(O)=O)=C1</chem>                                                                      | C18H20FN3O4    | 361.368 | Levofloxacin                    |
| Selleck   |       |                                                                                                                                                    |                |         |                                 |
| Chemicals | S2158 | <chem>c1c2c(c(C=Cc3ccc(C(N4CCNCC4)=O)cc3)n([nH]2)ccc1</chem>                                                                                       | C20H20N4O      | 332.399 | KW-2449                         |
| Selleck   |       |                                                                                                                                                    |                |         |                                 |
| Chemicals | S1969 | <chem>C(C(=O)Nc1c(C)cccc1C)N2CCCC2=O</chem>                                                                                                        | C14H18N2O2     | 246.305 | Nefiracetam                     |
| Selleck   |       |                                                                                                                                                    |                |         |                                 |
| Chemicals | S2180 | <chem>c1c(Cl)c(C(=O)NCC(=O)N[C@@H](CC(C)C)B(O)O)cc(Cl)c1</chem>                                                                                    | C14H19BCl2N2O4 | 361.029 | MLN2238                         |
| Selleck   |       |                                                                                                                                                    |                |         |                                 |
| Chemicals | S2001 | <chem>c1cc(Cl)c(F)c(Cc2c(OC)cc3c(C(=O)C(C(=O)O)=CN3[C@@H](CO)C(C)C)c2)c1</chem>                                                                    | C23H23ClFNO5   | 447.884 | Elvitegravir (GS-9137, JTK-303) |
| Selleck   |       |                                                                                                                                                    |                |         |                                 |
| Chemicals | S2195 | <chem>n1c(c2ccc(NC(NCC)=O)c(OC)c2)nc(N[C@@H](CCC)c3cnccc3)c(C)c1</chem>                                                                            | C24H30N6O2     | 434.534 | CYT997 (Lexibulin)              |
| Selleck   |       |                                                                                                                                                    |                |         |                                 |
| Chemicals | S2021 | <chem>c1cc(C2N(C)C(=O)CCS2(=O)=O)ccc1Cl</chem>                                                                                                     | C11H12ClNO3S   | 273.736 | Chlormezanone                   |
| Selleck   |       |                                                                                                                                                    |                |         |                                 |
| Chemicals | S2215 | <chem>c1(F)cc(CC(C[NiC@H](C(=O)N[C@@H](c2ccccc2)C(OC(C)C)C)=O)C)=O)c c(F)c1</chem>                                                                 | C23H26F2N2O4   | 432.46  | DAPT (GSI-IX)                   |
| Selleck   |       |                                                                                                                                                    |                |         |                                 |
| Chemicals | S2035 | <chem>c1cc(C=C(C)C=C2C(=O)N(CC(=O)O)C(=S)S2)ccc1</chem>                                                                                            | C15H13NO3S2    | 319.399 | Epalrestat                      |
| Selleck   |       |                                                                                                                                                    |                |         |                                 |
| Chemicals | S2226 | <chem>c1c(F)c2c(N=C([C@H](CC)Nc3ncnc4c3nc[nH]4)N(c5ccccc5)C2=O)cc1</chem>                                                                          | C22H18FN7O     | 415.423 | CAL-101 (Idelalisib, GS-1101)   |
| Selleck   |       |                                                                                                                                                    |                |         |                                 |
| Chemicals | S2047 | <chem>N(C(=O)C1=C(C)O)c2c(cc(Cl)s2)S(=O)(=O)N1C)c3cccn3</chem>                                                                                     | C13H10ClN3O4S2 | 371.819 | Lornoxicam                      |
| Selleck   |       |                                                                                                                                                    |                |         |                                 |
| Chemicals | S2239 | <chem>[C@@H]1(CSc2nc(c3ccccc3)c(c4ccccc4)o2)O[C@H](c5ccc(NC(CCCCCC(=O)NO)=O)cc5)O[C@H](c6ccc(CO)cc6)C1</chem>                                      | C41H43N3O7S    | 721.861 | Tubacin                         |
| Selleck   |       |                                                                                                                                                    |                |         |                                 |
| Chemicals | S2064 | <chem>N1(CCCC(NC)C1)c2c(F)cc3c(N(C4CC4)C=C(C(O)=O)C3=O)c2OC</chem>                                                                                 | C20H24FN3O4    | 389.421 | Balofloxacin                    |
| Selleck   |       |                                                                                                                                                    |                |         |                                 |
| Chemicals | S2259 | <chem>c(C(=O)c1c(cccc1O)C2=O)(c(O)cc(CO)c3)c23</chem>                                                                                              | C15H10O5       | 270.237 | Aloe-emodin                     |
| Selleck   |       |                                                                                                                                                    |                |         |                                 |
| Chemicals | S2087 | <chem>c1(OC(=O)N(CC)C)cc([C@H](C)N(C)C)ccc1.O.C(=O)[C@H](O)[C@@H](O)C(=O)O</chem>                                                                  | C18H28N2O8     | 400.424 | Rivastigmine Tartrate           |
| Selleck   |       |                                                                                                                                                    |                |         |                                 |
| Chemicals | S2267 | <chem>O=[N+])([O-])c1[nH]ccn1</chem>                                                                                                               | C3H3N3O2       | 113.075 | Azomycin                        |
| Selleck   |       |                                                                                                                                                    |                |         |                                 |
| Chemicals | S2118 | <chem>CS(Nc1ccc(C(O)CCCN(CC)CCCCCCC)cc1)(=O)=O.C(O)(=O)C=CC(O)=O</chem>                                                                            | C44H76N4O10S2  | 885.225 | Ibutilide Fumarate              |
| Selleck   |       |                                                                                                                                                    |                |         |                                 |
| Chemicals | S2282 | <chem>c1cccc2c1c([C@@H](O)[C@]3([H])CC([C@@]([H])(C=C)CN34)CC4)ccn2</chem>                                                                         | C19H22N2O      | 294.391 | Cinchonidine                    |
| Selleck   |       |                                                                                                                                                    |                |         |                                 |
| Chemicals | S2130 | <chem>OS(=O)(=O)O.O.C(=O)O[C@H]1C[C@@]([H])(N(C)[C@@]2([H])C1)CC2)C(CO)c3ccccc3.C(=O)O[C@H]4C[C@@]([H])(N(C)[C@@]5([H])C4)CC5)C(CO)c6ccccc6</chem> | C34H50N2O11S   | 694.833 | Atropine                        |

|         |           |       |                                                                                                                                                                                                                                                                                                                                                                                                                            |                 |          |                      |
|---------|-----------|-------|----------------------------------------------------------------------------------------------------------------------------------------------------------------------------------------------------------------------------------------------------------------------------------------------------------------------------------------------------------------------------------------------------------------------------|-----------------|----------|----------------------|
| Selleck | Chemicals | S2299 | <chem>c(C(=O)C(c1ccc(OC)cc1)=CO2)(ccc(O)c3)c23</chem>                                                                                                                                                                                                                                                                                                                                                                      | C16H12O4        | 268.264  | Formononetin         |
| Selleck | Chemicals | S1557 | <chem>c1(OC)cc2c(ncnc2Oc3cc(Cl)c(NC(NCCC)=O)cc3)cc1OC</chem>                                                                                                                                                                                                                                                                                                                                                               | C20H21ClN4O4    | 416.858  | KRN 633              |
| Selleck | Chemicals | S1723 | <chem>c1cc2c(c(CC(=O)O)c(C)n2C(=O)c3ccc(Cl)cc3)cc1OC</chem>                                                                                                                                                                                                                                                                                                                                                                | C19H16ClNO4     | 357.788  | Indomethacin         |
| Selleck | Chemicals | S1572 | <chem>c1(NCc2ccccc2)n3c(c(C(C)C)n3)nc(NCCCCCN)c1.Cl</chem>                                                                                                                                                                                                                                                                                                                                                                 | C22H33ClN6      | 416.991  | BS-181 HCl           |
| Selleck | Chemicals | S1736 | <chem>c1c(OC)c(OC(CO(C(=O)N)O)ccc1</chem>                                                                                                                                                                                                                                                                                                                                                                                  | C11H15NO5       | 241.241  | Methocarbamol        |
| Selleck | Chemicals | S1593 | <chem>n1n(c2ccc(OC)c2)c3c(CCN(c4ccc(N5CCCCC5=O)cc4)C3=O)c1C(=O)N</chem><br><chem>c1(C=NN2CCN(C3CCCC3)CC2)c(O)c(c(C(=O)[C@]4(C)O5)c56)c(c(O)c6C)</chem><br><chem>c(O)c1NC(=O)C(C)=CC=C[C@H](C)[C@H](O)[C@H](C)[C@H](O)[C</chem><br><chem>@H](C)[C@H](O C(C)=O)[C@H](C)[C@H](O)C=CO4</chem>                                                                                                                                  | C25H25N5O4      | 459.497  | Apixaban             |
| Selleck | Chemicals | S1760 | <chem>c1cc(OCNC[C@@H](Cc2cc(C(=O)N)c3c(CCN3CCCO)c2)C)c(OC(F)(F)F)</chem><br><chem>cc1</chem>                                                                                                                                                                                                                                                                                                                               | C47H64N4O12     | 877.031  | Rifapentine          |
| Selleck | Chemicals | S1613 | <chem>c1cc(OCNC[C@@H](Cc2cc(C(=O)N)c3c(CCN3CCCO)c2)C)c(OC(F)(F)F)</chem><br><chem>cc1</chem>                                                                                                                                                                                                                                                                                                                               | C25H32F3N3O4    | 495.534  | Silodosin            |
| Selleck | Chemicals | S1778 | <chem>N1C(=O)C(C(F)(F)F)=CN([C@H]2O[C@H](CO)[C@@H](O)C2)C1=O</chem><br><chem>C1=C[C@@@]2(C)C(C)C[C@]3([H])[C@@]2(F)[C@H](O)C[C@@]4(C)[C@</chem><br><chem>@]3([H])C[C@@H]5[C@H]4(C(=O)CO)O C(C)(C)O5)=CC1=O</chem>                                                                                                                                                                                                          | C10H11F3N2O5    | 296.2    | Trifluridine         |
| Selleck | Chemicals | S1628 | <chem>[C@@H]1(O)[C@H](CO)O[C@@H](n2c(N)c(C(N)=O)nc2)[C@@H]1O</chem><br><chem>C1C[C@]2(C)[C@]([H])([C]C@H(O)[C@]3([H])[C@@]2([H])CC[C@@]4</chem><br><chem>(C)[C@@]3([H])CC[C@@]4([H])[C@@H](CCC(=O)O)C)C[C@H]1O</chem>                                                                                                                                                                                                      | C9H14N4O5       | 258.231  | Acadesine            |
| Selleck | Chemicals | S1643 | <chem>[C@@H]1(O)[C@H](CO)O[C@@H](n2c(N)c(C(N)=O)nc2)[C@@H]1O</chem><br><chem>C1C[C@]2(C)[C@]([H])([C]C@H(O)[C@]3([H])[C@@]2([H])CC[C@@]4</chem><br><chem>(C)[C@@]3([H])CC[C@@]4([H])[C@@H](CCC(=O)O)C)C[C@H]1O</chem>                                                                                                                                                                                                      | C24H40O4        | 392.572  | Ursodiol             |
| Selleck | Chemicals | S1831 | <chem>c1([nH]c2c3ccccc2c3c(OC(C)CNCCOc4c(OC)cccc4)ccc1</chem><br><chem>c1cc([C@H](O)CC[C@@H]2[C@H](c3ccc(O)cc3)N(c4ccc(F)cc4)C2=O)</chem><br><chem>ccc1F</chem>                                                                                                                                                                                                                                                            | C24H26N2O4      | 406.474  | Carvedilol           |
| Selleck | Chemicals | S1655 | <chem>c1cc([C@H](O)CC[C@@H]2[C@H](c3ccc(O)cc3)N(c4ccc(F)cc4)C2=O)</chem><br><chem>ccc1F</chem>                                                                                                                                                                                                                                                                                                                             | C24H21F2NO3     | 409.425  | Ezetimibe            |
| Selleck | Chemicals | S1848 | <chem>c1(OC)cc(C=CC(=O)C=O)C=Cc2cc(OC)c(O)cc2)ccc1O</chem>                                                                                                                                                                                                                                                                                                                                                                 | C21H20O6        | 368.38   | Curcumin             |
| Selleck | Chemicals | S1672 | <chem>c1(C2(CC)C(=O)NC(=O)CC2)ccc(N)cc1</chem>                                                                                                                                                                                                                                                                                                                                                                             | C13H16N2O2      | 232.278  | Aminoglutethimide    |
| Selleck | Chemicals | S1881 | <chem>c1(CCC)cc(C(=S)N)ccn1</chem>                                                                                                                                                                                                                                                                                                                                                                                         | C9H12N2S        | 180.27   | Protonamide          |
| Selleck | Chemicals | S1691 | <chem>c1cc2c(CCN3C2CN(C(=O)C4CCCC4)CC3=O)cc1</chem><br><chem>[C@H]1(CC(=O)N)[C@]2([H])N=C(C(C)=C(N=C3C=C(C(N=C4C(C)=C([N-</chem><br><chem>]C@@]25C)[C@@H](CCC(=O)N)[C@]5(C)CC(=O)N)[C@@H](CCC(=O)</chem><br><chem>N)[C@@]4(CC(=O)N)C)[C@@H](CCC(=O)N)C3(C)C[C@]1(C)CCC(=O)N</chem><br><chem>C[C@H](C)OP(=O)([O-</chem><br><chem>]O)[C@@H]q[C@H](CO)O[C@H](n7c8c(cc(C)c(C)c8)nc7)[C@@H]6O.[Co</chem><br><chem>+2]C#N</chem> | C19H24N2O2      | 312.406  | Praziquantel         |
| Selleck | Chemicals | S1902 | <chem>c1cc2c(CC[C@]3([H])[C@@]2([H])CC[C@@]4(C)[C@@]3([H])CC[C@H]4</chem><br><chem>O)cc1O</chem>                                                                                                                                                                                                                                                                                                                           | C63H88CoN14O14P | 1355.365 | Vitamin B12          |
| Selleck | Chemicals | S1709 | <chem>c1cc2c(CC[C@]3([H])[C@@]2([H])CC[C@@]4(C)[C@@]3([H])CC[C@H]4</chem><br><chem>O)cc1O</chem>                                                                                                                                                                                                                                                                                                                           | C18H24O2        | 272.382  | Estradiol            |
| Selleck | Chemicals | S1915 | <chem>c1cc(S(=O)(=O)Nc2ncc(C)c2)ccc1N</chem>                                                                                                                                                                                                                                                                                                                                                                               | C10H11N3O3S     | 253.278  | Sulfamethoxazole     |
| Selleck | Chemicals | S1949 | <chem>c1cc2c(C(=O)C=C(C)C2=O)cc1</chem><br><chem>[C@]1([H])([C@H](O)C)[C@@]2([H])N(C(C(=O)OCO(C(=O)C(C)(C)C)=C(</chem><br><chem>SC3CN(C4=NCCS4)C3)[C@H]2C)C1=O</chem>                                                                                                                                                                                                                                                      | C11H8O2         | 172.18   | Menadione            |
| Selleck | Chemicals | S2159 | <chem>[C@]1([H])([C@H](O)C)[C@@]2([H])N(C(C(=O)OCO(C(=O)C(C)(C)C)=C(</chem><br><chem>SC3CN(C4=NCCS4)C3)[C@H]2C)C1=O</chem>                                                                                                                                                                                                                                                                                                 | C22H31N3O6S2    | 497.628  | Tebipenem Pivoxil    |
| Selleck | Chemicals | S1971 | <chem>c1cc(C(NCCO[N+])(=O)[O-])=O)cncc1</chem><br><chem>c1c(Cl)c(C(=O)NCC(=O)N)[C@@H](CC(C)C)B2O C(=O)CC(C(C)=O)(C(O</chem><br><chem>)=O)O2)cc(Cl)c1</chem>                                                                                                                                                                                                                                                                | C8H9N3O4        | 211.175  | Nicorandil           |
| Selleck | Chemicals | S2181 | <chem>c1cc([C@H](NC(=O)C2CCC(F)(F)CC2)CCN(C3CC4)C4CC(n5c(C(C)C)nn</chem><br><chem>c5C)C3)ccc1</chem>                                                                                                                                                                                                                                                                                                                       | C20H23BCl2N2O9  | 517.122  | MLN9708              |
| Selleck | Chemicals | S2003 | <chem>c1cc([C@H](NC(=O)C2CCC(F)(F)CC2)CCN(C3CC4)C4CC(n5c(C(C)C)nn</chem><br><chem>c5C)C3)ccc1</chem>                                                                                                                                                                                                                                                                                                                       | C29H41F2N5O     | 513.666  | Maraviroc            |
| Selleck | Chemicals | S2198 | <chem>c1cc2n(c(c3cc(OC(F)(F)F)ccc3)cn2)nc1NCC4CCN(C)CC4</chem>                                                                                                                                                                                                                                                                                                                                                             | C20H22F3N5O     | 405.417  | SGI-1776 free base   |
| Selleck | Chemicals | S2024 | <chem>c1(scc2)c2C(=C3CCN(C)CC3)c4c(cccc4)CC1=O.C(=O)(O)C=CC(=O)O</chem>                                                                                                                                                                                                                                                                                                                                                    | C23H23NO5S      | 425.497  | Ketotifen Fumarate   |
| Selleck | Chemicals | S2216 | <chem>c1cc(C=Cc2nc(CO c3ccc(CCCn4ccnn4)cc3)co2)ccc1C(F)(F)F</chem>                                                                                                                                                                                                                                                                                                                                                         | C25H23F3N4O2    | 468.471  | Mubritinib (TAK 165) |
| Selleck | Chemicals | S2036 | <chem>C(=O)(O)C[C@H](N)C(=O)N[C@@H](Cc1ccccc1)C(=O)OC</chem>                                                                                                                                                                                                                                                                                                                                                               | C14H18N2O5      | 294.303  | Aspartame            |
| Selleck | Chemicals | S2227 | <chem>n1c(N)c2c(n(CCC3=Nc4c(c(C)ccc4)C(=O)N3c5ccccc5C)nc2c6cccc(O)c6)nc1</chem>                                                                                                                                                                                                                                                                                                                                            | C28H23N7O2      | 489.528  | PIK-294              |

|           |       |                                                                                                                                                                                                                                              |                 |         |                           |  |
|-----------|-------|----------------------------------------------------------------------------------------------------------------------------------------------------------------------------------------------------------------------------------------------|-----------------|---------|---------------------------|--|
| Selleck   |       |                                                                                                                                                                                                                                              |                 |         |                           |  |
| Chemicals | S2053 | <chem>C1(=O)N=C(N)C=CN1[C@H]2[C@@H](O)[C@H](O)[C@@H](CO)O2</chem>                                                                                                                                                                            | C9H13N3O5       | 243.217 | Cytidine                  |  |
| Selleck   |       |                                                                                                                                                                                                                                              |                 |         |                           |  |
| Chemicals | S2243 | <chem>c1(Br)nc(C=C(C#N)C=O)N[C@@H](CCC)c2ccccc2ccc1</chem>                                                                                                                                                                                   | C19H18BrN3O     | 384.27  | Degrasyn (WP1130)         |  |
| Selleck   |       |                                                                                                                                                                                                                                              |                 |         |                           |  |
| Chemicals | S2065 | <chem>c1c(CN2CCCC2)ccnc1OCC=CCNC(=O)CS(Cc3occcc3)=O</chem>                                                                                                                                                                                   | C22H29N3O4S     | 431.548 | Lafutidine                |  |
| Selleck   |       |                                                                                                                                                                                                                                              |                 |         |                           |  |
| Chemicals | S2260 | <chem>[C@H]1(O)[C@@H](O)[C@@H](CO)O[C@@H](OC[C@H]2O[C@@H](O)[C@@H](C#N)c3ccccc3)[C@H](O)[C@@H](O)[C@@H]2O)[C@@H]1O</chem>                                                                                                                    | C20H27NO11      | 457.428 | Laetrile                  |  |
| Selleck   |       |                                                                                                                                                                                                                                              |                 |         |                           |  |
| Chemicals | S2091 | <chem>c1c(CCOCC2CC2)ccc(OC(C)CNC(C)C)c1</chem>                                                                                                                                                                                               | C18H29NO3       | 307.428 | Betaxolol                 |  |
| Selleck   |       |                                                                                                                                                                                                                                              |                 |         |                           |  |
| Chemicals | S2268 | <chem>c1(O)cc2c(C(=O)C=C(c3ccccc3)O2)c(O)c1O</chem>                                                                                                                                                                                          | C15H10O5        | 270.237 | Baicalein                 |  |
| Selleck   |       |                                                                                                                                                                                                                                              |                 |         |                           |  |
| Chemicals | S2119 | <chem>c1(C(C)(C)C)cc(SC(C)(C)Sc2cc(C(C)(C)C)c(O)c(C(C)(C)C)c2)cc(C(C)(C)C)c1O</chem>                                                                                                                                                         | C31H48O2S2      | 516.842 | Probucol                  |  |
| Selleck   |       |                                                                                                                                                                                                                                              |                 |         |                           |  |
| Chemicals | S2285 | <chem>C1Cc2c(ccc3c2C(=O)C(=O)C4=C3OC[C@H]4C(C)(C)C1</chem>                                                                                                                                                                                   | C19H20O3        | 296.36  | Cryptotanshinone          |  |
| Selleck   |       |                                                                                                                                                                                                                                              |                 |         |                           |  |
| Chemicals | S2131 | <chem>n1cc(Cl)c(NC(=O)c2cc(OC(C)CC3CC3)c(OC(F)F)cc2)c(Cl)c1</chem>                                                                                                                                                                           | C17H14Cl2F2N2O3 | 403.207 | Roflumilast               |  |
| Selleck   |       |                                                                                                                                                                                                                                              |                 |         |                           |  |
| Chemicals | S2300 | <chem>c1cc(C=C(C=O)O)cc(OC)c1O</chem>                                                                                                                                                                                                        | C10H10O4        | 194.184 | Ferulic Acid              |  |
| Selleck   |       |                                                                                                                                                                                                                                              |                 |         |                           |  |
| Chemicals | S2302 | <chem>C1[C@@H]2(C)[C@@H]([H])(CC[C@@H]3(C)[C@@H]2([H])C(=O)C=C4[C@@H]3(C)CC[C@@H]5(C)[C@@H]4([H])C[C@@H](C)(C(=O)O)CC5(C)(C)[C@H]1O[C@@H]6[C@@H](O)[C@H]7[C@@H](O)[C@@H](O)[C@H](O)[C@@H](C(=O)O)O7)[C@@H](O)[C@H](O)[C@@H](C(=O)O)O6</chem> | C42H62O16       | 822.932 | Glycyrrhizic Acid         |  |
| Selleck   |       |                                                                                                                                                                                                                                              |                 |         |                           |  |
| Chemicals | S2467 | <chem>n1cc2c(n(CCC(COC(=O)C)COC(C)=O)cn2)nc1N</chem>                                                                                                                                                                                         | C14H19N5O4      | 321.332 | Famciclovir               |  |
| Selleck   |       |                                                                                                                                                                                                                                              |                 |         |                           |  |
| Chemicals | S2320 | <chem>c1(O)cc2c(C(=O)C=C(c3cc(O)c(O)cc3)O2)c(O)c1</chem>                                                                                                                                                                                     | C15H10O6        | 286.236 | Luteolin                  |  |
| Selleck   |       |                                                                                                                                                                                                                                              |                 |         |                           |  |
| Chemicals | S2480 | <chem>c1cc(C2(O)CCN(CCC(c3ccccc3)(c4ccccc4)N(C)C)=O)CC2)ccc1Cl.Cl</chem>                                                                                                                                                                     | C29H34Cl2N2O2   | 513.498 | Loperamide HCl            |  |
| Selleck   |       |                                                                                                                                                                                                                                              |                 |         |                           |  |
| Chemicals | S2337 | <chem>c1(OC)c(CC=C(C)C)c2c(C=CC(=O)O2)cc1</chem>                                                                                                                                                                                             | C15H16O3        | 244.286 | Osthole                   |  |
| Selleck   |       |                                                                                                                                                                                                                                              |                 |         |                           |  |
| Chemicals | S2492 | <chem>[C@H]1(O)C(C)(C)O[C@@H](Oc2c(C)c3c(C(O)=C(NC(c4cc(CC=C(C)C)c([O-])cc4)=O)C(=O)O3)cc2)[C@H](O)[C@@H]1OC(=O)N.[Na+]</chem>                                                                                                               | C31H35N2NaO11   | 634.606 | Novobiocin Sodium         |  |
| Selleck   |       |                                                                                                                                                                                                                                              |                 |         |                           |  |
| Chemicals | S2347 | <chem>c1(O)cc2c(C(=O)C(O)=C(c3cc(O)c(O)cc3)O2)c(O)c1.O.O</chem>                                                                                                                                                                              | C15H14O9        | 338.266 | Quercetin Dihydrate       |  |
| Selleck   |       |                                                                                                                                                                                                                                              |                 |         |                           |  |
| Chemicals | S2502 | <chem>c1c(OC)cc2c(nc2c2[C@H](O)[C@H]3([H])C[C@@H]([H])([C@H](C=C)CN34)CC4)c1.Cl.O.O</chem>                                                                                                                                                   | C20H29ClN2O4    | 396.908 | Quinine HCl Dihydrate     |  |
| Selleck   |       |                                                                                                                                                                                                                                              |                 |         |                           |  |
| Chemicals | S2364 | <chem>c1(C)c2c(c3c(c4c(c(C)co4)C(=O)C3=O)cc2)cc1</chem>                                                                                                                                                                                      | C18H12O3        | 276.286 | Tanshinone I              |  |
| Selleck   |       |                                                                                                                                                                                                                                              |                 |         |                           |  |
| Chemicals | S2515 | <chem>C1CN(S(=O)(=O)c2cc(C(NC(=O)c3n4c(CCC)nc3=N4)c(OCC)cc2)CCN1C.C.Cl.O.O.O</chem>                                                                                                                                                          | C23H39ClN6O7S   | 579.11  | Vardenafil HCl Trihydrate |  |
| Selleck   |       |                                                                                                                                                                                                                                              |                 |         |                           |  |
| Chemicals | S2377 | <chem>c1(O)cc2c(C(=O)C)c3ccc(OC)cc3=CO2)c(O)c1</chem>                                                                                                                                                                                        | C16H12O5        | 284.263 | Biochanin A               |  |
| Selleck   |       |                                                                                                                                                                                                                                              |                 |         |                           |  |
| Chemicals | S2534 | <chem>c1cc(C(Cn2cnc2)OCc3c(Cl)cccc3Cl)c(Cl)c1Cl.[N+](O)(=O)[O-]</chem>                                                                                                                                                                       | C18H15Cl4N3O4   | 479.141 | Isoconazole nitrate       |  |
| Selleck   |       |                                                                                                                                                                                                                                              |                 |         |                           |  |
| Chemicals | S2390 | <chem>[C@@H]1(O)[C@H](O)[C@H](Oc2cc(C=Cc3ccc(O)cc3)cc(O)c2)O[C@H](CO)[C@H]1O</chem>                                                                                                                                                          | C20H22O8        | 390.384 | Polydatin                 |  |
| Selleck   |       |                                                                                                                                                                                                                                              |                 |         |                           |  |
| Chemicals | S2548 | <chem>Cl.[C@@H]1([H])(C[C@@H](O)C2N(C)[C@H]2([H])[C@@H]3([H])[C@H]1([H])O3</chem>                                                                                                                                                            | C8H14ClNO2      | 191.655 | Scopine HCl               |  |
| Selleck   |       |                                                                                                                                                                                                                                              |                 |         |                           |  |
| Chemicals | S2403 | <chem>c1c(OC)c(OC)c2c([C@H]3Cc(cc4Oc5ccc(cc5)[C@H]6c(cc7O2)c(CCN6C)cc7OC)ccc4OC)c1CCN3C</chem>                                                                                                                                               | C38H42N2O6      | 622.75  | Tetrandrine               |  |
| Selleck   |       |                                                                                                                                                                                                                                              |                 |         |                           |  |
| Chemicals | S2561 | <chem>c1cc(C(Cl)=C(c2ccc(OCN(C)CC)cc2)c3ccccc3)ccc1.O.C(=O)CC(O)(C(O)=O)CC(=O)O</chem>                                                                                                                                                       | C32H36ClNO8     | 598.083 | Clomifene citrate         |  |
| Selleck   |       |                                                                                                                                                                                                                                              |                 |         |                           |  |
| Chemicals | S2412 | <chem>O1[C@H](O)[C@@H]2([H])[C@H]([H])(CC=C2CO)C(C(OC)=O)=C1</chem>                                                                                                                                                                          | C11H14O5        | 226.226 | Genipin                   |  |
| Selleck   |       |                                                                                                                                                                                                                                              |                 |         |                           |  |
| Chemicals | S2579 | <chem>N1C(=O)C(C)=CN([C@H]2[C@H](N=[N+]=[N-])[C@@H](CO)O2)C1=O</chem>                                                                                                                                                                        | C10H13N5O4      | 267.241 | Zidovudine                |  |
| Selleck   |       |                                                                                                                                                                                                                                              |                 |         |                           |  |
| Chemicals | S2446 | <chem>C(#N)C=NNc1ccc(C2=NNC(=O)C[C@H]2C)cc1)C#N</chem>                                                                                                                                                                                       | C14H12N6O       | 280.285 | Levosimendan              |  |
| Selleck   |       |                                                                                                                                                                                                                                              |                 |         |                           |  |
| Chemicals | S2599 | <chem>c1(O)c(l)cc(OCc2c(l)cc(C[C@H](N)C(=O)O)cc2)cc1l</chem>                                                                                                                                                                                 | C15H11I4NO4     | 776.87  | L-Thyroxine               |  |
| Selleck   |       |                                                                                                                                                                                                                                              |                 |         |                           |  |
| Chemicals | S2608 | <chem>C1=C[C@@H]2(C)C([C@@H](F)C[C@H]3([H])[C@@H]2(F)[C@H](O)C[C@@H]4(C)[C@@H]3([H])C[C@@H]5(C)[C@H]4(C(=O)CO)C(C)O5)=CC1=O</chem>                                                                                                           | C26H32F2O7      | 494.525 | Fluocinonide              |  |
| Selleck   |       |                                                                                                                                                                                                                                              |                 |         |                           |  |
| Chemicals | S2752 | <chem>n1c(c2c(Nc3ccc(OCc4ccn5c(ncn5)c4)c(C)c3)nc1)ccc(c6ccc(CNCCS(C)(=O)=O)o6)c2</chem>                                                                                                                                                      | C29H27N7O4S     | 569.634 | HER2-Inhibitor-1          |  |

|           |       |                                                                                                                      |               |         |                                                |  |  |
|-----------|-------|----------------------------------------------------------------------------------------------------------------------|---------------|---------|------------------------------------------------|--|--|
| Selleck   |       |                                                                                                                      |               |         |                                                |  |  |
| Chemicals | S2621 | <chem>c1cc(Nc2nc(c3n(C(C)C)c(C)nc3)ccn2)ccc1S(=O)(C)=O</chem>                                                        | C18H21N5O2S   | 371.457 | AZD5438                                        |  |  |
| Selleck   |       |                                                                                                                      |               |         |                                                |  |  |
| Chemicals | S2768 | <chem>C1CCN(c2nc3n(nc3CC)c(NC4c[n+](O-))ccc4c2)[C@H](CCO)C1</chem>                                                   | C21H28N6O2    | 396.486 | Dinaciclib (SCH727965)                         |  |  |
| Selleck   |       |                                                                                                                      |               |         |                                                |  |  |
| Chemicals | S2631 | <chem>c1ccc(OC(=O)NC2CCCCC2)cc1c3cc(C(=O)N)ccc3</chem>                                                               | C20H22N2O3    | 338.4   | URB597                                         |  |  |
| Selleck   |       |                                                                                                                      |               |         |                                                |  |  |
| Chemicals | S2779 | <chem>c1(N(C)C)ccc(C(=O)NCCCCC(C=O)NO)cc1</chem>                                                                     | C16H25N3O3    | 307.388 | M344                                           |  |  |
| Selleck   |       |                                                                                                                      |               |         |                                                |  |  |
| Chemicals | S2656 | <chem>n1(c2cc(N[C@H]3CC[C@H](OC(=O)CN)CC3)c(C(N)=O)cc2)nc(C(F)(F)F)c4c1CC(C)(C)CC4=O</chem>                          | C25H30F3N5O4  | 521.532 | PF-04929113 (SNX-5422)                         |  |  |
| Selleck   |       |                                                                                                                      |               |         |                                                |  |  |
| Chemicals | S2790 | <chem>n1(C)c(c2nc1C=Cc3ccc(OC)c(OC)c3)C(=O)N(CC)C(=O)N2CC</chem>                                                     | C20H24N4O4    | 384.429 | Istradefylline                                 |  |  |
| Selleck   |       |                                                                                                                      |               |         |                                                |  |  |
| Chemicals | S2666 | <chem>c1(C(F)(F)F)ccc(OC2cccc(C3CCN(C(=O)Nc4ccnc4)CC3)c2)nc1</chem>                                                  | C24H23F3N4O2  | 456.46  | PF-3845                                        |  |  |
| Selleck   |       |                                                                                                                      |               |         |                                                |  |  |
| Chemicals | S2803 | <chem>[C@](C)(C(n1nc2c1cccc2)=CC3)(CCC4C5CC=C6[C@]4(C)C[C@H](O)C6)C35</chem>                                         | C26H32N2O     | 388.545 | Galeterone                                     |  |  |
| Selleck   |       |                                                                                                                      |               |         |                                                |  |  |
| Chemicals | S2681 | <chem>c(OC(F)(F)O1)(cc(C=C2C(=O)NC(=O)S2)cc3)c13</chem>                                                              | C11H5F2NO4S   | 285.224 | AS-604850<br>CHIR-99021 (CT99021)              |  |  |
| Selleck   |       |                                                                                                                      |               |         |                                                |  |  |
| Chemicals | S2924 | <chem>c1(NCCNc2ccc(C#N)cn2)nc(c3c(Cl)cc(Cl)cc3)c(c4nc(C)c[nH]4)cn1.Cl</chem>                                         | C22H19Cl3N8   | 501.799 | HCl                                            |  |  |
| Selleck   |       |                                                                                                                      |               |         |                                                |  |  |
| Chemicals | S2692 | <chem>c1ccc(Nc2c(C)cn(CNc3ccc(N4CCN(C)CC4)cc3)n2)cc1S(=O)(=O)NC(C)(C)C</chem>                                        | C26H35N7O2S   | 509.667 | TG101209                                       |  |  |
| Selleck   |       |                                                                                                                      |               |         |                                                |  |  |
| Chemicals | S3019 | <chem>C(C(=O)N(O)C(C1CCCC1)=C2)=C2C.NCCO</chem>                                                                      | C14H24N2O3    | 268.352 | Ciclopirox ethanolamine                        |  |  |
| Selleck   |       |                                                                                                                      |               |         |                                                |  |  |
| Chemicals | S2714 | <chem>c1(F)cc([C@H](O)C(=O)N[C@@H](C)C(=O)N[C@@H]2C(=O)N(C)c3c(ccc3)c4c2cccc4)cc(F)c1</chem>                         | C26H23F2N3O4  | 479.475 | LY411575                                       |  |  |
| Selleck   |       |                                                                                                                      |               |         |                                                |  |  |
| Chemicals | S3061 | <chem>c1(O)ccc([C@@H](O)CNC)cc1O.Cl</chem>                                                                           | C9H14ClNO3    | 219.665 | Epinephrine HCl<br>AG-1478 (Typhostin AG-1478) |  |  |
| Selleck   |       |                                                                                                                      |               |         |                                                |  |  |
| Chemicals | S2728 | <chem>c1c(OC)c(OC)cc2c1ncnc2Nc3cccc(Cl)c3</chem>                                                                     | C16H14ClN3O2  | 315.754 |                                                |  |  |
| Selleck   |       |                                                                                                                      |               |         |                                                |  |  |
| Chemicals | S5002 | <chem>c1(CCC(CO)(N)CO)ccc(CCCCCC)cc1.Cl</chem>                                                                       | C19H34ClNO2   | 343.932 | Fingolimod (FTY720) HCl                        |  |  |
| Selleck   |       |                                                                                                                      |               |         |                                                |  |  |
| Chemicals | S2743 | <chem>n1c(C)c2c(N([C@@H]3CC[C@@H](OCCO)CC3)C(=O)C(c4nc(OC)cc4)=C2)nc1N</chem>                                        | C22H27N5O4    | 425.481 | PF-04691502                                    |  |  |
| Selleck   |       |                                                                                                                      |               |         |                                                |  |  |
| Chemicals | S2308 | <chem>c1(O)cc2c(C(=O)C[C@@H](c3cc(O)c(OC)cc3)O2)c(O)c1</chem>                                                        | C16H14O6      | 302.279 | Hesperetin                                     |  |  |
| Selleck   |       |                                                                                                                      |               |         |                                                |  |  |
| Chemicals | S2468 | <chem>c1ccc(Sc2ccc3c([nH]c(NC(=O)OC)n3)c2)cc1</chem>                                                                 | C15H13N3O2S   | 299.348 | Fenbendazole                                   |  |  |
| Selleck   |       |                                                                                                                      |               |         |                                                |  |  |
| Chemicals | S2322 | <chem>C1[C@@]2([H])[C@@]([H])([C@]3([H])[C@]4([H])N(C(=O)CCC4)C2)N(CC3)CC1</chem>                                    | C15H24N2O     | 248.364 | (+)-Matrine                                    |  |  |
| Selleck   |       |                                                                                                                      |               |         |                                                |  |  |
| Chemicals | S2481 | <chem>c1([N+])=(O)O-<br/>]cccc(C2C(C(=O)OCCN3CCN(C(c4ccccc4)c5ccccc5)CC3)=C(C)NC(C)=C2C(OC)=O)c1</chem>              | C35H38N4O6    | 610.699 | Manidipine                                     |  |  |
| Selleck   |       |                                                                                                                      |               |         |                                                |  |  |
| Chemicals | S2338 | <chem>C1[C@@]2([H])[C@@]([H])([C@]3([H])[C@]4([H])N(C(=O)CCC4)C2)[N+](O-)](CCC3)CC1</chem>                           | C15H24N2O2    | 264.363 | Oxymatrine                                     |  |  |
| Selleck   |       |                                                                                                                      |               |         |                                                |  |  |
| Chemicals | S2494 | <chem>C1(c2c(cccc2)COc3c1cc(C(C(=O)O)cc3)=CCN(C)C.Cl</chem>                                                          | C21H24ClNO3   | 373.873 | Olopatadine HCl                                |  |  |
| Selleck   |       |                                                                                                                      |               |         |                                                |  |  |
| Chemicals | S2349 | <chem>N(CCc1c2[nH]c3c1cccc3)(C(=O)c4c5cccc4)C2=N5</chem>                                                             | C18H13N3O     | 287.315 | Rutaecarpine                                   |  |  |
| Selleck   |       |                                                                                                                      |               |         |                                                |  |  |
| Chemicals | S2503 | <chem>c1ccc(COC(=O)CNC(=O)C(Cc2ccccc2)CSC(C)=O)cc1</chem>                                                            | C21H23NO4S    | 385.477 | Racecadotril                                   |  |  |
| Selleck   |       |                                                                                                                      |               |         |                                                |  |  |
| Chemicals | S2365 | <chem>C1Cc2c(ccc3c2C(=O)C(=O)c4c3ccc4C)C(C)(C)C1</chem>                                                              | C19H18O3      | 294.344 | Tanshinone IIA                                 |  |  |
| Selleck   |       |                                                                                                                      |               |         |                                                |  |  |
| Chemicals | S2517 | <chem>c1cc2c(C3c4c(cccc4)C2(CCCNC)CC3)cc1.Cl</chem>                                                                  | C20H24ClN     | 313.864 | Maprotiline HCl                                |  |  |
| Selleck   |       |                                                                                                                      |               |         |                                                |  |  |
| Chemicals | S2378 | <chem>[Br-]<br/>].c1ccccc1[C@H](CO)C(=O)O[C@@H]2[C@@]([H])([N+](C)(CCCC)[C@@]3([H])C2)[C@]4([H])[C@@]3([H])O4</chem> | C21H30BrNO4   | 440.371 | Butylscopolamine Bromide                       |  |  |
| Selleck   |       |                                                                                                                      |               |         |                                                |  |  |
| Chemicals | S2535 | <chem>c1cc(C(OCc2ccc(Cl)cc2)Cn3cncc3)c(Cl)cc1Cl.[N+](O)(=O)[O-]</chem>                                               | C18H16Cl3N3O4 | 444.696 | Econazole nitrate                              |  |  |
| Selleck   |       |                                                                                                                      |               |         |                                                |  |  |
| Chemicals | S2391 | <chem>c1(O)cc2c(C(=O)C(O)=C(c3cc(O)c(O)cc3)O2)c(O)c1</chem>                                                          | C15H10O7      | 302.236 | Quercetin                                      |  |  |
| Selleck   |       |                                                                                                                      |               |         |                                                |  |  |
| Chemicals | S2549 | <chem>[Cl-].[C@@]1([H])(Cl)C[C@@H](OC(=O)C(O)(c2ccccc2)c3ccccc3)C4)[N+](CC5)[C@]4([H])CC1</chem>                     | C25H30ClNO3   | 427.964 | Trospium chloride                              |  |  |
| Selleck   |       |                                                                                                                      |               |         |                                                |  |  |
| Chemicals | S2404 | <chem>c1cc(C=C(C(=O)c2ccc(O)cc2O)ccc1O</chem>                                                                        | C15H12O4      | 256.253 | Isoliquiritigenin                              |  |  |



|           |       |                                                                                                                                                                              |                 |         |                                           |
|-----------|-------|------------------------------------------------------------------------------------------------------------------------------------------------------------------------------|-----------------|---------|-------------------------------------------|
| Selleck   |       | [C@H]1(NC(c2c(c3c(Cl)cccc3)noc2C)=O)[C@@]4([H])N([C@@H](C([O-])=O)C(C)(C)S4)C1=O.[Na+].O                                                                                     | C19H19ClN3NaO6S | 475.878 | Cloxacillin Sodium                        |
| Chemicals | S2564 |                                                                                                                                                                              |                 |         |                                           |
| Selleck   |       | C1=C(C(O)=O)[C@]2([H])[C@@]([H])(C(CO)=CC2)[C@H](O)[C@H]3[C@@H](O)[C@@H](O)[C@H](O)[C@@H](CO)O3)O1                                                                           | C16H22O10       | 374.34  | Geniposidic acid                          |
| Chemicals | S2413 |                                                                                                                                                                              |                 |         |                                           |
| Selleck   |       | c1cc([C@H](O)[C@@H](CO)NC(=O)C(Cl)Cl)ccc1S(=O)(=O)C                                                                                                                          | C12H15Cl2NO5S   | 356.222 | Thiamphenicol                             |
| Chemicals | S2583 |                                                                                                                                                                              |                 |         |                                           |
| Selleck   |       | C1(CC(N)(CC2C1)CC3C2)C3.Cl                                                                                                                                                   | C10H18ClN       | 187.71  | Amantadine HCl                            |
| Chemicals | S2451 |                                                                                                                                                                              |                 |         |                                           |
| Selleck   |       | c1cc(S(=O)(=O)NC(=O)NN2CC3C(CCC3)C2)ccc1C                                                                                                                                    | C15H21N3O3S     | 323.411 | Gliclazide                                |
| Chemicals | S2601 |                                                                                                                                                                              |                 |         |                                           |
| Selleck   |       | OC[C@@H](O)[C@@H](O)[C@@H](O)CO                                                                                                                                              | C5H12O5         | 152.146 | Ribitol                                   |
| Chemicals | S2612 |                                                                                                                                                                              |                 |         |                                           |
| Selleck   |       | c(ccc(NC1=N[C@H](C)CO1)c2)(ncnc3Nc4ccc(OCc5nccs5)c(Cl)c4)c23                                                                                                                 | C22H19ClN6O2S   | 466.943 | Varlitinib                                |
| Chemicals | S2755 |                                                                                                                                                                              |                 |         |                                           |
| Selleck   |       | c1(c2c3c(ncnc3N)n(C4CCCC4)n2)cc5c([nH]cc5)nc1                                                                                                                                | C17H17N7        | 319.364 | PP121                                     |
| Chemicals | S2622 |                                                                                                                                                                              |                 |         |                                           |
| Selleck   |       | n1c(C[C@]2(C(O)=O)CC[C@H](O)c3cccc(Cl)c3F)CC2)cccc1Nc4nccs4                                                                                                                  | C22H21ClFN3O3S  | 461.937 | MK-5108 (VX-689)                          |
| Chemicals | S2770 |                                                                                                                                                                              |                 |         |                                           |
| Selleck   |       | c1c(OC)c2c(ncc2C(=O)C(=O)N3CCN(C(c4cccc4)=O)C[C@H]3C)[nH]c1                                                                                                                  | C22H22N4O4      | 406.434 | BMS-378806                                |
| Chemicals | S2632 |                                                                                                                                                                              |                 |         |                                           |
| Selleck   |       | c1(OC)cc2c(ncc3c2N([C@@H](c4ncccc4)C)(=O)N3)cc1c5c(C)noc5C                                                                                                                   | C23H21N5O3      | 415.445 | I-BET151<br>(GSK1210151A)                 |
| Chemicals | S2780 |                                                                                                                                                                              |                 |         |                                           |
| Selleck   |       | c1(S(Nc2cc(c3ccc(c4c3)cccc4c5ccnnc5)cn2O2C)(=O)=O)ccc(F)cc1F                                                                                                                 | C25H17F2N5O3S   | 505.496 | GSK2126458 (GSK458)                       |
| Chemicals | S2658 |                                                                                                                                                                              |                 |         |                                           |
| Selleck   |       | N1C(=O)C(c2c(c3nc(N4CCN(C)CC4)n2)cccc3)=C(c5c(c6[nH]c5)cccc6)C1=O                                                                                                            | C25H22N6O2      | 438.481 | Sotrastaurin                              |
| Chemicals | S2791 |                                                                                                                                                                              |                 |         |                                           |
| Selleck   |       | c1(F)ccc(CNC(=O)C(C(=O)C(O)=C2N3C[C@@]4([H])N([C@@H](C)CCO4)C2=O)=C3)c(F)c1                                                                                                  | C20H19F2N3O5    | 419.379 | Dolutegravir<br>(GSK1349572)              |
| Chemicals | S2667 |                                                                                                                                                                              |                 |         |                                           |
| Selleck   |       | c1(S(Nc2cccc(c3c(c4ccnc(N)n4)sc(C(C)(C)C)n3)c2F)(=O)=O)c(F)cccc1F                                                                                                            | C23H20F3N5O2S2  | 519.562 | Dabrafenib<br>(GSK2118436)                |
| Chemicals | S2807 |                                                                                                                                                                              |                 |         |                                           |
| Selleck   |       | c1(F)ccc(c2ccc(C=C3SC(=O)NC3=O)o2)cc1                                                                                                                                        | C14H8FNO3S      | 289.282 | CAY10505                                  |
| Chemicals | S2682 |                                                                                                                                                                              |                 |         |                                           |
| Selleck   |       | N1(C)C(C(C=C2)CC1S([O-])(=O)=O)=CC(=O)C2=NNC(N)=O.[Na+]                                                                                                                      | C10H11N4NaO5S   | 322.273 | Carbazochrome sodium<br>sulfonate (AC-17) |
| Chemicals | S3000 |                                                                                                                                                                              |                 |         |                                           |
| Selleck   |       | c1(c2nc3c(sc(CN4CCN(C(=O)[C@H](C)O)CC4)c3C)c(N5CCOCC5)n2)cn(C(N)nc1                                                                                                          | C23H30N8O3S     | 498.601 | GDC-0980 (RG7422)                         |
| Chemicals | S2696 |                                                                                                                                                                              |                 |         |                                           |
| Selleck   |       | S1CCC=C[C@@H]2CC(=O)N[C@@H](C(C)C)C(=O)N[C@@H](C(=O)NC(=CC)C(=O)N[C@@H](C(C)C)C(=O)O2)CS1                                                                                    | C24H36N4O6S2    | 540.696 | Romidepsin (FK228,<br>Depsipeptide)       |
| Chemicals | S3020 |                                                                                                                                                                              |                 |         |                                           |
| Selleck   |       | c1(Cl)cc2c([nH]c(C(=O)N[C@@H](Cc3ccccc3)[C@@H](O)C(N(C)C)=O)c2)cc1                                                                                                           | C21H22ClN3O3    | 399.871 | CP-91149                                  |
| Chemicals | S2717 |                                                                                                                                                                              |                 |         |                                           |
| Selleck   |       | c1cc(Cc([O-])(=O)c(Nc2c(Cl)cccc2Cl)cc1.[K+]                                                                                                                                  | C14H10Cl2KNO2   | 334.239 | Diclofenac Potassium                      |
| Chemicals | S3062 |                                                                                                                                                                              |                 |         |                                           |
| Selleck   |       | C1(=O)NC(=O)C(Nc2ccc(O)c(Cl)c2)=C1c3ccccc3[N+]([O-])=O                                                                                                                       | C16H10ClN3O5    | 359.721 | SB415286                                  |
| Chemicals | S2729 |                                                                                                                                                                              |                 |         |                                           |
| Selleck   |       | [C@H]1(O)C[C@@H](O)CC[C@@H](C=C(C)[C@H]2OC(=O)[C@@]3([H])N(CCCC3)C(=O)C(=O)[C@](O)(O)[C@H]4[C@@H](OC)C[C@@H](C)CC(C)=C[C@@H](CC=C)C(=O)C[C@H](O)[C@H]2C)[C@H](C)C[C@@H]4O)C1 | C44H69NO12      | 804.018 | Tacrolimus (FK506)                        |
| Chemicals | S5003 |                                                                                                                                                                              |                 |         |                                           |
| Selleck   |       | c1(Br)c(N2CCN(Cc3noc(C)c3)CC2)c4c([nH]c(c5ccc(N6CCN(C)CC6)cc5)n4)nc1                                                                                                         | C26H31BrN8O     | 551.481 | CCT137690                                 |
| Chemicals | S2744 |                                                                                                                                                                              |                 |         |                                           |
| Selleck   |       | [C@H]1(CO[C@@H]2O[C@@H](C)[C@H](O)[C@H](O)[C@H]2O)O[C@@H](Oc3cc4c(C(=O)C[C@@H](c5cc(O)c(OC)cc5)O4)c(O)c3)[C@H](O)[C@@H](O)[C@@H]1O                                           | C28H34O15       | 610.561 | Hesperidin                                |
| Chemicals | S2309 |                                                                                                                                                                              |                 |         |                                           |
| Selleck   |       | C1=C[C@@]2(C)C([C@](F)([H])C[C@]3([H])[C@@]2(F)[C@H](O)C[C@@]4(C)[C@@]3([H])C[C@]5([H])[C@@]4(C(=O)CO)OC(C)(CO)5)=CC1=O                                                      | C24H30F2O6      | 452.488 | Fluocinolone Acetonide                    |
| Chemicals | S2470 |                                                                                                                                                                              |                 |         |                                           |
| Selleck   |       | [C@H]1(O)[C@@H](C)O[C@@H](O[C[C@H]2O[C@@H](Oc3cc4c(C(=O)C[C@@H](c5ccc(O)c(OC)cc5)O4)c(O)c3)[C@H](O)[C@H](O)[C@@H]2O)[C@H](O)[C@@H]1O.CO                                      | C29H38O16       | 642.602 | Methyl-Hesperidin                         |
| Chemicals | S2323 |                                                                                                                                                                              |                 |         |                                           |
| Selleck   |       | c1([N+](=O)[O-])ccc(C2C(C(=O)OCCN3CCN(C(c4cccc4)c5ccccc5)CC3)=C(C)NC(C)=C2C(OC)=O)c1.Cl.Cl                                                                                   | C35H40Cl2N4O6   | 683.621 | Manidipine 2HCl                           |
| Chemicals | S2482 |                                                                                                                                                                              |                 |         |                                           |
| Selleck   |       | c1(C(C)=O)ccc(OC)cc1O                                                                                                                                                        | C9H10O3         | 166.174 | Paeonol                                   |
| Chemicals | S2339 |                                                                                                                                                                              |                 |         |                                           |
| Selleck   |       | c1(C(C)C)C(C)cc(C)c(CC2=NCCN2)c(C)c1O.Cl                                                                                                                                     | C16H25ClN2O     | 296.835 | Oxymetazoline HCl                         |
| Chemicals | S2495 |                                                                                                                                                                              |                 |         |                                           |
| Selleck   |       | [C@H]1(C)O[C@@H](Oc2c(CO)cccc2)[C@H](O)[C@@H](O)[C@@H]1O                                                                                                                     | C13H18O7        | 286.278 | Salicin                                   |
| Chemicals | S2351 |                                                                                                                                                                              |                 |         |                                           |

|           |       |                                                                                                                                                                                                                                                                                     |               |         |                          |  |  |
|-----------|-------|-------------------------------------------------------------------------------------------------------------------------------------------------------------------------------------------------------------------------------------------------------------------------------------|---------------|---------|--------------------------|--|--|
| Selleck   |       |                                                                                                                                                                                                                                                                                     |               |         |                          |  |  |
| Chemicals | S2504 | <chem>O1[C@H](n2nc(C(=O)N)nc2)[C@H](O)[C@H](O)[C@H]1CO</chem>                                                                                                                                                                                                                       | C8H12N4O5     | 244.205 | Ribavirin                |  |  |
| Selleck   |       |                                                                                                                                                                                                                                                                                     |               |         | Taxifolin                |  |  |
| Chemicals | S2366 | <chem>c1(O)cc2c(C(=O)[C@H](O)[C@@H](c3ccc(O)c(O)c3)O2)c(O)c1</chem>                                                                                                                                                                                                                 | C15H12O7      | 304.252 | (Dihydroquercetin)       |  |  |
| Selleck   |       |                                                                                                                                                                                                                                                                                     |               |         |                          |  |  |
| Chemicals | S2522 | <chem>c1(O)cc([C@H](CNC)O)ccc1O</chem>                                                                                                                                                                                                                                              | C9H13NO3      | 183.204 | L-Adrenaline             |  |  |
| Selleck   |       |                                                                                                                                                                                                                                                                                     |               |         |                          |  |  |
| Chemicals | S2379 | <chem>[C@H]1(O)[C@H](O)[C@]([H])(O)[C@@H]2[C@H](CO)O[C@@]([H])(O)[C@@H]3CC[C@@]4(C)C(=CC[C@]5([H])[C@@]4([H])CC[C@@]6(C)[C@@]5([H])C[C@@]7([H])[C@@]6([H])[C@@H](C)[C@@]8CC[C@@H](C)CO8)O7C3)[C@H](O)[C@]9([H])O[C@@H](C)[C@H](O)[C@@H](O)[C@H]9O)[C@H]2O)O[C@@H](C)[C@@H]1O</chem> | C45H72O16     | 869.044 | Dioscin                  |  |  |
| Selleck   |       |                                                                                                                                                                                                                                                                                     |               |         |                          |  |  |
| Chemicals | S2536 | <chem>c1(Cl)cc(Cl)c(COC(Cn2cncc2)c3ccc(Cl)cc3Cl)cc1</chem>                                                                                                                                                                                                                          | C18H14Cl4N2O  | 416.129 | Miconazole               |  |  |
| Selleck   |       |                                                                                                                                                                                                                                                                                     |               |         |                          |  |  |
| Chemicals | S2392 | <chem>c(OCCO1)cc([C@@H]2[C@@]3([H])[C@@]([H])([C@@H](c4ccc5c(OCCO5)C4)OC3)CO2)cc6)c16</chem>                                                                                                                                                                                        | C20H18O6      | 354.353 | Sesamin                  |  |  |
| Selleck   |       |                                                                                                                                                                                                                                                                                     |               |         |                          |  |  |
| Chemicals | S2552 | <chem>c1cc2c(C(Cc3ccc(Cl)cc3)=NN(C4CCCN(C)CC4)C2=O)cc1.Cl</chem>                                                                                                                                                                                                                    | C22H25Cl2N3O  | 418.359 | Azelastine HCl           |  |  |
| Selleck   |       |                                                                                                                                                                                                                                                                                     |               |         |                          |  |  |
| Chemicals | S2405 | <chem>C(C[C@@]1([H])N(C[C@@]2([H])[C@]([H])(N3CC2)[C@@]1([H])CCC3)C4=O)=C4</chem>                                                                                                                                                                                                   | C15H22N2O     | 246.348 | Sophocarpine             |  |  |
| Selleck   |       |                                                                                                                                                                                                                                                                                     |               |         |                          |  |  |
| Chemicals | S2565 | <chem>c1(O)ccc([C@@H](N)C(=O)N[C@@H]2C(=O)N3[C@]2([H])SC(C)(C)[C@H]3C([O-])=O)cc1.[Na+]</chem>                                                                                                                                                                                      | C16H18N3NaO5S | 387.386 | Amoxicillin Sodium       |  |  |
| Selleck   |       |                                                                                                                                                                                                                                                                                     |               |         |                          |  |  |
| Chemicals | S2415 | <chem>[C@@H]1(O)CO[C@@H](O[C@H]2CC[C@]([C3]([C@@]3CC[C@@]4(C)[C@@]5(C)C[C@H](O)[C@@]4([H])[C@@]6(C)O[C@@H](C(O)(C)C)CC6)[C@]57([H])[C@@]([H])([C@@H](O[C@H]8[C@@H](O)[C@@H](O)[C@H]9O)[C@H](CO)O8)C7)C2(C)[C@H](O)[C@H]1O</chem>                                                    | C41H68O14     | 784.97  | Astragaloside A          |  |  |
| Selleck   |       |                                                                                                                                                                                                                                                                                     |               |         |                          |  |  |
| Chemicals | S2584 | <chem>C1=C[C@@]2(C)C(C[C@]3([H])[C@@]2(F)[C@]([H])(O)C[C@@]4(C)[C@@]3([H])C[C@]([H])(C)[C@@]4(O)C(=O)CC)C(=O)CCl)=CC1=O</chem>                                                                                                                                                      | C25H32ClFO5   | 466.97  | Clobetasol propionate    |  |  |
| Selleck   |       |                                                                                                                                                                                                                                                                                     |               |         |                          |  |  |
| Chemicals | S2453 | <chem>c1(O)ccc(CNNC(=O)C(CO)N)c(O)c1O.Cl</chem>                                                                                                                                                                                                                                     | C10H16ClN3O5  | 293.704 | Benserazide HCl          |  |  |
| Selleck   |       |                                                                                                                                                                                                                                                                                     |               |         |                          |  |  |
| Chemicals | S2602 | <chem>Cc1c(CC(=O)OCC(=O)O)c2c(ccc(OC)c2)n1C(c3ccc(Cl)cc3)=O</chem>                                                                                                                                                                                                                  | C21H18ClNO6   | 415.824 | Acemetacin               |  |  |
| Selleck   |       |                                                                                                                                                                                                                                                                                     |               |         |                          |  |  |
| Chemicals | S2613 | <chem>c1(C(=C(Cl)Cl)Cl)cc(N)c(S(=O)(=O)N)cc1S(=O)(=O)N</chem>                                                                                                                                                                                                                       | C8H8Cl3N3O4S2 | 380.656 | Clorsulon                |  |  |
| Selleck   |       |                                                                                                                                                                                                                                                                                     |               |         |                          |  |  |
| Chemicals | S2758 | <chem>C1(=O)O[C@H](CO C)[C@@]2(C)c(c3C(=O)C4=C2[C@@H](OC(C)=O)C[C@@]([C]([C@]45[H])C(=O)CC5)c1cc3</chem>                                                                                                                                                                            | C23H24O8      | 428.432 | Wortmannin               |  |  |
| Selleck   |       |                                                                                                                                                                                                                                                                                     |               |         | Omecamtiv mecarbil (CK-  |  |  |
| Chemicals | S2623 | <chem>c1(C)ccc(NC(=O)Nc2cccc(CN3CCN(C(C)C(=O)CC3)c2F)cn1</chem>                                                                                                                                                                                                                     | C20H24FN5O3   | 401.435 | 1827452)                 |  |  |
| Selleck   |       |                                                                                                                                                                                                                                                                                     |               |         | Dalcetrapib (JTT-705,    |  |  |
| Chemicals | S2772 | <chem>c1c(NC(=O)C2(CC(CC)CC)CCCC2)c(SC(=O)C(C)C)ccc1</chem>                                                                                                                                                                                                                         | C23H35NO2S    | 389.595 | RO4607381)               |  |  |
| Selleck   |       |                                                                                                                                                                                                                                                                                     |               |         |                          |  |  |
| Chemicals | S2633 | <chem>c1(Cl)c(C#N)c(O[C@H](O)CNC(C)(C)Cc2cc3c(ccc3)cc2)ccc1</chem>                                                                                                                                                                                                                  | C24H25ClN2O2  | 408.921 | NPS-2143                 |  |  |
| Selleck   |       |                                                                                                                                                                                                                                                                                     |               |         |                          |  |  |
| Chemicals | S2781 | <chem>o1c(c2sc(CO)cc2)ccc1c3sc(CO)cc3</chem>                                                                                                                                                                                                                                        | C14H12O3S2    | 292.373 | RITA (NSC 652287)        |  |  |
| Selleck   |       |                                                                                                                                                                                                                                                                                     |               |         | 5-hydroxymethyl          |  |  |
| Chemicals | S2659 | <chem>c1c([C@@H](CCN(C(C)C(C)C)c2cc(CO)ccc2O)cccc1</chem>                                                                                                                                                                                                                           | C22H31NO2     | 341.487 | Tolterodine (PNU 200577, |  |  |
| Selleck   |       |                                                                                                                                                                                                                                                                                     |               |         | 5-HMT, 5-HM)             |  |  |
| Chemicals | S2792 | <chem>c(cc(C(F)(F)F)cc1)[C@H](N(Cc2cc(C(F)(F)F)cc(C(F)(F)F)c2)C(OC)=O)C[C@@H](CC)N3C(=O)OCC)c13</chem>                                                                                                                                                                              | C26H25F9N2O4  | 600.473 | Torcetrapib              |  |  |
| Selleck   |       |                                                                                                                                                                                                                                                                                     |               |         |                          |  |  |
| Chemicals | S2670 | <chem>c1cc(C[C@H](N)COc2ncc(c3ccc4c(c(C)n[nH]4)c3)c2)ccc1</chem>                                                                                                                                                                                                                    | C22H22N4O     | 358.436 | A-674563                 |  |  |
| Selleck   |       |                                                                                                                                                                                                                                                                                     |               |         |                          |  |  |
| Chemicals | S2808 | <chem>C1N(C(=O)[C@H](CNC(C)C)c2ccc(Cl)cc2)CCN(C3ncnc4c3[C@H](C)C[C@@H]4O)C1</chem>                                                                                                                                                                                                  | C24H32ClN5O2  | 457.996 | GDC-0068                 |  |  |
| Selleck   |       |                                                                                                                                                                                                                                                                                     |               |         |                          |  |  |
| Chemicals | S2683 | <chem>C1(=O)Nc2c(cc(Cl)cc2)C(N[C@@H]3CN(CCC34)CC4)=C1c5[nH]c6c(cccc6)n5</chem>                                                                                                                                                                                                      | C23H22ClN5O   | 419.907 | CHIR-124                 |  |  |
| Selleck   |       |                                                                                                                                                                                                                                                                                     |               |         |                          |  |  |
| Chemicals | S3001 | <chem>N1C(=O)N([C@@H]2[C@@H](F)[C@@H](O)[C@H](CO)O2)C=C(C)C1=O</chem>                                                                                                                                                                                                               | C10H13FN2O5   | 260.219 | Clevudine                |  |  |
| Selleck   |       |                                                                                                                                                                                                                                                                                     |               |         |                          |  |  |
| Chemicals | S2697 | <chem>c1(c2c(O)cccc2)ccc(c3c4c(NC(=O)C(C#N)=C4O)sc3)cc1</chem>                                                                                                                                                                                                                      | C20H12N2O3S   | 360.386 | A-769662                 |  |  |
| Selleck   |       |                                                                                                                                                                                                                                                                                     |               |         |                          |  |  |
| Chemicals | S3022 | <chem>[C@@](C)(C(=O)[C@H](OC)C(C)C)[C@@]1(O)[C@@H]2OC(c3cccc3)=O=C(C)[C@@H](OC(=O)[C@H](O)[C@H](c4cccc4)NC(=O)OC(C)(C)C)C1)([C@H](OC)C[C@]5([H])[C@@]6(O)C(=O)CO5)[C@]26[H]</chem>                                                                                                  | C45H57NO14    | 835.932 | Cabazitaxel              |  |  |
| Selleck   |       |                                                                                                                                                                                                                                                                                     |               |         |                          |  |  |
| Chemicals | S2718 | <chem>C1CC(NC(=O)c2cc(c3cccc(S(=O)(=O)CC)c3)c4c([nH]c5c4cc(C)cn5)c2)CCN1C</chem>                                                                                                                                                                                                    | C28H32N4O3S   | 504.644 | TAK-901                  |  |  |
| Selleck   |       |                                                                                                                                                                                                                                                                                     |               |         |                          |  |  |
| Chemicals | S3117 | <chem>c1c(C(O)(C(=O)OCC#CCN(CC)CC)C2CCCC2)cccc1.Cl</chem>                                                                                                                                                                                                                           | C22H32ClNO3   | 393.947 | Oxybutynin chloride      |  |  |
| Selleck   |       |                                                                                                                                                                                                                                                                                     |               |         |                          |  |  |
| Chemicals | S2730 | <chem>c1cc2c(nc(n3c4c(cc(OCC5(C)CO5)cc4)nc3)cc2)c(N6CCC(N)CC6)c1</chem>                                                                                                                                                                                                             | C26H29N5O2    | 443.541 | Crenolanib (CP-868596)   |  |  |

|           |       |                                                                                                                                                                                                    |                |         |                                |
|-----------|-------|----------------------------------------------------------------------------------------------------------------------------------------------------------------------------------------------------|----------------|---------|--------------------------------|
| Selleck   |       | <chem>c1(C=[N+](O-))C(C)(C)C(S([O-])(=O)=O)cc(S(=O)(=O)[O-])cc1.[Na+].[Na+]</chem>                                                                                                                 | C11H13NNa2O7S2 | 381.333 | NXV-059                        |
| Chemicals | S6002 |                                                                                                                                                                                                    |                |         |                                |
| Selleck   |       | <chem>c1(C(C)(C)C#N)cc(C(=O)Nc2cc(Nc3ccc4c(C(=O)N(C)C=N4)c3(C)cc2)ccc1</chem>                                                                                                                      | C27H25N5O2     | 451.52  | AZ 628                         |
| Chemicals | S2746 |                                                                                                                                                                                                    |                |         |                                |
| Selleck   |       | <chem>c1(O)ccc(c2c(O)ccc(CC=C)c2)cc1CC=C</chem>                                                                                                                                                    | C18H18O2       | 266.334 | Honokiol                       |
| Chemicals | S2310 |                                                                                                                                                                                                    |                |         |                                |
| Selleck   |       | <chem>c1(OC[C@H](C)(CC(C)CC)c(OC[C@H](C)(CC(C)CC)c(OC[C@H](C)(CC(C)CC)ccc1.[I-].[I-].[I-]</chem>                                                                                                   | C30H60I3N3O3   | 891.529 | Gallamine Triethiodide         |
| Chemicals | S2471 |                                                                                                                                                                                                    |                |         |                                |
| Selleck   |       | <chem>c1(O)cc2c(C(=O)C(O)=C(c3c(O)cc(O)cc3)O2)c(O)c1.O</chem>                                                                                                                                      | C15H12O8       | 320.251 | Morin Hydrate                  |
| Chemicals | S2325 |                                                                                                                                                                                                    |                |         |                                |
| Selleck   |       | <chem>n1ccc(C(C=C(C#N)C(=O)N2)=C2C)cc1</chem>                                                                                                                                                      | C12H9N3O       | 211.219 | Milrinone                      |
| Chemicals | S2484 |                                                                                                                                                                                                    |                |         |                                |
| Selleck   |       | <chem>C1C=C(C)CC[C@@H]2[C@H](OC(=O)C2=C)[C@H]3[C@](C)(O3)C1</chem>                                                                                                                                 | C15H20O3       | 248.318 | (-)-Parthenolide               |
| Chemicals | S2341 |                                                                                                                                                                                                    |                |         |                                |
| Selleck   |       | <chem>c1cc(C=CC(=O)O)ccc1Cn2ccnc2</chem>                                                                                                                                                           | C13H12N2O2     | 228.247 | Ozagrel                        |
| Chemicals | S2496 |                                                                                                                                                                                                    |                |         |                                |
| Selleck   |       | <chem>[C@@]([H])([H])(CC(=O)O)O1([C@@]2(C)[C@]([H])(C)(C)CCC2)CC3)[C@]13C</chem>                                                                                                                   | C16H26O2       | 250.376 | Sciareolide                    |
| Chemicals | S2355 |                                                                                                                                                                                                    |                |         |                                |
| Selleck   |       | <chem>[C@@]1(C)(O)[C@H](O)[C@@H](C)C(=NOCOCOC)[C@H](C)C[C@](O)(C)[C@H](O)[C@@H]2O[C@H](C)C[C@H](N(C)C)[C@H]2O)[C@@H](C)[C@@H](O)[C@H]3C[C@](O)(C)[C@H](O)[C@H](C)O3)[C@@H](C)C(=O)O[C@H]1CC</chem> | C41H76N2O15    | 837.047 | Roxithromycin                  |
| Chemicals | S2506 |                                                                                                                                                                                                    |                |         |                                |
| Selleck   |       | <chem>c1(O)cc2c(C(Cc3cc(OC)c(OC)cc3)NCC2)cc1OC.Cl</chem>                                                                                                                                           | C20H26ClNO4    | 379.878 | Tetrahydropapaverine HCl       |
| Chemicals | S2367 |                                                                                                                                                                                                    |                |         |                                |
| Selleck   |       | <chem>c1cc2c(C(=O)C(=C3O)[C@]([H])([C@@H](O)[C@]4([H])[C@@]3(O)C(=O)C(C(=O)N)=C(O)[C@@H]4N(C)C)C2=C)c(O)c1.Cl</chem>                                                                               | C22H23ClN2O8   | 478.88  | Methacycline HCl               |
| Chemicals | S2527 |                                                                                                                                                                                                    |                |         |                                |
| Selleck   |       | <chem>c1(O)cc2c(C(=O)C=C(c3cc(O)c(OC)cc3)O2)c(O)c1</chem>                                                                                                                                          | C16H12O6       | 300.263 | Diosmetin                      |
| Chemicals | S2380 |                                                                                                                                                                                                    |                |         |                                |
| Selleck   |       | <chem>n1(c(C)nc1[N+])(=O)[O-])CC(O)C</chem>                                                                                                                                                        | C7H11N3O3      | 185.181 | Secnidazole                    |
| Chemicals | S2537 |                                                                                                                                                                                                    |                |         |                                |
| Selleck   |       | <chem>c1(O)cc2c(C(=O)C[C@@H](c3ccc(O)cc3)O2)c(O)c1</chem>                                                                                                                                          | C15H12O5       | 272.253 | Naringenin                     |
| Chemicals | S2394 |                                                                                                                                                                                                    |                |         |                                |
| Selleck   |       | <chem>c1(O)c(O)c2c(C=CC(=O)O2)cc1</chem>                                                                                                                                                           | C9H6O4         | 178.142 | Daphnetin                      |
| Chemicals | S2554 |                                                                                                                                                                                                    |                |         |                                |
| Selleck   |       | <chem>c1cc2c(C(=O)c3c(cc(C)cc3O)C2=O)c(O)c1</chem>                                                                                                                                                 | C15H10O4       | 254.238 | Chrysophanic Acid              |
| Chemicals | S2406 |                                                                                                                                                                                                    |                |         |                                |
| Selleck   |       | <chem>c1cc(C(CNC(C)C)O)cc(O)c1O.Cl</chem>                                                                                                                                                          | C11H18ClNO3    | 247.719 | Isoprenaline HCl               |
| Chemicals | S2566 |                                                                                                                                                                                                    |                |         |                                |
| Selleck   |       | <chem>[C@H]1(O)C[C@@]2(C)[C@]([H])(C(=O)C=C3[C@@]2([H])CC[C@@]4(C)[C@@]3(O)CC[C@H]4[C@](O)(C)[C@H](O)CCC(C)(O)C)[C@H]1O</chem>                                                                     | C27H44O7       | 480.634 | 20-Hydroxyecdysone             |
| Chemicals | S2417 |                                                                                                                                                                                                    |                |         |                                |
| Selleck   |       | <chem>C(OC)(=O)C=CC(OC)=O</chem>                                                                                                                                                                   | C6H8O4         | 144.125 | Dimethyl Fumarate              |
| Chemicals | S2586 |                                                                                                                                                                                                    |                |         |                                |
| Selleck   |       | <chem>[N+](C)(C)(C)CC(C)OC(=O)N.[Cl-]</chem>                                                                                                                                                       | C7H17ClN2O2    | 196.675 | Bethanechol chloride           |
| Chemicals | S2455 |                                                                                                                                                                                                    |                |         |                                |
| Selleck   |       | <chem>c1(O)cc2c(SC(=O)O2)cc1</chem>                                                                                                                                                                | C7H4O3S        | 168.17  | Tioxolone                      |
| Chemicals | S2603 |                                                                                                                                                                                                    |                |         |                                |
| Selleck   |       | <chem>N1(C)CC(C(=O)OC)=CCC1.Br</chem>                                                                                                                                                              | C8H14BrNO2     | 236.106 | Arecoline                      |
| Chemicals | S2614 |                                                                                                                                                                                                    |                |         |                                |
| Selleck   |       | <chem>c1c(C(=O)NO)cnc(N(Cc2sc3c(nc4cnc(OC)cc4)nc3N5CCOCC5)c2)C)n1</chem>                                                                                                                           | C23H24N8O4S    | 508.553 | CUDC-907                       |
| Chemicals | S2759 |                                                                                                                                                                                                    |                |         |                                |
| Selleck   |       | <chem>n1c(N)c2n(c([C@H]3CC[C@H](C(O)=O)CC3)nc2c4cc5c(c(OC)ccc5)[nH]4)n</chem>                                                                                                                      | C21H22N6O3     | 406.438 | OSI-027                        |
| Chemicals | S2624 |                                                                                                                                                                                                    |                |         |                                |
| Selleck   |       | <chem>N(c1cccc1Br)C(N[C@@H]2CCN(c3ncc(C(F)(F)F)cc3)C2)=O</chem>                                                                                                                                    | C17H16BrF3N4O  | 429.234 | SB705498                       |
| Chemicals | S2773 |                                                                                                                                                                                                    |                |         |                                |
| Selleck   |       | <chem>c1(NC(=O)Nc2cc(C(C)(C)C)nn2c3ccc4c(ccn4)c3)ccc(OC5ccnc(C(=O)NC)c5)cc1F</chem>                                                                                                                | C30H28FN7O3    | 553.587 | DCC-2036 (Rebastinib)          |
| Chemicals | S2634 |                                                                                                                                                                                                    |                |         |                                |
| Selleck   |       | <chem>c1cc2c(nc(N3CCOC[C@@H]3C)nc2N4CCOC[C@@H]4C)nc1c5cccc(C(=O)NC)c5</chem>                                                                                                                       | C25H30N6O3     | 462.544 | AZD2014                        |
| Chemicals | S2783 |                                                                                                                                                                                                    |                |         |                                |
| Selleck   |       | <chem>c1c(Cl)ccc(S(=O)(=O)[C@]2(c3cc(F)ccc3)CC[C@H](CCC(O)=O)CC2)c1</chem>                                                                                                                         | C21H21ClF2O4S  | 442.904 | MK-0752                        |
| Chemicals | S2660 |                                                                                                                                                                                                    |                |         |                                |
| Selleck   |       | <chem>[C@H]1(CO[P@](=O)(Oc2ccccc2)N[C@H](C)C(=O)OC(C)O[C@@H](N3C=CC(=O)NC3=O)[C@@](F)(C)[C@@H]1O</chem>                                                                                            | C22H29FN3O9P   | 529.453 | Sofosbuvir (PSI-7977, GS-7977) |
| Chemicals | S2794 |                                                                                                                                                                                                    |                |         |                                |
| Selleck   |       | <chem>c1(F)ccc(c2ccc(C=C3C(=O)NC(=O)S3)o2)c(O)c1</chem>                                                                                                                                            | C14H8FNO4S     | 305.281 | AS-252424                      |
| Chemicals | S2671 |                                                                                                                                                                                                    |                |         |                                |
| Selleck   |       | <chem>n1c(N)c2c(n(C(C)C)nc2c3ccc4c(nc(N)j4)c3)nc1</chem>                                                                                                                                           | C15H15N7O      | 309.326 | INK 128 (MLN0128)              |
| Chemicals | S2811 |                                                                                                                                                                                                    |                |         |                                |
| Selleck   |       | <chem>c1c(O)c(C(=O)c2cc(OC)c(OCN3CCOCC3)cc2)c(CC(=O)N(CCO)CCO)cc(C)cc1O</chem>                                                                                                                     | C30H42N2O9     | 574.662 | KW-2478                        |
| Chemicals | S2685 |                                                                                                                                                                                                    |                |         |                                |

|           |       |                                                                                                                                                                                         |                |         |                          |
|-----------|-------|-----------------------------------------------------------------------------------------------------------------------------------------------------------------------------------------|----------------|---------|--------------------------|
| Selleck   |       | [C@@H]1(NC(N)=N)[C@H](NC(=O)C)[C@]([H])([C@@H]([C@@H](CO)O)O)OC(C(O)=O)=C1                                                                                                              | C12H20N4O7     | 332.31  | Zanamivir                |
| Chemicals | S3007 |                                                                                                                                                                                         |                |         |                          |
| Selleck   |       |                                                                                                                                                                                         |                |         |                          |
| Chemicals | S2699 | n1cc(c2nc(N3CCOCC3)nc4c2CCN4S(=O)(=O)C)cnc1N                                                                                                                                            | C15H19N7O3S    | 377.421 | CH5132799                |
| Selleck   |       |                                                                                                                                                                                         |                |         |                          |
| Chemicals | S3023 | c1(CC(NO)=O)ccc(OCCCC)cc1                                                                                                                                                               | C12H17NO3      | 223.268 | Bufexamac                |
| Selleck   |       |                                                                                                                                                                                         |                |         |                          |
| Chemicals | S2719 | c1cnc(OC2ccc(Nc3nnc(c4cc(C)cs4)c5c3cccc5)cc2)c(c6ccnc(N)n6)c1                                                                                                                           | C28H21N7OS     | 503.578 | AMG-900                  |
| Selleck   |       |                                                                                                                                                                                         |                |         | Cabozantinib malate      |
| Chemicals | S4001 | c(cc(OC)c(OC)c1)(nccc2Oc3ccc(NC(=O)C4(CC4)C(=O)Nc5ccc(F)cc5)cc3)c12.C(O)(=O)C[C@@H](C(O)=O)O                                                                                            | C32H30FN3O10   | 635.593 | (XL184)                  |
| Selleck   |       |                                                                                                                                                                                         |                |         |                          |
| Chemicals | S2731 | c1(OC2CCN(C)CC2)ccc(Nc3ncc4c(N(C5CCCC5)C(=O)N4C)n3)c(OC)c1                                                                                                                              | C24H32N6O3     | 452.549 | AZ 3146                  |
| Selleck   |       |                                                                                                                                                                                         |                |         |                          |
| Chemicals | S6003 | c1c(C(O)=O)cccc1c2nc(c3c(F)cccc3)on2                                                                                                                                                    | C15H9FN2O3     | 284.242 | Ataluren (PTC124)        |
| Selleck   |       |                                                                                                                                                                                         |                |         |                          |
| Chemicals | S2747 | N1(CC(O)(C)C)C(C)=C(C(Nc2ncc(OC3c(c4ncc3)ccc(OC)c4)cc2)=O)C(=O)N1c5cccc5                                                                                                                | C30H29N5O5     | 539.582 | AMG-458                  |
| Selleck   |       |                                                                                                                                                                                         |                |         | Hydoxychoic acid         |
| Chemicals | S2311 | C1C[C@@]2(C)[C@]([H])([C@@H](O)C[C@]3([H])(C@@)2([H])CC[C@@]4(C)[C@@]3([H])CC[C@H]4[C@@H]([C@@H](CCC(=O)O)O)C)[C@@H]1O                                                                  | C24H40O4       | 392.572 | (HDCA)                   |
| Selleck   |       |                                                                                                                                                                                         |                |         |                          |
| Chemicals | S2473 | c1c(O)ccc([C@H](CC)[C@@H](c2ccc(OC)c2)CC)c1                                                                                                                                             | C18H22O2       | 270.366 | Hexestrol                |
| Selleck   |       |                                                                                                                                                                                         |                |         |                          |
| Chemicals | S2326 | c1(O)cc2c(C(=O)C(O)=C(c3cc(O)c(O)c(O)O2)c(O)c1                                                                                                                                          | C15H10O8       | 318.235 | Myricetin                |
| Selleck   |       |                                                                                                                                                                                         |                |         |                          |
| Chemicals | S2485 | c1c(O)c2c(C(=O)c3c(c(NCCNCCO)ccc3NCCNCCO)C2=O)c(O)c1.Cl.Cl                                                                                                                              | C22H30Cl2N4O6  | 517.403 | Mitoxantrone HCl         |
| Selleck   |       |                                                                                                                                                                                         |                |         |                          |
| Chemicals | S2342 | c1(O)cc(O)c(C(=O)CCc2ccc(O)cc2)c(O)c1                                                                                                                                                   | C15H14O5       | 274.269 | Phloretin                |
| Selleck   |       |                                                                                                                                                                                         |                |         |                          |
| Chemicals | S2497 | [C@H]1([N+](C)CCCC2)C[C@@]3(C)[C@@]([H])(CC[C@]4([H])([C@@]3([H])CC[C@@]5(C)[C@@]4([H])C[C@H]([N+](C)CCCC6)[C@H]5OC(=O)C)C[C@@]4([H])O)C(=O)C.[Br-].[Br-]                               | C35H60Br2N2O4  | 732.67  | Pancuronium dibromide    |
| Selleck   |       |                                                                                                                                                                                         |                |         |                          |
| Chemicals | S2356 | C1=C(C(O)=O)C[C@@H](O)C(O)C1O                                                                                                                                                           | C7H10O5        | 174.151 | Shikimic Acid            |
| Selleck   |       |                                                                                                                                                                                         |                |         |                          |
| Chemicals | S2508 | O([C@@H]1C[C@@]([H])(N(C)[C@@]2([H])C1)[C@]3([H])(C@@)2([H])O3)C(=O)[C@H](CO)c4cccc4.Br                                                                                                 | C17H22BrNO4    | 384.265 | Scopolamine HBr          |
| Selleck   |       |                                                                                                                                                                                         |                |         |                          |
| Chemicals | S2370 | C1C[C@@]2(C)[C@@]([H])(CC[C@]3(C)[C@@]2([H])CC=C4[C@@]3(C)CCC5[C@]4([H])([C@H](C)[C@H](C)C[C@H]5C(O)=O)C(C)[C@H]1O                                                                      | C30H48O3       | 456.7   | Ursolic Acid             |
| Selleck   |       |                                                                                                                                                                                         |                |         |                          |
| Chemicals | S2528 | C1CC(C2=CC(C)=CC(=O)N2O)CCC1                                                                                                                                                            | C12H17NO2      | 207.269 | Ciclopirox               |
| Selleck   |       |                                                                                                                                                                                         |                |         |                          |
| Chemicals | S2381 | OC[C@@H](O)[C@@H](O)[C@H](O)[C@H](O)CO                                                                                                                                                  | C6H14O6        | 182.172 | D-Mannitol               |
| Selleck   |       |                                                                                                                                                                                         |                |         |                          |
| Chemicals | S2542 | c1ccc(CCNC(=N)NC(N)=N)cc1.Cl                                                                                                                                                            | C10H16ClN5     | 241.721 | Phenformin HCl           |
| Selleck   |       |                                                                                                                                                                                         |                |         |                          |
| Chemicals | S2395 | c1(C)cc2c(C(=O)c3c(cc(OC)cc3O)C2=O)c(O)c1                                                                                                                                               | C16H12O5       | 284.263 | Rheochrysidin            |
| Selleck   |       |                                                                                                                                                                                         |                |         |                          |
| Chemicals | S2555 | [C@@]1(C)(O)[C@H](O)[C@@H](O)C(=O)[C@H](C)C[C@@](C)(OC)[C@H](O)[C@H]2[C@@H](O)[C@@H](N(C)C)C[C@H](CO2)[C@@H](C)[C@@H](O)[C@H]3O[C@@H](C)[C@H](O)[C@@](OC)(C)C3)[C@@H](C)C(=O)O[C@@H]1CC | C38H69NO13     | 747.953 | Clarithromycin           |
| Selleck   |       |                                                                                                                                                                                         |                |         |                          |
| Chemicals | S2407 | C1(=C)C[C@](O)[C@]23[C@@]1([H])CC[C@H]2C)(O)[C@H](C(C)C)C3                                                                                                                              | C15H24O2       | 236.35  | Curcuml                  |
| Selleck   |       |                                                                                                                                                                                         |                |         | Medroxyprogesterone      |
| Chemicals | S2567 | C1C[C@@]2(C)C([C@@H](C)C[C@]3([H])(C@@]2([H])CC[C@@]4(C)[C@@]3([H])CC[C@]4(O)C(=O)C(C)=O)=CC1=O                                                                                         | C24H34O4       | 386.524 | acetate                  |
| Selleck   |       |                                                                                                                                                                                         |                |         |                          |
| Chemicals | S2420 | C1N2[C@@]([H])([C@]3([H])C[C@@]([H])([C@@]4([H])C(CCCN4)=C3)C2)CCC1                                                                                                                     | C15H24N2       | 232.364 | Aloperine                |
| Selleck   |       |                                                                                                                                                                                         |                |         |                          |
| Chemicals | S2589 | [C@@H]1(O)[C@H](O)[C@H](O)[C@@H](CO)N(CCO)C1                                                                                                                                            | C8H17NO5       | 207.224 | Miglitol                 |
| Selleck   |       |                                                                                                                                                                                         |                |         |                          |
| Chemicals | S2457 | [C@H]1(O)[C@H](SC)O[C@H]([C@@H](NC([C@@H]2C[C@@H](CCC)N2C)=O)C(Cl)C)[C@H](O)[C@@H]1O.Cl                                                                                                 | C18H34Cl2N2O5S | 461.444 | Clindamycin HCl          |
| Selleck   |       |                                                                                                                                                                                         |                |         | Dehydroepiandrosterone   |
| Chemicals | S2604 | C1C[C@@]2(C)C(=CC[C@]3([H])(C@@]2([H])CC[C@@]4(C)[C@@]3([H])CCC4=O)C[C@H]1O                                                                                                             | C19H28O2       | 288.424 | (DHEA)                   |
| Selleck   |       |                                                                                                                                                                                         |                |         | Noradrenaline bitartrate |
| Chemicals | S2615 | c1(O)cc([C@@]([H])(O)CN)ccc1O.O.C(=O)[C@]([H])(O)[C@@]([H])(O)C(=O)O.O                                                                                                                  | C12H19NO10     | 337.28  | monohydrate              |
| Selleck   |       |                                                                                                                                                                                         |                |         |                          |
| Chemicals | S2760 | [C@H]1(CO)O[C@H](c2ccc(C)c(Cc3ccc(c4ccc(F)cc4)s3)c2)[C@H](O)[C@@H](O)[C@@H]1O                                                                                                           | C24H25FO5S     | 444.516 | Canagliflozin            |
| Selleck   |       |                                                                                                                                                                                         |                |         |                          |
| Chemicals | S2626 | c1c(OC[C@H]2OCCNC2)c(NC(=O)Nc3ncc(C)n3)cc(Br)c1C                                                                                                                                        | C18H22BrN5O3   | 436.303 | LY2603618                |
| Selleck   |       |                                                                                                                                                                                         |                |         |                          |
| Chemicals | S2775 | C(OC)(=O)Nc1[nH]c2c(ccc(C(c3sccc3)=O)c2)n1                                                                                                                                              | C14H11N3O3S    | 301.32  | Nocodazole               |

|           |       |                                                                                                                                                                                                |                |         |                            |
|-----------|-------|------------------------------------------------------------------------------------------------------------------------------------------------------------------------------------------------|----------------|---------|----------------------------|
| Selleck   |       |                                                                                                                                                                                                |                |         |                            |
| Chemicals | S2635 | <chem>n1c(N2CC(Cc3ccc(Cl)cc3)(N)CC2)c4c([nH]cc4)nc1</chem>                                                                                                                                     | C18H20ClN5     | 341.838 | CCT 128930                 |
| Selleck   |       | <chem>c(ccn1CCNC(C(C)(C)O)=O)(ncnc2Nc3cc(Cl)c(Oc4cc(C(F)(F)F)ccc4)cc3)c</chem>                                                                                                                 |                |         |                            |
| Chemicals | S2784 | 12                                                                                                                                                                                             | C26H25ClF3N5O3 | 547.957 | TAK-285                    |
| Selleck   |       | <chem>c1(N2CC(OC3C2)CC3)c4c(n(C5CCC6(OCCO6)CC5)nc4)nc(c7ccc(NC(NC)=O)cc7)n1</chem>                                                                                                             | C27H33N7O4     | 519.595 | WYE-125132 (WYE-132)       |
| Chemicals | S2795 | <chem>c1cc(C(=O)Nc2ccc(F)cc2F)ccc1OCCCC</chem>                                                                                                                                                 | C17H17F2NO2    | 305.319 | VU 0357121                 |
| Selleck   |       | <chem>C1(=O)C(C)=C2C(C(=O)N(C3CC3)C(=O)N2c4cccc(NC(=O)C)c4)=C(Nc5c(F)cc(I)cc5)N1C</chem>                                                                                                       | C26H23FIN5O4   | 615.395 | Trametinib<br>(GSK1120212) |
| Chemicals | S2814 | <chem>N1(C(Nc2nc(C)c(c3ccnc(C(C)(C)F)(F)F)c3)s2=O)CCC[C@@H]1C(N)=O</chem>                                                                                                                      | C19H22F3N5O2S  | 441.47  | BYL719                     |
| Selleck   |       | <chem>c1c(c2cc(F)c(CN3CCOCC3)c(F)c2)c4c(ncc(c5cnn(C6CCNCC6)c5)n4)cc1.Cl</chem>                                                                                                                 | C27H30Cl2F2N6O | 563.47  | NVP-BSK805 2HCl            |
| Chemicals | S2686 |                                                                                                                                                                                                |                |         |                            |
| Selleck   |       |                                                                                                                                                                                                |                |         |                            |
| Chemicals | S3008 | <chem>c1cc2c(Sc3c(cc(C(C)O)=O)C)cc3)CC2=O)cc1</chem>                                                                                                                                           | C17H14O3S      | 298.356 | Zaltoprofen                |
| Selleck   |       |                                                                                                                                                                                                |                |         |                            |
| Chemicals | S2700 | <chem>c1cc(c2cnc(C(C(=O)N)Cc3ccccc3)cc2)ccc1OCCN4CCOCC4</chem>                                                                                                                                 | C26H29N3O3     | 431.527 | KX2-391                    |
| Selleck   |       |                                                                                                                                                                                                |                |         |                            |
| Chemicals | S3025 | <chem>c1(CS(F)(=O)=O)cccc1</chem>                                                                                                                                                              | C7H7FO2S       | 174.193 | PMSF                       |
| Selleck   |       |                                                                                                                                                                                                |                |         |                            |
| Chemicals | S2720 | <chem>c1(N(C)C)cc(C(=O)Nc2ccc(C)c(NC(=O)C3ccc(F)cc3)c2)ccc1</chem>                                                                                                                             | C23H23N3O3     | 389.447 | ZM 336372                  |
| Selleck   |       | <chem>c1c(F)c(C[C@@H](N)CC(=O)N2CCn3c(nnc3C(F)(F)F)C2)cc(F)c1F.P(OO)</chem>                                                                                                                    |                |         | Sitagliptin phosphate      |
| Chemicals | S4002 | <chem>(=O)=O.[H].O</chem>                                                                                                                                                                      | C16H20F6N5O6P  | 523.324 | monohydrate                |
| Selleck   |       |                                                                                                                                                                                                |                |         |                            |
| Chemicals | S2735 | <chem>c1(c(c2cnn(C)c2)cn3)n3c(N)c(Br)c([C@@H]4CCCCN4)n1</chem>                                                                                                                                 | C15H18BrN7     | 376.254 | MK-8776 (SCH 900776)       |
| Selleck   |       |                                                                                                                                                                                                |                |         |                            |
| Chemicals | S6005 | <chem>c1cc(F)c(N(C(N)=O)c2ccc(C(=O)N)c(c3ccc(F)cc3F)n2)c(F)c1</chem>                                                                                                                           | C19H12F4N4O2   | 404.318 | VX-702                     |
| Selleck   |       | <chem>c1cc(c2c(OC)cc(F)c(C(C)C)c2)c(CN3[C@@H](C)[C@@H](c4cc(C(F)(F)F)cc(C(F)(F)F)c4)OC3=O)cc1C(F)(F)F</chem>                                                                                   | C30H25F10NO3   | 637.508 | Anacetrapib (MK-0859)      |
| Chemicals | S2748 | <chem>[C@@H]1(CO)OC(Oc2c(CC=C(C)C)c3c(C(=O)C)OC4[C@@H](O)[C@@H](O)[C@@H](O)[C@@H](O)C4)O4=C(c5ccc(OC)cc5)O3)c(O)c2[C@@H](O)[C@@H](O)[C@@H]1O</chem>                                            | C33H40O15      | 676.662 | Icariin                    |
| Selleck   |       |                                                                                                                                                                                                |                |         |                            |
| Chemicals | S2475 | <chem>n1ccc(c2cnccc2)nc1Nc3c(C)ccc(NC(c4ccc(CN5CCN(C)CC5)cc4)=O)c3</chem>                                                                                                                      | C29H31N7O      | 493.603 | Imatinib (ST1571)          |
| Selleck   |       |                                                                                                                                                                                                |                |         |                            |
| Chemicals | S2328 | <chem>C(N(CC)c1c(ccc(C)n1)C2=O)=C2C(=O)O</chem>                                                                                                                                                | C12H12N2O3     | 232.235 | Nalidixic acid             |
| Selleck   |       |                                                                                                                                                                                                |                |         |                            |
| Chemicals | S2486 | <chem>C1CN(C(=N)NC(=N)N)CCO1.Cl</chem>                                                                                                                                                         | C6H14ClN5O     | 207.661 | Moroxydine HCl             |
| Selleck   |       | <chem>c1(O)c(C(=O)CCc2ccc(O)cc2)c(O[C@@H]3[C@@H](O)[C@@H](O)[C@@H](O)[C@@H](CO)O3)cc(O)c1</chem>                                                                                               | C21H24O10      | 436.409 | Phlorizin                  |
| Chemicals | S2343 |                                                                                                                                                                                                |                |         |                            |
| Selleck   |       |                                                                                                                                                                                                |                |         |                            |
| Chemicals | S2498 | <chem>OCC(C)(C)[C@@]([H])(O)C(=O)NCCC(=O)O</chem>                                                                                                                                              | C9H17NO5       | 219.235 | D-Pantothenic acid         |
| Selleck   |       | <chem>[C@@H]1(CO)OC2c(cc([C@@H]3Oc4c(c(O)cc(O)c4)C(=O)[C@@H]3O)cc2)O[C@@H]1c5cc(OC)c(O)cc5</chem>                                                                                              | C25H22O10      | 482.436 | Silibinin                  |
| Chemicals | S2357 |                                                                                                                                                                                                |                |         |                            |
| Selleck   |       |                                                                                                                                                                                                |                |         |                            |
| Chemicals | S2509 | <chem>c1(C(O)CNC(C)C)ccc(NS(=O)(=O)C)cc1.Cl</chem>                                                                                                                                             | C12H21ClN2O3S  | 308.825 | Sotalol                    |
| Selleck   |       | <chem>[nH]1c2c(cccc2)c3c1[C@@]4([H])N(C[C@@]5([H])[C@@]([H])([C@@H](C(=O)OC)[C@@H](O)CC5)C4)CC3.Cl</chem>                                                                                      | C21H27ClN2O3   | 390.904 | Yohimbine HCl              |
| Chemicals | S2373 |                                                                                                                                                                                                |                |         |                            |
| Selleck   |       |                                                                                                                                                                                                |                |         |                            |
| Chemicals | S2529 | <chem>c1(O)cc(CCN)ccc1O.Cl</chem>                                                                                                                                                              | C8H12ClNO2     | 189.639 | Dopamine HCl               |
| Selleck   |       |                                                                                                                                                                                                |                |         |                            |
| Chemicals | S2384 | <chem>[C@](O)(Cc1c2cc(O)c(O)c1)(COc3c4ccc(O)c3O)[C@]24[H]</chem>                                                                                                                               | C16H14O6       | 302.279 | Hematoxylin                |
| Selleck   |       | <chem>N(C(=O)[C@@]1(NC(=O)C(c2csc(N)n2)=NO)[H])(C(C(=O)O)=C(CSC(=O)c3ccco3)CS4)[C@@]14[H].Cl</chem>                                                                                            | C19H18ClN5O7S3 | 560.024 | Ceftiofur HCl              |
| Chemicals | S2543 |                                                                                                                                                                                                |                |         |                            |
| Selleck   |       | <chem>[C@@H]1(CO)O[C@@H](OCCc2ccc(O)cc2)[C@@H](O)[C@@H](O)[C@@H]1O</chem>                                                                                                                      | C14H20O7       | 300.304 | Salidroside                |
| Chemicals | S2396 |                                                                                                                                                                                                |                |         |                            |
| Selleck   |       |                                                                                                                                                                                                |                |         |                            |
| Chemicals | S2556 | <chem>c1cc(N(C)CCOC2ccc(CC3C(=O)NC(=O)S3)cc2)nc1</chem>                                                                                                                                        | C18H19N3O3S    | 357.427 | Rosiglitazone              |
| Selleck   |       | <chem>c1cc([C@@H](NC(=O)C)C)=CC([C@@H](O)C(=O)O[C@@H]2C(C)=C3C(C)(C)[C@@](O)([C@@H](OC(=O)c4ccccc4)[C@@]5([H])[C@@](C)([C@@H](O)[C@@H]6[C@@]5(O)C(C)=O)CO6)C(=O)[C@@H]3O)C(C(=O)C2)ccc1</chem> | C45H53NO14     | 831.901 | Cephalomannine             |
| Chemicals | S2408 |                                                                                                                                                                                                |                |         |                            |
| Selleck   |       |                                                                                                                                                                                                |                |         |                            |
| Chemicals | S2569 | <chem>c1(O)cc([C@@]([H])(O)CNC)ccc1.Cl</chem>                                                                                                                                                  | C9H14ClNO2     | 203.666 | Phenylephrine HCl          |
| Selleck   |       |                                                                                                                                                                                                |                |         |                            |
| Chemicals | S2422 | <chem>c1cc2c(OC=C(c3ccccc3)C2=O)cc1OC(C)C</chem>                                                                                                                                               | C18H16O3       | 280.318 | Ipriflavone (Osteofix)     |
| Selleck   |       |                                                                                                                                                                                                |                |         |                            |
| Chemicals | S2593 | <chem>C(N1c2c(cc(Cl)cc2)C(O)CCC1)(=O)c3ccc(NC(c4c(C)cccc4)=O)cc3C</chem>                                                                                                                       | C26H25ClN2O3   | 448.941 | Tolvaptan                  |

|           |       |                                                                                                                           |               |         |                             |
|-----------|-------|---------------------------------------------------------------------------------------------------------------------------|---------------|---------|-----------------------------|
| Selleck   |       |                                                                                                                           |               |         |                             |
| Chemicals | S2458 | <chem>c1c(Cl)c(NC2=NCCN2)c(Cl)cc1.Cl</chem>                                                                               | C9H10Cl3N3    | 266.555 | Clonidine HCl               |
| Selleck   |       |                                                                                                                           |               |         |                             |
| Chemicals | S2605 | <chem>C1(=O)C(C)=C(CCCCCCCCCO)C(=O)C(O)C=C1OC</chem>                                                                      | C19H30O5      | 338.439 | Idebenone                   |
| Selleck   |       |                                                                                                                           |               |         |                             |
| Chemicals | S2617 | <chem>N1(C[C@H](CO)O)C(=O)C2=C(N(C)C(=O)C(F)=C2Nc3c(F)cc(l)cc3)N=C1</chem>                                                | C17H15F2IN4O4 | 504.227 | TAK-733                     |
| Selleck   |       |                                                                                                                           |               |         |                             |
| Chemicals | S2761 | <chem>c1cc2n(c(Cc3cc4c(nc3c4)cc3)cn2)nc1c5cn(C)nc5</chem>                                                                 | C20H16N6      | 340.381 | NVP-BVU972                  |
| Selleck   |       |                                                                                                                           |               |         |                             |
| Chemicals | S2627 | <chem>c1cc(Cn2c3c(ccc3)c4c2CCN(C)C4)ccc1C(=O)NO.Cl</chem>                                                                 | C20H22ClN3O2  | 371.861 | Tubastatin A HCl            |
| Selleck   |       |                                                                                                                           |               |         |                             |
| Chemicals | S2776 | <chem>S(Cc1cccc1)CC(C)(CCCC(=O)O)SCc2cccc2</chem>                                                                         | C22H28O2S2    | 388.587 | CPI-613                     |
| Selleck   |       |                                                                                                                           |               |         |                             |
| Chemicals | S2636 | <chem>c1c(c2c(C)nc(NC(=O)N3CCC[C@H]3C(N)=O)s2)nc(C(C)(C)C)s1</chem>                                                       | C17H23N5O2S2  | 393.527 | A66                         |
| Selleck   |       |                                                                                                                           |               |         |                             |
| Chemicals | S2785 | <chem>o1c(c2ccc(Cl)cc2)ccc1C(Nc3cc(OC)cc(OC)c3)=O</chem>                                                                  | C19H16ClNO4   | 357.788 | A-803467                    |
| Selleck   |       |                                                                                                                           |               |         |                             |
| Chemicals | S2663 | <chem>c1(ccccc1O)N2CCN(CCN(C(=O)C3CCCC3)c4ncccc4)CC2.Cl.Cl.Cl</chem>                                                      | C25H37Cl3N4O2 | 531.946 | WAY-100635 Maleate          |
| Selleck   |       |                                                                                                                           |               |         |                             |
| Chemicals | S2796 | <chem>C(N[C@H](c1cccc1)C)(=O)C(C#N)=Cc2nc(Br)ccc2</chem>                                                                  | C17H14BrN3O   | 356.217 | WP1066                      |
| Selleck   |       | <chem>c1ccc(NC(=O)Nc2ccc(c3ccc(C([C@H]4[C@@H](C(=O)O)CCC4)=O)cc3)c2)cc1</chem>                                            | C26H24N2O4    | 428.48  | A922500                     |
| Chemicals | S2674 |                                                                                                                           |               |         |                             |
| Selleck   |       |                                                                                                                           |               |         |                             |
| Chemicals | S2820 | <chem>c1(N2CCOCC2)ccc(Nc3ncc(Cl)c(Nc4cccc4C(=O)NC)n3)c(OC)c1</chem>                                                       | C23H25ClN6O3  | 468.936 | TAE226 (NVP-TAE226)         |
| Selleck   |       |                                                                                                                           |               |         |                             |
| Chemicals | S2688 | <chem>n1c(N)c(C(=O)c2c(OC)ccc(F)c2F)cnc1NC3CCN(S(=O)(C)=O)CC3</chem>                                                      | C18H21F2N5O4S | 441.452 | R547                        |
| Selleck   |       |                                                                                                                           |               |         |                             |
| Chemicals | S3012 | <chem>c1(S(N)(=O)=O)cc(Nc2nccc(N(c3cc(c4cc3)nn(C)c4C)C)n2)ccc1C</chem>                                                    | C21H23N7O2S   | 437.518 | Pazopanib                   |
| Selleck   |       | <chem>n1c(Nc2c(C(NC)=O)c(F)ccc2)c3c([nH]cc3)nc1Nc4cc5c(CCN5C(CN(C)C)=O)cc4OC</chem>                                       | C27H29FN8O3   | 532.569 | GSK1838705A                 |
| Chemicals | S2703 |                                                                                                                           |               |         |                             |
| Selleck   |       |                                                                                                                           |               |         |                             |
| Chemicals | S3026 | <chem>c1(O)ccc(C=Cc2cc(O)cc(O)c2)cc1O</chem>                                                                              | C14H12O4      | 244.243 | Piceatannol                 |
| Selleck   |       |                                                                                                                           |               |         |                             |
| Chemicals | S2722 | <chem>c1cc(C(Nc2ccc3c(c(N)cc(C)n3)c2)=O)c(COc4ccc(CC)cc4)cc1.Cl</chem>                                                    | C26H26ClN3O2  | 447.957 | JTC-801                     |
| Selleck   |       |                                                                                                                           |               |         |                             |
| Chemicals | S4075 | <chem>c1c[n+ ]2c([S-][Zn+ 2]3([S-]c4[n+ ](cccc4)[O-]3)[O-]2)cc1</chem>                                                    | C10H8N2O2S2Zn | 317.722 | Zinc Pyrithione             |
| Selleck   |       | <chem>c1(OCCN2CCCC2)ccc(Nc3ncc(C)c(Nc4cc(S(=O)(=O)NC(C)(C)C)ccc4)n3)c1</chem>                                             | C27H36N6O3S   | 524.678 | TG101348 (SAR302503)        |
| Chemicals | S2736 |                                                                                                                           |               |         |                             |
| Selleck   |       | <chem>C1CC=C[C@@]2([H])[C@@]([H])([C]C@H](O)C2)[C@H](O)C=CC(=O)O[C@@H](C)C1</chem>                                        | C16H24O4      | 280.359 | Brefeldin A                 |
| Chemicals | S7046 |                                                                                                                           |               |         |                             |
| Selleck   |       | <chem>C(O)(=O)C=CC(O)=O.n1c(c2c3c(N(C)C(=O)N3c4ccc(N5CCNCC5)c(C(F)(F)F)c4)c1ccc(c6ccc(OC)nc6)c2</chem>                    | C32H29F3N6O6  | 650.604 | BGT226 (NVP-BGT226)         |
| Chemicals | S2749 |                                                                                                                           |               |         |                             |
| Selleck   |       |                                                                                                                           |               |         |                             |
| Chemicals | S2314 | <chem>c1(O)cc2c(C(=O)C(O)=Cc3ccc(O)cc3)O2)c(O)c1</chem>                                                                   | C15H10O6      | 286.236 | Kaempferol                  |
| Selleck   |       | <chem>c1c(N2CCN(c3ccc(N4C=NN(C(C)CC)C4=O)cc3)CC2)ccc(OC[C@H]5CO[C@@]([c6c(Cl)cc(Cl)cc6])(Cn7ncnc7)O5)c1</chem>            | C35H38Cl2N8O4 | 705.633 | Itraconazole                |
| Chemicals | S2476 |                                                                                                                           |               |         |                             |
| Selleck   |       | <chem>C1[C@@]2(C)[C@@]([H])(CC[C@@]3(C)[C@@]2([H])CC=C4[C@@]3(C)CCC5[C@@]4([H])CC(C)(C)[C@H]5C(O)=O)C(C)(C)[C@H]1O</chem> | C30H48O3      | 456.7   | Oleanolic Acid              |
| Chemicals | S2334 |                                                                                                                           |               |         |                             |
| Selleck   |       |                                                                                                                           |               |         |                             |
| Chemicals | S2487 | <chem>c(C(=O)OC1)(c(O)c(Cc(CCC(O)=O)C)c(OC)c2C)c12</chem>                                                                 | C17H20O6      | 320.337 | Mycophenolic acid           |
| Selleck   |       |                                                                                                                           |               |         |                             |
| Chemicals | S2344 | <chem>C1CCCN(C(=O)C=CC=Cc2ccc3c(OCO3)c2)C1</chem>                                                                         | C17H19NO3     | 285.338 | Piperine                    |
| Selleck   |       |                                                                                                                           |               |         |                             |
| Chemicals | S2499 | <chem>c1ccc(OC(C)N(Cc2cccc2)CC)cc1.Cl</chem>                                                                              | C18H23Cl2NO   | 340.287 | Phenoxybenzamine HCl        |
| Selleck   |       | <chem>c1(OC)ccc2c([C@@]34[C@@]([H])(C(=O)C)C(=O)C3)[C@@H](N(C)CC4)C2)c1O</chem>                                           | C19H23NO4     | 329.39  | Sinomenine                  |
| Chemicals | S2359 |                                                                                                                           |               |         |                             |
| Selleck   |       | <chem>[C@H]1(NC)[C@@H](O)[C@]2([H])[C@]([H])(O[C@]3(O)[C@@]([H])(O[C@H](C)CC3=O)O2)[C@@H](NC)[C@H]1O.Cl.Cl</chem>         | C14H26Cl2N2O7 | 405.271 | Spectinomycin HCl           |
| Chemicals | S2510 |                                                                                                                           |               |         |                             |
| Selleck   |       |                                                                                                                           |               |         |                             |
| Chemicals | S2374 | <chem>c1(O)cc2c([nH]cc2CC(N)C(=O)O)cc1</chem>                                                                             | C11H12N2O3    | 220.225 | 5-hydroxytryptophan (5-HTP) |
| Selleck   |       |                                                                                                                           |               |         |                             |
| Chemicals | S2531 | <chem>c1(OC)cc(C=O)c(OC)cc1OC</chem>                                                                                      | C10H12O4      | 196.2   | Asaraldehyde                |
| Selleck   |       |                                                                                                                           |               |         |                             |
| Chemicals | S2385 | <chem>c1cc(CCN(C)C)ccc1O</chem>                                                                                           | C10H15NO      | 165.232 | Hordenine                   |
| Selleck   |       |                                                                                                                           |               |         |                             |
| Chemicals | S2545 | <chem>[C@@]1([H])[C]C@H](O)C2N(C)[C@]2([H])[C@@]3([H])[C@]1([H])O3</chem>                                                 | C8H13NO2      | 155.194 | Scopine                     |
| Selleck   |       |                                                                                                                           |               |         |                             |
| Chemicals | S2399 | <chem>c1(O)cc2c(C(=O)[C@H](O)[C@@H](c3cc(O)c(O)c(O)c3)O2)c(O)c1</chem>                                                    | C15H12O8      | 320.251 | Dihydromyricetin            |

|           |       |                                                                                                                                                    |                 |         |                               |
|-----------|-------|----------------------------------------------------------------------------------------------------------------------------------------------------|-----------------|---------|-------------------------------|
| Selleck   |       |                                                                                                                                                    |                 |         |                               |
| Chemicals | S2557 | <chem>c1ccc2c(cccc2CN(C)CC=CC#CC(C)(C)C)c1.Cl</chem>                                                                                               | C21H26ClN       | 327.891 | Terbinafine HCl               |
| Selleck   |       |                                                                                                                                                    |                 |         |                               |
| Chemicals | S2409 | <chem>[C@@](C)(C(=O)[C@H](O)C(=C1C)C(C)[C@H](O)(C[C@@H]1O)[C@H]2OC(c3ccccc3)=O)([C@H](O)C[C@H]4([H])[C@@]5(O(C=O)C)CO4[C@@]25[H])</chem>           | C29H36O10       | 544.59  | 10-Deacetylbaicatin-III       |
| Selleck   |       |                                                                                                                                                    |                 |         |                               |
| Chemicals | S2574 | <chem>c1c(O)c2c([C@](O)(C)[C@@](C(=C3O)C2=O)([H])C[C@]4([H])[C@@]3(O)C(=O)C(C(=O)N)=C(O)[C@@]4([H])N(C)C)cc1.Cl</chem>                             | C22H25ClN2O8    | 480.895 | Tetracycline HCl              |
| Selleck   |       |                                                                                                                                                    |                 |         |                               |
| Chemicals | S2437 | <chem>c1cc2c(CN3[C@]([H])(c4c(cc(OC)c(OC)c4)CC3)C2)c(OC)c1OC</chem>                                                                                | C21H25NO4       | 355.427 | Rotundine                     |
| Selleck   |       |                                                                                                                                                    |                 |         |                               |
| Chemicals | S2594 | <chem>C(N1CCCC1=O)C(NCCN(C(C)C)C(C)C)=O</chem>                                                                                                     | C14H27N3O2      | 269.383 | Pramiracetam                  |
| Selleck   |       |                                                                                                                                                    |                 |         |                               |
| Chemicals | S2461 | <chem>C(N1c2c(cccc2)NC1=O)CCN3CCC(N4C(=O)Nc5c4ccc(Cl)c5)CC3</chem>                                                                                 | C22H24ClN5O2    | 425.911 | Domperidone                   |
| Selleck   |       |                                                                                                                                                    |                 |         |                               |
| Chemicals | S2606 | <chem>C1CC(=C([C@H](c2ccc(N(C)C)cc2)C[C@]3(C)[C@@]4([H])CC[C@@]3(C#CC)O)[C@]45[H])C(C5)=CC1=O</chem>                                               | C29H35NO2       | 429.594 | Mifepristone                  |
| Selleck   |       |                                                                                                                                                    |                 |         |                               |
| Chemicals | S2619 | <chem>c1ccc(COC(=O)N[C@@H](CC(C)C)C(=O)N[C@@H](CC(C)C)C(=O)N[C@@H](C=O)CC(C)C)cc1</chem>                                                           | C26H41N3O5      | 475.621 | MG-132                        |
| Selleck   |       |                                                                                                                                                    |                 |         |                               |
| Chemicals | S2765 | <chem>N1=C(C(NC)=O)c2c(c(O)c3n2[C@H](C)CN(CC)C3=O)C(=O)N1Cc4cc(Cl)c(F)cc4</chem>                                                                   | C21H21ClFN5O4   | 461.874 | MK-2048                       |
| Selleck   |       |                                                                                                                                                    |                 |         |                               |
| Chemicals | S2629 | <chem>c1(OC)cc(OC)c(Cl)cc1NC(=O)Nc2cc(C)on2</chem>                                                                                                 | C13H14ClN3O4    | 311.721 | PNU-120596                    |
| Selleck   |       |                                                                                                                                                    |                 |         |                               |
| Chemicals | S2777 | <chem>c1(C)cnc(c2c(Cl)cnc(N3CCN(C(CCS(=O)(=O)C)=O)CC3)c2)c(C)c1</chem>                                                                             | C20H25ClN4O3S   | 436.955 | PF-5274857                    |
| Selleck   |       |                                                                                                                                                    |                 |         |                               |
| Chemicals | S2638 | <chem>C(C(=O)c1c(c(c2c3c(c4c(cccc4)s3)ccc2)ccc1)O5)=C5N6CCOCC6</chem>                                                                              | C25H19NO3S      | 413.488 | NU7441 (KU-57788)             |
| Selleck   |       |                                                                                                                                                    |                 |         |                               |
| Chemicals | S2787 | <chem>N1(C)c(c2C(O)=C(C(N(CC)c3ccccc3)=O)C1=O)cccc2Cl</chem>                                                                                       | C19H17ClN2O3    | 356.803 | Laquinimod                    |
| Selleck   |       |                                                                                                                                                    |                 |         |                               |
| Chemicals | S2664 | <chem>C1CCCC(c2ccc(OC(C(O)=O)(C)CC)cc2)(c3ccc(OC(C(=O)O)(C)CC)cc3)C1</chem>                                                                        | C28H36O6        | 468.582 | Clinofibrate                  |
| Selleck   |       |                                                                                                                                                    |                 |         |                               |
| Chemicals | S2797 | <chem>C1c2c(ncc(Br)c2)[C@H](C3CCN(C(=O)CC4CCN(C(=O)N)CC4)CC3)c5c(cc(Cl)cc5Br)C1</chem>                                                             | C27H31Br2ClN4O2 | 638.822 | Lonafarnib                    |
| Selleck   |       |                                                                                                                                                    |                 |         |                               |
| Chemicals | S2677 | <chem>c1ccc(C(c2ccccc2)C(O)CN3CCN(c4cccc(Cl)c4)CC3)cc1.Cl.Cl</chem>                                                                                | C25H29Cl3N2O    | 479.87  | BRL-15572                     |
| Selleck   |       |                                                                                                                                                    |                 |         |                               |
| Chemicals | S2840 | <chem>S=C1N(c2cc(F)c(C(=O)NC)cc2)C3(CCC3)C(=O)N1c4cc(C(F)(F)F)c(C#N)n</chem>                                                                       | C21H15F4N5O2S   | 477.435 | ARN-509                       |
| Selleck   |       |                                                                                                                                                    |                 |         |                               |
| Chemicals | S2689 | <chem>c(cc[nH]1)(cc(c2nc(N3CCOCC3)c4c(n(C5CCN(Cc6cnccc6)CC5)nc4)n2)cc7)c</chem>                                                                    | C28H30N8O       | 494.591 | WAY-600                       |
| Selleck   |       |                                                                                                                                                    |                 |         |                               |
| Chemicals | S3017 | <chem>c1c(C(O)=O)c(OC(=O)C)ccc1</chem>                                                                                                             | C9H8O4          | 180.157 | Aspirin                       |
| Selleck   |       |                                                                                                                                                    |                 |         |                               |
| Chemicals | S2711 | <chem>c1(F)cc(CC(=O)N[C@@H](C)C(=O)N[C@@H]2C(=O)N(C)c3c(cccc3)c4c2</chem>                                                                          | C26H23F2N3O3    | 463.476 | YO-01027                      |
| Selleck   |       |                                                                                                                                                    |                 |         |                               |
| Chemicals | S3031 | <chem>c1cc2c(c(C)nc(CN3C(=O)c4c(nc(N5CCC[C@@H](N)C5)n4CC#CC)N(C)C3=O)n2)cc1</chem>                                                                 | C25H28N8O2      | 472.542 | Linagliptin                   |
| Selleck   |       |                                                                                                                                                    |                 |         |                               |
| Chemicals | S2726 | <chem>c1(N2C(=O)C(Br)=C(Oc3c(F)cc(F)cc3)C=C2C)cc(C(NC)=O)ccc1C</chem>                                                                              | C22H19BrF2N2O3  | 477.299 | PH-797804                     |
| Selleck   |       |                                                                                                                                                    |                 |         |                               |
| Chemicals | S4119 | <chem>c(cc(N1CCN(C)CC1)c(F)c2)(N(CC)C=C(C(=O)O)C3=O)c23.S(=O)(=O)(O)C.O.O</chem>                                                                   | C18H28FN3O8S    | 465.494 | Pefloxacin Mesylate Dihydrate |
| Selleck   |       |                                                                                                                                                    |                 |         |                               |
| Chemicals | S2738 | <chem>c1(ccccc1)CN2CCN(CC(=O)NN=Cc3c(O)c(CC=C)ccc3)CC2</chem>                                                                                      | C23H28N4O2      | 392.494 | PAC-1                         |
| Selleck   |       |                                                                                                                                                    |                 |         |                               |
| Chemicals | S7397 | <chem>c1(cc(NC(=O)Nc2ccc(OC3ccnc(C(NC)=O)c3)cc2)ccc1Cl)C(F)(F)F</chem>                                                                             | C21H16ClF3N4O3  | 464.825 | Sorafenib                     |
| Selleck   |       |                                                                                                                                                    |                 |         |                               |
| Chemicals | S2750 | <chem>C(NC1CCOCC1)(=O)c2ccc(c3nccc(c4c[nH]nc4c5ncccc5)c3)cc2</chem>                                                                                | C25H23N5O2      | 425.482 | GW788388                      |
| Selleck   |       |                                                                                                                                                    |                 |         |                               |
| Chemicals | S2319 | <chem>C1(=O)[C@H]2[C@@]3(O2)[C@@](C)(CC[C@@]4([H])[C@]3(C)C(=O)C[C@@]5([H])[C@@]4(COC(=O)C6)[C@@]6([H])OC5(C)C)[C@H](c7ccoc7)O1</chem>             | C26H30O8        | 470.512 | Limonin                       |
| Selleck   |       |                                                                                                                                                    |                 |         |                               |
| Chemicals | S2479 | <chem>[C@H]1(O)[C@]([H])([C@H](NC([C@H]2N(C)C[C@H](CCC)C2)=O)[C@H](O)C)O[C@H](SC)[C@H](O)[C@H]1O.Cl</chem>                                         | C18H35ClN2O6S   | 442.998 | Lincomycin HCl                |
| Selleck   |       |                                                                                                                                                    |                 |         |                               |
| Chemicals | S2335 | <chem>[C@@]1([H])([C@H]2O)[C@@](CO3)(CC4)[C@]5([C@@]23O)[C@H](O)[C@]4([H])C(=C)C5=O)[C@@H](O)CCC1(C)C</chem>                                       | C20H28O6        | 364.433 | Oridonin                      |
| Selleck   |       |                                                                                                                                                    |                 |         |                               |
| Chemicals | S2489 | <chem>C1C[C@@H](C(=O)N[C@@H](C(O)=O)Cc2ccccc2)CC[C@@H]1C(C)c(C(=O)C(c1ccc(O)cc1)=CO2)(ccc(O)c3O[C@H]4O[C@H](CO)[C@@H](O)[C@H](O)[C@H]4O)c23</chem> | C19H27NO3       | 317.423 | Nateglinide                   |
| Selleck   |       |                                                                                                                                                    |                 |         |                               |
| Chemicals | S2346 |                                                                                                                                                    | C21H20O10       | 432.377 | Puerarin                      |
| Selleck   |       |                                                                                                                                                    |                 |         |                               |
| Chemicals | S2500 | <chem>c1cc(CCC(=O)c2c(OC(CNCCC)O)cccc2)ccc1</chem>                                                                                                 | C21H27NO3       | 341.444 | Propafenone HCl               |
| Selleck   |       |                                                                                                                                                    |                 |         |                               |
| Chemicals | S2362 | <chem>c1cc(C(CNC)O)ccc1O</chem>                                                                                                                    | C9H13NO2        | 167.205 | Synephrine                    |

|           |       |                                                                   |                 |         |                           |
|-----------|-------|-------------------------------------------------------------------|-----------------|---------|---------------------------|
| Selleck   |       |                                                                   |                 |         |                           |
| Chemicals | S2512 | c1nc(NC(C2=C(O)c3c(ccs3)S(=O)(=O)N2C)=O)cc1                       | C13H11N3O4S2    | 337.374 | Tenoxicam                 |
| Selleck   |       | [C@@H]1(CO)[C@H](O)[C@H](O)[C@@H](O)[C@]([H])([C@]2([H])c3c(c     |                 |         |                           |
| Chemicals | S2375 | c(O)cc(CO)c3C(=O)c4c2ccc4O)O1                                     | C21H22O9        | 418.394 | Aloin                     |
| Selleck   |       |                                                                   |                 |         |                           |
| Chemicals | S2533 | c1cc([C@@](O)([H])[C@](C)([H])NCCc2ccc(O)cc2)ccc1O.Cl             | C17H22ClNO3     | 323.814 | Ritodrine HCl             |
| Selleck   |       |                                                                   |                 |         |                           |
| Chemicals | S2386 | c1cc2c(C(=C3C(=O)c4c(cccc4)N3)C(=O)N2)cc1                         | C16H10N2O2      | 262.263 | Indirubin                 |
| Selleck   |       | [Br-                                                              |                 |         |                           |
|           |       | ]O.[C@@]1([H])[C]C@H](OC(=O)C(O)(c2sccc2)c3sccc3)C4)[N+](C)(C     |                 |         | Tiotropium Bromide        |
| Chemicals | S2547 | [C@]4([H])[C@H]5[C@@H]1O5                                         | C19H24BrNO5S2   | 490.432 | hydrate                   |
| Selleck   |       |                                                                   |                 |         |                           |
| Chemicals | S2401 | c1(O)cc(CC(O)C([O-])=O)ccc1O.[Na+]                                | C9H9NaO5        | 220.155 | Sodium Danshensu          |
| Selleck   |       | C1C[C@@]2(C)C(CCC[C@]3([H])[C@@]2([H])C(=O)C[C@@]4(C)[C@@]3([     |                 |         |                           |
| Chemicals | S2559 | [H])CC[C@@]4(O)C(=O)COC(=O)C=CC1=O                                | C23H30O6        | 402.481 | Cortisone acetate         |
| Selleck   |       | [C@H]1(CO)O[C@@H](O[C@]23C[C@]([H])([C@]24COC(=O)c5ccccc5)[       |                 |         |                           |
| Chemicals | S2410 | C@](O)(O[C@H]46[H])C[C@]3(C)O6)[C@H](O)[C@@H](O)[C@@H]1O          | C23H28O11       | 480.462 | Paeoniflorin              |
| Selleck   |       |                                                                   |                 |         |                           |
| Chemicals | S2576 | c1c(C)c(CC2=NCCN2)c(C)cc1C(C)(C)C.Cl                              | C16H25ClN2      | 280.836 | Xylometazoline HCl        |
| Selleck   |       |                                                                   |                 |         |                           |
| Chemicals | S2438 | c1cc(C(O)CNC)ccc1O.Cl                                             | C9H14ClNO2      | 203.666 | Synephrine HCl            |
| Selleck   |       | C1(O)C(O)C(O)C(=O)CCCCCCCCCCCCC)C(SC)OC1C(NC(C2CC(CCC)            |                 |         |                           |
| Chemicals | S2596 | CN2C)=O)C(C)C.Cl                                                  | C34H64Cl2N2O6S  | 699.853 | Clindamycin palmitate HCl |
| Selleck   |       | c1cc2c(CC[C@]3([H])[C@@]2([H])CC[C@@]4(C)[C@@]3([H])C[C@@H](      |                 |         |                           |
| Chemicals | S2466 | O)[C@H]4O)cc1O                                                    | C18H24O3        | 288.381 | Estriol                   |
| Selleck   |       |                                                                   |                 |         |                           |
| Chemicals | S2607 | c1(OC)cc(OC)c(C(CCCN2CCCC2)=O)c(OC)c1.Cl                          | C17H26ClNO4     | 343.846 | Buflomedil HCl            |
| Selleck   |       | c1cc(S(=O)(=O)c2cc3c(ccc(C(N)=O)c3Nc4cccc(OC)c4)c(C)c2)cc(C(=O)N( |                 |         |                           |
| Chemicals | S2620 | C)C)c1                                                            | C27H26N4O5S     | 518.584 | GSK256066                 |
| Selleck   |       |                                                                   |                 |         |                           |
| Chemicals | S2767 | n1c(c2nc1)c(N)ncn2C                                               | C6H7N5          | 149.153 | 3-Methyladenine           |
| Selleck   |       | c1ccc(OCCCN(CC(c2ccccc2)c3ccccc3)Cc4c(Cl)c(C)(F)F)ccc4)cc1CC(O)   |                 |         |                           |
| Chemicals | S2630 | =O.Cl                                                             | C33H32Cl2F3NO3  | 618.513 | GW3965 HCl                |
| Selleck   |       |                                                                   |                 |         |                           |
| Chemicals | S2778 | c1(Nc2ccc(Cl)cc2Cl)nc(C(NCC3CCOCC3)=O)c(C(F)(F)F)n1               | C18H17Cl2F3N4O2 | 449.254 | GW842166X                 |
| Selleck   |       | c1c(C(=O)N)c(N[C@H]2CC[C@H](O)CC2)cc(n3c4c(C(=O)CC(C)(C)C4)c(C    |                 |         |                           |
| Chemicals | S2639 | (F)(F)F)n3)c1                                                     | C23H27F3N4O3    | 464.481 | SNX-2112 (PF-04928473)    |
| Selleck   |       |                                                                   |                 |         | Tofacitinib (CP-          |
| Chemicals | S2789 | n1c(N([C@@H]2[C@@H](C)CCN(C(Cc#N)=O)C2)C)c3c([nH]cc3)nc1          | C16H20N6O       | 312.37  | 690550,Tasocitinib)       |
| Selleck   |       |                                                                   |                 |         |                           |
| Chemicals | S2665 | c1cc(OC(C)(C)C(=O)O)ccc1C2CC2(Cl)Cl                               | C13H14Cl2O3     | 289.154 | Ciprofibrate              |
| Selleck   |       | c1(O)cc(CCc2[nH]nc(NC(c3ccc(N4C[C@@H](C)N[C@@H](C)C4)cc3)=O)      |                 |         |                           |
| Chemicals | S2801 | c2)cc(OC)c1                                                       | C26H33N5O3      | 463.572 | AZD4547                   |
| Selleck   |       |                                                                   |                 |         |                           |
| Chemicals | S2680 | c1nc2c(c3ccc(Oc4ccccc4)cc3)nn2[C@@H]5CCCN(C(=O)C=C)C5)c(N)n1      | C25H24N6O2      | 440.497 | Ibrutinib (PCI-32765)     |
| Selleck   |       | C1OCCN(CC(=O)N[C@@H](CCc2ccccc2)C(=O)N[C@@H](CC(C)C)C(=O)         |                 |         |                           |
| Chemicals | S2853 | N[C@@H](Cc3ccccc3)C(=O)N[C@@H](CC(C)C)C(=O)[C@@]4(C)CO4)C         | C40H57N5O7      | 719.91  | Carfilzomib (PR-171)      |
| Selleck   |       |                                                                   |                 |         |                           |
| Chemicals | S2690 | c1(F)ccc(C(=O)N2C[C@@H](c3onc(c4ccc(F)cc4)n3)CCC2)cc1             | C20H17F2N3O2    | 369.365 | ADX-47273                 |
| Selleck   |       |                                                                   |                 |         |                           |
| Chemicals | S3018 | c1(Nc2ccccc(F)(F)F)c2)ncccc1C(O)=O                                | C13H9F3N2O2     | 282.218 | Niflumic acid             |
| Selleck   |       | C1(OC)=C(C(=O)C2=CC1=O)C[C@H](C)C[C@@H](OC)[C@H](O)[C@H]          |                 |         |                           |
| Chemicals | S2713 | (C)C=C(C)[C@H](OC(N)=O)[C@@H](OC)C=CC=C(C)C(=O)N2                 | C29H40N2O9      | 560.636 | Geldanamycin              |
| Selleck   |       |                                                                   |                 |         |                           |
| Chemicals | S3032 | C(O)(=O)C(C)(OCc1c(c2h(Cc3ccccc3)n1)cccc2)C                       | C19H20N2O3      | 324.374 | Bindarit                  |
| Selleck   |       |                                                                   |                 |         | Dacomitinib (PF299804,    |
| Chemicals | S2727 | C(N1CCCC1)C=CC(=O)Nc2cc3c(ncnc3Nc4ccc(F)c(Cl)c4)cc2OC             | C24H25ClFN5O2   | 469.939 | PF299)                    |
| Selleck   |       |                                                                   |                 |         |                           |
| Chemicals | S4273 | C(N)(=O)c1cccc(N)c1                                               | C7H8N2O         | 136.151 | 3-Aminobenzamide          |
| Selleck   |       |                                                                   |                 |         |                           |
| Chemicals | S2742 | c1cc(c2cc3c(CCNc3=O)[nH]2)ccn1                                    | C12H11N3O       | 213.235 | PHA-767491                |
| Selleck   |       |                                                                   |                 |         |                           |
| Chemicals | S8049 | c1cc(Cn2c3c(cccc3)c4c2CCN(C)C4)ccc1C(=O)NO                        | C20H21N3O2      | 335.4   | Tubastatin A              |
| Selleck   |       |                                                                   |                 |         |                           |
| Chemicals | S2751 | c1(c2c3c(c(C(=O)N)C)nn3C)C(C)C1)cnc(Nc4ccc(N5CCN(C)CC5)cc4)n2     | C25H32N8O       | 460.575 | Milciclib (PHA-848125)    |
| Selleck   |       |                                                                   |                 |         |                           |
| Chemicals | S1333 | c1(C(F)(F)F)ccc(OC(c2ccccc2)CCNC)cc1.Cl                           | C17H19ClF3NO    | 345.787 | Fluoxetine HCl            |



|           |       |                                                                                                 |                            |         |                         |
|-----------|-------|-------------------------------------------------------------------------------------------------|----------------------------|---------|-------------------------|
| Selleck   |       |                                                                                                 |                            |         |                         |
| Chemicals | S3070 | <chem>N1(CC(N)=O)CCCC1=O</chem>                                                                 | <chem>C6H10N2O2</chem>     | 142.156 | Piracetam               |
| Selleck   |       |                                                                                                 |                            |         |                         |
| Chemicals | S4256 | <chem>c1nc(N2CCN(CCCC3C(=O)CC4(CCCC4)CC3=O)CC2)ncc1.Cl</chem>                                   | <chem>C21H32ClN5O2</chem>  | 421.964 | Buspirone HCl           |
| Selleck   |       |                                                                                                 |                            |         |                         |
| Chemicals | S1189 | <chem>N1=C(CN2CCO[C@H](O[C@H](c3cc(C(F)(F)F)cc(C(F)(F)F)c3)C)[C@@H]2c4ccc(F)cc4)NC(=O)N1</chem> | <chem>C23H21F7N4O3</chem>  | 534.427 | Aprepitant              |
| Selleck   |       |                                                                                                 |                            |         |                         |
| Chemicals | S1441 | <chem>C1C(O)(C(c2ccc(O)cc2)CN(C)C)CCCC1.Cl</chem>                                               | <chem>C17H28ClNO2</chem>   | 313.863 | Venlafaxine             |
| Selleck   |       |                                                                                                 |                            |         |                         |
| Chemicals | S2103 | <chem>c1cc2c([C@@]3[C@H]45)[C@@](O)(CCC4=O)[C@H](N(CC6CC6)CC3)C2)c(O5)c1O.Cl</chem>             | <chem>C20H24ClNO4</chem>   | 377.862 | Naltrexone HCl          |
| Selleck   |       |                                                                                                 |                            |         |                         |
| Chemicals | S3024 | <chem>n1c(c2ccc(Cl)c2Cl)c(N)nc(N)n1</chem>                                                      | <chem>C9H7Cl2N5</chem>     | 256.091 | Lamotrigine             |
| Selleck   |       |                                                                                                 |                            |         |                         |
| Chemicals | S1438 | <chem>[C@H](O(C(C)C)O1)(CO[C@]2(COS(=O)=O)N)[C@H]3OC(C)(C)O2][C@@H]13</chem>                    | <chem>C12H21NO8S</chem>    | 339.362 | Topiramate              |
| Selleck   |       |                                                                                                 |                            |         |                         |
| Chemicals | S3175 | <chem>C(NC)C[C@H](Oc1cccc1C)c2ccccc2.Cl</chem>                                                  | <chem>C17H22ClNO</chem>    | 291.816 | Atomoxetine HCl         |
| Selleck   |       |                                                                                                 |                            |         |                         |
| Chemicals | S4283 | <chem>c(cccc1)(C=Cc2c(cccc2)C3=CCCN(C)C)c13.Cl</chem>                                           | <chem>C20H22ClN</chem>     | 311.848 | Cyclobenzaprine HCl     |
| Selleck   |       |                                                                                                 |                            |         |                         |
| Chemicals | S1259 | <chem>c1cc2c([C@H](CCNC(=O)CC)CC2)c3c1OCC3</chem>                                               | <chem>C16H21NO2</chem>     | 259.343 | Ramelteon               |
| Selleck   |       |                                                                                                 |                            |         |                         |
| Chemicals | S1444 | <chem>c1c2c(snc2N3CCN(CCc4cc5c(NC(=O)C5)cc4Cl)CC3)ccc1.Cl</chem>                                | <chem>C21H22Cl2N4OS</chem> | 449.397 | Ziprasidone HCl         |
| Selleck   |       |                                                                                                 |                            |         |                         |
| Chemicals | S2452 | <chem>c1(C(C(NC(C)(C)C)C)=O)cc(Cl)ccc1.Cl</chem>                                                | <chem>C13H19Cl2NO</chem>   | 276.202 | Amfebutamone HCl        |
| Selleck   |       |                                                                                                 |                            |         |                         |
| Chemicals | S1445 | <chem>c1(c(CS(=O)=O)N)no2)c2cccc1</chem>                                                        | <chem>C8H8N2O3S</chem>     | 212.226 | Zonisamide              |
| Selleck   |       |                                                                                                 |                            |         |                         |
| Chemicals | S3180 | <chem>[nH]1c(c2c(C[C@H]3CCCN3C)c1)ccc(CCS(c4ccccc4)(=O)=O)c2.Br</chem>                          | <chem>C22H27BrN2O2S</chem> | 463.431 | Eletriptan HBr          |
| Selleck   |       |                                                                                                 |                            |         |                         |
| Chemicals | S4289 | <chem>c1(Cl)cc(C(=O)NCCN(CC)CC)c(OC)cc1N.Cl</chem>                                              | <chem>C14H23Cl2N3O2</chem> | 336.257 | Metoclopramide HCl      |
| Selleck   |       |                                                                                                 |                            |         |                         |
| Chemicals | S1280 | <chem>C1CCN(CC)C1CNC(=O)c2c(OC)cc(N)c(S(=O)=O)CC)c2</chem>                                      | <chem>C17H27N3O4S</chem>   | 369.479 | Amisulpride             |
| Selleck   |       |                                                                                                 |                            |         |                         |
| Chemicals | S1614 | <chem>c(sc(N)n1)(cc(OC(F)(F)F)cc2)c12</chem>                                                    | <chem>C8H5F3N2OS</chem>    | 234.198 | Riluzole                |
| Selleck   |       |                                                                                                 |                            |         |                         |
| Chemicals | S2459 | <chem>N1c2c(cc(Cl)cc2)N=C(N3CCN(C)CC3)c4c1cccc4</chem>                                          | <chem>C18H19ClN4</chem>    | 326.823 | Clozapine               |
| Selleck   |       |                                                                                                 |                            |         |                         |
| Chemicals | S1693 | <chem>N1(c2c(cccc2)C=Cc3c1cccc3)C(N)=O</chem>                                                   | <chem>C15H12N2O</chem>     | 236.269 | Carbamazepine           |
| Selleck   |       |                                                                                                 |                            |         |                         |
| Chemicals | S3189 | <chem>N1c(c2CC1=O)cccc2CCN(CCC)CCC.Cl</chem>                                                    | <chem>C16H25ClN2O</chem>   | 296.836 | Ropinirole HCl          |
| Selleck   |       |                                                                                                 |                            |         |                         |
| Chemicals | S1281 | <chem>c1(OC)ccc(C(=O)N2CCCC2=O)cc1</chem>                                                       | <chem>C12H13NO3</chem>     | 219.237 | Aniracetam              |
| Selleck   |       |                                                                                                 |                            |         |                         |
| Chemicals | S1615 | <chem>C(C)(N=C1N(CCCC1)C2=O)=C2CCN3CCC(c4noc5c4ccc(F)c5)CC3</chem>                              | <chem>C23H27FN4O2</chem>   | 410.484 | Risperidone             |
| Selleck   |       |                                                                                                 |                            |         |                         |
| Chemicals | S2460 | <chem>[C@H]1(NCCC)Cc2c(nc(N)s2)CC1</chem>                                                       | <chem>C10H17N3S</chem>     | 211.327 | Pramipexole             |
| Selleck   |       |                                                                                                 |                            |         |                         |
| Chemicals | S1747 | <chem>C(C)(NC(C)=C(C(=O)OCCOC)C1c2cc([N+](O-))=O)ccc2)=C1C(=O)OC(C)C</chem>                     | <chem>C21H26N2O7</chem>    | 418.44  | Nimodipine              |
| Selleck   |       |                                                                                                 |                            |         |                         |
| Chemicals | S3199 | <chem>c1ccc(O[C@@H]([C@@]2([H])CNCCO2)c3ccccc3)c(OC)c1.CS(=O)(O)=O</chem>                       | <chem>C20H27NO6S</chem>    | 409.496 | Reboxetine mesylate     |
| Selleck   |       |                                                                                                 |                            |         |                         |
| Chemicals | S1330 | <chem>c1c(C(COC(=O)N)COC(=O)N)cccc1</chem>                                                      | <chem>C11H14N2O4</chem>    | 238.24  | Felbamate               |
| Selleck   |       |                                                                                                 |                            |         |                         |
| Chemicals | S1920 | <chem>c1(F)ccc(C(CCCN2CCC(O)(c3ccc(Cl)cc3)CC2)=O)cc1</chem>                                     | <chem>C21H23ClFNO2</chem>  | 375.864 | Haloperidol             |
| Selleck   |       |                                                                                                 |                            |         |                         |
| Chemicals | S2493 | <chem>N1c2c(cccc2)N=C(N3CCN(C)CC3)c4c1sc(C)c4</chem>                                            | <chem>C17H20N4S</chem>     | 312.433 | Olanzapine              |
| Selleck   |       |                                                                                                 |                            |         |                         |
| Chemicals | S1898 | <chem>c1cc2c(N=CC2C(=O)OC3C[C@]([H])(N(C)[C@]4([H])C3)CC4)cc1.Cl</chem>                         | <chem>C17H21ClN2O2</chem>  | 320.814 | Tropisetron             |
| Selleck   |       |                                                                                                 |                            |         |                         |
| Chemicals | S3212 | <chem>C(NCCN1CCOCC1)(=O)c2ccc(Cl)cc2</chem>                                                     | <chem>C13H17ClN2O2</chem>  | 268.739 | Moclobemide (Ro 111163) |
| Selleck   |       |                                                                                                 |                            |         |                         |
| Chemicals | S1332 | <chem>c1cc2c(C(=O)N(C)Cc3n2cnc3C(OC)=O)cc1F</chem>                                              | <chem>C15H14FN3O3</chem>   | 303.288 | Flumazenil              |
| Selleck   |       |                                                                                                 |                            |         |                         |
| Chemicals | S1975 | <chem>c1cc2c(NC(=O)CC2)cc1OCCCCN3CCN(c4cccc(Cl)c4)CC3</chem>                                    | <chem>C23H27Cl2N3O2</chem> | 448.385 | Aripiprazole            |
| Selleck   |       |                                                                                                 |                            |         |                         |
| Chemicals | S2541 | <chem>C(CCN(C)C)N1c2c(cccc2)CCc3c1cc(Cl)cc3.Cl</chem>                                           | <chem>C19H24Cl2N2</chem>   | 351.313 | Clomipramine HCl        |
| Selleck   |       |                                                                                                 |                            |         |                         |
| Chemicals | S2456 | <chem>c1ccc2c(Sc3c(cc(Cl)cc3)N2CCCN(C)C)c1.Cl</chem>                                            | <chem>C17H20Cl2N2S</chem>  | 355.325 | Chlorpromazine HCl      |

|           |         |                                                                                                                                                                              |                 |         |                                                  |  |  |  |  |
|-----------|---------|------------------------------------------------------------------------------------------------------------------------------------------------------------------------------|-----------------|---------|--------------------------------------------------|--|--|--|--|
| Selleck   |         |                                                                                                                                                                              |                 |         |                                                  |  |  |  |  |
| Chemicals | S4058   | C1CN(CCC)[C@H](C(Nc2c(C)cccc2C)=O)CC1.Cl                                                                                                                                     | C17H27ClN2O     | 310.862 | Ropivacaine HCl                                  |  |  |  |  |
| Selleck   |         |                                                                                                                                                                              |                 |         |                                                  |  |  |  |  |
| Chemicals | S1356   | C1(=O)OCCCN1[C@@H](CC)C(=O)N                                                                                                                                                 | C8H14N2O2       | 170.209 | Levetiracetam                                    |  |  |  |  |
| Selleck   |         |                                                                                                                                                                              |                 |         |                                                  |  |  |  |  |
| Chemicals | S2016   | C1c2c(cccc2)C3N(CCN(C)C3)c4c1cccn4                                                                                                                                           | C17H19N3        | 265.353 | Mirtazapine                                      |  |  |  |  |
| Selleck   |         |                                                                                                                                                                              |                 |         |                                                  |  |  |  |  |
| Chemicals | S3005   | [C@@H]1(c2ccc(F)cc2)CCNC[C@H]1COc3ccc4c(OCO4)c3.Cl                                                                                                                           | C19H21ClFNO3    | 365.826 | Paroxetine HCl                                   |  |  |  |  |
| Selleck   |         |                                                                                                                                                                              |                 |         |                                                  |  |  |  |  |
| Chemicals | S2525   | C1(c2cccc2)(c3ccccc3)C(=O)NC(=O)N1                                                                                                                                           | C15H12N2O2      | 252.268 | Phenytoin                                        |  |  |  |  |
| Selleck   |         |                                                                                                                                                                              |                 |         |                                                  |  |  |  |  |
| Chemicals | S4202   | Cl.c1cc(OC)c(OC)cc1C(C(C)C)(C#N)CCCN(CCc2cc(OC)c(OC)cc2)C                                                                                                                    | C27H39ClN2O4    | 491.063 | Verapamil HCl                                    |  |  |  |  |
| Selleck   |         |                                                                                                                                                                              |                 |         |                                                  |  |  |  |  |
| Chemicals | S1391   | N1(C(=O)N)c2c(cccc2)CC(=O)c3c1cccc3                                                                                                                                          | C15H12N2O2      | 252.268 | Oxcarbazepine                                    |  |  |  |  |
| Selleck   |         |                                                                                                                                                                              |                 |         |                                                  |  |  |  |  |
| Chemicals | S2084   | c1cc2c(cccc2)c(O)[C@H](c3cccs3)CCNC)c1.Cl                                                                                                                                    | C18H20ClNOS     | 333.876 | Duloxetine HCl                                   |  |  |  |  |
| Selleck   |         |                                                                                                                                                                              |                 |         |                                                  |  |  |  |  |
| Chemicals | S3021   | n1(c2ccc(Cl)cc2Cl)c(c3ccc(Cl)cc3)c(C)c(C)(NN4CCCC4)=O)n1                                                                                                                     | C22H21Cl3N4O    | 463.787 | Rimonabant                                       |  |  |  |  |
| Axon      |         | COc1cccc(c1c1cc(nn1c1ccc(cc1C(C)C)C(=O)N(CCCN(C)C)C)C(=O)NC1(C(=O)O)C2CC3CC1CC(C2)C3)OC                                                                                      | C39H51N5O6      | 685.85  | SR 142948                                        |  |  |  |  |
| Medchem   | 1255    | ONC(=O)C[C@H](C(=O)N)[C@@H](C(C)(C)C)C(=O)N[C@@H](c1ccccc1)C)CCCc1ccc(c(c1)C)c1cccc1                                                                                         | C34H43N3O4      | 557.72  | UK 356618                                        |  |  |  |  |
| Axon      | 2111    |                                                                                                                                                                              |                 |         |                                                  |  |  |  |  |
| Medchem   |         |                                                                                                                                                                              |                 |         |                                                  |  |  |  |  |
| Cayman    |         |                                                                                                                                                                              |                 |         |                                                  |  |  |  |  |
| Chemical  | 10879   | O=C(Oc1ccccc1C(C)C)NCCc1ccc2c(c1)cccc2                                                                                                                                       | C22H23NO2       | 333.42  | JW 480                                           |  |  |  |  |
| Cayman    |         |                                                                                                                                                                              |                 |         |                                                  |  |  |  |  |
| Chemical  | 13942   | Nc1cccc(c1)Cn1ncc2c(c1=O)n(C)c1c2sc(c1)S(=O)C                                                                                                                                | C17H16N4O2S2    | 372.46  | ML-265                                           |  |  |  |  |
| Cayman    |         |                                                                                                                                                                              |                 |         |                                                  |  |  |  |  |
| Chemical  | 15016   | COc1ccc2c(c1)ccc(c2)OCC1(CN(C1)C(=O)c1ccc(cc1)F)C(=O)O                                                                                                                       | C23H20FNO5      | 409.41  | PF-04418948                                      |  |  |  |  |
| Cayman    |         | CCOC(=O)[C@H](CC(=O)N)[C@H](C(=O)N)[C@H](c1ccccc1)C(=O)OCC                                                                                                                   | C27H35N3O6S     | 529.65  | Ezatiostat                                       |  |  |  |  |
| Chemical  | 16248   | )CSCc1ccccc1)N                                                                                                                                                               |                 |         |                                                  |  |  |  |  |
| Cayman    |         |                                                                                                                                                                              |                 |         |                                                  |  |  |  |  |
| Chemical  | 17924   | O=C1CCC(=O)C1C(=O)c1ccc(cc1[N+](=O)[O-])C(F)(F)F                                                                                                                             | C14H10F3NO5     | 329.23  | Nitisinone                                       |  |  |  |  |
| Chem-     |         |                                                                                                                                                                              |                 |         |                                                  |  |  |  |  |
| Impex     | 22427   | O=C(C(=O)c1ccc(cc1)Cl)c1ccc(cc1)Cl                                                                                                                                           | C14H8Cl2O2      | 279.12  | 4,4'-Dichlorobenzil                              |  |  |  |  |
| Cayman    |         |                                                                                                                                                                              |                 |         |                                                  |  |  |  |  |
| Chemical  | 9001740 | CCCCCCCCCCCCC(=O)NCCO                                                                                                                                                        | C17H35NO2       | 285.47  | Ethanolamide                                     |  |  |  |  |
| Cayman    |         | CC[C@@H]1/C=C/C(=O)/C[C@H](C)C[C@H](OC)[C@H]2O[C@](O)([C@@H](C[C@@H]2O)C)C(=O)C(=O)N2[C@H](C(=O)O)[C@@H](C[C@@H](C[C@@H](C(=O)O)C)/C=C/[C@@H]1CC[C@H](C[C@@H](C1)OC)O)/C)CCC | C43H69NO12      | 792     | Ascomycin                                        |  |  |  |  |
| Axon      | 11309   | COc1cc(C(C)C)c2c(c1)S(=O)(=O)N(C2=O)COc1cc(=O)n2c(n1)c(OCCN1CCCC1)ccc2                                                                                                       | C27H32N4O7S     | 556.63  | SSR 69071                                        |  |  |  |  |
| Medchem   | 1269    |                                                                                                                                                                              |                 |         |                                                  |  |  |  |  |
| Axon      |         |                                                                                                                                                                              |                 |         |                                                  |  |  |  |  |
| Medchem   | 2118    | OC(=O)[C@H]1C[C@@H]1C(=O)c1ccc(c(c1)Cl)Cl                                                                                                                                    | C11H8Cl2O3      | 259.09  | UPF 648                                          |  |  |  |  |
| Cayman    |         | CO[C@@H]1[C@@H](CC[C@@H]2([C@H]1[C@@H]1(C)O[C@@H]1CC=C(C)C)CO2)OC(=O)/C=C/C=C/C=C/C(=O)O                                                                                     | C26H34O7        | 458.54  | Fumagillin                                       |  |  |  |  |
| Chemical  | 11332   | CCc1cc(C)[nH]c(=O)c1CNC(=O)c1cc(cc2c1cnn2C(C)C)c1ccnc(c1)N1CCN                                                                                                               | C31H39N7O2      | 541.69  | GSK343                                           |  |  |  |  |
| Cayman    | 14094   | (CC1)C                                                                                                                                                                       |                 |         |                                                  |  |  |  |  |
| Cayman    |         | CCOC(=O)N1[C@H](CC)C[C@@H](c2c1ccc(c2)C(F)(F)F)N(C(=O)OC)Cc1cc(cc(c1)C(F)(F)F)C(F)(F)F                                                                                       | C26H25F9N2O4    | 600.47  | Torcetrapib                                      |  |  |  |  |
| Chemical  | 15028   | COc1ccc(cc1)C[C@@H](C(=O)N)[C@H](C(=O)[C@@H]1(C)CO1)Cc1ccccc1)NC(=O)[C@@H](NC(=O)CN1CCOCC1)C                                                                                 | C31H40N4O7      | 580.67  | ONX 0914                                         |  |  |  |  |
| Cayman    |         |                                                                                                                                                                              |                 |         |                                                  |  |  |  |  |
| Chemical  | 17995   | CCCN1CCN(CC1)c1ccc(cc1)C(=O)NC1(CCCCC1)C(=O)NCC#N                                                                                                                            | C23H33N5O2      | 411.54  | Balicatib                                        |  |  |  |  |
| AstaTech  | 41123   | OC(=O)CNC(=O)[C@@H](Cc1ccccc1)CN1CC[C@@H]([C@H](C1)C)(C)c1ccc(c1)O                                                                                                           | C25H32N2O4      | 424.53  | alvimopan                                        |  |  |  |  |
| Cayman    |         |                                                                                                                                                                              |                 |         |                                                  |  |  |  |  |
| Chemical  | 9002002 | Clc1ccc2c(c1)cc(a2)C(=O)NNS(=O)(=O)c1ccccc1C(F)(F)F                                                                                                                          | C16H10ClF3N2O4S | 418.77  | BCATc Inhibitor 2                                |  |  |  |  |
| Axon      |         | O[C@@H]([C@@H]([C@@H](NC(=O)c1cc(cc(c1)N(S(=O)(=O)C)C)C(=O)N)[C@@H](c1ccccc1)C)Cc1ccccc1)CNC1CC1                                                                             | C31H38N4O5S     | 578.72  | BACE-1inhibitor                                  |  |  |  |  |
| Medchem   | 1125    |                                                                                                                                                                              |                 |         |                                                  |  |  |  |  |
| Axon      |         |                                                                                                                                                                              |                 |         |                                                  |  |  |  |  |
| Medchem   | 1383    | OC(=O)C(=O)c1cn(c2c1cc(cc2)c1ccc(cc1)OC(F)(F)F)Cc1ccccc1                                                                                                                     | C24H16F3NO4     | 439.38  | Tiplaxtinin                                      |  |  |  |  |
| CHES      |         |                                                                                                                                                                              |                 |         |                                                  |  |  |  |  |
| Fine      |         |                                                                                                                                                                              |                 |         |                                                  |  |  |  |  |
| Organic   | 2132    | Oc1ccc(cc1)c1ccc2c(c1=O)ccc(c2O)O                                                                                                                                            | C15H10O5        | 270.24  | 7,8-Dihydroxy-3-(4-hydroxy-phenyl)-chromen-4-one |  |  |  |  |
| Cayman    |         |                                                                                                                                                                              |                 |         |                                                  |  |  |  |  |
| Chemical  | 11931   | O=C(OC(C)(C)C)CN(Cc1ccc(s1)[N+](=O)[O-])Cc1ccc(cc1)Cl                                                                                                                        | C18H21ClN2O4S   | 396.89  | GSK4112?                                         |  |  |  |  |
| Cayman    |         |                                                                                                                                                                              |                 |         |                                                  |  |  |  |  |
| Chemical  | 14406   | CCN(c1nc(N)c(nc1Cl)C(=O)NC(=N)N)C(C)C                                                                                                                                        | C11H18ClN7O     | 299.76  | Amiloride                                        |  |  |  |  |

|          |          |                                                                                                                  |                 |         |                      |  |
|----------|----------|------------------------------------------------------------------------------------------------------------------|-----------------|---------|----------------------|--|
| Cayman   |          | O[C@H]1C[C@@H](C[C@H]1COS(=O)(=O)N)n1ccc2c1nnc2N[C@H]1C                                                          |                 |         |                      |  |
| Chemical | 15217    | Cc2c1cccc2                                                                                                       | C21H25N5O4S     | 443.52  | MLN4924              |  |
| Cayman   |          |                                                                                                                  |                 |         |                      |  |
| Chemical | 16480    | CCN1CCN(CC1)c1nc2CCCCCc2c(c1)c1ccc(cc1)F                                                                         | C23H30FN3       | 367.5   | Blonanserin          |  |
| Cayman   |          |                                                                                                                  |                 |         |                      |  |
| Chemical | 17999    | CCN(c1ccc(cc1)/C=N/NC(=O)c1ccc(cc1)O)CC                                                                          | C18H21N3O2      | 311.38  | DY 131               |  |
| AstaTech | 41281    | BrC1csc(c1)COc1nc(N)nc2c1nc[nH]2                                                                                 | C10H8BrN5OS     | 326.17  | LOMEGUATRIB          |  |
| Cayman   |          | CCOC(=O)/C=C/[C@@H](NC(=O)[C@@H](NC(=O)[C@H](C(C)C)NC(=O)                                                        |                 |         |                      |  |
| Chemical | 10007713 | )c1cccc(c1C)O)CO)CC(C)C                                                                                          | C26H39N3O7      | 505.6   | HMB-Val-Ser-Leu-VE   |  |
| Key      |          | O[C@@H](C(=O)N[C@H](C(=O)N[C@@H](C(=O)N[C@H](C(=O)N[C@H](C(=O)N1CCC[C@H]1C(=O)N[C@@H](C(=O)N)C)CCCNC(=N)N)CC(C)  |                 |         |                      |  |
| Organics | HS-2008  | C)CCCNC(=O)N)Cc1ccc(cc1)O)NC(=O)[C@@H](Cc1ccnc1)NC(=O)[C@@H](Cc1ccc(cc1)C)NC(=O)[C@@H](Cc1ccc2c(c1)cccc2)NC(=O)C | C70H92ClN17O14  | 1431.04 | Cetrotrelax          |  |
| Axon     |          | CCOC(=O)N[C@@H]1CC[C@@H]2[C@@H](C1)C[C@@H]1[C@H]([C@H]2/C=C/C/c2ccc(cn2)c2ccc(c2)F)[C@H](OC1=O)C                 |                 |         |                      |  |
| Medchem  | 1755     |                                                                                                                  | C29H33FN2O4     | 492.58  | SCH 530348           |  |
| Axon     |          |                                                                                                                  |                 |         |                      |  |
| Medchem  | 2148     | C[C@@H]1CN(C[C@H]1c1[nH]c(=O)c2c(n1)n(nc2)C1CCOCC1)Cc1ncccn1                                                     | C20H25N7O2      | 395.46  | PF 04447943          |  |
| Cayman   |          |                                                                                                                  |                 |         |                      |  |
| Chemical | 12018    | Clc1cc(COC(=O)N2CCN(CC2)CCC(=O)c2ccc3c(c2)oc(=O)[nH]3)cc(c1)Cl                                                   | C22H21Cl2N3O5   | 478.33  | PF-8380              |  |
| Cayman   |          |                                                                                                                  |                 |         | N-(p-amylicinnamoyl) |  |
| Chemical | 14531    | CCCCCc1ccc(cc1)/C=C/C(=O)Nc1ccccc1C(=O)O                                                                         | C21H23NO3       | 337.41  | Anthranilic Acid     |  |
| Cayman   |          |                                                                                                                  |                 |         |                      |  |
| Chemical | 15362    | OC(=O)/C(=N/Nc1sc(c(n1)c1ccc(c(c1)Cl)Cl)/Cc1ccccc1[N+])(=O)[O-]                                                  | C18H12Cl2N4O4S  | 451.28  | 4EGI-1               |  |
| Acros    |          |                                                                                                                  |                 |         |                      |  |
| Organics |          |                                                                                                                  |                 |         |                      |  |
| (US)     | 17397    | CCCCCCCCCCC(=O)O                                                                                                 | C11H22O2        | 186.29  | Undecanoic acid, 99% |  |
| Cayman   |          |                                                                                                                  |                 |         |                      |  |
| Chemical | 18002    | Oc1cc2c3SCCNC(=O)c3sc2cc1                                                                                        | C11H9NO2S2      | 251.32  | kb NB 142-70         |  |
| AstaTech | 42077    | C[C@H](Nc1ncnc2c1sc2C)CN1CCN(CC1)S(=O)(=O)c1ccc(c(c1)Cl)Cl                                                       | C20H23Cl2N5O2S2 | 500.46  | LPA2 ANTAGONIST 1    |  |
| Cayman   |          |                                                                                                                  |                 |         |                      |  |
| Chemical | 10008671 | CCCc1nn(c2c1[nH]c(nc2=O)c1cc(ccc1OCC)S(=O)(=O)N1CCN(CC1)C)C                                                      | C22H30N6O4S     | 474.58  | Sildenafil           |  |
| Axon     |          |                                                                                                                  |                 |         |                      |  |
| Medchem  | 2097     | COc1cccc(c1)c1cn(c2c1c(N)ncn2)c1ccc(cc1)CCN1CCC(CC1)O                                                            | C26H29N5O2      | 443.54  | CGP77675             |  |
| Axon     |          |                                                                                                                  |                 |         |                      |  |
| Medchem  | 1792     | Clc1cccc(c1)OCc1nn(c2c1c(N)ncn2)C1CCOCC1                                                                         | C17H18ClN5O2    | 359.81  | PF 4800567           |  |
| Axon     |          |                                                                                                                  |                 |         |                      |  |
| Medchem  | 2270     | BrC1cccc(c1)NC(=O)c1cccc(c1)S(=O)(=O)N1CCCCC1                                                                    | C19H21BrN2O3S   | 437.35  | AK 7                 |  |
| Cayman   |          |                                                                                                                  |                 |         |                      |  |
| Chemical | 12046    | COC(=O)c1cnn(c1/C=N/NC(=S)NC(C)(C)C)c1ccc(cc1F)F                                                                 | C17H19F2N5O2S   | 395.43  | CID-2745687          |  |
| Cayman   |          |                                                                                                                  |                 |         |                      |  |
| Chemical | 14603    | Fc1nccc(c1)c1ccc(c(c1)C(=O)Nc1ccnc1)OCc1ccccc1                                                                   | C24H18FN3O2     | 399.42  | GSK2578215           |  |
| Cayman   |          | CCCS1c1n([C@@H]2[C@H]2c2ccc(c(c2)F)F)c2c(n1)n(n2)[C@@H]1C[C@@H]([C@H]([C@H]1O)O)OCCO                             |                 |         |                      |  |
| Chemical | 15425    |                                                                                                                  | C23H28F2N6O4S   | 522.57  | Ticagrelor           |  |
| Cayman   |          |                                                                                                                  |                 |         |                      |  |
| Chemical | 17501    | CCCCCCC(=O)c1c(O)cc(cc1CC(=O)OCC)O                                                                               | C18H26O5        | 322.4   | Cytosporone B        |  |
| Cayman   |          |                                                                                                                  |                 |         |                      |  |
| Chemical | 18377    | COc1cccc(c1)c1ccc(c(c1)F)NC(=O)C1=C(CCC1)C(=O)O                                                                  | C20H18FNO4      | 355.36  | Vidofludimus         |  |
| AstaTech | 55318    | OCCN(CCCOc1ccc2c(c1)ncnc2Nc1n[nH]c(c1)CC(=O)Nc1cccc(c1)F)CC                                                      | C26H30FN7O3     | 507.56  | AZD1152-HQPA         |  |
| Cayman   |          |                                                                                                                  |                 |         |                      |  |
| Chemical | 10010206 | CCc1c(c2ccccc2)c(nn1c1cccc1c1cccc(c1)OCC(=O)O)c1ccccc1                                                           | C31H26N2O3      | 474.55  | BMS309403            |  |
| Axon     |          |                                                                                                                  |                 |         |                      |  |
| Medchem  | 1279     | O=C/C=C/C/c1ccnc1)NCCCC1CCN(CC1)C(=O)c1ccccc1                                                                    | C24H29N3O2      | 391.5   | FK866                |  |
| Axon     |          |                                                                                                                  |                 |         |                      |  |
| Medchem  | 1907     | Clc1cc2nc(c(nc2cc1Cl)NC(C)(C)C)S(=O)(=O)C                                                                        | C13H15Cl2N3O2S  | 348.25  | GLP-1R agonist DMB   |  |
| Axon     |          | N#C/C(=Clc1ccc(c(c1)OC)OCc1ccc(cc1C(F)(F)F)C(F)(F)F)/C(=O)Nc1nnc(s1)C(F)(F)F                                     |                 |         |                      |  |
| Medchem  | 2337     |                                                                                                                  | C23H13F9N4O3S   | 596.42  | XCT 790              |  |
| Cayman   |          |                                                                                                                  |                 |         |                      |  |
| Chemical | 12072    | FC(C(C(F)(F)F)c1ccc(cc1)NS(=O)(=O)c1cccs1)O)(F)F                                                                 | C13H9F6NO3S2    | 405.34  | SR 3335              |  |
| Cayman   |          |                                                                                                                  |                 |         |                      |  |
| Chemical | 14745    | CCCCCCCn1cc(c2c1ccc(c2)c1cccc(c1)C)CC(=O)N                                                                       | C25H32N2O       | 376.53  | Cysmethynil          |  |
| Cayman   |          |                                                                                                                  |                 |         |                      |  |
| Chemical | 15487    | Clc1ccc(c(c1)/C(=N/NC(=O)c1cccc(c1)S(=O)(=O)N1CCOCC1)/C)O                                                        | C19H20ClN3O5S   | 437.9   | SP2509               |  |
| Cayman   |          | Fc1ccc(cn1)NC(=O)[C@@]1(C)CCCN1c1nc(Nc2n[nH]c(c2)C2CC2)c2n(n1)ccc2                                               |                 |         |                      |  |
| Chemical | 17505    |                                                                                                                  | C23H24FN9O      | 461.49  | BMS 754807           |  |
| Cayman   |          |                                                                                                                  |                 |         |                      |  |
| Chemical | 18503    | NC(=O)Nc1cc(Cl)ccc1OCC(=O)N1CCN(C[C@H]1C)Cc1ccc(cc1)F                                                            | C21H24ClFN4O3   | 434.89  | BX 471               |  |

|                             |          |                                                                                                |               |         |                                                                                                               |
|-----------------------------|----------|------------------------------------------------------------------------------------------------|---------------|---------|---------------------------------------------------------------------------------------------------------------|
| AstaTech Cayman Chemical    | 70704    | CCCC[C@@]1(O)CC[C@H]2[C@H](O1)CC(=O)[C@@H]2CCCCCCC(=O)O)(F)F                                   | C20H32F2O5    | 390.46  | LUBIPROSTONE                                                                                                  |
| AstaTech Cayman Chemical    | 10010740 | O=C1CC(=NN1c1cccc1)c1ccc(cc1)[N+](=O)[O-]                                                      | C15H11N3O3    | 281.27  | CAY10550                                                                                                      |
| Axon                        | 16257    | Oc1ccc(cc1)C[C@H]1C(=O)N(C[C@H]2N1C(=O)CCN2C(=O)NCc1cccc1)Cc1cccc2c1cccc2                      | C33H32N4O4    | 548.6   | ICG-001                                                                                                       |
| Medchem Advanced ChemBlocks | 1985     | CN[C@H](C(=O)N[C@H]1CN(CC[C@@H]2N(C1=O)[C@@H](CC2)C(=O)NC(c1cccc1)c1cccc1)C(=O)CC(C)C          | C32H43N5O4    | 561.71  | AT 406                                                                                                        |
| Cayman                      | 10259    | OC(=O)c1ccc(nc1)C#Cc1ccc2c(c1)C(C)(C)CCS2                                                      | C19H17NO2S    | 323.41  | AGN 190299                                                                                                    |
| Acros Organics (US)         | 13217    | N#Cc1cccc(c1c1[nH]c2c(n1)c1ccc(cc1c1c2cccc1)Cl)C#N                                             | C23H11ClN4    | 378.81  | MF63                                                                                                          |
| Cayman Chemical             | 14772    | Clc1ccc(c(c1)Cl)O                                                                              | C6H4Cl2O      | 163     | 2,4-Dichlorophenol, 99%                                                                                       |
| Cayman Chemical             | 16207    | C/C=C(\C(=O)O[C@H]1C(=C[C@]23[C@]1(O)[C@H](O)C(=C[C@H](C3=O)[C@H]1[C@@H](C[C@H]2C)C1(C)CO)C)/C | C25H34O6      | 430.53  | Ingenol-3-angelate                                                                                            |
| Cayman Chemical             | 17703    | CCCCNc1ncc(c(n1)N[C@@H]1CC[C@H](CC1)O)c1ccc(cn1)CN1CCOCC1                                      | C24H36N6O2    | 440.58  | UNC2250                                                                                                       |
| Chem-Impex                  | 21985    | O=c1c(O)c(oc2c1cccc2)c1cccc1                                                                   | C15H10O3      | 238.24  | 3-Hydroxyflavone                                                                                              |
| AstaTech Cayman Chemical    | 78259    | Fc1cccc(c1)c1ccc(cn1)C(=O)NC1CCN(CC1)CC(F)(F)F                                                 | C19H19F4N3O   | 381.37  | HPGDS-INHIBITOR-1                                                                                             |
| Cayman Chemical             | 10016    | O=C[C@@H](NC(=O)[C@@H](NC(=O)[C@H](C)C)NC(=O)[C@H](Cc1ccc(cc1)O)NC(=O)C)CC(=O)O                | C23H32N4O8    | 492.5   | Ac-YVAD-CHO                                                                                                   |
| Cayman Chemical             | 15215    | COc1ccc2c(c1)[nH]c1c2C[C@@H]2N([C@H]1CC(C)C)C(=O)[C@@H](NC2=O)CCC(=O)OC(C)(C)C                 | C26H35N3O5    | 469.6   | ko143                                                                                                         |
| Axon Medchem                | 1992     | NC(=O)c1cnc(nc1NCc1cccc1)NCCc1ccc(c(c1)Cl)O                                                    | C20H20ClN5O2  | 397.86  | AS 1517499                                                                                                    |
| Advanced ChemBlocks         | 10265    | O=C(N1CCC[C@@](C1)(Cc1cccc1)C(=O)N(N(C)C)[C@H](NC(=O)C(N)(C)C)Cc1c[nH]c2c1cccc2                | C31H42N6O3    | 546.7   | Anamorelin                                                                                                    |
| Cayman Chemical             | 13243    | BrC1ccc(c(c1)/C=N/NC(=O)C)Sc1nc2c([nH]1)cccc2)C)O                                              | C17H15BrN4O2S | 419.3   | KH7                                                                                                           |
| Cayman Chemical             | 14806    | CCOCc1nc2c(n1CC(O)(C)C)c1cccc1nc2N                                                             | C17H22N4O2    | 314.38  | R-848                                                                                                         |
| Cayman Chemical             | 16239    | COc1ccc(cc1NS(=O)(=O)c1cc(C)cc(c1O)Cl)c1cccc1                                                  | C19H15Cl2NO4S | 424.3   | BMS 303141                                                                                                    |
| Cayman Chemical             | 17737    | CNC(=O)c1ccc(cc1)Nc1ncc(c(n1)NCc1nccnc1N(S(=O)(=O)C)C(F)F)                                     | C20H21F3N8O3S | 510.49  | Defactinib                                                                                                    |
| Chem-Impex                  | 22028    | O=c1cc(oc2c1ccc1c2cccc1)c1cccc1                                                                | C19H12O2      | 272.3   | a-Naphthoflavone                                                                                              |
| ChemBridge                  | 4403033  | OC(=O)CCn1nnc2c1cccc2                                                                          | C9H9N3O2      | 191.19  | 3-(1H-1,2,3-benzotriazol-1-yl)propanoic acid                                                                  |
| Cayman Chemical             | 17642    | CC(OC(=O)N1CCC(CC1)Oc1nccnc1c1cnn2c1ccc(cc1F)S(=O)(=O)C)C                                      | C21H24FN5O5S  | 477.5   | APD668                                                                                                        |
| Selleck Chemicals           | S7488    | Cc1cc(ccc1Nc1nc(NC2CCCC2)c2c(n1)[nH]cn2)N1CCOCC1                                               | C22H29N7O     | 407.91  | MPI-0479605-HCL                                                                                               |
| Tocris                      | 3411     | CC1(C)CCC(C)(C)C2=CC(=CC=C12)C3(OCCO3)C4=CC(=C(C=C4)C(O)=O                                     | C24H28O4      | 380.477 | SR 11237; SR-11237<br>FR 180204; 5-(2-PHENYLPYRAZOLO[1,5-A]PYRIDIN-3-YL)-1H-PYRAZOLO[3,4-C]PYRIDAZIN-3-AMINE; |
| Tocris                      | 3706     | NC1=N[NH]C2=C1C=C(N=N2)C3=C4C=CC=C[N]4N=C3C5=CC=CC=C5                                          | C18H13N7      | 327.343 | FR-180204                                                                                                     |
| Tocris                      | 4088     | CC1=CC(=C(C)[N]1C2=CC=C(F)C=C2)C(=O)CN3CCCC3                                                   | C18H21FN2O    | 300.371 | IU1; IU-1                                                                                                     |

|                   |          |                                                                    |                 |         |                                                                                                                                                                                                                                         |                                                                                                                                                                                                                                                                                                                                                                                                                                                                                                                                                                                                                                                                                                                                                                                                                                                                                                                                   |
|-------------------|----------|--------------------------------------------------------------------|-----------------|---------|-----------------------------------------------------------------------------------------------------------------------------------------------------------------------------------------------------------------------------------------|-----------------------------------------------------------------------------------------------------------------------------------------------------------------------------------------------------------------------------------------------------------------------------------------------------------------------------------------------------------------------------------------------------------------------------------------------------------------------------------------------------------------------------------------------------------------------------------------------------------------------------------------------------------------------------------------------------------------------------------------------------------------------------------------------------------------------------------------------------------------------------------------------------------------------------------|
|                   |          |                                                                    |                 |         |                                                                                                                                                                                                                                         | olanzapine ODT; Zyprexa<br>15mg; Lanzapin;<br>Zyprexa; LY-170053; Ran-<br>olanzapine Ir; Zyprexa -<br>7.5mg; Deprex; Lapozan;<br>Olanzapine-odt; Zyprexa<br>Velotab; Zyprexa - 10mg;<br>Ipg-olanzapine ODT;<br>Olanzapine and<br>Fluoxetine; Act<br>Olanzapine ODT; Apisco;<br>Sandoz Olanzapine ODT;<br>Act Olanzapine;<br>Egolanza; Mar-olanzapine<br>ODT; Teva-olanzapine;<br>Van-olanzapine; CO<br>Olanzapine; Jolyon-MD;<br>Zyprexa Zydys; Ran-<br>olanzapine ODT; Apo-<br>olanzapine ODT; Nu-<br>olanzapine; Caprilon;<br>Olanzapine; Ipg-<br>olanzapine; Olansek; 2-<br>methyl-4-(4-methyl-1-<br>piperaziny)-10H-<br>thieno[2,3-<br>b][1,5]benzodiazepine;<br>Jamp Olanzapine Fc;<br>C07322; Olanzapinum;<br>Accel-olanzapine; Ran-<br>olanzapine; Abbott-<br>olanzapine ODT; Elynza;<br>PMS-olanzapine; Mar-<br>olanzapine;<br>OLANZAPINE; Zyprexa<br>Intramuscular; Sandoz<br>Olanzapine; PMS-<br>olanzapine ODT; Mylan- |
| Tocris            | 4349     | CN1CCN(CC1)C2=NC3=CC=CC=C3NC4=C2C=C(C)S4                           | C17H20N4S       | 312.432 |                                                                                                                                                                                                                                         |                                                                                                                                                                                                                                                                                                                                                                                                                                                                                                                                                                                                                                                                                                                                                                                                                                                                                                                                   |
| Tocris            | 3676     | CC(F)(F)CN1CCOC2=C([N](N=C2C1=O)C3=CC=CC=C3Cl)C4=CC=C(C)C<br>=C4   | C21H17Cl2F2N3O2 | 452.281 | PF-514273                                                                                                                                                                                                                               |                                                                                                                                                                                                                                                                                                                                                                                                                                                                                                                                                                                                                                                                                                                                                                                                                                                                                                                                   |
| J & W<br>PharmLab |          |                                                                    |                 |         | (S)-2-(2-Methylpyrrolidin-2-<br>yl)-1H-benzimidazole-4-<br>carboxamide                                                                                                                                                                  |                                                                                                                                                                                                                                                                                                                                                                                                                                                                                                                                                                                                                                                                                                                                                                                                                                                                                                                                   |
| LLC               | 75R0522S | NC(=O)c1cccc2c1nc([nH]2)[C@]1(C)CCCN1                              | C13H16N4O       | 317.21  |                                                                                                                                                                                                                                         |                                                                                                                                                                                                                                                                                                                                                                                                                                                                                                                                                                                                                                                                                                                                                                                                                                                                                                                                   |
| Cayman            |          |                                                                    |                 |         |                                                                                                                                                                                                                                         |                                                                                                                                                                                                                                                                                                                                                                                                                                                                                                                                                                                                                                                                                                                                                                                                                                                                                                                                   |
| Chemical          | 18010    | Cc1cnc(nc1NCc1ccc(cc1)n1ncc1)c1cccc1C(C)C                          | C23H24N6        | 384.48  | ML-323                                                                                                                                                                                                                                  |                                                                                                                                                                                                                                                                                                                                                                                                                                                                                                                                                                                                                                                                                                                                                                                                                                                                                                                                   |
| Cayman            |          |                                                                    |                 |         |                                                                                                                                                                                                                                         |                                                                                                                                                                                                                                                                                                                                                                                                                                                                                                                                                                                                                                                                                                                                                                                                                                                                                                                                   |
| Chemical          | 17034    | OC[C@H]1CCCN1Cc1ccc(cc1)COc1cc(C)cc(c1)CS(=O)(=O)c1cccc1           | C27H31NO4S      | 465.6   | PF-543                                                                                                                                                                                                                                  |                                                                                                                                                                                                                                                                                                                                                                                                                                                                                                                                                                                                                                                                                                                                                                                                                                                                                                                                   |
| Medchem           |          |                                                                    |                 |         |                                                                                                                                                                                                                                         |                                                                                                                                                                                                                                                                                                                                                                                                                                                                                                                                                                                                                                                                                                                                                                                                                                                                                                                                   |
| Express           | HY-15846 | NC(=O)C[C@]1([H])N=C(c2ccc(cc2)Cl)c2c(n3c1nnc3C)sc(c2C)C           | C19H18ClN5OS    | 399.9   | CPI-203                                                                                                                                                                                                                                 |                                                                                                                                                                                                                                                                                                                                                                                                                                                                                                                                                                                                                                                                                                                                                                                                                                                                                                                                   |
| Medchem           |          | CN(CC(=O)N)[C@]1([H])(NC(=O)c1ccc(c(c1)Cl)OC(C)C)Cc1ccc(cc1)c1nc2n |                 |         |                                                                                                                                                                                                                                         |                                                                                                                                                                                                                                                                                                                                                                                                                                                                                                                                                                                                                                                                                                                                                                                                                                                                                                                                   |
| Express           | HY-10299 | (c1)cccc2[C@]1([H])(O)C)C                                          | C32H38ClN5O4    | 592.13  | GSK-923295                                                                                                                                                                                                                              |                                                                                                                                                                                                                                                                                                                                                                                                                                                                                                                                                                                                                                                                                                                                                                                                                                                                                                                                   |
|                   |          |                                                                    |                 |         | AM 80; Tamibaro;<br>Tamibarotene; OMS-<br>0728; tamibarotene; TM-<br>411; TOS-80; TOS-80T;<br>TAMIBAROTENE;<br>retinobenzoic acid;<br>Amnoid; Amnoleuk;<br>INNO-507; NSC-608000;<br>D01418; Amnolake; Am<br>80; AM-80; Z-208;<br>C12864 |                                                                                                                                                                                                                                                                                                                                                                                                                                                                                                                                                                                                                                                                                                                                                                                                                                                                                                                                   |
| Tocris            | 3507     | CC1(C)CCC(C)(C)C2=C1C=CC(=C2)NC(=O)C3=CC=C(C=C3)C(O)=O             | C22H25NO3       | 351.439 |                                                                                                                                                                                                                                         |                                                                                                                                                                                                                                                                                                                                                                                                                                                                                                                                                                                                                                                                                                                                                                                                                                                                                                                                   |

|                               |          |                                                                                  |                |         |                                                                                                                                                                                                                                                                                                                                 |                                                                                                                                                                                           |
|-------------------------------|----------|----------------------------------------------------------------------------------|----------------|---------|---------------------------------------------------------------------------------------------------------------------------------------------------------------------------------------------------------------------------------------------------------------------------------------------------------------------------------|-------------------------------------------------------------------------------------------------------------------------------------------------------------------------------------------|
|                               |          |                                                                                  |                |         |                                                                                                                                                                                                                                                                                                                                 | BF 2649 hydrochloride;<br>pitolisant;<br>TIPROLISANT;<br>Pitolisant hydrochloride;<br>Tiprolisant; Pitolisant;<br>pitolisantum; BF-2649;<br>Tiprolisant hydrochloride;<br>FUB-649; Wakix; |
| Tocris                        | 3743     | <chem>ClC1=CC=C(C(CCCOCCCN2CCCCC2)C=C1</chem>                                    | C17H26ClNO     | 295.847 | BF 2.649                                                                                                                                                                                                                                                                                                                        |                                                                                                                                                                                           |
| Tocris                        | 4100     | <chem>CC1=C(C=C(C([N]1CCCN2CCOCC2)C3=CC=CC=C3)C(=O)NC4=CC=CC(=C4)C(F)(F)F</chem> | C26H28F3N3O2   | 471.515 | HC 067047; HC-067047<br>Bicifadine hydrochloride;<br>Bicifadine; CL-220075;<br>BICIFADINE<br>HYDROCHLORIDE;<br>BICIFADINE; DOV-<br>220075; NIH-9542;<br>D03110; Bicifadine HCl;                                                                                                                                                 |                                                                                                                                                                                           |
| Tocris                        | 4357     | <chem>CC1=CC=C(C=C1)C23CNCC2C3</chem>                                            | C12H15N        | 173.254 | MCV-4147<br>Tacrine; Cognex;<br>C01453; 1,2,3,4-<br>tetrahydroacridin-9-amine;<br>TACRINE<br>HYDROCHLORIDE;<br>Tetrahydroaminoacridine;<br>Tacrine hydrochloride;<br>Tacrine HCl; Cl-970;<br>THA; tacrina; THA.HCl;<br>Tacrin hydrochloride;<br>Tacrinum; Talem;<br>TACRINE;<br>Tetrahydroaminacrine;<br>OROS-tacrine; tacrine; |                                                                                                                                                                                           |
| Tocris                        | 965      | <chem>NC1=C2CCCCC2=NC3=CC=CC=C13</chem>                                          | C13H14N2       | 198.264 | Tacrin<br>4-(5-(3-<br>Hydroxyphenyl)thiophen-2-<br>yl)-2-methylphenol                                                                                                                                                                                                                                                           |                                                                                                                                                                                           |
| Bide<br>Pharmatec<br>h        | BD289516 | <chem>Oc1cccc(c1)c1ccc(s1)c1ccc(c(c1)C)O</chem>                                  | C17H14O2S      | 282.36  |                                                                                                                                                                                                                                                                                                                                 |                                                                                                                                                                                           |
| Cayman<br>Chemical            | 19186    | <chem>CN(C[C@H](c1cccc1)NC(=O)N1Cc2c(C1(C)C)[nH]nc2Nc1nc(C)nc2c1scc2)</chem>     | C25H30N8OS     | 490.62  | PF-3758309                                                                                                                                                                                                                                                                                                                      |                                                                                                                                                                                           |
| Cayman<br>Chemical<br>Medchem | 19932    | <chem>OC[C@H](c1cccc(c1)Cl)NC(=O)c1[nH]cc(c1)c1nc(ncc1C)Nc1ccc(cc1Cl)F</chem>    | C24H20Cl2FN5O2 | 500.35  | TCS ERK 11e                                                                                                                                                                                                                                                                                                                     |                                                                                                                                                                                           |
| Express                       | HY-18072 | <chem>O=C(N1CCc2c1ccc(c2)c1cn(c2c1c(N)ncn2)C)Cc1cccc(c1)C(F)(F)F</chem>          | C24H20F3N5O    | 451.44  | GSK2606414                                                                                                                                                                                                                                                                                                                      |                                                                                                                                                                                           |
| AbovChem                      | HY-18630 | <chem>C=CCN(CCCCCCOc1ccc(c(c1)F)C(=O)c1ccc(cc1)Br)C</chem>                       | C23H27BrFNO2   | 448.37  | Ro 48-8071<br>KU 55933; KU-55933; KU-<br>0064<br>XAV 939; XAV939; NVP-<br>XAV-939; XAV-939                                                                                                                                                                                                                                      |                                                                                                                                                                                           |
| Tocris                        | 3544     | <chem>O=C1C=C(C(O(C=C1)C3=C2SC4=C(SC2=CC=C3)C=CC=C4)N5CCOCC5</chem>              | C21H17NO3S2    | 395.495 |                                                                                                                                                                                                                                                                                                                                 |                                                                                                                                                                                           |
| Tocris                        | 3748     | <chem>OC1=C2CSCCC2=NC(=N1)C3=CC=C(C(C=C3)C(F)(F)F</chem>                         | C14H11F3N2OS   | 312.31  |                                                                                                                                                                                                                                                                                                                                 |                                                                                                                                                                                           |

|                          |               |                                                                                                                                                    |               |         |                                                                                                                                                                                                                                                                                                                                                                                                                  |
|--------------------------|---------------|----------------------------------------------------------------------------------------------------------------------------------------------------|---------------|---------|------------------------------------------------------------------------------------------------------------------------------------------------------------------------------------------------------------------------------------------------------------------------------------------------------------------------------------------------------------------------------------------------------------------|
|                          |               |                                                                                                                                                    |               |         | Probenecid; Probenecide; Probalan; Probampicin; Benemid Tab 500mg; Probenecida; Probenecid; 4-(N,N-Dipropylsulfamoyl)benzoic acid; Benemid; Probenecid acid; Benuryl; Proben; Probenecidum; probenecid; Probecid; 4-((Dipropylamino)sulfonyl)benzoic acid; C07372; Benecid; D00475; Probenecid and Colchicine; P-(Dipropylsulfamoyl)benzoic acid; 4-(Di-N-propylsulfamoyl)benzoic acid; probenecidum; PROBENECID |
| Tocris                   | 4107          | <chem>CCCN(CCC)[S](=O)(=O)C1=CC=C(C(=C1)C(=O)O)</chem>                                                                                             | C13H19NO4S    | 285.359 | Bosutinib; SKI-606; Bosulif; Bosulif; Bosutinib; D03252; BOSUTINIB; bosutinib.H2O; bosutinib hydrate; bosutinibum; SKI 606; bosutinib; 4-((2,4-Dichloro-5-methoxyphenyl)amino)-6-methoxy-7-(3-(4-methyl-1-piperazinyl)propoxy)-3-quinolinecarbonitrile; Bosutinib Monohydrate; PF-5208763; Bosutinib monohydrate                                                                                                 |
| Tocris                   | 4361          | <chem>OCC1=C(Cl)C=C(Cl)C(=C1)NC2=C3C=C(OC)C(=CC3=NC=C2C#N)OCCC</chem>                                                                              | C26H29Cl2N5O3 | 530.446 |                                                                                                                                                                                                                                                                                                                                                                                                                  |
| Apollo Scientific        | BI TP1545     | <chem>N4CCN(C)CC4OC(=O)C[C@@H]1NC(=O)CNC(=O)[C@H](CCCCNC(=N)N)NC(=O)CCSC[C@H](NC(=O)[C@H]2N(C(=O)[C@@H](NC1=O)Cc1c[nH]c3c1cccc3)CCC2)C(=O)N</chem> | C35H49N11O9S2 | 831.96  | Human Eptifibatide                                                                                                                                                                                                                                                                                                                                                                                               |
| AstaTech Cayman Chemical | F 16272 10170 | <chem>O[C@H]1CCC2(C(=CC[C@H]3[C@@H]2CC2=C(C)[C@]4(CC[C@@H]32)O[C@@H]2[C@H]([C@H]4C)NC[C@H](C2)C)C1)C</chem>                                        | C27H41NO2     | 411.62  | CYCLOPAMINE                                                                                                                                                                                                                                                                                                                                                                                                      |
| Axon                     |               | <chem>OB(CCSC[C@@H](C(=O)O)N)O</chem>                                                                                                              | C5H12BNO4S    | 193.03  | BEC                                                                                                                                                                                                                                                                                                                                                                                                              |
| Medchem                  | 2003          | <chem>COc1cccc(c1C1=NCc2c(c3c1cc(Cl)cc3)nc(nc2)Nc1ccc(c(c1)OC)C(=O)O)F</chem>                                                                      | C27H20ClFN4O4 | 518.92  | MLN 8237                                                                                                                                                                                                                                                                                                                                                                                                         |
| Medchem Express          | HY-16768      | <chem>OC(=O)Cc1c(C)n(c2c1ccc2)Cc1ccc(cc1C(F)(F)F)S(=O)(=O)C</chem>                                                                                 | C19H17F3N2O4S | 426.41  | Fevipirant 4-(6-(4-(piperazin-1-yl)phenyl)pyrazolo[1,5-a]pyrimidin-3-yl)quinoline                                                                                                                                                                                                                                                                                                                                |
| ChemShuttle              | 109785        | <chem>N1CCN(CC1)c1ccc(cc1)c1cnc2n(c1)ncc2c1ccnc2c1cccc2</chem>                                                                                     | C25H22N6      | 406.48  |                                                                                                                                                                                                                                                                                                                                                                                                                  |

|                               |           |                                                                  |               |         |                                                                                                                                                                                                                                                                                                                                                                                                                                                                                                                                                                                                                                                                                                                                                                                                                                                                                                |
|-------------------------------|-----------|------------------------------------------------------------------|---------------|---------|------------------------------------------------------------------------------------------------------------------------------------------------------------------------------------------------------------------------------------------------------------------------------------------------------------------------------------------------------------------------------------------------------------------------------------------------------------------------------------------------------------------------------------------------------------------------------------------------------------------------------------------------------------------------------------------------------------------------------------------------------------------------------------------------------------------------------------------------------------------------------------------------|
|                               |           |                                                                  |               |         | zirconium imido;<br>Histamine; Histamine<br>Dihydrochloride;<br>Histamine diphosphate<br>monohydrate; imido<br>vanadium; Alo<br>Therapeutic Massage<br>Pain Relieving; Histamine<br>dihydrochloride; titanium<br>imido dichloride;<br>histamine; histaminium;<br>HISTAMINE<br>HYDROCHLORIDE; HD-<br>O; Arthritis Relief;<br>niobium imido; rhodium<br>imido; Imido; Histamine<br>Phosphate; Histamine<br>Phosphate Injection USP,<br>1mg/ml; Histamine<br>phosphate; Histamine<br>biphosphate; MX-8899;<br>Histamine diphosphate;<br>Bichlorhydrate<br>d'histamine; Histamine<br>Positive skin test control;<br>HISTAMINE<br>DIHYDROGEN<br>PHOSPHATE; Imido<br>titanium; HISTAMINE; b-<br>Aminoethylglyoxaline;<br>titanium imido; histamine<br>amine; Dr. Freds Miracle<br>Rub; IMIDO<br>DIPHOSPHATE;<br>Histatrol; Histamine<br>Phosphate Injection USP<br>Liq Sc; Histaminium;<br>HISTAMINE |
| Tocris                        | 3545      | NCCC1=C[NH]C=N1                                                  | C5H9N3        | 111.145 |                                                                                                                                                                                                                                                                                                                                                                                                                                                                                                                                                                                                                                                                                                                                                                                                                                                                                                |
| Tocris                        | 3793      | OC(=O)C1=C(NC(=O)N2CCC(CC2)C3=C(C=CC=C3)C(F)(F)F)C=CC=C1         | C20H19F3N2O3  | 392.372 | A 1120; A-1120; 2-[(4-{2-(trifluoromethyl)phenyl}piperidin-1-yl)carbonyl]amino]benzoic acid                                                                                                                                                                                                                                                                                                                                                                                                                                                                                                                                                                                                                                                                                                                                                                                                    |
| Tocris                        | 4152      | 4                                                                | C21H14ClFN2O2 | 380.799 | TMN 355                                                                                                                                                                                                                                                                                                                                                                                                                                                                                                                                                                                                                                                                                                                                                                                                                                                                                        |
| Tocris                        | 4370      | C1=CN=C(C=C1)NC4=NC2=C(C(CCC3=N[NH]C=C23)S4                      | C14H13N5S     | 283.352 | TC-N 22A<br>3-((4-(trifluoromethyl)phenyl)amino)benzoic acid                                                                                                                                                                                                                                                                                                                                                                                                                                                                                                                                                                                                                                                                                                                                                                                                                                   |
| Oxchem<br>Axon                | AX8288312 | OC(=O)c1cccc(c1)Nc1ccc(cc1)C(F)(F)F                              | C14H10F3NO2   | 281.23  |                                                                                                                                                                                                                                                                                                                                                                                                                                                                                                                                                                                                                                                                                                                                                                                                                                                                                                |
| Medchem<br>Cayman             | 1130      | O=C(N1CCCC1)Nc1cccc(c1)Nc1ccc(c(n1)NCCC1c[nH]cn1)Br              | C20H23BrN8O   | 471.35  | BX 912                                                                                                                                                                                                                                                                                                                                                                                                                                                                                                                                                                                                                                                                                                                                                                                                                                                                                         |
| Chemical<br>Bide<br>Pharmatec | 18095     | CNc1nc(cc(n1)c1ccc2c(c1)[nH]nc2N)N1C[C@H](CC[C@H]1C)C(=O)NC1CC   | C25H34N8O     | 462.59  | GSK2334470                                                                                                                                                                                                                                                                                                                                                                                                                                                                                                                                                                                                                                                                                                                                                                                                                                                                                     |
| h<br>Medchem                  | BD237663  | COc1cccc(c1c1ccc(cc1)C[C@@H](C(=O)O)NC(=O)c1c(Cl)cccc1Cl)OC      | C24H21Cl2NO5  | 474.33  | TR-14035                                                                                                                                                                                                                                                                                                                                                                                                                                                                                                                                                                                                                                                                                                                                                                                                                                                                                       |
| Express                       | HY-11004  | N#CC(c1cccc(c1)C(=O)Nc1ccc(c(c1)Nc1ccc2c(c1)c(=O)n(cn2)C)C)(C)C  | C27H25N5O2    | 451.52  | AZ 628<br>1-(5-(tert-butyl)isoxazol-3-yl)-3-(4-(7-(2-morpholinoethoxy)benzo[d]imidazo[2,1-b]thiazol-2-yl)phenyl)urea                                                                                                                                                                                                                                                                                                                                                                                                                                                                                                                                                                                                                                                                                                                                                                           |
| ChemShutt<br>le               | 105147    | O=C(Nc1noc(c1)C(C)(C)C)Nc1ccc(cc1)c1cn2c(n1)sc1c2ccc(c1)OCCN1CCO | C29H32N6O4S   | 560.67  |                                                                                                                                                                                                                                                                                                                                                                                                                                                                                                                                                                                                                                                                                                                                                                                                                                                                                                |



|                                                      |         |                                                               |             |         |                                                                                                                                                                                                                                                                                                                                                    |                                                                                                                                                                                                                                                                                                                                                                                                                                                                                                                                                                                                                                                                                                                                                                                                                                     |
|------------------------------------------------------|---------|---------------------------------------------------------------|-------------|---------|----------------------------------------------------------------------------------------------------------------------------------------------------------------------------------------------------------------------------------------------------------------------------------------------------------------------------------------------------|-------------------------------------------------------------------------------------------------------------------------------------------------------------------------------------------------------------------------------------------------------------------------------------------------------------------------------------------------------------------------------------------------------------------------------------------------------------------------------------------------------------------------------------------------------------------------------------------------------------------------------------------------------------------------------------------------------------------------------------------------------------------------------------------------------------------------------------|
|                                                      |         |                                                               |             |         |                                                                                                                                                                                                                                                                                                                                                    | Dopamine Hydrochloride;<br>dopaminium cation;<br>Hydroxytyramine;<br>Dopamine hydrochloride;<br>Intropin; DA; Dopamina;<br>C03758; Dopamine HCl; 4-<br>(2-Aminoethyl)pyrocatechol;<br>Dynatra; dopamine;<br>Revimine; Dopamine Hcl<br>Inj 4%; DOPAMINE<br>HYDROCHLORIDE; 2-<br>(3,4-Dihydroxyphenyl)ethylami<br>ne; 4-(2-Aminoethyl)catechol;<br>Tensamin; Dopaminum;<br>Dopamine;<br>Hydroxytyramin; Intropin<br>Injection 40mg/ml;<br>Dopamine Hydrochloride<br>and Dextrose;<br>DOPAMINE;<br>dopaminium(1+ );<br>dopaminum; Rascordin;<br>Sabax Dopamin; Dopamin-<br>Natterman;<br>Deoxyepinephrine;<br>Dopamine methiodide;<br>Oxytyramine; 3-<br>Hydroxytyramine;<br>Dophamine; Dopamine<br>Hcl; 3,4-Dihydroxyphenethylamine;<br>4-(2-Aminoethyl)-1,2-<br>benzenediol; 4-(2-Aminoethyl)benzene-1,2-<br>diol; dopamina; Dopamin |
| Tocris                                               | 3548    | NCCC1=CC(=C(O)C=C1)O                                          | C8H11NO2    | 153.178 |                                                                                                                                                                                                                                                                                                                                                    |                                                                                                                                                                                                                                                                                                                                                                                                                                                                                                                                                                                                                                                                                                                                                                                                                                     |
| Tocris                                               | 3826    | OC1=C(C2=C(C=C1)C(=O)C=C(O2)C3=CC=CC=C3)O                     | C15H10O4    | 254.238 | 7,8-Dihydroxyflavone; 7,8-DIHYDROXYFLAVONE;                                                                                                                                                                                                                                                                                                        |                                                                                                                                                                                                                                                                                                                                                                                                                                                                                                                                                                                                                                                                                                                                                                                                                                     |
| Tocris                                               | 4171    | FC1=CC(=CC=C1)N2CNC(=O)C23CCN(CCNC(=O)C4=CC5=CC=CC=C5C=C4)CC3 | C26H27FN4O2 | 446.517 | 7,8-Dihydroxyflavone<br>VU 0364739<br>hydrochloride; VU-0364739                                                                                                                                                                                                                                                                                    |                                                                                                                                                                                                                                                                                                                                                                                                                                                                                                                                                                                                                                                                                                                                                                                                                                     |
| Tocris                                               | 4427    | CC(C)COC1=CC=C(C=C1C#N)C2=NC(=C(S2)C(O)=O)C                   | C16H16N2O3S | 316.375 | Febuxostat; febuxostat;<br>Febuxostat potassium;<br>Adenuric; Febric;<br>Febuxostat; Feburic;<br>Uloric; TEI-6720;<br>Febuxostat lysine salt;<br>Febuxostat<br>triethanolamine salt;<br>Febuxostat sodium;<br>FEBUXOSTAT; TMX-67;<br>Febuxostat choline<br>salt; Febuxostat<br>tromethamine;<br>febuxostatium;<br>Febuxostat triethylamine<br>salt |                                                                                                                                                                                                                                                                                                                                                                                                                                                                                                                                                                                                                                                                                                                                                                                                                                     |
| Key<br>Organics/B<br>IONET -<br>BioChem<br>als Stock | SS-4313 | CCCCCCCCCCCCCOc1ccc(o1)C(=O)O                                 | C19H32O4    | 324.45  | TOFA, RMI 14514                                                                                                                                                                                                                                                                                                                                    |                                                                                                                                                                                                                                                                                                                                                                                                                                                                                                                                                                                                                                                                                                                                                                                                                                     |

|                               |                       |                                                                                                                                                    |                                |                  |                                                                                                                                                                                                                                                                                                                                                                                         |
|-------------------------------|-----------------------|----------------------------------------------------------------------------------------------------------------------------------------------------|--------------------------------|------------------|-----------------------------------------------------------------------------------------------------------------------------------------------------------------------------------------------------------------------------------------------------------------------------------------------------------------------------------------------------------------------------------------|
| Cayman Chemical               | 15403                 | <chem>CCOC(=O)NCCCC(=O)NCCc1cccc1</chem>                                                                                                           | C15H22N2O3                     | 278.35           | CAY10683                                                                                                                                                                                                                                                                                                                                                                                |
| Cayman Chemical               | 10008933              | <chem>CC(=O)c1ccc2c(c1)[C@@H]1C=CC[C@@H]1[C@@H](N2)c1cc2OCOc2c1Br</chem>                                                                           | C21H18BrNO3                    | 412.28           | G-1<br>Selisistat S-enantiomer(EX-527 S-enantiomer)                                                                                                                                                                                                                                                                                                                                     |
| AbovChem Medchem Express      | HY-15452A<br>HY-18305 | <chem>NC(=O)[C@H]1CCCC2c1[nH]c1c2cc(cc1)Cl</chem><br><chem>O=C(C(C)C)Nc1ncc(s1)c1cc(nn1c1c(Cl)cccc1Cl)C(F)F</chem>                                 | C13H13ClN2O<br>C17H14Cl2F2N4OS | 248.71<br>431.29 | BMS-5<br>4-[4-[4-[4-fluoro-3-(trifluoromethyl)phenyl]-1-methylimidazol-2-yl]piperidin-1-yl]-1H-pyrazolo[3,4-d]pyrimidine<br>GSK 650394; GSK-650394<br>Rotigotine hydrochloride; Rotigotine; Neupro; N-0437; D05768<br>RWJ 50271; RWJ-50271<br>4&mu; 8C<br>N-(2,2,2-trifluoroethyl)-9-(4-(4-(4-(trifluoromethyl)biphenyl-2-ylcarboxamido)piperidin-1-yl)butyl)-9H-fluorene-9-carboxamide |
| ChemShuttle                   | 134398                | <chem>Cn1cc(nc1C1CCN(CC1)c1ncc2c1cn[nH]2)c1ccc(c(c1)C(F)F)F</chem>                                                                                 | C21H19F4N7                     | 445.42           | pyrazolo[3,4-d]pyrimidine<br>GSK 650394; GSK-650394                                                                                                                                                                                                                                                                                                                                     |
| Tocris                        | 3572                  | <chem>OC(=O)C1=C(C=C(C=C1)C2=C[NH]C3=NC=C(C=C23)C4=CC=CC=C4)C5CCCC5</chem>                                                                         | C25H22N2O2                     | 382.454          | 650394<br>Rotigotine hydrochloride; Rotigotine; Neupro; N-0437; D05768<br>RWJ 50271; RWJ-50271<br>4&mu; 8C<br>N-(2,2,2-trifluoroethyl)-9-(4-(4-(4-(trifluoromethyl)biphenyl-2-ylcarboxamido)piperidin-1-yl)butyl)-9H-fluorene-9-carboxamide                                                                                                                                             |
| Tocris                        | 3896                  | <chem>CCCN(CCC1=CC=CS1)C2CCC3=C(C2)C=CC=C3O</chem>                                                                                                 | C19H25NOS                      | 315.473          | 0437; D05768                                                                                                                                                                                                                                                                                                                                                                            |
| Tocris                        | 4227                  | <chem>CC1=C(C=C[N]1)C2=NC(=CS2)C3=CC=CC(=C3)C(F)F)C(=O)NCCCCO</chem>                                                                               | C18H17F3N4O2S                  | 410.413          | RWJ 50271; RWJ-50271                                                                                                                                                                                                                                                                                                                                                                    |
| Tocris                        | 4479                  | <chem>CC1=CC(=O)OC2=C1C=CC(=C2C=O)O</chem>                                                                                                         | C11H8O4                        | 204.179          | 4&mu; 8C<br>N-(2,2,2-trifluoroethyl)-9-(4-(4-(4-(trifluoromethyl)biphenyl-2-ylcarboxamido)piperidin-1-yl)butyl)-9H-fluorene-9-carboxamide                                                                                                                                                                                                                                               |
| Shanghai AQBioPharma Co. Ltd. | ABF 12752             | <chem>O=C(c1cccc1c1ccc(cc1)C(F)F)NC1CCN(CC1)CCCCC1(C(=O)NCC(F)F)F)c2cccc2c2c1cccc2</chem>                                                          | C39H37F6N3O2                   | 693.72           | 650394<br>Rotigotine hydrochloride; Rotigotine; Neupro; N-0437; D05768<br>RWJ 50271; RWJ-50271<br>4&mu; 8C<br>N-(2,2,2-trifluoroethyl)-9-(4-(4-(4-(trifluoromethyl)biphenyl-2-ylcarboxamido)piperidin-1-yl)butyl)-9H-fluorene-9-carboxamide                                                                                                                                             |
| Cayman Chemical               | 10007927              | <chem>OC(=O)CCCCCCCCCN(C(=O)NC12CC3CC(C2)CC(C1)C3</chem>                                                                                           | C23H40N2O3                     | 392.58           | AUDA                                                                                                                                                                                                                                                                                                                                                                                    |
| Cayman Chemical               | 17408                 | <chem>[O-][N+](=O)c1ccc(cc2c1non2)Nc1cccc1c1cccc1</chem>                                                                                           | C18H12N4O3                     | 332.31           | 10074-G5                                                                                                                                                                                                                                                                                                                                                                                |
| AbovChem Medchem Express      | HY-10442<br>HY-13259  | <chem>Nc1nccc2c1ncc2[C@@H]1C=C([C@H]1([C@H]1O)O)CO</chem><br><chem>O=C[C@@H](NC(=O)[C@@H](NC(=O)[C@@H](NC(=O)OCc1cccc1)CC(C)C)CC(C)C)CC(C)C</chem> | C12H14N4O3<br>C26H41N3O5       | 262.26<br>475.62 | 3-Deazaneplanocin A<br>MG-132                                                                                                                                                                                                                                                                                                                                                           |
| Selleck Chemicals             | S7252                 | <chem>O=C(/C=C\c1n1cnc(n1)c1cc(cc(c1)C(F)F)C(F)F)Nn1cncn1</chem>                                                                                   | C17H11F6N7O                    | 443.31           | KPT-330                                                                                                                                                                                                                                                                                                                                                                                 |

|            |          |                                                                                                          |               |         |                                                                                                                                                                                                                                                                                                                                                                                                |                                                                                                                                                                                                                                                                                                                                                                                                                                                                                                                                                                                                                                                                                              |
|------------|----------|----------------------------------------------------------------------------------------------------------|---------------|---------|------------------------------------------------------------------------------------------------------------------------------------------------------------------------------------------------------------------------------------------------------------------------------------------------------------------------------------------------------------------------------------------------|----------------------------------------------------------------------------------------------------------------------------------------------------------------------------------------------------------------------------------------------------------------------------------------------------------------------------------------------------------------------------------------------------------------------------------------------------------------------------------------------------------------------------------------------------------------------------------------------------------------------------------------------------------------------------------------------|
|            |          |                                                                                                          |               |         |                                                                                                                                                                                                                                                                                                                                                                                                | Tizanidine hydrochloride;<br>Cimbrar; Sizolan; Sirdalid;<br>Tizanidine; Ternelin;<br>Telzanine; Tizan; DS-103282; Sirdalud;<br>Tizanidine hydrochloride;<br>TIZANIDINE; Tizanidine succinate; Tizalud;<br>Musant; Tizanidina;<br>Tizaflex; DS-103282 ch;<br>Zanaflex; ZANAFLEX; 5-Chloro-4-(2-imidazolin-4-on-2-ylamino)-2, 1, 3-benzothiazdiazole; 5-Chloro-4-(2-imidazolin-2-ylamino)-2, 1, 3-benzothiadiazole;<br>Zanpeak; Tizadin; Pal-tizanidine; Tizanidin;<br>tizanidine; Sirdalud MR; Tizanidinum; Navizan; Mylan-tizanidine;<br>Tizanidine HCl;<br>TIZANIDINE<br>HYDROCHLORIDE;<br>Tizanidine Hydrochloride;<br>Spaslax; Relaxkov; NVD-422; Myores; AN-021A;<br>Tizanidine sulfate; |
| Tocris     | 3609     | <chem>C1C1=C(NC2=NCCN2)C3=NSN=C3C=C1</chem>                                                              | C9H8ClN5S     | 253.711 | Zitanid; C07452                                                                                                                                                                                                                                                                                                                                                                                |                                                                                                                                                                                                                                                                                                                                                                                                                                                                                                                                                                                                                                                                                              |
| Tocris     | 3912     | <chem>CN1C2=CC=C(C(C=C2N=C(C3=CC=C(C(C=C3)C(O)=O)C4=CC5=C(C(C=C14)C(C)(C)CCC5(C)C)[N+](O-)=O</chem>      | C29H29N3O4    | 483.558 | HX 531; HX-531                                                                                                                                                                                                                                                                                                                                                                                 |                                                                                                                                                                                                                                                                                                                                                                                                                                                                                                                                                                                                                                                                                              |
| Tocris     | 4255     | <chem>COC1=CC(=CC(=C1)OC)C(=O)NNC(=O)NC2=CC=CC3=C2C=CC=C3</chem>                                         | C20H19N3O4    | 365.383 | TC-O 9311                                                                                                                                                                                                                                                                                                                                                                                      |                                                                                                                                                                                                                                                                                                                                                                                                                                                                                                                                                                                                                                                                                              |
|            |          |                                                                                                          |               |         | Paliperidone;<br>PALIPERIDONE<br>PALMITATE; R-76477;<br>Ro-76477;<br>PALIPERIDONE; 9-Hydroxyrisperidone;<br>Paliperidone; Invega;<br>D05339; SID90341688; 3-{2-[4-(6-fluoro-1,2-benzoxazol-3-yl)piperidin-1-yl]ethyl}-9-hydroxy-2-methyl-6, 7, 8, 9-tetrahydropyrido[1,2-a]pyrimidin-4-one;<br>paliperidona; Invega Sustenna; paliperidonum;<br>Paliperidone Palmitate;<br>JNS-007ER; RO-76477 |                                                                                                                                                                                                                                                                                                                                                                                                                                                                                                                                                                                                                                                                                              |
| Tocris     | 4493     | <chem>CC5=C(CCN1CCC(CC1)C2=NO C3=CC(=CC=C23)F)C(=O)N4CCCC(O)C4=N5</chem>                                 | C23H27FN4O3   | 426.484 | JNS-007ER; RO-76477                                                                                                                                                                                                                                                                                                                                                                            |                                                                                                                                                                                                                                                                                                                                                                                                                                                                                                                                                                                                                                                                                              |
| Pharmablo  |          |                                                                                                          |               |         |                                                                                                                                                                                                                                                                                                                                                                                                |                                                                                                                                                                                                                                                                                                                                                                                                                                                                                                                                                                                                                                                                                              |
| ck - US    |          |                                                                                                          |               |         |                                                                                                                                                                                                                                                                                                                                                                                                |                                                                                                                                                                                                                                                                                                                                                                                                                                                                                                                                                                                                                                                                                              |
| Stock      | PBLJ6619 | <chem>OC[C@H]1N[C@H]([C@@H]([C@@H]1O)O)c1c[nH]c2c1nc[nH]c2=O</chem>                                      | C11H14N4O4    | 266.25  | Forodesine                                                                                                                                                                                                                                                                                                                                                                                     |                                                                                                                                                                                                                                                                                                                                                                                                                                                                                                                                                                                                                                                                                              |
| Cayman     |          | <chem>Fc1cc(F)cc(c1)[C@@H](C(=O)N)[C@H](C(=O)N)[C@H]1c2cccc2c2c(N(C1=O)C)cccc2)C)O</chem>                | C26H23F2N3O4  | 479.48  | LY411575                                                                                                                                                                                                                                                                                                                                                                                       |                                                                                                                                                                                                                                                                                                                                                                                                                                                                                                                                                                                                                                                                                              |
| Chemical   | 16162    |                                                                                                          |               |         |                                                                                                                                                                                                                                                                                                                                                                                                |                                                                                                                                                                                                                                                                                                                                                                                                                                                                                                                                                                                                                                                                                              |
| ChemPacifi |          |                                                                                                          |               |         |                                                                                                                                                                                                                                                                                                                                                                                                |                                                                                                                                                                                                                                                                                                                                                                                                                                                                                                                                                                                                                                                                                              |
| c          | 33433    | <chem>COC(=O)CCc1ccc(cc1)OCC(CNC(C)C)O</chem>                                                            | C16H25NO4     | 295.37  | Esmolol                                                                                                                                                                                                                                                                                                                                                                                        |                                                                                                                                                                                                                                                                                                                                                                                                                                                                                                                                                                                                                                                                                              |
| Medchem    |          | <chem>C#CCC(c1ccc(cc1)C(=O)N)[C@H](C(=O)O)CCC(=O)O)Cc1cnc2c(n1)c(N)n</chem>                              |               |         |                                                                                                                                                                                                                                                                                                                                                                                                |                                                                                                                                                                                                                                                                                                                                                                                                                                                                                                                                                                                                                                                                                              |
| Express    | HY-10446 | <chem>c(n2)N</chem>                                                                                      | C23H23N7O5    | 477.47  | Pralatrexate                                                                                                                                                                                                                                                                                                                                                                                   |                                                                                                                                                                                                                                                                                                                                                                                                                                                                                                                                                                                                                                                                                              |
| Medchem    |          |                                                                                                          |               |         |                                                                                                                                                                                                                                                                                                                                                                                                |                                                                                                                                                                                                                                                                                                                                                                                                                                                                                                                                                                                                                                                                                              |
| Express    | HY-15667 | <chem>[O-][N+](=O)c1cc(sc1Sc1cccc(c1Cl)Cl)C(=O)C</chem>                                                  | C12H7Cl2NO3S2 | 348.22  | P005091                                                                                                                                                                                                                                                                                                                                                                                        |                                                                                                                                                                                                                                                                                                                                                                                                                                                                                                                                                                                                                                                                                              |
| Selleck    |          | <chem>O=C1C=C2C(=CC=C3[C@@H]2(C)CC[C@@H]3(C)CC[C@@H]3(C)[C@@H]2C[C@@H](C)(CC3)C(=O)O)C)C)C(=C1O)C</chem> | C29H38O4      | 450.61  | Celastrol                                                                                                                                                                                                                                                                                                                                                                                      |                                                                                                                                                                                                                                                                                                                                                                                                                                                                                                                                                                                                                                                                                              |
| Chemicals  | S1290    |                                                                                                          |               |         |                                                                                                                                                                                                                                                                                                                                                                                                |                                                                                                                                                                                                                                                                                                                                                                                                                                                                                                                                                                                                                                                                                              |

|        |      |                                                                                            |            |         |                                                                                                                                                                                                                                                                                                                                                                                                                                                                                                                                                                                                                                                                                                                                                                                                  |
|--------|------|--------------------------------------------------------------------------------------------|------------|---------|--------------------------------------------------------------------------------------------------------------------------------------------------------------------------------------------------------------------------------------------------------------------------------------------------------------------------------------------------------------------------------------------------------------------------------------------------------------------------------------------------------------------------------------------------------------------------------------------------------------------------------------------------------------------------------------------------------------------------------------------------------------------------------------------------|
|        |      |                                                                                            |            |         | Acamprosate calcium;<br>ACAMPROSATE;<br>Campral; Acamprosate<br>calcium; Regtect;<br>Acamprosate Calcium;<br>Zulex; N-<br>Acetylhomotaurine;<br>Sobriol; Acamprosate;<br>CaAOTA; Acamprosato;<br>acamprosate calcium;<br>ACAMPROSATE<br>CALCIUM; N-acetyl<br>homotaurine; calcium<br>acetylhomotaurinate;<br>Acamprosat; Calcium<br>Bisacetyl Homotaurine;<br>Aotal; Acamprosatum;<br>Alcomed; D02780; CA-<br>Aota; 3-Acetamido-1-<br>propanesulfonic acid;<br>calcium acetyl<br>homotaurinate; NS-11;<br>SNC-102; acamprosate(1-<br>); acamprosate;<br>acamprosatum                                                                                                                                                                                                                             |
| Tocris | 3618 | <chem>CC(=O)NCCC[S](=O)(=O)O</chem>                                                        | C5H11NO4S  | 181.21  | Pyrimethamine;<br>Chloridine;<br>PYRIMETHAMINE;<br>Primethamine;<br>Pyrimethaminum;<br>pirimecidan;<br>pyrimethamine; EXR-101;<br>Pyrimethamine;<br>Daraprim;<br>Diaminopyritamin;<br>Pirimetamina; 2,4-<br>Diamino-5-chlorophenyl-6-<br>ethylpyrimidine; 2,4-<br>Diamino-5-(4-<br>chlorophenyl)-6-<br>ethylpyrimidine; CD;<br>chloridine; Malacide;<br>Pyrimethamin; Fansidar<br>Tablets; 5-(4-<br>Chlorophenyl)-6-ethyl-2,4-<br>pyrimidinediamine;<br>Chloridyn;<br>Ethylpyrimidine; 5-(4-<br>Chlorophenyl)-6-ethyl-2,4-<br>diaminopyrimidine; 5-(4'-<br>Chlorophenyl)-2,4-diamino-<br>6-ethylpyrimidine;<br>pirimetamin; Chloridin; 2,4-<br>Diamino-5-(P-<br>chlorophenyl)-6-<br>ethylpyrimidine; D00488;<br>darachlor; Malocide; TRP-<br>004; C07391;<br>Pyremethamine;<br>Pyrimethamine Hcl |
| Tocris | 3918 | <chem>CCC1=C(C(=NC(=N1)N)N)C2=CC=C(C1)C=C2</chem>                                          | C12H13ClN4 | 248.711 |                                                                                                                                                                                                                                                                                                                                                                                                                                                                                                                                                                                                                                                                                                                                                                                                  |
| Tocris | 4343 | <chem>COC1=CC2=C(NC3CCN(CC3)C(C)C)N=C(N=C2C=C1OCCCN4CCCC4)C5C</chem><br><chem>CCCC5</chem> | C30H47N5O2 | 509.726 | UNC 0638; UNC-0638                                                                                                                                                                                                                                                                                                                                                                                                                                                                                                                                                                                                                                                                                                                                                                               |

[illegible]

|           |            |                                                                                              |               |        |                            |
|-----------|------------|----------------------------------------------------------------------------------------------|---------------|--------|----------------------------|
| AbovChem  | HY-N0127   | <chem>COC(=O)[C@H]1[C@@H](O)CC[C@@H]2[C@@H]1C[C@@H]1N(C2)CCc2c1[nH]c1c2cccc1</chem>          | C21H26N2O3    | 354.44 | Yohimbine                  |
| Pharmablo |            |                                                                                              |               |        | benzamide, n-              |
| ck - US   |            |                                                                                              |               |        | (cyanomethyl)-4-[2-[[4-(4- |
| Stock     | PBLJ6152   | <chem>N#CCNC(=O)c1ccc(cc1)c1ccnc(n1)Nc1ccc(cc1)N1CCOCC1</chem>                               | C23H22N6O2    | 414.46 | morpholinyl)phenyl]amino]- |
| Combi-    |            |                                                                                              |               |        | 4-pyrimidinyl]-            |
| Blocks    | QE-9393    | <chem>Oc1ccc2c(c1)Oc1c(C32OC(=O)c2c3cccc2)ccc(c1)O</chem>                                    | C20H12O5      | 332.31 | Fluorescein                |
| Advanced  |            |                                                                                              |               |        |                            |
| ChemBlock |            |                                                                                              |               |        |                            |
| s - In    |            |                                                                                              |               |        |                            |
| Stock     | G-7963     | <chem>CNC(=O)c1ccc(cc1F)N1C(=S)N(C(=O)C1(C)C)c1ccc(c(c1)C(F)(F)F)C#N</chem>                  | C21H16F4N4O2S | 464.44 |                            |
| Target    |            |                                                                                              |               |        |                            |
| Molecule  | T 1803     | <chem>OCCNC(=O)c1cccc(c1)c1ncnc(c1)Nc1ccc(cc1)OC(F)(F)F</chem>                               | C20H17F3N4O3  | 418.37 | GNF-5                      |
| Target    |            |                                                                                              |               |        |                            |
| Molecule  | T 2504     | <chem>O=C(N(c1nc(c(s1)S(=O)(=O)N)C)C)Cc1ccc(c1)c1ccccc1</chem>                               | C18H18N4O3S2  | 402.49 | BAY 57-1293                |
| Target    |            |                                                                                              |               |        |                            |
| Molecule  | T 3067     | <chem>O=c1sn(c(=O)n1Cc1ccccc1)c1cccc2c1cccc2</chem>                                          | C19H14N2O2S   | 334.39 | Tideglusib                 |
| Target    |            |                                                                                              |               |        |                            |
| Molecule  | T 1947     | <chem>NCCCCCNc1cc(NCc2ccccc2)n2c(n1)c(cn2)C(C)C</chem>                                       | C22H32N6      | 380.53 | BS-181                     |
| AstaTech  | 41167      | <chem>CN(Cc1cccc2c1cccc2)C/C=C/C#CC(C)(C)C</chem>                                            | C21H25N       | 291.43 | TERBINAFINE HCL            |
| Bide      |            |                                                                                              |               |        |                            |
| Pharmatec |            |                                                                                              |               |        |                            |
| h         | BD145505   | <chem>CCOc1cc(ccc1C(=O)O)CC(=O)N[C@H](c1ccccc1N1CCCCC1)CC(C)C</chem>                         | C27H36N2O4    | 452.59 | Repaglinide                |
| Pharmablo |            |                                                                                              |               |        |                            |
| ck - US   |            |                                                                                              |               |        |                            |
| Stock     | PBN2011567 | <chem>CCN(CCN(C(=O)Cn1c(SCc2ccc(cc2)F)nc(=O)c2c1CCC2)Cc1ccc(cc1)c1ccc(cc1)C(F)(F)F)CC</chem> | C36H38F4N4O2S | 666.77 | Darapladib                 |
| Cayman    |            |                                                                                              |               |        |                            |
| Chemical  | 15785      | <chem>ONC(=O)c1ccc(cc1)Cn1c2ccccc2c2c1CCN(C2)C</chem>                                        | C20H21N3O2    | 335.4  | Tubastatin A               |
| Vitas M   |            |                                                                                              |               |        |                            |
| Labs - BB | BBL023172  | <chem>COc1ccc(cc1)C(=O)C(=O)c1ccccc1</chem>                                                  | C15H12O3      | 240.25 | BBL023172                  |
| Selleck   |            |                                                                                              |               |        |                            |
| Chemicals | S7500      | <chem>Cc1cc(C)c(c(c1)C)S(=O)(=O)n1cc(cc1C)C</chem>                                           | C15H19NO2S    | 277.38 | HJC0350                    |
| Target    |            |                                                                                              |               |        |                            |
| Molecule  | T0162      | <chem>OCCOCCN1CCN(CC1)C1=Nc2ccccc2Sc2c1ccccc2</chem>                                         | C21H25N3O2S   | 383.51 | Quetiapine                 |
| Target    |            |                                                                                              |               |        |                            |
| Molecule  | T 6278     | <chem>CN1CCN(CC1)c1nc2ccccc2c(n1)C1=C(C(=O)NC1=O)c1c[nH]c2c1cccc2</chem>                     | C25H22N6O2    | 438.48 | Sotrastaurin               |
| Target    |            |                                                                                              |               |        |                            |
| Molecule  | T 3032     | <chem>O=C(c1nc(cnc1N)c1ccc(cc1)S(=O)(=O)C)Nc1ccccc1</chem>                                   | C18H16N4O3S   | 368.41 | VE-821                     |
| Bepharm   | B17734     | <chem>NC[C@@H]1CC[C@H](CC1)C(=O)O</chem>                                                     | C8H15NO2      | 157.21 | Tranexamic acid            |
| Advanced  |            |                                                                                              |               |        |                            |
| ChemBlock |            |                                                                                              |               |        |                            |
| s - In    |            |                                                                                              |               |        |                            |
| Stock     | M15325     | <chem>Cc1cc(C(Nc2ccccc2)C)c2h(c1)c(=O)cc(n2)N1CCOCC1</chem>                                  | C21H24N4O2    | 364.44 | 663619-89-4                |
| Bide      |            |                                                                                              |               |        |                            |
| Pharmatec |            |                                                                                              |               |        |                            |
| h         | BD113240   | <chem>N#Cc1ccccc1Cn1c(cc(=O)n(c1=O)C)N1CCC[C@H](C1)N</chem>                                  | C18H21N5O2    | 339.39 | Alogliptin                 |
| Pharmablo |            |                                                                                              |               |        |                            |
| ck - US   |            |                                                                                              |               |        |                            |
| Stock     | THR0011    | <chem>CC(=O)c1c(C)c2cnc(nc2n(c1=O)C1CCCC1)Nc1ccc(cn1)N1CCNCC1</chem>                         | C24H29N7O2    | 447.53 | palbociclib                |
| Cayman    |            |                                                                                              |               |        |                            |
| Chemical  | 19768      | <chem>CCc1oc2c(c1C(=O)c1cc(Br)c(c1)Br)O)cccc2</chem>                                         | C17H12Br2O3   | 424.08 | Benzbromarone              |
| Advanced  |            |                                                                                              |               |        |                            |
| ChemBlock |            |                                                                                              |               |        |                            |
| s - In    |            |                                                                                              |               |        |                            |
| Stock     | M15125     | <chem>Cc1cnc(nc1Nc1cccc(c1)S(=O)(=O)NC(C)C)Nc1ccc(cc1)OCCN1CCCC1</chem>                      | C27H36N6O3S   | 524.68 |                            |
| Combi-    |            |                                                                                              |               |        |                            |
| Blocks    | QA-4191    | <chem>CC(NC(=O)NS(=O)(=O)c1cncccc1Nc1cccc(c1)C)C</chem>                                      | C16H20N4O3S   | 348.42 | Torasemide                 |
| Target    |            |                                                                                              |               |        |                            |
| Molecule  | T 1611     | <chem>CC(=CC=CC(=CC(=O)O)C)C=CC1=C(C)CCCC1(C)C</chem>                                        | C20H28O2      | 300.44 | Isotretinoin               |
| Target    |            |                                                                                              |               |        | AG-337; Nolatrexed         |
| Molecule  | T 2627     | <chem>Cc1ccc2c(c1Sc1ccncc1)c(=O)nc([nH]2)N</chem>                                            | C14H12N4OS    | 357.26 | 2hydrochloride             |
| Target    |            |                                                                                              |               |        |                            |
| Molecule  | T 1943     | <chem>COc1ccc(cc1)c1cnc2n(c1)ncc2c1ccccc2c1cccn2</chem>                                      | C22H16N4O     | 352.39 | mL347                      |
| Bide      |            |                                                                                              |               |        |                            |
| Pharmatec |            |                                                                                              |               |        |                            |
| h         | BD3002     | <chem>N=C(N[N+](=O)[O-])NCCCC[C@H](C(=O)O)N</chem>                                           | C6H13N5O4     | 219.2  | H-Arg(NO2)-OH              |

|                             |                   |                                                                                                                                                                                                                               |                                         |        |                                                                                                                    |
|-----------------------------|-------------------|-------------------------------------------------------------------------------------------------------------------------------------------------------------------------------------------------------------------------------|-----------------------------------------|--------|--------------------------------------------------------------------------------------------------------------------|
| Combi-Blocks                | QA-9111           | CS <sub>c</sub> 1nc2c([nH]1)cc(c(c2)Cl)O <sub>c</sub> 1cccc(c1Cl)Cl                                                                                                                                                           | C14H9Cl3N2O <sub>5</sub>                | 359.66 | Triclabendazole                                                                                                    |
| Medchem Express             | HY-13501          | FC(c1ccc(cc1)/C=C/c1ccc(n1)CO <sub>c</sub> 1ccc(cc1)CCCCn1ncc1)(F)F                                                                                                                                                           | C25H23F3N4O <sub>2</sub>                | 468.47 | Mubritinib                                                                                                         |
| Pharmablo ck - US           |                   | C=CCn1c(=O)c2c(n1c1cccc(n1)C(O)(C)C)nc(nc2)Nc1ccc(cc1)N1CCN(CC1)C                                                                                                                                                             | C27H32N8O <sub>2</sub>                  | 500.6  | MK-1775                                                                                                            |
| Stock Cayman Chemical       | PBLJ6189<br>20390 | O=C(CNC(=O)C)(Cc1cccc1)CSC(=O)C)OCc1cccc1                                                                                                                                                                                     | C21H23NO <sub>4</sub> S                 | 385.48 | Racecadotril                                                                                                       |
| Advanced ChemBlock s - In   |                   | CCc1cc2C(=O)c3c4ccc(cc4[nH]c3C(c2cc1N1CCC(CC1)N1CCOCC1)(C)C)C#N                                                                                                                                                               | C30H34N4O <sub>2</sub>                  | 482.62 |                                                                                                                    |
| Stock Cayman Chemical       | I-9209<br>15987   | CC1Nc2cc(Cl)c(cc2C(=O)N1c1cccc1C)S(=O)(=O)N                                                                                                                                                                                   | C16H16ClN3O <sub>3</sub> S              | 365.83 | Metolazone                                                                                                         |
| Target Molecule             | T 1330            | CO <sub>c</sub> 1cc(C)c(c(c1C)C)C=CC(=CC=CC(=O)O)C)C                                                                                                                                                                          | C21H26O <sub>3</sub>                    | 326.43 | Acitretin                                                                                                          |
| Target Molecule             | T 2670            | OCc1ccc(o1)c1ccc2c(c1)c(ncn2)NCCc1ccc(o1)C                                                                                                                                                                                    | C19H17N3O <sub>3</sub>                  | 335.36 | mL167                                                                                                              |
| Target Molecule             | T 2588            | O=C(c1c[nH]c2c(c1=O)cccc2)Nc1cc(O)c(cc1C(C)(C)C)C(C)(C)C                                                                                                                                                                      | C24H28N2O <sub>3</sub>                  | 392.49 | Ivacaftor                                                                                                          |
| Bide Pharmatec h            | BD235626          | O=C1CCC(C(=O)N1)N1C(=O)c2c(C1=O)c(N)ccc2                                                                                                                                                                                      | C13H11N3O <sub>4</sub>                  | 273.24 | Pomalidomide                                                                                                       |
| Combi-Blocks                | QA-6056           | Cc1cnc(s1)NC(=O)C1=C(O)c2cccc2S(=O)(=O)N1C                                                                                                                                                                                    | C14H13N3O <sub>4</sub> S <sub>2</sub>   | 351.4  | Meloxicam                                                                                                          |
| Medchem Express             | HY-50898          | Fc1cccc(c1)CO <sub>c</sub> 1ccc(cc1Cl)Nc1nnc2c1cc(cc2)c1ccc(o1)CNCCS(=O)(=O)C                                                                                                                                                 | C29H26ClFN4O <sub>4</sub> S             | 581.06 | Lapatinib                                                                                                          |
| J&K Scientific              | 985371            | OC[C@H]1O[C@H](O)[C@@H]([C@H]([C@H]1O)O)O                                                                                                                                                                                     | C6H12O <sub>6</sub>                     | 180.16 | D-(+)-Glucose, ACS reagent                                                                                         |
| Cayman Chemical             | 14337             | OC(=O)[C@H](Cn1ccc(=O)c(c1)O)N                                                                                                                                                                                                | C8H10N2O <sub>4</sub>                   | 198.18 | L-Mimosine                                                                                                         |
| Advanced ChemBlock s - In   |                   | O=C(Nc1cc(ccc1c1ccsc1)S(=O)(=O)NC1CC1)Nc1cccc(c1)C(F)(F)F                                                                                                                                                                     | C21H18F3N3O <sub>3</sub> S <sub>2</sub> | 481.51 |                                                                                                                    |
| Combi-Blocks                | QE-1174           | C[C@@H]1CC[C@H]([C@@H]([C@H]1O)C)C                                                                                                                                                                                            | C10H20O                                 | 156.27 | L-Menthol                                                                                                          |
| Enzo Life Sciences          | ALX-430-146       | C=CCc1cccc(c1O)/C=N/NC(=O)CN1CCN(CC1)Cc1cccc1                                                                                                                                                                                 | C23H28N4O <sub>2</sub>                  | 392.49 | PAC-1                                                                                                              |
| Target Molecule             | T 6053            | CC(O(C=O)C1=CN(CC(c2c1[nH]c1c2cccc1)(C)C)C(=O)c1ccc(c(c1)F)F)C                                                                                                                                                                | C25H24F2N2O <sub>3</sub>                | 438.47 | Turofexorate Isopropyl (XL335)                                                                                     |
| Target Molecule             | T 1857            | O=C(c1cccc(c1)c1ncc(n1)C(F)(F)F)NCC1(CCOCC1)c1ccc(n1)c1cccc1CC[C@H]1OC(=O)[C@H](C)[C@@H]([C@H]1O)[C@@H]([C@H]([C2](C)OC)O)[C@H](C)[C@@H]([C@H]1O)[C@@H]([C@H]([C@H]2O)N(C)C)[C@H]([C@H]1C(=O)[C@@H]([C@H]([C@H]1(C)O)O)C)C)CO | C25H21F3N4O <sub>3</sub> S              | 514.52 | N-((4-(4-phenylthiazol-2-yl)tetrahydro-2H-pyran-4-yl)methyl)-3-(5-(trifluoromethyl)-1,2,4-oxadiazol-3-yl)benzamide |
| Chem-Impex Bide Pharmatec h | 126<br>BD229143   | OCCOc1c(C)cc(cc1C)c1nc2cc(OC)cc(c2c(=O)[nH]1)OC                                                                                                                                                                               | C20H22N2O <sub>5</sub>                  | 370.4  | RVX-208                                                                                                            |
| Medchem Express             | HY-17386          | O=C1NC(=O)C(S1)Cc1ccc(cc1)OCCN(c1ccccn1)C                                                                                                                                                                                     | C18H19N3O <sub>3</sub> S                | 357.43 | Rosiglitazone                                                                                                      |
| Combi-Blocks                | AN-2948           | Nc1ccc(cc1)S(=O)(=O)N                                                                                                                                                                                                         | C6H8N2O <sub>2</sub> S                  | 172.2  | Sulfanilamide                                                                                                      |
| Cayman Chemical             | 16128             | N#CC(=NNc1ccc(cc1)C1=NNC(=O)C[C@H]1C)C#N                                                                                                                                                                                      | C14H12N6O                               | 280.28 | Levosimendan                                                                                                       |
| Advanced ChemBlock s - In   |                   | O=C(Nc1ccc(cc1N)F)/C=C/c1cnn(c1)C/C=C/c1cccc1                                                                                                                                                                                 | C21H19FN4O                              | 362.4  |                                                                                                                    |
| Enamine BB - US             |                   |                                                                                                                                                                                                                               |                                         |        |                                                                                                                    |
| Stock                       | EN300-123537      | O=c1oc2cccc2c(c1Cc1c(=O)oc2c(c1O)cccc2)O                                                                                                                                                                                      | C19H12O <sub>6</sub>                    | 336.29 | 107753-78-6                                                                                                        |

|                                                                          |                      |                                                                                                                     |               |        |                                                                                                                |
|--------------------------------------------------------------------------|----------------------|---------------------------------------------------------------------------------------------------------------------|---------------|--------|----------------------------------------------------------------------------------------------------------------|
| Key<br>Organics/B<br>IONET -<br>BioChemicals Stock                       | SS-4787              | OCc1cc(ccc1OC)c1ccc2c(n1)nc(nc2N1CCOC[C@@H]1C)N1CCOC[C@@H]1C                                                        | C25H31N5O4    | 465.54 | AZD8055                                                                                                        |
| Target<br>Molecule                                                       | T2044                | CCc1c(C(=O)C(=O)N)c2c(n1Cc1cccc1)cccc2OCC(=O)O                                                                      | C21H20N2O5    | 380.39 | Varespladib                                                                                                    |
| Target<br>Molecule                                                       | T0389                | CCCCCOC(=O)N=C(c1ccc(cc1)NCc1nc2c(n1C)ccc(c2)C(=O)N(c1ccccn1)CCC(=O)OCC)N                                           | C34H41N7O5    | 627.73 | Dabigatran etexilate                                                                                           |
| Combi-<br>Blocks<br>Bide                                                 | QA-4624              | COc1c(C/C=C/C/C(=O)O)\C)c(C)O)c2c(c1C)COC2=O                                                                        | C17H20O6      | 320.34 | Mycophenolic acid                                                                                              |
| Pharmatec<br>h<br>Bide                                                   | BD218703             | OC(=O)COc1ccc(cc1C)SCc1sc(nc1C)c1ccc(cc1)C(F)(F)F                                                                   | C21H18F3NO3S2 | 453.5  | GW 501516                                                                                                      |
| Pharmatec<br>h                                                           | BD55672              | OC(=O)C(c1ccc2c(c1)CC(=O)c1c(S2)cccc1)C                                                                             | C17H14O3S     | 298.36 | Zaltoprofen                                                                                                    |
| Combi-<br>Blocks                                                         | OR-1175              | O=C(NS(=O)(=O)c1ccc(cc1)C)NN1CC2C(C1)CCC2                                                                           | C15H21N3O3S   | 323.41 | Gliclazide                                                                                                     |
| Combi-<br>Blocks                                                         | QA-2612              | Clc1ccc(cc1)OC(C(=O)C(C)(C)C)n1cccc1                                                                                | C15H17ClN2O2  | 292.76 | Climbazole                                                                                                     |
| Pharmablo<br>ck - US<br>Stock                                            | PBLJ6191             | O=C(OCc1cccnc1)NCc1ccc(cc1)C(=O)Nc1ccccc1N                                                                          | C21H20N4O3    | 376.41 | Entinostat<br>3-methyl 5-(2-methylpropyl) 2,6-dimethyl-4-(2-nitrophenyl)-1,4-dihydropyridine-3,5-dicarboxylate |
| Enamine<br>BB - US<br>Stock                                              | EN300-119517         | COC(=O)C1=C(C)NC(=C(C1c1cccc1[N+])(=O)[O-])C(=O)OCC(C)C                                                             | C20H24N2O6    | 388.41 |                                                                                                                |
| Key<br>Organics/B<br>IONET -<br>BioChemicals Stock                       | ES-0052              | COc1cc2c(ncnc2cc1OCCCN1CCCC1)Oc1ccc2c(c1F)cc([nH]2)C(Cl.Cl.C(CNC(C1=CC=CC=C1)C1=CC=CC=C1)NC(C1=CC=CC=C1)C1=CC=CC=C1 | C25H27FN4O3   | 450.51 | AZD2171, Cediranib                                                                                             |
| Tocris<br>Medchem                                                        | 2385                 |                                                                                                                     | C28H30Cl2N2   | 465.45 | AMN 082 dihydrochloride                                                                                        |
| Express<br>Medchem                                                       | HY-A0063A            | O=c1[nH]c(CN2CCCC2=N)c(c(=O)[nH]1)Cl                                                                                | C9H11ClN4O2   | 242.66 | Tipiracil                                                                                                      |
| Express<br>Selleck<br>Chemicals                                          | HY-13946<br>S1043    | Clc1ccc(cc1)Oc1ccc(cc1)c1nc2c([nH]1)ccc(c2)C(=O)N<br>COc1cc2c(cc1OCCCN1CCCC1)ncnc2N1CCN(CC1)C(=O)Nc1ccc(cc1)OC(C)C  | C20H14ClN3O2  | 363.8  | BML-277                                                                                                        |
| Maybridge<br>Vitas M<br>Labs                                             | GK01981<br>STK832240 | COC(=O)c1scccc1NC(=O)Cc1cccs1<br>Oc1ccc(cc1)/C=N/N(Cc1ccccc1)Cc1ccccc1                                              | C31H42N6O4    | 562.7  | Tandutinib (MLN518)                                                                                            |
| Vitas M<br>Labs                                                          | STL321288            | C(NC(c1ccccc1)c1ccccc1)CNC(c1ccccc1)c1ccccc1                                                                        | C12H11NO3S2   | 281.35 | GK01981                                                                                                        |
| Vitas M<br>Labs                                                          | STK772817            | CCCCn1c(cnc2c1nc1c2c(=O)[nH]c(=O)n1C)c1ccccc1                                                                       | C21H20N2O     | 316.4  | STK832240                                                                                                      |
| Maybridge                                                                | KM03430              | CSc1sc(c2c1C(=O)CC(C2)(C)C)c1cn(n1)C(=O)C                                                                           | C28H28N2      | 392.54 | STL321288                                                                                                      |
| Enamine<br>BB - UA<br>Backorder                                          | EN300-122638         | O=C1CN(C(=O)N1)/N=C/c1ccc(o1)c1ccc(cc1)[N+](=O)[O-]                                                                 | C18H19N5O3    | 353.38 | STK772817                                                                                                      |
| Key<br>Organics/B<br>IONET -<br>Screening<br>and<br>Fragments<br>- Stock | MS-0333              | CCCCOc1ccc(cc1)/C=C/1\SC(=O)NC1=O                                                                                   | C16H18N2O2S2  | 334.46 | KM03430<br>1-({[5-(4-nitrophenyl)furan-2-yl]methylidene)amino}imidazolidine-2,4-dione                          |
| Target<br>Molecule                                                       | T2456                | COc1cc2c(ccnc2cc1OC)Oc1ccc(c(c1)Cl)NC(=O)Nc1noc(c1)C                                                                | C13H13NO3S    | 263.31 | 5-((Z)-(4-propoxyphenyl)methylidene)-1,3-thiazolane-2,4-dione                                                  |
| AbovChem                                                                 | HY-15370A            | CC1CCN(CC1)CC[C@H]1CCCN1S(=O)(=O)c1ccccc1O                                                                          | C22H19ClN4O5  | 454.86 | Tivozanib                                                                                                      |
|                                                                          |                      |                                                                                                                     | C18H28N2O3S   | 352.49 | SB-269970                                                                                                      |



|                                                               |                 |                                                                                                                         |                |         |                                                                               |                                                                            |
|---------------------------------------------------------------|-----------------|-------------------------------------------------------------------------------------------------------------------------|----------------|---------|-------------------------------------------------------------------------------|----------------------------------------------------------------------------|
| Enamine<br>Screening<br>Compound                              |                 |                                                                                                                         |                |         |                                                                               |                                                                            |
| s                                                             | Z274554748      | O=C(N1CCOCC1)Oc1nsnc1N1CCCCC1                                                                                           | C12H18N4O3S    | 298.36  | Z274554748                                                                    |                                                                            |
| Maybridge                                                     | SPB06189        | NC(=N)N/N=C/C/c1ccc(c(c1)Cl)Cl                                                                                          | C8H8Cl2N4      | 231.08  | SPB06189                                                                      |                                                                            |
| Vitas M<br>Labs                                               | STK869906       | Fc1ccccc1c1cc(=O)c2c(n1)sc1c2CCCC1                                                                                      | C16H12FNO2S    | 301.34  | STK869906                                                                     |                                                                            |
| Vitas M<br>Labs                                               | STK235555       | O=C(N1CCCc2c1cccc2)CSc1nc2c(s1)cccc2                                                                                    | C18H16N2OS2    | 340.46  | STK235555                                                                     |                                                                            |
| Vitas M<br>Labs                                               | STK746869       | N#Cc1c(SCC(=O)Nc2nnc(s2)CC)nc(nc1SC)N                                                                                   | C12H13N7OS3    | 367.47  | STK746869                                                                     |                                                                            |
| ChemDiv                                                       | D399-0002       | Clc1ccc(cc1)S(=O)(=O)N1CCCC1c1cccs1                                                                                     | C14H14ClNO2S2  | 327.85  | D399-0002                                                                     |                                                                            |
| Advanced<br>ChemBlock                                         |                 |                                                                                                                         |                |         |                                                                               |                                                                            |
| s - In<br>Stock                                               | R16001          | Cc1[nH]c2c(n1)CCN(c1c2cccc1)C(=O)c1ccc(cc1)NC(=O)c1ccccc1c1ccccc1                                                       | C32H26N4O2     | 498.57  | conivaptan                                                                    |                                                                            |
| Key<br>Organics/B<br>IONET -<br>Screening<br>and<br>Fragments |                 |                                                                                                                         |                |         |                                                                               | 4-[4-(4-chlorophenyl)phenyl]-4-oxo-2-[(phenylsulfanyl)methyl]butanoic acid |
| - Stock                                                       | 12P-030         | OC(=O)C(CC(=O)c1ccc(cc1)c1ccc(cc1)Cl)CSc1ccccc1                                                                         | C23H19ClO3S    | 410.91  |                                                                               |                                                                            |
| AbovChem<br>Bide                                              | HY-15979A       | Brcc1ccc(cc1)/C=C/CNCCNS(=O)(=O)c1cccc2c1ccnc2                                                                          | C20H20BrN3O2S  | 446.36  | H 89                                                                          |                                                                            |
| Pharmatec<br>h                                                | BD262844        | Clc1ccc(cc1)C1=C(CCC(C1)(C)C)CN1CCN(CC1)c1ccc(c(c1)Oc1nc2c(c1)cc[nH]2)C(=O)NS(=O)(=O)c1ccc(c(c1)[N+](=O)[O-])NCC1CCOCC1 | C45H50ClN7O7S  | 868.44  | ABT-199                                                                       |                                                                            |
| ChemDiv                                                       | 6603-0104       | CC(OC(=O)CN1C(=O)C(=O)c2c1c(C)ccc2)C                                                                                    | C14H15NO4      | 261.27  | 6603-0104                                                                     |                                                                            |
| Vitas M<br>Labs                                               | STK155799       | CCCCC(=O)Nc1c(C)cc(cc1C)Br                                                                                              | C14H20BrNO     | 298.22  | STK155799                                                                     |                                                                            |
| Specs                                                         | AG-690/40699390 | ]                                                                                                                       | C24H23N3O4     | 417.46  | AG-690/40699390                                                               |                                                                            |
| ChemDiv                                                       | 0075-0068       | CN1CCN(CC1)c1ccc(cc1)Nc1c2ccccc2nc2c1cccc2                                                                              | C24H24N4       | 368.47  | 0075-0068                                                                     |                                                                            |
| Vitas M<br>Labs                                               | STL336112       | COc1ccccc1N1CCN(CC1)c1ncnc2c1cnn2c1ccccc1                                                                               | C22H22N6O      | 386.45  | STL336112                                                                     |                                                                            |
| MolMall<br>Sarl                                               | 18650           | CN1CCN(CC1)C(=S)SSC(=S)N1CCN(CC1)C                                                                                      | C12H22N4S4     | 350.59  | 18650                                                                         |                                                                            |
| Bide<br>Pharmatec<br>h                                        | BD21816         | Fc1ccc(cc1)[C@@H]1CCNC[C@H]1COc1ccc2c(c1)OCO2                                                                           | C19H20FNO3     | 329.37  | (3S,4R)-3-((Benzo[d][1,3]dioxol-5-ylloxy)methyl)-4-(4-fluorophenyl)piperidine |                                                                            |
| Key<br>Organics/B<br>IONET -<br>Screening<br>and<br>Fragments |                 |                                                                                                                         |                |         |                                                                               |                                                                            |
| - Stock                                                       | AS-2259         | OB(c1ccccc1)O                                                                                                           | C6H7BO2        | 121.93  | Phenylboronic acid                                                            |                                                                            |
| Cayman<br>Chemical                                            | 12097           | CN(c1ccc2c(c1)nn(c2C)C)c1ccnc(n1)Nc1ccc(c(c1)S(=O)(=O)N)C                                                               | C21H23N7O2S    | 437.52  | Pazopanib                                                                     |                                                                            |
| AbovChem<br>Vitas M<br>Labs                                   | HY-10203        | Clc1ccc(cc1)Nc1nnc(c2c1cccc2)Cc1ccncc1                                                                                  | C20H15ClN4     | 346.81  | Vatalanib base                                                                |                                                                            |
| STK416816                                                     |                 | Fc1ccc(cc1)S(=O)(=O)n1c(C)nc2c1cccc2                                                                                    | C14H11FN2O2S   | 290.31  | STK416816                                                                     |                                                                            |
| ChemDiv                                                       | 6030-2123       | COc1ccc(cc1OC)CCNC(=O)CC(c1ccccc1O)C)c1ccccc1                                                                           | C26H29NO4      | 419.51  | 6030-2123                                                                     |                                                                            |
| Vitas M<br>Labs                                               | STL019982       | COC(=O)c1c(NC(=O)CC2SC(=N)NC2=O)sc(c1C)C                                                                                | C13H15N3O4S2   | 341.41  | STL019982                                                                     |                                                                            |
| Vitas M<br>Labs                                               | STK066844       | Clc1ccc(c(c1)C(=O)Nc1ccc(cc1)Cl)NS(=O)(=O)c1ccc(c(c1)[N+](=O)[O-])Cl                                                    | C19H12Cl3N3O5S | 500.74  | STK066844                                                                     |                                                                            |
| Vitas M<br>Labs                                               | STL304557       | CC1(C)OCc2c(C1)c1c(nc2N2CCOCC2)sc2c1ncnc2Nc1cccn1                                                                       | C24H26N6O2S    | 462.57  | STL304557                                                                     |                                                                            |
| ChemDiv                                                       | 0988-0215       | OC(CN1CCOCC1)COc1c(Br)cc(cc1Br)C(c1cc(Br)c(c1)Br)OCC(CN1CCOCC1)O)C)C                                                    | C29H38Br4N2O6  | 830.24  | 0988-0215                                                                     |                                                                            |
| Medchem<br>Express                                            | HY-10052        | O=C1NC(CN2[C@H]([C@@H]([C@@H](O[C@@H](C3=CC(C(F)(F)F)=CC(C(F)(F)F)=C3)C)OCC2)C4=CC=C(F)C=C4)=NN1                        | C23H21F7N4O3   | 534.427 | Aprepitant                                                                    |                                                                            |

|              |               |                                                                                                                                        |                              |         |                            |  |
|--------------|---------------|----------------------------------------------------------------------------------------------------------------------------------------|------------------------------|---------|----------------------------|--|
| TCI          |               |                                                                                                                                        |                              |         |                            |  |
| America      | E1096         | <chem>C#Cc1c[nH]c(=O)[nH]c1=O</chem>                                                                                                   | <chem>C6H4N2O2</chem>        | 136.11  | 5-Ethynyluracil            |  |
| Medchem      |               |                                                                                                                                        |                              |         |                            |  |
| Express      | HY-A0033      | <chem>NC(=O)C(c1ccccc1)(c1ccccc1)[C@@H]1CCN(C1)CCc1ccc2c(c1)CCO2</chem>                                                                | <chem>C28H30N2O2</chem>      | 426.55  | Darifenacin                |  |
| AbovChem     | HY-B0109A     | <chem>CCN[C@H]1C[C@H](C)S(=O)(=O)c2c1cc(s2)S(=O)(=O)N</chem>                                                                           | <chem>C10H16N2O4S3</chem>    | 324.44  | Dorzolamide                |  |
| Enamine      |               |                                                                                                                                        |                              |         |                            |  |
| Screening    |               |                                                                                                                                        |                              |         |                            |  |
| Compound     |               |                                                                                                                                        |                              |         |                            |  |
| s            | Z26397758     | <chem>O=C(c1ccc2c(c1)OCO2)NC1CCCc2c1cccc2</chem>                                                                                       | <chem>C18H17NO3</chem>       | 295.33  | Z26397758                  |  |
| Enamine      |               |                                                                                                                                        |                              |         |                            |  |
| Screening    |               |                                                                                                                                        |                              |         |                            |  |
| Compound     |               |                                                                                                                                        |                              |         |                            |  |
| s            | Z32036776     | <chem>O=C(c1n[nH]c2c1cccc2)Nc1ccc(cc1)N1CCOCC1</chem>                                                                                  | <chem>C18H18N4O2</chem>      | 322.36  | Z32036776                  |  |
| Vitas M      |               |                                                                                                                                        |                              |         |                            |  |
| Labs         | STK410281     | <chem>COc1ccc(cc1)C(=O)Nc1sc(nc1C(=O)N)Nc1ccccc1</chem>                                                                                | <chem>C18H16N4O3S</chem>     | 368.41  | STK410281                  |  |
| ChemDiv      | 4577-1576     | <chem>CCOc1ccc(cc1)S(=O)(=O)N(c1ccccc1)CC(=O)N/N=C/C1C(=O)Nc2c1cccc2</chem>                                                            | <chem>C24H22N4O5S</chem>     | 478.52  | 4577-1576                  |  |
| InterBioScr  |               |                                                                                                                                        |                              |         |                            |  |
| een          | STOCK1N-65052 | <chem>O=C(Nc1cccc(c1)C(=O)C)CN1CCc2c(C1)cc1c(c2)OCCCO1</chem>                                                                          | <chem>C22H24N2O4</chem>      | 380.44  | STOCK1N-65052              |  |
| Vitas M      |               | <chem>Clc1ccc(cc1)COc1ccc(cc1)c1nn(cc1/C=C/1\SC(=S)N(C1=O)CCS(=O)(=O)O)c1ccccc1</chem>                                                 | <chem>C28H22ClN3O5S3</chem>  | 612.14  | STK810090                  |  |
| Labs         | STK810090     | <chem>O=C(N([C@@H](C1=NC2=NC=CC=C2C1N3C=CC=C(OCC)C=C3)=O)C)CC4=CC=CN=C4)CC5=CC=C(O(C(F)(F)F)C=C5</chem>                                | <chem>C32H28F3N5O4</chem>    | 603.591 | AMG 487                    |  |
| Medchem      |               | <chem>COc1cc(ccc1Cc1cn(c2c1cc(cc2)NC(=O)OC1CCCC1)C(=O)NS(=O)(=O)c1ccccc1C</chem>                                                       | <chem>C31H33N3O6S</chem>     | 575.68  | Zafirlukast                |  |
| Express      | HY-15319      |                                                                                                                                        |                              |         |                            |  |
| Cayman       |               |                                                                                                                                        |                              |         |                            |  |
| Chemical     | 10008282      |                                                                                                                                        |                              |         |                            |  |
| AbovChem     | HY-13009      | <chem>OC(=O)C[C@@H]1CC[C@H](CC1)c1ccc(cc1)N1CCOc2c(C1=O)c(N)ncn2</chem>                                                                | <chem>C21H24N4O4</chem>      | 396.44  | PF-04620110                |  |
| AbovChem     | HY-70050C     | <chem>O=C1N(CCc2c1c1ccccc1n2C)Cc1nc[nH]c1C</chem>                                                                                      | <chem>C17H18N4O</chem>       | 294.35  | Alosetron                  |  |
| Enamine      |               |                                                                                                                                        |                              |         |                            |  |
| Screening    |               |                                                                                                                                        |                              |         |                            |  |
| Compound     |               |                                                                                                                                        |                              |         |                            |  |
| s            | Z55729757     | <chem>C1CCn2c(CC1)nnc2C1CC3CC(C2)CC(C1)C3</chem>                                                                                       | <chem>C17H25N3</chem>        | 271.4   | Z55729757                  |  |
| Vitas M      |               |                                                                                                                                        |                              |         |                            |  |
| Labs         | STK841699     | <chem>Oc1ccccc1)NC(=O)c1cc2n(n1)c(C)cc(n2)c1ccccc1</chem>                                                                              | <chem>C20H16N4O2</chem>      | 344.37  | STK841699                  |  |
| ChemDiv      | G748-0054     | <chem>CC(=O)Nc1ccc(cc1)C(=O)Nc1sc(nc1C(=O)N)Nc1ccccc1</chem>                                                                           | <chem>C19H17N5O3S</chem>     | 395.43  | G748-0054                  |  |
| ChemDiv      | D419-2236     | <chem>CCCC(=O)Nc1nc(cc(n1)c1ccccc1)c1ccccc1</chem>                                                                                     | <chem>C20H19N3O</chem>       | 317.38  | D419-2236                  |  |
| Life         |               |                                                                                                                                        |                              |         |                            |  |
| Chemicals    | F0748-0306    | <chem>COc1ccccc1c1nncc(s1)NC(=O)C(SC1=NCCS1)C</chem>                                                                                   | <chem>C15H16N4O2S3</chem>    | 380.51  | F0748-0306                 |  |
| Medchem      |               |                                                                                                                                        |                              |         |                            |  |
| Express      | HY-B0397      | <chem>Clc1cc(cc(c1Cl)S(=O)(=O)N)S(=O)(=O)N</chem>                                                                                      | <chem>C6H6Cl2N2O4S2</chem>   | 305.16  | Dichlorphenamide           |  |
| Medchem      |               | <chem>O=C(C1=CC=C(C(C(OC)=C1)NC2=NC=C(N(C3=O)C)C(N([C@@H]3CC)C(C)C)=N2)N[C@H]4C[C@@H](C4)N5CCN(CC5)CC6CC6</chem>                       | <chem>C34H50N8O3</chem>      | 618.813 | Volasertib                 |  |
| Express      | HY-12137      |                                                                                                                                        |                              |         |                            |  |
| Target       |               |                                                                                                                                        |                              |         |                            |  |
| Molecule     | T1583         | <chem>ONC(=O)CCCCCCC(=O)Nc1ccccc1</chem>                                                                                               | <chem>C14H20N2O3</chem>      | 264.32  | Vorinostat                 |  |
| Target       |               |                                                                                                                                        |                              |         |                            |  |
| Molecule     | T0373         | <chem>COCCOc1cc2c(ncnc2cc1OCCOC)Nc1cccc(c1)C#C</chem>                                                                                  | <chem>C22H23N3O4</chem>      | 393.44  | Erlotinib                  |  |
| Apollo       |               |                                                                                                                                        |                              |         |                            |  |
| Scientific - |               | <chem>CC(C[C@@H]([C@H](CC(=O)N)[C@H](C(=O)N)[C@H]([C@H](CC(=O)O)O)CC(C)C)C)O)NC(=O)[C@H](C(C)C)NC(=O)[C@H](C(C)C)NC(=O)CC(C)C)C</chem> | <chem>C34H63N5O9</chem>      | 685.89  | Pepstatin A                |  |
| Biochemica   |               |                                                                                                                                        |                              |         |                            |  |
| ls - Stock   | BIMI2205      |                                                                                                                                        |                              |         |                            |  |
| Maybridge    | RDR01836      | <chem>Cc1csc(n1)Nc1cccc2c1cccc2</chem>                                                                                                 | <chem>C14H12N2S</chem>       | 240.32  | RDR01836                   |  |
| Vitas M      |               |                                                                                                                                        |                              |         |                            |  |
| Labs         | STK368746     | <chem>CC(COC(=O)N)(c1ccc(cc1)C(C(F)(F)F)(C(F)(F)F)O)C)C</chem>                                                                         | <chem>C15H17F6NO3</chem>     | 373.29  | STK368746                  |  |
| ChemDiv      | K407-0490     | <chem>COc1cc2c(cc1OC)CCN(C2COc1ccc(cc1)O)C(=O)c1ccc(cc1)Cl</chem>                                                                      | <chem>C26H26ClNO5</chem>     | 467.94  | K407-0490                  |  |
| Enamine      |               |                                                                                                                                        |                              |         |                            |  |
| Screening    |               |                                                                                                                                        |                              |         |                            |  |
| Compound     |               |                                                                                                                                        |                              |         |                            |  |
| s            | Z166688522    | <chem>O=C(Nc1cc(C)cc(c1)C)Nc1ccc(cc1)S(=O)(=O)N</chem>                                                                                 | <chem>C15H17N3O3S</chem>     | 319.38  | Z166688522                 |  |
| Maybridge    | S06924        | <chem>COc1ccc(c(c1)c1nc2ccccc2c(=O)o1)Br</chem>                                                                                        | <chem>C15H10BrNO3</chem>     | 332.15  | S06924                     |  |
| AbovChem     | HY-15599      | <chem>COc1c2ccccc2c(c1C)C(=O)c1ccc(c(c1)C(=O)O)N</chem>                                                                                | <chem>C18H16N2O4</chem>      | 324.33  | SSR128129E (free acid)     |  |
| Medchem      |               | <chem>O=C(N(C1CCCC1)CCNCCC2=C(OCC(N3)=O)C3=C(O)C=C2)CCNCCC4=CC=C(Cl)C(Cl)=C4.O=C(O)C(F)(F)F.O=C(O)C(F)(F)F</chem>                      | <chem>C33H40Cl2F6N4O8</chem> | 805.589 | AZ505 (ditrifluoroacetate) |  |
| Express      | HY-15226A     |                                                                                                                                        |                              |         |                            |  |

|           |                 |                                                               |                 |         |                             |  |
|-----------|-----------------|---------------------------------------------------------------|-----------------|---------|-----------------------------|--|
| Cayman    |                 |                                                               |                 |         |                             |  |
| Chemical  | 20389           | CCC(=O)NCC[C@@H]1CCc2c1cCCOc1cc2                              | C16H21NO2       | 259.34  | Ramelteon                   |  |
| Cayman    |                 |                                                               |                 |         |                             |  |
| Chemical  | 11313           | O[C@@H]1[C@@H](O)CN2[C@@H]([C@H]1O)[C@@H](O)CC2               | C8H15NO4        | 189.21  | Castanospermine             |  |
| Bide      |                 |                                                               |                 |         |                             |  |
| Pharmatec |                 |                                                               |                 |         |                             |  |
| h         | BD123889        | O=C1NC(=O)CN(C1)C[C@@H](N1CC(=O)NC(=O)C1)C                    | C11H16N4O4      | 268.27  | Dexrazoxane                 |  |
| Maybridge | RH00511         | CCCCc1ccc(c(c1)C)N/C=N/O                                      | C12H18N2O       | 206.28  | RH00511                     |  |
| Specs     | AQ-390/43364023 | CCn1c2ccc(c3c2c(c1=O)ccc3)S(=O)(=O)Nc1cccc(c1)C(=O)C          | C21H18N2O4S     | 394.44  | AQ-390/43364023             |  |
| ChemDiv   | K788-2368       | Fc1ccc(cc1)S(=O)(=O)NCc1ccc(cc1)C(=O)NCc1ccncc1               | C20H18FN3O3S    | 399.44  | K788-2368                   |  |
| Enamine   |                 |                                                               |                 |         |                             |  |
| Screening |                 |                                                               |                 |         |                             |  |
| Compound  |                 |                                                               |                 |         |                             |  |
| s         | Z26426477       | O=C(C1CC(=O)N(C1)Cc1ccccc1)NCc1ccc(cc1)Cl                     | C19H18Cl2N2O2   | 377.26  | Z26426477                   |  |
| Maybridge | JFD01049        | N#CCOC(=O)Cc1ccc(cc1)c1cc(=O)c2c(o1)cccc2                     | C18H11NO4       | 305.28  | JFD01049                    |  |
| Medchem   |                 |                                                               |                 |         |                             |  |
| Express   | HY-10122        | OCCCN1CCc2c1c(cc(c2)C[C@H](NCCOc1ccccc1OCC(F)(F)F)C)C(=O)N    | C25H32F3N3O4    | 495.53  | Silodosin                   |  |
| Medchem   |                 |                                                               |                 |         |                             |  |
| Express   | HY-12828        | O=C(C(N1C)=C(/C(C#N)=C1N)C2=C1C(Cl)=C(Cl)C=C2)OCC             | C15H13Cl2N3O2   | 338.189 | KH-CB19                     |  |
| Medchem   |                 | N#CC1=NN(C2=CC(Cl)=C(O)C(C=C3C(C)C)=NNC3=O)C(Cl)=C2)C(NC1=O   |                 |         |                             |  |
| Express   | HY-12216        | )=O                                                           | C17H12Cl2N6O4   | 435.221 | MGL-3196                    |  |
| Medchem   |                 | O=C([C@H]1CC[C@]2([H])[C@]1(C)CC[C@]3([H])[C@@]4(C)C=CC(N[C   |                 |         |                             |  |
| Express   | HY-13635        | @]4([H])CC[C@]32[H])=O)NC(C)(C)C                              | C23H36N2O2      | 372.544 | Finasteride                 |  |
| Medchem   |                 | O=C1NN=C2C3=C1C=C(F)C=C3N[C@H](C4=CC=C(F)C=C4)[C@H]2C5=       |                 |         |                             |  |
| Express   | HY-16106        | NC=NN5C                                                       | C19H14F2N6O     | 380.351 | BMN-673                     |  |
| Medchem   |                 | FC1([C@H]2[C@@H]1C3=C([C@@H](C4=CC=CC=C4)N5CCN(CC5)C[C        |                 |         |                             |  |
| Express   | HY-50671        | @H](CO)C6=C7C=CC=NC7=CC=C6)O)C=CC=C3)F.Cl.Cl.Cl               | C32H34Cl3F2N3O2 | 636.987 | (trihydrochloride)          |  |
| Medchem   |                 | O=C1N(CC2=C(N1)C=CC=C2)C3CCN(C(N[C@@H](C(N[C@@H](C(N4CCN(     |                 |         |                             |  |
| Express   | HY-10095        | C5=CC=NC=C5)CC4=O)CCCCN(=O)CC6=CC(Br)=C(C(Br)=C6)O)=O)CC      | C38H47Br2N9O5   | 869.645 | Olcegepant                  |  |
| Medchem   |                 | OC1=C(O)[C@H]2C3=O)C([C@]2(C)[C@N@+](4(C)CC5CC5)[C@](CC3)(O)  |                 |         |                             |  |
| Express   | HY-75766        | [C@H]4C6)=C6C=C1.[Br-]                                        | C21H26BrNO4     | 436.339 | Methylnaltrexone (Bromide)  |  |
| Medchem   |                 | O=S(C1=CC(F)=CC2=C1N(C3=C2CC[C@H]3CC(O)=O)CC4=CC=C(Cl)        |                 |         |                             |  |
| Express   | HY-50175        | C=C4)(C)=O                                                    | C21H19ClFNO4S   | 435.896 | Laropiprant                 |  |
| Medchem   |                 | NC([C@H](CC1=CC=CC=C1)NC([C@H](CCCNC(N)=N)NC(C23C[C@H](C4     |                 |         |                             |  |
| Express   | HY-107382       | )C[C@H](C[C@H]4C3)C2=O)=O)=O                                  | C26H38N6O3      | 482.618 | RF9                         |  |
| Medchem   |                 |                                                               |                 |         |                             |  |
| Express   | HY-108316       | O=S(C1=CC=C(N(CCC2)S2=O)=O)C=C1)(N)=O                         | C10H14N2O4S2    | 290.359 | Sultiame                    |  |
| Medchem   |                 | CC(C)(C)C1=CC(SC(C)(C)SC2=CC(C(C)(C)C)=C(O)C(CCC(C)=O)=O)C(C( |                 |         |                             |  |
| Express   | HY-14937        | C)(C)C)=C2=CC(C(C)(C)C)=C1O                                   | C35H52O5S2      | 616.914 | Succinobucol                |  |
| Medchem   |                 |                                                               |                 |         |                             |  |
| Express   | HY-16276        | N#CC1=CC=C([C@H]2CCC3=CN=CN32)C(F)=C1                         | C13H10FN3       | 227.237 | Osilodrostat                |  |
| Medchem   |                 | O=C(CC)O[C@@]([C@]([C@@]1([H])C2(C)C@H(O)[C@](F)([C@]3C=      |                 |         |                             |  |
| Express   | HY-B0154        | C4)C)[C@@]1([H])C[C@H](F)C3=CC4=O)C([C@H]2C)C(SCF)=O          | C25H31F3O5S     | 500.571 | Fluticasone (propionate)    |  |
| Medchem   |                 | CC1=CN=CC2=C1C(S(=O)N3[C@@H](C)CNC3C3)=O)=CC=C2.[H]Cl.[H]     |                 |         |                             |  |
| Express   | HY-15720A       | Cl                                                            | C16H23Cl2N3O2S  | 392.344 | H-1152 (dihydrochloride)    |  |
| Medchem   |                 | O=C1[C@@H](C)[C@]2(O)[C@]3(C4=O)C(C5([C@@H](O)C(O6)=O)C       |                 |         |                             |  |
| Express   | HY-B0355        | 6O3)([C@H](O4)C[C@H]5C(C)(C)C[C@]2([H])O1                     | C20H24O9        | 408.399 | Ginkgolide A                |  |
| Medchem   |                 | CO)C1=C(O)C=C(CCO[C@H]2[C@H](N3CC[C@H](O)C3)CCCC2)C=C         |                 |         |                             |  |
| Express   | HY-14183        | 1.Cl                                                          | C20H32ClNO4     | 385.925 | Vernakalant (Hydrochloride) |  |
| Medchem   |                 | NC1CCN(C2=C3N=C(C=CC3=CC=C2)N4C=NC5=CC(OCCO)C=CC=C54)C        |                 |         |                             |  |
| Express   | HY-12050        | C1                                                            | C24H27N5O2      | 417.504 | CP-673451                   |  |
| Medchem   |                 | O=S(CCC1=CC2=C(NC=C2C[C@H]3N(CCC3)C)C=C1)(C4=CC=CC=C4)        |                 |         |                             |  |
| Express   | HY-A0010        | =O.Br                                                         | C22H27BrN2O2S   | 463.431 | Eletriptan (hydrobromide)   |  |
| Medchem   |                 |                                                               |                 |         |                             |  |
| Express   | HY-107377       | C12=C(C=C3)C=C(C=CC=C4)C4=C1C=CC5=CC=CC3=C25                  | C20H12          | 252.309 | Benzo[a]pyrene              |  |
| Medchem   |                 | O=C(NC(C)(C)C)[C@@H](NC([C@H](CC(C)C)N)CC1=CC=C(C(C)(C)C)     |                 |         |                             |  |
| Express   | HY-103318       | C=C1)=O)CC2=CC=C(OCC3=CC=CC=C3)C=C2                           | C38H53N3O3      | 599.846 | PD173212                    |  |
| Medchem   |                 | C[C@@]12[C@](C(CO)C(=O)=O)(O)CC[C@]1([H])[C@]3([H])CCC4=      |                 |         |                             |  |
| Express   | HY-B1383        | CC(C=C[C@]4(C)[C@]3(C)[C@@H](Cl)C2)=O                         | C23H28Cl2O5     | 455.371 | Dichlorisone acetate        |  |
| Medchem   |                 |                                                               |                 |         |                             |  |
| Express   | HY-14929A       | O[C@H]1[C@H](CO)NC[C@H](O)[C@H]1O.Cl                          | C6H14ClNO4      | 199.633 | Migalastat (hydrochloride)  |  |
| Medchem   |                 | O=C(NCC(N[C@H](C(N[C@H](CC1=CC=CC=C1)C(N([C@H]2C(C)C)C)=O     |                 |         |                             |  |
| Express   | HY-16141        | )=O)CC(O)=O)[C@H](CCCNC(N)=N)NC2=O                            | C27H40N8O7      | 588.656 | Cilengitide                 |  |
| Medchem   |                 | NC1=NC=NC2=C1C(Br)=CN2[C@H]3[C@H](O)[C@H](O)[C@@H](CN(CC      |                 |         |                             |  |
| Express   | HY-15650        | CNC(NC4=CC=C(C(C)(C)C)C=C4)=O)C(C)CO3                         | C28H40BrN7O4    | 618.566 | SGC0946                     |  |
| Medchem   |                 |                                                               |                 |         |                             |  |
| Express   | HY-15449        | O=C1C(O)=C(C2=CC=C(O)C)C=C2)OC3=CC(O)=CC(O)=C13               | C16H12O6        | 300.263 | Kaempferide                 |  |

|         |           |                                                                                                                                                                                                                                                                             |                             |          |                          |
|---------|-----------|-----------------------------------------------------------------------------------------------------------------------------------------------------------------------------------------------------------------------------------------------------------------------------|-----------------------------|----------|--------------------------|
| Medchem |           | <chem>C1C1=CC(C2=CC=C(N=CC(C(C)=O)=C3N[C@H]4CC[C@H](CN(C)C)CC4)C3=N2)=CC(CI)=C1O.[H]Cl</chem>                                                                                                                                                                               |                             |          | OTSSP167                 |
| Express | HY-15512A |                                                                                                                                                                                                                                                                             | <chem>C25H29Cl3N4O2</chem>  | 523.882  | (hydrochloride)          |
| Medchem |           |                                                                                                                                                                                                                                                                             |                             |          |                          |
| Express | HY-50855  | <chem>O=C(C1=CC=C2C3=C(C(NC4=CC=CC(CI)=C4)=NC2=C1)C=CN=C3)O</chem>                                                                                                                                                                                                          | <chem>C19H12ClN3O2</chem>   | 349.771  | CX-4945                  |
| Medchem |           | <chem>O=C1C2=C(C(C=C(C([C@]3([H])[C@H](O)CN(C)CC3)=C2O)C(C4=CC=CC=C4C)=C1)O)O</chem>                                                                                                                                                                                        | <chem>C21H20ClNO5</chem>    | 401.84   | Flavopiridol             |
| Express | HY-10005  |                                                                                                                                                                                                                                                                             |                             |          |                          |
| Medchem |           | <chem>N[C@@H](CCCCNC(C)=N)C(O)=O</chem>                                                                                                                                                                                                                                     | <chem>C8H17N3O2</chem>      | 187.24   | L-NIL                    |
| Express | HY-12116  |                                                                                                                                                                                                                                                                             |                             |          | Phenethylamine, 2,6-     |
| Medchem |           | <chem>NCCC1=C(C=C=C1Cl)Cl</chem>                                                                                                                                                                                                                                            | <chem>C8H9Cl2N</chem>       | 190.07   | dichloro-                |
| Express | HY-107374 |                                                                                                                                                                                                                                                                             |                             |          |                          |
| Medchem |           | <chem>O=C([C@@H](N)C(C)C)N[C@H](C(O)=O)CC1=CC=CC=C1</chem>                                                                                                                                                                                                                  | <chem>C14H20N2O3</chem>     | 264.32   | L-Valyl-L-phenylalanine  |
| Express | HY-107378 | <chem>C[C@@]12[C@@](C#CC)(O)CC[C@@]1([H])[C@]3([H])CCC4=CC(CCC4=C3[C@@H](C5=CC=C(N(C)C)C=C5)C2)=O</chem>                                                                                                                                                                    | <chem>C29H35NO2</chem>      | 429.594  | Mifepristone             |
| Medchem | HY-13683  | <chem>C1(C2=CC=CC(OCCN3CCCCC3)=C2)=NNC4=C1C=C(C=C4)C5=NC=NN5</chem>                                                                                                                                                                                                         | <chem>C22H25ClN6O</chem>    | 424.927  | CC-401 (hydrochloride)   |
| Express | HY-13022  | <chem>Cl</chem>                                                                                                                                                                                                                                                             |                             |          |                          |
| Medchem |           | <chem>CC(C(C)[C@H](NCC1=CC=NC=C1)C(N2CC3=C(C=C(O)C(O)C=C3)CC2)=O</chem>                                                                                                                                                                                                     | <chem>C23H31N3O3</chem>     | 397.511  | TCS-OX2-29               |
| Express | HY-100452 |                                                                                                                                                                                                                                                                             |                             |          |                          |
| Medchem |           | <chem>OC1=CC=C(C(C(C)=C(C)C)/C2=CC=C(O)C=C2)C=C1</chem>                                                                                                                                                                                                                     | <chem>C18H20O2</chem>       | 268.35   | Diethylstilbestrol       |
| Express | HY-14598  |                                                                                                                                                                                                                                                                             |                             |          | Dapiprazole              |
| Medchem |           | <chem>CC1=CC=CC=C1N2CCN(CCC3=NN=C4CCCCN43)CC2.[H]Cl</chem>                                                                                                                                                                                                                  | <chem>C19H28ClN5</chem>     | 361.912  | (hydrochloride)          |
| Express | HY-A0142A | <chem>O[C@@H]1[C@H](C)[C@]2([H])CC[C@H](C)[C@]3([H])CC[C@@](O4)(C)O[C@]32[C@]4([H])O1</chem>                                                                                                                                                                                | <chem>C15H24O5</chem>       | 284.348  | Dihydroartemisinin       |
| Medchem | HY-N0176  |                                                                                                                                                                                                                                                                             |                             |          | Roxatidine (Acetate      |
| Express | HY-B0305A | <chem>O=C(NCCCOC1=CC=CC(CN2CCCCC2)=C1)CO(C)C=O.Cl</chem>                                                                                                                                                                                                                    | <chem>C19H29ClN2O4</chem>   | 384.898  | Hydrochloride)           |
| Medchem |           | <chem>O=C(NCC(N[C@H]1CN(CC2=CC=C(CI)C=C2)CC1)=O)C3=CC=CC(C(F)(F)F)=C3</chem>                                                                                                                                                                                                | <chem>C21H21ClF3N3O2</chem> | 439.859  | Teijin compound 1        |
| Express | HY-108323 | <chem>O[C@@H]1[C@H]([C@H]([C@H](N2C=NC3=C2N=C(N)N=C3SCC4=CC=C([N+])([O-])=O)C=C4)O1)O)O</chem>                                                                                                                                                                              | <chem>C17H18N6O6S</chem>    | 434.426  | NBTGR                    |
| Medchem | HY-108322 | <chem>O=C(NC1=CC=C(N(C)[C@H](C(C)C)C(N[C@H](CO)C2=O)C2=C1)/C=C(C)C3=CC=C(C(F)(F)F)C=C3</chem>                                                                                                                                                                               | <chem>C27H30F3N3O3</chem>   | 501.541  | TPPB                     |
| Express | HY-12359  | <chem>O=C(N(CCC1=CC=CC=C1O)C[C@H]2CNCC2)C3=CC=C(CN(CC)CC)C=C3.[H]Cl.[H]Cl</chem>                                                                                                                                                                                            | <chem>C25H37Cl2N3O2</chem>  | 482.486  | PF429242                 |
| Medchem | HY-13447A |                                                                                                                                                                                                                                                                             |                             |          | (dihydrochloride)        |
| Express | HY-B0741A | <chem>O=C(N1CCN(C)CC1)O[C@@H]2N(C3=NC=C(CI)C=C3)C(C4=NC=CN=C42)=O</chem>                                                                                                                                                                                                    | <chem>C17H17ClN6O3</chem>   | 388.808  | Zopiclone (S-enantiomer) |
| Medchem |           | <chem>F C1=C(CN2CCOCC2)C(F)=CC(C3=C4N=C(C5=CN(C6CCNCC6)N=C5)C=NC4=CC=C3)=C1.Cl.Cl</chem>                                                                                                                                                                                    | <chem>C27H30Cl2F2N6O</chem> | 563.47   | NVP-BSK805               |
| Express | HY-14722A |                                                                                                                                                                                                                                                                             |                             |          | (dihydrochloride)        |
| Medchem |           | <chem>O=C(O)CC1=CC=C(C(C2=C1)OCC3=CC=CC=C3CC2=C(CCN(C)C.Cl</chem>                                                                                                                                                                                                           | <chem>C21H24ClNO3</chem>    | 373.873  | Olopatadine              |
| Express | HY-B0426A | <chem>N[C@@H](C1)CCCN1[C@@H]2CC3=CC=CC=C3[C@H]2O C4=C(CI)C=C(C#N)C=C4</chem>                                                                                                                                                                                                | <chem>C21H22ClN3O</chem>    | 367.872  | (hydrochloride)          |
| Medchem | HY-15699  | <chem>O=C(N)C1=CC=CC=C1NC2=NC(C3=CC=C(C(O)C=C3)OC)=CC4=NC=CN</chem>                                                                                                                                                                                                         | <chem>C20H20Cl2N6O3</chem>  | 463.317  | SAR7334                  |
| Express | HY-14985  | <chem>24.[H]Cl.[H]Cl</chem>                                                                                                                                                                                                                                                 |                             |          | BAY 61-3606              |
| Medchem |           | <chem>[H]Cl.[H]Cl.NCCCCN(CC1=NC2=CC=CC=C2N1)[C@@H]3C4=NC=CC=C4CCC3.[H]Cl</chem>                                                                                                                                                                                             | <chem>C21H30Cl3N5</chem>    | 458.855  | (dihydrochloride)        |
| Express | HY-50101A | <chem>O=C([C@@H](N1)CCC1=O)C[C@@H](CCCCN(C)=N)C(N2[C@H](CCC2)(N[C@H](CCNC(N)=N)C(N[C@H](CC(C)C)C(N[C@H](CO)C(N[C@H](C(N[C@H](CCCCN)C(NCC(N3[C@@H](CCC3)C(N[C@H](CCS)C(C)N4[C@H](CCC4)C(N[C@H](C(O)=O)CC5=CC=CC=C5)=O)=O)=O)=O)=O)CC6=CNC=N6)=O)=O)=O</chem>                 | <chem>C70H109N21O16S</chem> | 1532.811 | AMD-070 (hydrochloride)  |
| Medchem | HY-P1033  | <chem>O=C(N[C@H](C)C(N[C@H](C(C)C)C(NCC(N[C@H](C(N[C@H](CC(C)C)C(N[C@H](C(N)=O)CCSC)=O)=O)CC1=CN=CN1)=O)=O)[C@@H](NC([C@H](CCC(N)=O)NC([C@H](CC(N)=O)NC(CNC([C@H](CC(C)C)N C([C@H](CCCNC(N)=N)NC([C@H](CCC(N)=O)NC([C@H](N2)CCC2=O)=O)=O)=O)=O)=O)CC3=CNC4=CC=CC=C34</chem> | <chem>C71H110N24O18S</chem> | 1619.848 | [Pyr1]-Apelin-13         |
| Express | HY-P0195  |                                                                                                                                                                                                                                                                             |                             |          | Bombesin                 |
| Medchem |           |                                                                                                                                                                                                                                                                             |                             |          |                          |
| Express | HY-N1394  | <chem>O=C(O)C1=CC=C(C(O)C)C=C1</chem>                                                                                                                                                                                                                                       | <chem>C8H8O3</chem>         | 152.147  | 4-Methoxybenzoic acid    |
| Medchem |           | <chem>C[C@H](CCC(O)=O)[C@H]1CC[C@]2([H])[C@]3([H])[C@@H](O)C[C@]4([H])C[C@H](O)CC[C@]4(C)[C@]3([H])CC[C@]12C</chem>                                                                                                                                                         | <chem>C24H40O4</chem>       | 392.572  | UAMC00039                |
| Express | HY-13771  |                                                                                                                                                                                                                                                                             |                             |          | (dihydrochloride)        |
| Medchem |           | <chem>O=C(N1CCCCC1)[C@@H](N)CCNCC2=CC=C(CI)C=C2.[H]Cl.[H]Cl</chem>                                                                                                                                                                                                          | <chem>C16H26Cl3N3O</chem>   | 382.756  | Olaparib                 |
| Express | HY-101769 | <chem>O=C(C1=CC(C2=CC(C3=CC=C2)=NNC3=O)=CC=C1F)N4CCN(C(C5CC5)=O)CC4</chem>                                                                                                                                                                                                  | <chem>C24H23FN4O3</chem>    | 434.463  | N6022                    |
| Medchem | HY-10162  | <chem>OC(CCC1=CC=C(N1C2=CC=C(C(N)=O)C=C2)C(C=C3)=CC=C3N4C=CN=C4)=O</chem>                                                                                                                                                                                                   | <chem>C24H22N4O3</chem>     | 414.457  | Olodaterol               |
| Express | HY-14984  | <chem>O=C1NC2=CC(O)=CC([C@@H](O)CNC(C)(C)CC3=CC=C(C(O)C=C3)=C2</chem>                                                                                                                                                                                                       | <chem>C21H26N2O5</chem>     | 386.442  |                          |
| Medchem | HY-14301  | <chem>OC1</chem>                                                                                                                                                                                                                                                            |                             |          |                          |

|         |           |                                                                                                              |                |          |                           |
|---------|-----------|--------------------------------------------------------------------------------------------------------------|----------------|----------|---------------------------|
| Medchem |           | <chem>O=C(CC1)O[C@@]21CC[C@@]3([H])[C@]4([H])[C@H](C(OC)=O)CC5=</chem>                                       |                |          |                           |
| Express | HY-B0251  | <chem>CC(C[C@]5(C)[C@@]46[C@H](O6)C[C@@]32C)=O</chem>                                                        | C24H30O6       | 414.491  | Eplerenone                |
| Medchem |           | <chem>C[C@]1([C@]([C@H](C)/C=C/[C@H](C)C(C)O)([H])CC1)(CC(2)[C@]1([H])C2=C1C=C3C[C@@H](O)C[C@H](O)C/3</chem> | C27H44O3       | 416.637  | Paricalcitol              |
| Express | HY-50919  | <chem>O(C(CO C1=CC=CC2=C1C[C@]([C@@H](O)[C@@H]3CC[C@@H](O)C</chem>                                           |                |          |                           |
| Medchem | HY-100441 | <chem>CCCC)([H])[C@]3([H])C2)=O</chem>                                                                       | C23H34O5       | 390.513  | Treprostinil              |
| Express | HY-108313 | <chem>CC1=NC2=C(C3=CC=C(C(OC)C(OC)=C3)C(C)=NN2C(NCCN4CCOCC4)=C1</chem>                                       | C22H29N5O3     | 411.497  | T-00127_HEV1              |
| Medchem |           |                                                                                                              |                |          |                           |
| Express | HY-A0070A | <chem>OC1=C(I)C=C(OC2=C(I)C=C(C[C@H](N)C(O)=O)C=C2)C=C1</chem>                                               | C15H12I3NO4    | 650.974  | 3,3',5-Triodo-L-thyronine |
| Medchem |           | <chem>O=C1NC(C(C2=CN(C3=CC=CC=C3)CCO[C@H](CN(C)C)CC4)=C1C5=C</chem>                                          |                |          | Ruboxistaurin             |
| Express | HY-10195B | <chem>N4C6=CC=CC=C56)=O.[H]Cl</chem>                                                                         | C28H29ClN4O3   | 505.008  | (hydrochloride)           |
| Medchem |           | <chem>3N(C([C@H](CO)NC([C@H](CC4=CC=CS4)NC(CNC([C@@H]5C[C@@H](</chem>                                        |                |          |                           |
| Express | HY-17446  | <chem>O)CN5C([C@H]6N(C([C@H](CCCNC(N)=N)NC([C@H](N)CCCNC(N)=N)=</chem>                                       |                |          |                           |
| Medchem |           | <chem>O)=O)CC6)=O)=O)=O)=O)CC7=C(C=CC=C7)C3)=O)[C@]2([H])CC</chem>                                           | C59H89N19O13S  | 1304.522 | Icatibant                 |
| Express | HY-12588  | <chem>CC1</chem>                                                                                             |                |          |                           |
| Medchem |           |                                                                                                              |                |          |                           |
| Express | HY-50759  | <chem>O[C@H]1[C@H](O)[C@@]2([H])N=C(NCC)S[C@@]2([H])O[C@@H]1CO</chem>                                        | C9H16N2O4S     | 248.299  | Thiamet G                 |
| Medchem |           | <chem>O=C1N(CC2=CC=CC=C2)C([C@@H](C(C)N(CCCN)C(C3=CC=C(C)C=C</chem>                                          |                |          |                           |
| Express | HY-10969  | <chem>3)=O)=NC4=CC(CI)=CC=C14</chem>                                                                         | C30H33ClN4O2   | 517.062  | Ispinesib                 |
| Medchem |           | <chem>COC1=CC(C2=CC3=C(C=CC=C3)N2)=N/C1=C1C4=C(C=C(N4)C)C.CS(=</chem>                                        |                |          |                           |
| Express | HY-B0600  | <chem>O)(O)=O</chem>                                                                                         | C21H23N3O4S    | 413.49   | Obatoclox                 |
| Medchem |           | <chem>O=C(O(C(C)CCC/C=C1C[C@@H]1[C@H](/C=C/C(F)(F)COC2=CC=C</chem>                                           |                |          |                           |
| Express | HY-B1480  | <chem>C=C2)[C@H](O)C[C@@H]1O</chem>                                                                          | C25H34F2O5     | 452.531  | Tafuprost                 |
| Medchem |           |                                                                                                              |                |          |                           |
| Express | HY-13755  | <chem>O=S(C1=NC2=CC=C(C(OC)C=C2S1)(N)=O</chem>                                                               | C9H10N2O3S2    | 258.317  | Ethoxzolamide             |
| Medchem |           |                                                                                                              |                |          |                           |
| Express |           | <chem>O=S(CCCCN=C=S)C</chem>                                                                                 | C6H11NOS2      | 177.288  | Sulforaphane              |
| Medchem |           | <chem>O=C(N[C@@H](C(C)C)C(NCC(N[C@@H](CC(C)C)C(N[C@H](C(N)=O)CC</chem>                                       |                |          |                           |
| Express | HY-P0197  | <chem>SC)=O)=O)=O)[C@@H](NC([C@H](CO)NC([C@H](CC(O)=O)NC([C@@</chem>                                         |                |          |                           |
| Medchem |           | <chem>])([C@H](O(C)[H])NC([C@H](CCCCN)NC([C@H](N)CC1=CN=CN1)=O)</chem>                                       |                |          |                           |
| Express | HY-18077  | <chem>=O)=O)=O)=O)CC2=CC=CC=C2</chem>                                                                        | C50H80N14O14S  | 1133.321 | Neurokinin A              |
| Medchem |           |                                                                                                              |                |          |                           |
| Express | HY-13004  | <chem>COC1=CC2=C(C=C1O)C=C(CN=C2CC3=CC=C(C(OC)C(OC)=C3</chem>                                                | C20H21NO4      | 339.385  | Papaverine                |
| Medchem |           | <chem>O=C(C1CCC(F)(F)CC1)N[C@H](C2=CC=CC=C2)CCN3[C@H]4C[C@@H](</chem>                                        |                |          |                           |
| Express | HY-15872A | <chem>N5(C)=NN=C5(C)C[C@@H]3CC4</chem>                                                                       | C29H41F2N5O    | 513.666  | Maraviroc                 |
| Medchem |           | <chem>CSCC[C@@H](C(OC)=O)NC(C1=CC=C(C(NC[C@@H](N)CS)C=C1C2=CC=</chem>                                        |                |          |                           |
| Express | HY-14127  | <chem>CC=C2)=O.[H]Cl</chem>                                                                                  | C22H30ClN3O3S2 | 484.075  | FTI-277 (hydrochloride)   |
| Medchem |           |                                                                                                              |                |          |                           |
| Express | HY-15292  | <chem>CCCN(C1=CC(C)=NC2=C(C3=CN=C(N(C)C)C=C3C)C(C)=NN21)CCC</chem>                                           | C22H32N6       | 380.53   | R121919                   |
| Medchem |           |                                                                                                              |                |          |                           |
| Express | HY-17412  | <chem>COC1=CC=C2C(CN(C)CCS2)=C1</chem>                                                                       | C11H15NOS      | 209.308  | S107                      |
| Medchem |           | <chem>OC1=C(C(N)=O)C([C@@]2(O)C(O)=C3C(C4=C(O)C=CC(N(C)C)=C4C[C</chem>                                       |                |          | Minocycline               |
| Express | HY-14992  | <chem>@]3([H])C[C@@]2([H])[C@@H]1N(C)=O)=O.Cl</chem>                                                         | C23H28ClN3O7   | 493.937  | (hydrochloride)           |
| Medchem |           | <chem>O=C1N=C(CN2C1=C(N=C2[C@H])(CCCC3=CC=CC=C3)[C@@H](C(O)</chem>                                           |                |          |                           |
| Express | HY-P0224  | <chem>C)CC4=CC=C(C(OC)=C4)OC</chem>                                                                          | C27H32N4O4     | 476.567  | Bay 60-7550               |
| Medchem |           | <chem>O=C(O)[C@H](CC1=CC=CC=C1)NC([C@H](CC(C)C)NC([C@H](CCSC)N</chem>                                        |                |          |                           |
| Express | HY-B1334A | <chem>C=O)=O)=O</chem>                                                                                       | C21H31N3O5S    | 437.553  | N-Formyl-Met-Leu-Phe      |
| Medchem |           |                                                                                                              |                |          |                           |
| Express | HY-108321 | <chem>O=C(O)/C=C1C(O)=O.C1(CC(C2CCCC2)C3CCCC3)NCCCC1</chem>                                                  | C23H39NO4      | 393.56   | Perhexiline maleate       |
| Medchem |           | <chem>O=C(O)[C@H]1N(C([C@H](C)CS(C2=CC=CC=C2)=O)=O)C[C@@H](S</chem>                                          |                |          |                           |
| Express | HY-107372 | <chem>C3=CC=CC=C3)C1</chem>                                                                                  | C22H23NO4S2    | 429.552  | Zofenopril                |
| Medchem |           | <chem>O[C@H]1[C@H](N2C(NC(C2)=O)=O)O[C@H](COP(OP(OP(O)=O)=O)</chem>                                          |                |          |                           |
| Express | HY-B0374  | <chem>(O)=O)(O)=O)[C@H]1O</chem>                                                                             | C9H15N2O15P3   | 484.141  | Uridine triphosphate      |
| Medchem |           |                                                                                                              |                |          |                           |
| Express | HY-10234  | <chem>CC1=NC(OC)=C(NC2=NCCN2)C(CI)=N1</chem>                                                                 | C9H12ClN5O     | 241.678  | Moxonidine                |
| Medchem |           | <chem>Cl(C1=CC=C2C(OCO2)=C1NC3=C4C(OC5CCOCC5)=CC(OCN6CCN(C)C</chem>                                          |                |          |                           |
| Express | HY-17368  | <chem>C6)=CC4=NC=N3</chem>                                                                                   | C27H32ClN5O5   | 542.027  | Saracatinib               |
| Medchem |           |                                                                                                              |                |          |                           |
| Express | HY-13803  | <chem>O=C(N(C)CC)OC1=CC=CC([C@H](C)N(C)C)=C1</chem>                                                          | C14H22N2O2     | 250.337  | Rivastigmine              |
| Medchem |           | <chem>O=C(C1=CC(C2=CC=C(CN3CCOCC3)C=C2)=CC(N(C)C)C4CCOCC4)=C1C</chem>                                        |                |          |                           |
| Express | HY-15656  | <chem>)NCC5=C(C)C=C(C)NC5=O</chem>                                                                           | C34H44N4O4     | 572.738  | EPZ-6438                  |
| Medchem |           | <chem>CC(C)OC1=CC(C2CCNCC2)=C(C)C=C1NC3=NC=C(CI)C(NC4=CC=CC=C4</chem>                                        |                |          |                           |
| Express | HY-B0180  | <chem>S(=O)(C(C)C)=O)=N3</chem>                                                                              | C28H36ClN5O3S  | 558.135  | LDK378                    |
| Medchem |           |                                                                                                              |                |          |                           |
| Express | HY-17040  | <chem>NC1=NC2=CC=CC=C2C3=C1N=CN3CC(C)C</chem>                                                                | C14H16N4       | 240.304  | Imiquimod                 |
| Medchem |           | <chem>O=C(O[C@@H]1[C@@]2([H])[C@@]([OCC2]([H])OC1)N[C@@H](CC3=C</chem>                                       |                |          |                           |
| Express |           | <chem>C=CC=C3)[C@H](O)CN(S(=O)(C4=CC=C(N)C=C4)=O)CC(C)C</chem>                                               | C27H37N3O7S    | 547.664  | Darunavir                 |

|         |           |                                                                                                       |                |         |                           |
|---------|-----------|-------------------------------------------------------------------------------------------------------|----------------|---------|---------------------------|
| Medchem |           |                                                                                                       |                |         |                           |
| Express | HY-13677  | S=C1NC=NC2=C1NC=N2                                                                                    | C5H4N4S        | 152.177 | 6-Mercaptopurine          |
| Medchem |           | O=C(C1=C(C(=O)C=C(NC(C2=CC(F)=CC=C2C)=O)C=C1)N(C3)C4=CC=CC=C4CN5C3=CC=C5                              | C27H21ClFN3O2  | 473.926 | Lixivaptan                |
| Express | HY-14185  | O=C1[C@@H](N(C2=C(N1C)C=NC(NC3=CC=C(C(NC4CCN(C)CC4)=O)C=C3O)C=N2)C5CCCC5)CC                           | C28H39N7O3     | 521.654 | BI 2536                   |
| Medchem |           |                                                                                                       |                |         | Pramipexole               |
| Express | HY-17355  | NC(S1)=NC2=C1C[C@@H](NCCC)CC2.[H]Cl.[H]Cl                                                             | C10H19Cl2N3S   | 284.249 | (dihydrochloride)         |
| Medchem |           |                                                                                                       |                |         |                           |
| Express | HY-12787  | OC1=CC(C2=C(C3=CC=NC=C3)N=C(C4=CC=CC=C4)N2)=CC=C1Cl                                                   | C20H14ClN3O    | 347.798 | L-779450                  |
| Medchem |           | O=C(C1=CC2=C(N(C)C=N3)C3=C(C(NC4=NN(C)C(C)=C4)N=C2N1CC)N(C5CC5)C6CC6                                  | C23H28N8O      | 432.521 | BMS-911543                |
| Express | HY-15270  | O=C(C1=C(C(C=CC=C1)NC2=NC(NC3=C(C=C(C(C=C3)N4CCOCC4)O)C)=NC=C2C)N                                     | C23H25ClN6O3   | 468.936 | NVP-TAE 226               |
| Medchem |           | NC1=NC=NC2=C1N=CN2[C@@H]3[C@@H](O)[C@H](O)[C@@H](CN([C@@H]4C[C@@H](CCC5=NC6=C(C(C=CC(C(C)C)C)C)C)C)O3 | C30H42N8O3     | 562.706 | EPZ-5676                  |
| Express | HY-15593  | O=C1O[C@@H]([C@@H](N1CC2=CC(C(F)(F)F)=CC=C2C3=CC(C(C)C)=C(C=C3O)F)C4=CC(C(F)(F)F)=CC(C(F)(F)F)=C4     | C30H25F10NO3   | 637.508 | Anacetrapib               |
| Medchem |           | O=C(C1=C(C(C)C2=CC=CC=C2)N3=C(C=C(C=C13)N[C@@H](C4=CC=C(C=C4)CC                                       | C26H24N2O      | 380.482 | SB-222200                 |
| Express | HY-15722  |                                                                                                       |                |         |                           |
| Medchem |           |                                                                                                       |                |         |                           |
| Express | HY-13287  | CN1CCC(CC1)CNC2=NN3C(C=C2)=NC=C3C4=CC=CC(OC(F)(F)F)=C4                                                | C20H22F3N5O    | 405.417 | SG1-1776                  |
| Medchem |           |                                                                                                       |                |         |                           |
| Express | HY-15388  | O=C(C1=CC=C(C#CC2=CC=C3C(C(C)(C)CCS3)=C2)N=C1)OCC                                                     | C21H21NO2S     | 351.462 | Tazarotene                |
| Medchem |           |                                                                                                       |                |         |                           |
| Express | HY-14171  | CC1(C2=C(C(C)(CC1)C)C=C(C(C(C3=CC=C(C(C=C3)C(O)=O)=C)=C2)C)C                                          | C24H28O2       | 348.478 | Bexarotene                |
| Medchem |           |                                                                                                       |                |         |                           |
| Express | HY-B0246  | O=C(N1C2=CC=CC=C2C=CC3=CC=CC=C3)N                                                                     | C15H12N2O      | 236.269 | Carbamazepine             |
| Medchem |           | O=C(NC1=CC=CC(F)=C1)CC2=CC(CN3=C4C=CC(OC(CCN(CC)CCOP(O)(O)=O)=CC4=NC=N3)=NN2                          | C26H31FN7O6P   | 587.54  | AZD1152                   |
| Express | HY-10127  | O=C(C(C1=CN2CCN(C(N3CCCC3)=O)CC4=CC(F)=CC1=C42)=C5C6=C(N=C7C=CC=CN7)NC5=O                             | C28H25FN6O3    | 512.535 | LY2090314                 |
| Medchem |           | BrC1=CN=C(C(OCOC2=C(C3=CC=C(Br)C=C3)C(NS(NCCC)(=O)=O)=NC=N2)N=C1                                      | C19H20Br2N6O4S | 588.273 | Macitentan                |
| Express | HY-14184  |                                                                                                       |                |         |                           |
| Medchem |           |                                                                                                       |                |         |                           |
| Express | HY-16692  | O=C(OC)CC1ON=C(C(C=C2)=CC=C2O)C1                                                                      | C12H13NO4      | 235.236 | ISO-1                     |
| Medchem |           |                                                                                                       |                |         |                           |
| Express | HY-12246  | O=C(O)C1=C(C(C(F)(F)F)=CC=C1N2C[C@@H](OCC3=NC=CC=C3)CC2                                               | C18H17F3N2O3   | 366.334 | XEN445                    |
| Medchem |           |                                                                                                       |                |         | Guanfacine                |
| Express | HY-17416  | O=C(NC(N)=N)CC1=C(C(=O)C=CC=C1Cl.[H]Cl                                                                | C9H10Cl3N3O    | 282.554 | (hydrochloride)           |
| Medchem |           |                                                                                                       |                |         |                           |
| Express | HY-13734  | CCC(SSC1=NC=CN1)C                                                                                     | C7H12N2S2      | 188.314 | PX-12                     |
| Medchem |           |                                                                                                       |                |         |                           |
| Express | HY-15388  | O=C(C1=CC=C(C#CC2=CC=C3C(C(C)(C)CCS3)=C2)N=C1)OCC                                                     | C21H21NO2S     | 351.462 | Tazarotene                |
| Medchem |           |                                                                                                       |                |         |                           |
| Express | HY-15433  | O=C(C1=CN=C(N2CCC(CNCC3=NC(C)C4=C3C=CC=C4)CC2)N=C1)NO                                                 | C21H26N6O2     | 394.47  | Quisinostat               |
| Medchem |           |                                                                                                       |                |         |                           |
| Express | HY-13227  | FC1=CC=C(C(=O)C=C1C2=NC3=NC=CN=C3(CN4=CC=NC=C4)=N2                                                    | C17H10ClFN6    | 352.753 | SD-208                    |
| Medchem |           |                                                                                                       |                |         |                           |
| Express | HY-13688  | O=C(NC(C=C1C2=C3C=CC=C2)=CC=C1NC3=O)CN(C)C.Cl                                                         | C17H18ClN3O2   | 331.797 | PJ34 (hydrochloride)      |
| Medchem |           |                                                                                                       |                |         |                           |
| Express | HY-13749  | O=C(N1CC2=NN=C(C(F)(F)F)N2CC1)C[C@@H](N)CC3=CC(F)=C(F)C=C3F                                           | C16H15F6N5O    | 407.314 | Sitagliptin               |
| Medchem |           |                                                                                                       |                |         |                           |
| Express | HY-15202  | BrC1=CC=C(C(F)=C1)NC2=C(C3=C(C=C2C(NOCCO)=O)N(C=N3)C)F                                                | C17H15BrF2N4O3 | 441.227 | MEK162                    |
| Medchem |           | O=C(NC1=CC(C(C)(C)C)=NN1C2=CC=C(C(C)C=C2)NC3=C4C=CC=CC4=C(OCN5CCOCC5)C=C3                             | C31H37N5O3     | 527.657 | Doramipimod               |
| Express | HY-10320  |                                                                                                       |                |         |                           |
| Medchem |           |                                                                                                       |                |         |                           |
| Express | HY-13104  | S=C(NCCCCNC(NC1=CC(N=C=S)=CC=C1)=S)NC2=CC(N=C=S)=CC=C2                                                | C20H20N6S4     | 472.673 | MRS 2578                  |
| Medchem |           |                                                                                                       |                |         | Desvenlafaxine (succinate |
| Express | HY-B0602A | OC1=CC=C(C(C2(O)CCCCC2)CN(C)C)C=C1.O=C(O)CCC(O)=O.O                                                   | C20H33NO7      | 399.479 | hydrate)                  |
| Medchem |           | O=C(C1=CC=CN(C2=CC=C(F)C(F)=C2)C1=O)N[C@@H](C3=CC=CC=C3)CO4=C(C=C(C(N5)C(NC5=O)=C4                    | C28H22F2N4O4   | 516.496 | PDK1 inhibitor            |
| Express | HY-14440  | O=C(NC1=CC=C(C2=CC=C(C([C@@H]3CCCC[C@@H]3C(O)=O)=O)C=C2)C=C1)NC4=CC=CC=C4                             | C26H24N2O4     | 428.48  | A 922500                  |
| Medchem |           |                                                                                                       |                |         |                           |
| Express | HY-15315  | N#CCC1(N2N=CC(C3=C4C(NC=C4)=NC=N3)=C2)CN(S(=O)(CC)=O)C1                                               | C16H17N7O2S    | 371.417 | Baricitinib               |
| Medchem |           | CC1=CC=C(C=C1NC2=NC(C3=CC=CN=C3)=NC4=C2C=NN4C)C(NC5=CC=CC(C(F)(F)F)=C5)=O                             | C26H20F3N7O    | 503.479 | NVP-BHG712                |
| Express | HY-13258  |                                                                                                       |                |         |                           |

|         |           |                                                              |                |         |                              |
|---------|-----------|--------------------------------------------------------------|----------------|---------|------------------------------|
| Medchem |           | [H]Cl.COC1=C(O(C)C)=C(C(N[C@H]2[C@H](C(C)O)CNC2)=NC(C3=C(O   |                |         | CCT241533                    |
| Express | HY-14715B | )C=CC(F)=C3)=N4)C4=C1                                        | C23H28ClFN4O4  | 478.944 | (hydrochloride)              |
| Medchem |           | CCCCNC1=NC(N[C@H]2CC[C@H](O)CC2)=C(C(NCC3=CC=C(N4C=NC        |                |         |                              |
| Express | HY-15798  | =C4)C=C3)=O)C=N1                                             | C25H33N7O2     | 463.575 | UNC2881                      |
| Medchem |           | O=C(C1=C2C(N=C(OCC)N2CC3=CC=C(C4=CC=CC=C4C(N5=NOC5=O)        |                |         |                              |
| Express | HY-14914  | C=C3)=CC=C1)O                                                | C25H20N4O5     | 456.45  | Azilsartan                   |
| Medchem |           | NC1=NC=C(C2=CC=C(S(=O)(C(C)C)=O)C=C2)N=C1C3=CC(C4=CC=C(C     |                |         |                              |
| Express | HY-13902  | NC)C=C4)=NO3                                                 | C24H25N5O3S    | 463.552 | VE-822                       |
| Medchem |           | O=C(O)C1=CC=C(N(CC2=CC=C(C3CCCCC3)C=C2)C(CN(C)S(=O)(C4=C(    |                |         |                              |
| Express | HY-16975  | F)C(F)=C(F)C(F)=C4F)=O)=O)C=C1                               | C29H27F5N2O5S  | 610.592 | SH-4-54                      |
| Medchem |           | O=C(N([C@@H](C1=NC2=NC=CC=C2C(N1C3=CC=C(OCC)C=C3)=O)C)       |                |         |                              |
| Express | HY-15320  | CC4=CC=CN=C4)CC5=CC=C(F)C(C(F)(F)F)=C5                       | C32H27F4N5O3   | 605.582 | NBI-74330                    |
| Medchem |           |                                                              |                |         |                              |
| Express | HY-13075  | CN(CC1)CCN1C2=CC=C(NC(C3=CC(C#N)=CN3)=O)C(N4CCC(C)CC4)=C2    | C23H30N6O      | 406.524 | c-FMS inhibitor              |
| Medchem |           | O=C([C@H](CSSCCC(N[C@@H](C1=O)CC2=CC=C(OCC)C=C2)=O)NC([      |                |         |                              |
| Express | HY-17572  | C@@H](NC(C(NC([C@](N1)([H])([C@@H](C)CC)=O)[C@H](O)C)=O)CC(  | C43H67N11O12S2 | 994.189 | Atosiban                     |
| Medchem |           | N)=O)=O)N(CCC3)[C@@H]3C(N[C@@H](CCCN)C(NCC(N)=O)=O)=O        |                |         |                              |
| Express | HY-50907  | CN(CC[C@@H](NC1=CC=C(C=C1[N+])([O-                           |                |         |                              |
| Medchem |           | ))=O)S(NC(C2=CC=C(C=C2)N3CCN(CC3)CC4=CC=CC=C4C5=CC=C(C=      | C42H45ClN6O5S2 | 813.427 | ABT-737                      |
| Express | HY-10109  | C5)Cl)=O)(=O)=O)CS C6=CC=CC=C6)C                             |                |         |                              |
| Medchem |           |                                                              |                |         |                              |
| Express | HY-10109  | O=C(NC(/=O)SC1=C/C2=CC=C3N=CC=NC3=C2                         | C12H7N3O2S     | 257.268 | AS-605240                    |
| Medchem |           | F(C1=C1N=C(C(NC2=C(C1)N([C@@H]3[C@@H](F)CN(C4CO C4)CC3)N=C2) |                |         |                              |
| Express | HY-12282  | N=C1NC)(F)F                                                  | C17H20ClF4N7O  | 449.834 | GN-9605                      |
| Medchem |           | CCC1=CN=C(N2CCC(C3=NC(CO C4=CC=C(N5N=NN=C5)C=C4)=CS3)CC      |                |         |                              |
| Express | HY-15291  | 2)N=C1                                                       | C22H24N8O S    | 448.544 | MBX-2982                     |
| Medchem |           |                                                              |                |         |                              |
| Express | HY-19351  | O=C1C=C(C2=CC=C(C(C)C)C=C2)OC3=CC=CC=C13                     | C18H16O2       | 264.319 | MN-64                        |
| Medchem |           | O=C1C(C2=NC3=CC(N4CCOCC4)=CC(C)=C3N2)=C(C=CN1)N[C@@H](       |                |         |                              |
| Express | HY-10262  | O)C5=CC=CC(C1)=C5                                            | C25H26ClN5O3   | 479.959 | BMS-536924                   |
| Medchem |           | ClC1=CC2=C(C=C1)C=CC(/C=C/C3=CC([C@H](SCC4(C([O-             |                |         |                              |
| Express | HY-13315  | ))=O)CC4)CCC5=CC=CC=C5C(C)(O)C)=CC=C3)=N2.[Na+]              | C35H35ClNNaO3S | 608.165 | Montelukast (sodium)         |
| Medchem |           |                                                              |                |         |                              |
| Express | HY-15224  | COC(C=C1)=CC=C1CN2C3=CC(C(NO)=O)=CC=C3C=C2                   | C17H16N2O3     | 296.321 | PCI-34051                    |
| Medchem |           |                                                              |                |         |                              |
| Express | HY-13340  | CC1=C2C(SC(C(NCC3=CC=C(O(C)C=C3)=O)=C2N)=NC(C)=C1            | C18H19N3O2S    | 341.427 | VU0152100                    |
| Medchem |           | O=C1N(C[C@@]([H])(CCC2)C3=C2C=CC=C13)[C@@H]4CN5CCC4CC5.[     |                |         |                              |
| Express | HY-A0021  | H]Cl                                                         | C19H25ClN2O    | 332.868 | Palonosetron (Hydrochloride) |
| Medchem |           |                                                              |                |         |                              |
| Express | HY-14397  | COC1=CC=C(N(C(C2=CC=C(C1)C=C2)=O)C(C)=C3CC(O)=O)C3=C1        | C19H16ClNO4    | 357.788 | Indomethacin                 |
| Medchem |           |                                                              |                |         |                              |
| Express | HY-18314  | O=C1/C(C2=NC=CC=C2N1)=C\C3=CN(C)C4=C3C=CC=C4                 | C17H13N3O      | 275.305 | GW 441756                    |
| Medchem |           |                                                              |                |         |                              |
| Express | HY-15452  | O=C(C1C(NC2=C3C=C(C1)C=C2)=C3CCC1)N                          | C13H13ClN2O    | 248.708 | EX-527                       |
| Medchem |           | O=C(C1=CC=CC=C1)N(C)[C@H]2[C@@H](O(C)[C@@]3(C)N(C4=C5C=C     |                |         |                              |
| Express | HY-10230  | C=C4)C6=C5C7=C(C(NC7)=O)C8=C6N(C9=CC=CC=C9)[C@@](O3)([H])    | C35H30N4O4     | 570.637 | PKC412                       |
| Medchem |           | CC1=CC=CC(C(C(N2CCC3=C2C=CC(C4=CN(C)C5=NC=NC(N)=C54)=C3F)    |                |         |                              |
| Express | HY-13820  | =O)=N1                                                       | C23H21FN6O     | 416.451 | GSK2656157                   |
| Medchem |           |                                                              |                |         |                              |
| Express | HY-13805  | NC1=C2C(N(C(C)C)N=C2C3=CC=C(C1)C=C3)=NC=N1                   | C15H16ClN5     | 301.774 | PP2                          |
| Medchem |           | O=C(C1=CC=C([C@@H](C)N)C=C1)NC2=C3C(NC=C3)=NC=C2.[H]Cl.[H]   |                |         |                              |
| Express | HY-10069  | Cl                                                           | C16H18Cl2N4O   | 353.246 | Y-33075 (dihydrochloride)    |
| Medchem |           | O=C(C[C@H]1C2=NN=C(N2C3=C(C(C4=CC=C(C=C4)Cl)=N1)C(C)=C(S3)   |                |         |                              |
| Express | HY-13030  | C)C)OC(C)C)C                                                 | C23H25ClN4O2S  | 456.988 | (+)-JQ-1                     |
| Medchem |           |                                                              |                |         |                              |
| Express | HY-16425  | O=C(NCCCCC(NC1=CC=CC=C1N)=O)C2=CC=C(C)C=C2                   | C20H25N3O2     | 339.431 | RG2833                       |
| Medchem |           |                                                              |                |         |                              |
| Express | HY-12041  | O=C1C2=C3C(NN=C3C4=C1C=CC=C4)=CC=C2                          | C14H8N2O       | 220.226 | SP600125                     |
| Medchem |           |                                                              |                |         |                              |
| Express | HY-14711  | C1(NC2=CC=C(N3CCOCC3)C=C2)=NC(NC4CCCCC4)=C5C(NC=N5)=N1       | C21H27N7O      | 393.485 | Reversine                    |
| Medchem |           | OC(C(/C=N1CCN(C)CC1)=C(NC(/C)=Cl)C=C[C@@H]([C@@H]([C@        |                |         |                              |
| Express | HY-B0272  | @H)(C)[C@H]2O)O)C)=O)C(O)=C3C(O)=C4C)=C3C5=C4O[C@](C)(O/C    | C43H58N4O12    | 822.94  | Rifampicin                   |
| Medchem |           | =C/[C@@H]([C@H]([C@@]([C@@H]2C)([H])O(C)=O)C)OC)C5=O         |                |         |                              |
| Express | HY-12529  | O=C1N=C(NCC2=CC=CS2)S/C1=C\C3=CC=C4N=CC=C4=C3                | C18H13N3O S2   | 351.445 | Ro-3306                      |
| Medchem |           | NC(C1=CN=C(N[C@H]2[C@@H](N)CCCC2)N=C1NC3=CC=CC(N4N=CC=       |                |         |                              |
| Express | HY-15323  | N4)=C3)=O.[H]Cl                                              | C19H24ClN9O    | 429.907 | (Hydrochloride)              |

|         |           |                                                               |                 |          |                           |
|---------|-----------|---------------------------------------------------------------|-----------------|----------|---------------------------|
| Medchem |           |                                                               |                 |          |                           |
| Express | HY-B0553  | CC(/N=C1SC(S(=O)(N)=O)=NN/1C)=O                               | C5H8N4O3S2      | 236.272  | Methazolamide             |
| Medchem |           | C1C1=CC=C(C(C@H)(C2=CC=CC(C#N)=C2)[C@@H](NC(C(C)(OC3=CC       |                 |          |                           |
| Express | HY-10013  | =C(C=N3)C(F)(F)C)=O)C)C=C1                                    | C27H25ClF3N3O2  | 515.955  | Taranabant                |
| Medchem |           | N#CC1(NC([C@@H](N[C@H](C(F)(F)F)C2=CC=C(C3=CC=C(S(=O)(C)=     |                 |          |                           |
| Express | HY-10042  | O)C=C3)C=C2)CC(C)(F)C)=O)CC1                                  | C25H27F4N3O3S   | 525.559  | Odanacatib                |
|         |           | O=C([C@@](CCCC1)([H])N1C(C([C@@]2(O)[C@H](C)C[C@H](OC)[C@     |                 |          |                           |
| Medchem |           | @)(O2)([H])[C@@H](OC)C[C@@H](C)C(C)=C/[C@H]3CC=C)=O)=O)       |                 |          |                           |
| Express | HY-13756  | O[C@H](/C(C)=C/[C@H]4C[C@@H](OC)[C@H](O)CC4)[C@H](C)[C@@H     | C44H69NO12      | 804.018  | Tacrolimus                |
| Medchem |           | H)(O)CC3=O                                                    |                 |          |                           |
| Express | HY-B0121  | O=C(O)CCC(O)=O.O.O=S(CCC1=CC2=C(NC=C2CCN(C)C)C=C1)(NC)=O      | C18H27N3O6S     | 413.489  | Sumatriptan (succinate)   |
| Medchem |           | O=C(O)C(C)CC1=C(SC(C)(C)C)C2=C(C=CC(OCC3=NC4=CC=CC=C4         |                 |          |                           |
| Express | HY-10037  | C=C3)=C2)N1CC5=CC=C(C)C=C5                                    | C34H35ClN2O3S   | 587.171  | MK-0591                   |
| Medchem |           | O=C1C2(NC[C@@H](C3=CC(F)=CC(F)=C3)N1CC(NC4=CC5=C(C[C@@]       |                 |          |                           |
| Express | HY-10302  | 6(C(NC7=C6C=CC=N7)=O)C5)C=C4)=O)CCCC2.Cl                      | C31H30ClF2N5O3  | 594.051  | MK-3207 (Hydrochloride)   |
| Medchem |           | O[C@@H]1[C@H]([C@H]([C@H](N2C=NC3=C2N=CN=C3N[C@@H]4[C         |                 |          |                           |
| Express | HY-18978  | @H)(O)CCCC(O1)O)O                                             | C15H21N5O5      | 351.358  | GR79236                   |
| Medchem |           | [H]Cl.O=C1N(CCN)C2=CC(OC)=CC=C2N1C([C@H]3[C@H](C(C)C)CC[C     |                 |          |                           |
| Express | HY-16162A | @H)(C)C3)=O                                                   | C21H32ClN3O3    | 409.95   | D-3263 (hydrochloride)    |
| Medchem |           | C[C@]1([C@](CC2)([H])(C@]3[H])CCCC=C(O)C)CC[C@]4(C)[C@@]3([H] |                 |          |                           |
| Express | HY-B0697  | )CC1)=O)C2=O                                                  | C19H26O3        | 302.408  | Formestane                |
| Medchem |           | CO C1=CC2=C(NC3CCN(CC4CCCC4)CC3)N=C(N5CCN(C(C)C)CCC5)N=C      |                 |          |                           |
| Express | HY-13808  | 2C=C1O CCCN6CCCC6                                             | C37H61N7O2      | 635.926  | UNC 0631                  |
| Medchem |           |                                                               |                 |          |                           |
| Express | HY-13812  | NC1=CC2=C(NCCC3=CC=C(O)C4=CC=CC=C4)C=C3)N=CN=C2C=C1           | C22H20N4O       | 356.42   | QNZ                       |
| Medchem |           | C[C@@]12[C@](C[C@H](C)[C@]2(O)C(CO)=O)([H])(C@]3[H])CCCC=C    |                 |          |                           |
| Express | HY-13570  | C(C=C[C@]4(C)[C@@]3F)[C@H](O)C1)=O                            | C22H29FO5       | 392.461  | Betamethasone             |
| Medchem |           | O=C1NC([C@H]2[C@@H](CN(C2)CC3=CC=CC=C3)C)=NC4=C1C=NN4C        |                 |          |                           |
| Express | HY-50865  | 5CCOCC5                                                       | C22H27N5O2      | 393.482  | PDE-9 inhibitor           |
| Medchem |           | O=C1C=C(N2CCOCC2)OC3=C1C=CC=C3C4=CC=CC5=C4SC6=C5C=CC          |                 |          |                           |
| Express | HY-11006  | =C6                                                           | C25H19NO3S      | 413.488  | KU-57788                  |
| Medchem |           | O=C(NCCN1CCCC1)C2=C(NC(/C=C3C(NC4=C1.3C=C(C=C4)F)=O)=C2C)     |                 |          |                           |
| Express | HY-10330  | C                                                             | C22H25FN4O2     | 396.458  | Toceranib                 |
| Medchem |           | O=C(NC1=CC=C(NC2=NC(N)=NC(C)=C2)C=C1)C3=CC=C(C(NC4=CC=NC5     |                 |          |                           |
| Express | HY-13962  | =CC=CC=C45)C=C3                                               | C27H23N7O       | 461.518  | SGI-1027                  |
| Medchem |           | O[C@H]([C@@H]1O)[C@@H](O[C@@H]1C(NC)=O)N2C3=NC(CI)=NC(N       |                 |          |                           |
| Express | HY-12365  | CC4=CC(I)=CC=C4)=C3N=C2                                       | C18H18ClIN6O4   | 544.731  | 2-CHB-MECA                |
| Medchem |           | NC(C(NC(C)NC(C)NC(C)C1=CN2=C1C=CC=C2)C3=O)=O)CC4=CC=CC=       |                 |          |                           |
| Express | HY-17365  | C4)=O)CSSCC(C(NC(CO)C(O)C)=O)NC(C(NC(C(CCCCN)N3)=O)C(O)C)=    | C51H70N10O12S2  | 1079.291 | Octreotide (acetate)      |
| Medchem |           | O)=O)CC5=CC=CC=C5.CC(O)=O                                     |                 |          |                           |
| Express | HY-B1227  | O=C(O)C(C)C1=CC(NC2=C3C=C(C(C)C=C2)=C3C=C1                    | C15H12ClNO2     | 273.714  | Carprofen                 |
| Medchem |           | O=C(C1=C2SC(C)C3=C(NN=C3C)C)=C1C(N4C[C@@H](CO4)O)=O)N(C(N     |                 |          |                           |
| Express | HY-13248  | 2CC(C)C)=O)C                                                  | C21H27N5O5S     | 461.535  | AR-C155858                |
| Medchem |           | OC(C1=CC=C(O)CO2)C2=C1)(C3CCN(C(CO4=CC=C([N+])([O-            |                 |          |                           |
| Express | HY-15249  | ))=O)C=C4)=O)CC3)C5=CC(O)CO6)=C6=C5                           | C27H24N2O9      | 520.487  | JZL 184                   |
| Medchem |           | O=C(O)/C=C1C(O)=O.CC(C)(C)C#C/C=C/CC(C)CC1=CC(OCC2=CC(C3      |                 |          |                           |
| Express | HY-16343C | =CSC=C3)=CS2)=CC=C1                                           | C31H35NO5S2     | 565.743  | NB-598 (Maleate)          |
| Medchem |           |                                                               |                 |          |                           |
| Express | HY-14111  | O=C(NC)C(C=N1)=CC=C1O C2=CC(C)C3=C(C=C2)CCN3C4CCCC4           | C21H25N3O2      | 351.442  | GSK189254A                |
| Medchem |           | NS(O[C@]1(O(C(C)(O)O2)[C@@H]2[C@H](O(C(C)(O)O3)[C@H]3CO1)(=   |                 |          |                           |
| Express | HY-B0122  | O)=O                                                          | C12H21NO8S      | 339.362  | Topiramate                |
| Medchem |           |                                                               |                 |          |                           |
| Express | HY-15455  | O=C(NC1=C(C)C=NC=C1C)C2=CC=C(O(C(F)F)C(C)OCC3CC3)=C2          | C17H14Cl2F2N2O3 | 403.208  | Roflumilast               |
| Medchem |           |                                                               |                 |          |                           |
| Express | HY-B0134  | CC(C)C[C@@H](C(O)=O)NC([C@@H](O)[C@H](N)CC1=CC=CC=C1)=O       | C16H24N2O4      | 308.373  | Bestatin                  |
| Medchem |           | O=C(C1=C(N(C)C2=C1C=CC=C2)=C3C4=CN(C5CCN(CO6=NC=CC=C6)        |                 |          |                           |
| Express | HY-10342  | CC5)C7=C4C=CC=C7)NC3=O                                        | C32H29N5O2      | 515.605  | Enzastaurin               |
| Medchem |           | CS(=O)(NC1=CC=C(NC2=C(C=CC=C3)C3=NC4=CC=CC=C42)C(O)C)=C1      |                 |          |                           |
| Express | HY-13551  | )=O                                                           | C21H19N3O3S     | 393.459  | Amsacrine                 |
| Medchem |           | O=C(NCC(N[C@H]1CN([C@@H]2CC[C@])(C3=CC=C(O)C)N=C3)(O)CC2)     |                 |          |                           |
| Express | HY-15450C | CC1)=O)C4=CC=CC(C(F)(F)F)=C4                                  | C26H31F3N4O4    | 520.544  | INCB 3284 enantiomer 1    |
| Medchem |           |                                                               |                 |          |                           |
| Express | HY-B0188A | CN(CC1)CC2N1C3=CC=CC=C3CC4=CC=CC=C24.Cl                       | C18H21ClN2      | 300.826  | Mianserin (hydrochloride) |
| Medchem |           | O=C(NC1=CC(C(F)(F)F)=CC(N2C=NC(C)=C2)=C1)C3=CC=C(C(C)C(NC4=N  |                 |          |                           |
| Express | HY-10159  | C=CC(C5=CC=CN=C5)=N4)=C3                                      | C28H22F3N7O     | 529.516  | Nilotinib                 |



|         |            |                                                                               |                 |         |                             |  |
|---------|------------|-------------------------------------------------------------------------------|-----------------|---------|-----------------------------|--|
| Medchem |            |                                                                               |                 |         |                             |  |
| Express | HY-16114   | <chem>COC1=CC(C(C2=C(C(C)OC3=C(O)C(C)OC=CC23)=O)=CC(OC)=C1OC</chem>           | C20H20O7        | 372.369 | BNC105                      |  |
| Medchem |            | <chem>O=C(O)CN(CCOCC1=CC=C(C(C2=CC=C(C(OCO3)C3=C2)C=C1C(C)(C)C)C.C.[Cl</chem> |                 |         | LY2365109                   |  |
| Express | HY-100416A | <chem>H]</chem>                                                               | C22H28ClNO5     | 421.914 | (hydrochloride)             |  |
| Medchem |            | <chem>ClC1=C(C(C=CC(NC2=NC=NC3=C2C=C(C(C(OC)=C3)OCCCN4CCOCC4)=C1)</chem>      |                 |         |                             |  |
| Express | HY-50895   | <chem>F</chem>                                                                | C22H24ClFN4O3   | 446.902 | Gefitinib                   |  |
| Medchem |            | <chem>C[C@@@]12[C@](OC3=O)(CC3)CC[C@@@]1([H])[C@@@]([C@@@H](CC4=C</chem>      |                 |         |                             |  |
| Express | HY-B0561   | <chem>C5=O)SC(C)=O)([H])[C@]([C@]4(CC5C)([H])CC2</chem>                       | C24H32O4S       | 416.574 | Spironolactone              |  |
| Medchem |            | <chem>O=C1N(C2=C(C(C3=CC=CC(C)=C3)=C1)C=C(C=C2)[C@@@](N)(C4=CN=</chem>        |                 |         |                             |  |
| Express | HY-10502   | <chem>CN4C)C5=CC=C(C(C=C5)Cl)C</chem>                                         | C27H22Cl2N4O    | 489.396 | Tipifarnib                  |  |
| Medchem |            | <chem>O=C([C@@@H](NC([C@H]([C@@@H](C)O)NC([C@@@H](NC([C@H]([C@@@</chem>       |                 |         |                             |  |
| Express | HY-13821   | <chem>H])(C)CC)N(C)C(C)=O)=O)[C@@@H](C)CC)=O)=O)CC(C)C)[C@@@]1(C)CO</chem>    | C28H50N4O7      | 554.719 | Epoxomicin                  |  |
| Medchem |            | <chem>ClC1=C(CN2N=C(C(C(F)(F)F)=CC=C3)C3=C2C4=CC=C(C(F)=C4)C=CC(F</chem>      |                 |         |                             |  |
| Express | HY-10629   | <chem>)=C1</chem>                                                             | C21H12ClF5N2    | 422.778 | LXR-623                     |  |
| Medchem |            |                                                                               |                 |         |                             |  |
| Express | HY-15640   | <chem>S=C(N1CCCC2=CC(O)=C(O)C=C2C1)NCCC3=CC=C(C)C=C3</chem>                   | C19H21ClN2O2S   | 376.9   | Capsazepine                 |  |
| Medchem |            | <chem>O=C(N1CCC[C@@@H]([C@@@H](OCCNC(OC)=O)C2=CC=CC(C)=C2)C1)N</chem>         |                 |         | VTP-27999 (2,2,2-           |  |
| Express | HY-50769   | <chem>C[C@@@H](NC)C[C@@@H]3COCCC3.O=C(C(F)(F)F)O</chem>                       | C28H42ClF3N4O7  | 639.104 | trifluoroacetate)           |  |
| Medchem |            | <chem>O=C(O)CC1=CC=C(C(C2=CC=C(C3=C(NC(O[C@@@H](C4=CC=CC=C4)C)=</chem>        |                 |         |                             |  |
| Express | HY-16040   | <chem>O)C(C)=NO3)C=C2)C=C1</chem>                                             | C27H24N2O5      | 456.49  | AM095 (free acid)           |  |
| Medchem |            |                                                                               |                 |         |                             |  |
| Express | HY-B0422   | <chem>O=C(O)[C@@@H](CC1=CC=CC=C1)NC([C@H]2CC[C@@H](C(C)C)CC2)=O</chem>        | C19H27NO3       | 317.423 | Nateglinide                 |  |
| Medchem |            | <chem>F C1=CC=C(C(F)=C1C(C2=CC=CC=C2)C=C(C(C=C3)C4=CC=C(C(C=C4)Cl)=O)</chem>  |                 |         |                             |  |
| Express | HY-12057   | <chem>NS(CCC)(=O)=O</chem>                                                    | C23H18ClF2N3O3S | 489.922 | Vemurafenib                 |  |
| Medchem |            | <chem>C[C@@@]12C(C3=CN=CC=C3)=CC[C@@]1([C@@@]4(CC=C5[C@@@](C)([C@</chem>      |                 |         |                             |  |
| Express | HY-70013   | <chem>]4(CC2[H])CC[C@@@H](C5O)[H])[H]</chem>                                  | C24H31NO        | 349.509 | Abiraterone                 |  |
| Medchem |            |                                                                               |                 |         |                             |  |
| Express | HY-B0101   | <chem>F C1=CC=C(C(C)O)(CN2C=NC=N2)CN3C=NC=N3)C(F)=C1</chem>                   | C13H12F2N6O     | 306.271 | Fluconazole                 |  |
| Medchem |            |                                                                               |                 |         |                             |  |
| Express | HY-18008   | <chem>O=C(C1=CC=CN=C1)NC2=CC(C)=CC3=C2NC4=C3C=CN=C4</chem>                    | C17H11ClN4O     | 322.748 | PS-1145                     |  |
| Medchem |            |                                                                               |                 |         |                             |  |
| Express | HY-15416   | <chem>O=C1NC2=C(C=CC(C)C2Cl)/C1=N/O</chem>                                    | C8H4Cl2N2O2     | 231.036 | NS309                       |  |
| Medchem |            |                                                                               |                 |         |                             |  |
| Express | HY-13822   | <chem>OC1=CC=C(CNC2=NC(C3=CC=C(C(C)C)=C3)=CS2)C=C1</chem>                     | C15H11ClN2OS    | 302.779 | SKI II                      |  |
| Medchem |            |                                                                               |                 |         |                             |  |
| Express | HY-19533   | <chem>NC1=NC(N(CCC2=CC=CC=C2)N=C3)=C3C4=NC(C5=CC=CO5)=NN14</chem>             | C18H15N7O       | 345.358 | SCH 58261                   |  |
| Medchem |            |                                                                               |                 |         |                             |  |
| Express | HY-15471   | <chem>O=C(OC)NC1=CC=C(NCC2=CC=C(F)C2)C=C1N</chem>                             | C16H18FN3O2     | 303.331 | Retigabine                  |  |
| Medchem |            | <chem>O=C([C@H]1CC[C@H](C2=NC(C(N3)=CC4=C3C(OC)=CC=C4)=C5C(N)=</chem>         |                 |         |                             |  |
| Express | HY-10423   | <chem>NC=NN52)CC1)O</chem>                                                    | C21H22N6O3      | 406.438 | OSI-027                     |  |
| Medchem |            |                                                                               |                 |         |                             |  |
| Express | HY-B0774   | <chem>CC(C1=O)=C(C(C(C)=C1C)=O)C(C2=CC=CC=C2)CCCCC(O)=O</chem>                | C22H26O4        | 354.44  | Seratrodast                 |  |
| Medchem |            | <chem>C[N+](C)(OC1=CC=C(NC(C2=CC3=CC(C4=CC=C(C(C)C=C4)=CC=C3CCC2)</chem>      |                 |         |                             |  |
| Express | HY-13406   | <chem>=O)C=C1)C5CCOC5.[Cl-]</chem>                                            | C33H39ClN2O2    | 531.128 | TAK-779                     |  |
| Medchem |            | <chem>O=C(C1=NC=CC=C1)NC2=CC=C(S(=O)(NC3=CC=CC=C3Cl)=O)C(Cl)=C</chem>         |                 |         |                             |  |
| Express | HY-15476   | <chem>2</chem>                                                                | C18H13Cl2N3O3S  | 422.285 | VU 0364439                  |  |
| Medchem |            |                                                                               |                 |         |                             |  |
| Express | HY-15472   | <chem>N#CC1=CC(CN2CCC(NC3=C(C=C(Cl)S4)C4=NC=N3)CC2)=CC=C1F</chem>             | C19H17ClFN5S    | 401.888 | PRX-08066                   |  |
| Medchem |            |                                                                               |                 |         | 4-[(4-chlorophenyl)methyl]- |  |
| Express | HY-76859   | <chem>O=S(C1=CC(F)=CC2=C1N(C(C(C3)=CC=C3Cl)C4=C2CCC4CC(O)=O)(</chem>          | C21H19ClFN4S    | 435.896 | 7-fluoro-1,2,3,4-           |  |
| Medchem |            | <chem>C)=O</chem>                                                             |                 |         | tetrahydro-5-               |  |
| Express | HY-16508   | <chem>O=C1CCC2=C3[C@@@H](C4=CC=C(N(C)C)C=C4)C[C@@@]5(C)[C@](CC[C</chem>       | C30H37NO4       | 475.619 | (methylsulfonyl)-           |  |
| Medchem |            | <chem>@]5(OC(C)=O)C(C)=O)([H])[C@]3([H])CCC2=C1</chem>                        |                 |         | Cyclopent[b]indole-3-       |  |
| Express | HY-B0259   | <chem>O=C(NN1(C)C)CC2=C1C=CC=C2)C3=CC=C(C)C(S(=O)(N)=O)=C3</chem>             | C16H16ClN3O3S   | 365.835 | acetic acid                 |  |
| Medchem |            | <chem>C[C@]([C@@@]1([H])[C@]2(CC[C@@@H]3O)C(C[C@@@]2([H])C3(C)C)[C</chem>     |                 |         |                             |  |
| Express | HY-N0156   | <chem>@@]([C4=CC1)(CC[C@@]5(C)O)=O)[C@@@]4([H])C(C)C(C)CC5)C</chem>           | C30H48O3        | 456.7   | Ulipristal (acetate)        |  |
| Medchem |            |                                                                               |                 |         |                             |  |
| Express | HY-15685   | <chem>F C1=CN=CC2=C1C(S(N3CCNC[C@@@H]3C)(=O)=O)=CC=C2.[H]Cl.O.O</chem>        | C15H23ClFN3O4S  | 395.877 | Indapamide                  |  |
| Medchem |            | <chem>O=C(O)C1=CC(OC)=C(NC([C@H]2[C@H](C3=C(F)C(Cl)=CC=C3)[C@](C</chem>       |                 |         | K-115                       |  |
| Express | HY-15676   | <chem>4=CC=C(C)C=C4F)(C#N)[C@H](CC(C)(C)C)N2)=O)C=C1</chem>                   | C31H29Cl2F2N3O4 | 616.482 | RG 7388                     |  |
| Medchem |            | <chem>O=C(C1=C(N)N(C2=CC=C3N=C(C)NC3=C2)N=C1)C(N4)=CC5=C4C=CC=</chem>         |                 |         |                             |  |
| Express | HY-19957   | <chem>C5</chem>                                                               | C20H16N6O       | 356.381 | CH5183284                   |  |
| Medchem |            |                                                                               |                 |         |                             |  |
| Express | HY-70068   | <chem>O=C(NC1=CC(C)=NC2=C(C(C=C2)F)F)NC3=CC=C(C=C3)N(C)C</chem>               | C19H18F2N4O     | 356.369 | SB-408124                   |  |

|         |            |                                                                                                               |               |         |                                   |
|---------|------------|---------------------------------------------------------------------------------------------------------------|---------------|---------|-----------------------------------|
| Medchem |            | CC(C)(O/N=C(C1=CSC(N)=N1)\C(N[C@H]2[C@H](C)N(S(=O)(O)=O)C2=O)=O)C(O)=O                                        | C13H17N5O8S2  | 435.433 | Aztreonam                         |
| Express | HY-B0129   |                                                                                                               |               |         |                                   |
| Medchem |            | CCC(C)(C)C(O[C@H]1C[C@@H](C)C=C2C=C[C@H](C)[C@H](CC[C@@H]3C[C@@H](O)CC(O3)=O)[C@@]12[H])=O                    | C25H38O5      | 418.566 | Simvastatin                       |
| Express | HY-17502   |                                                                                                               |               |         |                                   |
| Medchem |            | O=C1N(C2=CC=CC=C2)C([C@H](NC3=C4N=CNC4=NC=N3)C)=CC5=C1C(O)=CC=C5                                              | C22H17ClN6O   | 416.863 | Duvelisib                         |
| Express | HY-17044   |                                                                                                               |               |         |                                   |
| Medchem |            | ClCC/C(C1=CC=CC=C1)=C(C2=CC=C(OCCO)C=C2)\C3=CC=CC=C3                                                          | C24H23ClO2    | 378.891 | Ospemifene                        |
| Express | HY-B0723   |                                                                                                               |               |         |                                   |
| Medchem |            | O=C(N(C)C)C(N1C2CCCC2)=CC(C1=N3)=CN=C3NC(N=C4)=CC=C4N5CCCNC5                                                  | C23H30N8O     | 434.537 | LEE011                            |
| Express | HY-15777   |                                                                                                               |               |         |                                   |
| Medchem |            | F C(F)(C(O)=O)F.F C(F)(C(O)=O)F.O=C([C@@H]1CC2=C(N=CN2CC3=C(C(N(C)C)C(C)=C3)CN1C(C4=CC=CC=C4)C5=CC=CC=C5)=O)O | C35H34F6N4O7  | 736.657 | PD 123319<br>(ditrifluoroacetate) |
| Express | HY-10259A  |                                                                                                               |               |         |                                   |
| Medchem |            | ClC1=C(N)C(CCO2)=C2C(C(NC3CCN(CCCO)CC3)=O)=C1                                                                 | C18H26ClN3O3  | 367.87  | Prucalopride                      |
| Express | HY-14151   |                                                                                                               |               |         |                                   |
| Medchem |            | CN(C1CCN(C(C2=CC=C(NC(NC3=CC=C(C4=NC(N5CCOCC5)=NC(N6CCOCC6)=N4)C=C3)=O)C=C2)=O)CC1)C                          | C32H41N9O4    | 615.726 | PKI-587                           |
| Express | HY-10681   |                                                                                                               |               |         |                                   |
| Medchem |            | O=C(O)CSC1=CC(NS(=O)(C2=CC=C(Br)C=C2)=O)=C3C=CC=CC3=C1O                                                       | C18H14BrNO5S2 | 468.342 | UMI-77                            |
| Express | HY-18628   |                                                                                                               |               |         |                                   |
| Medchem |            | O=C1[C@@H](C(C)C)[C@@](N(C/C=C/C/N2CCCC2)=O)CC3([H])[C@]3([H])N1S(=O)(C)=O                                    | C19H31N3O4S   | 397.532 | GW311616                          |
| Express | HY-15891   |                                                                                                               |               |         |                                   |
| Medchem |            | O=C(NC1=NC=CS1)[C@H](CC2CCCC2)C3=CC=C(S(=O)(C)=O)C=C3                                                         | C18H22N2O3S2  | 378.509 | Ro 28-1675<br>BCX 1470            |
| Express | HY-10595   |                                                                                                               |               |         |                                   |
| Medchem |            | N=C(C1=CC2=CC=C(O(C(C3=CC=CS3)=O)C=C2S1)N.O=S(O)(C)=O                                                         | C15H14N2O5S3  | 398.477 | (methanesulfonate)                |
| Express | HY-50875   |                                                                                                               |               |         |                                   |
| Medchem |            | ClC1=CC=CC=C1C(N2N=CC=C2)(C3=CC=CC=C3)C4=CC=CC=C4                                                             | C22H17ClN2    | 344.837 | TRAM-34                           |
| Express | HY-13519   |                                                                                                               |               |         |                                   |
| Medchem |            | O=C(O)CCC1=CC=C(NCC2=CC=CC(O C3=CC=CC=C3)=C2)C=C1                                                             | C22H21NO3     | 347.407 | GW9508                            |
| Express | HY-15589   |                                                                                                               |               |         |                                   |
| Medchem |            | O=C(C1(C2=CC=C(O C(F)(F)O3)C3=C2)CC1)NC4=CC5=C(N(C[C@@H](O)CO)C(C(C)CO)=C5)C=C4F                              | C26H27F3N2O6  | 520.498 | VX-661                            |
| Express | HY-15448   |                                                                                                               |               |         |                                   |
| Medchem |            | ClC1=C(C)C(C2=NN=NN2CC3=CC=CN=C3)=CC=C1                                                                       | C13H9Cl2N5    | 306.15  | A 438079                          |
| Express | HY-15488   |                                                                                                               |               |         |                                   |
| Medchem |            | C[C@@H]1O[C@@H](CN(CC(NC2=CC3=C(C=C2)SC4=C(C3)C=CC=C4C5=CC(C=C(O5)N6CCOCC6)=O)=O)C1)C                         | C30H33N3O5S   | 547.665 | KU-60019                          |
| Express | HY-12061   |                                                                                                               |               |         |                                   |
| Medchem |            | O=C(O)CN1C(C)=C(C C2=NC3=CC=CC=C3C=C2)C4=C1C=CC(F)=C4                                                         | C21H17FN2O2   | 348.37  | OC000459                          |
| Express | HY-15342   |                                                                                                               |               |         |                                   |
| Medchem |            | OC(COCCCN(C(C)C)C1=NC(C2=CC=CC=C2)=C(C3=CC=CC=C3)N=C1)=O                                                      | C25H29N3O3    | 419.516 | MRE-269                           |
| Express | HY-79593   |                                                                                                               |               |         |                                   |
| Medchem |            | O=C1N(CCCN(C[C@@H]2C3=CC(O C)=C(O C)C=C3C2)C)CCC4=CC(O C)=C(O C)C=C4C1.Cl                                     | C27H37ClN2O5  | 505.046 | Ivabradine (hydrochloride)        |
| Express | HY-B0162A  |                                                                                                               |               |         |                                   |
| Medchem |            | O=C(C(C1=CC=CC=C1)C2=CC=CC=C2)N3CCN(C(C4=CC=CC=C4)C5=CC=CC=C5)CC3                                             | C32H32N2O     | 460.609 | NP118809                          |
| Express | HY-14462   |                                                                                                               |               |         |                                   |
| Medchem |            | O=C(NC1=C2N=CC=CC=C1)C3=CC=C(N(C([C@]4([H])[C@]([C5]([H])C=C[C@]5([H])[C@]64[H])=O)C6=O)C=C3                  | C25H19N3O3    | 409.437 | IWR-1                             |
| Express | HY-12238   |                                                                                                               |               |         |                                   |
| Medchem |            | O=C(C1=C(C)NC(C)=C(C(O C)=O)C1C2=CC=CC=C2[N+](O-)=O)OC                                                        | C17H18N2O6    | 346.335 | Nifedipine                        |
| Express | HY-B0284   |                                                                                                               |               |         |                                   |
| Medchem |            | O=C1C2=C(NC(N)=N1)NCC(C(O)C(O)C)N2                                                                            | C9H15N5O3     | 241.247 | Tetrahydrobiopterin               |
| Express | HY-107383  |                                                                                                               |               |         |                                   |
| Medchem |            | O=C([C@H]1N(C([C@@H](N[C@H](C(OCC)=O)CCC)=O)[C@@]2([H])CCC[C@@]2([H])C1)O.CC(C)(C)N                           | C23H43N3O5    | 441.605 | Perindopril (erbumine)            |
| Express | HY-B0130A  |                                                                                                               |               |         |                                   |
| Medchem |            | C1(C2=NC3=CC=CC=C3C=C2)=NC4=CC=CC=C4C=C1                                                                      | C18H12N2      | 256.308 | 2,2'-Biquinoline                  |
| Express | HY-W011846 |                                                                                                               |               |         |                                   |
| Medchem |            | O=C(N1[C@@H](CCC1)C(O)=O)[C@@]([C@@H](C)CC)([H])NC([C@@H]2[C@@H](C(NCCC)=O)O2)=O                              | C18H29N3O6    | 383.439 | CA-074                            |
| Express | HY-103350  |                                                                                                               |               |         |                                   |
| Medchem |            | OC(P(O)(O)=O)(P(O)(O)=O)CCN                                                                                   | C3H11NO7P2    | 235.07  | Pamidronic acid                   |
| Express | HY-B0012   |                                                                                                               |               |         |                                   |
| Medchem |            | OC(CCC/C=C/C[C@H]1[C@H]([C@H](O)C[C@H]1O)/C=C/[C@H](O)CO C2=CC(Cl)=CC=C2)=O                                   | C22H29ClO6    | 424.915 | (+)-Cloprostamol                  |
| Express | HY-107381  |                                                                                                               |               |         |                                   |
| Medchem |            | OC([C@@H](N)CCl)=O                                                                                            | C3H6ClNO2     | 123.538 | β-Chloro-L-alanine                |
| Express | HY-107373  |                                                                                                               |               |         |                                   |
| Medchem |            | O=C(NC[C@@H]1[C@@]2([H])CN(CCC(C)(C)C[C@@]12[H])C3=CC(Cl)=CC(Cl)=C3                                           | C19H26Cl2N2O  | 369.329 | ML218                             |
| Express | HY-103309  |                                                                                                               |               |         |                                   |
| Medchem |            | CC(NCCN1C2=C(C3=C1C=CC(C(C)=O)=C3)C=C(C(C)=O)C=C2)C.[H]Cl                                                     | C21H25ClN2O2  | 372.89  | CB0137 HCl                        |
| Express | HY-18935A  |                                                                                                               |               |         |                                   |
| Medchem |            | NC1=NC=C(C C2=C3C=CC(C4CC4)OC3=C(O C)C(O C)=C2)C(N)=N1                                                        | C19H22N4O3    | 354.4   | Iclaprim                          |
| Express | HY-101479  |                                                                                                               |               |         |                                   |
| Medchem |            | O=C1[C@](O)(CC)C2=C(CO1)C(N3CC4=CC5=C(N)C=CC=C5N=C4C3=C2)=O                                                   | C20H17N3O4    | 363.367 | 9-Aminocamptothecin               |
| Express | HY-100309  |                                                                                                               |               |         |                                   |

|         |            |                                                             |                  |         |                                                                      |  |
|---------|------------|-------------------------------------------------------------|------------------|---------|----------------------------------------------------------------------|--|
| Medchem |            | O=S([N-                                                     |                  |         |                                                                      |  |
| Express | HY-11103   | ]C1=C(C(C)=NO1)Cl)(C2=C(SC=C2)C(C3=C(C=C4OCO4=C3)C)=O)=     | C18H14ClN2NaO6S2 | 476.886 | Sitaxsentan (sodium)                                                 |  |
| Medchem |            | O.[Na+]                                                     |                  |         |                                                                      |  |
| Express | HY-101105A | O=C(C1=CC=C(C2=CC=C(C3=NO(C)C)=N3)C=C2C)C=C1)N4CCC5=C4C=    | C32H33ClN4O3     | 557.082 | SB-224289 hydrochloride                                              |  |
| Medchem |            | C6C(OC67CCN(C)CC7)=C5.Cl                                    |                  |         |                                                                      |  |
| Express | HY-19334   | O=S(C1=CC=C(C(NC(CCCCC)=O)C=C1)(NC2=CC=C(C(CNC[C@H](O)C     | C30H40N4O6S      | 584.727 | L755507                                                              |  |
| Medchem |            | OC3=CC=C(O)C=C3)C=C2)=O                                     |                  |         |                                                                      |  |
| Express | HY-107371  | O=CC1=C(C(C(OC)=CC=C1Br)O                                   | C8H7BrO3         | 231.043 | NSC95682                                                             |  |
| Medchem |            |                                                             |                  |         |                                                                      |  |
| Express | HY-22024   | O=C1C=C(C2=CC=CC=C2)OC3=CC=CC(O)=C13                        | C15H10O3         | 238.238 | 5-Hydroxyflavone                                                     |  |
| Medchem |            |                                                             |                  |         |                                                                      |  |
| Express | HY-13455   | NCCCC1=C(C=C(C(OC)C=C2)C2=NC3=CC=C(C(OC)C=C31               | C18H20N2O2S      | 328.429 | LDN-192960                                                           |  |
| Medchem |            | O[C@H]1CCN(C1)C[C@H](C2=CC=CC=C2)N(C)C(C3=CC=CC=C3)C4=      |                  |         |                                                                      |  |
| Express | HY-107384  | CC=CC=C4)=O                                                 | C27H30N2O2       | 414.539 | Asimadoline                                                          |  |
| Medchem |            |                                                             |                  |         |                                                                      |  |
| Express | HY-108314A | NC(NCCCCCCN)=N.O=S(O)(O)=O                                  | C8H22N4O4S       | 270.348 | GC7 Sulfate                                                          |  |
| Medchem |            | N=C(N)NCCC[C@H](C(O)=O)NC(COCC(C1=CC=CC=C1)C2=CC=CC=        |                  |         | SB290157                                                             |  |
| Express | HY-101502A | C2)=O.O.C(C(F)(F)F)=O                                       | C24H29F3N4O6     | 526.51  | (trifluoroacetate)                                                   |  |
| Medchem |            |                                                             |                  |         |                                                                      |  |
| Express | HY-12336   | O=C(N1CCN(C(C2=CC=C(C(OC)C=C2)=O)CC1)/C=C/C3=CC=C(Br)C=C3   | C21H21BrN2O3     | 429.307 | NI8R189                                                              |  |
| Medchem |            |                                                             |                  |         |                                                                      |  |
| Express | HY-10992   | O=C(N[C@@H]1CNCCC1)C2=C(C=C(C(S2)C3=CC=CC(F)=C3)NC(N)=O     | C17H19FN4O2S     | 362.422 | AZD-7762                                                             |  |
| Medchem |            |                                                             |                  |         |                                                                      |  |
| Express | HY-N0170   | OCC1=CNC2=C1C=CC=C2                                         | C9H9NO           | 147.174 | Indole-3-carbinol                                                    |  |
| Medchem |            |                                                             |                  |         | GSK-LSD1                                                             |  |
| Express | HY-100546A | C1(N[C@H]2[C@H](C3=CC=CC=C3)C2)CCNCC1.Cl.Cl                 | C14H22Cl2N2      | 289.244 | Dihydrochloride                                                      |  |
| Medchem |            |                                                             |                  |         |                                                                      |  |
| Express | HY-18260   | CC(C1=CC=C(O)C=C1)(C2=CC=C(O)C=C2)C                         | C15H16O2         | 228.286 | Bisphenol A                                                          |  |
| Medchem |            |                                                             |                  |         |                                                                      |  |
| Express | HY-14167   | ClC1=CC(Cl)=C(NC2=NC=C(C(NCC3CCOCC3)=O)C(C(F)(F)F)=N2)C=C1  | C18H17Cl2F3N4O2  | 449.254 | GW842166X                                                            |  |
| Medchem |            | C[C@@]12[C@](C(C[C@@H]2C(NC(C)C)=O)([H])(C@@)3([H])(C@)([C  |                  |         |                                                                      |  |
| Express | HY-107385  | @@]4(C=C(C(O)=O)CC4)=CC3C)([H])CC1                          | C25H37NO3        | 399.566 | Epristeride                                                          |  |
| Medchem |            |                                                             |                  |         | 4-[(Piperidin-4-yl)oxy]piperidine-1-carboxylic acid tert-butyl ester |  |
| Express | HY-22026   | CC(C)(C)OC(N(CC1CCC1OC2CCNCC2)=O                            | C15H28N2O3       | 284.394 |                                                                      |  |
| Medchem |            | O=C(O)C1=CC=C(NC2=C3N=CN(C(C)C)C3=NC(N[C@@H](CO)C(C)C)=N    |                  |         |                                                                      |  |
| Express | HY-18299   | 2)C=C1Cl                                                    | C20H25ClN6O3     | 432.9   | Purvalanol                                                           |  |
| Medchem |            | O=C([C@]1([H])CC2=C([C@H](/C=C(C)C)N13)NC4=C2C=CC(OC)=C4)N  |                  |         |                                                                      |  |
| Express | HY-N2143   | 5[C@]([CC5])([H])C3=O                                       | C22H25N3O3       | 379.45  | Fumitremorgin C                                                      |  |
| Medchem |            | O=S(C1=C(C(S(=O))(C2=CC=CC=C2)=O)=CC=C1C(F)(F)F)(NC3CCNCC3) |                  |         |                                                                      |  |
| Express | HY-10858   | =O                                                          | C18H19F3N2O4S2   | 448.48  | WAY 316606                                                           |  |
| Medchem |            | ClC1=C(F)C=CC(Cl)=C1[C@H](OC2=CC(C3=CN(N=C3)C4CCNCC4)=CN=   |                  |         |                                                                      |  |
| Express | HY-50878   | C2N)C                                                       | C21H22Cl2FN5O    | 450.337 | Crizotinib                                                           |  |
| Medchem |            |                                                             |                  |         |                                                                      |  |
| Express | HY-107379  | O=S(N1CC2=CC=CC=C2CC1)(C3=CC(C(O)=O)=CC=C3)=O               | C16H15NO4S       | 317.36  | AKR1C3-IN-1                                                          |  |
| Medchem |            | OC1=C(OC)C(O)=C([C@@]2([H])(C@@)(OC3=O)([H])(C@@H)(O)(C@H   |                  |         |                                                                      |  |
| Express | HY-N0017   | )(O)(C@@H)(CO)O2)C3=C1                                      | C14H16O9         | 328.272 | Bergenin                                                             |  |
| Medchem |            |                                                             |                  |         |                                                                      |  |
| Express | HY-N0085   | O=C1C=CC2=CC(OC)=C(OC)C(OC)=C2O1                            | C12H12O5         | 236.221 | Dimethylfraxetin                                                     |  |
| Medchem |            | N[C@@H](CC1=CC=C(C2=NC(N)=NC(OC)C3=CC=C(C4=CC=CC(F)=C4)     |                  |         |                                                                      |  |
| Express | HY-15849   | C=C3)C(F)(F)F)=C2)C=C1)C(O)=O                               | C27H22F4N4O3     | 526.482 | LP-533401                                                            |  |
| Medchem |            | C[C@H]([C@](O(C@@H)1C(C)C)(C[C@@H](O)(C@@H)1C)O)(C@H)(O)    |                  |         |                                                                      |  |
| Express | HY-100558  | [C@@H]([C@](OC(C(C)C)=C(C)C)=C[C@@H](C)[C@@H](O)(C@H)(      |                  |         |                                                                      |  |
| Medchem |            | C)C2)=O)([H])(C@H)(/C=C/C=C2)OC)C                           | C35H58O9         | 622.83  | Bafilomycin A1                                                       |  |
| Express | HY-108318  | NC1=C2C(N(C3CCCC3)C=C2C4=CC=C(OC5=CC=CC=C5)C=C4)=NC=N1      | C23H22N4O        | 370.447 | RK-24466                                                             |  |
| Medchem |            | CCCCC1=C(C2=C(C=C(CS(C)=O)=O)=C2)O1)C(C3=CC=C(C=C3)OCC      |                  |         |                                                                      |  |
| Express | HY-A0016   | CN(CCCC)CCC)=O                                              | C31H44N2O5S      | 556.76  | Dronedaron                                                           |  |
| Medchem |            | O=C1C=C(CSC2=NC=CC=C2)OC=C1OC(C3=CC=C([N+])([O-             |                  |         |                                                                      |  |
| Express | HY-103254  | ))=O)C=C3)=O                                                | C17H11N3O6S      | 385.35  | ML221                                                                |  |
| Medchem |            | O=C(C1=CC=C2C=CC=CC=C1O)O.O.C3=C(CO)C=C(C(CNCCCCCO          |                  |         |                                                                      |  |
| Express | HY-17453   | CCCC4=CC=CC=C4)O)C=C3                                       | C36H45NO7        | 603.745 | Salmeterol (xinafoate)                                               |  |
| Medchem |            |                                                             |                  |         |                                                                      |  |
| Express | HY-B0192   | O=C(C1CCCC1)NCCCN(C2=NC(N)=C3C=C(C(OC)C(OC)=CC3=N2)C        | C19H27N5O4       | 389.449 | Alfuzosin                                                            |  |
| Medchem |            | C[C@@]12[C@@](C)(O)CC[C@@]1([H])(C@@)3([H])CCC4=CC(C[C@]4(  |                  |         |                                                                      |  |
| Express | HY-B2159   | C)[C@@]3(F)[C@H](O)C2)=O                                    | C20H29FO3        | 336.441 | Fluoxymesterone                                                      |  |

|         |            |                                                                                                                                                 |                |         |                                                                           |
|---------|------------|-------------------------------------------------------------------------------------------------------------------------------------------------|----------------|---------|---------------------------------------------------------------------------|
| Medchem |            |                                                                                                                                                 |                |         |                                                                           |
| Express | HY-103392  | <chem>CC(C)(C)C(O)/C=C/C1=CC=C(C(=O)CO)C2=C1</chem>                                                                                             | C14H18O3       | 234.291 | Stiripentol                                                               |
| Medchem |            |                                                                                                                                                 |                |         |                                                                           |
| Express | HY-103609  | <chem>C12=CC=C3C=CC=C4C=CC(C2=C34)=CC=C1</chem>                                                                                                 | C16H10         | 202.251 | Pyrene                                                                    |
| Medchem |            |                                                                                                                                                 |                |         |                                                                           |
| Express | HY-W008613 | <chem>O=C(O)C1=C(O)C(CC2=C3C=CC=CC3=CC(C(O)=O)=C2O)=C4C=CC=C4=C1</chem>                                                                         | C23H16O6       | 388.375 | 4,4'-Methylenebis(3-hydroxy-2-naphthoic acid)                             |
| Medchem |            |                                                                                                                                                 |                |         |                                                                           |
| Express | HY-59047   | <chem>O=C1N=CC(O)C2=CC=CC(C)=C2)CN1</chem>                                                                                                      | C11H10N2O2     | 202.209 | Tolimidone                                                                |
| Medchem |            |                                                                                                                                                 |                |         |                                                                           |
| Express | HY-100737  | <chem>CO C1=CC=C(C(N2CCN(C(C3=CC4=C(C(C=C5)C5S(C4)(=O)=O)S3)=O)CC2)C=C1</chem>                                                                  | C23H22N2O4S2   | 454.562 | ML349                                                                     |
| Medchem |            |                                                                                                                                                 |                |         |                                                                           |
| Express | HY-12956A  | <chem>CCCCC[C@H](O)/C=C/[C@H]1[C@H](O)C[C@H](O)[C@@H]1C/C=C/C(CC(CO)=O.OCC(CO)(N)CO</chem>                                                      | C24H45NO8      | 475.62  | Dinoprost (tromethamine salt)                                             |
| Medchem |            |                                                                                                                                                 |                |         |                                                                           |
| Express | HY-108319  | <chem>O=C(O)CC1=CC=C([N+])([O-])=O)C=C1)NCCCC[C@H](N)C(N2CCCC2)=O</chem>                                                                        | C18H26N4O5     | 378.42  | DPP-IV-IN-2                                                               |
| Medchem |            |                                                                                                                                                 |                |         |                                                                           |
| Express | HY-10797   | <chem>ClC1=CC=C(C(O)C2=CC=C(F)C=C2)C(C(N[C@H](C3=CC=C(C(O)=O)C=C3)C)=O)=C1</chem>                                                               | C22H17ClFNO4   | 413.826 | CJ-42794                                                                  |
| Medchem |            |                                                                                                                                                 |                |         |                                                                           |
| Express | HY-10997A  | <chem>C=CC(N1CC(N2N=C(C3=CC=C(C(O)C4=CC=CC=C4)C=C3)C5=C(N)N=CN=C52)CCC1)=O</chem>                                                               | C25H24N6O2     | 440.497 | PCI-32765 (Racemate)                                                      |
| Medchem |            |                                                                                                                                                 |                |         |                                                                           |
| Express | HY-22023   | <chem>C1(CC2=CC=CC=C2)=CC=NC=C1</chem>                                                                                                          | C12H11N        | 169.222 | 4-Benzylpyridine                                                          |
| Medchem |            |                                                                                                                                                 |                |         |                                                                           |
| Express | HY-107369  | <chem>CCCCC1=C(C=C(C(O)C=C1)O</chem>                                                                                                            | C10H14O2       | 166.217 | 4-Butylresorcinol                                                         |
| Medchem |            |                                                                                                                                                 |                |         |                                                                           |
| Express | HY-107368  | <chem>O=C(C1C(CCCC1=O)=O)C2=C(C=C(C(S(C)=O)=O)C=C2)Cl</chem>                                                                                    | C14H13ClO5S    | 328.768 | Sulcotrione                                                               |
| Medchem |            |                                                                                                                                                 |                |         |                                                                           |
| Express | HY-100578  | <chem>O=C(NC1=C2C=CC=NC2=C1)/C(C#N)=C/C3=CC=C(C4=CC(Cl)=CC=C4Cl)O3</chem>                                                                       | C23H13Cl2N3O2  | 434.274 | AGK2                                                                      |
| Medchem |            |                                                                                                                                                 |                |         |                                                                           |
| Express | HY-W016403 | <chem>O=C1C(C2=C3C1=CC=CC3=CC=C2)=O</chem>                                                                                                      | C12H6O2        | 182.178 | Acenaphthylene-1,2-dione                                                  |
| Medchem |            |                                                                                                                                                 |                |         |                                                                           |
| Express | HY-12170   | <chem>O=C([C@@H]1N(S(=O))(C2=CC=C(C(O)C3=CC=NC3)C=C2)=O)CCSC1(C)C)NO</chem>                                                                     | C18H21N3O5S2   | 423.506 | Prinomastat                                                               |
| Medchem |            |                                                                                                                                                 |                |         |                                                                           |
| Express | HY-14861A  | <chem>O=C(NC1=NC(C2CCN(C)CC2)=O)=CC=C1)C3=C(F)C=C(F)C=C3F.[H]Cl</chem>                                                                          | C19H19ClF3N3O2 | 413.82  | Lasmiditan (hydrochloride)                                                |
| Medchem |            |                                                                                                                                                 |                |         |                                                                           |
| Express | HY-13861   | <chem>CC(C)(SC1=CC=C(CCN(C(NC2CCCC2)=O)CCCC3CCCC3)C=C1)C(O)=O</chem>                                                                            | C29H46N2O3S    | 502.75  | GW7647                                                                    |
| Medchem |            |                                                                                                                                                 |                |         |                                                                           |
| Express | HY-90009A  | <chem>O=C([C@@]1([H])CC2=C([C@@H](C3=CC=C(C(O)CO)C4=C3)N15)NC6=C2C=CC=C6)N(C)CC5=O</chem>                                                       | C22H19N3O4     | 389.404 | Tadalafil                                                                 |
| Medchem |            |                                                                                                                                                 |                |         |                                                                           |
| Express | HY-12222   | <chem>C([C@@]1([C@]2([H])([H])(C@@H)(CC)[C@H]2O)(CC[C@H](O)C1)[C@]3([H])([C@]2([H])([C@@])(CC[C@]4([H])([C@H](C)CCC(O)=O)([H])(C@]4(C)CC</chem> | C26H44O4       | 420.625 | INT-747                                                                   |
| Medchem |            |                                                                                                                                                 |                |         |                                                                           |
| Express | HY-108325  | <chem>O=C(C1=C(C(C)C2=CC=C(C3=CC=CC=C3F)C=C2)=NC4=CC=C(F)C=C14)O</chem>                                                                         | C23H15F2NO2    | 375.368 | Brequinar                                                                 |
| Medchem |            |                                                                                                                                                 |                |         |                                                                           |
| Express | HY-106441A | <chem>O=C(N1C[C@@H](F)[C@@H](CNC2=NC=CC=N2)CC1)OCC3=CC=C(C)C=C3</chem>                                                                          | C19H23FN4O2    | 358.41  | Rislenemdaz                                                               |
| Medchem |            |                                                                                                                                                 |                |         |                                                                           |
| Express | HY-B1751   | <chem>C=C[C@H]1C[N@](CC[C@H]1C2)[C@@]2([H])([C@@H](O)C3=CC=NC4=CC=C(O)C=C34</chem>                                                              | C20H24N2O2     | 324.417 | Quinidine                                                                 |
| Medchem |            |                                                                                                                                                 |                |         |                                                                           |
| Express | HY-100788  | <chem>O=C(O)C(CP(O)(O)=O)CCC(O)=O</chem>                                                                                                        | C6H11O7P       | 226.121 | 2-PMPA                                                                    |
| Medchem |            |                                                                                                                                                 |                |         |                                                                           |
| Express | HY-108324  | <chem>O=S(C1=CC(/C2=C(CCN3CCN(C)CC3)=C(SC4=C2C=CC=C4)C=C1)(N(C)C)=O</chem>                                                                      | C23H29N3O2S2   | 443.625 | (Z)-Thiothixene                                                           |
| Medchem |            |                                                                                                                                                 |                |         |                                                                           |
| Express | HY-Y0355   | <chem>ClC1=NC(Cl)=NC(Cl)=N1</chem>                                                                                                              | C3Cl3N3        | 184.411 | Cyanuric chloride                                                         |
| Medchem |            |                                                                                                                                                 |                |         |                                                                           |
| Express | HY-50108   | <chem>O=C(C1=CC=CC(/C=C/C2=CC=C(C=C2)OCC3=C(ON=C3C4=C(C)C=C4C4Cl)C(C)C=C1)O</chem>                                                              | C28H22Cl3NO4   | 542.84  | GW 4064                                                                   |
| Medchem |            |                                                                                                                                                 |                |         |                                                                           |
| Express | HY-103107  | <chem>O=C(C1=CC=C(F)C=C1)NC2=CC3=C(C=C2)NC=C3C4CCN(C)CC4</chem>                                                                                 | C21H22FN3O     | 351.42  | LY334370                                                                  |
| Medchem |            |                                                                                                                                                 |                |         |                                                                           |
| Express | HY-15245   | <chem>CC1=NC2=C(C(O)=O)C=C(C(C=C2N1CC3=CC=CC(C(F)(F)F)=C3)N4CCOCC4</chem>                                                                       | C22H22F3N3O3   | 433.424 | GSK2636771                                                                |
| Medchem |            |                                                                                                                                                 |                |         |                                                                           |
| Express | HY-103610  | <chem>O=C(C1=CC=C(C(O)C=C1)C(C2=CC=C(C(O)C=C2)=O</chem>                                                                                         | C16H14O4       | 270.28  | 4,4'-Dimethoxybenzil                                                      |
| Medchem |            |                                                                                                                                                 |                |         |                                                                           |
| Express | HY-W012484 | <chem>NCCC1=CC=CC=C1Br</chem>                                                                                                                   | C8H10BrN       | 200.079 | 2-Bromophenethylamine                                                     |
| Medchem |            |                                                                                                                                                 |                |         |                                                                           |
| Express | HY-20891   | <chem>CCC(/C(C)=C/C1=CC=C(F)C=C1)=N.O</chem>                                                                                                    | C12H14FNO      | 207.244 | 2-Bromophenethylamine 1-Penten-3-one, 1-(4-fluorophenyl)-2-methyl-, oxime |
| Medchem |            |                                                                                                                                                 |                |         |                                                                           |
| Express | HY-17385   | <chem>CC1=CC=CC=C1O[C@@H](C2=CC=CC=C2)CCNC.[H]Cl</chem>                                                                                         | C17H22ClNO     | 291.816 | Atomoxetine (hydrochloride)                                               |
| Medchem |            |                                                                                                                                                 |                |         |                                                                           |
| Express | HY-17042A  | <chem>O=C(O)COCCN1CCN(C2=CC=C(C)C=C2)C3=CC=CC=C3)CC1.Cl.Cl</chem>                                                                               | C21H27Cl3N2O3  | 461.81  | Cetirizine (dihydrochloride)                                              |

|         |         |           |                                                                                                                                                                                                                  |                |         |                           |
|---------|---------|-----------|------------------------------------------------------------------------------------------------------------------------------------------------------------------------------------------------------------------|----------------|---------|---------------------------|
| Medchem | Express | HY-108315 | NC1=C2C=CC=CC2=C3C(C4=CC=CC=C4C=C3)=C1                                                                                                                                                                           | C18H13N        | 243.303 | 6-Aminochrysene           |
| Medchem | Express | HY-108317 | O=C(N1N(C(OC)=O)[C@@](C2=CC=CC=C2)(C3CCCC3)C1=O)OC                                                                                                                                                               | C17H20N2O5     | 332.351 | ABL127                    |
| Medchem | Express | HY-B0800  | NC(NCCN1CCCCCCC1)=N.O=S(O)(O)=O                                                                                                                                                                                  | C10H24N4O4S    | 296.39  | Guanethidine (sulfate)    |
| Medchem | Express | HY-101932 | C[C@]1([C@@H](C/C=C(C)/C)O1)[C@]([C@@H]2OC([H])[C@]3(CC[C@@H]2OC(NC(C)=O)=O)CO3                                                                                                                                  | C19H28ClNO6    | 401.88  | TNP-470                   |
| Medchem | Express | HY-18234A | O=S(O)(O)=O.O=C(N[C@H](C(N[C@H](C([H])=O)CCNC(N)=N)=O)CC(C)C)[C@@H](NC(C)=O)CC(C)C.O=C(N[C@H](C(N[C@H](C([H])=O)CCCNC(N)=N)=O)CC(C)C)[C@@H](NC(C)=O)CC(C)C                                                       | C40H78N12O12S  | 475.59  | Leupeptin (hemisulfate)   |
| Medchem | Express | HY-10358  | O=C1N2C(C3=CC(C4=CC=CC=C4)=C(N=C3C=C2)C5=CC=C(C6(N)CCC6)C=C5)=NN1.Cl.Cl                                                                                                                                          | C25H23Cl2N5O   | 480.39  | MK 2206 (dihydrochloride) |
| Medchem | Express | HY-N0700  | C/C=C/C1=C(C(OC)C=C(C(OC)C(OC)=C1                                                                                                                                                                                | C12H16O3       | 208.25  | alpha-Asarone             |
| Medchem | Express | HY-12355  | O=C(C1CN(CC2=CC=C(C/C(C)=N/OCC3=CC=C(C4CCCC4)C(C(F)F)F)=C3)C=C2CC)C1)O                                                                                                                                           | C29H35F3N2O3   | 516.6   | Siponimod                 |
| Medchem | Express | HY-10029  | O=C(N1C(C2=C(C=C(C2)OC)OC(C)C)=N[C@H]([C@H]1C3=CC=C(C=C3)Cl)C4=CC=C(C=C4)Cl)N5CC(NCC5)=O                                                                                                                         | C30H30Cl2N4O4  | 581.49  | Nutlin (3a)               |
| Medchem | Express | HY-A0013  | O=S(NC1=NC(C2=NC=CC=N2)=NC(OCO)=C1OC3=CC=CC=C3OC)/C4=CC=C(C(C)(C)C)C=C4)=O                                                                                                                                       | C27H29N5O6S    | 551.61  | Bosentan                  |
| Medchem | Express | HY-15187  | O=C(N1[C@@]([C2=CC=CC=C2](CCCN)SC(C3=CC(F)=CC=C3F)=N1)N(OC)C                                                                                                                                                     | C20H22F2N4O2S  | 420.48  | ARRY-520                  |
| Medchem | Express | HY-76948  | O=C(O[C@@H]1CNC(C2=CC=C(C)S2)=O)N(C1)C(C=C3)=CC=C3N4C(C(OC)C4)=O                                                                                                                                                 | C19H18ClN3O5S  | 435.88  | 5-R-Rivaroxaban           |
| Medchem | Express | HY-13327  | O=C([C@H]1CC[C@H](CN2CCC[C@H](N(CC3=CC(C(F)F)=CC(C(F)F)F)=C3)C4=NN(C)N=N4)C5=CC(C)=CC(C)=C52)CC1)O                                                                                                               | C31H36F6N6O2   | 638.65  | Evacetrapib               |
| Medchem | Express | HY-10001  | C=C1[C@H](C[C@H](C/C1=C/C=C2[C@]3([C@@]([C@H](CC3)[C@@H]//C=C/[C@H](C4CC4)O)C)CCC2[H])O)O                                                                                                                        | C27H40O3       | 412.6   | Calcipotriol              |
| Medchem | Express | HY-B1017  | O=C1C2=C(NC(C)=C2CC)CCC1CN3CCOCC3.[H]Cl                                                                                                                                                                          | C16H25ClN2O2   | 312.83  | Molindone (hydrochloride) |
| Medchem | Express | HY-12424  | CO[C@H]1[C@@H](N2C=NN=N2)CC[C@H](C[C@H]([C@@](CC([C@@H]//C=C([C@H]([C@H](C([C@H](C[C@@H]3C)C)=O)O(C)O)C)C)=O)([H])O(C([C@@](CCCC4)([H])N4C(C([C@](O)C@]5([H])C[C@@H]//C(C)=C/C=C/C3)OC)([C@H](CC5)C)O)=O)=O)O)C1 | C52H79N5O12    | 966.21  | Zotatarlimus              |
| Medchem | Express | HY-17377  | CC1(N2C[C@H](C)N([C@H](C3=CC=C(C(F)F)F)C=C3)CO(C)CC2)CCN(C(C4=C(C)N=CN=C4C)=O)CC1.O=C(C)O/C=C(Cl)O)=O                                                                                                            | C32H42F3N5O6   | 649.7   | Vicriviroc (maleate)      |
| Medchem | Express | HY-10801  | O=C(CN1C(C=CC(C(O)=O)=C2)=C2C(C(C(C)C)=O)=C1)CO(C(C=C3)=CC=C3O)C4=CC=CC=C4                                                                                                                                       | C28H25NO6      | 471.5   | CAY10650                  |
| Medchem | Express | HY-11093  | C[C@H]1CNCCC2=CC=C(C)C=C12                                                                                                                                                                                       | C11H14ClN      | 195.69  | Lorcaserin                |
| Medchem | Express | HY-13511A | CC1=CN=CC(CN2CC(C(C2)=C3C4=CC=C(C)C)C=C4CCC5=CC=CN=C5)3)=C1.O=C(C)O/C=C(C)O)=O                                                                                                                                   | C30H30ClN3O4   | 532.03  | Rupatadine (Fumarate)     |
| Medchem | Express | HY-15478  | C1(CNC2=NC=CC=C2)=CC=C(CNC3=NC=CC=C3)C=C1                                                                                                                                                                        | C18H18N4       | 290.36  | WZ811                     |
| Medchem | Express | HY-50844  | CC(N)(C(N[C@H](C1NCCC2(CN(C3=C2C=CC=C3)S(=O)(O)C)=O)CC1)=O)COCC4=CC=CC=C4)O.C.S(=O)(O)=O                                                                                                                         | C28H40N4O8S2   | 624.77  | Ibutamoren (Mesylate)     |
| Medchem | Express | HY-10997  | C=CC(N1C[C@H](N2N=C(C3=CC=C(C)O)C4=CC=CC=C4)C=C3)C5=C(N)N=CN=C52)CCC1)=O                                                                                                                                         | C25H24N6O2     | 440.5   | PCI-32765                 |
| Medchem | Express | HY-11000  | O=C(C(C(C1=CC=C(C(F)F)C=C1)C2)=C(C)NC2=O)NC3=CC4=C(NN=C4)C=C3F                                                                                                                                                   | C21H16F4N4O2   | 432.37  | GSK429286A                |
| Medchem | Express | HY-A0096  | O=C(O)CCC/C=C1C[C@@]2([H])C[C@@H](O)[C@H]//C=C/[C@@H](O)C(C)CC#CC[C@@]2([H])C1                                                                                                                                   | C22H32O4       | 360.49  | Iloprost                  |
| Medchem | Express | HY-19329  | O=C1N(CC2=CC=C(F)C=C2)C(S/C1=C)C3=CC=C(C(OC4=CC(B(O)O)=C=C4)C=C3)=O                                                                                                                                              | C24H19BFNO5S   | 463.29  | HA130                     |
| Medchem | Express | HY-12684  | O=C(C1=CC=NN1C)NC2=CC=C(C/N=N/C3=CC=CC=C3)C=C2C                                                                                                                                                                  | C19H19N5O      | 333.39  | CH-223191                 |
| Medchem | Express | HY-12299  | O=C(OC1=C(C)C=CC=C1C)N(C2=CC=C(C(OC)C=C2O)C3=NC(NC4=CC=C(N5CCN(C)CC5)C=C4)=NC=C3                                                                                                                                 | C32H36N6O4     | 568.67  | WH-4-023                  |
| Medchem | Express | HY-10460  | CS(=O)(N(C)C1=CC=CC=C1CNC2=NC(NC3=CC4=C(C=C3)NC(C4)=O)=N=C2C(F)F)F)=O                                                                                                                                            | C22H21F3N6O3S  | 506.5   | PF-431396                 |
| Medchem | Express | HY-15968  | C12=NC=CN1C=C(C3=CC4=C(C=C3)C=NN4)N=C2NC5=CC=C(N6CCOCC6)C=C5                                                                                                                                                     | C23H21N7O      | 411.46  | GS-9973                   |
| Medchem | Express | HY-13343  | O=C(NC1=CC=C(C)C(NC(C2=CC=C(O)C=C2)=O)=C1)C3=CC=CC(N(C)C)=C3                                                                                                                                                     | C23H23N3O3     | 389.45  | ZM 336372                 |
| Medchem | Express | HY-15196  | ClC(C=C(NC1=NC=NC2=C1N(CCN(C(C(C)O)=O)C=C2)C=C3)=C3O)C4=CC=CC(C(F)F)F)=C4                                                                                                                                        | C26H25ClF3N5O3 | 547.96  | TAK-285                   |

|         |            |                                                             |                 |        |                            |
|---------|------------|-------------------------------------------------------------|-----------------|--------|----------------------------|
| Medchem |            | O=C(C1=CC=CC=C1C2=CC=C(CN3C4=CC(C5=NC6=CC=CC=C6N5C)=C       |                 |        |                            |
| Express | HY-13955   | C(C)=C4N=C3CCC(C)=C2)O                                      | C33H30N4O2      | 514.62 | Telmisartan                |
| Medchem |            | O=C(C1=CC(C2=CC=C(N3CCNCC3)N=C2)=CC4=C1C(C)=CN4[C@@H](C     |                 |        |                            |
| Express | HY-13470   | )CC)NCC5=C(C(C)=C(C)NC5=O                                   | C31H38N6O2      | 526.67 | GSK126                     |
| Medchem |            | O=C(NC1=CC=CN=C1)C2=CC=C(CNS(=O)(C3=CC=C(C(C)(C)C)=C3)=     |                 |        |                            |
| Express | HY-18728   | O)C=C2                                                      | C23H25N3O3S     | 423.53 | STF-31                     |
| Medchem |            | O=C(C1=CC=C(C(C(F)(F)F)=C1)CN2C[C@@H](N(C)C)CC2)NC3=CC=C(C  |                 |        |                            |
| Express | HY-50868   | C(C)(NC4=NC=CC(C5=CN=CN=C5)=N4)=C3                          | C30H31F3N8O     | 576.62 | Bafetinib                  |
| Medchem |            | O=C1N(C2=C(C(N1CC3=NC(C)=C4C=CC=C4=N3)=O)N(CC#CC)C(N5CC     |                 |        |                            |
| Express | HY-10284   | C[C@@H](N)C5=N2)C                                           | C25H28N8O2      | 472.54 | Linagliptin                |
| Medchem |            | CS(=O)(NC1=CC=CC=C1NC2=NC(NC3=CC=C(N4CCOCC4)C=C3OC)=N       |                 |        |                            |
| Express | HY-15800A  | C=C2F)=O                                                    | C22H25FN6O4S    | 488.54 | CZC-25146                  |
| Medchem |            | O=C1N2C(C([C@H](NC3=CC=CC=C3C(O)=O)C)=CC(C)=C2)=NC(N4CC     |                 |        |                            |
| Express | HY-10344   | OCC4)=C1                                                    | C22H24N4O4      | 408.45 | AZD 6482                   |
| Medchem |            | O=C1C(C(NC2=CC=CC(C(N(C)C)=O)=C2O)=C1N[C@H](CC)C3=CC=C(C(O  |                 |        |                            |
| Express | HY-10198   | 3)C)=O                                                      | C21H23N3O5      | 397.42 | SCH 527123                 |
| Medchem |            | O=C(CN)NC1=CC=C(C=C1)N2N=C(C=C2C3=CC=C4C5=CC=CC=C5C=C       |                 |        |                            |
| Express | HY-10547   | C4=C3)C(F)(F)F                                              | C26H19F3N4O     | 460.45 | OSU-03012                  |
| Medchem |            |                                                             |                 |        |                            |
| Express | HY-20019   | O=C(O)CO(C(C=C1)=CC=C1OCCOC2=CC=C(C(C)=O)C(O)=C2CCC         | C22H26O7        | 402.44 | L-165041                   |
| Medchem |            | O=C1N(C(CN2C3=C(C(N)=NC=N3)N=C2)=NC4=CC=CC(C)=C14)C5=C(C(C  |                 |        |                            |
| Express | HY-10110   | C=CC=C5                                                     | C22H19N7O       | 397.43 | IC-87114                   |
| Medchem |            |                                                             |                 |        |                            |
| Express | HY-106150B | CS(=O)(C1=C(N2C=CC=C2)C=C(C)C(C(NC(N)=O)=O)=C1)O.[H]Cl      | C14H17ClN4O3S   | 356.83 | Eniporide hydrochloride    |
| Medchem |            |                                                             |                 |        |                            |
| Express | HY-15601   | O=C1NC2=C(N)N=C(OCCCC)N=C2N(CC3=CC=CC(CN4CCCC4)=C3)C1       | C22H30N6O2      | 410.51 | GS-9620                    |
| Medchem |            |                                                             |                 |        |                            |
| Express | HY-14289   | CC1=C(CSCC/N=C(NC)/NC#N)NC=N1                               | C10H16N6S       | 252.34 | Cimetidine                 |
| Medchem |            |                                                             |                 |        |                            |
| Express | HY-12043   | CC(C)(C1=NC(C2=CC=CC(C)=N2)=C(C3=CC=C4N=CC=NC4=C3)N1)C      | C21H21N5        | 343.42 | SB 525334                  |
| Medchem |            | CC1=NNC(NC2=NN3C(C(CN4CCOCC4)=C2)=NC(C)=C3CC5=CC=C(C=C5     |                 |        |                            |
| Express | HY-13034   | F)Cl)=C1                                                    | C23H25ClFN7O    | 469.94 | LY2784544                  |
| Medchem |            | F(C(F)(C1=NN=C2C=CC(C3=CN(C)N=C3)=NN21)C4=CC5=C(N=CC=C5)C   |                 |        |                            |
| Express | HY-50683   | =C4                                                         | C19H13F2N7      | 377.35 | JNJ-38877605               |
| Medchem |            |                                                             |                 |        |                            |
| Express | HY-10505   | O=C(C1=CC=C2C=C(C([C@@]3(O)CCN4C=NC=C43)C=CC2=C1)NC         | C18H17N3O2      | 307.35 | Orteronel                  |
| Medchem |            |                                                             |                 |        |                            |
| Express | HY-B0006   | OC(CNCCOC1=CC=CC=C1O)CO C2=CC=CC(N3)=C2C4=C3C=CC=C4         | C24H26N2O4      | 406.47 | Carvedilol                 |
| Medchem |            |                                                             |                 |        |                            |
| Express | HY-17372   | O=C1OCC(C2=CC=C(S(=O)(C)=O)C=C2)=C1C3=CC=CC=C3              | C17H14O4S       | 314.36 | Rofecoxib                  |
| Medchem |            |                                                             |                 |        |                            |
| Express | HY-15466   | NC1=NC=C(C2=C3C(N(S(=O)(C)=O)CC3)=NC(N4CCOCC4)=N2)C=N1      | C15H19N7O3S     | 377.42 | CH5132799                  |
| Medchem |            | C[C@@](C1=CC(C(F)(F)F)=CC(C(F)(F)F)=C1)([H])OC[C@@]2(C3=CC= |                 |        |                            |
| Express | HY-14751   | CC=C3)CC[C@@](CCC4=O)(N4)CN2                                | C25H26F6N2O2    | 500.48 | Rolapitant                 |
| Medchem |            | CCCC[C@H](C([O-                                             |                 |        |                            |
| Express | HY-15894   | ])=O)NC([C@H](CC1=CN(C(O)C)=O)C2=CC=CC=C12)NC([C@H](CC(C)   | C34H50N5NaO7    | 663.78 | BQ-788 (sodium salt)       |
| Medchem |            | (C)C)NC(N3[C@H](C)CCC[C@@H]3C)=O)=O.[Na+]                   |                 |        |                            |
| Express | HY-70044   | O=C(NC1=CC=C(C2=NN(C=C2C3=C4C(NC(C5=CC=CC(CN(C)C)=C5)=C4    | C30H33N7O       | 507.63 | GSK-1070916                |
| Medchem |            | )=NC=C3)CC(C=C1)N(C)C                                       |                 |        |                            |
| Express | HY-15227   | NC1=C2C(N([C@H]3[C@H](O)[C@H](O)[C@H](CN(C(C)C)CCNC(NC4     | C28H41N7O4      | 539.67 | EPZ004777                  |
| Medchem |            | =CC=C(C(C)(C)C)=C4)=O)O3)C=C2)=NC=N1                        |                 |        |                            |
| Express | HY-50098   | CN(N=C1C2=CC=C(OCC3=NC4=CC=CC=C4C=C3)C=C2)C=C1C5=CC=N       | C25H20N4O       | 392.45 | PF-2545920                 |
| Medchem |            | C=C5                                                        |                 |        |                            |
| Express | HY-51424   | O=S(NC1=CC=C(C(C(C2=CNC3=NC=C(C=C23)Cl)=O)=C1F)F)(CCC)=O    | C17H14ClF2N3O3S | 413.83 | PLX-4720                   |
| Medchem |            | O=C(NC1=CC=C(O)C=C1)C[C@H]2C3=NN=C(C)N3C4=C(C(C)=C(C)S4)C   |                 |        |                            |
| Express | HY-15743   | (C5=CC=C(C)C=C5)=N2                                         | C25H22ClN5O2S   | 491.99 | OTX-015                    |
| Medchem |            |                                                             |                 |        |                            |
| Express | HY-10012   | O=S(C1=CC=C(NC2=NC(C3=CN=C(N3C(C)C)C)=CC=N2)C=C1)(C)=O      | C18H21N5O2S     | 371.46 | AZD-5438                   |
| Medchem |            | O=S(C1(C2=CC(N3[C@H](C)COC3)=NC(C4=CC=CC=C4C=CN5)=N2)C      | C21H24N4O3S     | 412.51 | AZ20                       |
| Express | HY-15557   | C1(C)=O                                                     |                 |        |                            |
| Medchem |            |                                                             |                 |        |                            |
| Express | HY-12152   | O=C(NC1=CC(Cl)=C(C=C1O)C)NC2=NO(C)C=C2                      | C13H14ClN3O4    | 311.72 | PNU-120596                 |
| Medchem |            |                                                             |                 |        |                            |
| Express | HY-14197A  | C#CCN(CCCOC1=CC=C(Cl)C=C1Cl)C.[H]Cl                         | C13H16Cl3NO     | 308.63 | Clorgiline (hydrochloride) |
| Medchem |            |                                                             |                 |        |                            |
| Express | HY-19975   | O=S(C1=CC=C(Cl)C=C1Cl)(N(C(C)C)CCNC(C)C)=O                  | C14H22Cl2N2O2S  | 353.31 | RN-1734                    |

|         |           |                                                                                                                                                           |               |        |                                  |
|---------|-----------|-----------------------------------------------------------------------------------------------------------------------------------------------------------|---------------|--------|----------------------------------|
| Medchem |           | <chem>CC([C@H]1CC[C@@]2([H])[C@]3([H])CCC4=CC(CC[C@]4(C)[C@@]3([H])CC[C@]12C)=O)=O</chem>                                                                 | C21H30O2      | 314.46 | Progesterone                     |
| Express | HY-N0437  |                                                                                                                                                           |               |        |                                  |
| Medchem |           | <chem>O=C1=CC=C2C(CC[C@]3([H])[C@]2([H])CC[C@@]4(C)[C@]3([H])CC[C@]4(C#C)O)=C1</chem>                                                                     | C20H24O2      | 296.4  | Ethinyl Estradiol                |
| Express | HY-B0216  |                                                                                                                                                           |               |        |                                  |
| Medchem |           | <chem>O=C([C@H]1CN(CC/C=C(C2=C(C)C=CS2)/C3=C(C)C=CS3)CCC1)O.[H]Cl</chem>                                                                                  | C20H26ClNO2S2 | 412.01 | Tiagabine (hydrochloride)        |
| Express | HY-B0696A |                                                                                                                                                           |               |        |                                  |
| Medchem |           | <chem>O=C(NO)C1=CC=C(CN(CCCC)C(NC2=CC=CC=C2)=O)C=C1</chem>                                                                                                | C19H23N3O3    | 341.4  | Nexturastat A                    |
| Express | HY-16699  |                                                                                                                                                           |               |        |                                  |
| Medchem |           | <chem>O=C(O)/C=C/C1=CC=C(CN2C=CN=C2)C=C1</chem>                                                                                                           | C13H12N2O2    | 228.25 | Ozagrel                          |
| Express | HY-B0428  |                                                                                                                                                           |               |        |                                  |
| Medchem |           | <chem>ClC1=CC=C(C(C)C(C(NN3CCCC3)=O)=NN2C4=CC=C(C(C)C=C4Cl)C=C1.Cl</chem>                                                                                 | C22H22Cl4N4O  | 500.25 | Rimonabant<br>(Hydrochloride)    |
| Express | HY-14137  |                                                                                                                                                           |               |        |                                  |
| Medchem |           | <chem>O=C([C@H]1N(C(CSC2=NC3=CC=CC=C3N2C)=O)CCC1)NC4=CC=CC=C4C5=CC=CC=C5</chem>                                                                           | C27H26N4O2S   | 470.59 | TCS 1102                         |
| Express | HY-10900  |                                                                                                                                                           |               |        |                                  |
| Medchem |           | <chem>CC(N1C2=CC(C3=NC(NC4=NC=C(CN5CCN(CC)CC5)C=C4)=NC=C3F)=C(C(F)=C2N=C1C)C.CS(=O)(O)=O</chem>                                                           | C28H36F2N8O3S | 602.7  | LY2835219                        |
| Express | HY-16297  |                                                                                                                                                           |               |        |                                  |
| Medchem |           | <chem>OC1=C(C(C)(C)C)C=C(C(C)C=C1C(C)(C)C</chem>                                                                                                          | C15H24O       | 220.35 | 2,6-Di-tert-butyl-4-methylphenol |
| Express | HY-Y0172  |                                                                                                                                                           |               |        |                                  |
| Medchem |           | <chem>O=C(N(CCCCN1CCN(C2=NC=CC=N2)CC1)C(C3)=O)CC43CCCC4.[H]Cl</chem>                                                                                      | C21H32ClN5O2  | 421.96 | Buspirone (hydrochloride)        |
| Express | HY-B1115  |                                                                                                                                                           |               |        |                                  |
| Medchem |           | <chem>F=C1=CC2=C(N=CN=C2C=C1)NCC3=CC=C(F)C=C3</chem>                                                                                                      | C15H11F2N3    | 271.26 | Spautin-1                        |
| Express | HY-12990  |                                                                                                                                                           |               |        |                                  |
| Medchem |           | <chem>O=C1CC[C@]2([H])[C@@]([C]1C)[C@]3([H])[C@@]4(C)C=CC(C=C4CC[C@]32[H])=O)(C)O1</chem>                                                                 | C19H24O3      | 300.39 | Testolactone                     |
| Express | HY-13763  |                                                                                                                                                           |               |        |                                  |
| Medchem |           | <chem>C#CC1=CC(NC2=C(C=C(C(OCOCOCOCOC3)C3=C4)C4=NC=N2)=CC=C1.[H]Cl</chem>                                                                                 | C22H22ClN3O4  | 427.88 | Icotinib (Hydrochloride)         |
| Express | HY-15164  |                                                                                                                                                           |               |        |                                  |
| Medchem |           | <chem>F=C1=C(C2=C(C(N3[C@H](CC4=NN=C(C5=CC=CC=C5)O4)CCC3)=O)N=C(C)S2)C=CC=C1</chem>                                                                       | C24H21FN4O2S  | 448.51 | SB-674042                        |
| Express | HY-10898  |                                                                                                                                                           |               |        |                                  |
| Medchem |           | <chem>ClC1=CC=C(C=C1)CC2(CCN(CC2)C3=NC=NC4=C3C=CN4)N</chem>                                                                                               | C18H20ClN5    | 341.84 | CCT128930                        |
| Express | HY-13260  |                                                                                                                                                           |               |        |                                  |
| Medchem |           | <chem>OC(C=C1)=CN=C1C2=NO(C(C(C)C(C(NC3=C(C(O)=O)CCCC3)=O)=N2O=C1O[C@]2([H])[C@@H](O)C3=C(C=C4OCOC4=C3)[C@@H](C5=C(C(O)C=C(O)C(C)C5)=C5)[C@@]21[H]</chem> | C19H22N4O5    | 386.4  | MK-6892                          |
| Express | HY-10680  |                                                                                                                                                           |               |        |                                  |
| Medchem |           | <chem>CC1=CC(NC2=NC(SC3=CC=C(C=C3)NC(C4CC4)=O)=NC(N5CCN(CC5)C)=C2)=NN1</chem>                                                                             | C22H22O8      | 414.41 | AXL1717                          |
| Express | HY-15494  |                                                                                                                                                           |               |        |                                  |
| Medchem |           | <chem>F=C1=CC2=C3C(CCN2=O)=C(C4=CC=C(CNC)C=C4)NC3=C1.O=S(C[C@@]5(C6(C)C)C(C[C@@]6([H])CC5)=O)(O)=O</chem>                                                 | C23H28N8OS    | 464.59 | Tozasertib                       |
| Express | HY-10161  |                                                                                                                                                           |               |        |                                  |
| Medchem |           |                                                                                                                                                           | C29H34FN3O5S  | 555.66 | Rucaparib (Camsylate)            |
| Express | HY-102003 |                                                                                                                                                           |               |        |                                  |
